# Supplementary material
Source: PubMed Central journal article supplement (PMC2749747)
Supplement: mmc1.pdf [file mmc1.pdf]

Biophysical Journal, Volume 97

**Supporting Material**

**An Energetic Representation of Protein Architecture that is Independent of Primary and Secondary Structure**

Jason Vertrees, James O Wrabl, and Vincent J Hilser

## Supporting Material: Methods Details for Vertrees, *et al.* “An Energetic Representation of Protein Architecture that is Independent of Primary and Secondary Structure”

### *Thermodynamic environment space of proteins defined from native state ensembles*

Previously, we described the COREX/BEST algorithm (1-3), which generates a conformational ensemble for a protein using the high-resolution structure as a template. COREX/BEST requires as input the three-dimensional structural coordinates of a protein and, after processing a large number of conformational microstates varying from fully folded to fully unfolded, outputs a thermodynamic (*i.e.* energetic) model of the protein’s native state ensemble. This algorithm has been vetted in both retrospective validation (4-7) and prediction (1), and thus provides a reasonable representation of the ensemble. For this work, a COREX/BEST analysis was performed on each member of a database of 120 diverse human proteins (8, 9) (Table S1 in the Supporting Material) using the default parameters: window size, 5; minimum window size, 4; temperature  $T$ , 25.0 °C; and entropy weighting,  $W$ , 0.5. For shorter proteins, those with lengths less than approximately 100 residues, the full ensemble was enumerated. For longer proteins, where calculation of a full ensemble would be prohibitive, a Monte Carlo ensemble was enumerated with a fixed sample size of 250,000 microstates. This sample size had been previously determined to accurately represent the thermodynamic information contained in the full ensemble while requiring fewer computational resources (8). All proteins in this set were between 50–250 residues in length, devoid of missing coordinates, and with resolution  $\leq 2.5$  Å. Secondary structure was assigned using STRIDE (10).

In Eqs. 1 — 4 of the main text,  $[\Delta G]_j$ ,  $[\Delta H_{ap}]_j$ ,  $[\Delta H_{pol}]_j$ , and  $[T\Delta S_{conf}]_j$  were the residue specific thermodynamic descriptors for the native state ensemble at position  $j$ ,  $P_i$  was the Boltzmann weighted probability of a particular microstate  $i$  in the entire ensemble, and  $P_{i,F_j}$  or  $P_{k,NF_j}$  were the respective probabilities in the folded ( $Q_{F_j}$ ) or unfolded ( $Q_{NF_j}$ ) subensembles of a microstate  $i$  or  $k$  containing residue  $j$  in either a folded or unfolded conformation. Symbolically, these probabilities were:

$$P_i = \frac{\exp\left(\frac{-\Delta G_i}{RT}\right)}{\sum_k \exp\left(\frac{-\Delta G_k}{RT}\right)} = \frac{\exp\left(\frac{-\Delta G_i}{RT}\right)}{Q}, \quad (\text{S1})$$

$$P_{i,F_j} = \frac{\exp\left(\frac{-\Delta G_i}{RT}\right)}{\sum_{k \in F_j} \exp\left(\frac{-\Delta G_k}{RT}\right)} = \frac{\exp\left(\frac{-\Delta G_i}{RT}\right)}{Q_{F_j}}, \quad (\text{S2})$$

$$P_{i,NF_j} = \frac{\exp\left(\frac{-\Delta G_i}{RT}\right)}{\sum_{k \in NF_j} \exp\left(\frac{-\Delta G_k}{RT}\right)} = \frac{\exp\left(\frac{-\Delta G_i}{RT}\right)}{Q_{NF_j}}, \quad (\text{S3})$$

where  $i$  was the index for all  $N$  states in the complete ensemble or the folded ( $N_{F_j}$ ) or unfolded ( $N_{NF_j}$ ) subensembles,  $R$  was the gas constant, and  $T$  was the temperature of the ensemble.  $\Delta G_i$  was the Gibbs free energy of folding of microstate  $i$ , estimated from a surface area-based parameterization of a variant of the Gibbs—Helmholtz equation (1, 2),

$$\Delta G_i = \Delta H_i(T_{0,H}) - T\Delta S_i(T_{0,S}) - W \cdot T\Delta S_{i,conf} + \Delta C_{p,i} \left[ (T - T_{0,H}) - T \ln \frac{T}{T_{0,S}} \right], \quad (\text{S4})$$

where  $W \cdot T\Delta S_{i,conf}$  was an empirical conformational entropy term (11), and  $\Delta C_{p,i}$  was the heat capacity. The heat capacity was related to the change in solvent accessible surface area of unfolding,  $\Delta ASA$ , by the linear function (12, 13)

$$\Delta C_{p,i} = \Delta C_{p,ap} + \Delta C_{p,pol} = 0.45 \cdot \Delta ASA_{ap} - 0.26 \cdot \Delta ASA_{pol}. \quad (\text{S5})$$

The enthalpy and entropy of the same unfolding reaction were also parameterized as linear functions of surface area (11, 14, 15):

$$\Delta H_i(T_{0,H}) = -8.44 \cdot \Delta ASA_{ap} + 31.4 \cdot \Delta ASA_{pol}, \quad (\text{S6})$$

$$\Delta S_i(T_{0,S}) = \Delta C_{p,ap} \ln\left(\frac{T}{385}\right) - \Delta C_{p,pol} \ln\left(\frac{T}{335}\right), \quad (\text{S7})$$

where the 385 and 335 referred to the temperatures in Kelvin at which the apolar and polar solvation entropies are zero, respectively.

Finally, for each residue  $j$  two partitions (mutually exclusive subsets) were created, the union of which was the complete set  $S$  of  $N$  microstates; one consisted of all the  $N_{F_j}$  microstates where residue  $j$  was folded ( $F_j$ ) and the other consisted of all other  $N_{NF_j}$  microstates where residue  $j$  was not folded ( $NF_j$ ). Formally, for each residue  $j$  it was written:

$$F_j = \{ \forall \text{ microstates } s \in S \mid \text{residue } j \text{ is folded in microstate } s \}, \quad (\text{S8})$$

$$NF_j = \{ \forall \text{ microstates } t \in S \mid \text{residue } j \text{ is not folded in microstate } t \}. \quad (\text{S9})$$

*Principal components analysis of thermodynamic environment space*

Principal components analysis (PCA) is a commonly used linear method for subspace decomposition (16, 17). In favorable cases, PCA can reveal latent organization in multidimensional data. Briefly, given a  $p \times n$  data matrix  $A$  in row-observation form (each of the  $n$  columns is a “dimension” and each of the  $p$  rows is an “observation” from an experiment, e.g. a four dimensional thermodynamic vector from COREX/BEST), the data are first centered by removing the mean value of each dimension from the original data, giving a new matrix  $\hat{A}$ . Second, the sample covariance matrix for  $\hat{A}$  is created by the formula,

$$\text{cov}(\hat{A}) = \frac{1}{n-1} \hat{A}^T \hat{A} . \quad (\text{S10})$$

This sample covariance matrix is square, symmetric and positive semi-definite. Each entry  $a_{ij}$  in the matrix contains the statistically defined notion of variance of a dimension when  $i$  equals  $j$ , and covariance of two dimensions when  $i$  is not equal to  $j$ . Thus, if any two axes are correlated their corresponding  $a_{ij}$  entries in the sample covariance matrix will be non-zero, and zero otherwise. PCA maps the original data onto new coordinates, through a rotation matrix, such that the sample covariance matrix of the new points is diagonal. Hence, the new axes are uncorrelated (in fact they are an orthogonal subspace of  $\mathfrak{R}^n$ ). This data transformation allowed us to invoke the orthogonal decomposition theorem (17) to dissect the difference of two coordinates in terms of the orthogonal parts of their difference vector. Or, in other words one could “move” from point to point in the new coordinate space and explain the difference between the two points as sums of vectors that were all at right angles (uncorrelated). Furthermore, because the rotation matrix allowed a mapping from TE space to PCA space and back, elucidation of the biophysical changes underlying changes in TE space was made possible. This last point is emphasized because it allowed interpretation of protein thermodynamics in terms of the physical quantities of solvent exposed surface area and conformational entropy embodied in the COREX/BEST energy function (Eq. S4, above).

PCA was performed using the  $R$  function princomp (<http://www.r-project.org>) on the four-dimensional energetic data computed from the 120 native state ensembles of the protein database mentioned above. This function performed the following tasks: the energetic data was put into mean deviation form (*i.e.* centered in the original coordinate system), the eigenvector decomposition for its covariance matrix was calculated, and the data were projected onto the new orthonormal basis by multiplying the original data by the eigenvectors of the original sample covariance matrix.

## References

1. Hilser, V. J., and E. Freire. 1996. Structure-based calculation of the equilibrium folding pathway of proteins. Correlation with hydrogen exchange protection factors. *Journal of molecular biology* 262:756-772.
2. Hilser, V. J., E. B. Garcia-Moreno, T. G. Oas, G. Kapp, and S. T. Whitten. 2006. A statistical thermodynamic model of the protein ensemble. *Chemical reviews* 106:1545-1558.
3. Vertrees, J., P. Barritt, S. Whitten, and V. J. Hilser. 2005. COREX/BEST server: a web browser-based program that calculates regional stability variations within protein structures. *Bioinformatics (Oxford, England)* 21:3318-3319.
4. Babu, C. R., V. J. Hilser, and A. J. Wand. 2004. Direct access to the cooperative substructure of proteins and the protein ensemble via cold denaturation. *Nature structural & molecular biology* 11:352-357.
5. Pan, H., J. C. Lee, and V. J. Hilser. 2000. Binding sites in *Escherichia coli* dihydrofolate reductase communicate by modulating the conformational ensemble. *Proceedings of the National Academy of Sciences of the United States of America* 97:12020-12025.
6. Whitten, S. T., E. B. Garcia-Moreno, and V. J. Hilser. 2005. Local conformational fluctuations can modulate the coupling between proton binding and global structural transitions in proteins. *Proceedings of the National Academy of Sciences of the United States of America* 102:4282-4287.
7. Wooll, J. O., J. O. Wrabl, and V. J. Hilser. 2000. Ensemble modulation as an origin of denaturant-independent hydrogen exchange in proteins. *Journal of molecular biology* 301:247-256.
8. Larson, S. A., and V. J. Hilser. 2004. Analysis of the "thermodynamic information content" of a *Homo sapiens* structural database reveals hierarchical thermodynamic organization. *Protein Sci* 13:1787-1801.
9. Vertrees, J. 2008. A thermodynamic definition of protein folds. In Department of Biochemistry and Molecular Biology. University of Texas Medical Branch, Galveston.
10. Frishman, D., and P. Argos. 1995. Knowledge-based protein secondary structure assignment. *Proteins* 23:566-579.
11. D'Aquino, J. A., J. Gomez, V. J. Hilser, K. H. Lee, L. M. Amzel, and E. Freire. 1996. The magnitude of the backbone conformational entropy change in protein folding. *Proteins* 25:143-156.
12. Murphy, K. P., and S. J. Gill. 1991. Solid model compounds and the thermodynamics of protein unfolding. *Journal of molecular biology* 222:699-709.
13. Murphy, K. P., P. L. Privalov, and S. J. Gill. 1990. Common features of protein unfolding and dissolution of hydrophobic compounds. *Science (New York, N.Y)* 247:559-561.
14. Xie, D., and E. Freire. 1994. Structure based prediction of protein folding intermediates. *Journal of molecular biology* 242:62-80.
15. Murphy, K. P., and E. Freire. 1992. Thermodynamics of structural stability and cooperative folding behavior in proteins. *Advances in protein chemistry* 43:313-361.
16. Manly, B. F. J. 1986. *Multivariate statistical methods: a primer*. Chapman and Hall, New York.
17. Lay, D. C. 2003. *Linear Algebra and its Applications, Third Edition*. Pearson, Addison-Wesley.

Table S1. Native state thermodynamic descriptors for 120 human proteins, computed by COREX / BEST. Values are in kcal / mol at 25.0 °C.

| pdb_id | chain_id | residue_name | residue_number | secondary_structure | $\Delta G$ | $\Delta H_{ap}$ | $\Delta H_{pol}$ | $TAS_{conf}$ |
|--------|----------|--------------|----------------|---------------------|------------|-----------------|------------------|--------------|
| 1A17   | A        | PRO          | 19             | C                   | -4.088234  | 4.229515        | -4.258223        | -0.638051    |
| 1A17   | A        | PRO          | 20             | C                   | -4.088234  | 4.229515        | -4.258223        | -0.638051    |
| 1A17   | A        | ALA          | 21             | C                   | -4.088234  | 4.229515        | -4.258223        | -0.638051    |
| 1A17   | A        | ASP          | 22             | H                   | -4.088234  | 4.229515        | -4.258223        | -0.638051    |
| 1A17   | A        | GLY          | 23             | H                   | -4.395059  | 4.491100        | -5.243721        | -1.389826    |
| 1A17   | A        | ALA          | 24             | H                   | -4.930556  | 6.148327        | -8.159145        | -3.874544    |
| 1A17   | A        | LEU          | 25             | H                   | -5.552081  | 6.798558        | -9.171590        | -4.644301    |
| 1A17   | A        | LYS          | 26             | H                   | -6.610406  | 6.526865        | -9.689133        | -4.016628    |
| 1A17   | A        | ARG          | 27             | H                   | -10.027918 | 8.392879        | -13.102609       | -3.592472    |
| 1A17   | A        | ALA          | 28             | H                   | -11.547228 | 8.870021        | -15.155323       | -3.819945    |
| 1A17   | A        | GLU          | 29             | H                   | -11.993160 | 7.697427        | -17.671230       | -4.980113    |
| 1A17   | A        | GLU          | 30             | H                   | -12.011963 | 7.615513        | -17.562346       | -4.923039    |
| 1A17   | A        | LEU          | 31             | H                   | -13.139681 | 11.366618       | -16.369216       | -4.036027    |
| 1A17   | A        | LYS          | 32             | H                   | -13.065989 | 11.154140       | -16.482125       | -4.050610    |
| 1A17   | A        | THR          | 33             | H                   | -12.474828 | 8.330376        | -15.708499       | -2.938021    |
| 1A17   | A        | GLN          | 34             | H                   | -12.520082 | 8.240084        | -15.716579       | -2.939194    |
| 1A17   | A        | ALA          | 35             | H                   | -12.529733 | 8.194302        | -15.650048       | -2.894527    |
| 1A17   | A        | ASN          | 36             | H                   | -12.321728 | 9.443244        | -15.752733       | -3.655399    |
| 1A17   | A        | ASP          | 37             | H                   | -11.488114 | 11.147777       | -13.235503       | -3.364622    |
| 1A17   | A        | TYR          | 38             | H                   | -11.360736 | 11.688554       | -12.606813       | -3.100844    |
| 1A17   | A        | PHE          | 39             | H                   | -10.876461 | 9.348967        | -12.322829       | -2.266623    |
| 1A17   | A        | LYS          | 40             | H                   | -10.486195 | 8.822022        | -13.471065       | -3.218164    |
| 1A17   | A        | ALA          | 41             | H                   | -10.184868 | 8.470210        | -14.085092       | -3.860546    |
| 1A17   | A        | LYS          | 42             | C                   | -10.185516 | 8.233633        | -14.301024       | -3.929296    |
| 1A17   | A        | ASP          | 43             | C                   | -10.201176 | 8.133810        | -14.393417       | -3.984509    |
| 1A17   | A        | TYR          | 44             | H                   | -10.316673 | 8.281318        | -14.884580       | -4.494765    |
| 1A17   | A        | GLU          | 45             | H                   | -10.338378 | 8.593204        | -14.698058       | -4.459103    |
| 1A17   | A        | ASN          | 46             | H                   | -10.677223 | 9.913595        | -14.192282       | -4.176209    |
| 1A17   | A        | ALA          | 47             | H                   | -10.803762 | 10.161601       | -13.986717       | -4.195451    |
| 1A17   | A        | ILE          | 48             | H                   | -10.827877 | 10.138555       | -14.007947       | -4.264436    |
| 1A17   | A        | LYS          | 49             | H                   | -10.831987 | 10.124365       | -14.018560       | -4.284319    |
| 1A17   | A        | PHE          | 50             | H                   | -11.727084 | 13.469695       | -13.614216       | -4.915525    |
| 1A17   | A        | TYR          | 51             | H                   | -14.821048 | 17.123920       | -15.372153       | -3.949987    |
| 1A17   | A        | SER          | 52             | H                   | -12.833865 | 9.081237        | -15.253298       | -3.117168    |
| 1A17   | A        | GLN          | 53             | H                   | -11.541239 | 10.556718       | -11.257822       | -1.702637    |
| 1A17   | A        | ALA          | 54             | H                   | -11.367847 | 10.695685       | -10.998516       | -1.468322    |
| 1A17   | A        | ILE          | 55             | H                   | -10.939290 | 10.498511       | -12.351790       | -2.674115    |
| 1A17   | A        | GLU          | 56             | H                   | -9.983440  | 9.274290        | -12.959182       | -3.973646    |
| 1A17   | A        | LEU          | 57             | H                   | -9.969631  | 9.274998        | -12.954372       | -3.941211    |
| 1A17   | A        | ASN          | 58             | T                   | -9.959467  | 9.096937        | -13.023144       | -3.911031    |
| 1A17   | A        | PRO          | 59             | T                   | -9.892907  | 8.865811        | -12.699751       | -3.511876    |
| 1A17   | A        | SER          | 60             | T                   | -9.945343  | 8.739812        | -12.620518       | -3.485597    |
| 1A17   | A        | ASN          | 61             | T                   | -10.768209 | 8.057163        | -11.148776       | -1.044528    |
| 1A17   | A        | ALA          | 62             | H                   | -10.842748 | 7.907113        | -10.850633       | -0.823343    |
| 1A17   | A        | ILE          | 63             | H                   | -11.096568 | 7.773438        | -10.180317       | -0.374679    |
| 1A17   | A        | TYR          | 64             | H                   | -13.193237 | 13.100452       | -15.448571       | -4.271119    |
| 1A17   | A        | TYR          | 65             | H                   | -14.443991 | 17.585250       | -15.599794       | -4.954800    |
| 1A17   | A        | GLY          | 66             | H                   | -15.006748 | 17.026488       | -15.653388       | -4.189998    |
| 1A17   | A        | ASN          | 67             | H                   | -15.815305 | 13.332556       | -20.208326       | -5.163681    |
| 1A17   | A        | ARG          | 68             | H                   | -15.937090 | 12.742439       | -21.058928       | -5.581323    |
| 1A17   | A        | SER          | 69             | H                   | -15.326597 | 15.289824       | -15.583607       | -2.931261    |
| 1A17   | A        | LEU          | 70             | H                   | -13.837566 | 18.141365       | -13.326423       | -4.071611    |
| 1A17   | A        | ALA          | 71             | H                   | -12.695262 | 18.296939       | -12.651233       | -4.877062    |
| 1A17   | A        | TYR          | 72             | H                   | -11.953098 | 16.959377       | -11.776407       | -4.145421    |
| 1A17   | A        | LEU          | 73             | H                   | -9.214913  | 10.962293       | -7.693840        | -1.661507    |
| 1A17   | A        | ARG          | 74             | H                   | -9.167536  | 10.942407       | -7.786291        | -1.616574    |
| 1A17   | A        | THR          | 75             | H                   | -7.714858  | 9.226388        | -9.836964        | -3.878166    |
| 1A17   | A        | GLU          | 76             | C                   | -7.267304  | 9.699423        | -9.820404        | -4.312219    |
| 1A17   | A        | CYS          | 77             | C                   | -7.256069  | 9.734204        | -9.816781        | -4.289060    |
| 1A17   | A        | TYR          | 78             | H                   | -7.277666  | 9.692001        | -9.898401        | -4.387673    |
| 1A17   | A        | GLY          | 79             | H                   | -7.208081  | 9.310570        | -9.803963        | -4.065870    |
| 1A17   | A        | TYR          | 80             | H                   | -7.498347  | 9.466380        | -9.669469        | -4.049918    |
| 1A17   | A        | ALA          | 81             | H                   | -8.399012  | 7.121575        | -9.223916        | -1.737536    |
| 1A17   | A        | LEU          | 82             | H                   | -8.480046  | 6.448983        | -9.178047        | -1.539171    |
| 1A17   | A        | GLY          | 83             | H                   | -8.482279  | 6.422613        | -9.175348        | -1.537788    |
| 1A17   | A        | ASP          | 84             | H                   | -10.693062 | 8.969510        | -14.594901       | -4.155851    |
| 1A17   | A        | ALA          | 85             | H                   | -11.027437 | 8.701850        | -14.745479       | -4.142139    |
| 1A17   | A        | THR          | 86             | H                   | -11.018802 | 10.800450       | -13.563478       | -4.101301    |
| 1A17   | A        | ARG          | 87             | H                   | -10.967835 | 12.418411       | -12.615887       | -3.999479    |
| 1A17   | A        | ALA          | 88             | H                   | -10.777298 | 12.347342       | -11.978758       | -3.423974    |
| 1A17   | A        | ILE          | 89             | H                   | -10.268371 | 10.566458       | -11.187145       | -2.473943    |
| 1A17   | A        | GLU          | 90             | H                   | -8.777502  | 8.420470        | -11.778830       | -3.959060    |
| 1A17   | A        | LEU          | 91             | H                   | -8.674386  | 9.106660        | -11.649479       | -4.079680    |
| 1A17   | A        | ASP          | 92             | T                   | -8.595617  | 9.468046        | -11.402458       | -3.960660    |
| 1A17   | A        | LYS          | 93             | T                   | -8.593483  | 9.484269        | -11.396306       | -3.956006    |
| 1A17   | A        | LYS          | 94             | T                   | -8.582116  | 9.632852        | -11.239636       | -3.887955    |
| 1A17   | A        | TYR          | 95             | T                   | -9.222765  | 12.368581       | -10.088223       | -3.495899    |

|      |   |     |     |   |            |           |            |           |
|------|---|-----|-----|---|------------|-----------|------------|-----------|
| 1A17 | A | ILE | 96  | H | -9.563242  | 12.149004 | -9.266223  | -2.560799 |
| 1A17 | A | LYS | 97  | H | -10.216843 | 12.287275 | -8.324252  | -1.439083 |
| 1A17 | A | GLY | 98  | H | -10.324378 | 12.208146 | -7.949149  | -1.293446 |
| 1A17 | A | TYR | 99  | H | -13.307592 | 17.929504 | -14.195065 | -5.121068 |
| 1A17 | A | TYR | 100 | H | -14.182042 | 18.191242 | -15.371451 | -5.726600 |
| 1A17 | A | ARG | 101 | H | -16.105558 | 15.368904 | -19.131676 | -5.162957 |
| 1A17 | A | ARG | 102 | H | -15.126754 | 11.482142 | -18.126516 | -3.871202 |
| 1A17 | A | ALA | 103 | H | -14.210495 | 10.671313 | -15.886021 | -2.536827 |
| 1A17 | A | ALA | 104 | H | -13.478539 | 9.879416  | -14.329275 | -1.681489 |
| 1A17 | A | SER | 105 | H | -12.834209 | 11.504410 | -15.336116 | -3.637266 |
| 1A17 | A | ASN | 106 | H | -10.538561 | 11.226804 | -13.533015 | -5.071582 |
| 1A17 | A | MET | 107 | H | -8.503859  | 8.964730  | -9.914900  | -3.201073 |
| 1A17 | A | ALA | 108 | H | -8.475762  | 9.026136  | -9.912745  | -3.141613 |
| 1A17 | A | LEU | 109 | H | -8.472710  | 9.030683  | -9.919199  | -3.133458 |
| 1A17 | A | GLY | 110 | C | -8.471014  | 9.033100  | -9.932383  | -3.135943 |
| 1A17 | A | LYS | 111 | C | -8.486033  | 8.985380  | -9.839158  | -3.082180 |
| 1A17 | A | PHE | 112 | H | -10.142534 | 10.474122 | -10.535181 | -2.211954 |
| 1A17 | A | ARG | 113 | H | -10.708664 | 10.032674 | -11.697195 | -2.101353 |
| 1A17 | A | ALA | 114 | H | -10.861416 | 10.065637 | -11.846479 | -2.263008 |
| 1A17 | A | ALA | 115 | H | -10.982799 | 10.037453 | -11.197960 | -1.849092 |
| 1A17 | A | LEU | 116 | H | -11.225646 | 8.576422  | -10.213330 | -0.535815 |
| 1A17 | A | ARG | 117 | H | -11.233886 | 8.495207  | -10.170934 | -0.502801 |
| 1A17 | A | ASP | 118 | H | -13.998629 | 9.712871  | -15.086479 | -1.656285 |
| 1A17 | A | TYR | 119 | H | -14.056722 | 16.874018 | -12.001393 | -2.017949 |
| 1A17 | A | GLU | 120 | H | -9.633674  | 10.734616 | -10.640854 | -3.367415 |
| 1A17 | A | THR | 121 | H | -8.044326  | 11.531850 | -8.588353  | -3.754356 |
| 1A17 | A | VAL | 122 | H | -7.981076  | 11.689777 | -8.531135  | -3.646410 |
| 1A17 | A | VAL | 123 | H | -7.909530  | 11.359240 | -8.525362  | -3.387969 |
| 1A17 | A | LYS | 124 | H | -7.555027  | 9.003771  | -7.427987  | -1.801218 |
| 1A17 | A | VAL | 125 | H | -7.400753  | 8.621166  | -8.228149  | -2.251249 |
| 1A17 | A | LYS | 126 | T | -7.035974  | 7.106397  | -9.722675  | -3.353395 |
| 1A17 | A | PRO | 127 | T | -6.771894  | 6.145401  | -9.888315  | -3.184543 |
| 1A17 | A | HIS | 128 | T | -6.742624  | 6.098909  | -9.865969  | -3.114525 |
| 1A17 | A | ASP | 129 | T | -6.814410  | 6.095149  | -10.353882 | -3.533458 |
| 1A17 | A | LYS | 130 | H | -6.871767  | 5.936146  | -10.305348 | -3.513788 |
| 1A17 | A | ASP | 131 | H | -7.254937  | 4.959021  | -9.991842  | -2.695443 |
| 1A17 | A | ALA | 132 | H | -8.349766  | 6.131887  | -9.376701  | -1.725121 |
| 1A17 | A | LYS | 133 | H | -10.342388 | 7.769047  | -14.569345 | -4.007043 |
| 1A17 | A | MET | 134 | H | -10.387548 | 7.900142  | -14.716187 | -4.241077 |
| 1A17 | A | LYS | 135 | H | -10.978646 | 9.804288  | -14.847609 | -4.998946 |
| 1A17 | A | TYR | 136 | H | -13.084335 | 11.359802 | -16.460652 | -3.999669 |
| 1A17 | A | GLN | 137 | H | -12.416113 | 8.191144  | -17.294264 | -4.207934 |
| 1A17 | A | GLU | 138 | H | -11.761653 | 8.120215  | -15.107181 | -3.154286 |
| 1A17 | A | CYS | 139 | H | -11.631948 | 8.491237  | -14.667195 | -2.953270 |
| 1A17 | A | ASN | 140 | H | -10.077681 | 8.986479  | -12.947792 | -3.804641 |
| 1A17 | A | LYS | 141 | H | -8.814791  | 8.654974  | -11.703792 | -4.125861 |
| 1A17 | A | ILE | 142 | H | -8.805188  | 8.695829  | -11.709409 | -4.111938 |
| 1A17 | A | VAL | 143 | H | -8.801239  | 8.691315  | -11.712977 | -4.097353 |
| 1A17 | A | LYS | 144 | H | -8.796854  | 8.672249  | -11.716137 | -4.074780 |
| 1A17 | A | GLN | 145 | H | -8.817476  | 8.597309  | -11.785016 | -4.115137 |
| 1A17 | A | LYS | 146 | H | -8.267341  | 7.550998  | -11.228885 | -3.890239 |
| 1A17 | A | ALA | 147 | H | -7.974329  | 6.935334  | -10.650817 | -3.136471 |
| 1A17 | A | PHE | 148 | H | -7.913402  | 6.797584  | -10.505852 | -2.883232 |
| 1A17 | A | GLU | 149 | H | -7.840064  | 6.573380  | -10.220699 | -2.506056 |
| 1A17 | A | ARG | 150 | H | -7.628817  | 6.161862  | -10.468006 | -2.593128 |
| 1A17 | A | ALA | 151 | H | -7.237597  | 4.874735  | -11.076848 | -3.224339 |
| 1A17 | A | ILE | 152 | H | -7.303786  | 4.723560  | -11.275055 | -3.384789 |
| 1A17 | A | ALA | 153 | H | -7.314895  | 4.663271  | -11.378499 | -3.461871 |
| 1A17 | A | GLY | 154 | H | -7.335843  | 4.636940  | -11.550649 | -3.621428 |
| 1A17 | A | ASP | 155 | H | -7.454216  | 4.494339  | -11.676130 | -3.802321 |
| 1A17 | A | GLU | 156 | H | -7.880585  | 5.428160  | -18.392861 | -8.967991 |
| 1A17 | A | HIS | 157 | H | -7.277396  | 5.157786  | -18.168969 | -9.273007 |
| 1A17 | A | LYS | 158 | H | -7.103023  | 5.192358  | -18.072566 | -9.227468 |
| 1A17 | A | ARG | 159 | H | -7.106515  | 5.206398  | -18.116572 | -9.279044 |
| 1A17 | A | SER | 160 | H | -5.151071  | 4.353920  | -12.920383 | -7.461410 |
| 1A17 | A | VAL | 161 | H | -4.034144  | 4.074604  | -10.938041 | -6.681879 |
| 1A17 | A | VAL | 162 | H | -3.456483  | 3.815106  | -10.125767 | -6.344303 |
| 1A17 | A | ASP | 163 | H | -3.450138  | 3.794814  | -10.103499 | -6.293541 |
| 1A17 | A | SER | 164 | H | -2.769826  | 2.900624  | -8.288102  | -5.199539 |
| 1A17 | A | LEU | 165 | C | -2.036441  | 2.478622  | -6.661099  | -4.491124 |
| 1A17 | A | ASP | 166 | T | -1.280662  | 1.605998  | -5.777555  | -4.111708 |
| 1A17 | A | ILE | 167 | T | -1.185602  | 1.596833  | -5.812112  | -4.025543 |
| 1A17 | A | GLU | 168 | T | -1.145099  | 1.576089  | -5.850256  | -3.970007 |
| 1A17 | A | SER | 169 | T | -1.103814  | 1.553536  | -5.823486  | -3.868669 |
| 1A17 | A | MET | 170 | T | -0.752962  | 1.115471  | -4.664708  | -2.946069 |
| 1A17 | A | THR | 171 | C | 0.719721   | 0.776795  | -1.669004  | -2.386563 |
| 1A17 | A | ILE | 172 | C | 1.288819   | 1.099277  | -2.555069  | -3.547982 |
| 1A17 | A | GLU | 173 | C | 1.594454   | 1.932941  | -3.734511  | -4.769777 |
| 1A17 | A | ASP | 174 | C | 1.709211   | 2.374302  | -4.386279  | -5.289300 |
| 1A17 | A | GLU | 175 | C | 1.709211   | 2.374302  | -4.386279  | -5.289300 |
| 1A17 | A | TYR | 176 | C | 1.709211   | 2.374302  | -4.386279  | -5.289300 |

|      |   |     |     |   |            |           |            |           |
|------|---|-----|-----|---|------------|-----------|------------|-----------|
| 1A17 | A | SER | 177 | C | 1.709211   | 2.374302  | -4.386279  | -5.289300 |
| 1A3K | A | LEU | 114 | C | -3.795896  | 5.319212  | -5.095889  | -2.303290 |
| 1A3K | A | ILE | 115 | T | -3.795896  | 5.319212  | -5.095889  | -2.303290 |
| 1A3K | A | VAL | 116 | T | -3.795896  | 5.319212  | -5.095889  | -2.303290 |
| 1A3K | A | PRO | 117 | T | -3.795896  | 5.319212  | -5.095889  | -2.303290 |
| 1A3K | A | TYR | 118 | E | -6.491379  | 9.279862  | -8.171481  | -3.449300 |
| 1A3K | A | ASN | 119 | E | -7.804469  | 10.865694 | -10.604788 | -4.533642 |
| 1A3K | A | LEU | 120 | E | -7.444147  | 11.334876 | -9.071765  | -4.023622 |
| 1A3K | A | PRO | 121 | E | -5.095300  | 8.203109  | -7.644930  | -4.147609 |
| 1A3K | A | LEU | 122 | T | -4.959394  | 8.623210  | -7.635319  | -4.158951 |
| 1A3K | A | PRO | 123 | T | -4.781427  | 8.320754  | -7.782229  | -4.076167 |
| 1A3K | A | GLY | 124 | T | -4.718671  | 8.391703  | -7.807964  | -4.056232 |
| 1A3K | A | GLY | 125 | T | -4.722423  | 8.370757  | -7.803621  | -4.055320 |
| 1A3K | A | VAL | 126 | C | -5.160953  | 8.617991  | -8.004681  | -3.949571 |
| 1A3K | A | VAL | 127 | T | -5.362237  | 7.956907  | -8.169204  | -3.847171 |
| 1A3K | A | PRO | 128 | T | -6.059217  | 9.074551  | -8.100711  | -3.866274 |
| 1A3K | A | ARG | 129 | T | -8.137297  | 10.174868 | -9.854334  | -3.518732 |
| 1A3K | A | MET | 130 | E | -9.705483  | 13.757996 | -10.687737 | -3.947508 |
| 1A3K | A | LEU | 131 | E | -10.460622 | 16.937303 | -11.601635 | -4.819429 |
| 1A3K | A | ILE | 132 | E | -9.229132  | 14.632217 | -10.418945 | -4.655457 |
| 1A3K | A | THR | 133 | E | -8.608347  | 13.312379 | -10.798529 | -4.775957 |
| 1A3K | A | ILE | 134 | E | -8.383501  | 13.465199 | -10.511994 | -4.615287 |
| 1A3K | A | LEU | 135 | E | -8.322775  | 13.325541 | -10.662215 | -4.616365 |
| 1A3K | A | GLY | 136 | E | -8.070298  | 12.118381 | -10.907501 | -4.488873 |
| 1A3K | A | THR | 137 | E | -7.037423  | 9.296349  | -9.958427  | -4.139565 |
| 1A3K | A | VAL | 138 | E | -6.029658  | 8.811935  | -8.672984  | -3.986773 |
| 1A3K | A | LYS | 139 | T | -5.224603  | 7.600741  | -8.939818  | -4.416015 |
| 1A3K | A | PRO | 140 | T | -5.212891  | 7.597870  | -8.987810  | -4.416322 |
| 1A3K | A | ASN | 141 | T | -5.214509  | 7.591341  | -8.981618  | -4.416791 |
| 1A3K | A | ALA | 142 | T | -5.238136  | 7.540083  | -8.949327  | -4.430398 |
| 1A3K | A | ASN | 143 | C | -5.383201  | 7.205857  | -9.097714  | -4.560165 |
| 1A3K | A | ARG | 144 | B | -7.523562  | 7.603966  | -11.420932 | -4.436856 |
| 1A3K | A | ILE | 145 | E | -10.402238 | 11.696306 | -13.284884 | -4.596369 |
| 1A3K | A | ALA | 146 | E | -12.378804 | 13.709511 | -15.201659 | -4.524811 |
| 1A3K | A | LEU | 147 | E | -13.040688 | 15.310277 | -15.250658 | -4.643413 |
| 1A3K | A | ASP | 148 | E | -13.865018 | 18.357578 | -15.155261 | -4.839122 |
| 1A3K | A | PHE | 149 | E | -12.945424 | 14.304555 | -16.966773 | -5.738621 |
| 1A3K | A | GLN | 150 | E | -10.471578 | 7.692527  | -17.040152 | -5.870469 |
| 1A3K | A | ARG | 151 | E | -8.978925  | 8.154080  | -14.475898 | -5.366944 |
| 1A3K | A | GLY | 152 | T | -8.692327  | 8.121797  | -14.215129 | -5.122898 |
| 1A3K | A | ASN | 153 | T | -8.691957  | 8.125920  | -14.215705 | -5.122671 |
| 1A3K | A | ASP | 154 | E | -8.692315  | 8.122874  | -14.213729 | -5.122160 |
| 1A3K | A | VAL | 155 | E | -8.722046  | 8.149532  | -14.068452 | -5.083639 |
| 1A3K | A | ALA | 156 | E | -9.259059  | 8.083038  | -13.798547 | -4.730723 |
| 1A3K | A | PHE | 157 | E | -12.987831 | 15.241604 | -15.221014 | -4.800110 |
| 1A3K | A | HIS | 158 | E | -14.324500 | 19.808475 | -15.276576 | -4.946153 |
| 1A3K | A | PHE | 159 | E | -14.514966 | 20.883996 | -14.739979 | -4.956236 |
| 1A3K | A | ASN | 160 | E | -15.133180 | 18.100939 | -18.258242 | -5.572586 |
| 1A3K | A | PRO | 161 | E | -14.903597 | 16.101901 | -19.281625 | -5.789644 |
| 1A3K | A | ARG | 162 | E | -13.352425 | 11.806010 | -18.930910 | -5.983399 |
| 1A3K | A | PHE | 163 | E | -8.027973  | 9.199743  | -12.768528 | -5.648470 |
| 1A3K | A | ASN | 164 | E | -4.872219  | 3.937081  | -10.255917 | -4.690588 |
| 1A3K | A | GLU | 165 | E | -4.861927  | 3.969055  | -10.287212 | -4.687010 |
| 1A3K | A | ASN | 166 | T | -4.844667  | 4.053957  | -10.284126 | -4.661402 |
| 1A3K | A | ASN | 167 | T | -4.844386  | 4.057044  | -10.284562 | -4.660921 |
| 1A3K | A | ARG | 168 | E | -4.847131  | 4.033229  | -10.272991 | -4.656284 |
| 1A3K | A | ARG | 169 | E | -6.670051  | 6.553817  | -10.875676 | -4.041486 |
| 1A3K | A | VAL | 170 | E | -6.938089  | 6.991697  | -10.194263 | -3.790508 |
| 1A3K | A | ILE | 171 | E | -9.326159  | 10.815131 | -11.368334 | -3.696593 |
| 1A3K | A | VAL | 172 | E | -10.783823 | 13.658498 | -13.237979 | -4.270838 |
| 1A3K | A | CYS | 173 | E | -11.073199 | 13.834241 | -14.327704 | -4.922213 |
| 1A3K | A | ASN | 174 | E | -11.112991 | 12.252412 | -16.203557 | -5.614167 |
| 1A3K | A | THR | 175 | E | -9.223704  | 8.462186  | -14.326496 | -5.261566 |
| 1A3K | A | LYS | 176 | E | -5.947568  | 6.089437  | -10.773120 | -4.900806 |
| 1A3K | A | LEU | 177 | E | -4.808787  | 7.429394  | -8.978748  | -4.961091 |
| 1A3K | A | ASP | 178 | T | -4.602625  | 7.012629  | -9.386190  | -5.024554 |
| 1A3K | A | ASN | 179 | T | -4.599811  | 7.007397  | -9.405616  | -5.025025 |
| 1A3K | A | ASN | 180 | E | -4.599828  | 7.006780  | -9.405923  | -5.025117 |
| 1A3K | A | TRP | 181 | E | -4.663885  | 7.111992  | -9.250788  | -5.039061 |
| 1A3K | A | GLY | 182 | C | -5.318191  | 6.006352  | -10.416996 | -5.173756 |
| 1A3K | A | ARG | 183 | C | -7.721742  | 5.979381  | -13.657783 | -5.153497 |
| 1A3K | A | GLU | 184 | C | -9.228349  | 6.805896  | -15.725519 | -5.536398 |
| 1A3K | A | GLU | 185 | E | -10.587760 | 6.956597  | -18.006447 | -5.728005 |
| 1A3K | A | ARG | 186 | E | -10.921053 | 7.379002  | -17.661877 | -5.302393 |
| 1A3K | A | GLN | 187 | E | -10.236674 | 12.714909 | -12.378165 | -4.339998 |
| 1A3K | A | SER | 188 | C | -9.775184  | 15.078949 | -10.783096 | -4.250115 |
| 1A3K | A | VAL | 189 | C | -9.599902  | 15.916924 | -10.591015 | -4.417619 |
| 1A3K | A | PHE | 190 | C | -9.587350  | 16.109135 | -10.541851 | -4.436518 |
| 1A3K | A | PRO | 191 | C | -9.259085  | 15.658638 | -10.720220 | -4.675207 |
| 1A3K | A | PHE | 192 | C | -8.445221  | 13.057083 | -10.907011 | -4.932673 |
| 1A3K | A | GLU | 193 | T | -5.790282  | 6.045689  | -10.147009 | -4.521299 |



|      |   |     |     |   |            |           |            |           |
|------|---|-----|-----|---|------------|-----------|------------|-----------|
| 1A3K | A | SER | 194 | T | -5.787793  | 6.065120  | -10.153986 | -4.522088 |
| 1A3K | A | GLY | 195 | T | -5.787277  | 6.070454  | -10.156554 | -4.522800 |
| 1A3K | A | LYS | 196 | E | -5.788003  | 6.059590  | -10.155482 | -4.522228 |
| 1A3K | A | PRO | 197 | E | -5.793308  | 6.004231  | -10.147653 | -4.518115 |
| 1A3K | A | PHE | 198 | E | -8.864590  | 11.599154 | -11.888104 | -4.829246 |
| 1A3K | A | LYS | 199 | E | -9.907095  | 12.749619 | -13.026775 | -5.324384 |
| 1A3K | A | ILE | 200 | E | -11.786423 | 16.804482 | -13.431727 | -5.040319 |
| 1A3K | A | GLN | 201 | E | -12.300214 | 17.828127 | -13.806363 | -4.944489 |
| 1A3K | A | VAL | 202 | E | -10.422328 | 14.883655 | -10.908762 | -4.019919 |
| 1A3K | A | LEU | 203 | E | -8.505736  | 12.132166 | -10.255587 | -4.318028 |
| 1A3K | A | VAL | 204 | E | -7.843078  | 11.142445 | -10.588409 | -4.533973 |
| 1A3K | A | GLU | 205 | T | -7.818789  | 11.251597 | -10.637287 | -4.558065 |
| 1A3K | A | PRO | 206 | T | -7.817914  | 11.256406 | -10.642573 | -4.559551 |
| 1A3K | A | ASP | 207 | T | -7.824948  | 11.214587 | -10.640984 | -4.566497 |
| 1A3K | A | HIS | 208 | E | -8.040055  | 10.862322 | -10.821478 | -4.669914 |
| 1A3K | A | PHE | 209 | E | -9.695423  | 13.923700 | -11.913256 | -5.145617 |
| 1A3K | A | LYS | 210 | E | -11.496415 | 14.717343 | -14.398392 | -5.355826 |
| 1A3K | A | VAL | 211 | E | -11.351782 | 10.658113 | -14.788710 | -4.200284 |
| 1A3K | A | ALA | 212 | E | -9.030805  | 7.008153  | -13.335198 | -4.135472 |
| 1A3K | A | VAL | 213 | E | -8.068458  | 7.288640  | -12.672077 | -4.447780 |
| 1A3K | A | ASN | 214 | T | -8.002931  | 7.362083  | -12.816997 | -4.490130 |
| 1A3K | A | ASP | 215 | T | -7.986694  | 7.447820  | -12.834947 | -4.495566 |
| 1A3K | A | ALA | 216 | E | -7.977272  | 7.520291  | -12.841981 | -4.505343 |
| 1A3K | A | HIS | 217 | E | -8.084513  | 7.636861  | -12.750031 | -4.579048 |
| 1A3K | A | LEU | 218 | E | -9.117249  | 8.953139  | -13.884652 | -4.836566 |
| 1A3K | A | LEU | 219 | E | -9.805716  | 11.052814 | -13.508839 | -4.802857 |
| 1A3K | A | GLN | 220 | E | -10.331180 | 11.771593 | -13.515318 | -4.965322 |
| 1A3K | A | TYR | 221 | E | -13.469401 | 16.767908 | -16.222402 | -5.749358 |
| 1A3K | A | ASN | 222 | E | -12.057633 | 10.680221 | -16.818629 | -5.338660 |
| 1A3K | A | HIS | 223 | T | -11.372993 | 10.935191 | -16.356324 | -5.429649 |
| 1A3K | A | ARG | 224 | T | -10.961308 | 11.651024 | -15.576112 | -5.307277 |
| 1A3K | A | VAL | 225 | T | -9.104039  | 10.857888 | -12.224301 | -4.705969 |
| 1A3K | A | LYS | 226 | T | -8.596855  | 9.046226  | -13.174583 | -4.880217 |
| 1A3K | A | LYS | 227 | T | -8.518600  | 9.367329  | -13.130958 | -4.896755 |
| 1A3K | A | LEU | 228 | G | -8.516867  | 9.383313  | -13.123798 | -4.892268 |
| 1A3K | A | ASN | 229 | G | -8.464065  | 9.446648  | -13.164100 | -4.898148 |
| 1A3K | A | GLU | 230 | G | -8.690437  | 8.838958  | -13.689960 | -5.003279 |
| 1A3K | A | ILE | 231 | C | -9.315271  | 11.260021 | -13.312826 | -4.968137 |
| 1A3K | A | SER | 232 | C | -9.665116  | 11.040376 | -13.709397 | -4.902751 |
| 1A3K | A | LYS | 233 | E | -9.682535  | 11.026360 | -13.701926 | -4.914190 |
| 1A3K | A | LEU | 234 | E | -9.963717  | 12.554488 | -13.299914 | -4.759341 |
| 1A3K | A | GLY | 235 | E | -9.517620  | 11.023741 | -13.605241 | -4.891670 |
| 1A3K | A | ILE | 236 | E | -9.115786  | 12.466566 | -12.256870 | -4.848455 |
| 1A3K | A | SER | 237 | E | -9.046809  | 12.264708 | -12.482357 | -4.914281 |
| 1A3K | A | GLY | 238 | E | -8.772710  | 12.710938 | -12.206021 | -5.023337 |
| 1A3K | A | ASP | 239 | T | -8.664907  | 12.982828 | -11.957829 | -5.007397 |
| 1A3K | A | ILE | 240 | E | -8.416435  | 13.208289 | -11.112321 | -4.760294 |
| 1A3K | A | ASP | 241 | E | -8.213262  | 12.434012 | -10.994498 | -4.593551 |
| 1A3K | A | LEU | 242 | E | -8.074475  | 12.133326 | -10.826763 | -4.395902 |
| 1A3K | A | THR | 243 | E | -8.146152  | 11.972668 | -10.709245 | -4.295427 |
| 1A3K | A | SER | 244 | E | -8.202436  | 11.807516 | -10.658546 | -4.241991 |
| 1A3K | A | ALA | 245 | E | -8.298841  | 11.983412 | -10.778320 | -4.341635 |
| 1A3K | A | SER | 246 | E | -7.845493  | 12.248374 | -9.909749  | -4.427681 |
| 1A3K | A | TYR | 247 | E | -5.697419  | 11.682764 | -6.116196  | -3.770879 |
| 1A3K | A | THR | 248 | E | -5.697419  | 11.682764 | -6.116196  | -3.770879 |
| 1A3K | A | MET | 249 | E | -5.697419  | 11.682764 | -6.116196  | -3.770879 |
| 1A3K | A | ILE | 250 | C | -5.697419  | 11.682764 | -6.116196  | -3.770879 |
| 1AD6 | A | VAL | 378 | C | 1.194471   | 0.859040  | -2.650295  | -3.187195 |
| 1AD6 | A | MET | 379 | C | 1.194471   | 0.859040  | -2.650295  | -3.187195 |
| 1AD6 | A | ASN | 380 | C | 1.194471   | 0.859040  | -2.650295  | -3.187195 |
| 1AD6 | A | THR | 381 | C | 1.194471   | 0.859040  | -2.650295  | -3.187195 |
| 1AD6 | A | ILE | 382 | C | 0.211472   | 1.482354  | -0.477322  | -1.475847 |
| 1AD6 | A | GLN | 383 | C | -2.555068  | 2.500004  | -4.291126  | -2.162391 |
| 1AD6 | A | GLN | 384 | H | -3.991119  | 3.410535  | -6.696200  | -3.124966 |
| 1AD6 | A | LEU | 385 | H | -6.330467  | 7.840476  | -8.652000  | -4.119013 |
| 1AD6 | A | MET | 386 | H | -8.701192  | 10.504525 | -12.385157 | -5.496427 |
| 1AD6 | A | MET | 387 | H | -9.679638  | 10.202929 | -14.407501 | -5.747898 |
| 1AD6 | A | ILE | 388 | H | -9.968234  | 9.415297  | -14.059323 | -4.579315 |
| 1AD6 | A | LEU | 389 | H | -10.010147 | 9.069834  | -13.822149 | -4.278017 |
| 1AD6 | A | ASN | 390 | H | -9.995935  | 8.827133  | -13.856487 | -4.185787 |
| 1AD6 | A | SER | 391 | H | -9.517083  | 6.136914  | -12.759684 | -2.740752 |
| 1AD6 | A | ALA | 392 | C | -8.539395  | 7.151731  | -11.649819 | -3.362270 |
| 1AD6 | A | SER | 393 | C | -8.465358  | 7.166073  | -11.879194 | -3.506481 |
| 1AD6 | A | ASP | 394 | C | -8.430820  | 7.160005  | -11.876772 | -3.446497 |
| 1AD6 | A | GLN | 395 | C | -8.347535  | 7.118754  | -11.736394 | -3.288158 |
| 1AD6 | A | PRO | 396 | C | -8.380019  | 7.430579  | -11.692305 | -3.394664 |
| 1AD6 | A | SER | 397 | C | -8.907982  | 7.490609  | -12.300187 | -3.277248 |
| 1AD6 | A | GLU | 398 | H | -9.072637  | 7.563931  | -11.898719 | -2.858028 |
| 1AD6 | A | ASN | 399 | H | -9.185908  | 7.665471  | -11.891571 | -2.943751 |
| 1AD6 | A | LEU | 400 | H | -9.657270  | 8.716641  | -13.119937 | -3.801117 |
| 1AD6 | A | ILE | 401 | H | -9.803068  | 8.522491  | -13.853782 | -4.298633 |

|      |   |     |     |   |            |           |            |           |
|------|---|-----|-----|---|------------|-----------|------------|-----------|
| 1AD6 | A | SER | 402 | H | -10.229875 | 9.301877  | -13.838746 | -4.631641 |
| 1AD6 | A | TYR | 403 | H | -14.685681 | 15.112654 | -18.016381 | -5.170195 |
| 1AD6 | A | PHE | 404 | H | -11.349080 | 10.482240 | -12.622767 | -3.119108 |
| 1AD6 | A | ASN | 405 | H | -8.761384  | 3.951817  | -11.728284 | -2.468792 |
| 1AD6 | A | ASN | 406 | H | -8.638099  | 4.040715  | -11.904034 | -2.492751 |
| 1AD6 | A | CYS | 407 | T | -8.309801  | 4.587352  | -12.526201 | -3.121107 |
| 1AD6 | A | THR | 408 | T | -7.858763  | 6.987220  | -12.058364 | -4.039776 |
| 1AD6 | A | VAL | 409 | T | -7.805268  | 7.108960  | -11.870010 | -3.891594 |
| 1AD6 | A | ASN | 410 | T | -7.923571  | 7.911233  | -11.885037 | -4.199817 |
| 1AD6 | A | PRO | 411 | H | -7.940116  | 8.183623  | -11.749608 | -4.216488 |
| 1AD6 | A | LYS | 412 | H | -8.062581  | 9.015725  | -11.329247 | -4.255606 |
| 1AD6 | A | GLU | 413 | H | -8.819241  | 8.726868  | -10.738462 | -2.666358 |
| 1AD6 | A | SER | 414 | H | -9.220426  | 8.989234  | -11.498263 | -2.976815 |
| 1AD6 | A | ILE | 415 | H | -9.330926  | 9.114484  | -11.655986 | -3.169416 |
| 1AD6 | A | LEU | 416 | H | -9.549591  | 8.581533  | -12.921590 | -3.859844 |
| 1AD6 | A | LYS | 417 | H | -10.125907 | 8.225017  | -13.804491 | -4.249540 |
| 1AD6 | A | ARG | 418 | H | -13.189879 | 9.521675  | -17.545652 | -4.066770 |
| 1AD6 | A | VAL | 419 | H | -11.060791 | 10.078400 | -11.378174 | -2.204154 |
| 1AD6 | A | LYS | 420 | H | -10.344565 | 9.240360  | -11.093720 | -2.165416 |
| 1AD6 | A | ASP | 421 | H | -10.275647 | 9.290021  | -11.147770 | -2.144733 |
| 1AD6 | A | ILE | 422 | H | -10.256541 | 9.515076  | -11.163724 | -2.201861 |
| 1AD6 | A | GLY | 423 | H | -10.223671 | 9.806022  | -11.298952 | -2.360151 |
| 1AD6 | A | TYR | 424 | H | -10.372511 | 9.804576  | -11.334010 | -2.428536 |
| 1AD6 | A | ILE | 425 | H | -11.125266 | 12.497975 | -12.262579 | -3.155032 |
| 1AD6 | A | PHE | 426 | H | -11.489139 | 14.949332 | -12.817561 | -4.160563 |
| 1AD6 | A | LYS | 427 | H | -11.153960 | 14.125634 | -12.873524 | -4.262017 |
| 1AD6 | A | GLU | 428 | H | -9.378578  | 12.246799 | -11.172973 | -4.466103 |
| 1AD6 | A | LYS | 429 | H | -9.335072  | 12.214276 | -11.086957 | -4.294872 |
| 1AD6 | A | PHE | 430 | H | -9.308165  | 12.163094 | -11.049486 | -4.182460 |
| 1AD6 | A | ALA | 431 | H | -8.138150  | 6.236444  | -8.882959  | -1.544588 |
| 1AD6 | A | LYS | 432 | H | -7.150249  | 4.024206  | -10.831905 | -2.838807 |
| 1AD6 | A | ALA | 433 | H | -5.583151  | 4.592074  | -9.708619  | -3.971321 |
| 1AD6 | A | VAL | 434 | H | -5.348127  | 4.141785  | -9.152819  | -3.301860 |
| 1AD6 | A | GLY | 435 | C | -5.166428  | 3.401891  | -8.941102  | -2.860172 |
| 1AD6 | A | GLN | 436 | C | -5.145250  | 3.322049  | -8.963012  | -2.816337 |
| 1AD6 | A | GLY | 437 | C | -5.134289  | 3.347416  | -9.007572  | -2.846883 |
| 1AD6 | A | CYS | 438 | H | -5.448300  | 2.526628  | -8.653663  | -2.023523 |
| 1AD6 | A | VAL | 439 | H | -5.737402  | 2.099992  | -9.065586  | -2.084979 |
| 1AD6 | A | GLU | 440 | H | -6.435683  | 3.807706  | -10.676630 | -3.111282 |
| 1AD6 | A | ILE | 441 | H | -6.698773  | 4.991016  | -11.377465 | -3.987272 |
| 1AD6 | A | GLY | 442 | H | -7.297375  | 6.725829  | -11.462271 | -4.519190 |
| 1AD6 | A | SER | 443 | H | -9.208106  | 6.301246  | -10.847473 | -2.089756 |
| 1AD6 | A | GLN | 444 | H | -12.090039 | 7.349220  | -16.058487 | -3.564032 |
| 1AD6 | A | ARG | 445 | H | -15.134867 | 10.845633 | -17.615520 | -3.318478 |
| 1AD6 | A | TYR | 446 | H | -14.321518 | 14.743688 | -13.217263 | -2.515765 |
| 1AD6 | A | LYS | 447 | H | -14.297120 | 14.648674 | -13.478217 | -2.597405 |
| 1AD6 | A | LEU | 448 | H | -14.087742 | 15.236421 | -14.333102 | -3.320043 |
| 1AD6 | A | GLY | 449 | H | -14.078592 | 15.270088 | -14.347780 | -3.313076 |
| 1AD6 | A | VAL | 450 | H | -14.079305 | 15.267838 | -14.343047 | -3.312490 |
| 1AD6 | A | ARG | 451 | H | -14.716457 | 16.291487 | -16.652793 | -4.899895 |
| 1AD6 | A | LEU | 452 | H | -14.755853 | 16.754338 | -16.345350 | -4.915963 |
| 1AD6 | A | TYR | 453 | H | -16.244790 | 18.845051 | -15.936073 | -3.637579 |
| 1AD6 | A | TYR | 454 | H | -16.597035 | 20.267170 | -16.873398 | -4.490719 |
| 1AD6 | A | ARG | 455 | H | -15.803084 | 14.897545 | -16.972510 | -3.456924 |
| 1AD6 | A | VAL | 456 | H | -15.224301 | 15.159731 | -15.991678 | -3.358132 |
| 1AD6 | A | MET | 457 | H | -14.550221 | 15.695575 | -16.997207 | -4.887348 |
| 1AD6 | A | GLU | 458 | H | -14.128564 | 15.157913 | -17.721625 | -5.499750 |
| 1AD6 | A | SER | 459 | H | -13.709230 | 13.628599 | -16.363617 | -4.204859 |
| 1AD6 | A | MET | 460 | H | -13.490615 | 13.374667 | -15.772373 | -3.808826 |
| 1AD6 | A | LEU | 461 | H | -13.476506 | 13.266556 | -15.851410 | -3.804019 |
| 1AD6 | A | LYS | 462 | H | -12.326916 | 7.590747  | -17.964750 | -4.580659 |
| 1AD6 | A | SER | 463 | H | -10.593393 | 7.315863  | -15.656458 | -4.719214 |
| 1AD6 | A | GLU | 464 | H | -9.805456  | 7.410839  | -12.658734 | -3.051179 |
| 1AD6 | A | GLU | 465 | H | -9.017302  | 5.693071  | -11.015539 | -1.926755 |
| 1AD6 | A | GLU | 466 | H | -8.106780  | 4.815242  | -8.956388  | -0.980260 |
| 1AD6 | A | ARG | 467 | H | -8.054515  | 4.928168  | -9.274515  | -1.161993 |
| 1AD6 | A | LEU | 468 | H | -7.986812  | 5.272274  | -9.667263  | -1.529051 |
| 1AD6 | A | SER | 469 | C | -8.006345  | 5.205963  | -9.603657  | -1.498142 |
| 1AD6 | A | ILE | 470 | C | -8.091221  | 5.226500  | -9.477410  | -1.494441 |
| 1AD6 | A | GLN | 471 | C | -8.948002  | 7.344403  | -13.002430 | -4.006214 |
| 1AD6 | A | ASN | 472 | C | -9.211239  | 8.213170  | -13.157131 | -4.525388 |
| 1AD6 | A | PHE | 473 | C | -10.175764 | 14.239502 | -11.499843 | -4.414607 |
| 1AD6 | A | SER | 474 | H | -10.129105 | 13.953887 | -11.463284 | -4.257493 |
| 1AD6 | A | LYS | 475 | H | -9.790356  | 12.003398 | -10.767223 | -3.195797 |
| 1AD6 | A | LEU | 476 | H | -9.786787  | 11.995964 | -10.779232 | -3.191246 |
| 1AD6 | A | LEU | 477 | H | -9.792796  | 11.682498 | -10.957088 | -3.203567 |
| 1AD6 | A | ASN | 478 | H | -9.958272  | 9.652230  | -11.715136 | -2.845466 |
| 1AD6 | A | ASP | 479 | C | -10.010729 | 9.576370  | -11.775011 | -2.903032 |
| 1AD6 | A | ASN | 480 | H | -10.603995 | 9.760226  | -15.052114 | -4.770306 |
| 1AD6 | A | ILE | 481 | H | -10.621556 | 9.730960  | -15.111055 | -4.839524 |
| 1AD6 | A | PHE | 482 | H | -10.915345 | 10.871672 | -14.898484 | -5.188470 |

|      |   |     |     |   |            |           |            |           |
|------|---|-----|-----|---|------------|-----------|------------|-----------|
| 1AD6 | A | HIS | 483 | H | -12.179784 | 12.256564 | -13.061448 | -3.140792 |
| 1AD6 | A | MET | 484 | H | -13.348115 | 15.437370 | -13.585541 | -3.325213 |
| 1AD6 | A | SER | 485 | H | -13.230323 | 15.683531 | -12.187682 | -2.537361 |
| 1AD6 | A | LEU | 486 | H | -12.213937 | 15.051444 | -9.616443  | -1.602136 |
| 1AD6 | A | LEU | 487 | H | -11.275342 | 14.665771 | -10.698606 | -2.953674 |
| 1AD6 | A | ALA | 488 | H | -11.215931 | 14.577541 | -11.065275 | -3.121783 |
| 1AD6 | A | CYS | 489 | H | -11.206793 | 14.544711 | -11.092516 | -3.109359 |
| 1AD6 | A | ALA | 490 | H | -11.201445 | 14.540228 | -11.075354 | -3.087106 |
| 1AD6 | A | LEU | 491 | H | -11.292736 | 14.482529 | -11.431287 | -3.373702 |
| 1AD6 | A | GLU | 492 | H | -12.224352 | 14.075007 | -13.653196 | -3.740901 |
| 1AD6 | A | VAL | 493 | H | -11.596461 | 15.552044 | -12.525678 | -4.441697 |
| 1AD6 | A | VAL | 494 | H | -11.608683 | 15.631303 | -12.547764 | -4.509760 |
| 1AD6 | A | MET | 495 | H | -11.638835 | 15.679885 | -12.684275 | -4.682349 |
| 1AD6 | A | ALA | 496 | H | -11.540607 | 14.992126 | -12.661031 | -4.331130 |
| 1AD6 | A | THR | 497 | H | -11.472993 | 14.284732 | -13.092886 | -4.323134 |
| 1AD6 | A | TYR | 498 | T | -11.476187 | 11.068288 | -14.855146 | -4.368111 |
| 1AD6 | A | SER | 499 | T | -11.041980 | 9.102694  | -13.952993 | -3.230573 |
| 1AD6 | A | ARG | 500 | T | -9.777626  | 6.231506  | -11.047437 | -1.576823 |
| 1AD6 | A | SER | 501 | T | -7.763543  | 4.028756  | -9.180141  | -1.498680 |
| 1AD6 | A | THR | 502 | C | -6.608358  | 4.297432  | -10.434748 | -3.276242 |
| 1AD6 | A | SER | 503 | T | -6.081057  | 4.247429  | -11.034730 | -4.018402 |
| 1AD6 | A | GLN | 504 | T | -6.078555  | 4.252136  | -11.040545 | -4.014049 |
| 1AD6 | A | ASN | 505 | T | -6.079172  | 4.250560  | -11.042750 | -4.017869 |
| 1AD6 | A | LEU | 506 | T | -6.113513  | 4.268265  | -11.157768 | -4.168357 |
| 1AD6 | A | ASP | 507 | T | -6.388405  | 4.227604  | -11.467910 | -4.522193 |
| 1AD6 | A | SER | 508 | T | -8.879088  | 7.111629  | -13.065936 | -3.852722 |
| 1AD6 | A | GLY | 509 | T | -9.042243  | 9.045872  | -12.565714 | -4.033288 |
| 1AD6 | A | THR | 510 | C | -9.101938  | 9.414626  | -12.470364 | -4.150141 |
| 1AD6 | A | ASP | 511 | C | -9.102689  | 9.428050  | -12.459166 | -4.150391 |
| 1AD6 | A | LEU | 512 | C | -9.188320  | 9.869545  | -11.997952 | -4.081705 |
| 1AD6 | A | SER | 513 | C | -9.691229  | 9.804991  | -10.313326 | -2.656519 |
| 1AD6 | A | PHE | 514 | C | -11.984993 | 15.171953 | -11.148292 | -2.824421 |
| 1AD6 | A | PRO | 515 | H | -11.487311 | 15.599644 | -8.628840  | -1.791281 |
| 1AD6 | A | TRP | 516 | H | -11.429219 | 15.962928 | -8.357805  | -1.713647 |
| 1AD6 | A | ILE | 517 | H | -11.007304 | 16.231989 | -9.236269  | -2.583299 |
| 1AD6 | A | LEU | 518 | H | -8.660900  | 13.400719 | -9.276262  | -4.272700 |
| 1AD6 | A | ASN | 519 | H | -8.524609  | 13.198641 | -8.960831  | -3.811163 |
| 1AD6 | A | VAL | 520 | H | -8.458714  | 13.045298 | -8.806581  | -3.567527 |
| 1AD6 | A | LEU | 521 | H | -8.208497  | 11.932490 | -8.279684  | -2.827093 |
| 1AD6 | A | ASN | 522 | C | -7.889584  | 11.279226 | -8.859282  | -3.145620 |
| 1AD6 | A | LEU | 523 | C | -8.039338  | 10.639948 | -8.870971  | -2.836165 |
| 1AD6 | A | LYS | 524 | C | -8.095269  | 10.465133 | -8.984867  | -2.916685 |
| 1AD6 | A | ALA | 525 | H | -8.131769  | 10.372956 | -9.078109  | -3.006873 |
| 1AD6 | A | PHE | 526 | H | -8.345856  | 10.609495 | -9.861289  | -3.698320 |
| 1AD6 | A | ASP | 527 | H | -9.737885  | 12.595416 | -11.637553 | -4.716199 |
| 1AD6 | A | PHE | 528 | H | -11.699276 | 18.465451 | -11.420574 | -4.495950 |
| 1AD6 | A | TYR | 529 | H | -11.164571 | 16.678258 | -10.328715 | -3.594438 |
| 1AD6 | A | LYS | 530 | H | -10.273182 | 12.350013 | -9.634350  | -2.357008 |
| 1AD6 | A | VAL | 531 | H | -10.263233 | 12.388255 | -9.636578  | -2.346680 |
| 1AD6 | A | ILE | 532 | H | -10.238687 | 12.518484 | -9.720208  | -2.405940 |
| 1AD6 | A | GLU | 533 | H | -10.043013 | 12.456593 | -10.465860 | -2.968404 |
| 1AD6 | A | SER | 534 | H | -10.100989 | 12.138636 | -10.548727 | -2.960805 |
| 1AD6 | A | PHE | 535 | H | -10.612569 | 13.568316 | -12.093599 | -4.275463 |
| 1AD6 | A | ILE | 536 | H | -9.608036  | 8.811732  | -10.762717 | -2.558999 |
| 1AD6 | A | LYS | 537 | H | -9.525282  | 8.272687  | -11.599758 | -2.871770 |
| 1AD6 | A | ALA | 538 | H | -9.341771  | 8.615166  | -12.421836 | -3.697252 |
| 1AD6 | A | GLU | 539 | T | -9.275414  | 8.758044  | -12.521704 | -3.749453 |
| 1AD6 | A | GLY | 540 | T | -9.107236  | 8.993477  | -12.291979 | -3.658013 |
| 1AD6 | A | ASN | 541 | T | -9.314518  | 9.658875  | -13.125937 | -4.307737 |
| 1AD6 | A | LEU | 542 | T | -9.218668  | 10.239468 | -12.623814 | -4.204866 |
| 1AD6 | A | THR | 543 | C | -8.950635  | 10.275865 | -12.112472 | -4.232620 |
| 1AD6 | A | ARG | 544 | H | -8.966796  | 10.216791 | -12.032017 | -4.164783 |
| 1AD6 | A | GLU | 545 | H | -9.093076  | 10.336350 | -12.143321 | -4.349010 |
| 1AD6 | A | MET | 546 | H | -9.127697  | 10.368822 | -12.196091 | -4.460424 |
| 1AD6 | A | ILE | 547 | H | -9.260939  | 10.286029 | -12.175044 | -4.558629 |
| 1AD6 | A | LYS | 548 | H | -10.855063 | 8.557498  | -12.197229 | -2.303043 |
| 1AD6 | A | HIS | 549 | H | -12.216654 | 10.638471 | -13.747201 | -2.988265 |
| 1AD6 | A | LEU | 550 | H | -13.362314 | 12.513938 | -17.300959 | -4.780515 |
| 1AD6 | A | GLU | 551 | H | -13.103422 | 11.297628 | -16.792646 | -4.173179 |
| 1AD6 | A | ARG | 552 | H | -13.123344 | 10.132902 | -17.218361 | -4.003753 |
| 1AD6 | A | CYS | 553 | H | -13.041990 | 10.957689 | -17.018668 | -4.218706 |
| 1AD6 | A | GLU | 554 | H | -12.834988 | 12.138798 | -16.571088 | -4.460579 |
| 1AD6 | A | HIS | 555 | H | -11.280186 | 12.318965 | -12.806776 | -4.023870 |
| 1AD6 | A | ARG | 556 | H | -9.868730  | 12.291692 | -9.687195  | -3.063585 |
| 1AD6 | A | ILE | 557 | H | -7.426660  | 10.044566 | -9.180531  | -3.994072 |
| 1AD6 | A | MET | 558 | H | -5.908862  | 7.956620  | -8.612678  | -4.176656 |
| 1AD6 | A | GLU | 559 | H | -5.509622  | 6.732974  | -7.043632  | -2.572618 |
| 1AD6 | A | SER | 560 | H | -5.509622  | 6.732974  | -7.043632  | -2.572618 |
| 1AD6 | A | LEU | 561 | C | -5.509622  | 6.732974  | -7.043632  | -2.572618 |
| 1AD6 | A | ALA | 562 | C | -5.509622  | 6.732974  | -7.043632  | -2.572618 |
| 1ALY | A | GLY | 116 | T | -2.433419  | 0.795202  | -8.342820  | -4.015216 |

|      |   |     |     |   |            |           |            |           |
|------|---|-----|-----|---|------------|-----------|------------|-----------|
| 1ALY | A | ASP | 117 | T | -2.433419  | 0.795202  | -8.342820  | -4.015216 |
| 1ALY | A | GLN | 118 | T | -2.433419  | 0.795202  | -8.342820  | -4.015216 |
| 1ALY | A | ASN | 119 | T | -2.433419  | 0.795202  | -8.342820  | -4.015216 |
| 1ALY | A | PRO | 120 | T | -3.109821  | 0.942349  | -9.321871  | -4.460460 |
| 1ALY | A | GLN | 121 | T | -4.861659  | 2.013606  | -12.488736 | -5.538398 |
| 1ALY | A | ILE | 122 | C | -6.028418  | 5.293124  | -13.199148 | -6.365626 |
| 1ALY | A | ALA | 123 | E | -7.615020  | 7.375118  | -14.917271 | -6.825568 |
| 1ALY | A | ALA | 124 | E | -8.770932  | 10.046372 | -12.500244 | -4.726522 |
| 1ALY | A | HIS | 125 | E | -10.558858 | 13.289023 | -12.806951 | -4.189826 |
| 1ALY | A | VAL | 126 | E | -10.477797 | 13.183995 | -13.111338 | -4.407161 |
| 1ALY | A | ILE | 127 | E | -10.392140 | 11.879791 | -14.956346 | -5.302788 |
| 1ALY | A | SER | 128 | E | -9.366368  | 8.553688  | -14.714549 | -5.281906 |
| 1ALY | A | GLU | 129 | C | -6.174876  | 5.603950  | -10.558250 | -4.438151 |
| 1ALY | A | ALA | 130 | C | -2.905714  | 3.944419  | -6.300631  | -3.672515 |
| 1ALY | A | SER | 131 | C | -2.154112  | 4.939659  | -5.510054  | -3.836649 |
| 1ALY | A | SER | 132 | C | -2.102016  | 4.992909  | -5.630116  | -3.857380 |
| 1ALY | A | LYS | 133 | C | -2.099304  | 5.004726  | -5.642757  | -3.859435 |
| 1ALY | A | THR | 134 | C | -2.099919  | 5.004080  | -5.637292  | -3.858594 |
| 1ALY | A | THR | 135 | C | -2.283624  | 5.311186  | -5.321704  | -3.868669 |
| 1ALY | A | SER | 136 | C | -3.567429  | 5.424804  | -6.730061  | -3.897102 |
| 1ALY | A | VAL | 137 | B | -5.319125  | 7.339545  | -8.103538  | -4.091987 |
| 1ALY | A | LEU | 138 | C | -8.043423  | 11.111847 | -9.578771  | -4.060010 |
| 1ALY | A | GLN | 139 | C | -11.354099 | 13.578373 | -16.400770 | -6.495113 |
| 1ALY | A | TRP | 140 | E | -9.100812  | 14.368437 | -10.987302 | -5.386923 |
| 1ALY | A | ALA | 141 | E | -6.367838  | 8.855744  | -9.898251  | -4.986208 |
| 1ALY | A | GLU | 142 | C | -5.488784  | 10.393332 | -8.495570  | -5.161690 |
| 1ALY | A | LYS | 143 | T | -5.206195  | 10.377915 | -8.342518  | -5.057245 |
| 1ALY | A | GLY | 144 | T | -5.140168  | 10.478806 | -8.366293  | -5.047375 |
| 1ALY | A | TYR | 145 | T | -5.140712  | 10.474524 | -8.364492  | -5.046976 |
| 1ALY | A | TYR | 146 | T | -5.219708  | 10.712844 | -8.146979  | -5.056004 |
| 1ALY | A | THR | 147 | E | -5.619794  | 10.584606 | -8.207549  | -4.903918 |
| 1ALY | A | MET | 148 | E | -6.470128  | 11.329805 | -8.592326  | -4.963610 |
| 1ALY | A | SER | 149 | C | -9.289103  | 10.476218 | -13.798944 | -5.119838 |
| 1ALY | A | ASN | 150 | T | -8.995461  | 9.321434  | -13.710047 | -4.978374 |
| 1ALY | A | ASN | 151 | T | -8.879455  | 9.906032  | -13.415247 | -4.934122 |
| 1ALY | A | LEU | 152 | T | -8.879127  | 9.996990  | -13.351112 | -4.921493 |
| 1ALY | A | VAL | 153 | E | -8.637283  | 10.306318 | -12.891983 | -4.923839 |
| 1ALY | A | THR | 154 | E | -5.903875  | 8.822223  | -9.758647  | -5.397095 |
| 1ALY | A | LEU | 155 | E | -5.886506  | 8.827535  | -9.849363  | -5.414825 |
| 1ALY | A | GLU | 156 | E | -5.877446  | 8.810489  | -9.924069  | -5.431297 |
| 1ALY | A | ASN | 157 | T | -5.876355  | 8.815729  | -9.930962  | -5.432478 |
| 1ALY | A | GLY | 158 | T | -5.878551  | 8.809087  | -9.921544  | -5.434077 |
| 1ALY | A | LYS | 159 | T | -7.653037  | 8.817406  | -13.506584 | -6.058278 |
| 1ALY | A | GLN | 160 | E | -8.247149  | 8.456718  | -14.489864 | -6.334845 |
| 1ALY | A | LEU | 161 | E | -9.538082  | 11.883129 | -13.686443 | -5.951261 |
| 1ALY | A | THR | 162 | E | -11.126130 | 14.013601 | -14.349779 | -5.126392 |
| 1ALY | A | VAL | 163 | E | -10.571903 | 11.358685 | -14.413527 | -4.872361 |
| 1ALY | A | LYS | 164 | C | -9.864485  | 10.617703 | -14.158874 | -5.100488 |
| 1ALY | A | ARG | 165 | C | -9.848396  | 10.712399 | -14.167404 | -5.107592 |
| 1ALY | A | GLN | 166 | C | -9.875456  | 10.512375 | -14.232751 | -5.133388 |
| 1ALY | A | GLY | 167 | E | -9.892691  | 10.533810 | -14.184944 | -5.139131 |
| 1ALY | A | LEU | 168 | E | -10.040743 | 10.612401 | -14.063757 | -5.205706 |
| 1ALY | A | TYR | 169 | E | -11.715579 | 15.376494 | -14.235731 | -5.271908 |
| 1ALY | A | TYR | 170 | E | -12.447876 | 17.941195 | -13.329755 | -5.023260 |
| 1ALY | A | ILE | 171 | E | -12.555920 | 18.399719 | -12.753226 | -4.875753 |
| 1ALY | A | TYR | 172 | E | -14.105536 | 17.702211 | -16.134365 | -4.956532 |
| 1ALY | A | ALA | 173 | E | -13.608544 | 16.480467 | -15.915476 | -4.973588 |
| 1ALY | A | GLN | 174 | E | -13.400643 | 15.898007 | -16.372873 | -5.180875 |
| 1ALY | A | VAL | 175 | E | -12.773407 | 15.275194 | -16.012781 | -5.386617 |
| 1ALY | A | THR | 176 | E | -12.726579 | 14.978754 | -16.341703 | -5.489325 |
| 1ALY | A | PHE | 177 | E | -12.750993 | 14.955964 | -16.318013 | -5.507341 |
| 1ALY | A | CYS | 178 | E | -12.837812 | 14.686120 | -16.516354 | -5.604884 |
| 1ALY | A | SER | 179 | E | -12.375240 | 11.272593 | -17.712020 | -5.580024 |
| 1ALY | A | ASN | 180 | T | -11.698372 | 8.700625  | -18.095314 | -5.644163 |
| 1ALY | A | ARG | 181 | T | -11.007795 | 8.447083  | -17.288873 | -5.493075 |
| 1ALY | A | GLU | 182 | T | -9.044914  | 6.391838  | -14.805410 | -5.093900 |
| 1ALY | A | ALA | 183 | T | -8.152775  | 5.632253  | -13.841097 | -4.706626 |
| 1ALY | A | SER | 184 | T | -7.938071  | 5.763612  | -13.771759 | -4.662320 |
| 1ALY | A | SER | 185 | T | -7.854637  | 6.455688  | -13.474087 | -4.641548 |
| 1ALY | A | GLN | 186 | T | -7.828065  | 6.771694  | -13.348906 | -4.630535 |
| 1ALY | A | ALA | 187 | T | -7.897306  | 6.947181  | -13.117905 | -4.555545 |
| 1ALY | A | PRO | 188 | E | -8.313221  | 8.530434  | -12.658802 | -4.513363 |
| 1ALY | A | PHE | 189 | E | -8.817217  | 11.843079 | -11.371270 | -4.448145 |
| 1ALY | A | ILE | 190 | E | -9.469471  | 13.562479 | -11.024496 | -4.317643 |
| 1ALY | A | ALA | 191 | E | -10.282012 | 14.380055 | -11.009723 | -3.900871 |
| 1ALY | A | SER | 192 | E | -11.347930 | 14.939403 | -13.354027 | -4.530267 |
| 1ALY | A | LEU | 193 | E | -11.646546 | 14.490182 | -14.057718 | -4.716309 |
| 1ALY | A | CYS | 194 | E | -11.678357 | 14.048675 | -14.426964 | -4.824888 |
| 1ALY | A | LEU | 195 | E | -10.140073 | 9.365881  | -15.254561 | -5.391349 |
| 1ALY | A | LYS | 196 | E | -8.819859  | 6.634069  | -14.642531 | -5.108684 |
| 1ALY | A | SER | 197 | T | -6.464208  | 5.431775  | -11.335563 | -4.639390 |

|      |   |     |     |   |            |           |            |           |
|------|---|-----|-----|---|------------|-----------|------------|-----------|
| 1ALY | A | PRO | 198 | T | -4.727457  | 5.940937  | -8.698451  | -4.479965 |
| 1ALY | A | GLY | 199 | T | -4.706851  | 5.951707  | -8.779656  | -4.483947 |
| 1ALY | A | ARG | 200 | T | -4.703934  | 5.964483  | -8.792022  | -4.484287 |
| 1ALY | A | PHE | 201 | C | -4.685575  | 6.151896  | -8.763107  | -4.482930 |
| 1ALY | A | GLU | 202 | C | -4.714948  | 6.193581  | -8.634607  | -4.475191 |
| 1ALY | A | ARG | 203 | E | -6.249259  | 9.173762  | -9.666960  | -4.513455 |
| 1ALY | A | ILE | 204 | E | -6.314603  | 12.571143 | -7.485881  | -4.127455 |
| 1ALY | A | LEU | 205 | E | -6.221651  | 13.397655 | -6.931498  | -4.046835 |
| 1ALY | A | LEU | 206 | E | -6.479894  | 14.108867 | -6.497958  | -3.804661 |
| 1ALY | A | ARG | 207 | E | -6.109276  | 11.802517 | -7.612981  | -4.017221 |
| 1ALY | A | ALA | 208 | E | -6.121026  | 11.742246 | -7.608617  | -4.018771 |
| 1ALY | A | ALA | 209 | E | -6.321114  | 10.859324 | -8.263926  | -4.169086 |
| 1ALY | A | ASN | 210 | E | -6.490311  | 9.401712  | -8.998034  | -4.264956 |
| 1ALY | A | THR | 211 | E | -6.544323  | 9.178245  | -9.008084  | -4.276037 |
| 1ALY | A | HIS | 212 | C | -8.348581  | 8.589765  | -13.250071 | -4.993979 |
| 1ALY | A | SER | 213 | T | -6.354891  | 5.495204  | -10.724788 | -4.266533 |
| 1ALY | A | SER | 214 | T | -6.090091  | 5.131227  | -11.084876 | -4.315659 |
| 1ALY | A | ALA | 215 | T | -5.891040  | 4.757851  | -11.441959 | -4.394984 |
| 1ALY | A | LYS | 216 | T | -5.876321  | 4.729525  | -11.528766 | -4.421049 |
| 1ALY | A | PRO | 217 | C | -5.880998  | 4.691890  | -11.521963 | -4.415930 |
| 1ALY | A | CYS | 218 | C | -6.218548  | 4.156223  | -12.201434 | -4.550396 |
| 1ALY | A | GLY | 219 | E | -6.571335  | 3.882211  | -12.584261 | -4.669691 |
| 1ALY | A | GLN | 220 | E | -7.933085  | 4.418434  | -14.807804 | -5.353027 |
| 1ALY | A | GLN | 221 | E | -9.977446  | 5.100538  | -17.830102 | -5.571656 |
| 1ALY | A | SER | 222 | E | -8.576252  | 12.291312 | -10.257502 | -4.464199 |
| 1ALY | A | ILE | 223 | E | -7.559416  | 11.865189 | -9.386752  | -4.448911 |
| 1ALY | A | HIS | 224 | E | -6.383328  | 11.275696 | -8.070456  | -4.370135 |
| 1ALY | A | LEU | 225 | E | -6.339535  | 11.437853 | -8.104934  | -4.370068 |
| 1ALY | A | GLY | 226 | E | -6.168997  | 11.262541 | -8.413132  | -4.460226 |
| 1ALY | A | GLY | 227 | E | -6.175917  | 11.253441 | -8.396586  | -4.460881 |
| 1ALY | A | VAL | 228 | E | -6.225088  | 11.211550 | -8.324290  | -4.461748 |
| 1ALY | A | PHE | 229 | E | -6.865179  | 11.269911 | -9.223440  | -4.663997 |
| 1ALY | A | GLU | 230 | E | -6.976561  | 10.792308 | -9.373417  | -4.726529 |
| 1ALY | A | LEU | 231 | E | -9.156804  | 13.023797 | -11.216817 | -4.581483 |
| 1ALY | A | GLN | 232 | B | -9.984793  | 11.140916 | -14.215193 | -4.969681 |
| 1ALY | A | PRO | 233 | T | -9.438720  | 10.567525 | -12.860913 | -4.380924 |
| 1ALY | A | GLY | 234 | T | -9.430468  | 10.621535 | -12.866926 | -4.385169 |
| 1ALY | A | ALA | 235 | B | -9.515361  | 10.633906 | -12.589227 | -4.259259 |
| 1ALY | A | SER | 236 | E | -9.642050  | 10.447034 | -12.373579 | -4.141607 |
| 1ALY | A | VAL | 237 | E | -9.683346  | 10.662496 | -12.063573 | -4.065415 |
| 1ALY | A | PHE | 238 | E | -11.316819 | 15.550618 | -13.150146 | -4.632082 |
| 1ALY | A | VAL | 239 | E | -10.988781 | 13.267494 | -13.815529 | -4.711276 |
| 1ALY | A | ASN | 240 | E | -10.597480 | 11.814682 | -14.422584 | -4.863099 |
| 1ALY | A | VAL | 241 | E | -9.311590  | 9.834756  | -12.799387 | -4.401767 |
| 1ALY | A | THR | 242 | T | -9.146146  | 9.393584  | -13.223041 | -4.494700 |
| 1ALY | A | ASP | 243 | T | -8.875936  | 9.519721  | -12.937636 | -4.447100 |
| 1ALY | A | PRO | 244 | G | -8.827638  | 9.553378  | -12.941462 | -4.434085 |
| 1ALY | A | SER | 245 | G | -8.835278  | 9.534797  | -12.924783 | -4.425638 |
| 1ALY | A | GLN | 246 | G | -9.117441  | 9.530020  | -13.223447 | -4.509619 |
| 1ALY | A | VAL | 247 | B | -7.352362  | 7.973461  | -10.843215 | -4.354409 |
| 1ALY | A | SER | 248 | C | -5.785527  | 5.149177  | -10.748484 | -4.664171 |
| 1ALY | A | HIS | 249 | C | -4.465024  | 5.256609  | -8.999811  | -4.604333 |
| 1ALY | A | GLY | 250 | T | -3.786000  | 5.767682  | -8.401814  | -4.759773 |
| 1ALY | A | THR | 251 | T | -3.782381  | 5.786665  | -8.414172  | -4.761203 |
| 1ALY | A | GLY | 252 | T | -3.783762  | 5.781709  | -8.408628  | -4.762124 |
| 1ALY | A | PHE | 253 | T | -3.802937  | 5.808653  | -8.330893  | -4.764080 |
| 1ALY | A | THR | 254 | E | -4.007986  | 6.025935  | -8.134155  | -4.828748 |
| 1ALY | A | SER | 255 | E | -6.806125  | 8.867872  | -10.407060 | -4.979119 |
| 1ALY | A | PHE | 256 | E | -11.573553 | 15.077970 | -14.260007 | -5.434141 |
| 1ALY | A | GLY | 257 | E | -9.792790  | 14.286287 | -10.985420 | -4.681875 |
| 1ALY | A | LEU | 258 | E | -8.680709  | 13.409774 | -9.179427  | -3.824486 |
| 1ALY | A | LEU | 259 | E | -8.680709  | 13.409774 | -9.179427  | -3.824486 |
| 1ALY | A | LYS | 260 | E | -8.680709  | 13.409774 | -9.179427  | -3.824486 |
| 1ALY | A | LEU | 261 | C | -8.680709  | 13.409774 | -9.179427  | -3.824486 |
| 1B56 | A | THR | 3   | C | -6.257161  | 7.033560  | -9.185410  | -3.650927 |
| 1B56 | A | VAL | 4   | G | -6.257161  | 7.033560  | -9.185410  | -3.650927 |
| 1B56 | A | GLN | 5   | G | -6.257161  | 7.033560  | -9.185410  | -3.650927 |
| 1B56 | A | GLN | 6   | G | -6.257161  | 7.033560  | -9.185410  | -3.650927 |
| 1B56 | A | LEU | 7   | G | -7.974457  | 11.132250 | -10.258627 | -4.500509 |
| 1B56 | A | GLU | 8   | C | -10.002533 | 12.929662 | -13.821722 | -5.855770 |
| 1B56 | A | GLY | 9   | E | -11.343829 | 13.427250 | -16.460869 | -6.884542 |
| 1B56 | A | ARG | 10  | E | -14.010194 | 17.122186 | -17.558180 | -5.811340 |
| 1B56 | A | TRP | 11  | E | -12.533935 | 15.564286 | -14.596612 | -4.989684 |
| 1B56 | A | ARG | 12  | E | -9.885829  | 10.294696 | -13.493313 | -4.783853 |
| 1B56 | A | LEU | 13  | E | -7.976517  | 8.228102  | -11.948320 | -4.613237 |
| 1B56 | A | VAL | 14  | E | -6.906384  | 5.814092  | -12.038576 | -4.585173 |
| 1B56 | A | ASP | 15  | E | -6.903316  | 5.828409  | -12.054613 | -4.588840 |
| 1B56 | A | SER | 16  | E | -6.902651  | 5.831745  | -12.059696 | -4.590090 |
| 1B56 | A | LYS | 17  | E | -6.905677  | 5.807952  | -12.056368 | -4.590437 |
| 1B56 | A | GLY | 18  | T | -7.007221  | 5.371857  | -12.088780 | -4.587570 |
| 1B56 | A | PHE | 19  | H | -9.783243  | 8.840753  | -15.577199 | -5.438557 |

|      |   |     |     |   |            |           |            |           |
|------|---|-----|-----|---|------------|-----------|------------|-----------|
| 1B56 | A | ASP | 20  | H | -10.432977 | 9.363372  | -16.452316 | -5.727943 |
| 1B56 | A | GLU | 21  | H | -10.791462 | 9.581428  | -16.449629 | -5.790555 |
| 1B56 | A | TYR | 22  | H | -12.532879 | 14.887521 | -17.152102 | -6.232692 |
| 1B56 | A | MET | 23  | H | -10.048008 | 11.581072 | -14.319338 | -5.821663 |
| 1B56 | A | LYS | 24  | H | -9.213858  | 10.329813 | -13.750069 | -5.397369 |
| 1B56 | A | GLU | 25  | H | -7.370449  | 9.079475  | -11.313025 | -5.051804 |
| 1B56 | A | LEU | 26  | H | -6.364584  | 8.067015  | -10.221022 | -4.584120 |
| 1B56 | A | GLY | 27  | C | -4.903725  | 5.331480  | -9.095095  | -4.181372 |
| 1B56 | A | VAL | 28  | C | -4.875479  | 5.407939  | -9.132392  | -4.168463 |
| 1B56 | A | GLY | 29  | C | -4.871186  | 5.424958  | -9.147078  | -4.169042 |
| 1B56 | A | ILE | 30  | H | -4.878683  | 5.379876  | -9.121331  | -4.156610 |
| 1B56 | A | ALA | 31  | H | -4.919487  | 5.204332  | -9.060110  | -4.133472 |
| 1B56 | A | LEU | 32  | H | -6.583344  | 7.184379  | -10.148170 | -3.971977 |
| 1B56 | A | ARG | 33  | H | -7.646515  | 8.179088  | -11.363822 | -4.291435 |
| 1B56 | A | LYS | 34  | H | -8.382833  | 9.335905  | -12.140532 | -4.459509 |
| 1B56 | A | MET | 35  | H | -8.428061  | 9.479552  | -12.546080 | -4.782647 |
| 1B56 | A | GLY | 36  | H | -6.088716  | 7.655849  | -9.308107  | -4.217214 |
| 1B56 | A | ALA | 37  | H | -5.946690  | 7.982208  | -9.248654  | -4.160271 |
| 1B56 | A | MET | 38  | H | -5.940889  | 7.993692  | -9.275478  | -4.163064 |
| 1B56 | A | ALA | 39  | C | -5.944747  | 7.987242  | -9.252812  | -4.158726 |
| 1B56 | A | LYS | 40  | C | -5.949361  | 7.973271  | -9.230580  | -4.154544 |
| 1B56 | A | PRO | 41  | C | -6.833678  | 9.190518  | -9.181313  | -3.976248 |
| 1B56 | A | ASP | 42  | E | -8.638044  | 9.259836  | -12.205736 | -4.479215 |
| 1B56 | A | CYS | 43  | E | -10.019839 | 11.098145 | -14.296811 | -4.883357 |
| 1B56 | A | ILE | 44  | E | -8.765600  | 11.396080 | -11.607135 | -4.751893 |
| 1B56 | A | ILE | 45  | E | -6.362778  | 8.698495  | -9.916604  | -4.890056 |
| 1B56 | A | THR | 46  | E | -4.527615  | 5.687599  | -9.332034  | -4.946157 |
| 1B56 | A | CYS | 47  | E | -3.981996  | 5.024500  | -9.498827  | -5.033394 |
| 1B56 | A | ASP | 48  | E | -3.952181  | 5.148053  | -9.511721  | -5.029934 |
| 1B56 | A | GLY | 49  | T | -3.952243  | 5.147137  | -9.511871  | -5.030077 |
| 1B56 | A | LYS | 50  | T | -3.962315  | 5.086833  | -9.505005  | -5.032222 |
| 1B56 | A | ASN | 51  | E | -4.234485  | 4.815379  | -9.613409  | -5.076323 |
| 1B56 | A | LEU | 52  | E | -5.737373  | 7.539197  | -9.752672  | -4.952389 |
| 1B56 | A | THR | 53  | E | -9.075757  | 9.867426  | -13.516911 | -5.407701 |
| 1B56 | A | ILE | 54  | E | -11.247452 | 14.596478 | -15.695392 | -6.010526 |
| 1B56 | A | LYS | 55  | E | -10.165981 | 10.293418 | -15.311344 | -5.632886 |
| 1B56 | A | THR | 56  | E | -9.072890  | 8.580533  | -14.136236 | -5.122804 |
| 1B56 | A | GLU | 57  | E | -9.023521  | 8.500834  | -14.313974 | -5.151444 |
| 1B56 | A | SER | 58  | T | -6.689522  | 8.054922  | -10.588308 | -4.810957 |
| 1B56 | A | THR | 59  | T | -6.653318  | 8.104692  | -10.688168 | -4.815769 |
| 1B56 | A | LEU | 60  | T | -6.653779  | 8.105937  | -10.684186 | -4.815470 |
| 1B56 | A | LYS | 61  | T | -6.662060  | 8.105344  | -10.639058 | -4.812751 |
| 1B56 | A | THR | 62  | E | -6.660121  | 8.128447  | -10.641458 | -4.815270 |
| 1B56 | A | THR | 63  | E | -8.262369  | 9.272275  | -12.413843 | -4.968885 |
| 1B56 | A | GLN | 64  | E | -9.584659  | 12.543792 | -13.677914 | -5.637862 |
| 1B56 | A | PHE | 65  | E | -9.727479  | 12.899881 | -13.316691 | -5.596998 |
| 1B56 | A | SER | 66  | E | -9.613118  | 12.223444 | -13.635784 | -5.527552 |
| 1B56 | A | CYS | 67  | E | -8.866077  | 9.083453  | -13.910264 | -5.357541 |
| 1B56 | A | THR | 68  | E | -6.920937  | 10.738514 | -9.895434  | -5.086193 |
| 1B56 | A | LEU | 69  | T | -6.917135  | 10.751717 | -9.911336  | -5.086502 |
| 1B56 | A | GLY | 70  | T | -6.842393  | 10.766854 | -10.132325 | -5.139658 |
| 1B56 | A | GLU | 71  | E | -6.843268  | 10.769797 | -10.125088 | -5.139780 |
| 1B56 | A | LYS | 72  | E | -6.860965  | 10.828764 | -10.015018 | -5.134093 |
| 1B56 | A | PHE | 73  | E | -8.069013  | 11.001521 | -11.859665 | -5.525218 |
| 1B56 | A | GLU | 74  | E | -8.079200  | 10.871301 | -11.932653 | -5.548716 |
| 1B56 | A | GLU | 75  | E | -9.822762  | 10.501164 | -15.480664 | -5.822401 |
| 1B56 | A | THR | 76  | E | -7.343313  | 7.856815  | -12.279833 | -5.364646 |
| 1B56 | A | THR | 77  | E | -7.312813  | 7.902895  | -12.365128 | -5.370728 |
| 1B56 | A | ALA | 78  | T | -7.308307  | 7.909758  | -12.389767 | -5.373328 |
| 1B56 | A | ASP | 79  | T | -7.311103  | 7.902055  | -12.379604 | -5.372786 |
| 1B56 | A | GLY | 80  | T | -7.312381  | 7.898586  | -12.371640 | -5.372201 |
| 1B56 | A | ARG | 81  | E | -8.941750  | 8.997423  | -14.370978 | -5.570657 |
| 1B56 | A | LYS | 82  | E | -9.875388  | 9.497308  | -15.871140 | -5.820196 |
| 1B56 | A | THR | 83  | E | -10.403862 | 10.285428 | -16.249574 | -5.942501 |
| 1B56 | A | GLN | 84  | E | -11.049273 | 11.347997 | -16.315931 | -5.652702 |
| 1B56 | A | THR | 85  | E | -11.033113 | 11.886597 | -15.855491 | -5.515070 |
| 1B56 | A | VAL | 86  | E | -10.745818 | 12.248443 | -15.089847 | -5.203223 |
| 1B56 | A | CYS | 87  | E | -10.177188 | 10.439219 | -14.522063 | -4.917285 |
| 1B56 | A | ASN | 88  | E | -6.595147  | 7.527309  | -10.402423 | -4.599472 |
| 1B56 | A | PHE | 89  | E | -5.325200  | 7.937085  | -8.466579  | -4.329514 |
| 1B56 | A | THR | 90  | E | -5.219571  | 8.231659  | -8.504197  | -4.355648 |
| 1B56 | A | ASP | 91  | T | -5.218640  | 8.235396  | -8.509492  | -4.356005 |
| 1B56 | A | GLY | 92  | T | -5.218738  | 8.235172  | -8.508521  | -4.355919 |
| 1B56 | A | ALA | 93  | E | -5.279697  | 8.312350  | -8.304044  | -4.329472 |
| 1B56 | A | LEU | 94  | E | -6.287557  | 9.748388  | -8.726928  | -4.489491 |
| 1B56 | A | VAL | 95  | E | -9.027636  | 10.670636 | -11.940330 | -4.589277 |
| 1B56 | A | GLN | 96  | E | -12.024761 | 12.990980 | -15.556648 | -5.348977 |
| 1B56 | A | HIS | 97  | E | -13.166810 | 13.381326 | -18.641936 | -6.515769 |
| 1B56 | A | GLN | 98  | E | -9.407466  | 10.503049 | -14.781298 | -6.405870 |
| 1B56 | A | GLU | 99  | E | -5.052506  | 9.093129  | -8.794625  | -5.541829 |
| 1B56 | A | TRP | 100 | E | -4.611166  | 8.967075  | -8.753854  | -5.490013 |

|      |   |     |     |   |            |           |            |           |
|------|---|-----|-----|---|------------|-----------|------------|-----------|
| 1B56 | A | ASP | 101 | T | -4.534885  | 8.593687  | -9.060061  | -5.477597 |
| 1B56 | A | GLY | 102 | T | -4.534524  | 8.593511  | -9.063188  | -5.477628 |
| 1B56 | A | LYS | 103 | E | -4.534680  | 8.593014  | -9.061686  | -5.477378 |
| 1B56 | A | GLU | 104 | E | -4.854610  | 8.232355  | -9.252035  | -5.429482 |
| 1B56 | A | SER | 105 | E | -5.784620  | 5.881385  | -11.296213 | -5.383376 |
| 1B56 | A | THR | 106 | E | -8.912067  | 8.353335  | -14.201977 | -5.522154 |
| 1B56 | A | ILE | 107 | E | -11.467683 | 12.365598 | -15.868666 | -5.435320 |
| 1B56 | A | THR | 108 | E | -11.830895 | 12.978656 | -15.956740 | -5.488004 |
| 1B56 | A | ARG | 109 | E | -10.202230 | 13.271910 | -13.304827 | -5.544415 |
| 1B56 | A | LYS | 110 | E | -4.861151  | 7.969654  | -8.351928  | -4.931378 |
| 1B56 | A | LEU | 111 | E | -2.627902  | 7.702969  | -5.687926  | -4.884994 |
| 1B56 | A | LYS | 112 | E | -2.597872  | 7.829781  | -5.743985  | -4.894835 |
| 1B56 | A | ASP | 113 | T | -2.596448  | 7.839099  | -5.749648  | -4.894800 |
| 1B56 | A | GLY | 114 | T | -2.596443  | 7.839165  | -5.749683  | -4.894798 |
| 1B56 | A | LYS | 115 | E | -2.609872  | 7.831858  | -5.686898  | -4.891255 |
| 1B56 | A | LEU | 116 | E | -4.365336  | 10.156360 | -6.749272  | -4.960127 |
| 1B56 | A | VAL | 117 | E | -6.182197  | 11.537241 | -7.977299  | -4.760225 |
| 1B56 | A | VAL | 118 | E | -9.295232  | 14.708832 | -10.738478 | -4.867085 |
| 1B56 | A | GLU | 119 | E | -10.752949 | 15.295815 | -14.850011 | -6.172433 |
| 1B56 | A | CYS | 120 | E | -8.953876  | 8.078909  | -14.306104 | -5.390310 |
| 1B56 | A | VAL | 121 | E | -6.938639  | 8.327326  | -10.993320 | -4.923864 |
| 1B56 | A | MET | 122 | E | -5.655915  | 8.477108  | -9.348416  | -4.887917 |
| 1B56 | A | ASN | 123 | T | -5.040681  | 6.970536  | -9.399499  | -4.690917 |
| 1B56 | A | ASN | 124 | T | -4.968592  | 7.132335  | -9.391067  | -4.664949 |
| 1B56 | A | VAL | 125 | E | -4.969276  | 7.131442  | -9.385401  | -4.664097 |
| 1B56 | A | THR | 126 | E | -4.990282  | 7.087820  | -9.331335  | -4.655227 |
| 1B56 | A | CYS | 127 | E | -5.191495  | 6.517237  | -9.409354  | -4.562466 |
| 1B56 | A | THR | 128 | E | -6.252463  | 8.380432  | -9.322845  | -4.462465 |
| 1B56 | A | ARG | 129 | E | -11.824254 | 12.474640 | -15.874864 | -5.193526 |
| 1B56 | A | ILE | 130 | E | -11.412526 | 16.230865 | -14.239698 | -5.981592 |
| 1B56 | A | TYR | 131 | E | -9.430974  | 13.415238 | -12.268033 | -5.508186 |
| 1B56 | A | GLU | 132 | E | -5.786313  | 6.824197  | -8.990081  | -4.018113 |
| 1B56 | A | LYS | 133 | E | -5.786313  | 6.824197  | -8.990081  | -4.018113 |
| 1B56 | A | VAL | 134 | C | -5.786313  | 6.824197  | -8.990081  | -4.018113 |
| 1B56 | A | GLU | 135 | C | -5.786313  | 6.824197  | -8.990081  | -4.018113 |
| 1B90 | A | LYS | 1   | C | -10.640866 | 9.379202  | -14.619421 | -4.553443 |
| 1B90 | A | GLN | 2   | B | -10.640866 | 9.379202  | -14.619421 | -4.553443 |
| 1B90 | A | PHE | 3   | C | -10.640866 | 9.379202  | -14.619421 | -4.553443 |
| 1B90 | A | THR | 4   | C | -10.640866 | 9.379202  | -14.619421 | -4.553443 |
| 1B90 | A | LYS | 5   | H | -13.681732 | 12.807432 | -19.958785 | -6.440011 |
| 1B90 | A | CYS | 6   | H | -11.660715 | 11.872784 | -16.228765 | -5.761778 |
| 1B90 | A | GLU | 7   | H | -10.787838 | 12.813063 | -14.381355 | -5.310937 |
| 1B90 | A | LEU | 8   | H | -10.192411 | 14.439890 | -12.600528 | -4.994977 |
| 1B90 | A | SER | 9   | H | -9.845820  | 13.278363 | -12.833354 | -4.876410 |
| 1B90 | A | GLN | 10  | H | -7.535867  | 9.709440  | -10.255031 | -4.345441 |
| 1B90 | A | LEU | 11  | H | -7.391280  | 10.365479 | -10.105963 | -4.352142 |
| 1B90 | A | LEU | 12  | H | -7.038152  | 10.985544 | -9.776164  | -4.462306 |
| 1B90 | A | LYS | 13  | G | -6.268350  | 8.483318  | -10.168246 | -4.604229 |
| 1B90 | A | ASP | 14  | G | -6.264123  | 8.499082  | -10.188764 | -4.610230 |
| 1B90 | A | ILE | 15  | G | -6.327625  | 8.398384  | -10.212700 | -4.653557 |
| 1B90 | A | ASP | 16  | T | -5.965326  | 7.465784  | -10.795668 | -4.915131 |
| 1B90 | A | GLY | 17  | T | -5.361198  | 7.866143  | -9.757807  | -4.929047 |
| 1B90 | A | TYR | 18  | G | -5.413221  | 8.083610  | -9.658931  | -4.957466 |
| 1B90 | A | GLY | 19  | G | -5.325934  | 8.378258  | -9.497432  | -4.872398 |
| 1B90 | A | GLY | 20  | G | -5.324282  | 8.390542  | -9.491251  | -4.866887 |
| 1B90 | A | ILE | 21  | C | -5.428741  | 8.732065  | -9.121235  | -4.804237 |
| 1B90 | A | ALA | 22  | C | -6.240801  | 10.189984 | -8.948482  | -4.454238 |
| 1B90 | A | LEU | 23  | H | -6.472787  | 10.326152 | -8.576151  | -4.335231 |
| 1B90 | A | PRO | 24  | H | -8.386114  | 12.431243 | -9.626011  | -4.033854 |
| 1B90 | A | GLU | 25  | H | -10.158636 | 17.019723 | -11.012573 | -4.627640 |
| 1B90 | A | LEU | 26  | H | -10.293357 | 17.561723 | -10.847552 | -4.722149 |
| 1B90 | A | ILE | 27  | H | -10.924757 | 18.081848 | -12.201035 | -5.084264 |
| 1B90 | A | CYS | 28  | H | -10.983517 | 15.975012 | -13.915497 | -5.465462 |
| 1B90 | A | THR | 29  | H | -10.537301 | 15.251326 | -13.475333 | -5.518113 |
| 1B90 | A | MET | 30  | H | -10.540731 | 15.011996 | -13.594715 | -5.514110 |
| 1B90 | A | PHE | 31  | H | -8.584734  | 10.157621 | -12.526064 | -5.215674 |
| 1B90 | A | HIS | 32  | H | -8.582187  | 10.167294 | -12.538511 | -5.218026 |
| 1B90 | A | THR | 33  | H | -8.584770  | 10.149479 | -12.530249 | -5.215968 |
| 1B90 | A | SER | 34  | H | -8.598500  | 10.032083 | -12.522108 | -5.210143 |
| 1B90 | A | GLY | 35  | T | -8.600239  | 10.020241 | -12.514850 | -5.209210 |
| 1B90 | A | TYR | 36  | T | -11.378503 | 13.350059 | -15.644059 | -5.649609 |
| 1B90 | A | ASP | 37  | B | -8.699312  | 9.823452  | -11.801147 | -4.471428 |
| 1B90 | A | THR | 38  | T | -8.312157  | 9.733694  | -12.028985 | -4.532804 |
| 1B90 | A | GLN | 39  | T | -5.885608  | 7.983983  | -8.641083  | -4.051386 |
| 1B90 | A | ALA | 40  | T | -5.776763  | 7.749802  | -9.031566  | -4.101624 |
| 1B90 | A | ILE | 41  | E | -4.148982  | 6.013891  | -8.047542  | -4.426746 |
| 1B90 | A | VAL | 42  | E | -3.676333  | 4.695895  | -8.635689  | -4.495099 |
| 1B90 | A | GLU | 43  | E | -3.099790  | 5.144590  | -8.275558  | -4.868668 |
| 1B90 | A | ASN | 44  | T | -3.096881  | 5.142104  | -8.306459  | -4.884232 |
| 1B90 | A | ASP | 45  | T | -3.097672  | 5.141553  | -8.303687  | -4.885740 |
| 1B90 | A | GLU | 46  | T | -3.201063  | 4.989561  | -8.351306  | -4.960621 |

|      |   |     |     |   |            |           |            |           |
|------|---|-----|-----|---|------------|-----------|------------|-----------|
| 1B90 | A | SER | 47  | T | -3.369741  | 5.432681  | -8.085412  | -5.086836 |
| 1B90 | A | THR | 48  | E | -5.616255  | 6.860581  | -10.745625 | -5.460628 |
| 1B90 | A | GLU | 49  | E | -7.596640  | 9.486249  | -12.772138 | -6.071475 |
| 1B90 | A | TYR | 50  | E | -10.797453 | 15.971403 | -18.550445 | -9.821615 |
| 1B90 | A | GLY | 51  | T | -12.210458 | 15.655272 | -19.143379 | -8.330927 |
| 1B90 | A | LEU | 52  | T | -12.956843 | 16.559422 | -16.275054 | -5.963925 |
| 1B90 | A | PHE | 53  | T | -13.639310 | 18.340820 | -15.874840 | -5.788859 |
| 1B90 | A | GLN | 54  | T | -13.494926 | 16.204007 | -17.149807 | -5.954713 |
| 1B90 | A | ILE | 55  | E | -10.850774 | 13.119877 | -14.448410 | -5.714398 |
| 1B90 | A | SER | 56  | E | -10.790907 | 13.258959 | -14.585121 | -5.768189 |
| 1B90 | A | ASN | 57  | T | -10.714956 | 13.428583 | -14.743313 | -5.845485 |
| 1B90 | A | LYS | 58  | T | -10.241376 | 14.210664 | -14.058031 | -5.920853 |
| 1B90 | A | LEU | 59  | T | -10.236606 | 14.216347 | -14.075545 | -5.920885 |
| 1B90 | A | TRP | 60  | T | -10.375405 | 14.234293 | -14.197405 | -5.929730 |
| 1B90 | A | CYS | 61  | C | -9.616436  | 7.791916  | -15.989532 | -5.518818 |
| 1B90 | A | LYS | 62  | B | -8.964184  | 7.458709  | -14.797044 | -5.066017 |
| 1B90 | A | SER | 63  | B | -8.000940  | 5.812958  | -13.391270 | -4.410292 |
| 1B90 | A | SER | 64  | T | -6.919582  | 4.592687  | -11.953997 | -3.943251 |
| 1B90 | A | GLN | 65  | T | -6.867064  | 6.464970  | -12.089086 | -3.980868 |
| 1B90 | A | VAL | 66  | B | -5.329772  | 6.332089  | -8.182313  | -3.453963 |
| 1B90 | A | PRO | 67  | T | -5.135852  | 6.400507  | -8.511010  | -3.636789 |
| 1B90 | A | GLN | 68  | T | -5.126923  | 6.447654  | -8.528737  | -3.647727 |
| 1B90 | A | SER | 69  | T | -5.151445  | 6.536677  | -8.396103  | -3.639170 |
| 1B90 | A | ARG | 70  | C | -5.148681  | 6.554020  | -8.406252  | -3.645162 |
| 1B90 | A | ASN | 71  | T | -5.823448  | 6.757100  | -9.574933  | -4.150637 |
| 1B90 | A | ILE | 72  | T | -7.128996  | 8.315852  | -11.322314 | -4.506664 |
| 1B90 | A | CYS | 73  | T | -7.618464  | 8.098137  | -12.630024 | -4.848835 |
| 1B90 | A | ASP | 74  | T | -7.490555  | 7.904911  | -12.736614 | -4.844307 |
| 1B90 | A | ILE | 75  | C | -7.837782  | 8.049111  | -13.418487 | -5.014664 |
| 1B90 | A | SER | 76  | B | -7.976038  | 7.723733  | -13.543421 | -4.976288 |
| 1B90 | A | CYS | 77  | G | -8.083196  | 7.369378  | -13.655973 | -4.971935 |
| 1B90 | A | ASP | 78  | G | -8.309064  | 7.460661  | -13.417432 | -4.858194 |
| 1B90 | A | LYS | 79  | G | -9.292790  | 8.634181  | -14.126379 | -4.981129 |
| 1B90 | A | PHE | 80  | G | -10.463290 | 12.277932 | -14.902647 | -5.336196 |
| 1B90 | A | LEU | 81  | C | -8.164442  | 10.503530 | -11.326664 | -4.903459 |
| 1B90 | A | ASP | 82  | C | -6.873870  | 8.010608  | -10.802952 | -4.607239 |
| 1B90 | A | ASP | 83  | C | -6.629874  | 8.198703  | -10.848804 | -4.655180 |
| 1B90 | A | ASP | 84  | C | -6.626141  | 8.205032  | -10.866077 | -4.655735 |
| 1B90 | A | ILE | 85  | H | -6.626062  | 8.205670  | -10.865905 | -4.655421 |
| 1B90 | A | THR | 86  | H | -6.671225  | 8.025904  | -10.833940 | -4.636235 |
| 1B90 | A | ASP | 87  | H | -7.260667  | 8.589313  | -10.997183 | -4.749215 |
| 1B90 | A | ASP | 88  | H | -9.557362  | 9.519207  | -13.684354 | -4.737048 |
| 1B90 | A | ILE | 89  | H | -10.314964 | 12.066340 | -13.811030 | -4.801471 |
| 1B90 | A | MET | 90  | H | -10.475561 | 11.892086 | -14.140894 | -4.945234 |
| 1B90 | A | CYS | 91  | H | -10.391238 | 12.469980 | -13.936698 | -5.011813 |
| 1B90 | A | ALA | 92  | H | -10.345253 | 12.960518 | -13.747431 | -5.004953 |
| 1B90 | A | LYS | 93  | H | -10.287839 | 13.363227 | -13.618011 | -5.028547 |
| 1B90 | A | LYS | 94  | H | -9.132120  | 14.009385 | -10.284502 | -4.430213 |
| 1B90 | A | ILE | 95  | H | -7.695819  | 14.677764 | -7.916503  | -4.290170 |
| 1B90 | A | LEU | 96  | H | -6.311654  | 10.620112 | -8.477396  | -4.437801 |
| 1B90 | A | ASP | 97  | H | -5.793980  | 9.884598  | -8.551805  | -4.429151 |
| 1B90 | A | ILE | 98  | H | -5.683685  | 10.024303 | -8.605959  | -4.450725 |
| 1B90 | A | LYS | 99  | H | -5.683543  | 10.024049 | -8.610256  | -4.453404 |
| 1B90 | A | GLY | 100 | C | -5.701910  | 9.875677  | -8.639280  | -4.458988 |
| 1B90 | A | ILE | 101 | H | -5.932909  | 9.727149  | -8.686950  | -4.461328 |
| 1B90 | A | ASP | 102 | H | -6.723310  | 10.759790 | -8.915919  | -4.568884 |
| 1B90 | A | TYR | 103 | H | -9.098527  | 13.742878 | -11.422242 | -5.292310 |
| 1B90 | A | TRP | 104 | H | -8.386737  | 14.406379 | -9.431739  | -4.800161 |
| 1B90 | A | LEU | 105 | H | -5.723211  | 7.774631  | -8.514258  | -4.044027 |
| 1B90 | A | ALA | 106 | T | -4.770755  | 6.370211  | -8.179134  | -3.906527 |
| 1B90 | A | HIS | 107 | T | -4.742464  | 6.417155  | -8.286322  | -3.939206 |
| 1B90 | A | LYS | 108 | T | -4.699524  | 6.502751  | -8.400178  | -3.982968 |
| 1B90 | A | ALA | 109 | T | -4.678620  | 6.523980  | -8.481637  | -4.009317 |
| 1B90 | A | LEU | 110 | T | -4.783026  | 6.301490  | -8.513368  | -4.015830 |
| 1B90 | A | CYS | 111 | T | -5.732353  | 7.498680  | -10.515379 | -4.679539 |
| 1B90 | A | THR | 112 | T | -5.563423  | 7.381225  | -10.135072 | -4.559367 |
| 1B90 | A | GLU | 113 | T | -5.742518  | 7.281060  | -10.310794 | -4.564445 |
| 1B90 | A | LYS | 114 | T | -5.889381  | 7.226405  | -10.210246 | -4.514439 |
| 1B90 | A | LEU | 115 | G | -5.927829  | 7.160893  | -10.069001 | -4.463411 |
| 1B90 | A | GLU | 116 | G | -6.005445  | 7.203634  | -9.799445  | -4.397479 |
| 1B90 | A | GLN | 117 | G | -7.471478  | 7.528107  | -11.745169 | -4.691659 |
| 1B90 | A | TRP | 118 | G | -8.908107  | 11.635303 | -14.022504 | -6.479697 |
| 1B90 | A | LEU | 119 | C | -4.930608  | 5.718054  | -9.822473  | -5.063939 |
| 1B90 | A | CYS | 120 | C | -3.454516  | 4.017423  | -8.092946  | -4.327044 |
| 1B90 | A | GLU | 121 | C | -3.454516  | 4.017423  | -8.092946  | -4.327044 |
| 1B90 | A | LYS | 122 | C | -3.454516  | 4.017423  | -8.092946  | -4.327044 |
| 1B90 | A | LEU | 123 | C | -3.454516  | 4.017423  | -8.092946  | -4.327044 |
| 1BD8 | A | ARG | 7   | H | -7.414095  | 5.512327  | -11.455609 | -3.708748 |
| 1BD8 | A | ALA | 8   | H | -7.414095  | 5.512327  | -11.455609 | -3.708748 |
| 1BD8 | A | GLY | 9   | H | -7.414095  | 5.512327  | -11.455609 | -3.708748 |
| 1BD8 | A | ASP | 10  | H | -7.414095  | 5.512327  | -11.455609 | -3.708748 |



|      |   |     |    |   |            |           |            |           |
|------|---|-----|----|---|------------|-----------|------------|-----------|
| 1BD8 | A | ARG | 11 | H | -10.363962 | 6.658240  | -15.899881 | -4.608222 |
| 1BD8 | A | LEU | 12 | H | -11.349741 | 11.550752 | -14.698634 | -4.472762 |
| 1BD8 | A | SER | 13 | H | -10.558554 | 8.933440  | -14.656840 | -4.148912 |
| 1BD8 | A | GLY | 14 | H | -9.560564  | 7.808998  | -13.508397 | -3.774216 |
| 1BD8 | A | ALA | 15 | H | -9.288291  | 8.213187  | -13.310774 | -3.795946 |
| 1BD8 | A | ALA | 16 | H | -8.917036  | 7.777213  | -13.479567 | -3.994522 |
| 1BD8 | A | ALA | 17 | H | -8.359811  | 7.529941  | -13.055930 | -4.190844 |
| 1BD8 | A | ARG | 18 | H | -7.659383  | 6.816766  | -12.594081 | -4.357107 |
| 1BD8 | A | GLY | 19 | C | -7.028369  | 7.020608  | -12.312750 | -4.864587 |
| 1BD8 | A | ASP | 20 | C | -7.005157  | 7.154642  | -12.296266 | -4.866388 |
| 1BD8 | A | VAL | 21 | H | -7.010805  | 7.191908  | -12.270026 | -4.874286 |
| 1BD8 | A | GLN | 22 | H | -7.046210  | 7.201415  | -12.235905 | -4.908599 |
| 1BD8 | A | GLU | 23 | H | -7.215182  | 7.430878  | -12.178837 | -5.067259 |
| 1BD8 | A | VAL | 24 | H | -8.666709  | 10.566253 | -12.134064 | -4.646445 |
| 1BD8 | A | ARG | 25 | H | -9.520698  | 11.629584 | -12.352506 | -4.379573 |
| 1BD8 | A | ARG | 26 | H | -9.999366  | 12.014017 | -12.560968 | -4.277758 |
| 1BD8 | A | LEU | 27 | H | -10.641661 | 13.506229 | -13.106407 | -4.426153 |
| 1BD8 | A | LEU | 28 | H | -8.075101  | 9.009895  | -11.357713 | -4.384957 |
| 1BD8 | A | HIS | 29 | H | -7.767297  | 8.598130  | -11.485422 | -4.240788 |
| 1BD8 | A | ARG | 30 | H | -7.191736  | 8.318652  | -10.626653 | -3.906915 |
| 1BD8 | A | GLU | 31 | C | -7.185300  | 8.333187  | -10.644607 | -3.906470 |
| 1BD8 | A | LEU | 32 | C | -7.174217  | 8.377299  | -10.656313 | -3.903229 |
| 1BD8 | A | VAL | 33 | C | -7.299201  | 8.340837  | -10.474452 | -3.774016 |
| 1BD8 | A | HIS | 34 | T | -7.277703  | 8.960056  | -10.136315 | -3.768684 |
| 1BD8 | A | PRO | 35 | T | -8.014234  | 11.056467 | -10.282998 | -3.952779 |
| 1BD8 | A | ASP | 36 | T | -8.034215  | 11.090858 | -10.247473 | -3.970572 |
| 1BD8 | A | ALA | 37 | T | -8.024164  | 10.842464 | -10.442048 | -4.014419 |
| 1BD8 | A | LEU | 38 | C | -6.316597  | 6.258561  | -10.917369 | -4.585135 |
| 1BD8 | A | ASN | 39 | B | -5.714296  | 6.883539  | -10.627827 | -4.958128 |
| 1BD8 | A | ARG | 40 | T | -5.683041  | 7.004537  | -10.662374 | -4.967458 |
| 1BD8 | A | PHE | 41 | T | -5.677554  | 7.041537  | -10.673517 | -4.971038 |
| 1BD8 | A | GLY | 42 | T | -5.678509  | 7.041022  | -10.669332 | -4.972424 |
| 1BD8 | A | LYS | 43 | B | -5.910187  | 7.526656  | -10.537618 | -5.143585 |
| 1BD8 | A | THR | 44 | C | -7.332582  | 9.558044  | -11.419445 | -5.166375 |
| 1BD8 | A | ALA | 45 | G | -8.415314  | 11.101702 | -11.977200 | -5.331337 |
| 1BD8 | A | LEU | 46 | G | -10.463185 | 14.705881 | -12.724037 | -5.163345 |
| 1BD8 | A | GLN | 47 | G | -11.782266 | 16.747814 | -13.991928 | -5.225965 |
| 1BD8 | A | VAL | 48 | C | -10.864982 | 14.545899 | -13.284217 | -5.047642 |
| 1BD8 | A | MET | 49 | C | -10.613058 | 14.013070 | -13.582358 | -5.168600 |
| 1BD8 | A | MET | 50 | T | -10.021966 | 12.774527 | -13.477584 | -5.122054 |
| 1BD8 | A | PHE | 51 | T | -9.678928  | 12.654320 | -13.216088 | -5.048139 |
| 1BD8 | A | GLY | 52 | T | -8.028373  | 10.394692 | -10.943547 | -4.538809 |
| 1BD8 | A | SER | 53 | T | -8.011764  | 10.421470 | -10.967958 | -4.525477 |
| 1BD8 | A | THR | 54 | H | -7.957326  | 10.687519 | -10.882455 | -4.478266 |
| 1BD8 | A | ALA | 55 | H | -7.966978  | 10.669785 | -10.840219 | -4.466542 |
| 1BD8 | A | ILE | 56 | H | -7.981437  | 10.626105 | -10.789841 | -4.454414 |
| 1BD8 | A | ALA | 57 | H | -9.175998  | 13.101204 | -10.761316 | -4.122702 |
| 1BD8 | A | LEU | 58 | H | -9.339944  | 13.502728 | -10.347873 | -4.087110 |
| 1BD8 | A | GLU | 59 | H | -11.066504 | 14.697200 | -13.525673 | -4.833681 |
| 1BD8 | A | LEU | 60 | H | -8.739122  | 13.622506 | -10.511632 | -4.964682 |
| 1BD8 | A | LEU | 61 | H | -7.563497  | 11.877562 | -10.004788 | -4.821116 |
| 1BD8 | A | LYS | 62 | H | -7.386356  | 11.039923 | -10.541565 | -4.796167 |
| 1BD8 | A | GLN | 63 | H | -7.380311  | 11.022590 | -10.572044 | -4.790971 |
| 1BD8 | A | GLY | 64 | C | -7.367760  | 10.955060 | -10.635971 | -4.777599 |
| 1BD8 | A | ALA | 65 | C | -7.409127  | 10.629448 | -10.698582 | -4.726974 |
| 1BD8 | A | SER | 66 | T | -8.008248  | 8.765246  | -12.302362 | -4.582284 |
| 1BD8 | A | PRO | 67 | T | -8.795081  | 9.136088  | -12.964974 | -4.193940 |
| 1BD8 | A | ASN | 68 | T | -8.255763  | 7.513808  | -13.647192 | -4.782564 |
| 1BD8 | A | VAL | 69 | T | -8.084678  | 6.886263  | -13.863790 | -4.789950 |
| 1BD8 | A | GLN | 70 | C | -6.970053  | 4.234248  | -13.410951 | -4.859368 |
| 1BD8 | A | ASP | 71 | T | -5.590219  | 4.401458  | -11.006009 | -4.540473 |
| 1BD8 | A | THR | 72 | T | -5.575637  | 4.436664  | -11.053257 | -4.543779 |
| 1BD8 | A | SER | 73 | T | -5.579741  | 4.421581  | -11.032411 | -4.539760 |
| 1BD8 | A | GLY | 74 | T | -5.582351  | 4.417958  | -11.017538 | -4.539146 |
| 1BD8 | A | THR | 75 | C | -5.633667  | 4.468404  | -10.810316 | -4.510686 |
| 1BD8 | A | SER | 76 | C | -7.766884  | 5.947443  | -12.966191 | -4.675527 |
| 1BD8 | A | PRO | 77 | H | -10.201474 | 11.409226 | -13.640253 | -4.587821 |
| 1BD8 | A | VAL | 78 | H | -10.318360 | 11.907659 | -13.199104 | -4.561205 |
| 1BD8 | A | HIS | 79 | H | -11.688857 | 14.189375 | -14.283710 | -4.598177 |
| 1BD8 | A | ASP | 80 | H | -11.169240 | 12.228584 | -14.105126 | -4.455355 |
| 1BD8 | A | ALA | 81 | H | -10.110190 | 11.098940 | -13.236631 | -4.406116 |
| 1BD8 | A | ALA | 82 | H | -9.893052  | 11.142001 | -13.336737 | -4.462367 |
| 1BD8 | A | ARG | 83 | H | -9.603276  | 11.759217 | -13.015878 | -4.579629 |
| 1BD8 | A | THR | 84 | H | -7.732025  | 11.014757 | -10.505709 | -4.793374 |
| 1BD8 | A | GLY | 85 | T | -7.635571  | 11.259069 | -10.574453 | -4.819675 |
| 1BD8 | A | PHE | 86 | T | -7.639972  | 11.291110 | -10.546483 | -4.824822 |
| 1BD8 | A | LEU | 87 | H | -7.579499  | 11.568271 | -10.483658 | -4.808287 |
| 1BD8 | A | ASP | 88 | H | -7.568235  | 11.640326 | -10.472403 | -4.806342 |
| 1BD8 | A | THR | 89 | H | -8.330780  | 13.427867 | -10.679638 | -4.813628 |
| 1BD8 | A | LEU | 90 | H | -8.729538  | 14.228609 | -10.364455 | -4.667636 |
| 1BD8 | A | LYS | 91 | H | -8.620870  | 14.175683 | -10.295959 | -4.560400 |

|      |   |     |     |   |            |           |            |           |
|------|---|-----|-----|---|------------|-----------|------------|-----------|
| 1BD8 | A | VAL | 92  | H | -8.853120  | 14.290623 | -10.280927 | -4.260869 |
| 1BD8 | A | LEU | 93  | H | -7.966895  | 11.522031 | -10.155124 | -4.284926 |
| 1BD8 | A | VAL | 94  | H | -6.789788  | 9.303382  | -9.534504  | -4.136001 |
| 1BD8 | A | GLU | 95  | H | -6.725480  | 9.150464  | -9.813427  | -4.187787 |
| 1BD8 | A | HIS | 96  | H | -6.722148  | 9.136951  | -9.838307  | -4.192329 |
| 1BD8 | A | GLY | 97  | C | -6.726656  | 9.081936  | -9.852854  | -4.195529 |
| 1BD8 | A | ALA | 98  | C | -6.783706  | 8.882578  | -9.842545  | -4.180964 |
| 1BD8 | A | ASP | 99  | T | -7.811593  | 8.665495  | -12.125831 | -4.510030 |
| 1BD8 | A | VAL | 100 | T | -8.420577  | 10.171700 | -11.930848 | -4.278811 |
| 1BD8 | A | ASN | 101 | T | -8.469387  | 9.436557  | -12.401451 | -4.312887 |
| 1BD8 | A | VAL | 102 | T | -7.754570  | 7.401704  | -12.161217 | -4.196619 |
| 1BD8 | A | PRO | 103 | C | -6.510296  | 5.632672  | -11.329726 | -4.332861 |
| 1BD8 | A | ASP | 104 | T | -6.088611  | 6.017239  | -11.017706 | -4.417510 |
| 1BD8 | A | GLY | 105 | T | -6.014018  | 6.398895  | -10.920680 | -4.417003 |
| 1BD8 | A | THR | 106 | T | -6.014625  | 6.407014  | -10.911055 | -4.415278 |
| 1BD8 | A | GLY | 107 | T | -6.036804  | 6.413467  | -10.861381 | -4.424893 |
| 1BD8 | A | ALA | 108 | C | -6.337474  | 7.067345  | -10.623293 | -4.473868 |
| 1BD8 | A | LEU | 109 | C | -7.260541  | 9.396663  | -10.207792 | -4.402345 |
| 1BD8 | A | PRO | 110 | H | -9.328640  | 14.528574 | -10.443109 | -4.052206 |
| 1BD8 | A | ILE | 111 | H | -9.671206  | 16.162811 | -9.932876  | -4.084691 |
| 1BD8 | A | HIS | 112 | H | -10.408968 | 17.630672 | -10.647086 | -4.211274 |
| 1BD8 | A | LEU | 113 | H | -9.977065  | 14.592159 | -11.786993 | -4.558258 |
| 1BD8 | A | ALA | 114 | H | -8.351909  | 10.763380 | -11.591321 | -4.890690 |
| 1BD8 | A | VAL | 115 | H | -8.207691  | 10.585014 | -11.916646 | -4.954709 |
| 1BD8 | A | GLN | 116 | H | -7.697313  | 9.150071  | -12.423591 | -5.115671 |
| 1BD8 | A | GLU | 117 | H | -6.505127  | 7.903966  | -10.686228 | -4.714860 |
| 1BD8 | A | GLY | 118 | C | -6.225421  | 8.485632  | -10.049265 | -4.467036 |
| 1BD8 | A | HIS | 119 | C | -6.226814  | 8.525878  | -9.985215  | -4.436184 |
| 1BD8 | A | THR | 120 | H | -6.210810  | 8.619154  | -9.922959  | -4.395303 |
| 1BD8 | A | ALA | 121 | H | -6.238769  | 8.650337  | -9.781675  | -4.353398 |
| 1BD8 | A | VAL | 122 | H | -6.715181  | 9.812054  | -8.995484  | -3.983154 |
| 1BD8 | A | VAL | 123 | H | -7.890668  | 12.027967 | -8.950833  | -3.512564 |
| 1BD8 | A | SER | 124 | H | -8.184069  | 11.757474 | -8.924782  | -3.425257 |
| 1BD8 | A | PHE | 125 | H | -9.966277  | 15.069412 | -11.018911 | -3.999762 |
| 1BD8 | A | LEU | 126 | H | -9.904234  | 13.055669 | -12.595965 | -4.506264 |
| 1BD8 | A | ALA | 127 | H | -9.821543  | 11.840589 | -13.403029 | -4.657966 |
| 1BD8 | A | ALA | 128 | T | -9.840450  | 11.408276 | -13.716320 | -4.733432 |
| 1BD8 | A | GLU | 129 | T | -9.672525  | 10.916275 | -14.101498 | -4.935162 |
| 1BD8 | A | SER | 130 | T | -7.916702  | 10.282638 | -10.933966 | -4.628864 |
| 1BD8 | A | ASP | 131 | T | -6.314398  | 10.792399 | -8.014208  | -4.171128 |
| 1BD8 | A | LEU | 132 | T | -6.298684  | 10.821989 | -8.069883  | -4.175239 |
| 1BD8 | A | HIS | 133 | T | -6.221824  | 10.525607 | -8.348575  | -4.154677 |
| 1BD8 | A | ARG | 134 | T | -6.205300  | 10.470090 | -8.413189  | -4.137490 |
| 1BD8 | A | ARG | 135 | C | -5.394115  | 6.872945  | -8.829071  | -3.855506 |
| 1BD8 | A | ASP | 136 | T | -5.079059  | 6.582993  | -8.872595  | -4.020286 |
| 1BD8 | A | ALA | 137 | T | -4.993108  | 6.741973  | -8.947701  | -4.068242 |
| 1BD8 | A | ARG | 138 | T | -5.001059  | 6.725232  | -8.929695  | -4.069793 |
| 1BD8 | A | GLY | 139 | T | -5.003233  | 6.718792  | -8.922828  | -4.071643 |
| 1BD8 | A | LEU | 140 | C | -5.298569  | 7.358327  | -8.869978  | -4.263123 |
| 1BD8 | A | THR | 141 | C | -6.157664  | 7.900387  | -9.467694  | -4.373807 |
| 1BD8 | A | PRO | 142 | H | -8.625854  | 11.501815 | -11.050303 | -4.409992 |
| 1BD8 | A | LEU | 143 | H | -9.984064  | 15.047563 | -12.060969 | -4.674593 |
| 1BD8 | A | GLU | 144 | H | -9.827969  | 14.234529 | -12.212948 | -4.668123 |
| 1BD8 | A | LEU | 145 | H | -9.818163  | 14.105407 | -12.258648 | -4.650331 |
| 1BD8 | A | ALA | 146 | H | -9.082682  | 9.976768  | -13.019953 | -4.679468 |
| 1BD8 | A | LEU | 147 | H | -8.153530  | 8.640761  | -12.536514 | -4.741391 |
| 1BD8 | A | GLN | 148 | H | -8.112471  | 8.490694  | -12.717153 | -4.751746 |
| 1BD8 | A | ARG | 149 | H | -8.002168  | 7.860430  | -13.077021 | -4.732421 |
| 1BD8 | A | GLY | 150 | T | -7.579035  | 7.782142  | -12.461732 | -4.564768 |
| 1BD8 | A | ALA | 151 | T | -7.600729  | 7.774110  | -12.411793 | -4.543021 |
| 1BD8 | A | GLN | 152 | H | -7.792091  | 7.625080  | -12.437032 | -4.441891 |
| 1BD8 | A | ASP | 153 | H | -7.762420  | 7.980123  | -12.234865 | -4.405061 |
| 1BD8 | A | LEU | 154 | H | -7.841159  | 8.342564  | -11.891032 | -4.370289 |
| 1BD8 | A | VAL | 155 | H | -8.760813  | 10.960747 | -12.052275 | -4.347136 |
| 1BD8 | A | ASP | 156 | H | -8.745474  | 11.488573 | -12.369438 | -4.819719 |
| 1BD8 | A | ILE | 157 | H | -8.186375  | 12.522806 | -11.352962 | -5.239289 |
| 1BD8 | A | LEU | 158 | H | -7.029907  | 10.128511 | -10.103495 | -4.711212 |
| 1BD8 | A | GLN | 159 | H | -5.108958  | 5.327847  | -8.798574  | -3.793715 |
| 1BD8 | A | GLY | 160 | H | -5.108958  | 5.327847  | -8.798574  | -3.793715 |
| 1BD8 | A | HIS | 161 | C | -5.108958  | 5.327847  | -8.798574  | -3.793715 |
| 1BD8 | A | MET | 162 | C | -5.108958  | 5.327847  | -8.798574  | -3.793715 |
| 1BIK | A | SER | 25  | T | -7.357268  | 4.211299  | -13.271993 | -4.301518 |
| 1BIK | A | CYS | 26  | T | -7.357268  | 4.211299  | -13.271993 | -4.301518 |
| 1BIK | A | GLN | 27  | T | -7.357268  | 4.211299  | -13.271993 | -4.301518 |
| 1BIK | A | LEU | 28  | T | -7.357268  | 4.211299  | -13.271993 | -4.301518 |
| 1BIK | A | GLY | 29  | C | -7.176017  | 7.351022  | -11.783184 | -4.647991 |
| 1BIK | A | TYR | 30  | C | -7.034551  | 9.493371  | -10.124009 | -4.353832 |
| 1BIK | A | SER | 31  | C | -6.814262  | 8.402637  | -10.602094 | -4.297340 |
| 1BIK | A | ALA | 32  | C | -4.300721  | 4.969411  | -8.354024  | -4.142457 |
| 1BIK | A | GLY | 33  | C | -3.064680  | 3.253709  | -7.952193  | -4.276010 |
| 1BIK | A | PRO | 34  | C | -2.952657  | 3.288406  | -8.061181  | -4.256355 |

|      |   |     |     |   |            |           |            |           |
|------|---|-----|-----|---|------------|-----------|------------|-----------|
| 1BIK | A | CYS | 35  | C | -2.946623  | 3.282633  | -8.094311  | -4.257996 |
| 1BIK | A | MET | 36  | C | -2.944441  | 3.284239  | -8.107570  | -4.259264 |
| 1BIK | A | GLY | 37  | C | -3.007615  | 3.095981  | -8.072346  | -4.266719 |
| 1BIK | A | MET | 38  | C | -3.950390  | 3.423508  | -8.723963  | -4.137973 |
| 1BIK | A | THR | 39  | E | -5.451612  | 3.275954  | -11.278609 | -4.394913 |
| 1BIK | A | SER | 40  | E | -6.200491  | 3.961157  | -11.623869 | -4.511182 |
| 1BIK | A | ARG | 41  | E | -9.799862  | 7.474591  | -15.312219 | -5.114269 |
| 1BIK | A | TYR | 42  | E | -12.664001 | 13.685185 | -16.880992 | -5.757443 |
| 1BIK | A | PHE | 43  | E | -10.314982 | 12.573491 | -13.454829 | -5.354861 |
| 1BIK | A | TYR | 44  | E | -9.186164  | 9.426594  | -13.813176 | -5.250783 |
| 1BIK | A | ASN | 45  | E | -6.914333  | 5.507167  | -12.166292 | -4.833495 |
| 1BIK | A | GLY | 46  | T | -6.686855  | 5.714355  | -12.053750 | -4.696072 |
| 1BIK | A | THR | 47  | T | -6.685744  | 5.718591  | -12.059565 | -4.696078 |
| 1BIK | A | SER | 48  | T | -6.687015  | 5.703739  | -12.056766 | -4.694655 |
| 1BIK | A | MET | 49  | T | -6.693981  | 5.667921  | -12.036181 | -4.688354 |
| 1BIK | A | ALA | 50  | E | -7.356572  | 6.209311  | -11.847988 | -4.410173 |
| 1BIK | A | CYS | 51  | E | -9.912666  | 10.401803 | -14.629141 | -5.056859 |
| 1BIK | A | GLU | 52  | E | -10.250068 | 12.270061 | -14.226457 | -5.332161 |
| 1BIK | A | THR | 53  | E | -10.249435 | 12.377410 | -14.182819 | -5.340911 |
| 1BIK | A | PHE | 54  | E | -10.496708 | 13.167629 | -13.796979 | -5.363217 |
| 1BIK | A | GLN | 55  | E | -11.172960 | 11.005575 | -17.249949 | -6.052641 |
| 1BIK | A | TYR | 56  | E | -8.810700  | 7.717965  | -13.960771 | -5.207136 |
| 1BIK | A | GLY | 57  | C | -4.696891  | 4.795439  | -10.343633 | -5.207451 |
| 1BIK | A | GLY | 58  | C | -4.615770  | 4.830418  | -10.668125 | -5.316627 |
| 1BIK | A | CYS | 59  | C | -4.552649  | 4.786288  | -10.825725 | -5.328348 |
| 1BIK | A | MET | 60  | C | -4.546597  | 4.803307  | -10.850896 | -5.333335 |
| 1BIK | A | GLY | 61  | C | -4.546624  | 4.802745  | -10.851995 | -5.334108 |
| 1BIK | A | ASN | 62  | T | -5.431446  | 4.834281  | -12.610055 | -5.767223 |
| 1BIK | A | GLY | 63  | T | -5.850032  | 4.596507  | -12.339709 | -5.469164 |
| 1BIK | A | ASN | 64  | T | -7.226180  | 6.498654  | -13.450961 | -5.845479 |
| 1BIK | A | ASN | 65  | T | -8.850779  | 7.096903  | -15.705586 | -6.296705 |
| 1BIK | A | PHE | 66  | B | -11.674761 | 11.493277 | -17.672070 | -6.028193 |
| 1BIK | A | VAL | 67  | C | -9.134860  | 8.478098  | -14.110005 | -5.320513 |
| 1BIK | A | THR | 68  | C | -9.101708  | 8.492829  | -14.232657 | -5.341686 |
| 1BIK | A | GLU | 69  | H | -9.101918  | 8.491939  | -14.231095 | -5.341579 |
| 1BIK | A | LYS | 70  | H | -9.101700  | 8.491558  | -14.233236 | -5.341810 |
| 1BIK | A | GLU | 71  | H | -9.102599  | 8.476078  | -14.236073 | -5.341605 |
| 1BIK | A | CYS | 72  | H | -10.706942 | 8.960090  | -16.740322 | -5.752365 |
| 1BIK | A | LEU | 73  | H | -11.955331 | 9.599764  | -18.632648 | -5.876541 |
| 1BIK | A | GLN | 74  | H | -11.929346 | 9.572854  | -18.691797 | -5.877888 |
| 1BIK | A | THR | 75  | H | -11.226737 | 8.673649  | -17.202480 | -5.283699 |
| 1BIK | A | CYS | 76  | H | -10.818743 | 7.858288  | -16.903344 | -5.049409 |
| 1BIK | A | ARG | 77  | C | -10.718497 | 7.859108  | -16.642584 | -4.853057 |
| 1BIK | A | THR | 78  | C | -9.139941  | 6.111283  | -14.031433 | -4.145926 |
| 1BIK | A | VAL | 79  | G | -8.284655  | 5.913925  | -13.066322 | -4.014627 |
| 1BIK | A | ALA | 80  | G | -8.131071  | 6.602560  | -12.861936 | -4.071331 |
| 1BIK | A | ALA | 81  | G | -7.899751  | 7.120375  | -12.591839 | -4.113427 |
| 1BIK | A | CYS | 82  | G | -7.393961  | 7.993385  | -11.471024 | -4.114844 |
| 1BIK | A | ASN | 83  | G | -6.772806  | 8.677387  | -9.653314  | -3.757474 |
| 1BIK | A | LEU | 84  | C | -6.787782  | 8.937346  | -9.461645  | -3.729914 |
| 1BIK | A | PRO | 85  | C | -5.893860  | 9.433258  | -7.462773  | -3.447033 |
| 1BIK | A | ILE | 86  | C | -5.713846  | 9.630155  | -7.417042  | -3.455027 |
| 1BIK | A | VAL | 87  | C | -5.663683  | 9.461437  | -7.596300  | -3.496904 |
| 1BIK | A | ARG | 88  | C | -5.308603  | 8.357648  | -7.824098  | -3.583080 |
| 1BIK | A | GLY | 89  | C | -4.599716  | 5.698924  | -8.163187  | -3.605225 |
| 1BIK | A | PRO | 90  | C | -4.507411  | 5.712401  | -8.125829  | -3.596706 |
| 1BIK | A | CYS | 91  | C | -4.498795  | 5.631469  | -8.171527  | -3.589373 |
| 1BIK | A | ARG | 92  | C | -4.356307  | 6.386026  | -7.708440  | -3.536285 |
| 1BIK | A | ALA | 93  | C | -4.412667  | 6.357763  | -7.654833  | -3.524756 |
| 1BIK | A | PHE | 94  | C | -4.834777  | 8.230100  | -6.970450  | -3.430622 |
| 1BIK | A | ILE | 95  | E | -5.119656  | 8.935027  | -6.602154  | -3.396619 |
| 1BIK | A | GLN | 96  | E | -5.209205  | 9.220292  | -6.282069  | -3.399499 |
| 1BIK | A | LEU | 97  | E | -7.020733  | 11.968440 | -7.725510  | -3.909906 |
| 1BIK | A | TRP | 98  | E | -9.579359  | 16.804473 | -9.549437  | -4.372860 |
| 1BIK | A | ALA | 99  | E | -8.941126  | 10.351956 | -12.647315 | -4.722728 |
| 1BIK | A | PHE | 100 | E | -6.815151  | 7.804462  | -10.074194 | -4.217024 |
| 1BIK | A | ASP | 101 | E | -2.573685  | 3.894548  | -6.538526  | -4.171997 |
| 1BIK | A | ALA | 102 | T | -2.177028  | 3.835425  | -6.587750  | -4.133311 |
| 1BIK | A | VAL | 103 | T | -2.128523  | 3.905645  | -6.736331  | -4.186989 |
| 1BIK | A | LYS | 104 | T | -2.127672  | 3.910197  | -6.741552  | -4.188011 |
| 1BIK | A | GLY | 105 | T | -2.127708  | 3.910521  | -6.741296  | -4.188166 |
| 1BIK | A | LYS | 106 | E | -2.520033  | 3.826570  | -6.754428  | -4.094276 |
| 1BIK | A | CYS | 107 | E | -3.651908  | 4.601861  | -8.193061  | -4.613450 |
| 1BIK | A | VAL | 108 | E | -5.914788  | 7.393242  | -10.014439 | -4.692188 |
| 1BIK | A | LEU | 109 | E | -6.920767  | 9.669368  | -9.937724  | -4.768021 |
| 1BIK | A | PHE | 110 | E | -9.252856  | 15.314337 | -12.768469 | -6.313698 |
| 1BIK | A | PRO | 111 | E | -9.856864  | 13.354950 | -12.909955 | -5.051103 |
| 1BIK | A | TYR | 112 | E | -9.797754  | 10.142939 | -14.813323 | -5.356527 |
| 1BIK | A | GLY | 113 | C | -6.470288  | 5.338812  | -12.138316 | -5.182087 |
| 1BIK | A | GLY | 114 | C | -6.453564  | 5.351091  | -12.216988 | -5.190666 |
| 1BIK | A | CYS | 115 | C | -6.450710  | 5.353593  | -12.235115 | -5.191477 |

|      |   |     |     |   |            |           |            |           |
|------|---|-----|-----|---|------------|-----------|------------|-----------|
| 1BIK | A | GLN | 116 | C | -6.451229  | 5.347910  | -12.234333 | -5.191672 |
| 1BIK | A | GLY | 117 | C | -6.452397  | 5.340440  | -12.228615 | -5.191112 |
| 1BIK | A | ASN | 118 | T | -8.469181  | 5.885702  | -15.138259 | -5.472528 |
| 1BIK | A | GLY | 119 | T | -9.550331  | 6.213387  | -16.092739 | -5.393047 |
| 1BIK | A | ASN | 120 | T | -11.007441 | 8.103614  | -17.612551 | -5.806178 |
| 1BIK | A | LYS | 121 | T | -12.181829 | 10.276163 | -18.368287 | -6.229667 |
| 1BIK | A | PHE | 122 | B | -13.711235 | 16.220584 | -18.181982 | -6.410142 |
| 1BIK | A | TYR | 123 | C | -13.352761 | 14.535040 | -18.603977 | -6.555435 |
| 1BIK | A | SER | 124 | C | -12.661087 | 9.972396  | -19.716619 | -6.313179 |
| 1BIK | A | GLU | 125 | H | -12.535313 | 9.933685  | -19.827477 | -6.321148 |
| 1BIK | A | LYS | 126 | H | -12.229601 | 9.304591  | -19.750572 | -6.198248 |
| 1BIK | A | GLU | 127 | H | -12.233371 | 9.127160  | -19.929688 | -6.268681 |
| 1BIK | A | CYS | 128 | H | -11.237894 | 10.536051 | -18.357543 | -7.029112 |
| 1BIK | A | ARG | 129 | H | -9.721049  | 10.166396 | -15.019677 | -6.033217 |
| 1BIK | A | GLU | 130 | H | -7.643024  | 8.796681  | -11.721943 | -5.087511 |
| 1BIK | A | TYR | 131 | H | -6.816722  | 8.147039  | -10.459141 | -4.370228 |
| 1BIK | A | CYS | 132 | H | -6.816722  | 8.147039  | -10.459141 | -4.370228 |
| 1BIK | A | GLY | 133 | C | -6.816722  | 8.147039  | -10.459141 | -4.370228 |
| 1BIK | A | VAL | 134 | C | -6.816722  | 8.147039  | -10.459141 | -4.370228 |
| 1BKF | A | GLY | 1   | C | -6.733960  | 7.495679  | -9.443404  | -3.589599 |
| 1BKF | A | VAL | 2   | E | -6.733960  | 7.495679  | -9.443404  | -3.589599 |
| 1BKF | A | GLN | 3   | E | -6.733960  | 7.495679  | -9.443404  | -3.589599 |
| 1BKF | A | VAL | 4   | E | -6.733960  | 7.495679  | -9.443404  | -3.589599 |
| 1BKF | A | GLU | 5   | E | -5.713607  | 6.564558  | -8.994867  | -4.086456 |
| 1BKF | A | THR | 6   | E | -3.409409  | 6.383341  | -5.890205  | -3.905698 |
| 1BKF | A | ILE | 7   | E | -3.402172  | 6.374687  | -5.940157  | -3.909889 |
| 1BKF | A | SER | 8   | E | -3.383398  | 6.283145  | -6.087053  | -3.927833 |
| 1BKF | A | PRO | 9   | T | -3.310238  | 5.922805  | -6.454388  | -3.951981 |
| 1BKF | A | GLY | 10  | C | -3.184368  | 5.450192  | -6.881360  | -4.027853 |
| 1BKF | A | ASP | 11  | T | -3.819236  | 3.653129  | -9.008781  | -4.270164 |
| 1BKF | A | GLY | 12  | T | -3.832598  | 3.616604  | -8.984263  | -4.270132 |
| 1BKF | A | ARG | 13  | T | -3.873286  | 3.630932  | -8.866521  | -4.255509 |
| 1BKF | A | THR | 14  | T | -4.083682  | 3.839235  | -8.713270  | -4.313942 |
| 1BKF | A | PHE | 15  | C | -5.614857  | 6.962314  | -9.388667  | -4.420044 |
| 1BKF | A | PRO | 16  | C | -6.456830  | 9.041902  | -9.338409  | -4.003730 |
| 1BKF | A | LYS | 17  | T | -6.319371  | 8.610377  | -9.742050  | -4.266616 |
| 1BKF | A | ARG | 18  | T | -6.268609  | 8.630091  | -9.866995  | -4.328341 |
| 1BKF | A | GLY | 19  | T | -6.273566  | 8.599877  | -9.863322  | -4.329178 |
| 1BKF | A | GLN | 20  | E | -6.403492  | 8.211600  | -10.156861 | -4.445054 |
| 1BKF | A | THR | 21  | E | -6.764838  | 8.341961  | -10.662418 | -4.789075 |
| 1BKF | A | CYS | 22  | E | -7.695609  | 9.000417  | -11.356990 | -4.967874 |
| 1BKF | A | VAL | 23  | E | -9.712266  | 11.022684 | -13.611948 | -5.214035 |
| 1BKF | A | VAL | 24  | E | -10.668615 | 13.007939 | -13.243543 | -4.666812 |
| 1BKF | A | HIS | 25  | E | -10.875725 | 13.132436 | -13.007397 | -4.602506 |
| 1BKF | A | TYR | 26  | E | -12.346858 | 15.640762 | -15.406358 | -5.399106 |
| 1BKF | A | THR | 27  | E | -10.840487 | 13.856632 | -14.250211 | -5.679841 |
| 1BKF | A | GLY | 28  | E | -9.660864  | 10.630542 | -13.679061 | -5.197120 |
| 1BKF | A | MET | 29  | E | -8.394441  | 8.811870  | -12.708113 | -5.072811 |
| 1BKF | A | LEU | 30  | T | -6.175028  | 5.271889  | -10.758465 | -4.489116 |
| 1BKF | A | GLU | 31  | T | -4.614835  | 4.302583  | -9.758862  | -4.754812 |
| 1BKF | A | ASP | 32  | T | -4.581961  | 4.599511  | -9.746261  | -4.774767 |
| 1BKF | A | GLY | 33  | T | -4.581120  | 4.606042  | -9.749187  | -4.774954 |
| 1BKF | A | LYS | 34  | C | -4.581891  | 4.601177  | -9.745553  | -4.774583 |
| 1BKF | A | LYS | 35  | E | -4.622589  | 4.559452  | -9.676389  | -4.795625 |
| 1BKF | A | PHE | 36  | E | -6.293229  | 9.791484  | -9.598558  | -5.115245 |
| 1BKF | A | ASP | 37  | E | -8.354017  | 9.458024  | -12.090358 | -4.939743 |
| 1BKF | A | SER | 38  | E | -9.835872  | 11.172503 | -13.538894 | -5.119935 |
| 1BKF | A | SER | 39  | G | -9.966362  | 6.178503  | -16.530051 | -5.234935 |
| 1BKF | A | ARG | 40  | G | -7.787088  | 3.746497  | -14.026187 | -4.800044 |
| 1BKF | A | ASP | 41  | G | -5.386600  | 3.783428  | -10.060013 | -4.107783 |
| 1BKF | A | LYS | 42  | G | -5.377192  | 3.844349  | -10.076907 | -4.107721 |
| 1BKF | A | ASN | 43  | T | -5.346341  | 4.101813  | -10.038653 | -4.104282 |
| 1BKF | A | LYS | 44  | T | -5.345760  | 4.115071  | -10.035737 | -4.104120 |
| 1BKF | A | PRO | 45  | C | -5.355219  | 4.122193  | -9.972338  | -4.093050 |
| 1BKF | A | PHE | 46  | E | -6.947326  | 8.749377  | -9.731913  | -4.058491 |
| 1BKF | A | LYS | 47  | E | -7.096685  | 9.066661  | -9.331094  | -4.046001 |
| 1BKF | A | PHE | 48  | E | -9.240517  | 14.618831 | -9.658303  | -4.307047 |
| 1BKF | A | MET | 49  | E | -8.038045  | 9.192463  | -11.511378 | -4.885982 |
| 1BKF | A | LEU | 50  | E | -6.866151  | 8.067930  | -10.884844 | -4.878873 |
| 1BKF | A | GLY | 51  | T | -5.144417  | 6.013777  | -9.274312  | -4.568201 |
| 1BKF | A | LYS | 52  | T | -5.111446  | 6.190202  | -9.271257  | -4.552428 |
| 1BKF | A | GLN | 53  | C | -5.104020  | 6.245439  | -9.270005  | -4.545960 |
| 1BKF | A | GLU | 54  | C | -5.107162  | 6.233955  | -9.256706  | -4.543199 |
| 1BKF | A | VAL | 55  | C | -5.133996  | 6.157125  | -9.185795  | -4.527609 |
| 1BKF | A | ILE | 56  | C | -6.699722  | 9.577891  | -9.246445  | -4.232288 |
| 1BKF | A | ARG | 57  | H | -7.623978  | 10.726756 | -9.363203  | -4.069996 |
| 1BKF | A | GLY | 58  | H | -8.866052  | 11.429969 | -10.713783 | -4.330246 |
| 1BKF | A | TRP | 59  | H | -11.217662 | 15.576733 | -11.798833 | -4.338825 |
| 1BKF | A | GLU | 60  | H | -12.311017 | 13.252736 | -16.195996 | -5.154505 |
| 1BKF | A | GLU | 61  | H | -10.364523 | 10.149008 | -13.634786 | -4.460101 |
| 1BKF | A | GLY | 62  | H | -9.630764  | 11.435265 | -12.392522 | -4.461722 |

|      |   |     |     |   |            |           |            |           |
|------|---|-----|-----|---|------------|-----------|------------|-----------|
| 1BKF | A | VAL | 63  | H | -9.623655  | 11.448100 | -12.415758 | -4.461659 |
| 1BKF | A | ALA | 64  | H | -9.616025  | 11.444878 | -12.453577 | -4.463783 |
| 1BKF | A | GLN | 65  | C | -9.594901  | 11.393130 | -12.567003 | -4.487654 |
| 1BKF | A | MET | 66  | C | -9.771682  | 11.860088 | -12.258081 | -4.512908 |
| 1BKF | A | SER | 67  | T | -11.137242 | 10.855446 | -15.714237 | -4.981992 |
| 1BKF | A | VAL | 68  | T | -11.220588 | 10.481762 | -16.016290 | -5.066313 |
| 1BKF | A | GLY | 69  | T | -11.348702 | 10.285672 | -16.173729 | -5.170438 |
| 1BKF | A | GLN | 70  | E | -12.271878 | 10.717354 | -17.614447 | -5.365728 |
| 1BKF | A | ARG | 71  | E | -12.753884 | 10.571094 | -18.094426 | -5.308899 |
| 1BKF | A | ALA | 72  | E | -12.347818 | 14.122366 | -14.890567 | -4.753406 |
| 1BKF | A | LYS | 73  | E | -12.259142 | 15.540786 | -13.935553 | -4.662150 |
| 1BKF | A | LEU | 74  | E | -11.426259 | 14.855419 | -12.403601 | -4.092708 |
| 1BKF | A | THR | 75  | E | -9.136135  | 11.304576 | -10.763063 | -4.000299 |
| 1BKF | A | ILE | 76  | E | -8.835259  | 11.688157 | -10.618918 | -3.958081 |
| 1BKF | A | SER | 77  | C | -7.882403  | 11.379066 | -9.584048  | -3.970312 |
| 1BKF | A | PRO | 78  | G | -7.832646  | 11.850282 | -9.640972  | -4.097417 |
| 1BKF | A | ASP | 79  | G | -7.693077  | 12.417674 | -9.794963  | -4.369725 |
| 1BKF | A | TYR | 80  | G | -7.707621  | 12.995285 | -9.928177  | -4.678259 |
| 1BKF | A | ALA | 81  | C | -6.455432  | 14.404261 | -10.461352 | -6.945347 |
| 1BKF | A | TYR | 82  | T | -5.192376  | 12.329196 | -8.796822  | -6.176683 |
| 1BKF | A | GLY | 83  | T | -4.413025  | 9.747580  | -7.914416  | -5.152812 |
| 1BKF | A | ALA | 84  | T | -3.310730  | 9.731882  | -6.341001  | -5.141016 |
| 1BKF | A | THR | 85  | T | -2.361704  | 5.480443  | -5.542427  | -3.888477 |
| 1BKF | A | GLY | 86  | T | -1.803394  | 4.815335  | -5.117192  | -3.673793 |
| 1BKF | A | VAL | 87  | B | -1.363317  | 6.328634  | -3.834011  | -3.527515 |
| 1BKF | A | PRO | 88  | T | -1.338282  | 6.466337  | -3.825013  | -3.525533 |
| 1BKF | A | GLY | 89  | T | -1.343354  | 6.482052  | -3.794818  | -3.522807 |
| 1BKF | A | ILE | 90  | T | -1.448126  | 6.743121  | -3.411257  | -3.432473 |
| 1BKF | A | ILE | 91  | B | -1.712237  | 7.719332  | -2.566643  | -3.258646 |
| 1BKF | A | PRO | 92  | T | -2.932304  | 9.963557  | -4.624940  | -4.245524 |
| 1BKF | A | PRO | 93  | T | -3.428666  | 11.742786 | -6.159733  | -5.774341 |
| 1BKF | A | HIS | 94  | T | -4.355553  | 12.181573 | -7.267461  | -5.963798 |
| 1BKF | A | ALA | 95  | T | -5.275705  | 12.125693 | -7.958070  | -5.153283 |
| 1BKF | A | THR | 96  | C | -5.595765  | 11.753405 | -7.643465  | -4.816575 |
| 1BKF | A | LEU | 97  | E | -7.734209  | 15.324607 | -9.428082  | -5.563268 |
| 1BKF | A | VAL | 98  | E | -9.478475  | 15.169305 | -9.985637  | -4.470925 |
| 1BKF | A | PHE | 99  | E | -12.032695 | 17.672555 | -11.407226 | -4.128457 |
| 1BKF | A | ASP | 100 | E | -13.949320 | 17.207982 | -15.804253 | -4.800605 |
| 1BKF | A | VAL | 101 | E | -13.747364 | 19.384996 | -15.464542 | -5.704734 |
| 1BKF | A | GLU | 102 | E | -12.017735 | 18.441742 | -13.349790 | -5.936717 |
| 1BKF | A | LEU | 103 | E | -9.196810  | 15.891697 | -8.926452  | -4.467118 |
| 1BKF | A | LEU | 104 | E | -6.361744  | 11.363841 | -6.549443  | -3.607401 |
| 1BKF | A | LYS | 105 | E | -6.361744  | 11.363841 | -6.549443  | -3.607401 |
| 1BKF | A | LEU | 106 | E | -6.361744  | 11.363841 | -6.549443  | -3.607401 |
| 1BKF | A | GLU | 107 | C | -6.361744  | 11.363841 | -6.549443  | -3.607401 |
| 1BKR | A | LYS | 2   | H | -5.514301  | 3.770435  | -10.989812 | -3.909980 |
| 1BKR | A | SER | 3   | H | -5.514301  | 3.770435  | -10.989812 | -3.909980 |
| 1BKR | A | ALA | 4   | H | -5.514301  | 3.770435  | -10.989812 | -3.909980 |
| 1BKR | A | LYS | 5   | H | -5.514301  | 3.770435  | -10.989812 | -3.909980 |
| 1BKR | A | ASP | 6   | H | -5.803708  | 3.899597  | -11.497926 | -4.302168 |
| 1BKR | A | ALA | 7   | H | -6.514523  | 4.268917  | -12.529867 | -4.785684 |
| 1BKR | A | LEU | 8   | H | -8.033162  | 8.265476  | -13.372612 | -5.578265 |
| 1BKR | A | LEU | 9   | H | -9.771626  | 11.200963 | -14.835012 | -5.822385 |
| 1BKR | A | LEU | 10  | H | -10.374128 | 11.448987 | -13.997521 | -4.802139 |
| 1BKR | A | TRP | 11  | H | -12.246690 | 15.181467 | -15.743459 | -5.390116 |
| 1BKR | A | CYS | 12  | H | -11.237676 | 13.030161 | -15.582673 | -5.906248 |
| 1BKR | A | GLN | 13  | H | -9.909491  | 11.669871 | -13.972823 | -5.478910 |
| 1BKR | A | MET | 14  | H | -6.640385  | 9.510213  | -10.091580 | -5.065316 |
| 1BKR | A | LYS | 15  | H | -6.600234  | 9.717640  | -10.138187 | -5.083451 |
| 1BKR | A | THR | 16  | H | -6.390205  | 9.650537  | -10.083975 | -4.903734 |
| 1BKR | A | ALA | 17  | T | -6.172597  | 9.221723  | -10.211060 | -4.827432 |
| 1BKR | A | GLY | 18  | T | -6.068051  | 9.612854  | -10.041360 | -4.815587 |
| 1BKR | A | TYR | 19  | T | -6.316687  | 9.846621  | -10.013431 | -4.673062 |
| 1BKR | A | PRO | 20  | T | -5.728719  | 10.926794 | -8.334021  | -4.560790 |
| 1BKR | A | ASN | 21  | T | -5.243072  | 11.130662 | -7.798286  | -4.761318 |
| 1BKR | A | VAL | 22  | T | -5.266096  | 11.277316 | -7.702940  | -4.773584 |
| 1BKR | A | ASN | 23  | C | -5.291408  | 11.262171 | -7.638738  | -4.774416 |
| 1BKR | A | ILE | 24  | C | -5.297188  | 11.248513 | -7.616837  | -4.773962 |
| 1BKR | A | HIS | 25  | C | -5.517742  | 11.094729 | -7.704904  | -4.891059 |
| 1BKR | A | ASN | 26  | T | -7.391510  | 9.584298  | -10.990150 | -4.972382 |
| 1BKR | A | PHE | 27  | T | -9.576480  | 13.724182 | -13.093121 | -5.541550 |
| 1BKR | A | THR | 28  | T | -9.953289  | 13.670193 | -13.337741 | -5.518202 |
| 1BKR | A | THR | 29  | G | -10.129300 | 13.039516 | -13.476946 | -5.482537 |
| 1BKR | A | SER | 30  | G | -11.588311 | 13.957181 | -14.914102 | -5.577426 |
| 1BKR | A | TRP | 31  | G | -13.627792 | 16.294615 | -17.172451 | -5.590990 |
| 1BKR | A | ARG | 32  | T | -13.121298 | 12.889421 | -17.623447 | -5.288946 |
| 1BKR | A | ASP | 33  | T | -12.442231 | 14.940971 | -15.601846 | -5.368251 |
| 1BKR | A | GLY | 34  | T | -12.169245 | 15.397770 | -15.370689 | -5.425407 |
| 1BKR | A | MET | 35  | H | -12.145761 | 15.546996 | -15.315713 | -5.411041 |
| 1BKR | A | ALA | 36  | H | -12.046121 | 16.024467 | -15.001436 | -5.321166 |
| 1BKR | A | PHE | 37  | H | -11.944983 | 17.360270 | -14.084706 | -5.228676 |

|      |   |     |     |   |            |           |            |           |
|------|---|-----|-----|---|------------|-----------|------------|-----------|
| 1BKR | A | ASN | 38  | H | -11.696266 | 17.224822 | -13.402947 | -5.025323 |
| 1BKR | A | ALA | 39  | H | -11.161819 | 17.211139 | -12.246580 | -4.818419 |
| 1BKR | A | LEU | 40  | H | -10.857952 | 17.456895 | -12.156467 | -4.997965 |
| 1BKR | A | ILE | 41  | H | -10.781344 | 17.203635 | -12.378983 | -5.043098 |
| 1BKR | A | HIS | 42  | H | -10.722671 | 16.375626 | -12.829264 | -5.047164 |
| 1BKR | A | LYS | 43  | H | -9.697274  | 10.182300 | -13.928025 | -4.898860 |
| 1BKR | A | HIS | 44  | H | -8.950632  | 10.197327 | -12.667498 | -4.637457 |
| 1BKR | A | ARG | 45  | C | -8.591604  | 10.784815 | -11.895643 | -4.444152 |
| 1BKR | A | PRO | 46  | G | -8.062252  | 10.168037 | -11.760823 | -4.580843 |
| 1BKR | A | ASP | 47  | G | -8.061276  | 10.181413 | -11.760788 | -4.582341 |
| 1BKR | A | LEU | 48  | G | -8.083436  | 10.331421 | -11.634708 | -4.575404 |
| 1BKR | A | ILE | 49  | C | -7.815437  | 10.411096 | -11.373868 | -4.652906 |
| 1BKR | A | ASP | 50  | C | -7.104624  | 10.793298 | -10.357990 | -4.889174 |
| 1BKR | A | PHE | 51  | G | -7.168845  | 10.926936 | -10.233483 | -4.919353 |
| 1BKR | A | ASP | 52  | G | -7.164032  | 10.893512 | -10.279149 | -4.922103 |
| 1BKR | A | LYS | 53  | G | -7.164861  | 10.870597 | -10.286200 | -4.921732 |
| 1BKR | A | LEU | 54  | C | -7.255234  | 10.877706 | -10.201643 | -4.957745 |
| 1BKR | A | LYS | 55  | T | -8.250715  | 6.547940  | -14.003903 | -4.755428 |
| 1BKR | A | LYS | 56  | T | -8.145312  | 6.687295  | -13.958372 | -4.802321 |
| 1BKR | A | SER | 57  | T | -8.027370  | 7.122300  | -13.690587 | -4.782315 |
| 1BKR | A | ASN | 58  | T | -8.025252  | 7.149498  | -13.690396 | -4.788545 |
| 1BKR | A | ALA | 59  | H | -8.065816  | 7.124967  | -13.612046 | -4.775089 |
| 1BKR | A | HIS | 60  | H | -8.517280  | 8.719913  | -13.364592 | -4.928226 |
| 1BKR | A | TYR | 61  | H | -8.890010  | 8.890286  | -13.197405 | -4.831092 |
| 1BKR | A | ASN | 62  | H | -10.513268 | 10.059677 | -15.588923 | -5.430703 |
| 1BKR | A | LEU | 63  | H | -11.736824 | 13.443567 | -15.389092 | -5.308098 |
| 1BKR | A | GLN | 64  | H | -12.605718 | 13.299828 | -17.075627 | -5.599836 |
| 1BKR | A | ASN | 65  | H | -13.441441 | 13.032465 | -18.845934 | -5.699802 |
| 1BKR | A | ALA | 66  | H | -13.671647 | 13.989524 | -18.309486 | -5.344261 |
| 1BKR | A | PHE | 67  | H | -13.730024 | 14.604564 | -17.983045 | -5.304754 |
| 1BKR | A | ASN | 68  | H | -11.720260 | 10.065614 | -16.699148 | -5.204776 |
| 1BKR | A | LEU | 69  | H | -9.841205  | 11.004373 | -13.134134 | -4.733856 |
| 1BKR | A | ALA | 70  | H | -9.177219  | 11.763342 | -12.445831 | -4.844129 |
| 1BKR | A | GLU | 71  | H | -6.934264  | 9.565822  | -10.615248 | -5.142741 |
| 1BKR | A | GLN | 72  | H | -6.815442  | 10.018792 | -10.491830 | -5.083793 |
| 1BKR | A | HIS | 73  | H | -6.579972  | 10.753270 | -9.950378  | -4.937807 |
| 1BKR | A | LEU | 74  | H | -6.541213  | 10.877407 | -9.961254  | -4.942553 |
| 1BKR | A | GLY | 75  | C | -6.142650  | 10.615621 | -9.630168  | -4.921072 |
| 1BKR | A | LEU | 76  | C | -6.293444  | 11.151775 | -9.294144  | -4.843604 |
| 1BKR | A | THR | 77  | T | -6.191675  | 11.208763 | -9.285305  | -4.882575 |
| 1BKR | A | LYS | 78  | T | -6.282085  | 11.079225 | -9.392652  | -4.931994 |
| 1BKR | A | LEU | 79  | T | -6.257269  | 11.137294 | -9.344888  | -4.900394 |
| 1BKR | A | LEU | 80  | C | -6.541448  | 11.825464 | -9.380984  | -4.780394 |
| 1BKR | A | ASP | 81  | C | -6.052494  | 11.071822 | -8.668946  | -4.508218 |
| 1BKR | A | PRO | 82  | H | -6.149192  | 10.972847 | -8.552088  | -4.402098 |
| 1BKR | A | GLU | 83  | H | -6.132517  | 10.810451 | -8.640157  | -4.383431 |
| 1BKR | A | ASP | 84  | H | -6.152277  | 10.623222 | -8.692473  | -4.366990 |
| 1BKR | A | ILE | 85  | H | -5.967927  | 9.880984  | -8.755311  | -4.257190 |
| 1BKR | A | SER | 86  | H | -5.824770  | 8.039537  | -9.244826  | -4.086162 |
| 1BKR | A | VAL | 87  | T | -5.322010  | 7.232909  | -9.108888  | -4.087804 |
| 1BKR | A | ASP | 88  | T | -5.299176  | 7.292984  | -9.169408  | -4.127375 |
| 1BKR | A | HIS | 89  | T | -5.290761  | 7.306362  | -9.200035  | -4.139423 |
| 1BKR | A | PRO | 90  | T | -5.368057  | 7.079833  | -9.240791  | -4.139777 |
| 1BKR | A | ASP | 91  | C | -5.563204  | 6.956163  | -9.292434  | -4.189412 |
| 1BKR | A | GLU | 92  | H | -6.769768  | 8.723131  | -11.120663 | -4.834589 |
| 1BKR | A | LYS | 93  | H | -7.182342  | 8.857395  | -11.337098 | -4.531904 |
| 1BKR | A | SER | 94  | H | -7.646544  | 9.298601  | -11.334444 | -4.294190 |
| 1BKR | A | ILE | 95  | H | -7.857572  | 9.957764  | -10.806733 | -4.168804 |
| 1BKR | A | ILE | 96  | H | -8.062790  | 10.531802 | -10.072718 | -3.944721 |
| 1BKR | A | THR | 97  | H | -8.076490  | 10.534020 | -9.993356  | -3.925685 |
| 1BKR | A | TYR | 98  | H | -10.582002 | 16.621314 | -11.540817 | -4.394533 |
| 1BKR | A | VAL | 99  | H | -10.611112 | 16.734789 | -11.474007 | -4.397965 |
| 1BKR | A | VAL | 100 | H | -10.630973 | 16.314895 | -11.943980 | -4.575518 |
| 1BKR | A | THR | 101 | H | -10.804873 | 16.355549 | -12.045180 | -4.689188 |
| 1BKR | A | TYR | 102 | H | -11.380578 | 17.588900 | -12.480692 | -5.089315 |
| 1BKR | A | TYR | 103 | H | -11.086775 | 18.106217 | -13.056796 | -5.851046 |
| 1BKR | A | HIS | 104 | H | -9.978845  | 15.643166 | -12.636860 | -5.935852 |
| 1BKR | A | TYR | 105 | H | -9.097903  | 14.241294 | -11.480958 | -5.302113 |
| 1BKR | A | PHE | 106 | H | -6.994520  | 10.328563 | -8.967819  | -4.103921 |
| 1BKR | A | SER | 107 | H | -6.994520  | 10.328563 | -8.967819  | -4.103921 |
| 1BKR | A | LYS | 108 | C | -6.994520  | 10.328563 | -8.967819  | -4.103921 |
| 1BKR | A | MET | 109 | C | -6.994520  | 10.328563 | -8.967819  | -4.103921 |
| 1BR9 | A | CYS | 1   | C | -5.938481  | 3.111527  | -10.461754 | -3.281209 |
| 1BR9 | A | SER | 2   | C | -5.938481  | 3.111527  | -10.461754 | -3.281209 |
| 1BR9 | A | CYS | 3   | C | -5.938481  | 3.111527  | -10.461754 | -3.281209 |
| 1BR9 | A | SER | 4   | C | -5.938481  | 3.111527  | -10.461754 | -3.281209 |
| 1BR9 | A | PRO | 5   | C | -6.436815  | 4.402745  | -10.696872 | -3.739011 |
| 1BR9 | A | VAL | 6   | C | -7.371480  | 6.146912  | -11.348366 | -4.262803 |
| 1BR9 | A | HIS | 7   | C | -9.508811  | 9.972824  | -13.839186 | -5.554031 |
| 1BR9 | A | PRO | 8   | H | -11.453417 | 14.018759 | -15.288100 | -5.931355 |
| 1BR9 | A | GLN | 9   | H | -12.110104 | 15.645530 | -12.785464 | -4.536957 |

|      |   |     |    |   |            |           |            |           |
|------|---|-----|----|---|------------|-----------|------------|-----------|
| 1BR9 | A | GLN | 10 | H | -13.603561 | 12.209934 | -17.302186 | -5.024257 |
| 1BR9 | A | ALA | 11 | H | -11.577100 | 10.903608 | -14.427185 | -4.384196 |
| 1BR9 | A | PHE | 12 | H | -11.163896 | 10.291144 | -14.948917 | -4.586529 |
| 1BR9 | A | CYS | 13 | H | -9.473067  | 7.151781  | -13.590235 | -4.207117 |
| 1BR9 | A | ASN | 14 | H | -8.954742  | 8.852394  | -12.488599 | -4.091302 |
| 1BR9 | A | ALA | 15 | T | -8.882301  | 9.307438  | -12.199361 | -3.986509 |
| 1BR9 | A | ASP | 16 | T | -8.885127  | 9.325198  | -12.174633 | -3.981698 |
| 1BR9 | A | VAL | 17 | E | -8.887907  | 9.362295  | -12.131149 | -3.969995 |
| 1BR9 | A | VAL | 18 | E | -9.141492  | 10.688246 | -11.389723 | -3.855883 |
| 1BR9 | A | ILE | 19 | E | -10.079004 | 13.235362 | -10.217427 | -3.282762 |
| 1BR9 | A | ARG | 20 | E | -11.085833 | 15.774896 | -11.891308 | -4.017877 |
| 1BR9 | A | ALA | 21 | E | -10.383459 | 12.705726 | -11.710474 | -3.767501 |
| 1BR9 | A | LYS | 22 | E | -9.824187  | 12.749685 | -11.581246 | -4.183113 |
| 1BR9 | A | ALA | 23 | E | -8.866753  | 10.047368 | -11.195697 | -3.895011 |
| 1BR9 | A | VAL | 24 | E | -7.021077  | 9.597673  | -10.215026 | -4.801277 |
| 1BR9 | A | SER | 25 | E | -6.944143  | 9.420455  | -10.365363 | -4.750728 |
| 1BR9 | A | GLU | 26 | E | -6.478042  | 8.585546  | -10.186244 | -4.656314 |
| 1BR9 | A | LYS | 27 | E | -6.463492  | 8.539975  | -10.254911 | -4.658116 |
| 1BR9 | A | GLU | 28 | E | -6.364040  | 8.182703  | -10.597836 | -4.733165 |
| 1BR9 | A | VAL | 29 | E | -6.150759  | 6.959281  | -11.905387 | -5.356037 |
| 1BR9 | A | ASP | 30 | E | -5.494962  | 6.739466  | -13.471676 | -7.346892 |
| 1BR9 | A | SER | 31 | E | -4.670279  | 6.001756  | -12.921264 | -7.589202 |
| 1BR9 | A | GLY | 32 | E | -4.084110  | 5.448690  | -10.659263 | -5.970056 |
| 1BR9 | A | ASN | 33 | E | -2.845993  | 4.238580  | -6.736997  | -4.155855 |
| 1BR9 | A | ASP | 34 | T | -1.583094  | 4.051756  | -5.614043  | -4.248640 |
| 1BR9 | A | ILE | 35 | T | -1.529780  | 4.102553  | -5.697390  | -4.233878 |
| 1BR9 | A | TYR | 36 | T | -1.529434  | 4.105079  | -5.698416  | -4.233797 |
| 1BR9 | A | GLY | 37 | T | -1.533547  | 4.098557  | -5.677323  | -4.232231 |
| 1BR9 | A | ASN | 38 | C | -1.601764  | 4.041166  | -5.532456  | -4.209280 |
| 1BR9 | A | PRO | 39 | E | -3.004326  | 4.326891  | -6.474341  | -3.895344 |
| 1BR9 | A | ILE | 40 | E | -4.484663  | 6.296652  | -12.226039 | -7.349907 |
| 1BR9 | A | LYS | 41 | E | -5.093758  | 6.714233  | -12.699378 | -7.798030 |
| 1BR9 | A | ARG | 42 | E | -9.179998  | 11.503048 | -18.453877 | -9.713707 |
| 1BR9 | A | ILE | 43 | E | -11.811520 | 12.959703 | -16.705824 | -6.181006 |
| 1BR9 | A | GLN | 44 | E | -14.160802 | 16.859021 | -17.189227 | -5.681383 |
| 1BR9 | A | TYR | 45 | E | -13.684847 | 16.870061 | -16.069282 | -5.506413 |
| 1BR9 | A | GLU | 46 | E | -9.893860  | 13.074154 | -11.666183 | -4.890917 |
| 1BR9 | A | ILE | 47 | E | -9.276840  | 12.533765 | -11.584996 | -4.845280 |
| 1BR9 | A | LYS | 48 | E | -8.973999  | 12.431671 | -11.850042 | -5.056589 |
| 1BR9 | A | GLN | 49 | E | -8.964926  | 12.488034 | -11.880014 | -5.070920 |
| 1BR9 | A | ILE | 50 | E | -8.963129  | 12.495920 | -11.888011 | -5.072355 |
| 1BR9 | A | LYS | 51 | E | -9.090768  | 12.351476 | -11.993703 | -5.125240 |
| 1BR9 | A | MET | 52 | E | -9.358820  | 12.684025 | -12.290817 | -5.289827 |
| 1BR9 | A | PHE | 53 | E | -8.663033  | 10.901708 | -10.839219 | -4.380606 |
| 1BR9 | A | LYS | 54 | E | -8.132581  | 8.030153  | -12.564204 | -4.642968 |
| 1BR9 | A | GLY | 55 | C | -5.393783  | 4.654934  | -9.319915  | -4.057224 |
| 1BR9 | A | PRO | 56 | C | -5.363626  | 4.845980  | -9.311084  | -4.045507 |
| 1BR9 | A | GLU | 57 | C | -5.346000  | 4.955610  | -9.331306  | -4.051512 |
| 1BR9 | A | LYS | 58 | C | -5.348022  | 4.936140  | -9.326663  | -4.050561 |
| 1BR9 | A | ASP | 59 | C | -5.351192  | 4.930529  | -9.302802  | -4.046376 |
| 1BR9 | A | ILE | 60 | C | -6.858967  | 8.557101  | -9.477699  | -3.986370 |
| 1BR9 | A | GLU | 61 | C | -7.431288  | 8.639840  | -10.021827 | -4.255110 |
| 1BR9 | A | PHE | 62 | E | -10.734607 | 14.012404 | -13.026338 | -4.859973 |
| 1BR9 | A | ILE | 63 | E | -10.798156 | 15.086396 | -12.443779 | -4.816816 |
| 1BR9 | A | TYR | 64 | E | -11.063749 | 14.958875 | -12.557632 | -4.505535 |
| 1BR9 | A | THR | 65 | E | -9.044171  | 9.464984  | -10.713671 | -3.354754 |
| 1BR9 | A | ALA | 66 | C | -7.436610  | 6.823635  | -9.250124  | -2.758048 |
| 1BR9 | A | PRO | 67 | C | -5.536617  | 4.420561  | -7.778998  | -2.595242 |
| 1BR9 | A | SER | 68 | C | -5.420105  | 4.283149  | -8.168237  | -2.693345 |
| 1BR9 | A | SER | 69 | G | -5.312508  | 4.464829  | -8.567828  | -2.931344 |
| 1BR9 | A | ALA | 70 | G | -5.285406  | 4.549108  | -8.628241  | -2.961927 |
| 1BR9 | A | VAL | 71 | G | -5.279134  | 4.593172  | -8.643292  | -2.983372 |
| 1BR9 | A | CYS | 72 | C | -5.845055  | 5.127019  | -10.151877 | -3.632508 |
| 1BR9 | A | GLY | 73 | C | -6.104983  | 6.045979  | -10.262665 | -3.913164 |
| 1BR9 | A | VAL | 74 | C | -6.648651  | 7.626307  | -9.652653  | -3.575814 |
| 1BR9 | A | SER | 75 | C | -6.697160  | 9.256757  | -8.999387  | -3.666718 |
| 1BR9 | A | LEU | 76 | C | -6.291428  | 9.794087  | -8.551931  | -4.173020 |
| 1BR9 | A | ASP | 77 | C | -5.535997  | 6.497471  | -9.196975  | -4.171069 |
| 1BR9 | A | VAL | 78 | T | -5.364068  | 6.520013  | -9.279182  | -4.208891 |
| 1BR9 | A | GLY | 79 | T | -5.326509  | 6.535402  | -9.480876  | -4.310957 |
| 1BR9 | A | GLY | 80 | T | -5.351487  | 6.380941  | -9.525824  | -4.331786 |
| 1BR9 | A | LYS | 81 | T | -5.441569  | 5.872138  | -9.699235  | -4.332396 |
| 1BR9 | A | LYS | 82 | C | -6.018749  | 6.838750  | -10.112685 | -4.608966 |
| 1BR9 | A | GLU | 83 | E | -6.901381  | 7.483689  | -12.097604 | -5.627913 |
| 1BR9 | A | TYR | 84 | E | -11.483378 | 14.384321 | -14.245824 | -5.262887 |
| 1BR9 | A | LEU | 85 | E | -9.814813  | 13.751241 | -9.919273  | -3.804296 |
| 1BR9 | A | ILE | 86 | E | -8.946400  | 12.484480 | -9.609063  | -3.666642 |
| 1BR9 | A | ALA | 87 | E | -8.827021  | 11.899498 | -10.187288 | -3.777269 |
| 1BR9 | A | GLY | 88 | E | -8.118932  | 8.179069  | -12.008498 | -4.384954 |
| 1BR9 | A | LYS | 89 | E | -7.315854  | 7.865927  | -12.300898 | -5.129925 |
| 1BR9 | A | ALA | 90 | E | -6.764277  | 7.113598  | -11.937501 | -5.110617 |

|      |   |     |     |   |            |           |            |           |
|------|---|-----|-----|---|------------|-----------|------------|-----------|
| 1BR9 | A | GLU | 91  | C | -6.282119  | 6.728054  | -11.667397 | -5.228705 |
| 1BR9 | A | GLY | 92  | T | -6.251741  | 6.853480  | -11.672042 | -5.236484 |
| 1BR9 | A | ASP | 93  | T | -6.269589  | 6.863319  | -11.637938 | -5.254633 |
| 1BR9 | A | GLY | 94  | T | -6.349997  | 6.733596  | -11.526922 | -5.235189 |
| 1BR9 | A | LYS | 95  | E | -6.564619  | 6.753001  | -11.458360 | -5.300344 |
| 1BR9 | A | MET | 96  | E | -7.995769  | 9.269354  | -11.822760 | -5.335166 |
| 1BR9 | A | HIS | 97  | E | -10.557372 | 12.690932 | -13.901827 | -5.014663 |
| 1BR9 | A | ILE | 98  | C | -9.226301  | 10.871051 | -11.710596 | -4.458158 |
| 1BR9 | A | THR | 99  | T | -9.189213  | 11.028139 | -11.774315 | -4.485974 |
| 1BR9 | A | LEU | 100 | T | -9.178070  | 11.095961 | -11.768406 | -4.477927 |
| 1BR9 | A | CYS | 101 | T | -9.139353  | 11.244086 | -11.706107 | -4.431128 |
| 1BR9 | A | ASP | 102 | T | -9.089553  | 11.774981 | -11.317977 | -4.319293 |
| 1BR9 | A | PHE | 103 | E | -9.854396  | 14.769064 | -10.680917 | -4.029096 |
| 1BR9 | A | ILE | 104 | E | -9.396026  | 15.543855 | -10.020628 | -4.341259 |
| 1BR9 | A | VAL | 105 | E | -8.574419  | 12.414884 | -10.036246 | -4.152234 |
| 1BR9 | A | PRO | 106 | E | -8.248564  | 13.006827 | -9.718928  | -4.335686 |
| 1BR9 | A | TRP | 107 | G | -8.249010  | 12.929341 | -9.819601  | -4.382748 |
| 1BR9 | A | ASP | 108 | G | -6.927995  | 8.052917  | -10.000511 | -4.219662 |
| 1BR9 | A | THR | 109 | G | -6.862596  | 8.163701  | -10.198457 | -4.296646 |
| 1BR9 | A | LEU | 110 | C | -6.888000  | 8.021226  | -10.205649 | -4.305812 |
| 1BR9 | A | SER | 111 | C | -6.914752  | 7.753845  | -10.245408 | -4.294112 |
| 1BR9 | A | THR | 112 | H | -6.916417  | 7.737604  | -10.239963 | -4.291623 |
| 1BR9 | A | THR | 113 | H | -8.149797  | 9.636800  | -11.767635 | -4.934582 |
| 1BR9 | A | GLN | 114 | H | -11.353170 | 9.205797  | -16.422004 | -4.962271 |
| 1BR9 | A | LYS | 115 | H | -11.356751 | 9.328148  | -16.317633 | -4.927680 |
| 1BR9 | A | LYS | 116 | H | -9.298168  | 8.199866  | -12.832459 | -4.317705 |
| 1BR9 | A | SER | 117 | H | -9.306312  | 8.206397  | -12.779269 | -4.309540 |
| 1BR9 | A | LEU | 118 | H | -9.306295  | 8.207261  | -12.778984 | -4.309551 |
| 1BR9 | A | ASN | 119 | T | -9.306367  | 8.206704  | -12.778240 | -4.309385 |
| 1BR9 | A | HIS | 120 | T | -9.313854  | 8.176582  | -12.743724 | -4.302416 |
| 1BR9 | A | ARG | 121 | T | -12.873117 | 11.842687 | -16.867904 | -5.043777 |
| 1BR9 | A | TYR | 122 | G | -12.125272 | 11.946963 | -16.032318 | -5.440098 |
| 1BR9 | A | GLN | 123 | G | -8.655710  | 5.935388  | -14.066159 | -5.040221 |
| 1BR9 | A | MET | 124 | G | -7.987618  | 6.102795  | -14.370698 | -5.469378 |
| 1BR9 | A | GLY | 125 | G | -7.551369  | 5.039200  | -14.302095 | -5.291678 |
| 1BR9 | A | CYS | 126 | T | -7.515688  | 5.193898  | -14.276480 | -5.280263 |
| 1BR9 | A | GLU | 127 | T | -7.508654  | 5.234258  | -14.275580 | -5.275581 |
| 1BR9 | A | CYS | 128 | T | -7.600348  | 5.122501  | -14.312575 | -5.315160 |
| 1BR9 | A | LYS | 129 | E | -7.854906  | 4.578374  | -14.205743 | -5.122440 |
| 1BR9 | A | ILE | 130 | E | -9.008266  | 8.382816  | -13.974174 | -5.102747 |
| 1BR9 | A | THR | 131 | E | -9.472895  | 9.651544  | -14.188646 | -4.941139 |
| 1BR9 | A | ARG | 132 | E | -8.289665  | 9.474916  | -11.073444 | -4.174578 |
| 1BR9 | A | CYS | 133 | C | -3.942592  | 4.761012  | -6.051212  | -3.058698 |
| 1BR9 | A | PRO | 134 | C | -2.663495  | 4.333418  | -5.643750  | -3.379913 |
| 1BR9 | A | MET | 135 | T | -2.433789  | 4.309877  | -5.644068  | -3.354189 |
| 1BR9 | A | ILE | 136 | T | -2.390050  | 4.445481  | -5.644328  | -3.346933 |
| 1BR9 | A | PRO | 137 | T | -2.374257  | 4.480899  | -5.673922  | -3.347618 |
| 1BR9 | A | CYS | 138 | T | -2.418934  | 4.449292  | -5.632341  | -3.362139 |
| 1BR9 | A | TYR | 139 | C | -2.945274  | 4.643926  | -5.631690  | -3.229048 |
| 1BR9 | A | ILE | 140 | C | -3.759804  | 6.006678  | -5.916007  | -3.209704 |
| 1BR9 | A | SER | 141 | C | -4.464874  | 5.835008  | -6.935168  | -3.353563 |
| 1BR9 | A | SER | 142 | T | -5.659774  | 7.076125  | -9.241811  | -3.973604 |
| 1BR9 | A | PRO | 143 | T | -5.753071  | 7.027546  | -9.155826  | -3.975788 |
| 1BR9 | A | ASP | 144 | T | -7.184153  | 6.743254  | -10.621855 | -3.844658 |
| 1BR9 | A | GLU | 145 | E | -8.804834  | 7.275343  | -13.264756 | -4.566468 |
| 1BR9 | A | CYS | 146 | E | -11.092977 | 7.549580  | -16.932615 | -5.176212 |
| 1BR9 | A | LEU | 147 | E | -12.795567 | 10.176924 | -18.040643 | -5.501439 |
| 1BR9 | A | TRP | 148 | E | -15.754764 | 14.955592 | -21.022574 | -6.107242 |
| 1BR9 | A | MET | 149 | H | -11.536128 | 11.401031 | -15.827503 | -5.372416 |
| 1BR9 | A | ASP | 150 | H | -11.134739 | 11.068489 | -15.431225 | -5.088137 |
| 1BR9 | A | TRP | 151 | H | -7.640935  | 8.744863  | -9.887033  | -3.984825 |
| 1BR9 | A | VAL | 152 | H | -6.667483  | 7.472191  | -9.683318  | -4.002160 |
| 1BR9 | A | THR | 153 | H | -6.421332  | 7.248583  | -9.873850  | -4.014806 |
| 1BR9 | A | GLU | 154 | H | -6.370776  | 7.222367  | -10.095643 | -4.082074 |
| 1BR9 | A | LYS | 155 | C | -6.007527  | 6.863126  | -10.076852 | -4.191826 |
| 1BR9 | A | ASN | 156 | T | -6.037465  | 6.753230  | -10.124536 | -4.213138 |
| 1BR9 | A | ILE | 157 | T | -6.230726  | 6.594317  | -10.314879 | -4.293146 |
| 1BR9 | A | ASN | 158 | T | -6.398339  | 6.522487  | -10.338432 | -4.376172 |
| 1BR9 | A | GLY | 159 | T | -6.451514  | 6.483645  | -10.126906 | -4.332793 |
| 1BR9 | A | HIS | 160 | H | -8.525281  | 7.915604  | -12.431533 | -4.696959 |
| 1BR9 | A | GLN | 161 | H | -10.979895 | 10.098351 | -15.473883 | -5.220466 |
| 1BR9 | A | ALA | 162 | H | -12.039184 | 10.611975 | -17.129107 | -5.436594 |
| 1BR9 | A | LYS | 163 | H | -12.621459 | 12.877890 | -17.252955 | -5.576385 |
| 1BR9 | A | PHE | 164 | H | -12.738174 | 15.062916 | -15.880086 | -5.267122 |
| 1BR9 | A | PHE | 165 | C | -12.430200 | 14.486336 | -15.678650 | -5.141252 |
| 1BR9 | A | ALA | 166 | E | -12.402695 | 14.280278 | -15.814112 | -5.126993 |
| 1BR9 | A | CYS | 167 | E | -12.117484 | 11.813661 | -16.366853 | -4.928471 |
| 1BR9 | A | ILE | 168 | E | -10.926291 | 8.478812  | -15.447916 | -4.592573 |
| 1BR9 | A | LYS | 169 | E | -8.883263  | 5.098090  | -15.433911 | -5.180493 |
| 1BR9 | A | ARG | 170 | T | -7.232291  | 4.515987  | -11.913179 | -4.055705 |
| 1BR9 | A | SER | 171 | T | -6.830906  | 4.093666  | -12.191695 | -4.187270 |



|      |   |     |     |   |            |           |            |           |
|------|---|-----|-----|---|------------|-----------|------------|-----------|
| 1BR9 | A | ASP | 172 | T | -6.826150  | 4.096297  | -12.218852 | -4.190878 |
| 1BR9 | A | GLY | 173 | T | -6.826616  | 4.093332  | -12.216536 | -4.190642 |
| 1BR9 | A | SER | 174 | C | -6.844728  | 4.065404  | -12.116689 | -4.159311 |
| 1BR9 | A | CYS | 175 | E | -7.241032  | 3.675067  | -12.532133 | -4.329293 |
| 1BR9 | A | ALA | 176 | E | -9.231989  | 8.796155  | -14.314742 | -5.411053 |
| 1BR9 | A | TRP | 177 | E | -7.917848  | 12.086192 | -10.384142 | -5.340353 |
| 1BR9 | A | TYR | 178 | E | -4.908857  | 6.070038  | -7.806319  | -3.972696 |
| 1BR9 | A | ARG | 179 | C | -1.520901  | 3.690475  | -4.006491  | -3.173629 |
| 1BR9 | A | GLY | 180 | C | -1.520901  | 3.690475  | -4.006491  | -3.173629 |
| 1BR9 | A | ALA | 181 | C | -1.520901  | 3.690475  | -4.006491  | -3.173629 |
| 1BR9 | A | ALA | 182 | C | -1.520901  | 3.690475  | -4.006491  | -3.173629 |
| 1BUO | A | MET | 6   | C | 3.310986   | 0.918831  | -3.614749  | -5.455660 |
| 1BUO | A | GLY | 7   | C | 3.310986   | 0.918831  | -3.614749  | -5.455660 |
| 1BUO | A | MET | 8   | C | 3.310986   | 0.918831  | -3.614749  | -5.455660 |
| 1BUO | A | ILE | 9   | C | 3.310986   | 0.918831  | -3.614749  | -5.455660 |
| 1BUO | A | GLN | 10  | C | 1.223035   | 1.189859  | -3.261444  | -3.248465 |
| 1BUO | A | LEU | 11  | C | 1.062922   | 1.041999  | -2.881404  | -3.070814 |
| 1BUO | A | GLN | 12  | C | 0.640941   | 1.246653  | -2.352065  | -2.674995 |
| 1BUO | A | ASN | 13  | C | -0.045878  | 1.409598  | -2.689587  | -2.526321 |
| 1BUO | A | PRO | 14  | C | -0.482544  | 1.023018  | -2.933970  | -2.417411 |
| 1BUO | A | SER | 15  | H | -1.267975  | 1.983884  | -4.123352  | -2.899855 |
| 1BUO | A | HIS | 16  | H | -1.745247  | 3.000191  | -5.263650  | -3.731990 |
| 1BUO | A | PRO | 17  | H | -2.082748  | 3.086599  | -6.419903  | -4.407382 |
| 1BUO | A | THR | 18  | H | -2.213202  | 3.214707  | -6.641387  | -4.675529 |
| 1BUO | A | GLY | 19  | H | -2.454056  | 3.219391  | -7.182211  | -5.088691 |
| 1BUO | A | LEU | 20  | H | -2.950475  | 3.144618  | -7.854431  | -5.405378 |
| 1BUO | A | LEU | 21  | H | -4.514589  | 5.574574  | -10.056731 | -6.280865 |
| 1BUO | A | CYS | 22  | H | -5.108332  | 5.706381  | -11.051598 | -6.798710 |
| 1BUO | A | LYS | 23  | H | -6.740067  | 6.973850  | -13.719181 | -7.917629 |
| 1BUO | A | ALA | 24  | H | -10.154769 | 9.879638  | -18.735113 | -8.476839 |
| 1BUO | A | ASN | 25  | H | -10.312890 | 9.663973  | -19.577373 | -9.230394 |
| 1BUO | A | GLN | 26  | H | -10.785146 | 9.285373  | -19.314227 | -8.365107 |
| 1BUO | A | MET | 27  | H | -11.313866 | 9.689334  | -17.861604 | -6.858364 |
| 1BUO | A | ARG | 28  | H | -9.025864  | 6.007459  | -12.778566 | -4.359544 |
| 1BUO | A | LEU | 29  | H | -6.017799  | 5.358192  | -9.829957  | -4.801864 |
| 1BUO | A | ALA | 30  | H | -5.132125  | 4.881556  | -9.171153  | -4.431144 |
| 1BUO | A | GLY | 31  | T | -5.125342  | 4.885557  | -9.221527  | -4.443409 |
| 1BUO | A | THR | 32  | T | -5.125045  | 4.886617  | -9.223187  | -4.443129 |
| 1BUO | A | LEU | 33  | T | -5.125802  | 4.885403  | -9.218724  | -4.443201 |
| 1BUO | A | CYS | 34  | T | -5.273446  | 4.752435  | -9.050321  | -4.340583 |
| 1BUO | A | ASP | 35  | C | -7.746281  | 5.333297  | -13.549609 | -5.426107 |
| 1BUO | A | VAL | 36  | E | -9.508636  | 7.230153  | -12.728757 | -3.920292 |
| 1BUO | A | VAL | 37  | E | -10.604155 | 8.255282  | -13.294425 | -3.987331 |
| 1BUO | A | ILE | 38  | E | -11.734435 | 11.155105 | -14.008102 | -4.195901 |
| 1BUO | A | MET | 39  | E | -10.906051 | 9.306053  | -14.586020 | -4.940279 |
| 1BUO | A | VAL | 40  | E | -8.717376  | 8.381466  | -11.380753 | -4.231765 |
| 1BUO | A | ASP | 41  | T | -8.714772  | 8.390161  | -11.399523 | -4.236156 |
| 1BUO | A | SER | 42  | T | -8.708827  | 8.414681  | -11.417105 | -4.234738 |
| 1BUO | A | GLN | 43  | T | -8.706434  | 8.441384  | -11.419052 | -4.238843 |
| 1BUO | A | GLU | 44  | E | -8.718249  | 8.434769  | -11.351101 | -4.220653 |
| 1BUO | A | PHE | 45  | E | -10.944771 | 11.636141 | -13.509375 | -4.511474 |
| 1BUO | A | HIS | 46  | E | -11.071795 | 11.912973 | -13.002923 | -4.344507 |
| 1BUO | A | ALA | 47  | E | -11.533184 | 13.127795 | -12.832831 | -4.644807 |
| 1BUO | A | HIS | 48  | C | -12.710474 | 14.480182 | -14.810979 | -5.167859 |
| 1BUO | A | ARG | 49  | H | -12.450083 | 13.002131 | -14.576687 | -4.747553 |
| 1BUO | A | THR | 50  | H | -7.508361  | 9.945659  | -7.665537  | -3.266129 |
| 1BUO | A | VAL | 51  | H | -7.464802  | 10.122437 | -7.789165  | -3.322752 |
| 1BUO | A | LEU | 52  | H | -7.419440  | 10.180892 | -7.906734  | -3.345516 |
| 1BUO | A | ALA | 53  | H | -7.267417  | 9.670245  | -8.438105  | -3.517079 |
| 1BUO | A | CYS | 54  | H | -7.252235  | 9.709754  | -8.536731  | -3.574189 |
| 1BUO | A | THR | 55  | H | -7.872083  | 9.277925  | -10.150900 | -4.144531 |
| 1BUO | A | SER | 56  | C | -7.962062  | 8.759638  | -10.272889 | -4.157712 |
| 1BUO | A | LYS | 57  | H | -8.081411  | 8.285999  | -10.477187 | -4.276890 |
| 1BUO | A | MET | 58  | H | -9.397226  | 11.420895 | -12.328772 | -5.706573 |
| 1BUO | A | PHE | 59  | H | -11.154671 | 14.819120 | -12.040188 | -4.522273 |
| 1BUO | A | GLU | 60  | H | -10.587706 | 12.866152 | -12.218702 | -4.378385 |
| 1BUO | A | ILE | 61  | H | -10.148778 | 12.003237 | -12.035092 | -4.176480 |
| 1BUO | A | LEU | 62  | H | -8.985515  | 10.809241 | -9.818700  | -3.578090 |
| 1BUO | A | PHE | 63  | H | -8.471232  | 8.560677  | -10.495265 | -3.619099 |
| 1BUO | A | HIS | 64  | T | -7.338578  | 4.639710  | -11.817251 | -4.417828 |
| 1BUO | A | ARG | 65  | T | -6.989261  | 4.375009  | -11.693549 | -4.165421 |
| 1BUO | A | ASN | 66  | T | -6.990503  | 4.359759  | -11.695232 | -4.166533 |
| 1BUO | A | SER | 67  | C | -7.008081  | 4.169846  | -11.764766 | -4.187459 |
| 1BUO | A | GLN | 68  | C | -7.037588  | 4.032438  | -11.804872 | -4.215646 |
| 1BUO | A | HIS | 69  | E | -7.462504  | 4.128686  | -11.552546 | -3.860652 |
| 1BUO | A | TYR | 70  | E | -10.278199 | 13.718358 | -12.497152 | -4.976455 |
| 1BUO | A | THR | 71  | E | -8.645154  | 15.242496 | -9.055007  | -5.056386 |
| 1BUO | A | LEU | 72  | E | -8.631860  | 15.288531 | -9.032412  | -5.029833 |
| 1BUO | A | ASP | 73  | T | -8.622021  | 15.256679 | -9.040074  | -5.006428 |
| 1BUO | A | PHE | 74  | T | -8.629519  | 15.259090 | -8.993583  | -4.995430 |
| 1BUO | A | LEU | 75  | T | -8.635007  | 15.212038 | -9.000444  | -4.997778 |

|      |   |     |     |   |            |           |            |           |
|------|---|-----|-----|---|------------|-----------|------------|-----------|
| 1BUO | A | SER | 76  | C | -10.186290 | 14.096760 | -10.568930 | -4.122257 |
| 1BUO | A | PRO | 77  | H | -10.564365 | 13.430735 | -11.123048 | -4.230173 |
| 1BUO | A | LYS | 78  | H | -11.601395 | 11.829348 | -14.445675 | -4.861550 |
| 1BUO | A | THR | 79  | H | -11.622725 | 11.678824 | -14.427473 | -4.835432 |
| 1BUO | A | PHE | 80  | H | -12.938680 | 15.023411 | -15.019546 | -5.485305 |
| 1BUO | A | GLN | 81  | H | -14.989311 | 15.774165 | -18.060359 | -5.654440 |
| 1BUO | A | GLN | 82  | H | -15.591645 | 16.880275 | -19.262908 | -6.196746 |
| 1BUO | A | ILE | 83  | H | -14.375799 | 18.432033 | -13.986809 | -4.767450 |
| 1BUO | A | LEU | 84  | H | -14.372173 | 18.502574 | -13.966579 | -4.770202 |
| 1BUO | A | GLU | 85  | H | -14.272575 | 18.783461 | -14.494901 | -5.107356 |
| 1BUO | A | TYR | 86  | H | -13.698873 | 18.062859 | -14.571803 | -5.240872 |
| 1BUO | A | ALA | 87  | H | -10.601340 | 12.463852 | -11.166839 | -3.947874 |
| 1BUO | A | TYR | 88  | H | -9.148706  | 14.168961 | -8.829213  | -4.323078 |
| 1BUO | A | THR | 89  | H | -5.929192  | 9.454101  | -7.595894  | -4.835736 |
| 1BUO | A | ALA | 90  | C | -4.813948  | 8.791523  | -5.875520  | -3.885646 |
| 1BUO | A | THR | 91  | C | -4.735644  | 8.789661  | -6.139015  | -3.966172 |
| 1BUO | A | LEU | 92  | C | -4.629839  | 8.710528  | -6.187221  | -3.894336 |
| 1BUO | A | GLN | 93  | C | -4.519874  | 8.073309  | -6.519354  | -3.883975 |
| 1BUO | A | ALA | 94  | C | -4.571788  | 7.916554  | -6.459152  | -3.800038 |
| 1BUO | A | LYS | 95  | C | -5.062241  | 6.937990  | -7.614916  | -3.909129 |
| 1BUO | A | ALA | 96  | G | -5.205481  | 6.436063  | -7.509128  | -3.738015 |
| 1BUO | A | GLU | 97  | G | -5.540587  | 5.017202  | -8.328240  | -3.900020 |
| 1BUO | A | ASP | 98  | G | -7.314584  | 6.059683  | -11.822429 | -5.205079 |
| 1BUO | A | LEU | 99  | H | -9.034595  | 6.825883  | -13.084805 | -4.569516 |
| 1BUO | A | ASP | 100 | H | -11.108735 | 9.307489  | -16.593877 | -5.574798 |
| 1BUO | A | ASP | 101 | H | -11.741920 | 10.200360 | -16.265992 | -5.107217 |
| 1BUO | A | LEU | 102 | H | -12.216870 | 12.664520 | -15.361437 | -4.908125 |
| 1BUO | A | LEU | 103 | H | -11.471325 | 13.195713 | -12.359167 | -4.072113 |
| 1BUO | A | TYR | 104 | H | -10.435154 | 12.916264 | -11.747686 | -4.647366 |
| 1BUO | A | ALA | 105 | H | -10.210885 | 13.236739 | -10.433616 | -3.736113 |
| 1BUO | A | ALA | 106 | H | -10.159140 | 13.415872 | -10.669548 | -3.891074 |
| 1BUO | A | GLU | 107 | H | -10.119484 | 13.586399 | -10.708886 | -3.932788 |
| 1BUO | A | ILE | 108 | H | -10.155676 | 13.643086 | -10.675674 | -3.952362 |
| 1BUO | A | LEU | 109 | H | -10.579922 | 14.500908 | -9.713231  | -3.114175 |
| 1BUO | A | GLU | 110 | C | -10.843527 | 15.141766 | -12.766894 | -5.203534 |
| 1BUO | A | ILE | 111 | C | -10.991000 | 15.115362 | -12.677248 | -5.103059 |
| 1BUO | A | GLU | 112 | H | -10.988743 | 14.133969 | -13.348646 | -5.224757 |
| 1BUO | A | TYR | 113 | H | -11.020634 | 14.066478 | -13.459217 | -5.287405 |
| 1BUO | A | LEU | 114 | H | -11.019316 | 14.033911 | -13.514105 | -5.311741 |
| 1BUO | A | GLU | 115 | H | -11.427403 | 13.599135 | -14.618638 | -5.575594 |
| 1BUO | A | GLU | 116 | H | -11.122173 | 13.197144 | -16.506977 | -6.954578 |
| 1BUO | A | GLN | 117 | H | -10.108726 | 12.993154 | -15.214809 | -7.318593 |
| 1BUO | A | CYS | 118 | H | -8.632142  | 11.536769 | -12.825125 | -6.865386 |
| 1BUO | A | LEU | 119 | H | -7.174637  | 10.697490 | -11.361122 | -6.849027 |
| 1BUO | A | LYS | 120 | H | -6.162090  | 8.840150  | -9.775081  | -5.531998 |
| 1BUO | A | MET | 121 | H | -5.834639  | 8.774708  | -9.437271  | -5.259348 |
| 1BUO | A | LEU | 122 | H | -5.018252  | 7.068797  | -6.946727  | -3.606067 |
| 1BUO | A | GLU | 123 | H | -3.589038  | 4.183244  | -4.729628  | -2.617708 |
| 1BUO | A | THR | 124 | H | -3.589038  | 4.183244  | -4.729628  | -2.617708 |
| 1BUO | A | ILE | 125 | H | -3.589038  | 4.183244  | -4.729628  | -2.617708 |
| 1BUO | A | GLN | 126 | C | -3.589038  | 4.183244  | -4.729628  | -2.617708 |
| 1BY2 | A | ALA | 0   | C | -2.992142  | 4.050994  | -6.756895  | -3.523535 |
| 1BY2 | A | VAL | 1   | C | -2.992142  | 4.050994  | -6.756895  | -3.523535 |
| 1BY2 | A | ASN | 2   | T | -2.992142  | 4.050994  | -6.756895  | -3.523535 |
| 1BY2 | A | ASP | 3   | T | -2.992142  | 4.050994  | -6.756895  | -3.523535 |
| 1BY2 | A | GLY | 4   | T | -3.826432  | 4.848553  | -8.481377  | -4.440204 |
| 1BY2 | A | ASP | 5   | E | -4.707937  | 5.777443  | -9.798260  | -5.218956 |
| 1BY2 | A | MET | 6   | E | -6.799727  | 9.891707  | -11.977118 | -6.583349 |
| 1BY2 | A | ARG | 7   | E | -9.803853  | 10.752762 | -14.997387 | -5.657525 |
| 1BY2 | A | LEU | 8   | E | -6.288626  | 6.960494  | -10.308498 | -4.604429 |
| 1BY2 | A | ALA | 9   | E | -5.463053  | 4.514304  | -10.876614 | -4.532418 |
| 1BY2 | A | ASP | 10  | C | -3.490063  | 2.893654  | -8.666698  | -4.353873 |
| 1BY2 | A | GLY | 11  | T | -3.415997  | 2.978420  | -8.848394  | -4.394012 |
| 1BY2 | A | GLY | 12  | T | -3.414098  | 2.988190  | -8.857647  | -4.395322 |
| 1BY2 | A | ALA | 13  | T | -3.418650  | 2.957607  | -8.846637  | -4.393551 |
| 1BY2 | A | THR | 14  | T | -3.433042  | 2.938742  | -8.790804  | -4.390069 |
| 1BY2 | A | ASN | 15  | T | -4.670912  | 3.670510  | -10.210769 | -4.674594 |
| 1BY2 | A | GLN | 16  | E | -6.783962  | 6.123044  | -11.773027 | -4.779818 |
| 1BY2 | A | GLY | 17  | E | -8.473906  | 7.732209  | -13.073993 | -4.856907 |
| 1BY2 | A | ARG | 18  | E | -13.104275 | 12.815124 | -18.304783 | -5.735938 |
| 1BY2 | A | VAL | 19  | E | -13.482003 | 14.274607 | -17.002900 | -5.292626 |
| 1BY2 | A | GLU | 20  | E | -13.429552 | 14.768218 | -16.746264 | -5.236568 |
| 1BY2 | A | ILE | 21  | E | -10.433191 | 16.219794 | -11.490597 | -4.969633 |
| 1BY2 | A | PHE | 22  | E | -9.233492  | 13.863062 | -11.082120 | -4.829088 |
| 1BY2 | A | TYR | 23  | E | -8.647330  | 14.615999 | -10.530519 | -5.068742 |
| 1BY2 | A | ARG | 24  | T | -7.577338  | 11.445599 | -10.605491 | -5.005999 |
| 1BY2 | A | GLY | 25  | T | -7.542794  | 11.492239 | -10.718387 | -5.038959 |
| 1BY2 | A | GLN | 26  | E | -7.546605  | 11.460594 | -10.715972 | -5.039717 |
| 1BY2 | A | TRP | 27  | E | -7.576778  | 11.354829 | -10.702311 | -5.052212 |
| 1BY2 | A | GLY | 28  | E | -7.640488  | 10.927867 | -10.766444 | -5.034133 |
| 1BY2 | A | THR | 29  | E | -9.213220  | 12.324443 | -12.700201 | -5.569178 |

|      |   |     |     |   |            |           |            |           |
|------|---|-----|-----|---|------------|-----------|------------|-----------|
| 1BY2 | A | VAL | 30  | E | -10.973333 | 13.294856 | -14.689007 | -5.221020 |
| 1BY2 | A | CYS | 31  | B | -11.244341 | 12.088362 | -15.449682 | -5.227389 |
| 1BY2 | A | ASP | 32  | T | -11.510321 | 10.420304 | -16.313443 | -5.195643 |
| 1BY2 | A | ASN | 33  | T | -12.563827 | 11.444834 | -18.309896 | -5.538705 |
| 1BY2 | A | LEU | 34  | T | -10.378626 | 13.226023 | -12.452562 | -4.645670 |
| 1BY2 | A | TRP | 35  | T | -10.340769 | 13.195560 | -12.583766 | -4.652972 |
| 1BY2 | A | ASP | 36  | C | -9.678720  | 10.017727 | -13.455751 | -4.461544 |
| 1BY2 | A | LEU | 37  | H | -9.635686  | 9.984508  | -13.561303 | -4.458068 |
| 1BY2 | A | THR | 38  | H | -9.631950  | 9.988995  | -13.572354 | -4.456517 |
| 1BY2 | A | ASP | 39  | H | -9.818246  | 8.762218  | -14.068142 | -4.390620 |
| 1BY2 | A | ALA | 40  | H | -9.796046  | 8.818558  | -14.045639 | -4.363069 |
| 1BY2 | A | SER | 41  | H | -10.786620 | 10.372517 | -14.833612 | -4.311308 |
| 1BY2 | A | VAL | 42  | H | -10.722587 | 10.782520 | -13.926122 | -3.871992 |
| 1BY2 | A | VAL | 43  | H | -10.200952 | 10.699408 | -13.166637 | -3.824354 |
| 1BY2 | A | CYS | 44  | H | -8.882449  | 7.725449  | -12.943262 | -4.099550 |
| 1BY2 | A | ARG | 45  | H | -8.734689  | 8.537542  | -12.639196 | -4.111950 |
| 1BY2 | A | ALA | 46  | H | -8.608499  | 9.392489  | -12.877511 | -4.504753 |
| 1BY2 | A | LEU | 47  | H | -8.581161  | 9.532374  | -12.927825 | -4.574303 |
| 1BY2 | A | GLY | 48  | C | -8.546066  | 9.742950  | -12.976256 | -4.688169 |
| 1BY2 | A | PHE | 49  | C | -8.700725  | 12.690312 | -12.604906 | -5.340223 |
| 1BY2 | A | GLU | 50  | C | -7.521250  | 10.442587 | -11.353898 | -5.302449 |
| 1BY2 | A | ASN | 51  | C | -6.865559  | 10.745283 | -9.909062  | -4.816138 |
| 1BY2 | A | ALA | 52  | E | -6.665791  | 11.015590 | -9.471577  | -4.571380 |
| 1BY2 | A | THR | 53  | E | -5.900875  | 10.615469 | -8.253719  | -4.372631 |
| 1BY2 | A | GLN | 54  | E | -5.899712  | 10.601624 | -8.261246  | -4.368600 |
| 1BY2 | A | ALA | 55  | E | -5.928175  | 10.619083 | -8.115985  | -4.309736 |
| 1BY2 | A | LEU | 56  | E | -6.013922  | 10.555778 | -7.954448  | -4.260652 |
| 1BY2 | A | GLY | 57  | T | -6.073104  | 10.435078 | -7.909734  | -4.291065 |
| 1BY2 | A | ARG | 58  | T | -8.144933  | 9.417984  | -11.653238 | -4.036657 |
| 1BY2 | A | ALA | 59  | T | -7.627380  | 10.143885 | -10.775574 | -4.367258 |
| 1BY2 | A | ALA | 60  | T | -7.319730  | 10.428396 | -10.815958 | -4.809327 |
| 1BY2 | A | PHE | 61  | T | -7.318048  | 10.532258 | -10.845065 | -4.872790 |
| 1BY2 | A | GLY | 62  | T | -5.184602  | 5.077988  | -10.372379 | -4.908443 |
| 1BY2 | A | GLN | 63  | C | -5.090562  | 5.355797  | -10.341669 | -4.859123 |
| 1BY2 | A | GLY | 64  | C | -5.065549  | 5.429963  | -10.330475 | -4.830239 |
| 1BY2 | A | SER | 65  | C | -5.071625  | 5.378241  | -10.325101 | -4.826461 |
| 1BY2 | A | GLY | 66  | C | -5.072236  | 5.374103  | -10.322274 | -4.826100 |
| 1BY2 | A | PRO | 67  | C | -6.040542  | 7.220004  | -10.165041 | -4.481764 |
| 1BY2 | A | ILE | 68  | E | -6.817256  | 7.885787  | -10.165213 | -4.241773 |
| 1BY2 | A | MET | 69  | E | -8.842964  | 11.817551 | -11.327989 | -4.593281 |
| 1BY2 | A | LEU | 70  | E | -10.106064 | 14.916450 | -11.582953 | -4.895334 |
| 1BY2 | A | ASP | 71  | T | -11.846705 | 15.890168 | -15.364520 | -5.688133 |
| 1BY2 | A | GLU | 72  | T | -9.908436  | 11.231621 | -14.017583 | -5.511792 |
| 1BY2 | A | VAL | 73  | T | -8.723225  | 9.193223  | -13.619090 | -5.415480 |
| 1BY2 | A | GLN | 74  | B | -6.567087  | 5.706964  | -12.370978 | -5.327817 |
| 1BY2 | A | CYS | 75  | C | -5.066306  | 5.382078  | -10.375026 | -5.054521 |
| 1BY2 | A | THR | 76  | T | -4.058232  | 4.889653  | -8.859764  | -4.541270 |
| 1BY2 | A | GLY | 77  | T | -4.056702  | 4.891973  | -8.870229  | -4.542208 |
| 1BY2 | A | THR | 78  | T | -4.056845  | 4.891043  | -8.869084  | -4.541938 |
| 1BY2 | A | GLU | 79  | T | -4.065260  | 4.880577  | -8.819215  | -4.530594 |
| 1BY2 | A | ALA | 80  | C | -4.174711  | 4.791365  | -8.535894  | -4.426079 |
| 1BY2 | A | SER | 81  | C | -7.221958  | 7.762886  | -11.999225 | -4.700729 |
| 1BY2 | A | LEU | 82  | G | -7.258770  | 9.664756  | -10.939378 | -4.603161 |
| 1BY2 | A | ALA | 83  | G | -6.859155  | 8.380474  | -11.355929 | -4.731218 |
| 1BY2 | A | ASP | 84  | G | -6.815541  | 8.347460  | -11.485381 | -4.759534 |
| 1BY2 | A | CYS | 85  | C | -6.778596  | 7.741642  | -11.958246 | -4.904000 |
| 1BY2 | A | LYS | 86  | B | -6.728037  | 8.229914  | -11.734726 | -4.932918 |
| 1BY2 | A | SER | 87  | C | -6.853956  | 8.105663  | -11.900026 | -4.987545 |
| 1BY2 | A | LEU | 88  | C | -7.141754  | 9.619341  | -11.633539 | -5.021057 |
| 1BY2 | A | GLY | 89  | T | -7.146907  | 10.128050 | -11.339823 | -4.999964 |
| 1BY2 | A | TRP | 90  | T | -6.850984  | 12.213357 | -9.392499  | -4.817271 |
| 1BY2 | A | LEU | 91  | T | -5.987581  | 7.735052  | -10.310998 | -4.832051 |
| 1BY2 | A | LYS | 92  | T | -5.711431  | 6.875239  | -10.613025 | -4.761404 |
| 1BY2 | A | SER | 93  | C | -5.707919  | 6.789052  | -10.677382 | -4.769468 |
| 1BY2 | A | ASN | 94  | C | -5.704919  | 6.736155  | -10.717826 | -4.772246 |
| 1BY2 | A | CYS | 95  | C | -5.761701  | 6.197521  | -10.904318 | -4.775498 |
| 1BY2 | A | ARG | 96  | C | -6.234308  | 5.629430  | -11.309075 | -4.682679 |
| 1BY2 | A | HIS | 97  | G | -7.656614  | 6.772275  | -13.250012 | -5.041054 |
| 1BY2 | A | GLU | 98  | G | -8.184784  | 6.919600  | -13.400127 | -5.076402 |
| 1BY2 | A | ARG | 99  | G | -12.233742 | 9.486290  | -18.562680 | -5.380280 |
| 1BY2 | A | ASP | 100 | B | -11.443284 | 10.500581 | -15.110797 | -4.318824 |
| 1BY2 | A | ALA | 101 | C | -10.022086 | 10.113861 | -13.201045 | -4.209047 |
| 1BY2 | A | GLY | 102 | E | -9.997349  | 10.252327 | -13.400349 | -4.352114 |
| 1BY2 | A | VAL | 103 | E | -9.777669  | 10.949911 | -14.048057 | -5.092012 |
| 1BY2 | A | VAL | 104 | E | -8.301269  | 9.336818  | -13.742627 | -6.006711 |
| 1BY2 | A | CYS | 105 | E | -5.755776  | 7.195567  | -10.408487 | -5.257684 |
| 1BY2 | A | THR | 106 | C | -3.545855  | 5.982054  | -6.632380  | -4.009157 |
| 1BY2 | A | ASN | 107 | C | -3.545855  | 5.982054  | -6.632380  | -4.009157 |
| 1BY2 | A | GLU | 108 | C | -3.545855  | 5.982054  | -6.632380  | -4.009157 |
| 1BY2 | A | THR | 109 | C | -3.545855  | 5.982054  | -6.632380  | -4.009157 |
| 1BYQ | A | PRO | 11  | C | -0.056100  | 0.187493  | -4.294811  | -3.123981 |

|      |   |     |    |   |            |           |            |           |
|------|---|-----|----|---|------------|-----------|------------|-----------|
| 1BYQ | A | MET | 12 | C | -0.056100  | 0.187493  | -4.294811  | -3.123981 |
| 1BYQ | A | GLU | 13 | C | -0.056100  | 0.187493  | -4.294811  | -3.123981 |
| 1BYQ | A | GLU | 14 | C | -0.056100  | 0.187493  | -4.294811  | -3.123981 |
| 1BYQ | A | GLU | 15 | C | -1.781001  | 1.958661  | -5.478957  | -3.290630 |
| 1BYQ | A | GLU | 16 | C | -2.757012  | 3.480464  | -7.416471  | -4.455605 |
| 1BYQ | A | VAL | 17 | E | -3.061886  | 4.196861  | -7.372348  | -4.775751 |
| 1BYQ | A | GLU | 18 | E | -5.044427  | 6.880942  | -11.189301 | -6.367031 |
| 1BYQ | A | THR | 19 | E | -5.351408  | 7.920586  | -11.049010 | -6.640556 |
| 1BYQ | A | PHE | 20 | E | -7.239395  | 11.185089 | -9.934168  | -4.822908 |
| 1BYQ | A | ALA | 21 | E | -7.676076  | 11.241978 | -8.918781  | -4.106907 |
| 1BYQ | A | PHE | 22 | C | -10.707378 | 15.679589 | -10.714764 | -4.104094 |
| 1BYQ | A | GLN | 23 | C | -11.498306 | 12.283530 | -13.667766 | -3.889952 |
| 1BYQ | A | ALA | 24 | H | -10.242851 | 10.527854 | -11.926392 | -3.598748 |
| 1BYQ | A | GLU | 25 | H | -10.233306 | 10.597486 | -11.970608 | -3.627580 |
| 1BYQ | A | ILE | 26 | H | -10.243188 | 10.595735 | -11.919171 | -3.617287 |
| 1BYQ | A | ALA | 27 | H | -10.241807 | 10.596625 | -11.923615 | -3.615270 |
| 1BYQ | A | GLN | 28 | H | -10.282313 | 10.574303 | -11.798423 | -3.605594 |
| 1BYQ | A | LEU | 29 | H | -12.225987 | 14.882542 | -14.422280 | -4.676220 |
| 1BYQ | A | MET | 30 | H | -12.737399 | 15.148875 | -13.801433 | -3.806244 |
| 1BYQ | A | SER | 31 | H | -11.041165 | 11.064081 | -11.793717 | -2.915034 |
| 1BYQ | A | LEU | 32 | H | -9.577173  | 11.537959 | -9.532236  | -2.858914 |
| 1BYQ | A | ILE | 33 | H | -8.558315  | 10.815677 | -8.958753  | -3.004020 |
| 1BYQ | A | ILE | 34 | H | -8.504692  | 10.846720 | -9.111968  | -3.044824 |
| 1BYQ | A | ASN | 35 | H | -8.423895  | 10.723554 | -9.640644  | -3.269309 |
| 1BYQ | A | THR | 36 | C | -8.422095  | 10.720742 | -9.668292  | -3.285345 |
| 1BYQ | A | PHE | 37 | C | -8.502665  | 10.599898 | -9.732737  | -3.353676 |
| 1BYQ | A | TYR | 38 | T | -9.317613  | 10.427883 | -12.391369 | -4.294000 |
| 1BYQ | A | SER | 39 | T | -9.563926  | 10.042783 | -13.257783 | -4.718281 |
| 1BYQ | A | ASN | 40 | T | -10.788023 | 11.164444 | -13.249884 | -4.121993 |
| 1BYQ | A | LYS | 41 | T | -11.726532 | 12.917722 | -13.591478 | -4.362042 |
| 1BYQ | A | GLU | 42 | H | -13.069890 | 13.444906 | -16.029472 | -4.901706 |
| 1BYQ | A | ILE | 43 | H | -13.083215 | 13.435187 | -15.984213 | -4.895384 |
| 1BYQ | A | PHE | 44 | H | -14.010655 | 18.432887 | -16.361064 | -6.040335 |
| 1BYQ | A | LEU | 45 | H | -14.881653 | 20.339498 | -15.152934 | -4.951490 |
| 1BYQ | A | ARG | 46 | H | -15.244282 | 17.467713 | -17.265479 | -4.836159 |
| 1BYQ | A | GLU | 47 | H | -13.782820 | 13.656896 | -15.278127 | -3.928314 |
| 1BYQ | A | LEU | 48 | H | -13.193203 | 13.150255 | -14.800074 | -3.714022 |
| 1BYQ | A | ILE | 49 | H | -13.122458 | 12.912690 | -15.038986 | -3.722035 |
| 1BYQ | A | SER | 50 | H | -12.791140 | 10.288317 | -17.174648 | -4.348231 |
| 1BYQ | A | ASN | 51 | H | -12.656292 | 9.777319  | -17.353916 | -4.286063 |
| 1BYQ | A | SER | 52 | H | -12.601272 | 9.607506  | -17.243930 | -4.186040 |
| 1BYQ | A | SER | 53 | H | -12.358666 | 9.252696  | -16.568922 | -3.906376 |
| 1BYQ | A | ASP | 54 | H | -10.975292 | 9.199587  | -13.065143 | -3.191951 |
| 1BYQ | A | ALA | 55 | H | -10.893747 | 9.808100  | -13.110729 | -3.343033 |
| 1BYQ | A | LEU | 56 | H | -10.890068 | 9.895430  | -13.077034 | -3.342069 |
| 1BYQ | A | ASP | 57 | H | -10.774165 | 10.045427 | -13.110312 | -3.363508 |
| 1BYQ | A | LYS | 58 | H | -10.766617 | 10.231915 | -13.125423 | -3.427990 |
| 1BYQ | A | ILE | 59 | H | -11.202107 | 12.482139 | -13.759019 | -4.054499 |
| 1BYQ | A | ARG | 60 | H | -10.889584 | 11.422553 | -15.205013 | -4.916764 |
| 1BYQ | A | TYR | 61 | H | -9.430690  | 9.815192  | -12.810483 | -4.404743 |
| 1BYQ | A | GLU | 62 | H | -8.087326  | 8.801647  | -10.375600 | -3.730808 |
| 1BYQ | A | THR | 63 | H | -5.849905  | 5.536489  | -7.335344  | -2.528624 |
| 1BYQ | A | LEU | 64 | T | -5.246171  | 4.930218  | -7.000509  | -2.305018 |
| 1BYQ | A | THR | 65 | T | -5.172683  | 4.978003  | -7.404086  | -2.499466 |
| 1BYQ | A | ASP | 66 | T | -5.118264  | 5.182875  | -7.466356  | -2.554765 |
| 1BYQ | A | PRO | 67 | T | -5.102798  | 5.225833  | -7.486584  | -2.560417 |
| 1BYQ | A | SER | 68 | T | -5.293404  | 5.142950  | -7.581577  | -2.586225 |
| 1BYQ | A | LYS | 69 | T | -5.985732  | 6.410200  | -9.335473  | -3.508732 |
| 1BYQ | A | LEU | 70 | T | -6.040825  | 7.032579  | -9.417392  | -3.772490 |
| 1BYQ | A | ASP | 71 | C | -6.019646  | 5.650259  | -10.430315 | -4.025744 |
| 1BYQ | A | SER | 72 | C | -5.753571  | 6.282323  | -9.489159  | -3.884711 |
| 1BYQ | A | GLY | 73 | C | -5.686104  | 6.445050  | -9.415070  | -3.857140 |
| 1BYQ | A | LYS | 74 | C | -5.688019  | 6.445619  | -9.401956  | -3.853926 |
| 1BYQ | A | GLU | 75 | C | -5.838741  | 6.398109  | -8.959302  | -3.600154 |
| 1BYQ | A | LEU | 76 | C | -6.070732  | 7.470547  | -8.197231  | -3.521387 |
| 1BYQ | A | HIS | 77 | C | -6.967024  | 7.884338  | -8.942760  | -3.631028 |
| 1BYQ | A | ILE | 78 | E | -9.239554  | 11.676099 | -9.684556  | -3.451518 |
| 1BYQ | A | ASN | 79 | E | -11.139860 | 15.173445 | -13.087440 | -4.865034 |
| 1BYQ | A | LEU | 80 | E | -11.819052 | 17.549262 | -11.890614 | -3.960122 |
| 1BYQ | A | ILE | 81 | E | -11.759447 | 15.409885 | -12.914028 | -3.955340 |
| 1BYQ | A | PRO | 82 | E | -10.772204 | 9.093119  | -14.252287 | -4.084802 |
| 1BYQ | A | ASN | 83 | E | -10.503987 | 7.790836  | -15.086479 | -4.304367 |
| 1BYQ | A | LYS | 84 | G | -10.293843 | 7.871319  | -15.037023 | -4.358143 |
| 1BYQ | A | GLN | 85 | G | -10.268622 | 7.953900  | -15.103096 | -4.401779 |
| 1BYQ | A | ASP | 86 | G | -10.262975 | 8.090679  | -15.041774 | -4.401968 |
| 1BYQ | A | ARG | 87 | C | -10.521197 | 8.195950  | -15.355466 | -4.567168 |
| 1BYQ | A | THR | 88 | E | -10.719473 | 10.747054 | -13.952544 | -4.341732 |
| 1BYQ | A | LEU | 89 | E | -11.301021 | 14.993134 | -12.406892 | -4.129093 |
| 1BYQ | A | THR | 90 | E | -11.464534 | 16.469514 | -11.130468 | -3.722028 |
| 1BYQ | A | ILE | 91 | E | -11.253978 | 15.150384 | -11.538891 | -3.701331 |
| 1BYQ | A | VAL | 92 | E | -11.047809 | 14.374391 | -11.841333 | -3.691317 |

|      |   |     |     |   |            |           |            |           |
|------|---|-----|-----|---|------------|-----------|------------|-----------|
| 1BYQ | A | ASP | 93  | E | -10.258716 | 11.642470 | -12.083386 | -3.971122 |
| 1BYQ | A | THR | 94  | C | -9.507555  | 12.173606 | -10.993901 | -4.061090 |
| 1BYQ | A | GLY | 95  | C | -8.679673  | 12.322445 | -11.568988 | -5.112383 |
| 1BYQ | A | ILE | 96  | C | -8.678856  | 12.341607 | -11.569609 | -5.118277 |
| 1BYQ | A | GLY | 97  | C | -8.664347  | 12.320970 | -11.595653 | -5.103173 |
| 1BYQ | A | MET | 98  | C | -8.695216  | 12.372250 | -11.590677 | -5.163938 |
| 1BYQ | A | THR | 99  | C | -8.791042  | 12.338329 | -11.821479 | -5.339101 |
| 1BYQ | A | LYS | 100 | H | -10.159840 | 12.018612 | -12.600835 | -4.213451 |
| 1BYQ | A | ALA | 101 | H | -9.762515  | 11.570787 | -11.785714 | -3.822087 |
| 1BYQ | A | ASP | 102 | H | -9.867743  | 11.576186 | -11.629071 | -3.702516 |
| 1BYQ | A | LEU | 103 | H | -9.873470  | 11.666990 | -11.537067 | -3.675886 |
| 1BYQ | A | ILE | 104 | H | -9.875528  | 11.635270 | -11.501069 | -3.633731 |
| 1BYQ | A | ASN | 105 | H | -9.605179  | 10.958878 | -12.479758 | -4.172703 |
| 1BYQ | A | ASN | 106 | H | -9.790123  | 10.412423 | -13.366922 | -4.425933 |
| 1BYQ | A | LEU | 107 | H | -9.036063  | 10.009355 | -10.819772 | -3.373828 |
| 1BYQ | A | GLY | 108 | C | -8.394717  | 8.435128  | -10.701444 | -3.287359 |
| 1BYQ | A | THR | 109 | C | -7.800779  | 7.391097  | -9.929999  | -2.871001 |
| 1BYQ | A | ILE | 110 | C | -6.588077  | 5.849528  | -10.460347 | -3.802722 |
| 1BYQ | A | ALA | 111 | C | -6.524345  | 5.988481  | -10.427674 | -3.756746 |
| 1BYQ | A | LYS | 112 | C | -6.509013  | 6.027971  | -10.429938 | -3.751715 |
| 1BYQ | A | SER | 113 | C | -6.271265  | 6.572737  | -9.563148  | -3.469176 |
| 1BYQ | A | GLY | 114 | H | -6.299482  | 6.574502  | -9.565189  | -3.511263 |
| 1BYQ | A | THR | 115 | H | -6.754677  | 7.671772  | -8.428452  | -3.011880 |
| 1BYQ | A | LYS | 116 | H | -6.851202  | 7.760525  | -8.122871  | -2.952207 |
| 1BYQ | A | ALA | 117 | H | -6.889998  | 7.733275  | -7.973896  | -2.922616 |
| 1BYQ | A | PHE | 118 | H | -9.710042  | 14.583140 | -9.974393  | -3.808658 |
| 1BYQ | A | MET | 119 | H | -10.116677 | 14.772861 | -11.336387 | -4.191896 |
| 1BYQ | A | GLU | 120 | H | -7.851098  | 8.761952  | -10.315299 | -3.791829 |
| 1BYQ | A | ALA | 121 | H | -7.054126  | 8.150109  | -8.837053  | -3.104509 |
| 1BYQ | A | LEU | 122 | H | -6.177011  | 7.814838  | -7.324361  | -2.767572 |
| 1BYQ | A | GLN | 123 | H | -5.514214  | 5.577672  | -7.931956  | -2.903809 |
| 1BYQ | A | ALA | 124 | C | -5.365192  | 6.066607  | -7.668526  | -2.856590 |
| 1BYQ | A | GLY | 125 | C | -5.365322  | 6.065447  | -7.681348  | -2.866493 |
| 1BYQ | A | ALA | 126 | C | -5.391144  | 5.982059  | -7.653527  | -2.866702 |
| 1BYQ | A | ASP | 127 | C | -5.527037  | 5.535545  | -7.853400  | -2.917836 |
| 1BYQ | A | ILE | 128 | G | -6.216876  | 7.839479  | -7.031812  | -2.803382 |
| 1BYQ | A | SER | 129 | G | -7.783489  | 8.807024  | -11.162417 | -4.354291 |
| 1BYQ | A | MET | 130 | G | -8.041875  | 11.954521 | -9.886834  | -4.324621 |
| 1BYQ | A | ILE | 131 | G | -7.641357  | 11.699288 | -9.257241  | -4.038076 |
| 1BYQ | A | GLY | 132 | G | -7.276086  | 10.973511 | -8.778402  | -3.702621 |
| 1BYQ | A | GLN | 133 | G | -7.193718  | 11.006931 | -8.737302  | -3.651812 |
| 1BYQ | A | PHE | 134 | G | -7.216792  | 11.084602 | -8.657731  | -3.657468 |
| 1BYQ | A | GLY | 135 | C | -7.344987  | 10.754288 | -8.423556  | -3.446762 |
| 1BYQ | A | VAL | 136 | C | -7.560377  | 10.461935 | -8.313238  | -3.318852 |
| 1BYQ | A | GLY | 137 | G | -8.379059  | 11.400772 | -8.553408  | -3.342389 |
| 1BYQ | A | PHE | 138 | G | -10.666374 | 17.083848 | -10.730240 | -4.466900 |
| 1BYQ | A | TYR | 139 | G | -10.942604 | 17.026311 | -11.623031 | -5.062190 |
| 1BYQ | A | SER | 140 | G | -12.760507 | 19.127857 | -12.157337 | -4.228553 |
| 1BYQ | A | ALA | 141 | G | -12.471848 | 19.493723 | -10.620321 | -3.597988 |
| 1BYQ | A | TYR | 142 | G | -12.563956 | 19.671844 | -10.440792 | -3.527348 |
| 1BYQ | A | LEU | 143 | G | -11.323864 | 15.964644 | -10.883957 | -3.859670 |
| 1BYQ | A | VAL | 144 | C | -10.681242 | 14.518059 | -10.628914 | -3.546458 |
| 1BYQ | A | ALA | 145 | E | -10.460619 | 14.135402 | -11.679776 | -4.093449 |
| 1BYQ | A | GLU | 146 | E | -10.396940 | 14.082915 | -11.779632 | -4.119094 |
| 1BYQ | A | LYS | 147 | E | -10.310057 | 14.282286 | -11.560365 | -4.007914 |
| 1BYQ | A | VAL | 148 | E | -10.177754 | 14.226545 | -10.934902 | -3.663052 |
| 1BYQ | A | THR | 149 | E | -10.363920 | 14.394527 | -11.141164 | -3.768494 |
| 1BYQ | A | VAL | 150 | E | -10.545759 | 14.770077 | -10.124296 | -3.218037 |
| 1BYQ | A | ILE | 151 | E | -10.646670 | 14.794083 | -9.746214  | -3.041645 |
| 1BYQ | A | THR | 152 | E | -10.800159 | 14.460247 | -9.741594  | -2.989160 |
| 1BYQ | A | LYS | 153 | E | -11.521898 | 10.071843 | -15.317979 | -4.541212 |
| 1BYQ | A | HIS | 154 | T | -10.809421 | 8.739300  | -15.222159 | -4.693600 |
| 1BYQ | A | ASN | 155 | T | -10.690843 | 8.688713  | -15.877957 | -5.033042 |
| 1BYQ | A | ASP | 156 | T | -10.641926 | 8.986564  | -15.839263 | -5.052771 |
| 1BYQ | A | ASP | 157 | T | -10.649285 | 8.978303  | -15.827177 | -5.058297 |
| 1BYQ | A | GLU | 158 | C | -10.765733 | 8.922625  | -15.886410 | -5.141415 |
| 1BYQ | A | GLN | 159 | E | -11.451943 | 9.907544  | -17.681082 | -6.113203 |
| 1BYQ | A | TYR | 160 | E | -12.120475 | 12.524250 | -15.429184 | -5.265675 |
| 1BYQ | A | ALA | 161 | E | -13.831252 | 14.401443 | -16.194554 | -4.634255 |
| 1BYQ | A | TRP | 162 | E | -13.901239 | 14.147211 | -15.650506 | -4.018066 |
| 1BYQ | A | GLU | 163 | E | -9.642839  | 7.411929  | -12.614879 | -3.671158 |
| 1BYQ | A | SER | 164 | E | -7.079415  | 5.501552  | -9.619127  | -3.123434 |
| 1BYQ | A | SER | 165 | C | -4.948548  | 5.791521  | -8.566198  | -4.119389 |
| 1BYQ | A | ALA | 166 | T | -4.941366  | 5.849106  | -8.559768  | -4.110466 |
| 1BYQ | A | GLY | 167 | T | -4.941092  | 5.851397  | -8.560637  | -4.110197 |
| 1BYQ | A | GLY | 168 | T | -4.941303  | 5.850857  | -8.559193  | -4.110352 |
| 1BYQ | A | SER | 169 | E | -4.957362  | 5.861083  | -8.531064  | -4.137617 |
| 1BYQ | A | PHE | 170 | E | -7.537273  | 10.577563 | -8.118449  | -3.382429 |
| 1BYQ | A | THR | 171 | E | -9.486930  | 10.819270 | -10.451509 | -3.528878 |
| 1BYQ | A | VAL | 172 | E | -12.058712 | 14.084177 | -16.532342 | -6.274594 |
| 1BYQ | A | ARG | 173 | E | -9.329738  | 10.151052 | -17.877326 | -9.174426 |

|      |   |     |     |   |            |           |            |           |
|------|---|-----|-----|---|------------|-----------|------------|-----------|
| 1BYQ | A | THR | 174 | E | -7.739734  | 7.660142  | -12.624399 | -5.318473 |
| 1BYQ | A | ASP | 175 | C | -3.962245  | 3.938367  | -10.005712 | -5.692564 |
| 1BYQ | A | THR | 176 | C | -3.865016  | 4.245947  | -10.139912 | -5.746227 |
| 1BYQ | A | GLY | 177 | C | -3.758122  | 4.266151  | -9.770212  | -5.389073 |
| 1BYQ | A | GLU | 178 | C | -3.758133  | 4.265963  | -9.769706  | -5.388687 |
| 1BYQ | A | PRO | 179 | C | -3.758787  | 4.262443  | -9.766957  | -5.389037 |
| 1BYQ | A | MET | 180 | C | -4.489902  | 5.054480  | -9.173765  | -4.636925 |
| 1BYQ | A | GLY | 181 | C | -4.826806  | 4.358421  | -7.873142  | -3.566196 |
| 1BYQ | A | ARG | 182 | C | -9.288491  | 9.046714  | -12.519686 | -4.243521 |
| 1BYQ | A | GLY | 183 | E | -9.568257  | 11.829707 | -11.134337 | -3.957892 |
| 1BYQ | A | THR | 184 | E | -9.874600  | 14.133787 | -9.682401  | -3.676649 |
| 1BYQ | A | LYS | 185 | E | -9.842915  | 14.437163 | -9.681038  | -3.724885 |
| 1BYQ | A | VAL | 186 | E | -9.838707  | 14.516818 | -9.631485  | -3.706601 |
| 1BYQ | A | ILE | 187 | E | -9.838854  | 14.521244 | -9.627531  | -3.706070 |
| 1BYQ | A | LEU | 188 | E | -10.961068 | 17.865064 | -10.408342 | -4.117997 |
| 1BYQ | A | HIS | 189 | E | -11.114206 | 16.440082 | -12.040762 | -4.591209 |
| 1BYQ | A | LEU | 190 | E | -11.004999 | 11.526188 | -15.280885 | -5.234713 |
| 1BYQ | A | LYS | 191 | T | -9.381403  | 8.261146  | -13.701900 | -4.852334 |
| 1BYQ | A | GLU | 192 | T | -8.578710  | 8.020267  | -12.651883 | -4.613557 |
| 1BYQ | A | ASP | 193 | T | -8.577872  | 8.026942  | -12.655112 | -4.614324 |
| 1BYQ | A | GLN | 194 | T | -8.579898  | 8.016020  | -12.649025 | -4.614950 |
| 1BYQ | A | THR | 195 | G | -8.585989  | 7.998555  | -12.607674 | -4.602256 |
| 1BYQ | A | GLU | 196 | G | -8.753358  | 7.961119  | -12.295895 | -4.532950 |
| 1BYQ | A | TYR | 197 | G | -12.072830 | 14.647045 | -14.827104 | -5.181948 |
| 1BYQ | A | LEU | 198 | G | -12.569369 | 16.283531 | -15.097931 | -5.293003 |
| 1BYQ | A | GLU | 199 | C | -12.547616 | 15.753014 | -15.215819 | -5.171030 |
| 1BYQ | A | GLU | 200 | H | -12.757861 | 13.914097 | -15.511069 | -4.416026 |
| 1BYQ | A | ARG | 201 | H | -12.596343 | 12.126319 | -15.715785 | -4.066265 |
| 1BYQ | A | ARG | 202 | H | -12.691578 | 11.317267 | -16.201670 | -4.071396 |
| 1BYQ | A | ILE | 203 | H | -11.215263 | 14.218813 | -11.008762 | -3.430682 |
| 1BYQ | A | LYS | 204 | H | -9.698046  | 10.911517 | -10.601458 | -3.345126 |
| 1BYQ | A | GLU | 205 | H | -9.572712  | 10.710106 | -11.375863 | -3.659158 |
| 1BYQ | A | ILE | 206 | H | -9.549059  | 10.747179 | -11.444652 | -3.672074 |
| 1BYQ | A | VAL | 207 | H | -9.539683  | 10.738086 | -11.494733 | -3.678089 |
| 1BYQ | A | LYS | 208 | H | -9.568272  | 10.506119 | -11.586266 | -3.700514 |
| 1BYQ | A | LYS | 209 | H | -10.355437 | 10.115965 | -14.546373 | -4.734346 |
| 1BYQ | A | HIS | 210 | H | -10.254569 | 10.957322 | -14.367867 | -5.083479 |
| 1BYQ | A | SER | 211 | H | -8.036436  | 8.003039  | -10.833928 | -3.958744 |
| 1BYQ | A | GLN | 212 | T | -7.926960  | 8.601816  | -10.677575 | -3.958524 |
| 1BYQ | A | PHE | 213 | T | -7.392128  | 10.339329 | -8.835184  | -3.621797 |
| 1BYQ | A | ILE | 214 | T | -6.892531  | 11.991070 | -7.041215  | -3.341741 |
| 1BYQ | A | GLY | 215 | C | -6.690771  | 11.764294 | -7.614114  | -3.616207 |
| 1BYQ | A | TYR | 216 | C | -6.753851  | 12.194702 | -7.261182  | -3.580960 |
| 1BYQ | A | PRO | 217 | C | -6.717846  | 12.479471 | -7.214898  | -3.639429 |
| 1BYQ | A | ILE | 218 | E | -6.513182  | 13.582935 | -6.477748  | -3.769026 |
| 1BYQ | A | THR | 219 | E | -6.187754  | 12.119509 | -6.231801  | -3.464993 |
| 1BYQ | A | LEU | 220 | E | -4.986245  | 10.690853 | -5.676388  | -3.690144 |
| 1BYQ | A | PHE | 221 | C | -4.986245  | 10.690853 | -5.676388  | -3.690144 |
| 1BYQ | A | VAL | 222 | C | -4.986245  | 10.690853 | -5.676388  | -3.690144 |
| 1BYQ | A | GLU | 223 | C | -4.986245  | 10.690853 | -5.676388  | -3.690144 |
| 1CBS | A | PRO | 1   | C | -10.672284 | 10.526783 | -14.211039 | -4.410769 |
| 1CBS | A | ASN | 2   | C | -10.672284 | 10.526783 | -14.211039 | -4.410769 |
| 1CBS | A | PHE | 3   | C | -10.672284 | 10.526783 | -14.211039 | -4.410769 |
| 1CBS | A | SER | 4   | C | -10.672284 | 10.526783 | -14.211039 | -4.410769 |
| 1CBS | A | GLY | 5   | E | -11.031583 | 13.582464 | -14.490604 | -5.414432 |
| 1CBS | A | ASN | 6   | E | -10.696065 | 15.799087 | -12.617229 | -5.181321 |
| 1CBS | A | TRP | 7   | E | -10.251650 | 16.144012 | -11.575005 | -4.794798 |
| 1CBS | A | LYS | 8   | E | -8.038348  | 11.442182 | -9.830272  | -4.255928 |
| 1CBS | A | ILE | 9   | E | -7.598485  | 10.598483 | -10.139812 | -4.216802 |
| 1CBS | A | ILE | 10  | E | -7.405162  | 10.035219 | -10.657659 | -4.350376 |
| 1CBS | A | ARG | 11  | E | -7.405846  | 10.022991 | -10.659834 | -4.349968 |
| 1CBS | A | SER | 12  | E | -7.408309  | 9.995643  | -10.660981 | -4.349859 |
| 1CBS | A | GLU | 13  | E | -7.651385  | 9.321601  | -11.108880 | -4.405564 |
| 1CBS | A | ASN | 14  | T | -8.154402  | 8.652313  | -12.035022 | -4.708441 |
| 1CBS | A | PHE | 15  | H | -10.938840 | 14.068665 | -14.865748 | -5.583996 |
| 1CBS | A | GLU | 16  | H | -11.170720 | 15.198804 | -14.912743 | -5.781319 |
| 1CBS | A | GLU | 17  | H | -10.880173 | 15.307864 | -13.708203 | -5.256871 |
| 1CBS | A | LEU | 18  | H | -10.927924 | 16.008572 | -13.076178 | -5.025038 |
| 1CBS | A | LEU | 19  | H | -9.829520  | 13.386911 | -11.932393 | -4.650146 |
| 1CBS | A | LYS | 20  | H | -8.535570  | 11.108705 | -11.204132 | -4.489032 |
| 1CBS | A | VAL | 21  | H | -8.097841  | 10.631448 | -11.053784 | -4.350428 |
| 1CBS | A | LEU | 22  | H | -7.795669  | 9.526042  | -11.566875 | -4.422355 |
| 1CBS | A | GLY | 23  | C | -5.683063  | 4.027794  | -10.657628 | -4.201723 |
| 1CBS | A | VAL | 24  | C | -5.426597  | 4.254814  | -10.506310 | -4.083361 |
| 1CBS | A | ASN | 25  | C | -5.423726  | 4.246231  | -10.526191 | -4.085674 |
| 1CBS | A | VAL | 26  | H | -5.425252  | 4.219357  | -10.532591 | -4.085249 |
| 1CBS | A | MET | 27  | H | -5.429340  | 4.193823  | -10.520939 | -4.081999 |
| 1CBS | A | LEU | 28  | H | -6.022497  | 4.765646  | -10.342011 | -3.891949 |
| 1CBS | A | ARG | 29  | H | -7.954229  | 6.813681  | -13.245110 | -4.573086 |
| 1CBS | A | LYS | 30  | H | -7.677176  | 6.704522  | -11.337692 | -3.469374 |
| 1CBS | A | ILE | 31  | H | -7.708151  | 6.893951  | -11.048600 | -3.335486 |

|      |   |     |     |   |            |           |            |           |
|------|---|-----|-----|---|------------|-----------|------------|-----------|
| 1CBS | A | ALA | 32  | H | -7.708412  | 6.924622  | -11.007125 | -3.319251 |
| 1CBS | A | VAL | 33  | H | -7.713676  | 6.854236  | -10.866460 | -3.200454 |
| 1CBS | A | ALA | 34  | H | -7.696001  | 6.831035  | -10.942026 | -3.209234 |
| 1CBS | A | ALA | 35  | H | -8.712345  | 8.205691  | -12.252530 | -3.452116 |
| 1CBS | A | ALA | 36  | H | -9.092350  | 7.922913  | -13.362858 | -3.733378 |
| 1CBS | A | SER | 37  | T | -9.130219  | 7.835286  | -13.561997 | -3.819659 |
| 1CBS | A | LYS | 38  | T | -9.312939  | 7.958593  | -13.754899 | -3.932665 |
| 1CBS | A | PRO | 39  | T | -9.713855  | 9.499386  | -13.633511 | -4.038971 |
| 1CBS | A | ALA | 40  | E | -9.723302  | 9.833367  | -13.544664 | -4.105773 |
| 1CBS | A | VAL | 41  | E | -9.906278  | 10.465992 | -13.243228 | -4.133293 |
| 1CBS | A | GLU | 42  | E | -10.524878 | 12.617217 | -13.798459 | -4.673020 |
| 1CBS | A | ILE | 43  | E | -9.018623  | 9.583428  | -13.728750 | -5.456736 |
| 1CBS | A | LYS | 44  | E | -7.908683  | 6.572015  | -14.295466 | -5.663092 |
| 1CBS | A | GLN | 45  | E | -6.606661  | 5.297190  | -12.856218 | -5.329817 |
| 1CBS | A | GLU | 46  | E | -6.368055  | 6.680519  | -11.977731 | -5.164331 |
| 1CBS | A | GLY | 47  | T | -6.368081  | 6.680328  | -11.977516 | -5.164304 |
| 1CBS | A | ASP | 48  | T | -6.374472  | 6.651293  | -11.958358 | -5.160602 |
| 1CBS | A | THR | 49  | E | -6.413477  | 6.692274  | -11.792594 | -5.124095 |
| 1CBS | A | PHE | 50  | E | -7.022218  | 9.470218  | -10.206151 | -4.830502 |
| 1CBS | A | TYR | 51  | E | -12.889380 | 14.800310 | -16.683436 | -5.647200 |
| 1CBS | A | ILE | 52  | E | -12.004477 | 14.606277 | -15.353790 | -5.611756 |
| 1CBS | A | LYS | 53  | E | -10.363871 | 11.058774 | -15.078284 | -5.593963 |
| 1CBS | A | THR | 54  | E | -8.468865  | 9.381300  | -11.950149 | -4.578239 |
| 1CBS | A | SER | 55  | E | -8.210501  | 9.146677  | -12.242664 | -4.611219 |
| 1CBS | A | THR | 56  | E | -6.299972  | 9.126920  | -9.371919  | -4.650720 |
| 1CBS | A | THR | 57  | T | -6.249348  | 8.984724  | -9.570649  | -4.639963 |
| 1CBS | A | VAL | 58  | T | -6.218650  | 8.979835  | -9.679854  | -4.651432 |
| 1CBS | A | ARG | 59  | E | -6.229971  | 8.976241  | -9.643482  | -4.655191 |
| 1CBS | A | THR | 60  | E | -5.944727  | 9.646419  | -9.495094  | -4.838988 |
| 1CBS | A | THR | 61  | E | -6.386077  | 10.245925 | -9.769769  | -5.046953 |
| 1CBS | A | GLU | 62  | E | -6.450354  | 10.576487 | -9.537439  | -5.107747 |
| 1CBS | A | ILE | 63  | E | -6.497099  | 10.712992 | -9.352697  | -5.126512 |
| 1CBS | A | ASN | 64  | E | -6.497507  | 10.726656 | -9.342619  | -5.126288 |
| 1CBS | A | PHE | 65  | E | -8.548899  | 13.353736 | -10.822454 | -4.834043 |
| 1CBS | A | LYS | 66  | E | -5.804215  | 9.489272  | -8.661046  | -4.829889 |
| 1CBS | A | VAL | 67  | T | -5.786608  | 9.583067  | -8.691180  | -4.832529 |
| 1CBS | A | GLY | 68  | T | -5.750823  | 9.724742  | -8.783893  | -4.872626 |
| 1CBS | A | GLU | 69  | E | -5.751128  | 9.722037  | -8.783498  | -4.873007 |
| 1CBS | A | GLU | 70  | E | -5.754840  | 9.702851  | -8.772363  | -4.873994 |
| 1CBS | A | PHE | 71  | E | -7.198529  | 12.235984 | -10.115705 | -5.330274 |
| 1CBS | A | GLU | 72  | E | -7.425931  | 12.014615 | -10.310255 | -5.521550 |
| 1CBS | A | GLU | 73  | E | -10.191408 | 13.461801 | -14.299508 | -6.120313 |
| 1CBS | A | GLN | 74  | E | -10.281154 | 10.340246 | -15.890843 | -5.953056 |
| 1CBS | A | THR | 75  | T | -9.951123  | 10.118914 | -15.320396 | -5.628877 |
| 1CBS | A | VAL | 76  | T | -9.848819  | 9.970942  | -15.357730 | -5.519838 |
| 1CBS | A | ASP | 77  | T | -9.810993  | 9.784047  | -15.465997 | -5.493906 |
| 1CBS | A | GLY | 78  | T | -9.809787  | 9.781498  | -15.471816 | -5.493415 |
| 1CBS | A | ARG | 79  | C | -10.074376 | 9.882965  | -15.276594 | -5.293454 |
| 1CBS | A | PRO | 80  | E | -10.666868 | 8.805683  | -16.236329 | -5.099993 |
| 1CBS | A | CYS | 81  | E | -11.163091 | 8.843911  | -17.163910 | -5.382144 |
| 1CBS | A | LYS | 82  | E | -11.282747 | 12.356557 | -15.297229 | -5.188403 |
| 1CBS | A | SER | 83  | E | -10.993552 | 13.056889 | -14.277571 | -4.854517 |
| 1CBS | A | LEU | 84  | E | -10.035506 | 13.635930 | -12.044299 | -4.526914 |
| 1CBS | A | VAL | 85  | E | -9.672463  | 12.968926 | -12.198473 | -4.511741 |
| 1CBS | A | LYS | 86  | E | -8.438292  | 10.280592 | -11.870617 | -4.744761 |
| 1CBS | A | TRP | 87  | E | -8.132542  | 9.851866  | -12.109949 | -4.795409 |
| 1CBS | A | GLU | 88  | E | -7.375560  | 9.196578  | -11.762855 | -5.074163 |
| 1CBS | A | SER | 89  | E | -7.377075  | 9.169892  | -11.783637 | -5.083958 |
| 1CBS | A | GLU | 90  | T | -7.381621  | 9.150555  | -11.783036 | -5.091456 |
| 1CBS | A | ASN | 91  | T | -7.476031  | 9.020892  | -11.775258 | -5.145557 |
| 1CBS | A | LYS | 92  | E | -7.561005  | 8.989332  | -11.668862 | -5.188752 |
| 1CBS | A | MET | 93  | E | -10.163892 | 12.169623 | -14.739791 | -5.820093 |
| 1CBS | A | VAL | 94  | E | -10.888269 | 13.793130 | -15.201038 | -6.082207 |
| 1CBS | A | CYS | 95  | E | -11.534794 | 12.628021 | -17.400656 | -6.433860 |
| 1CBS | A | GLU | 96  | E | -11.266143 | 12.698317 | -17.398146 | -6.593857 |
| 1CBS | A | GLN | 97  | E | -10.898021 | 11.399126 | -16.484650 | -5.941800 |
| 1CBS | A | LYS | 98  | E | -6.074752  | 8.007962  | -9.361185  | -4.529959 |
| 1CBS | A | LEU | 99  | E | -4.613055  | 7.082388  | -7.965300  | -4.351167 |
| 1CBS | A | LEU | 100 | T | -2.446813  | 5.605535  | -6.092094  | -4.517046 |
| 1CBS | A | LYS | 101 | T | -2.396499  | 5.560656  | -6.252934  | -4.508390 |
| 1CBS | A | GLY | 102 | T | -2.393095  | 5.558674  | -6.276585  | -4.509471 |
| 1CBS | A | GLU | 103 | C | -2.394272  | 5.553344  | -6.270296  | -4.509139 |
| 1CBS | A | GLY | 104 | C | -2.407683  | 5.516051  | -6.229660  | -4.509654 |
| 1CBS | A | PRO | 105 | C | -3.860368  | 4.889481  | -8.031992  | -4.286904 |
| 1CBS | A | LYS | 106 | C | -5.463229  | 5.055440  | -10.203165 | -4.545067 |
| 1CBS | A | THR | 107 | E | -7.950258  | 7.138508  | -12.590497 | -4.748525 |
| 1CBS | A | SER | 108 | E | -10.437538 | 8.445396  | -15.574633 | -5.078673 |
| 1CBS | A | TRP | 109 | E | -14.753535 | 14.708552 | -19.941570 | -6.019047 |
| 1CBS | A | THR | 110 | E | -13.908947 | 16.655689 | -17.491873 | -6.201016 |
| 1CBS | A | ARG | 111 | E | -10.852820 | 13.785768 | -13.995276 | -5.664817 |
| 1CBS | A | GLU | 112 | E | -7.240501  | 9.152017  | -11.032730 | -5.123629 |

|      |   |     |     |   |            |           |            |           |
|------|---|-----|-----|---|------------|-----------|------------|-----------|
| 1CBS | A | LEU | 113 | E | -4.632910  | 5.972280  | -8.874473  | -4.724758 |
| 1CBS | A | THR | 114 | T | -3.505886  | 5.313102  | -8.274062  | -4.888870 |
| 1CBS | A | ASN | 115 | T | -3.503250  | 5.326547  | -8.285509  | -4.889896 |
| 1CBS | A | ASP | 116 | T | -3.503237  | 5.326680  | -8.285604  | -4.889898 |
| 1CBS | A | GLY | 117 | T | -3.504321  | 5.319650  | -8.280510  | -4.889425 |
| 1CBS | A | GLU | 118 | C | -3.599007  | 5.209269  | -8.175737  | -4.914916 |
| 1CBS | A | LEU | 119 | E | -6.712567  | 8.336079  | -10.821200 | -5.093950 |
| 1CBS | A | ILE | 120 | E | -9.729806  | 12.035627 | -12.922307 | -5.106821 |
| 1CBS | A | LEU | 121 | E | -11.315856 | 16.684729 | -14.532219 | -5.808772 |
| 1CBS | A | THR | 122 | E | -11.310551 | 14.907666 | -14.629984 | -5.273758 |
| 1CBS | A | MET | 123 | E | -9.266159  | 10.626521 | -12.526972 | -4.765986 |
| 1CBS | A | THR | 124 | E | -6.583606  | 8.627996  | -9.096666  | -4.026382 |
| 1CBS | A | ALA | 125 | E | -5.385912  | 7.657620  | -8.170096  | -3.876421 |
| 1CBS | A | ASP | 126 | T | -5.365190  | 7.627293  | -8.285172  | -3.894708 |
| 1CBS | A | ASP | 127 | T | -5.334426  | 7.679237  | -8.380484  | -3.920178 |
| 1CBS | A | VAL | 128 | E | -5.335179  | 7.675642  | -8.375294  | -3.919119 |
| 1CBS | A | VAL | 129 | E | -5.411120  | 7.548146  | -8.281557  | -3.905443 |
| 1CBS | A | CYS | 130 | E | -6.807313  | 7.917882  | -10.697959 | -4.401608 |
| 1CBS | A | THR | 131 | E | -7.102127  | 8.654149  | -10.169604 | -4.397564 |
| 1CBS | A | ARG | 132 | E | -12.138979 | 12.631722 | -16.151359 | -5.281170 |
| 1CBS | A | VAL | 133 | E | -11.384813 | 16.523033 | -12.620862 | -4.921105 |
| 1CBS | A | TYR | 134 | E | -9.387726  | 14.006207 | -10.025330 | -4.077563 |
| 1CBS | A | VAL | 135 | E | -9.387726  | 14.006207 | -10.025330 | -4.077563 |
| 1CBS | A | ARG | 136 | E | -9.387726  | 14.006207 | -10.025330 | -4.077563 |
| 1CBS | A | GLU | 137 | C | -9.387726  | 14.006207 | -10.025330 | -4.077563 |
| 1CDY | A | LYS | 1   | C | -7.884606  | 9.358869  | -10.628142 | -4.126544 |
| 1CDY | A | LYS | 2   | E | -7.884606  | 9.358869  | -10.628142 | -4.126544 |
| 1CDY | A | VAL | 3   | E | -7.884606  | 9.358869  | -10.628142 | -4.126544 |
| 1CDY | A | VAL | 4   | E | -7.884606  | 9.358869  | -10.628142 | -4.126544 |
| 1CDY | A | LEU | 5   | E | -8.562825  | 12.915777 | -11.183035 | -5.229599 |
| 1CDY | A | GLY | 6   | E | -7.056685  | 8.293800  | -11.610262 | -5.192609 |
| 1CDY | A | LYS | 7   | E | -5.762918  | 8.940705  | -9.626952  | -5.146646 |
| 1CDY | A | LYS | 8   | T | -5.596097  | 9.023222  | -9.577503  | -5.034512 |
| 1CDY | A | GLY | 9   | T | -5.483445  | 9.035916  | -9.636404  | -5.011796 |
| 1CDY | A | ASP | 10  | b | -5.479517  | 9.057641  | -9.632338  | -5.007172 |
| 1CDY | A | THR | 11  | C | -5.514191  | 9.165584  | -9.497401  | -4.991986 |
| 1CDY | A | VAL | 12  | E | -6.032424  | 9.365022  | -9.669312  | -4.783258 |
| 1CDY | A | GLU | 13  | E | -6.457837  | 9.458574  | -9.928651  | -4.882225 |
| 1CDY | A | LEU | 14  | E | -7.799732  | 12.601186 | -10.056967 | -4.706427 |
| 1CDY | A | THR | 15  | C | -8.298821  | 12.446082 | -10.481756 | -4.697707 |
| 1CDY | A | CYS | 16  | C | -9.713673  | 8.662159  | -15.225176 | -4.841033 |
| 1CDY | A | THR | 17  | B | -8.807008  | 5.828587  | -14.765764 | -4.692088 |
| 1CDY | A | ALA | 18  | C | -7.506683  | 6.136478  | -12.792535 | -4.703878 |
| 1CDY | A | SER | 19  | C | -7.409352  | 6.217758  | -12.923248 | -4.726655 |
| 1CDY | A | GLN | 20  | C | -7.347524  | 6.383785  | -12.940723 | -4.739560 |
| 1CDY | A | LYS | 21  | C | -7.281967  | 6.516593  | -12.932581 | -4.718143 |
| 1CDY | A | LYS | 22  | C | -7.321410  | 6.585608  | -12.820040 | -4.721425 |
| 1CDY | A | SER | 23  | C | -7.946066  | 7.335375  | -13.319047 | -4.748477 |
| 1CDY | A | ILE | 24  | C | -8.229544  | 7.707306  | -13.102642 | -4.684137 |
| 1CDY | A | GLN | 25  | C | -8.611097  | 7.642172  | -12.925073 | -4.542771 |
| 1CDY | A | PHE | 26  | E | -12.460905 | 13.945335 | -15.728899 | -5.148366 |
| 1CDY | A | HIS | 27  | E | -13.403813 | 14.687489 | -16.545156 | -5.391506 |
| 1CDY | A | TRP | 28  | E | -14.878332 | 14.579991 | -20.170740 | -6.322320 |
| 1CDY | A | LYS | 29  | E | -11.693966 | 7.373599  | -18.880635 | -5.967306 |
| 1CDY | A | ASN | 30  | E | -8.286641  | 4.970541  | -14.615096 | -5.084807 |
| 1CDY | A | SER | 31  | T | -8.156727  | 5.207572  | -14.811564 | -5.171924 |
| 1CDY | A | ASN | 32  | T | -8.100881  | 5.643792  | -14.753114 | -5.208966 |
| 1CDY | A | GLN | 33  | T | -8.097768  | 5.689596  | -14.748616 | -5.210352 |
| 1CDY | A | ILE | 34  | E | -8.079308  | 5.945161  | -14.667765 | -5.208742 |
| 1CDY | A | LYS | 35  | E | -8.797049  | 8.269706  | -14.826007 | -5.508311 |
| 1CDY | A | ILE | 36  | E | -9.302662  | 11.187013 | -13.762997 | -5.479889 |
| 1CDY | A | LEU | 37  | E | -9.360537  | 10.226948 | -14.240398 | -5.375067 |
| 1CDY | A | GLY | 38  | E | -7.833343  | 5.227529  | -14.283773 | -5.215531 |
| 1CDY | A | ASN | 39  | E | -6.805949  | 5.194179  | -12.976266 | -5.104608 |
| 1CDY | A | GLN | 40  | E | -6.663162  | 5.701518  | -12.786079 | -5.062412 |
| 1CDY | A | GLY | 41  | T | -6.652419  | 5.739748  | -12.803258 | -5.058932 |
| 1CDY | A | SER | 42  | T | -6.655903  | 5.726105  | -12.790567 | -5.056481 |
| 1CDY | A | PHE | 43  | E | -6.736412  | 5.853865  | -12.573099 | -5.035116 |
| 1CDY | A | LEU | 44  | E | -7.514169  | 7.619692  | -12.279120 | -4.910644 |
| 1CDY | A | THR | 45  | E | -8.829390  | 8.076606  | -14.190177 | -4.972241 |
| 1CDY | A | LYS | 46  | E | -8.204503  | 6.233355  | -13.948113 | -4.925079 |
| 1CDY | A | SER | 47  | T | -7.338185  | 6.410011  | -12.397487 | -4.544671 |
| 1CDY | A | PRO | 48  | T | -6.788134  | 6.596930  | -11.864297 | -4.584169 |
| 1CDY | A | SER | 49  | T | -6.705762  | 6.673927  | -11.971085 | -4.634371 |
| 1CDY | A | LYS | 50  | T | -6.703771  | 6.679095  | -11.979345 | -4.636185 |
| 1CDY | A | LEU | 51  | T | -6.747595  | 6.734577  | -11.840062 | -4.616680 |
| 1CDY | A | ASN | 52  | G | -6.945984  | 6.836328  | -11.800170 | -4.689854 |
| 1CDY | A | ASP | 53  | G | -7.869308  | 7.274465  | -12.864459 | -4.989109 |
| 1CDY | A | ARG | 54  | G | -9.735511  | 8.075768  | -15.208880 | -5.255966 |
| 1CDY | A | ALA | 55  | E | -11.551166 | 11.007435 | -16.735881 | -5.569775 |
| 1CDY | A | ASP | 56  | E | -12.429967 | 9.704562  | -18.802727 | -5.349264 |



|      |   |     |     |   |            |           |            |           |
|------|---|-----|-----|---|------------|-----------|------------|-----------|
| 1CDY | A | SER | 57  | C | -12.012853 | 9.958633  | -17.158725 | -4.815990 |
| 1CDY | A | ARG | 58  | C | -12.033787 | 10.051360 | -16.978725 | -4.734638 |
| 1CDY | A | ARG | 59  | H | -11.592254 | 11.351178 | -16.006586 | -4.821967 |
| 1CDY | A | SER | 60  | H | -11.031822 | 11.654605 | -15.501559 | -5.159245 |
| 1CDY | A | LEU | 61  | H | -10.851505 | 11.974172 | -15.485405 | -5.326393 |
| 1CDY | A | TRP | 62  | H | -10.824604 | 12.168431 | -15.588171 | -5.488736 |
| 1CDY | A | ASP | 63  | H | -10.631666 | 12.046627 | -15.605179 | -5.522241 |
| 1CDY | A | GLN | 64  | C | -10.616988 | 12.239771 | -15.530559 | -5.548473 |
| 1CDY | A | GLY | 65  | C | -10.819033 | 12.546758 | -15.617436 | -5.609513 |
| 1CDY | A | ASN | 66  | B | -10.998661 | 12.630087 | -15.566783 | -5.558090 |
| 1CDY | A | PHE | 67  | C | -11.088981 | 13.196081 | -15.041864 | -5.391538 |
| 1CDY | A | PRO | 68  | C | -11.295191 | 16.788953 | -12.768205 | -4.793597 |
| 1CDY | A | LEU | 69  | E | -11.180404 | 17.312467 | -12.275968 | -4.778385 |
| 1CDY | A | ILE | 70  | E | -11.061949 | 16.917219 | -12.534624 | -4.841302 |
| 1CDY | A | ILE | 71  | E | -10.987128 | 16.444359 | -12.944856 | -4.939495 |
| 1CDY | A | LYS | 72  | T | -10.911917 | 15.754491 | -13.486725 | -5.080769 |
| 1CDY | A | ASN | 73  | T | -9.901909  | 11.395916 | -13.801322 | -5.128949 |
| 1CDY | A | LEU | 74  | b | -9.816382  | 11.002437 | -14.061294 | -5.132621 |
| 1CDY | A | LYS | 75  | C | -9.538298  | 10.176278 | -14.485146 | -5.228361 |
| 1CDY | A | ILE | 76  | G | -9.490708  | 10.028560 | -14.636854 | -5.240777 |
| 1CDY | A | GLU | 77  | G | -9.436246  | 9.749389  | -14.901376 | -5.298106 |
| 1CDY | A | ASP | 78  | G | -9.730655  | 9.060958  | -15.655665 | -5.423221 |
| 1CDY | A | SER | 79  | C | -9.832723  | 8.794692  | -15.784613 | -5.480138 |
| 1CDY | A | ASP | 80  | E | -10.443810 | 8.271485  | -16.969076 | -5.670799 |
| 1CDY | A | THR | 81  | E | -10.783480 | 7.810042  | -17.439180 | -5.872061 |
| 1CDY | A | TYR | 82  | E | -13.017982 | 14.579762 | -17.731174 | -5.894204 |
| 1CDY | A | ILE | 83  | E | -12.379073 | 14.257846 | -16.398063 | -5.705994 |
| 1CDY | A | CYS | 84  | E | -10.613403 | 9.669613  | -16.019064 | -5.662895 |
| 1CDY | A | GLU | 85  | E | -10.461015 | 9.621713  | -16.304951 | -5.733536 |
| 1CDY | A | VAL | 86  | E | -9.823605  | 9.112429  | -16.100869 | -5.890365 |
| 1CDY | A | GLU | 87  | T | -9.808273  | 9.085872  | -16.197459 | -5.912969 |
| 1CDY | A | ASP | 88  | T | -9.801948  | 9.028363  | -16.270176 | -5.931853 |
| 1CDY | A | GLN | 89  | E | -9.966104  | 8.894083  | -16.359216 | -6.019365 |
| 1CDY | A | LYS | 90  | E | -10.025927 | 8.844227  | -16.264589 | -6.026069 |
| 1CDY | A | GLU | 91  | E | -11.582909 | 8.720592  | -19.721998 | -6.727331 |
| 1CDY | A | GLU | 92  | E | -11.896827 | 10.656444 | -18.723021 | -6.456220 |
| 1CDY | A | VAL | 93  | E | -12.150665 | 16.142912 | -14.615685 | -5.112107 |
| 1CDY | A | GLN | 94  | E | -12.148020 | 16.538246 | -14.304893 | -5.030598 |
| 1CDY | A | LEU | 95  | E | -11.761750 | 18.094566 | -12.709720 | -4.855229 |
| 1CDY | A | LEU | 96  | E | -11.349000 | 19.035051 | -11.789211 | -4.867268 |
| 1CDY | A | VAL | 97  | E | -10.075105 | 16.945016 | -10.242075 | -4.540747 |
| 1CDY | A | PHE | 98  | E | -9.310760  | 17.080092 | -9.495905  | -4.646003 |
| 1CDY | A | GLY | 99  | E | -7.680062  | 10.364060 | -10.619780 | -4.643421 |
| 1CDY | A | LEU | 100 | E | -7.589592  | 10.356896 | -10.795782 | -4.651195 |
| 1CDY | A | THR | 101 | E | -7.400069  | 9.340135  | -11.445747 | -4.687725 |
| 1CDY | A | ALA | 102 | E | -7.176648  | 8.467709  | -11.863499 | -4.724805 |
| 1CDY | A | ASN | 103 | T | -6.987985  | 7.770717  | -12.161997 | -4.759246 |
| 1CDY | A | SER | 104 | T | -7.182033  | 6.927400  | -12.778379 | -4.804226 |
| 1CDY | A | ASP | 105 | T | -7.221179  | 6.694183  | -12.855140 | -4.810834 |
| 1CDY | A | THR | 106 | T | -7.355461  | 6.700031  | -12.776703 | -4.817426 |
| 1CDY | A | HIS | 107 | E | -7.686708  | 6.679748  | -12.835151 | -4.831889 |
| 1CDY | A | LEU | 108 | E | -8.557928  | 9.492901  | -12.702741 | -4.661965 |
| 1CDY | A | LEU | 109 | T | -7.828924  | 7.874558  | -12.582979 | -4.761393 |
| 1CDY | A | GLN | 110 | T | -7.820511  | 7.923742  | -12.595816 | -4.778586 |
| 1CDY | A | GLY | 111 | T | -7.809194  | 7.990559  | -12.626153 | -4.794001 |
| 1CDY | A | GLN | 112 | b | -7.815521  | 7.971349  | -12.608458 | -4.793658 |
| 1CDY | A | SER | 113 | C | -7.949492  | 7.597634  | -12.694897 | -4.829782 |
| 1CDY | A | LEU | 114 | E | -9.502786  | 11.173471 | -13.841925 | -5.308905 |
| 1CDY | A | THR | 115 | E | -10.064562 | 11.882224 | -14.277398 | -5.551864 |
| 1CDY | A | LEU | 116 | E | -11.232455 | 14.461859 | -14.679420 | -5.364571 |
| 1CDY | A | THR | 117 | E | -11.338098 | 13.808873 | -14.948741 | -5.158211 |
| 1CDY | A | LEU | 118 | E | -9.649086  | 12.019549 | -12.214106 | -4.647191 |
| 1CDY | A | GLU | 119 | E | -6.775196  | 8.030542  | -10.606352 | -4.721958 |
| 1CDY | A | SER | 120 | C | -5.429283  | 7.245281  | -9.348986  | -4.598445 |
| 1CDY | A | PRO | 121 | T | -3.913145  | 5.872635  | -7.363079  | -4.029984 |
| 1CDY | A | PRO | 122 | T | -3.779771  | 5.850133  | -7.561005  | -4.043962 |
| 1CDY | A | GLY | 123 | T | -3.777788  | 5.851978  | -7.573684  | -4.044867 |
| 1CDY | A | SER | 124 | T | -3.781527  | 5.838323  | -7.554475  | -4.040465 |
| 1CDY | A | SER | 125 | C | -3.815513  | 5.759529  | -7.455701  | -4.007608 |
| 1CDY | A | PRO | 126 | C | -4.720266  | 5.757965  | -8.376185  | -4.092067 |
| 1CDY | A | SER | 127 | E | -7.142235  | 6.504734  | -11.362388 | -4.302260 |
| 1CDY | A | VAL | 128 | E | -9.749250  | 9.931289  | -12.947722 | -3.989856 |
| 1CDY | A | GLN | 129 | C | -10.705394 | 10.313768 | -14.233525 | -4.168475 |
| 1CDY | A | CYS | 130 | C | -11.427057 | 11.147210 | -14.920739 | -4.593066 |
| 1CDY | A | ARG | 131 | B | -12.711465 | 8.534857  | -19.466875 | -5.293657 |
| 1CDY | A | SER | 132 | T | -9.351895  | 5.930346  | -15.104507 | -4.788997 |
| 1CDY | A | PRO | 133 | T | -8.245005  | 5.374188  | -14.511498 | -4.967997 |
| 1CDY | A | ARG | 134 | T | -8.170176  | 5.482816  | -14.636030 | -4.998424 |
| 1CDY | A | GLY | 135 | T | -7.178284  | 6.055304  | -12.936422 | -4.977966 |
| 1CDY | A | LYS | 136 | C | -7.024351  | 5.960518  | -13.046609 | -4.943674 |
| 1CDY | A | ASN | 137 | B | -6.671628  | 6.080909  | -12.570550 | -4.868820 |

|      |   |     |     |   |            |           |            |           |
|------|---|-----|-----|---|------------|-----------|------------|-----------|
| 1CDY | A | ILE | 138 | C | -6.652288  | 6.129285  | -12.505695 | -4.830977 |
| 1CDY | A | GLN | 139 | C | -5.862526  | 5.259092  | -11.607804 | -4.779546 |
| 1CDY | A | GLY | 140 | B | -5.848000  | 5.401434  | -11.508236 | -4.754436 |
| 1CDY | A | GLY | 141 | T | -5.862261  | 5.425842  | -11.453697 | -4.752263 |
| 1CDY | A | LYS | 142 | T | -5.935964  | 5.321738  | -11.373939 | -4.748843 |
| 1CDY | A | THR | 143 | E | -5.950903  | 5.311782  | -11.330112 | -4.754151 |
| 1CDY | A | LEU | 144 | E | -7.102825  | 7.490884  | -11.520591 | -4.702210 |
| 1CDY | A | SER | 145 | E | -8.538556  | 9.866408  | -12.529915 | -4.676034 |
| 1CDY | A | VAL | 146 | E | -9.149144  | 10.560122 | -13.033812 | -4.438948 |
| 1CDY | A | SER | 147 | T | -9.081564  | 10.387422 | -13.127609 | -4.460873 |
| 1CDY | A | GLN | 148 | T | -9.319571  | 9.798919  | -13.834387 | -4.525972 |
| 1CDY | A | LEU | 149 | b | -9.430524  | 9.727167  | -13.941867 | -4.566897 |
| 1CDY | A | GLU | 150 | C | -9.589675  | 9.624858  | -14.206062 | -4.662686 |
| 1CDY | A | LEU | 151 | G | -9.730495  | 8.882408  | -15.084838 | -4.870023 |
| 1CDY | A | GLN | 152 | G | -10.023282 | 8.077743  | -16.416430 | -5.212724 |
| 1CDY | A | ASP | 153 | G | -10.158603 | 7.719547  | -16.696986 | -5.281088 |
| 1CDY | A | SER | 154 | C | -10.057811 | 8.565609  | -16.200193 | -5.269242 |
| 1CDY | A | GLY | 155 | E | -9.742858  | 10.722256 | -14.879546 | -5.458991 |
| 1CDY | A | THR | 156 | E | -9.927479  | 12.245554 | -14.297778 | -5.583348 |
| 1CDY | A | TRP | 157 | E | -10.004087 | 12.982295 | -13.845576 | -5.587010 |
| 1CDY | A | THR | 158 | E | -9.958127  | 12.897571 | -13.932739 | -5.563140 |
| 1CDY | A | CYS | 159 | E | -10.075114 | 13.024168 | -13.852604 | -5.633009 |
| 1CDY | A | THR | 160 | E | -10.951104 | 13.134023 | -15.303006 | -5.510795 |
| 1CDY | A | VAL | 161 | E | -9.029081  | 10.321461 | -12.862755 | -5.058480 |
| 1CDY | A | LEU | 162 | E | -8.288875  | 9.291402  | -13.276696 | -5.422511 |
| 1CDY | A | GLN | 163 | E | -7.474104  | 9.265111  | -12.537451 | -5.623774 |
| 1CDY | A | ASN | 164 | T | -6.582122  | 9.512920  | -10.582557 | -5.121753 |
| 1CDY | A | GLN | 165 | T | -6.483998  | 9.775138  | -10.579034 | -5.134092 |
| 1CDY | A | LYS | 166 | E | -6.491507  | 9.772845  | -10.550951 | -5.135605 |
| 1CDY | A | LYS | 167 | E | -6.496795  | 9.964761  | -10.435893 | -5.133762 |
| 1CDY | A | VAL | 168 | E | -6.587683  | 10.094147 | -10.126697 | -5.040488 |
| 1CDY | A | GLU | 169 | E | -7.481291  | 12.043297 | -10.533905 | -5.273663 |
| 1CDY | A | PHE | 170 | E | -8.476578  | 15.807154 | -10.432766 | -5.570501 |
| 1CDY | A | LYS | 171 | E | -8.485251  | 15.806403 | -10.402024 | -5.571264 |
| 1CDY | A | ILE | 172 | E | -9.247264  | 15.203571 | -11.633667 | -5.352638 |
| 1CDY | A | ASP | 173 | E | -8.768483  | 14.204709 | -10.882501 | -4.931651 |
| 1CDY | A | ILE | 174 | E | -7.111312  | 12.412122 | -7.501468  | -3.674392 |
| 1CDY | A | VAL | 175 | E | -5.098687  | 8.523099  | -5.889639  | -2.876250 |
| 1CDY | A | VAL | 176 | E | -5.098687  | 8.523099  | -5.889639  | -2.876250 |
| 1CDY | A | LEU | 177 | C | -5.098687  | 8.523099  | -5.889639  | -2.876250 |
| 1CDY | A | ALA | 178 | C | -5.098687  | 8.523099  | -5.889639  | -2.876250 |
| 1CLL | A | LEU | 4   | C | -2.878702  | 4.676041  | -6.017969  | -3.420758 |
| 1CLL | A | THR | 5   | H | -2.878702  | 4.676041  | -6.017969  | -3.420758 |
| 1CLL | A | GLU | 6   | H | -2.878702  | 4.676041  | -6.017969  | -3.420758 |
| 1CLL | A | GLU | 7   | H | -2.878702  | 4.676041  | -6.017969  | -3.420758 |
| 1CLL | A | GLN | 8   | H | -4.014652  | 5.807220  | -8.236287  | -4.350606 |
| 1CLL | A | ILE | 9   | H | -4.855012  | 6.667741  | -9.781458  | -5.023528 |
| 1CLL | A | ALA | 10  | H | -5.583595  | 7.565019  | -11.305899 | -5.853877 |
| 1CLL | A | GLU | 11  | H | -6.098819  | 8.356684  | -11.942629 | -6.427459 |
| 1CLL | A | PHE | 12  | H | -7.624002  | 12.936596 | -13.752923 | -7.650716 |
| 1CLL | A | LYS | 13  | H | -8.167589  | 13.508384 | -14.858688 | -8.038912 |
| 1CLL | A | GLU | 14  | H | -8.418063  | 13.184976 | -15.037092 | -7.871570 |
| 1CLL | A | ALA | 15  | H | -8.943464  | 13.297681 | -14.785821 | -7.356209 |
| 1CLL | A | PHE | 16  | H | -10.022938 | 10.841047 | -13.210616 | -4.140176 |
| 1CLL | A | SER | 17  | H | -10.036138 | 10.542229 | -13.175497 | -4.024545 |
| 1CLL | A | LEU | 18  | H | -10.292706 | 10.490317 | -13.197633 | -3.985446 |
| 1CLL | A | PHE | 19  | H | -10.081259 | 10.762113 | -14.571501 | -5.447481 |
| 1CLL | A | ASP | 20  | T | -8.119267  | 4.098493  | -15.312358 | -5.403933 |
| 1CLL | A | LYS | 21  | T | -5.676193  | 2.731416  | -12.726768 | -5.327990 |
| 1CLL | A | ASP | 22  | T | -4.698920  | 3.094098  | -11.281003 | -5.078796 |
| 1CLL | A | GLY | 23  | T | -4.614528  | 3.616178  | -11.106305 | -5.045831 |
| 1CLL | A | ASP | 24  | C | -4.607249  | 3.695614  | -11.098398 | -5.046502 |
| 1CLL | A | GLY | 25  | C | -4.608436  | 3.700395  | -11.087877 | -5.045806 |
| 1CLL | A | THR | 26  | E | -4.713367  | 3.892814  | -10.777195 | -4.990693 |
| 1CLL | A | ILE | 27  | E | -5.755348  | 7.315779  | -10.012370 | -4.853020 |
| 1CLL | A | THR | 28  | C | -7.180569  | 10.258055 | -10.575380 | -5.117475 |
| 1CLL | A | THR | 29  | H | -8.903529  | 12.626935 | -12.281564 | -5.433358 |
| 1CLL | A | LYS | 30  | H | -9.847446  | 11.927245 | -14.220740 | -5.414447 |
| 1CLL | A | GLU | 31  | H | -10.160846 | 11.939511 | -14.847156 | -5.506582 |
| 1CLL | A | LEU | 32  | H | -9.996848  | 12.855170 | -13.786899 | -5.319757 |
| 1CLL | A | GLY | 33  | H | -9.963182  | 12.834780 | -14.521630 | -5.839521 |
| 1CLL | A | THR | 34  | H | -9.890881  | 12.894385 | -14.921695 | -6.130433 |
| 1CLL | A | VAL | 35  | H | -9.862950  | 12.798307 | -14.964521 | -6.088155 |
| 1CLL | A | MET | 36  | H | -9.388640  | 9.306524  | -14.966459 | -5.348852 |
| 1CLL | A | ARG | 37  | H | -8.362333  | 5.342887  | -14.251579 | -4.619600 |
| 1CLL | A | SER | 38  | H | -5.790051  | 4.216522  | -11.167581 | -4.593700 |
| 1CLL | A | LEU | 39  | C | -5.322268  | 6.041116  | -10.230031 | -4.700678 |
| 1CLL | A | GLY | 40  | C | -5.199925  | 6.208143  | -10.297686 | -4.742310 |
| 1CLL | A | GLN | 41  | C | -5.197106  | 6.219686  | -10.308163 | -4.744184 |
| 1CLL | A | ASN | 42  | C | -5.159536  | 6.291687  | -10.322425 | -4.734501 |
| 1CLL | A | PRO | 43  | C | -5.367025  | 7.350768  | -9.963414  | -4.775490 |

|      |   |     |     |   |            |           |            |           |
|------|---|-----|-----|---|------------|-----------|------------|-----------|
| 1CLL | A | THR | 44  | C | -5.874186  | 7.062075  | -10.739543 | -4.745343 |
| 1CLL | A | GLU | 45  | H | -6.391137  | 7.238425  | -10.946879 | -4.498082 |
| 1CLL | A | ALA | 46  | H | -6.414816  | 7.187890  | -10.874948 | -4.473451 |
| 1CLL | A | GLU | 47  | H | -6.879084  | 7.124271  | -11.030078 | -4.347072 |
| 1CLL | A | LEU | 48  | H | -7.905275  | 7.379376  | -12.039180 | -4.467487 |
| 1CLL | A | GLN | 49  | H | -10.740546 | 9.341791  | -16.776832 | -5.335331 |
| 1CLL | A | ASP | 50  | H | -9.171665  | 9.821146  | -13.130074 | -4.941056 |
| 1CLL | A | MET | 51  | H | -9.010567  | 10.269170 | -12.949947 | -4.899742 |
| 1CLL | A | ILE | 52  | H | -8.892577  | 10.213303 | -13.083703 | -4.883442 |
| 1CLL | A | ASN | 53  | H | -8.196167  | 7.945579  | -13.272835 | -4.796431 |
| 1CLL | A | GLU | 54  | H | -8.068798  | 7.745704  | -13.433968 | -4.787456 |
| 1CLL | A | VAL | 55  | H | -7.622188  | 6.493228  | -13.236312 | -4.708431 |
| 1CLL | A | ASP | 56  | T | -6.503546  | 3.058140  | -13.467504 | -4.922591 |
| 1CLL | A | ALA | 57  | T | -4.481154  | 1.662840  | -11.283490 | -4.916402 |
| 1CLL | A | ASP | 58  | T | -4.339538  | 1.967318  | -11.398298 | -4.984264 |
| 1CLL | A | GLY | 59  | T | -4.302721  | 2.235696  | -11.350526 | -4.982104 |
| 1CLL | A | ASN | 60  | C | -4.303622  | 2.232023  | -11.347969 | -4.982905 |
| 1CLL | A | GLY | 61  | C | -4.316086  | 2.226714  | -11.301771 | -4.983248 |
| 1CLL | A | THR | 62  | C | -5.096719  | 3.893680  | -11.544114 | -5.161874 |
| 1CLL | A | ILE | 63  | E | -5.957359  | 6.453697  | -10.640420 | -4.943156 |
| 1CLL | A | ASP | 64  | E | -8.570454  | 9.020896  | -13.085766 | -5.134854 |
| 1CLL | A | PHE | 65  | H | -10.130863 | 13.946703 | -12.677700 | -4.807589 |
| 1CLL | A | PRO | 66  | H | -10.248148 | 13.825637 | -12.593296 | -4.715546 |
| 1CLL | A | GLU | 67  | H | -10.952451 | 14.160331 | -13.324661 | -4.804868 |
| 1CLL | A | PHE | 68  | H | -11.705449 | 15.958975 | -14.070515 | -5.017885 |
| 1CLL | A | LEU | 69  | H | -11.188399 | 13.819669 | -14.208903 | -4.927056 |
| 1CLL | A | THR | 70  | H | -10.154816 | 10.571705 | -13.718396 | -4.508098 |
| 1CLL | A | MET | 71  | H | -10.117882 | 10.433553 | -13.887853 | -4.532894 |
| 1CLL | A | MET | 72  | H | -9.899070  | 10.397074 | -14.023177 | -4.607763 |
| 1CLL | A | ALA | 73  | H | -9.357005  | 8.739944  | -14.007876 | -4.477979 |
| 1CLL | A | ARG | 74  | H | -8.866200  | 7.670423  | -14.093845 | -4.596253 |
| 1CLL | A | LYS | 75  | H | -8.202701  | 7.437079  | -13.527137 | -4.876695 |
| 1CLL | A | MET | 76  | H | -7.470065  | 6.620879  | -12.998527 | -4.881012 |
| 1CLL | A | LYS | 77  | H | -7.394188  | 6.459923  | -13.129654 | -4.846717 |
| 1CLL | A | ASP | 78  | H | -7.405651  | 6.429921  | -13.122943 | -4.857587 |
| 1CLL | A | THR | 79  | H | -7.428884  | 6.403281  | -13.101896 | -4.868034 |
| 1CLL | A | ASP | 80  | H | -7.548302  | 6.161785  | -13.097750 | -4.843680 |
| 1CLL | A | SER | 81  | H | -8.516301  | 5.701609  | -14.472190 | -4.691215 |
| 1CLL | A | GLU | 82  | H | -9.539734  | 6.970432  | -16.272343 | -5.118748 |
| 1CLL | A | GLU | 83  | H | -9.475628  | 7.691208  | -15.795271 | -5.082313 |
| 1CLL | A | GLU | 84  | H | -9.540887  | 8.947977  | -15.092040 | -4.967173 |
| 1CLL | A | ILE | 85  | H | -9.743528  | 10.018363 | -14.497146 | -4.869187 |
| 1CLL | A | ARG | 86  | H | -9.874137  | 10.549682 | -14.054742 | -4.724163 |
| 1CLL | A | GLU | 87  | H | -9.452109  | 10.450061 | -12.815758 | -4.153039 |
| 1CLL | A | ALA | 88  | H | -9.561883  | 10.676356 | -12.410912 | -3.965046 |
| 1CLL | A | PHE | 89  | H | -9.753910  | 10.696452 | -11.977185 | -3.720060 |
| 1CLL | A | ARG | 90  | H | -9.665077  | 10.907096 | -12.098390 | -3.798929 |
| 1CLL | A | VAL | 91  | H | -9.640273  | 10.933616 | -12.215940 | -3.877168 |
| 1CLL | A | PHE | 92  | H | -9.412064  | 10.863566 | -13.483038 | -5.172152 |
| 1CLL | A | ASP | 93  | T | -7.472598  | 4.255733  | -14.319921 | -5.314155 |
| 1CLL | A | LYS | 94  | T | -5.062771  | 3.028969  | -11.658594 | -5.216981 |
| 1CLL | A | ASP | 95  | T | -5.027410  | 3.155770  | -11.731210 | -5.233572 |
| 1CLL | A | GLY | 96  | T | -5.019614  | 3.236094  | -11.729474 | -5.234233 |
| 1CLL | A | ASN | 97  | C | -5.019846  | 3.233284  | -11.728884 | -5.234197 |
| 1CLL | A | GLY | 98  | C | -5.028998  | 3.221366  | -11.687998 | -5.232844 |
| 1CLL | A | TYR | 99  | C | -6.591457  | 5.993131  | -12.667559 | -5.458953 |
| 1CLL | A | ILE | 100 | B | -7.581012  | 9.323021  | -11.637438 | -5.278988 |
| 1CLL | A | SER | 101 | C | -10.145451 | 10.670866 | -14.796394 | -5.083805 |
| 1CLL | A | ALA | 102 | H | -10.684492 | 10.769969 | -15.072937 | -4.666526 |
| 1CLL | A | ALA | 103 | H | -10.783907 | 10.468545 | -15.205012 | -4.639894 |
| 1CLL | A | GLU | 104 | H | -10.832328 | 10.325177 | -15.212949 | -4.643489 |
| 1CLL | A | LEU | 105 | H | -11.165616 | 12.539886 | -15.875935 | -5.598071 |
| 1CLL | A | ARG | 106 | H | -9.945806  | 13.705779 | -16.872621 | -8.625816 |
| 1CLL | A | HIS | 107 | H | -8.028387  | 12.772708 | -14.525243 | -8.166522 |
| 1CLL | A | VAL | 108 | H | -7.758472  | 11.891560 | -13.713304 | -7.095846 |
| 1CLL | A | MET | 109 | H | -6.803008  | 8.334729  | -11.923614 | -5.465195 |
| 1CLL | A | THR | 110 | H | -4.788990  | 6.043095  | -9.273832  | -4.838162 |
| 1CLL | A | ASN | 111 | H | -3.961396  | 5.014208  | -8.832643  | -4.645136 |
| 1CLL | A | LEU | 112 | H | -3.627813  | 6.055823  | -8.143912  | -4.613469 |
| 1CLL | A | GLY | 113 | C | -3.557974  | 6.111079  | -8.235949  | -4.635238 |
| 1CLL | A | GLU | 114 | C | -3.558462  | 6.111125  | -8.233013  | -4.634736 |
| 1CLL | A | LYS | 115 | C | -3.633588  | 6.130946  | -8.107229  | -4.607756 |
| 1CLL | A | LEU | 116 | C | -3.969581  | 7.233844  | -7.659939  | -4.621818 |
| 1CLL | A | THR | 117 | C | -4.823031  | 6.594375  | -9.113615  | -4.798049 |
| 1CLL | A | ASP | 118 | H | -6.471829  | 7.499224  | -11.744854 | -4.928756 |
| 1CLL | A | GLU | 119 | H | -6.720464  | 7.287766  | -11.948577 | -4.890220 |
| 1CLL | A | GLU | 120 | H | -7.169470  | 7.436745  | -12.270614 | -4.870046 |
| 1CLL | A | VAL | 121 | H | -7.388839  | 7.502749  | -11.979227 | -4.770073 |
| 1CLL | A | ASP | 122 | H | -8.855449  | 9.003462  | -14.886154 | -5.816767 |
| 1CLL | A | GLU | 123 | H | -9.482857  | 9.129326  | -14.536516 | -4.935840 |
| 1CLL | A | MET | 124 | H | -9.692418  | 10.000725 | -13.498132 | -4.375089 |

|      |   |     |     |   |            |           |            |           |
|------|---|-----|-----|---|------------|-----------|------------|-----------|
| 1CLL | A | ILE | 125 | H | -9.573704  | 10.038366 | -13.318369 | -4.243192 |
| 1CLL | A | ARG | 126 | H | -8.872695  | 9.123885  | -12.678497 | -4.188296 |
| 1CLL | A | GLU | 127 | H | -8.739351  | 8.856945  | -13.002781 | -4.295977 |
| 1CLL | A | ALA | 128 | H | -7.269370  | 6.343631  | -12.217088 | -4.650611 |
| 1CLL | A | ASP | 129 | T | -6.823979  | 4.698176  | -13.121029 | -4.829228 |
| 1CLL | A | ILE | 130 | T | -5.131564  | 2.805492  | -11.674819 | -4.979222 |
| 1CLL | A | ASP | 131 | T | -5.110619  | 2.842389  | -11.765716 | -5.004988 |
| 1CLL | A | GLY | 132 | T | -5.105529  | 2.879433  | -11.776403 | -5.007394 |
| 1CLL | A | ASP | 133 | C | -5.119953  | 2.798810  | -11.766945 | -5.015491 |
| 1CLL | A | GLY | 134 | C | -5.137938  | 2.784563  | -11.700358 | -5.016359 |
| 1CLL | A | GLN | 135 | C | -6.947453  | 4.674266  | -13.994457 | -5.584111 |
| 1CLL | A | VAL | 136 | B | -7.894750  | 7.214480  | -13.088524 | -5.257525 |
| 1CLL | A | ASN | 137 | C | -11.369691 | 9.869616  | -17.115805 | -5.714343 |
| 1CLL | A | TYR | 138 | H | -12.559448 | 15.280027 | -17.127699 | -6.146547 |
| 1CLL | A | GLU | 139 | H | -11.209912 | 18.783223 | -15.564819 | -8.188517 |
| 1CLL | A | GLU | 140 | H | -10.679874 | 18.723605 | -14.719833 | -7.902855 |
| 1CLL | A | PHE | 141 | H | -7.760057  | 15.834976 | -9.667045  | -6.249743 |
| 1CLL | A | VAL | 142 | H | -5.638081  | 10.863355 | -8.364590  | -5.276486 |
| 1CLL | A | GLN | 143 | H | -4.842505  | 9.574858  | -7.837688  | -4.837871 |
| 1CLL | A | MET | 144 | H | -3.310712  | 7.733027  | -4.942055  | -3.544662 |
| 1CLL | A | MET | 145 | H | -3.310712  | 7.733027  | -4.942055  | -3.544662 |
| 1CLL | A | THR | 146 | H | -3.310712  | 7.733027  | -4.942055  | -3.544662 |
| 1CLL | A | ALA | 147 | C | -3.310712  | 7.733027  | -4.942055  | -3.544662 |
| 1CTQ | A | MET | 1   | C | -8.723944  | 11.670208 | -11.609516 | -5.019133 |
| 1CTQ | A | THR | 2   | C | -8.723944  | 11.670208 | -11.609516 | -5.019133 |
| 1CTQ | A | GLU | 3   | E | -8.723944  | 11.670208 | -11.609516 | -5.019133 |
| 1CTQ | A | TYR | 4   | E | -8.723944  | 11.670208 | -11.609516 | -5.019133 |
| 1CTQ | A | LYS | 5   | E | -10.842209 | 14.631651 | -13.936805 | -5.692956 |
| 1CTQ | A | LEU | 6   | E | -10.016992 | 16.412137 | -9.330808  | -3.875495 |
| 1CTQ | A | VAL | 7   | E | -9.772801  | 15.542110 | -9.842184  | -3.830394 |
| 1CTQ | A | VAL | 8   | E | -8.585284  | 11.538955 | -10.518517 | -4.074373 |
| 1CTQ | A | VAL | 9   | E | -7.047449  | 7.258359  | -11.112210 | -4.428914 |
| 1CTQ | A | GLY | 10  | E | -6.206878  | 5.856025  | -11.132239 | -4.489899 |
| 1CTQ | A | ALA | 11  | T | -5.479303  | 5.711843  | -10.339357 | -4.474226 |
| 1CTQ | A | GLY | 12  | T | -5.468524  | 5.734734  | -10.384484 | -4.485284 |
| 1CTQ | A | GLY | 13  | T | -5.471135  | 5.711610  | -10.383964 | -4.487030 |
| 1CTQ | A | VAL | 14  | T | -5.510753  | 5.628549  | -10.330285 | -4.489024 |
| 1CTQ | A | GLY | 15  | C | -5.668789  | 5.695520  | -10.082927 | -4.482664 |
| 1CTQ | A | LYS | 16  | H | -7.835396  | 7.090074  | -12.839770 | -5.069396 |
| 1CTQ | A | SER | 17  | H | -10.631197 | 10.098980 | -15.621141 | -5.007412 |
| 1CTQ | A | ALA | 18  | H | -11.156636 | 12.506064 | -14.773058 | -4.770146 |
| 1CTQ | A | LEU | 19  | H | -11.446063 | 13.654111 | -14.331237 | -4.793611 |
| 1CTQ | A | THR | 20  | H | -11.875321 | 15.772435 | -13.511385 | -4.635640 |
| 1CTQ | A | ILE | 21  | H | -11.879963 | 15.795843 | -13.513517 | -4.653166 |
| 1CTQ | A | GLN | 22  | H | -11.636471 | 14.522600 | -15.364642 | -5.931606 |
| 1CTQ | A | LEU | 23  | H | -8.801751  | 12.493077 | -11.271877 | -5.095083 |
| 1CTQ | A | ILE | 24  | H | -8.685116  | 12.765534 | -11.633907 | -5.279191 |
| 1CTQ | A | GLN | 25  | H | -8.451767  | 13.027439 | -12.904048 | -6.260135 |
| 1CTQ | A | ASN | 26  | C | -7.990354  | 12.242359 | -13.017190 | -6.255288 |
| 1CTQ | A | HIS | 27  | C | -7.109847  | 10.283200 | -10.782725 | -4.947164 |
| 1CTQ | A | PHE | 28  | C | -5.220798  | 10.154159 | -6.921666  | -4.244796 |
| 1CTQ | A | VAL | 29  | C | -3.369465  | 6.670305  | -6.049942  | -4.002000 |
| 1CTQ | A | ASP | 30  | C | -2.285495  | 4.323665  | -6.176027  | -4.003669 |
| 1CTQ | A | GLU | 31  | C | -2.244830  | 4.416452  | -6.277800  | -4.030746 |
| 1CTQ | A | TYR | 32  | C | -2.230731  | 4.464379  | -6.312655  | -4.033995 |
| 1CTQ | A | ASP | 33  | C | -2.233738  | 4.432445  | -6.312435  | -4.032739 |
| 1CTQ | A | PRO | 34  | C | -2.327311  | 4.050862  | -6.323170  | -4.013676 |
| 1CTQ | A | THR | 35  | T | -3.681763  | 5.803452  | -7.512541  | -4.193078 |
| 1CTQ | A | ILE | 36  | T | -4.436683  | 6.447491  | -7.633226  | -4.042478 |
| 1CTQ | A | GLU | 37  | T | -6.098037  | 8.881710  | -9.600016  | -4.764251 |
| 1CTQ | A | ASP | 38  | E | -7.581812  | 10.267250 | -13.364357 | -6.174434 |
| 1CTQ | A | SER | 39  | E | -8.005209  | 10.509809 | -13.571243 | -6.317269 |
| 1CTQ | A | TYR | 40  | E | -9.496214  | 12.240532 | -13.077541 | -5.118228 |
| 1CTQ | A | ARG | 41  | E | -7.721215  | 10.570799 | -9.986993  | -4.353341 |
| 1CTQ | A | LYS | 42  | E | -7.562829  | 10.650939 | -10.099579 | -4.351005 |
| 1CTQ | A | GLN | 43  | E | -7.488292  | 10.442461 | -10.356569 | -4.372769 |
| 1CTQ | A | VAL | 44  | E | -6.368916  | 7.093753  | -10.328530 | -4.282565 |
| 1CTQ | A | VAL | 45  | E | -5.988907  | 6.542672  | -10.928602 | -4.629954 |
| 1CTQ | A | ILE | 46  | E | -5.897422  | 6.417903  | -11.145034 | -4.743381 |
| 1CTQ | A | ASP | 47  | T | -5.857462  | 6.200489  | -11.378087 | -4.800154 |
| 1CTQ | A | GLY | 48  | T | -5.859608  | 6.185487  | -11.383211 | -4.804089 |
| 1CTQ | A | GLU | 49  | E | -6.123463  | 6.009724  | -11.977103 | -5.105435 |
| 1CTQ | A | THR | 50  | E | -6.657752  | 6.126486  | -12.535147 | -5.235943 |
| 1CTQ | A | CYS | 51  | E | -7.331181  | 4.629330  | -14.016176 | -5.392566 |
| 1CTQ | A | LEU | 52  | E | -9.108031  | 7.874065  | -14.386912 | -5.279268 |
| 1CTQ | A | LEU | 53  | E | -11.431625 | 14.912767 | -14.528655 | -5.106191 |
| 1CTQ | A | ASP | 54  | E | -11.420649 | 15.408875 | -14.306735 | -5.152183 |
| 1CTQ | A | ILE | 55  | E | -11.319805 | 15.769725 | -13.805164 | -5.036231 |
| 1CTQ | A | LEU | 56  | E | -11.142822 | 14.594237 | -14.259010 | -5.090554 |
| 1CTQ | A | ASP | 57  | E | -11.214423 | 13.579341 | -15.003922 | -5.213192 |
| 1CTQ | A | THR | 58  | C | -10.147243 | 9.504115  | -15.297280 | -5.304250 |

|      |   |     |     |   |            |           |            |           |
|------|---|-----|-----|---|------------|-----------|------------|-----------|
| 1CTQ | A | ALA | 59  | C | -8.191017  | 5.773468  | -13.935150 | -4.944833 |
| 1CTQ | A | GLY | 60  | C | -7.774881  | 6.551167  | -13.749612 | -5.143224 |
| 1CTQ | A | GLN | 61  | C | -7.692459  | 6.656707  | -13.759422 | -5.115185 |
| 1CTQ | A | GLU | 62  | G | -7.326847  | 6.591554  | -13.173387 | -4.896745 |
| 1CTQ | A | GLU | 63  | G | -7.327753  | 6.589094  | -13.168931 | -4.894765 |
| 1CTQ | A | TYR | 64  | G | -7.478410  | 6.864308  | -12.962042 | -4.884111 |
| 1CTQ | A | SER | 65  | H | -7.695231  | 6.659013  | -12.694598 | -4.683860 |
| 1CTQ | A | ALA | 66  | H | -7.778725  | 6.546674  | -12.522178 | -4.646732 |
| 1CTQ | A | MET | 67  | H | -10.379205 | 8.949185  | -15.213697 | -5.092708 |
| 1CTQ | A | ARG | 68  | H | -12.760864 | 10.555718 | -18.562969 | -5.394854 |
| 1CTQ | A | ASP | 69  | H | -13.090615 | 9.887816  | -19.313203 | -5.490459 |
| 1CTQ | A | GLN | 70  | H | -12.817542 | 12.027521 | -17.693949 | -5.375203 |
| 1CTQ | A | TYR | 71  | H | -12.512667 | 13.965576 | -16.170696 | -5.356043 |
| 1CTQ | A | MET | 72  | H | -11.300034 | 10.611276 | -16.199197 | -5.397057 |
| 1CTQ | A | ARG | 73  | H | -9.588439  | 7.231403  | -14.923646 | -4.882161 |
| 1CTQ | A | THR | 74  | H | -9.309683  | 8.909727  | -14.291975 | -5.014790 |
| 1CTQ | A | GLY | 75  | C | -9.294606  | 9.058845  | -14.270668 | -5.018999 |
| 1CTQ | A | GLU | 76  | C | -9.294132  | 9.070633  | -14.266782 | -5.018981 |
| 1CTQ | A | GLY | 77  | E | -9.300647  | 9.187685  | -14.164276 | -4.999240 |
| 1CTQ | A | PHE | 78  | E | -9.815377  | 12.188392 | -13.213860 | -5.202984 |
| 1CTQ | A | LEU | 79  | E | -11.030015 | 16.021708 | -12.903486 | -4.907954 |
| 1CTQ | A | CYS | 80  | E | -11.280395 | 17.248990 | -12.186848 | -4.565964 |
| 1CTQ | A | VAL | 81  | E | -11.122752 | 17.462410 | -11.767530 | -4.439736 |
| 1CTQ | A | PHE | 82  | E | -11.143830 | 16.663932 | -12.463812 | -4.624026 |
| 1CTQ | A | ALA | 83  | E | -10.366288 | 12.319568 | -13.908204 | -4.992492 |
| 1CTQ | A | ILE | 84  | T | -9.962241  | 10.643962 | -14.600388 | -5.138543 |
| 1CTQ | A | ASN | 85  | T | -9.673444  | 9.329620  | -15.318808 | -5.324989 |
| 1CTQ | A | ASN | 86  | T | -9.663273  | 9.212274  | -15.426007 | -5.349747 |
| 1CTQ | A | THR | 87  | H | -9.558368  | 9.340705  | -15.271344 | -5.299461 |
| 1CTQ | A | LYS | 88  | H | -9.661874  | 9.083185  | -15.481316 | -5.339622 |
| 1CTQ | A | SER | 89  | H | -9.874381  | 9.079942  | -15.596479 | -5.374413 |
| 1CTQ | A | PHE | 90  | H | -10.361137 | 10.989679 | -14.705191 | -5.122048 |
| 1CTQ | A | GLU | 91  | H | -10.336085 | 10.844475 | -14.794019 | -5.132011 |
| 1CTQ | A | ASP | 92  | H | -11.050473 | 11.230767 | -15.809606 | -5.339167 |
| 1CTQ | A | ILE | 93  | H | -11.296089 | 11.240293 | -15.739914 | -5.336785 |
| 1CTQ | A | HIS | 94  | H | -11.336820 | 10.922329 | -15.765981 | -5.324025 |
| 1CTQ | A | GLN | 95  | H | -11.358021 | 10.766647 | -15.746380 | -5.315077 |
| 1CTQ | A | TYR | 96  | H | -14.501985 | 14.031792 | -18.299541 | -5.487246 |
| 1CTQ | A | ARG | 97  | H | -16.365564 | 13.168210 | -22.727080 | -6.450292 |
| 1CTQ | A | GLU | 98  | H | -14.013611 | 10.966954 | -19.497086 | -5.613944 |
| 1CTQ | A | GLN | 99  | H | -13.767515 | 11.450251 | -19.271871 | -5.524997 |
| 1CTQ | A | ILE | 100 | H | -12.576530 | 13.948146 | -16.142764 | -5.361229 |
| 1CTQ | A | LYS | 101 | H | -10.166990 | 10.203273 | -14.418210 | -5.206333 |
| 1CTQ | A | ARG | 102 | H | -9.571786  | 8.626893  | -14.462818 | -4.841712 |
| 1CTQ | A | VAL | 103 | H | -8.760398  | 7.748342  | -14.033239 | -4.933650 |
| 1CTQ | A | LYS | 104 | H | -8.023892  | 5.712376  | -14.471062 | -5.126248 |
| 1CTQ | A | ASP | 105 | C | -7.178001  | 5.434547  | -13.111765 | -4.812457 |
| 1CTQ | A | SER | 106 | T | -7.157188  | 5.539618  | -13.091140 | -4.798200 |
| 1CTQ | A | ASP | 107 | T | -7.156356  | 5.589902  | -13.075017 | -4.804126 |
| 1CTQ | A | ASP | 108 | T | -7.185265  | 5.511660  | -13.030968 | -4.795273 |
| 1CTQ | A | VAL | 109 | T | -7.297115  | 5.653520  | -12.691215 | -4.709527 |
| 1CTQ | A | PRO | 110 | C | -8.864021  | 9.747670  | -12.783076 | -4.653418 |
| 1CTQ | A | MET | 111 | E | -9.496344  | 13.013629 | -12.405353 | -4.894193 |
| 1CTQ | A | VAL | 112 | E | -9.917445  | 14.919039 | -11.618678 | -4.449409 |
| 1CTQ | A | LEU | 113 | E | -10.052179 | 15.128042 | -11.502580 | -4.419778 |
| 1CTQ | A | VAL | 114 | E | -10.087467 | 14.623202 | -11.796741 | -4.462926 |
| 1CTQ | A | GLY | 115 | E | -10.108822 | 14.266482 | -12.038535 | -4.529462 |
| 1CTQ | A | ASN | 116 | E | -10.506283 | 12.408043 | -13.937166 | -4.822623 |
| 1CTQ | A | LYS | 117 | T | -8.451810  | 8.044896  | -13.568761 | -5.399633 |
| 1CTQ | A | CYS | 118 | T | -6.575309  | 5.514596  | -11.708205 | -4.736345 |
| 1CTQ | A | ASP | 119 | T | -6.548764  | 5.589125  | -11.771374 | -4.740273 |
| 1CTQ | A | LEU | 120 | T | -6.517584  | 5.610747  | -11.848740 | -4.728786 |
| 1CTQ | A | ALA | 121 | T | -6.509804  | 5.641564  | -11.860838 | -4.721926 |
| 1CTQ | A | ALA | 122 | T | -6.531212  | 5.554727  | -11.801516 | -4.695655 |
| 1CTQ | A | ARG | 123 | T | -7.834099  | 6.767751  | -13.210075 | -4.603162 |
| 1CTQ | A | THR | 124 | C | -8.086043  | 6.570133  | -13.280788 | -4.455947 |
| 1CTQ | A | VAL | 125 | C | -8.699034  | 8.185942  | -13.310315 | -4.329947 |
| 1CTQ | A | GLU | 126 | C | -8.718799  | 8.325649  | -13.378380 | -4.408809 |
| 1CTQ | A | SER | 127 | H | -8.763983  | 8.322028  | -13.285593 | -4.391399 |
| 1CTQ | A | ARG | 128 | H | -8.766711  | 8.318051  | -13.273406 | -4.389447 |
| 1CTQ | A | GLN | 129 | H | -8.886488  | 8.396735  | -13.134129 | -4.401475 |
| 1CTQ | A | ALA | 130 | H | -9.104205  | 8.253662  | -12.998900 | -4.375910 |
| 1CTQ | A | GLN | 131 | H | -11.601568 | 8.608313  | -17.335760 | -4.660289 |
| 1CTQ | A | ASP | 132 | H | -11.138283 | 8.263248  | -15.939464 | -4.164365 |
| 1CTQ | A | LEU | 133 | H | -11.154840 | 8.736293  | -15.589543 | -4.090436 |
| 1CTQ | A | ALA | 134 | H | -10.395135 | 8.450497  | -15.124643 | -4.386306 |
| 1CTQ | A | ARG | 135 | H | -9.732912  | 9.106813  | -14.298107 | -4.605789 |
| 1CTQ | A | SER | 136 | H | -9.303801  | 9.919370  | -13.490366 | -4.628248 |
| 1CTQ | A | TYR | 137 | H | -9.317724  | 10.041775 | -13.432149 | -4.658033 |
| 1CTQ | A | GLY | 138 | C | -9.014282  | 11.753500 | -12.217014 | -4.582101 |
| 1CTQ | A | ILE | 139 | C | -9.052200  | 12.052173 | -12.016209 | -4.591014 |

|      |   |     |     |   |            |           |            |           |
|------|---|-----|-----|---|------------|-----------|------------|-----------|
| 1CTQ | A | PRO | 140 | C | -9.174042  | 12.866582 | -11.548732 | -4.583002 |
| 1CTQ | A | TYR | 141 | E | -9.490259  | 14.440938 | -10.709761 | -4.544771 |
| 1CTQ | A | ILE | 142 | E | -9.484131  | 14.353765 | -10.779672 | -4.547772 |
| 1CTQ | A | GLU | 143 | E | -10.618803 | 14.016484 | -14.174172 | -5.328295 |
| 1CTQ | A | THR | 144 | C | -9.017755  | 10.963632 | -12.612487 | -5.141310 |
| 1CTQ | A | SER | 145 | T | -9.019302  | 10.825209 | -12.679690 | -5.140475 |
| 1CTQ | A | ALA | 146 | T | -9.001520  | 10.759971 | -12.779812 | -5.141223 |
| 1CTQ | A | LYS | 147 | T | -8.680284  | 9.343275  | -13.636812 | -5.268432 |
| 1CTQ | A | THR | 148 | T | -8.608262  | 9.186274  | -13.751321 | -5.234126 |
| 1CTQ | A | ARG | 149 | T | -8.970021  | 7.781926  | -14.897629 | -5.323789 |
| 1CTQ | A | GLN | 150 | T | -8.858799  | 7.837049  | -14.883014 | -5.292193 |
| 1CTQ | A | GLY | 151 | T | -8.126702  | 9.231590  | -12.351986 | -4.775074 |
| 1CTQ | A | VAL | 152 | H | -8.232334  | 9.618021  | -11.856123 | -4.641810 |
| 1CTQ | A | GLU | 153 | H | -8.272287  | 9.716027  | -11.656852 | -4.615649 |
| 1CTQ | A | ASP | 154 | H | -8.277232  | 9.722799  | -11.620029 | -4.611817 |
| 1CTQ | A | ALA | 155 | H | -8.320898  | 9.829604  | -11.368964 | -4.570528 |
| 1CTQ | A | PHE | 156 | H | -11.425937 | 16.259548 | -12.362292 | -4.683603 |
| 1CTQ | A | TYR | 157 | H | -12.842465 | 18.253734 | -14.397623 | -5.180449 |
| 1CTQ | A | THR | 158 | H | -12.680935 | 16.429604 | -14.655267 | -4.900092 |
| 1CTQ | A | LEU | 159 | H | -12.730806 | 16.172717 | -14.652777 | -4.865121 |
| 1CTQ | A | VAL | 160 | H | -12.666778 | 15.970754 | -15.127181 | -5.100699 |
| 1CTQ | A | ARG | 161 | H | -12.010616 | 13.349352 | -16.391795 | -5.733126 |
| 1CTQ | A | GLU | 162 | H | -8.859219  | 10.916236 | -12.123372 | -5.066698 |
| 1CTQ | A | ILE | 163 | H | -7.191113  | 8.005964  | -10.255710 | -3.981675 |
| 1CTQ | A | ARG | 164 | H | -7.191113  | 8.005964  | -10.255710 | -3.981675 |
| 1CTQ | A | GLN | 165 | H | -7.191113  | 8.005964  | -10.255710 | -3.981675 |
| 1CTQ | A | HIS | 166 | C | -7.191113  | 8.005964  | -10.255710 | -3.981675 |
| 1CY5 | A | MET | 1   | C | -10.634385 | 6.860637  | -16.055233 | -4.480675 |
| 1CY5 | A | ASP | 2   | C | -10.634385 | 6.860637  | -16.055233 | -4.480675 |
| 1CY5 | A | ALA | 3   | H | -10.634385 | 6.860637  | -16.055233 | -4.480675 |
| 1CY5 | A | LYS | 4   | H | -10.634385 | 6.860637  | -16.055233 | -4.480675 |
| 1CY5 | A | ALA | 5   | H | -12.121625 | 9.439992  | -17.593826 | -5.067311 |
| 1CY5 | A | ARG | 6   | H | -12.494705 | 13.141717 | -16.194059 | -4.986383 |
| 1CY5 | A | ASN | 7   | H | -10.930613 | 11.669280 | -14.996411 | -5.301188 |
| 1CY5 | A | CYS | 8   | H | -10.627517 | 12.428184 | -14.545034 | -5.238954 |
| 1CY5 | A | LEU | 9   | H | -10.553813 | 12.640528 | -14.495618 | -5.206510 |
| 1CY5 | A | LEU | 10  | H | -10.393587 | 12.097554 | -14.735180 | -5.185476 |
| 1CY5 | A | GLN | 11  | H | -10.239881 | 11.660897 | -14.870365 | -5.163314 |
| 1CY5 | A | HIS | 12  | H | -10.425021 | 11.781774 | -14.863749 | -5.099011 |
| 1CY5 | A | ARG | 13  | H | -10.603137 | 11.179569 | -15.260712 | -5.082025 |
| 1CY5 | A | GLU | 14  | H | -10.287052 | 11.638196 | -14.677064 | -5.156377 |
| 1CY5 | A | ALA | 15  | H | -10.387836 | 12.024525 | -14.520635 | -5.186288 |
| 1CY5 | A | LEU | 16  | H | -10.560147 | 13.028024 | -14.156106 | -5.261806 |
| 1CY5 | A | GLU | 17  | H | -10.529142 | 12.968379 | -14.293524 | -5.315277 |
| 1CY5 | A | LYS | 18  | H | -9.972306  | 13.202634 | -13.638019 | -5.433380 |
| 1CY5 | A | ASP | 19  | H | -9.968363  | 13.581938 | -13.492559 | -5.478471 |
| 1CY5 | A | ILE | 20  | C | -9.206470  | 13.315555 | -12.148750 | -5.184002 |
| 1CY5 | A | LYS | 21  | C | -8.609148  | 12.967725 | -11.516314 | -5.077595 |
| 1CY5 | A | THR | 22  | H | -8.569686  | 13.099288 | -11.535837 | -5.087643 |
| 1CY5 | A | SER | 23  | H | -8.602548  | 13.079240 | -11.446977 | -5.062413 |
| 1CY5 | A | TYR | 24  | H | -8.619756  | 13.055632 | -11.391266 | -5.053413 |
| 1CY5 | A | ILE | 25  | H | -8.807552  | 12.996691 | -11.285100 | -5.045225 |
| 1CY5 | A | MET | 26  | H | -10.124896 | 14.763925 | -12.257921 | -5.261120 |
| 1CY5 | A | ASP | 27  | H | -11.343627 | 12.061259 | -15.634753 | -5.164073 |
| 1CY5 | A | HIS | 28  | H | -11.063278 | 11.753554 | -15.360479 | -5.190869 |
| 1CY5 | A | MET | 29  | H | -8.811135  | 9.382541  | -12.845163 | -4.923567 |
| 1CY5 | A | ILE | 30  | H | -8.061442  | 8.696712  | -12.366557 | -4.720306 |
| 1CY5 | A | SER | 31  | H | -8.002917  | 8.875322  | -12.425779 | -4.748245 |
| 1CY5 | A | ASP | 32  | H | -7.972392  | 8.964131  | -12.490783 | -4.777989 |
| 1CY5 | A | GLY | 33  | C | -7.849166  | 9.309283  | -12.341501 | -4.763666 |
| 1CY5 | A | PHE | 34  | C | -7.954124  | 9.394043  | -12.231877 | -4.712769 |
| 1CY5 | A | LEU | 35  | C | -7.725405  | 9.157590  | -11.574717 | -4.472762 |
| 1CY5 | A | THR | 36  | C | -7.563519  | 8.521798  | -11.892509 | -4.494836 |
| 1CY5 | A | ILE | 37  | H | -7.560341  | 8.425852  | -11.940634 | -4.488265 |
| 1CY5 | A | SER | 38  | H | -7.632776  | 8.112446  | -11.977573 | -4.462132 |
| 1CY5 | A | GLU | 39  | H | -7.645102  | 8.035503  | -11.976490 | -4.465618 |
| 1CY5 | A | GLU | 40  | H | -8.228082  | 7.293251  | -13.173458 | -4.692874 |
| 1CY5 | A | GLU | 41  | H | -7.748916  | 9.254288  | -11.353992 | -4.691416 |
| 1CY5 | A | LYS | 42  | H | -7.542669  | 10.409048 | -11.059276 | -4.887712 |
| 1CY5 | A | VAL | 43  | H | -7.016205  | 10.397560 | -10.515780 | -4.830917 |
| 1CY5 | A | ARG | 44  | H | -6.582829  | 9.028247  | -10.962367 | -4.934782 |
| 1CY5 | A | ASN | 45  | H | -6.574121  | 9.003795  | -11.019404 | -4.945515 |
| 1CY5 | A | GLU | 46  | C | -6.656288  | 8.957629  | -11.003921 | -4.987182 |
| 1CY5 | A | PRO | 47  | C | -6.698579  | 8.664756  | -11.039819 | -4.961788 |
| 1CY5 | A | THR | 48  | C | -6.949191  | 7.757093  | -11.510760 | -5.050800 |
| 1CY5 | A | GLN | 49  | H | -8.902402  | 7.711427  | -14.976990 | -5.559985 |
| 1CY5 | A | GLN | 50  | H | -9.910975  | 7.421089  | -15.873174 | -5.257463 |
| 1CY5 | A | GLN | 51  | H | -9.964133  | 7.307017  | -15.710155 | -5.201420 |
| 1CY5 | A | ARG | 52  | H | -13.221298 | 12.089405 | -19.021848 | -5.703637 |
| 1CY5 | A | ALA | 53  | H | -11.557423 | 17.568283 | -12.167886 | -4.974395 |
| 1CY5 | A | ALA | 54  | H | -11.393151 | 17.183389 | -12.665794 | -5.067138 |

|      |   |     |    |   |            |           |            |           |
|------|---|-----|----|---|------------|-----------|------------|-----------|
| 1CY5 | A | MET | 55 | H | -11.316566 | 17.384082 | -12.815006 | -5.180771 |
| 1CY5 | A | LEU | 56 | H | -11.198289 | 17.694785 | -12.794527 | -5.244315 |
| 1CY5 | A | ILE | 57 | H | -11.114033 | 17.954465 | -12.799934 | -5.316656 |
| 1CY5 | A | LYS | 58 | H | -10.095893 | 15.578059 | -12.250842 | -5.515343 |
| 1CY5 | A | MET | 59 | H | -9.974809  | 15.742660 | -12.377985 | -5.609876 |
| 1CY5 | A | ILE | 60 | H | -9.914268  | 15.544012 | -12.582129 | -5.625430 |
| 1CY5 | A | LEU | 61 | H | -9.904535  | 15.303211 | -12.752796 | -5.644428 |
| 1CY5 | A | LYS | 62 | C | -9.859748  | 14.628285 | -13.198442 | -5.674141 |
| 1CY5 | A | LYS | 63 | C | -10.401620 | 13.527128 | -14.933847 | -5.934515 |
| 1CY5 | A | ASP | 64 | C | -10.722290 | 11.413870 | -16.322992 | -5.917239 |
| 1CY5 | A | ASN | 65 | H | -11.048610 | 9.347441  | -17.723621 | -6.007465 |
| 1CY5 | A | ASP | 66 | H | -11.223912 | 8.780645  | -17.864451 | -5.979823 |
| 1CY5 | A | SER | 67 | H | -12.552416 | 10.788074 | -18.597545 | -5.796054 |
| 1CY5 | A | TYR | 68 | H | -13.183597 | 13.536522 | -17.689172 | -5.741954 |
| 1CY5 | A | VAL | 69 | H | -13.934421 | 16.053371 | -17.353314 | -5.479607 |
| 1CY5 | A | SER | 70 | H | -14.280949 | 18.267342 | -16.583830 | -5.474715 |
| 1CY5 | A | PHE | 71 | H | -13.906897 | 20.473945 | -14.762772 | -5.331942 |
| 1CY5 | A | TYR | 72 | H | -12.765627 | 17.931623 | -13.670648 | -4.859798 |
| 1CY5 | A | ASN | 73 | H | -9.984563  | 13.314302 | -11.752562 | -4.546910 |
| 1CY5 | A | ALA | 74 | H | -9.732819  | 13.642218 | -11.783911 | -4.588005 |
| 1CY5 | A | LEU | 75 | H | -8.310830  | 12.104765 | -10.994960 | -4.955615 |
| 1CY5 | A | LEU | 76 | H | -8.225156  | 12.076538 | -11.227568 | -5.005534 |
| 1CY5 | A | HIS | 77 | H | -8.199385  | 12.003633 | -11.356840 | -5.016775 |
| 1CY5 | A | GLU | 78 | H | -8.220034  | 11.899831 | -11.402546 | -5.044585 |
| 1CY5 | A | GLY | 79 | C | -8.228876  | 11.824056 | -11.427270 | -5.052372 |
| 1CY5 | A | TYR | 80 | C | -9.156616  | 11.348288 | -13.375615 | -5.278324 |
| 1CY5 | A | LYS | 81 | H | -9.060682  | 9.890129  | -12.775890 | -4.365611 |
| 1CY5 | A | ASP | 82 | H | -8.994356  | 10.156423 | -12.281355 | -4.120510 |
| 1CY5 | A | LEU | 83 | H | -8.989990  | 10.488184 | -12.021457 | -4.050600 |
| 1CY5 | A | ALA | 84 | H | -8.997029  | 10.515753 | -11.953236 | -4.016601 |
| 1CY5 | A | ALA | 85 | H | -8.995819  | 10.538761 | -11.962223 | -4.028587 |
| 1CY5 | A | LEU | 86 | H | -9.567059  | 12.082164 | -11.948871 | -4.109203 |
| 1CY5 | A | LEU | 87 | H | -8.560205  | 14.073438 | -10.559548 | -5.234298 |
| 1CY5 | A | HIS | 88 | G | -6.490398  | 10.034855 | -8.802943  | -4.364028 |
| 1CY5 | A | ASP | 89 | G | -5.974633  | 9.542221  | -8.287428  | -3.923429 |
| 1CY5 | A | GLY | 90 | G | -5.974633  | 9.542221  | -8.287428  | -3.923429 |
| 1CY5 | A | ILE | 91 | C | -5.974633  | 9.542221  | -8.287428  | -3.923429 |
| 1CY5 | A | PRO | 92 | C | -5.974633  | 9.542221  | -8.287428  | -3.923429 |
| 1CZT | A | GLY | 0  | C | -4.279772  | 3.174064  | -8.897417  | -3.672832 |
| 1CZT | A | CYS | 1  | C | -4.279772  | 3.174064  | -8.897417  | -3.672832 |
| 1CZT | A | SER | 2  | C | -4.279772  | 3.174064  | -8.897417  | -3.672832 |
| 1CZT | A | THR | 3  | E | -4.279772  | 3.174064  | -8.897417  | -3.672832 |
| 1CZT | A | PRO | 4  | E | -5.392495  | 4.600458  | -10.040855 | -4.225982 |
| 1CZT | A | LEU | 5  | C | -7.421162  | 8.786829  | -12.335441 | -5.433340 |
| 1CZT | A | GLY | 6  | T | -8.068595  | 9.224711  | -13.872398 | -6.191359 |
| 1CZT | A | MET | 7  | T | -7.975675  | 7.756839  | -14.013046 | -5.823657 |
| 1CZT | A | GLU | 8  | T | -7.217022  | 7.323078  | -12.759081 | -5.303300 |
| 1CZT | A | ASN | 9  | T | -6.841845  | 7.264912  | -12.552752 | -5.271387 |
| 1CZT | A | GLY | 10 | T | -6.822694  | 7.271791  | -12.612578 | -5.277996 |
| 1CZT | A | LYS | 11 | T | -6.829634  | 7.269489  | -12.572480 | -5.258949 |
| 1CZT | A | ILE | 12 | T | -6.904055  | 7.210538  | -12.424072 | -5.190637 |
| 1CZT | A | GLU | 13 | T | -7.222566  | 7.299540  | -12.557482 | -5.259469 |
| 1CZT | A | ASN | 14 | G | -8.527088  | 8.130448  | -14.553014 | -5.457084 |
| 1CZT | A | LYS | 15 | G | -8.890951  | 9.449005  | -14.291350 | -5.296015 |
| 1CZT | A | GLN | 16 | G | -9.159555  | 10.582781 | -13.947874 | -5.298192 |
| 1CZT | A | ILE | 17 | E | -8.821069  | 10.332021 | -13.049602 | -4.843217 |
| 1CZT | A | THR | 18 | E | -8.902058  | 10.506316 | -12.736708 | -4.617384 |
| 1CZT | A | ALA | 19 | E | -8.922210  | 10.606453 | -12.627992 | -4.590937 |
| 1CZT | A | SER | 20 | C | -9.039168  | 10.493136 | -12.675834 | -4.582721 |
| 1CZT | A | SER | 21 | C | -9.048378  | 10.473322 | -12.667222 | -4.586907 |
| 1CZT | A | PHE | 22 | C | -8.289383  | 12.393197 | -11.050297 | -5.188945 |
| 1CZT | A | LYS | 23 | C | -5.919575  | 7.204477  | -10.105835 | -4.870222 |
| 1CZT | A | LYS | 24 | E | -2.856897  | 5.522416  | -6.794405  | -4.667724 |
| 1CZT | A | SER | 25 | E | -2.825698  | 5.454774  | -6.952270  | -4.673835 |
| 1CZT | A | TRP | 26 | T | -2.819924  | 5.477883  | -6.981792  | -4.680753 |
| 1CZT | A | TRP | 27 | T | -2.819977  | 5.477255  | -6.981445  | -4.680702 |
| 1CZT | A | GLY | 28 | T | -2.823151  | 5.467980  | -6.964111  | -4.679292 |
| 1CZT | A | ASP | 29 | E | -4.491413  | 4.698619  | -9.783610  | -4.808576 |
| 1CZT | A | TYR | 30 | E | -5.576431  | 7.747467  | -9.880586  | -5.308793 |
| 1CZT | A | TRP | 31 | C | -10.520137 | 14.335585 | -14.561273 | -6.353547 |
| 1CZT | A | GLU | 32 | C | -11.292601 | 16.569064 | -14.295162 | -5.974145 |
| 1CZT | A | PRO | 33 | G | -11.574310 | 16.036680 | -12.725135 | -4.727115 |
| 1CZT | A | PHE | 34 | G | -11.603454 | 15.764458 | -12.443820 | -4.491015 |
| 1CZT | A | ARG | 35 | G | -11.608955 | 15.711934 | -12.424334 | -4.479664 |
| 1CZT | A | ALA | 36 | T | -11.611112 | 15.676921 | -12.427990 | -4.477226 |
| 1CZT | A | ARG | 37 | B | -14.137119 | 10.869604 | -20.079316 | -5.389786 |
| 1CZT | A | LEU | 38 | T | -9.112383  | 6.986288  | -14.675895 | -5.186722 |
| 1CZT | A | ASN | 39 | T | -8.351926  | 4.452757  | -15.119728 | -4.874826 |
| 1CZT | A | ALA | 40 | T | -6.802223  | 5.616276  | -11.232280 | -4.057345 |
| 1CZT | A | GLN | 41 | C | -6.703136  | 5.686642  | -11.474339 | -4.148655 |
| 1CZT | A | GLY | 42 | T | -6.676362  | 5.825611  | -11.504615 | -4.167594 |

|      |   |     |     |   |            |           |            |           |
|------|---|-----|-----|---|------------|-----------|------------|-----------|
| 1CZT | A | ARG | 43  | T | -6.686143  | 5.806361  | -11.451847 | -4.150626 |
| 1CZT | A | VAL | 44  | T | -6.712468  | 5.911978  | -11.277467 | -4.123151 |
| 1CZT | A | ASN | 45  | T | -7.656000  | 6.710403  | -12.655288 | -4.633352 |
| 1CZT | A | ALA | 46  | C | -8.524186  | 8.836048  | -12.161716 | -4.577657 |
| 1CZT | A | TRP | 47  | E | -12.313765 | 14.624162 | -15.770598 | -5.416331 |
| 1CZT | A | GLN | 48  | E | -9.528073  | 8.585392  | -14.870773 | -5.545576 |
| 1CZT | A | ALA | 49  | T | -7.785953  | 6.989995  | -13.139170 | -5.161939 |
| 1CZT | A | LYS | 50  | T | -7.514219  | 6.637550  | -13.555344 | -5.279892 |
| 1CZT | A | ALA | 51  | T | -7.332473  | 6.157867  | -13.837067 | -5.272043 |
| 1CZT | A | ASN | 52  | T | -7.302572  | 6.191136  | -13.932806 | -5.308917 |
| 1CZT | A | ASN | 53  | T | -7.312125  | 6.161631  | -13.926379 | -5.310270 |
| 1CZT | A | ASN | 54  | T | -7.640557  | 5.615864  | -14.582065 | -5.436307 |
| 1CZT | A | LYS | 55  | T | -8.000484  | 5.268170  | -14.842474 | -5.397631 |
| 1CZT | A | GLN | 56  | T | -9.003052  | 7.236221  | -15.819884 | -6.050997 |
| 1CZT | A | TRP | 57  | C | -10.213864 | 9.810855  | -16.070534 | -6.260442 |
| 1CZT | A | LEU | 58  | E | -12.387464 | 14.565454 | -16.566613 | -6.153259 |
| 1CZT | A | GLU | 59  | E | -12.473552 | 14.995819 | -15.655424 | -5.509715 |
| 1CZT | A | ILE | 60  | E | -10.644923 | 13.690270 | -13.490948 | -5.345227 |
| 1CZT | A | ASP | 61  | E | -8.845755  | 12.845221 | -11.674563 | -5.385177 |
| 1CZT | A | LEU | 62  | E | -8.098769  | 13.298428 | -10.675747 | -5.286602 |
| 1CZT | A | LEU | 63  | E | -8.060392  | 13.295161 | -10.813170 | -5.316451 |
| 1CZT | A | LYS | 64  | E | -8.052637  | 13.321639 | -10.836989 | -5.319537 |
| 1CZT | A | ILE | 65  | E | -8.055676  | 13.342100 | -10.817129 | -5.320878 |
| 1CZT | A | LYS | 66  | E | -8.224781  | 13.530663 | -10.570572 | -5.298843 |
| 1CZT | A | LYS | 67  | E | -9.463114  | 14.134275 | -12.721818 | -5.614861 |
| 1CZT | A | ILE | 68  | E | -9.767950  | 16.398918 | -11.086371 | -4.764376 |
| 1CZT | A | THR | 69  | E | -9.782171  | 16.601297 | -10.661530 | -4.506489 |
| 1CZT | A | ALA | 70  | E | -9.857345  | 16.563809 | -10.443981 | -4.362163 |
| 1CZT | A | ILE | 71  | E | -9.876967  | 16.563234 | -10.378102 | -4.333216 |
| 1CZT | A | ILE | 72  | E | -9.977166  | 16.575627 | -10.235826 | -4.284628 |
| 1CZT | A | THR | 73  | E | -10.550701 | 15.597421 | -11.967012 | -4.720637 |
| 1CZT | A | GLN | 74  | E | -11.415829 | 12.234434 | -17.007408 | -5.912115 |
| 1CZT | A | GLY | 75  | C | -8.240697  | 5.914756  | -14.025128 | -5.091376 |
| 1CZT | A | CYS | 76  | E | -6.845311  | 5.121989  | -12.215241 | -4.592750 |
| 1CZT | A | LYS | 77  | E | -5.521640  | 4.621271  | -10.465920 | -4.321953 |
| 1CZT | A | SER | 78  | E | -5.398644  | 4.772208  | -10.592760 | -4.360849 |
| 1CZT | A | LEU | 79  | T | -5.397024  | 4.779165  | -10.602882 | -4.363202 |
| 1CZT | A | SER | 80  | T | -5.401900  | 4.770001  | -10.574711 | -4.357212 |
| 1CZT | A | SER | 81  | E | -5.450799  | 4.746664  | -10.449675 | -4.341357 |
| 1CZT | A | GLU | 82  | E | -6.382007  | 5.453467  | -11.187002 | -4.538850 |
| 1CZT | A | MET | 83  | E | -8.891235  | 7.335477  | -14.319065 | -5.226533 |
| 1CZT | A | TYR | 84  | E | -12.542060 | 13.232688 | -17.075096 | -5.881401 |
| 1CZT | A | VAL | 85  | E | -13.688716 | 17.006289 | -17.236088 | -5.994299 |
| 1CZT | A | LYS | 86  | E | -13.640268 | 17.548367 | -16.822338 | -5.934878 |
| 1CZT | A | SER | 87  | E | -13.830748 | 18.140395 | -16.548896 | -5.701522 |
| 1CZT | A | TYR | 88  | E | -13.817398 | 18.803279 | -16.186401 | -5.692419 |
| 1CZT | A | THR | 89  | E | -13.177154 | 18.515275 | -15.489564 | -5.781493 |
| 1CZT | A | ILE | 90  | E | -12.971489 | 18.457725 | -15.520046 | -5.877060 |
| 1CZT | A | HIS | 91  | E | -11.784761 | 16.992689 | -16.456014 | -7.335325 |
| 1CZT | A | TYR | 92  | E | -9.440802  | 13.490525 | -13.239187 | -6.154569 |
| 1CZT | A | SER | 93  | E | -5.999160  | 6.738427  | -10.416040 | -4.881435 |
| 1CZT | A | GLU | 94  | T | -3.608322  | 5.212792  | -7.952744  | -4.657275 |
| 1CZT | A | GLN | 95  | T | -3.533491  | 5.590708  | -7.974028  | -4.695251 |
| 1CZT | A | GLY | 96  | T | -3.491094  | 5.768677  | -8.004185  | -4.703938 |
| 1CZT | A | VAL | 97  | T | -3.486558  | 5.795387  | -8.011291  | -4.701611 |
| 1CZT | A | GLU | 98  | T | -3.495171  | 5.781416  | -7.975565  | -4.698658 |
| 1CZT | A | TRP | 99  | C | -4.486391  | 8.326516  | -8.233115  | -4.875176 |
| 1CZT | A | LYS | 100 | E | -5.014882  | 8.252666  | -8.425204  | -4.755490 |
| 1CZT | A | PRO | 101 | E | -6.375539  | 9.263281  | -8.916285  | -4.382818 |
| 1CZT | A | TYR | 102 | C | -11.405762 | 14.295576 | -14.954767 | -5.258756 |
| 1CZT | A | ARG | 103 | C | -8.176832  | 8.326168  | -11.999526 | -4.440413 |
| 1CZT | A | LEU | 104 | T | -5.383267  | 5.163429  | -9.455574  | -4.049733 |
| 1CZT | A | LYS | 105 | T | -4.388130  | 3.424555  | -9.085452  | -3.812908 |
| 1CZT | A | SER | 106 | T | -4.312628  | 3.431562  | -9.268301  | -3.851477 |
| 1CZT | A | SER | 107 | T | -4.311576  | 3.436610  | -9.275599  | -3.853410 |
| 1CZT | A | MET | 108 | C | -4.299395  | 3.508197  | -9.305404  | -3.871985 |
| 1CZT | A | VAL | 109 | C | -4.402093  | 3.200658  | -9.279719  | -3.838318 |
| 1CZT | A | ASP | 110 | C | -5.461916  | 4.078133  | -10.672292 | -4.236561 |
| 1CZT | A | LYS | 111 | C | -6.499748  | 7.185718  | -11.012226 | -4.766227 |
| 1CZT | A | ILE | 112 | E | -6.543105  | 7.259592  | -10.833914 | -4.753830 |
| 1CZT | A | PHE | 113 | E | -8.438379  | 12.497671 | -11.444870 | -5.095398 |
| 1CZT | A | GLU | 114 | E | -8.316098  | 10.634838 | -12.349281 | -5.077290 |
| 1CZT | A | GLY | 115 | C | -8.136227  | 9.648427  | -12.847036 | -5.135208 |
| 1CZT | A | ASN | 116 | C | -8.072424  | 7.089391  | -14.075286 | -5.132644 |
| 1CZT | A | THR | 117 | C | -5.314435  | 4.962529  | -10.253485 | -4.688489 |
| 1CZT | A | ASN | 118 | T | -5.265107  | 5.060223  | -10.398184 | -4.728338 |
| 1CZT | A | THR | 119 | T | -5.250843  | 5.108898  | -10.434274 | -4.731308 |
| 1CZT | A | LYS | 120 | T | -5.217323  | 5.268928  | -10.458064 | -4.741981 |
| 1CZT | A | GLY | 121 | T | -5.218814  | 5.268281  | -10.449545 | -4.741519 |
| 1CZT | A | HIS | 122 | C | -6.313192  | 7.033640  | -11.698236 | -5.047582 |
| 1CZT | A | VAL | 123 | E | -6.687963  | 7.780392  | -11.374651 | -4.925145 |



|      |   |     |     |   |            |           |            |           |
|------|---|-----|-----|---|------------|-----------|------------|-----------|
| 1CZT | A | LYS | 124 | E | -6.883272  | 8.148317  | -11.078580 | -4.952533 |
| 1CZT | A | ASN | 125 | E | -8.682141  | 10.932801 | -12.930238 | -5.224104 |
| 1CZT | A | PHE | 126 | E | -8.467034  | 13.701883 | -10.218979 | -4.578699 |
| 1CZT | A | PHE | 127 | E | -8.331658  | 14.381927 | -9.475851  | -4.359683 |
| 1CZT | A | ASN | 128 | E | -6.743201  | 11.744592 | -7.631799  | -3.847995 |
| 1CZT | A | PRO | 129 | E | -6.590178  | 12.086821 | -7.649292  | -3.884652 |
| 1CZT | A | PRO | 130 | E | -6.589972  | 12.088799 | -7.649744  | -3.884673 |
| 1CZT | A | ILE | 131 | E | -6.607204  | 12.035903 | -7.599109  | -3.872356 |
| 1CZT | A | ILE | 132 | E | -6.618141  | 11.982149 | -7.574128  | -3.867814 |
| 1CZT | A | SER | 133 | E | -7.449929  | 13.305128 | -7.810673  | -4.043623 |
| 1CZT | A | ARG | 134 | E | -10.776056 | 15.521958 | -11.507435 | -4.506578 |
| 1CZT | A | PHE | 135 | E | -13.348912 | 18.134570 | -14.515055 | -4.874272 |
| 1CZT | A | ILE | 136 | E | -13.078034 | 19.478494 | -12.632254 | -4.355888 |
| 1CZT | A | ARG | 137 | E | -12.127804 | 18.389318 | -12.302138 | -4.690797 |
| 1CZT | A | VAL | 138 | E | -9.714378  | 15.479214 | -10.125212 | -4.471412 |
| 1CZT | A | ILE | 139 | E | -9.474182  | 15.776089 | -10.343367 | -4.630771 |
| 1CZT | A | PRO | 140 | E | -9.334521  | 15.664773 | -10.719955 | -4.801584 |
| 1CZT | A | LYS | 141 | E | -9.290756  | 15.409158 | -11.060236 | -4.902284 |
| 1CZT | A | THR | 142 | E | -9.291302  | 15.363297 | -11.091278 | -4.909146 |
| 1CZT | A | TRP | 143 | E | -9.676889  | 15.292251 | -12.048695 | -5.321203 |
| 1CZT | A | ASN | 144 | E | -9.972894  | 13.977089 | -13.510595 | -5.671170 |
| 1CZT | A | GLN | 145 | T | -10.485490 | 12.200133 | -15.610965 | -5.987590 |
| 1CZT | A | SER | 146 | T | -10.951316 | 12.190262 | -15.822314 | -5.758265 |
| 1CZT | A | ILE | 147 | C | -11.011731 | 12.346070 | -15.617273 | -5.741071 |
| 1CZT | A | THR | 148 | E | -11.044319 | 12.282204 | -15.560418 | -5.741559 |
| 1CZT | A | LEU | 149 | E | -11.900985 | 14.987713 | -14.510945 | -5.486314 |
| 1CZT | A | ARG | 150 | E | -14.440287 | 18.221018 | -16.838488 | -5.540007 |
| 1CZT | A | LEU | 151 | E | -12.807523 | 19.468020 | -13.298821 | -5.415725 |
| 1CZT | A | GLU | 152 | E | -12.820686 | 19.490441 | -13.289153 | -5.452968 |
| 1CZT | A | LEU | 153 | E | -11.896681 | 18.070340 | -14.760021 | -6.687913 |
| 1CZT | A | PHE | 154 | E | -9.371877  | 12.624249 | -13.467412 | -6.160619 |
| 1CZT | A | GLY | 155 | E | -5.598660  | 6.479413  | -10.107458 | -4.926530 |
| 1CZT | A | CYS | 156 | E | -4.449117  | 5.770116  | -8.109003  | -4.006914 |
| 1CZT | A | ASP | 157 | E | -4.449117  | 5.770116  | -8.109003  | -4.006914 |
| 1CZT | A | ILE | 158 | C | -4.449117  | 5.770116  | -8.109003  | -4.006914 |
| 1CZT | A | TYR | 159 | C | -4.449117  | 5.770116  | -8.109003  | -4.006914 |
| 1D7P | M | LEU | 1   | C | -3.643243  | 0.818293  | -8.881493  | -3.541802 |
| 1D7P | M | ASN | 2   | T | -3.643243  | 0.818293  | -8.881493  | -3.541802 |
| 1D7P | M | SER | 3   | T | -3.643243  | 0.818293  | -8.881493  | -3.541802 |
| 1D7P | M | CYS | 4   | T | -3.643243  | 0.818293  | -8.881493  | -3.541802 |
| 1D7P | M | SER | 5   | T | -5.519317  | 2.623546  | -12.025043 | -4.495284 |
| 1D7P | M | MET | 6   | E | -6.371953  | 4.984567  | -12.863038 | -4.992660 |
| 1D7P | M | PRO | 7   | E | -6.707349  | 6.658537  | -12.300146 | -4.991777 |
| 1D7P | M | LEU | 8   | C | -7.143306  | 9.449320  | -10.389582 | -4.347492 |
| 1D7P | M | GLY | 9   | T | -7.122614  | 9.450511  | -10.439373 | -4.361678 |
| 1D7P | M | MET | 10  | T | -7.506713  | 9.772541  | -11.854985 | -5.031325 |
| 1D7P | M | GLU | 11  | T | -6.954737  | 8.479914  | -10.969897 | -4.603744 |
| 1D7P | M | SER | 12  | T | -6.945568  | 8.240363  | -11.048474 | -4.555334 |
| 1D7P | M | LYS | 13  | T | -6.934671  | 8.206561  | -11.104720 | -4.556247 |
| 1D7P | M | ALA | 14  | T | -6.947534  | 8.106427  | -11.061820 | -4.500782 |
| 1D7P | M | ILE | 15  | T | -7.069366  | 8.024945  | -10.798053 | -4.363437 |
| 1D7P | M | SER | 16  | T | -8.228675  | 6.903826  | -13.588408 | -4.425637 |
| 1D7P | M | ASP | 17  | G | -8.498670  | 6.989862  | -14.384169 | -4.756645 |
| 1D7P | M | ALA | 18  | G | -8.632510  | 7.346488  | -14.338281 | -4.759165 |
| 1D7P | M | GLN | 19  | E | -8.993708  | 8.744359  | -14.355362 | -5.055671 |
| 1D7P | M | ILE | 20  | G | -8.839744  | 9.194646  | -13.796778 | -4.881307 |
| 1D7P | M | THR | 21  | E | -8.841595  | 10.093312 | -13.210690 | -4.791717 |
| 1D7P | M | ALA | 22  | E | -9.002532  | 10.680668 | -12.753819 | -4.666374 |
| 1D7P | M | SER | 23  | T | -9.132453  | 10.770564 | -12.697902 | -4.697729 |
| 1D7P | M | SER | 24  | T | -9.132161  | 10.772667 | -12.704566 | -4.702665 |
| 1D7P | M | TYR | 25  | T | -9.033516  | 11.224511 | -12.685381 | -4.981992 |
| 1D7P | M | PHE | 26  | C | -7.386032  | 6.305558  | -12.101192 | -4.565942 |
| 1D7P | M | THR | 27  | E | -4.424343  | 4.213749  | -8.865337  | -4.236822 |
| 1D7P | M | ASN | 28  | E | -4.212306  | 4.323505  | -9.068843  | -4.294979 |
| 1D7P | M | MET | 29  | T | -4.211965  | 4.327212  | -9.070523  | -4.295453 |
| 1D7P | M | PHE | 30  | T | -4.212055  | 4.326187  | -9.069992  | -4.295344 |
| 1D7P | M | ALA | 31  | E | -4.214761  | 4.317912  | -9.056161  | -4.294153 |
| 1D7P | M | THR | 32  | E | -4.923498  | 4.585940  | -9.536579  | -4.426654 |
| 1D7P | M | TRP | 33  | C | -8.624034  | 10.806264 | -12.031063 | -5.118123 |
| 1D7P | M | SER | 34  | C | -10.375434 | 11.940720 | -13.777529 | -4.805169 |
| 1D7P | M | PRO | 35  | G | -10.455598 | 11.780405 | -13.577349 | -4.695914 |
| 1D7P | M | SER | 36  | G | -10.484124 | 11.612750 | -13.538394 | -4.674158 |
| 1D7P | M | LYS | 37  | G | -10.506625 | 11.475245 | -13.499914 | -4.656211 |
| 1D7P | M | ALA | 38  | T | -10.508756 | 11.458760 | -13.493222 | -4.653471 |
| 1D7P | M | ARG | 39  | B | -12.810290 | 12.015939 | -17.839119 | -5.436120 |
| 1D7P | M | LEU | 40  | T | -7.930145  | 8.820460  | -11.902627 | -4.985552 |
| 1D7P | M | HIS | 41  | T | -6.138490  | 5.631907  | -10.482082 | -4.260718 |
| 1D7P | M | LEU | 42  | T | -5.950168  | 5.667591  | -10.611890 | -4.250390 |
| 1D7P | M | GLN | 43  | C | -5.869032  | 5.544007  | -10.826651 | -4.276324 |
| 1D7P | M | GLY | 44  | T | -5.759963  | 5.809512  | -10.803388 | -4.296142 |
| 1D7P | M | ARG | 45  | T | -5.775342  | 5.730514  | -10.774548 | -4.277987 |

|      |   |     |     |   |            |           |            |           |
|------|---|-----|-----|---|------------|-----------|------------|-----------|
| 1D7P | M | SER | 46  | T | -6.204627  | 6.008377  | -11.162245 | -4.335508 |
| 1D7P | M | ASN | 47  | T | -6.525682  | 6.185005  | -11.308771 | -4.416671 |
| 1D7P | M | ALA | 48  | C | -6.816269  | 7.124125  | -10.688050 | -4.393829 |
| 1D7P | M | TRP | 49  | B | -11.744956 | 14.344932 | -13.881514 | -4.636064 |
| 1D7P | M | ARG | 50  | C | -10.478368 | 11.529504 | -14.274990 | -5.322250 |
| 1D7P | M | PRO | 51  | T | -7.988017  | 9.370255  | -11.972899 | -5.165242 |
| 1D7P | M | GLN | 52  | T | -7.766647  | 8.915530  | -12.400573 | -5.181410 |
| 1D7P | M | VAL | 53  | T | -7.592462  | 8.035093  | -12.750652 | -5.034012 |
| 1D7P | M | ASN | 54  | T | -7.538592  | 8.041480  | -12.868487 | -5.058369 |
| 1D7P | M | ASN | 55  | T | -7.530923  | 8.076253  | -12.878229 | -5.064230 |
| 1D7P | M | PRO | 56  | T | -7.890423  | 7.028286  | -13.665768 | -4.982184 |
| 1D7P | M | LYS | 57  | T | -8.177673  | 6.477189  | -13.866179 | -4.835646 |
| 1D7P | M | GLU | 58  | T | -8.860228  | 8.678868  | -14.063559 | -5.339757 |
| 1D7P | M | TRP | 59  | C | -9.843851  | 11.061564 | -13.877723 | -5.449232 |
| 1D7P | M | LEU | 60  | E | -11.993435 | 14.078074 | -15.045875 | -5.458481 |
| 1D7P | M | GLN | 61  | E | -14.173011 | 15.574115 | -18.745723 | -6.125017 |
| 1D7P | M | VAL | 62  | E | -12.665105 | 14.180008 | -16.309478 | -5.742565 |
| 1D7P | M | ASP | 63  | E | -11.628078 | 14.072062 | -15.923740 | -6.271406 |
| 1D7P | M | PHE | 64  | E | -10.733732 | 15.249476 | -14.306953 | -6.269257 |
| 1D7P | M | GLN | 65  | E | -10.451934 | 14.641684 | -14.783837 | -6.396694 |
| 1D7P | M | LYS | 66  | E | -10.419646 | 14.717534 | -14.866434 | -6.418899 |
| 1D7P | M | THR | 67  | E | -10.412528 | 14.777138 | -14.827855 | -6.404470 |
| 1D7P | M | MET | 68  | E | -10.347925 | 14.698784 | -14.549527 | -6.188614 |
| 1D7P | M | LYS | 69  | E | -9.937666  | 14.093654 | -12.671409 | -5.130184 |
| 1D7P | M | VAL | 70  | E | -9.096349  | 13.667604 | -10.674134 | -4.468869 |
| 1D7P | M | THR | 71  | E | -8.987155  | 13.578362 | -10.910312 | -4.534807 |
| 1D7P | M | GLY | 72  | E | -8.984779  | 13.564475 | -10.932361 | -4.538299 |
| 1D7P | M | VAL | 73  | E | -8.992149  | 13.548304 | -10.908294 | -4.530412 |
| 1D7P | M | THR | 74  | E | -9.080091  | 13.451391 | -10.811483 | -4.507506 |
| 1D7P | M | THR | 75  | E | -9.938802  | 13.142697 | -12.701723 | -5.013252 |
| 1D7P | M | GLN | 76  | E | -10.856986 | 12.326247 | -15.915108 | -5.667715 |
| 1D7P | M | GLY | 77  | C | -6.372803  | 8.758299  | -9.143434  | -4.384381 |
| 1D7P | M | VAL | 78  | E | -4.813704  | 7.438885  | -7.458802  | -3.945269 |
| 1D7P | M | LYS | 79  | E | -2.331948  | 6.170434  | -5.141658  | -4.161517 |
| 1D7P | M | SER | 80  | E | -2.307760  | 6.165463  | -5.256540  | -4.172523 |
| 1D7P | M | LEU | 81  | T | -2.307260  | 6.167222  | -5.260967  | -4.173207 |
| 1D7P | M | LEU | 82  | T | -2.307906  | 6.164134  | -5.256512  | -4.172796 |
| 1D7P | M | THR | 83  | E | -2.316296  | 6.143972  | -5.224041  | -4.174188 |
| 1D7P | M | SER | 84  | E | -4.225406  | 5.855331  | -7.868047  | -4.288432 |
| 1D7P | M | MET | 85  | E | -6.524223  | 8.009841  | -10.299253 | -4.817406 |
| 1D7P | M | TYR | 86  | E | -10.831410 | 13.792775 | -13.634570 | -5.367832 |
| 1D7P | M | VAL | 87  | E | -12.809162 | 18.338191 | -14.988133 | -5.585040 |
| 1D7P | M | LYS | 88  | E | -12.261083 | 19.676494 | -13.104638 | -5.517513 |
| 1D7P | M | GLU | 89  | E | -12.167911 | 19.691023 | -13.136168 | -5.506901 |
| 1D7P | M | PHE | 90  | E | -12.105244 | 19.717008 | -13.058367 | -5.434147 |
| 1D7P | M | LEU | 91  | E | -11.957646 | 18.512299 | -13.571832 | -5.362166 |
| 1D7P | M | ILE | 92  | E | -12.019625 | 18.299752 | -13.666820 | -5.365989 |
| 1D7P | M | SER | 93  | E | -12.293624 | 15.185397 | -15.712032 | -5.318182 |
| 1D7P | M | SER | 94  | E | -11.003419 | 7.431795  | -17.903645 | -5.688118 |
| 1D7P | M | SER | 95  | E | -8.697334  | 4.281391  | -15.564945 | -5.142833 |
| 1D7P | M | GLN | 96  | T | -6.898277  | 3.149618  | -13.575565 | -4.885148 |
| 1D7P | M | ASP | 97  | T | -6.123827  | 6.545122  | -11.526445 | -5.201262 |
| 1D7P | M | GLY | 98  | T | -5.986179  | 6.952486  | -11.411281 | -5.192219 |
| 1D7P | M | HIS | 99  | T | -5.963033  | 7.150657  | -11.360698 | -5.182615 |
| 1D7P | M | GLN | 100 | T | -5.968789  | 7.179740  | -11.320024 | -5.183111 |
| 1D7P | M | TRP | 101 | C | -6.099685  | 8.191850  | -10.786719 | -5.259932 |
| 1D7P | M | THR | 102 | E | -6.813301  | 9.099665  | -10.837337 | -5.124624 |
| 1D7P | M | LEU | 103 | E | -7.883999  | 12.189430 | -10.197822 | -4.987053 |
| 1D7P | M | PHE | 104 | C | -9.182825  | 12.471569 | -13.106642 | -5.771529 |
| 1D7P | M | PHE | 105 | E | -5.623987  | 5.426035  | -10.624984 | -4.902553 |
| 1D7P | M | GLN | 106 | E | -3.899218  | 4.709876  | -8.507400  | -4.577872 |
| 1D7P | M | ASN | 107 | T | -3.871450  | 4.784975  | -8.576266  | -4.585194 |
| 1D7P | M | GLY | 108 | T | -3.853176  | 4.883356  | -8.590426  | -4.580923 |
| 1D7P | M | LYS | 109 | E | -3.853221  | 4.882904  | -8.590072  | -4.580830 |
| 1D7P | M | VAL | 110 | E | -3.883842  | 4.854297  | -8.481193  | -4.563192 |
| 1D7P | M | LYS | 111 | C | -5.390939  | 7.022310  | -9.596877  | -4.606790 |
| 1D7P | M | VAL | 112 | C | -5.924195  | 8.020394  | -9.024176  | -4.433083 |
| 1D7P | M | PHE | 113 | E | -9.848156  | 13.164567 | -12.504543 | -4.832340 |
| 1D7P | M | GLN | 114 | E | -10.615393 | 10.926564 | -15.969377 | -5.474516 |
| 1D7P | M | GLY | 115 | C | -9.791074  | 8.006264  | -15.873148 | -5.462729 |
| 1D7P | M | ASN | 116 | C | -9.820234  | 7.588667  | -16.018247 | -5.447415 |
| 1D7P | M | GLN | 117 | C | -8.221636  | 8.327320  | -12.669271 | -4.930858 |
| 1D7P | M | ASP | 118 | T | -8.005152  | 8.715354  | -12.552395 | -4.902388 |
| 1D7P | M | SER | 119 | T | -7.973015  | 8.809184  | -12.568076 | -4.889277 |
| 1D7P | M | PHE | 120 | T | -7.605646  | 9.442067  | -11.382803 | -4.498178 |
| 1D7P | M | THR | 121 | T | -7.478745  | 9.181635  | -11.432851 | -4.397946 |
| 1D7P | M | PRO | 122 | C | -7.003311  | 8.868373  | -10.088620 | -3.940170 |
| 1D7P | M | VAL | 123 | E | -7.007354  | 8.903728  | -9.998200  | -3.888047 |
| 1D7P | M | VAL | 124 | E | -6.659229  | 9.396671  | -9.648237  | -4.016137 |
| 1D7P | M | ASN | 125 | E | -6.629914  | 9.378104  | -9.646503  | -4.010676 |
| 1D7P | M | CYS | 126 | E | -4.747784  | 8.957257  | -5.881594  | -3.425315 |

|      |   |     |     |   |            |           |            |           |
|------|---|-----|-----|---|------------|-----------|------------|-----------|
| 1D7P | M | LEU | 127 | E | -4.725419  | 9.093887  | -5.881812  | -3.432828 |
| 1D7P | M | ASP | 128 | E | -4.520166  | 8.993632  | -6.112711  | -3.480755 |
| 1D7P | M | PRO | 129 | E | -4.517052  | 9.017812  | -6.112491  | -3.482821 |
| 1D7P | M | PRO | 130 | E | -4.519363  | 9.015467  | -6.097332  | -3.480710 |
| 1D7P | M | LEU | 131 | E | -5.146858  | 9.157474  | -6.786116  | -3.628737 |
| 1D7P | M | LEU | 132 | E | -5.212365  | 8.882934  | -6.769724  | -3.623120 |
| 1D7P | M | THR | 133 | E | -6.915465  | 11.110665 | -8.318241  | -4.092101 |
| 1D7P | M | ARG | 134 | E | -9.954417  | 13.375704 | -11.582747 | -4.566576 |
| 1D7P | M | TYR | 135 | E | -13.555459 | 16.892635 | -15.751344 | -5.225938 |
| 1D7P | M | LEU | 136 | E | -13.862561 | 18.451334 | -15.196665 | -5.105266 |
| 1D7P | M | ARG | 137 | E | -14.120808 | 18.796670 | -15.464734 | -5.167983 |
| 1D7P | M | ILE | 138 | E | -12.870330 | 16.507713 | -14.732713 | -5.121581 |
| 1D7P | M | HIS | 139 | E | -12.740667 | 16.746332 | -14.861970 | -5.199986 |
| 1D7P | M | PRO | 140 | E | -12.462386 | 16.738578 | -14.659687 | -5.124502 |
| 1D7P | M | GLN | 141 | E | -11.635674 | 14.451639 | -14.906628 | -5.439145 |
| 1D7P | M | SER | 142 | E | -11.495150 | 14.045200 | -15.216879 | -5.464634 |
| 1D7P | M | TRP | 143 | E | -11.023049 | 14.379669 | -14.191429 | -5.325049 |
| 1D7P | M | VAL | 144 | E | -10.209836 | 12.848941 | -13.320141 | -4.938850 |
| 1D7P | M | HIS | 145 | T | -10.132153 | 13.147546 | -13.240304 | -4.935311 |
| 1D7P | M | GLN | 146 | T | -10.168761 | 13.108988 | -13.129767 | -4.896966 |
| 1D7P | M | ILE | 147 | C | -10.182163 | 13.123483 | -13.054947 | -4.881609 |
| 1D7P | M | ALA | 148 | C | -10.273058 | 12.852921 | -12.992258 | -4.828154 |
| 1D7P | M | LEU | 149 | B | -11.335486 | 15.380068 | -12.791058 | -4.918013 |
| 1D7P | M | ARG | 150 | E | -14.231604 | 17.865957 | -16.510951 | -5.318250 |
| 1D7P | M | MET | 151 | E | -11.851031 | 15.274141 | -14.014056 | -5.299829 |
| 1D7P | M | GLU | 152 | E | -11.851064 | 15.256708 | -14.061579 | -5.329680 |
| 1D7P | M | VAL | 153 | E | -11.100512 | 14.466103 | -14.947864 | -6.129884 |
| 1D7P | M | LEU | 154 | E | -9.342166  | 11.202243 | -13.929621 | -5.943240 |
| 1D7P | M | GLY | 155 | E | -6.287801  | 6.626622  | -10.902363 | -4.931816 |
| 1D7P | M | CYS | 156 | E | -5.070002  | 5.712923  | -8.882365  | -4.005424 |
| 1D7P | M | GLU | 157 | E | -5.070002  | 5.712923  | -8.882365  | -4.005424 |
| 1D7P | M | ALA | 158 | C | -5.070002  | 5.712923  | -8.882365  | -4.005424 |
| 1D7P | M | GLN | 159 | C | -5.070002  | 5.712923  | -8.882365  | -4.005424 |
| 1DV8 | A | CYS | 153 | C | -3.716559  | 2.645865  | -8.031519  | -3.452165 |
| 1DV8 | A | PRO | 154 | T | -3.716559  | 2.645865  | -8.031519  | -3.452165 |
| 1DV8 | A | VAL | 155 | T | -3.716559  | 2.645865  | -8.031519  | -3.452165 |
| 1DV8 | A | ASN | 156 | T | -3.716559  | 2.645865  | -8.031519  | -3.452165 |
| 1DV8 | A | TRP | 157 | T | -5.237491  | 7.859362  | -8.530734  | -4.528046 |
| 1DV8 | A | VAL | 158 | E | -6.841740  | 9.384370  | -11.190125 | -5.315207 |
| 1DV8 | A | GLU | 159 | E | -7.450403  | 10.168219 | -12.170093 | -5.737104 |
| 1DV8 | A | HIS | 160 | E | -8.178293  | 8.524976  | -12.864079 | -4.713683 |
| 1DV8 | A | GLU | 161 | T | -8.195443  | 8.386184  | -12.785690 | -4.637819 |
| 1DV8 | A | ARG | 162 | T | -8.217649  | 8.178625  | -12.741351 | -4.584752 |
| 1DV8 | A | SER | 163 | E | -8.535913  | 8.363934  | -12.929698 | -4.806418 |
| 1DV8 | A | CYS | 164 | E | -9.838455  | 7.670636  | -14.824333 | -4.878428 |
| 1DV8 | A | TYR | 165 | E | -13.255549 | 11.566594 | -17.577049 | -5.151455 |
| 1DV8 | A | TRP | 166 | E | -14.486836 | 15.011632 | -17.685455 | -5.211376 |
| 1DV8 | A | PHE | 167 | E | -9.930222  | 11.840803 | -13.179312 | -5.158806 |
| 1DV8 | A | SER | 168 | C | -9.120701  | 9.597554  | -13.692871 | -5.170729 |
| 1DV8 | A | ARG | 169 | C | -8.642463  | 9.263553  | -13.087393 | -4.833132 |
| 1DV8 | A | SER | 170 | C | -8.611209  | 9.459308  | -13.062432 | -4.833706 |
| 1DV8 | A | GLY | 171 | C | -8.588357  | 9.607432  | -13.051461 | -4.837863 |
| 1DV8 | A | LYS | 172 | B | -8.640522  | 9.406984  | -13.056781 | -4.802396 |
| 1DV8 | A | ALA | 173 | C | -8.834453  | 9.851161  | -12.652249 | -4.599231 |
| 1DV8 | A | TRP | 174 | H | -9.690119  | 12.649582 | -12.848297 | -4.725188 |
| 1DV8 | A | ALA | 175 | H | -9.796558  | 11.641285 | -13.487605 | -4.702849 |
| 1DV8 | A | ASP | 176 | H | -9.995608  | 10.946476 | -13.803073 | -4.611887 |
| 1DV8 | A | ALA | 177 | H | -10.133854 | 10.651116 | -13.770169 | -4.543492 |
| 1DV8 | A | ASP | 178 | H | -10.750028 | 8.397108  | -15.895795 | -4.884388 |
| 1DV8 | A | ASN | 179 | H | -10.754106 | 8.224589  | -15.974447 | -4.882111 |
| 1DV8 | A | TYR | 180 | H | -12.140438 | 10.396334 | -17.825613 | -5.223352 |
| 1DV8 | A | CYS | 181 | H | -10.378258 | 5.795457  | -16.312975 | -4.623202 |
| 1DV8 | A | ARG | 182 | H | -8.275437  | 6.702807  | -12.686089 | -4.255148 |
| 1DV8 | A | LEU | 183 | H | -8.074948  | 7.186550  | -12.672434 | -4.331148 |
| 1DV8 | A | GLU | 184 | H | -8.050246  | 7.387675  | -12.657033 | -4.345393 |
| 1DV8 | A | ASP | 185 | C | -8.036704  | 7.498031  | -12.638220 | -4.338248 |
| 1DV8 | A | ALA | 186 | C | -8.045521  | 7.562032  | -12.566463 | -4.331789 |
| 1DV8 | A | HIS | 187 | E | -8.675850  | 9.259064  | -12.522769 | -4.495748 |
| 1DV8 | A | LEU | 188 | E | -8.827097  | 15.204626 | -9.095872  | -4.038879 |
| 1DV8 | A | VAL | 189 | C | -8.443522  | 14.400053 | -8.917870  | -3.923043 |
| 1DV8 | A | VAL | 190 | C | -8.427837  | 14.446632 | -8.962505  | -3.962051 |
| 1DV8 | A | VAL | 191 | C | -8.413874  | 14.363413 | -9.085751  | -3.994913 |
| 1DV8 | A | THR | 192 | C | -8.414511  | 14.319290 | -9.120198  | -4.005547 |
| 1DV8 | A | SER | 193 | C | -8.682967  | 13.255804 | -9.763362  | -4.063364 |
| 1DV8 | A | TRP | 194 | H | -9.746569  | 12.987227 | -12.370132 | -4.766833 |
| 1DV8 | A | GLU | 195 | H | -10.368910 | 11.638609 | -14.151864 | -5.168794 |
| 1DV8 | A | GLU | 196 | H | -11.396146 | 10.436358 | -16.591551 | -5.746836 |
| 1DV8 | A | GLN | 197 | H | -14.181762 | 13.053367 | -20.068422 | -5.997068 |
| 1DV8 | A | LYS | 198 | H | -11.170970 | 13.942267 | -12.948120 | -4.647634 |
| 1DV8 | A | PHE | 199 | H | -10.748884 | 14.218363 | -12.756501 | -4.641727 |
| 1DV8 | A | VAL | 200 | H | -10.459445 | 13.762269 | -12.851068 | -4.575755 |

|      |   |     |     |   |            |           |            |           |
|------|---|-----|-----|---|------------|-----------|------------|-----------|
| 1DV8 | A | GLN | 201 | H | -8.765765  | 10.065077 | -12.307726 | -4.820003 |
| 1DV8 | A | HIS | 202 | H | -6.895715  | 8.713503  | -9.768191  | -4.161876 |
| 1DV8 | A | HIS | 203 | H | -6.849007  | 8.765406  | -9.863430  | -4.160815 |
| 1DV8 | A | ILE | 204 | H | -6.598270  | 8.546791  | -10.021654 | -4.177923 |
| 1DV8 | A | GLY | 205 | T | -6.443732  | 8.512588  | -10.198762 | -4.272808 |
| 1DV8 | A | PRO | 206 | T | -6.453725  | 8.500438  | -10.161520 | -4.263330 |
| 1DV8 | A | VAL | 207 | T | -6.812319  | 8.373426  | -10.582586 | -4.372040 |
| 1DV8 | A | ASN | 208 | C | -6.856329  | 8.293647  | -10.548063 | -4.389542 |
| 1DV8 | A | THR | 209 | E | -7.308572  | 8.474253  | -10.804586 | -4.594670 |
| 1DV8 | A | TRP | 210 | E | -10.044330 | 15.305977 | -11.577361 | -4.980129 |
| 1DV8 | A | MET | 211 | E | -11.157397 | 16.915441 | -13.560605 | -5.633586 |
| 1DV8 | A | GLY | 212 | E | -11.116880 | 16.484258 | -13.985050 | -5.741294 |
| 1DV8 | A | LEU | 213 | E | -11.166025 | 14.537631 | -14.980425 | -5.642185 |
| 1DV8 | A | HIS | 214 | E | -8.218164  | 8.027343  | -13.658346 | -5.740525 |
| 1DV8 | A | ASP | 215 | T | -6.275153  | 5.818793  | -11.879818 | -5.316990 |
| 1DV8 | A | GLN | 216 | T | -6.053559  | 7.632070  | -11.142498 | -5.368980 |
| 1DV8 | A | ASN | 217 | T | -5.694294  | 9.009604  | -9.974599  | -5.143975 |
| 1DV8 | A | GLY | 218 | T | -5.694173  | 9.011422  | -9.974647  | -5.143931 |
| 1DV8 | A | PRO | 219 | C | -5.702552  | 9.025907  | -9.922303  | -5.135409 |
| 1DV8 | A | TRP | 220 | C | -5.972685  | 10.927833 | -8.831332  | -5.039853 |
| 1DV8 | A | LYS | 221 | E | -6.160595  | 10.665952 | -8.577867  | -4.873959 |
| 1DV8 | A | TRP | 222 | E | -8.041643  | 12.361098 | -10.274115 | -4.908271 |
| 1DV8 | A | VAL | 223 | T | -5.718697  | 6.581521  | -9.863531  | -4.663864 |
| 1DV8 | A | ASP | 224 | T | -5.716333  | 6.594012  | -9.877837  | -4.667085 |
| 1DV8 | A | GLY | 225 | T | -5.698544  | 6.671793  | -9.931621  | -4.681384 |
| 1DV8 | A | THR | 226 | C | -5.676117  | 6.773655  | -9.966280  | -4.684490 |
| 1DV8 | A | ASP | 227 | T | -5.562775  | 6.818430  | -10.124828 | -4.724655 |
| 1DV8 | A | TYR | 228 | T | -6.391981  | 7.897366  | -10.949940 | -4.925092 |
| 1DV8 | A | GLU | 229 | T | -6.127457  | 8.372486  | -10.453237 | -4.816334 |
| 1DV8 | A | THR | 230 | T | -6.162078  | 8.329268  | -10.384511 | -4.797018 |
| 1DV8 | A | GLY | 231 | T | -6.214673  | 8.226926  | -10.338304 | -4.799862 |
| 1DV8 | A | PHE | 232 | C | -6.711476  | 9.256266  | -9.701038  | -4.650201 |
| 1DV8 | A | LYS | 233 | C | -6.712693  | 9.249403  | -9.693890  | -4.649241 |
| 1DV8 | A | ASN | 234 | C | -9.271685  | 11.285082 | -13.156911 | -5.353786 |
| 1DV8 | A | TRP | 235 | B | -9.584604  | 12.377190 | -13.098996 | -5.351317 |
| 1DV8 | A | ARG | 236 | T | -7.635069  | 8.612647  | -11.349223 | -4.674219 |
| 1DV8 | A | PRO | 237 | T | -6.469026  | 7.086353  | -10.820591 | -4.603087 |
| 1DV8 | A | GLU | 238 | T | -6.461675  | 7.083344  | -10.863211 | -4.607019 |
| 1DV8 | A | GLN | 239 | T | -6.462328  | 7.076997  | -10.860164 | -4.606010 |
| 1DV8 | A | PRO | 240 | T | -6.464457  | 7.057883  | -10.854238 | -4.603646 |
| 1DV8 | A | ASP | 241 | T | -6.544361  | 6.845192  | -10.839524 | -4.612717 |
| 1DV8 | A | ASP | 242 | C | -7.930046  | 8.647179  | -17.221412 | -8.545623 |
| 1DV8 | A | TRP | 243 | C | -7.066287  | 7.976659  | -13.626284 | -6.322838 |
| 1DV8 | A | TYR | 244 | T | -6.016448  | 7.589067  | -10.517645 | -4.981270 |
| 1DV8 | A | GLY | 245 | T | -3.652825  | 4.750226  | -8.283783  | -4.745644 |
| 1DV8 | A | HIS | 246 | T | -3.138542  | 4.617875  | -8.182141  | -4.747963 |
| 1DV8 | A | GLY | 247 | T | -2.082073  | 3.865830  | -7.284950  | -4.809806 |
| 1DV8 | A | LEU | 248 | C | -2.081552  | 3.868417  | -7.288336  | -4.810326 |
| 1DV8 | A | GLY | 249 | C | -2.082209  | 3.864078  | -7.285167  | -4.810168 |
| 1DV8 | A | GLY | 250 | C | -2.127218  | 3.782345  | -7.179259  | -4.795278 |
| 1DV8 | A | GLY | 251 | C | -2.196293  | 3.671492  | -7.026823  | -4.774996 |
| 1DV8 | A | GLU | 252 | C | -6.146958  | 6.768682  | -11.174660 | -5.224168 |
| 1DV8 | A | ASP | 253 | C | -8.085228  | 6.320708  | -14.394181 | -5.588824 |
| 1DV8 | A | CYS | 254 | E | -9.885312  | 7.043428  | -16.702859 | -5.778857 |
| 1DV8 | A | ALA | 255 | E | -11.338382 | 8.867048  | -16.916475 | -5.309610 |
| 1DV8 | A | HIS | 256 | E | -12.986171 | 13.430296 | -17.514135 | -5.396769 |
| 1DV8 | A | PHE | 257 | E | -11.735797 | 11.205116 | -16.795639 | -5.689464 |
| 1DV8 | A | THR | 258 | T | -10.896610 | 8.988634  | -16.989268 | -5.687174 |
| 1DV8 | A | ASP | 259 | T | -10.887459 | 8.987724  | -17.023590 | -5.691677 |
| 1DV8 | A | ASP | 260 | T | -10.887247 | 8.984216  | -17.028686 | -5.693243 |
| 1DV8 | A | GLY | 261 | T | -10.887309 | 8.984273  | -17.028262 | -5.693329 |
| 1DV8 | A | ARG | 262 | C | -11.033623 | 8.449834  | -17.091584 | -5.683280 |
| 1DV8 | A | TRP | 263 | E | -12.989028 | 11.583357 | -18.221090 | -5.731254 |
| 1DV8 | A | ASN | 264 | E | -13.771050 | 10.765671 | -20.444184 | -5.991644 |
| 1DV8 | A | ASP | 265 | E | -12.627103 | 8.578983  | -18.777908 | -5.302437 |
| 1DV8 | A | ASP | 266 | E | -11.387071 | 10.090312 | -16.159517 | -5.071951 |
| 1DV8 | A | VAL | 267 | T | -9.208261  | 10.060653 | -12.926687 | -4.750384 |
| 1DV8 | A | CYS | 268 | T | -9.192862  | 10.109761 | -12.965015 | -4.752362 |
| 1DV8 | A | GLN | 269 | T | -9.192094  | 10.117005 | -12.966421 | -4.752185 |
| 1DV8 | A | ARG | 270 | T | -9.193693  | 10.121826 | -12.951287 | -4.750907 |
| 1DV8 | A | PRO | 271 | C | -9.206591  | 10.118955 | -12.888553 | -4.744544 |
| 1DV8 | A | TYR | 272 | B | -11.324333 | 12.168134 | -14.474669 | -4.831389 |
| 1DV8 | A | ARG | 273 | E | -12.971105 | 15.032899 | -15.180557 | -4.865328 |
| 1DV8 | A | TRP | 274 | E | -14.469208 | 20.153039 | -14.972963 | -5.187317 |
| 1DV8 | A | VAL | 275 | E | -14.121282 | 16.750592 | -17.425102 | -5.885053 |
| 1DV8 | A | CYS | 276 | E | -12.157450 | 10.348301 | -17.909307 | -6.001432 |
| 1DV8 | A | GLU | 277 | E | -9.706773  | 8.856766  | -14.213291 | -4.916424 |
| 1DV8 | A | THR | 278 | E | -9.706773  | 8.856766  | -14.213291 | -4.916424 |
| 1DV8 | A | GLU | 279 | E | -9.706773  | 8.856766  | -14.213291 | -4.916424 |
| 1DV8 | A | LEU | 280 | C | -9.706773  | 8.856766  | -14.213291 | -4.916424 |
| 1E21 | A | ALA | 7   | H | -10.836289 | 10.309875 | -13.978746 | -4.194534 |

|      |   |     |    |   |            |           |            |           |
|------|---|-----|----|---|------------|-----------|------------|-----------|
| 1E21 | A | PHE | 8  | H | -10.836289 | 10.309875 | -13.978746 | -4.194534 |
| 1E21 | A | GLN | 9  | H | -10.836289 | 10.309875 | -13.978746 | -4.194534 |
| 1E21 | A | ARG | 10 | H | -10.836289 | 10.309875 | -13.978746 | -4.194534 |
| 1E21 | A | GLN | 11 | H | -13.124200 | 11.653016 | -17.841742 | -5.476791 |
| 1E21 | A | HIS | 12 | H | -12.964146 | 9.813369  | -19.066562 | -5.839089 |
| 1E21 | A | MET | 13 | B | -9.771129  | 7.752438  | -15.486128 | -5.439370 |
| 1E21 | A | ASP | 14 | T | -6.588137  | 5.915030  | -11.243009 | -4.578149 |
| 1E21 | A | SER | 15 | T | -5.240783  | 6.817686  | -8.572905  | -4.039071 |
| 1E21 | A | ASP | 16 | T | -4.796556  | 6.819030  | -8.309105  | -3.967982 |
| 1E21 | A | SER | 17 | T | -4.784557  | 6.844024  | -8.336506  | -3.962994 |
| 1E21 | A | SER | 18 | C | -4.773996  | 6.857349  | -8.360522  | -3.955549 |
| 1E21 | A | PRO | 19 | C | -4.801802  | 6.903855  | -8.223880  | -3.925075 |
| 1E21 | A | SER | 20 | T | -5.128049  | 6.874009  | -8.225337  | -3.885976 |
| 1E21 | A | SER | 21 | T | -6.642868  | 7.547669  | -10.094173 | -3.685683 |
| 1E21 | A | SER | 22 | T | -7.008433  | 7.111409  | -10.464956 | -3.661868 |
| 1E21 | A | SER | 23 | T | -7.895220  | 5.433957  | -12.912809 | -4.009532 |
| 1E21 | A | THR | 24 | H | -7.978063  | 5.229801  | -12.994875 | -4.078254 |
| 1E21 | A | TYR | 25 | H | -9.508400  | 9.698670  | -14.500927 | -5.163935 |
| 1E21 | A | CYS | 26 | H | -10.052534 | 10.094059 | -15.431862 | -5.543647 |
| 1E21 | A | ASN | 27 | H | -10.235393 | 10.279001 | -15.263385 | -5.561990 |
| 1E21 | A | GLN | 28 | H | -9.813512  | 10.170323 | -14.482749 | -5.122109 |
| 1E21 | A | MET | 29 | H | -10.140986 | 10.210032 | -14.148059 | -4.836932 |
| 1E21 | A | MET | 30 | H | -10.108129 | 10.121416 | -14.279588 | -4.838356 |
| 1E21 | A | ARG | 31 | H | -10.102680 | 9.955788  | -14.314575 | -4.789687 |
| 1E21 | A | ARG | 32 | H | -10.095324 | 9.977700  | -14.351585 | -4.805878 |
| 1E21 | A | ARG | 33 | H | -11.224562 | 9.454298  | -17.097277 | -5.202933 |
| 1E21 | A | ASN | 34 | T | -9.582824  | 7.687879  | -16.343891 | -6.121002 |
| 1E21 | A | MET | 35 | T | -9.529982  | 7.811484  | -16.339880 | -6.096106 |
| 1E21 | A | THR | 36 | T | -9.096701  | 7.654451  | -15.830144 | -5.798732 |
| 1E21 | A | GLN | 37 | T | -9.063016  | 7.594998  | -15.914895 | -5.784006 |
| 1E21 | A | GLY | 38 | T | -8.491688  | 6.936572  | -14.637543 | -5.101438 |
| 1E21 | A | ARG | 39 | T | -8.468948  | 6.991027  | -14.240038 | -4.822044 |
| 1E21 | A | CYS | 40 | T | -8.476001  | 6.959282  | -14.222340 | -4.811818 |
| 1E21 | A | LYS | 41 | C | -8.581913  | 6.887358  | -14.010970 | -4.672670 |
| 1E21 | A | PRO | 42 | C | -8.595154  | 6.911624  | -13.926603 | -4.651443 |
| 1E21 | A | VAL | 43 | E | -9.384864  | 7.991433  | -14.141531 | -4.569946 |
| 1E21 | A | ASN | 44 | E | -10.517595 | 9.339944  | -16.326075 | -5.473712 |
| 1E21 | A | THR | 45 | E | -10.651106 | 9.622991  | -15.988161 | -5.431496 |
| 1E21 | A | PHE | 46 | E | -11.772647 | 13.101343 | -15.382417 | -5.222819 |
| 1E21 | A | VAL | 47 | E | -12.141046 | 13.890319 | -15.495298 | -5.115118 |
| 1E21 | A | HIS | 48 | C | -10.837961 | 10.991261 | -15.095723 | -5.220617 |
| 1E21 | A | GLU | 49 | C | -8.735737  | 8.243551  | -13.377162 | -4.973658 |
| 1E21 | A | PRO | 50 | C | -8.158981  | 9.155512  | -12.046334 | -4.547500 |
| 1E21 | A | LEU | 51 | H | -8.138057  | 9.215353  | -12.081557 | -4.545539 |
| 1E21 | A | VAL | 52 | H | -8.071765  | 9.336409  | -12.128674 | -4.550776 |
| 1E21 | A | ASP | 53 | H | -8.075143  | 9.334447  | -12.109527 | -4.545656 |
| 1E21 | A | VAL | 54 | H | -8.300372  | 9.891206  | -11.551229 | -4.350815 |
| 1E21 | A | GLN | 55 | H | -9.210036  | 10.588661 | -12.794392 | -4.598121 |
| 1E21 | A | ASN | 56 | H | -9.322061  | 10.463146 | -12.877224 | -4.654794 |
| 1E21 | A | VAL | 57 | G | -10.560184 | 11.064354 | -15.353492 | -5.077104 |
| 1E21 | A | CYS | 58 | G | -10.462834 | 10.417768 | -15.947163 | -5.375998 |
| 1E21 | A | PHE | 59 | G | -10.251014 | 10.348646 | -15.759398 | -5.427421 |
| 1E21 | A | GLN | 60 | C | -8.917889  | 8.838676  | -13.780860 | -5.187762 |
| 1E21 | A | GLU | 61 | E | -5.576301  | 7.572357  | -9.373774  | -4.807985 |
| 1E21 | A | LYS | 62 | E | -5.433267  | 7.388377  | -9.634902  | -4.770506 |
| 1E21 | A | VAL | 63 | E | -5.429891  | 7.372004  | -9.662959  | -4.770142 |
| 1E21 | A | THR | 64 | C | -5.405625  | 7.163786  | -9.860498  | -4.777403 |
| 1E21 | A | CYS | 65 | T | -5.403310  | 7.123777  | -9.894272  | -4.778631 |
| 1E21 | A | LYS | 66 | T | -6.139179  | 5.353236  | -11.894091 | -4.750716 |
| 1E21 | A | ASN | 67 | T | -6.425494  | 2.345899  | -14.721639 | -5.261836 |
| 1E21 | A | GLY | 68 | T | -6.358343  | 2.456876  | -14.745729 | -5.310416 |
| 1E21 | A | GLN | 69 | C | -6.491128  | 2.520930  | -14.786334 | -5.400685 |
| 1E21 | A | GLY | 70 | C | -6.515045  | 2.566801  | -14.710344 | -5.412365 |
| 1E21 | A | ASN | 71 | C | -6.659045  | 2.815854  | -14.541865 | -5.478553 |
| 1E21 | A | CYS | 72 | E | -7.545687  | 3.628973  | -14.876777 | -5.511667 |
| 1E21 | A | TYR | 73 | E | -11.685971 | 10.112352 | -17.893914 | -5.871305 |
| 1E21 | A | LYS | 74 | E | -9.765842  | 9.663303  | -14.828271 | -5.694002 |
| 1E21 | A | SER | 75 | T | -9.388322  | 9.427057  | -14.843193 | -5.604356 |
| 1E21 | A | ASN | 76 | T | -8.747366  | 9.971928  | -13.806782 | -5.555076 |
| 1E21 | A | SER | 77 | T | -8.700370  | 10.190682 | -13.745297 | -5.523636 |
| 1E21 | A | SER | 78 | T | -8.679914  | 10.340204 | -13.723899 | -5.524240 |
| 1E21 | A | MET | 79 | E | -8.781434  | 10.477907 | -13.525514 | -5.493763 |
| 1E21 | A | HIS | 80 | E | -8.889326  | 10.747141 | -13.264324 | -5.492076 |
| 1E21 | A | ILE | 81 | E | -9.972065  | 13.341694 | -13.227149 | -5.294379 |
| 1E21 | A | THR | 82 | E | -10.594334 | 14.253623 | -13.678186 | -5.574502 |
| 1E21 | A | ASP | 83 | E | -11.705801 | 11.942334 | -17.136955 | -5.710613 |
| 1E21 | A | CYS | 84 | E | -8.120652  | 10.212539 | -11.249240 | -4.813174 |
| 1E21 | A | ARG | 85 | E | -4.766405  | 8.681660  | -7.472773  | -4.604861 |
| 1E21 | A | LEU | 86 | E | -3.466850  | 6.786760  | -7.184115  | -4.698981 |
| 1E21 | A | THR | 87 | T | -2.778875  | 4.787958  | -7.200743  | -4.333954 |
| 1E21 | A | ASN | 88 | T | -2.775141  | 4.800118  | -7.216110  | -4.334537 |

|      |   |     |     |   |            |           |            |           |
|------|---|-----|-----|---|------------|-----------|------------|-----------|
| 1E21 | A | GLY | 89  | T | -2.774912  | 4.800115  | -7.217821  | -4.334395 |
| 1E21 | A | SER | 90  | T | -2.795753  | 4.656727  | -7.207002  | -4.321607 |
| 1E21 | A | ARG | 91  | T | -2.995940  | 3.876988  | -7.209180  | -4.143071 |
| 1E21 | A | TYR | 92  | T | -5.466326  | 6.527239  | -10.133567 | -4.392152 |
| 1E21 | A | PRO | 93  | T | -5.975115  | 6.401932  | -10.996690 | -4.457991 |
| 1E21 | A | ASN | 94  | T | -6.044625  | 6.448208  | -10.940924 | -4.501265 |
| 1E21 | A | CYS | 95  | T | -6.143293  | 6.510076  | -10.901625 | -4.592767 |
| 1E21 | A | ALA | 96  | C | -7.212814  | 8.461313  | -14.139194 | -6.737552 |
| 1E21 | A | TYR | 97  | E | -8.895095  | 10.117353 | -13.000666 | -5.241742 |
| 1E21 | A | ARG | 98  | E | -10.422352 | 11.576576 | -15.072770 | -5.349978 |
| 1E21 | A | THR | 99  | E | -9.593064  | 10.779832 | -14.288394 | -5.519178 |
| 1E21 | A | SER | 100 | E | -9.558304  | 10.723778 | -14.375522 | -5.516100 |
| 1E21 | A | PRO | 101 | E | -9.526345  | 10.775432 | -14.424417 | -5.534344 |
| 1E21 | A | LYS | 102 | E | -9.531941  | 10.741892 | -14.445022 | -5.547456 |
| 1E21 | A | GLU | 103 | E | -9.608752  | 10.893393 | -14.361784 | -5.603941 |
| 1E21 | A | ARG | 104 | E | -10.578162 | 12.281596 | -15.378891 | -5.704091 |
| 1E21 | A | HIS | 105 | E | -10.687716 | 14.058075 | -14.049182 | -5.271354 |
| 1E21 | A | ILE | 106 | E | -10.802228 | 15.378742 | -12.540044 | -4.475308 |
| 1E21 | A | ILE | 107 | E | -10.785292 | 15.188737 | -12.359384 | -4.269589 |
| 1E21 | A | VAL | 108 | E | -9.908072  | 11.226583 | -13.079875 | -4.458260 |
| 1E21 | A | ALA | 109 | E | -8.276830  | 7.936968  | -12.326836 | -4.407993 |
| 1E21 | A | CYS | 110 | E | -5.617363  | 5.086727  | -9.922107  | -4.161810 |
| 1E21 | A | GLU | 111 | E | -5.460259  | 5.671076  | -9.814807  | -4.159714 |
| 1E21 | A | GLY | 112 | T | -5.262703  | 6.072144  | -9.569613  | -4.071569 |
| 1E21 | A | SER | 113 | T | -5.261074  | 6.085417  | -9.569754  | -4.069804 |
| 1E21 | A | PRO | 114 | T | -5.264366  | 6.077413  | -9.554460  | -4.067778 |
| 1E21 | A | TYR | 115 | T | -5.730917  | 7.301770  | -9.145634  | -3.957961 |
| 1E21 | A | VAL | 116 | E | -6.002309  | 7.134875  | -8.962731  | -3.844853 |
| 1E21 | A | PRO | 117 | E | -8.607789  | 11.261564 | -10.157015 | -3.596236 |
| 1E21 | A | VAL | 118 | E | -9.811020  | 14.014070 | -11.204783 | -3.943724 |
| 1E21 | A | HIS | 119 | E | -10.203922 | 15.520206 | -11.084555 | -4.179428 |
| 1E21 | A | PHE | 120 | E | -10.171179 | 15.549243 | -11.409516 | -4.489009 |
| 1E21 | A | ASP | 121 | E | -8.345418  | 9.388258  | -12.206559 | -4.933933 |
| 1E21 | A | ALA | 122 | E | -5.245665  | 7.442609  | -7.460487  | -3.583916 |
| 1E21 | A | SER | 123 | E | -5.245665  | 7.442609  | -7.460487  | -3.583916 |
| 1E21 | A | VAL | 124 | E | -5.245665  | 7.442609  | -7.460487  | -3.583916 |
| 1E21 | A | GLU | 125 | C | -5.245665  | 7.442609  | -7.460487  | -3.583916 |
| 1E87 | A | SER | 83  | T | -5.427984  | 3.583447  | -11.868958 | -4.681266 |
| 1E87 | A | SER | 84  | T | -5.427984  | 3.583447  | -11.868958 | -4.681266 |
| 1E87 | A | CYS | 85  | T | -5.427984  | 3.583447  | -11.868958 | -4.681266 |
| 1E87 | A | SER | 86  | T | -5.427984  | 3.583447  | -11.868958 | -4.681266 |
| 1E87 | A | GLU | 87  | T | -4.620155  | 8.369559  | -8.244406  | -4.808143 |
| 1E87 | A | ASP | 88  | T | -4.645249  | 8.606345  | -8.081534  | -4.840110 |
| 1E87 | A | TRP | 89  | T | -4.761952  | 9.777182  | -7.268510  | -4.835604 |
| 1E87 | A | VAL | 90  | E | -4.772151  | 9.798516  | -7.177693  | -4.813843 |
| 1E87 | A | GLY | 91  | E | -4.772867  | 9.798555  | -7.168686  | -4.811552 |
| 1E87 | A | TYR | 92  | E | -8.678480  | 14.186010 | -11.130663 | -5.417521 |
| 1E87 | A | GLN | 93  | T | -9.796716  | 11.667950 | -13.886148 | -5.339345 |
| 1E87 | A | ARG | 94  | T | -9.849367  | 11.268630 | -13.907040 | -5.289142 |
| 1E87 | A | LYS | 95  | E | -10.808937 | 12.632343 | -14.926882 | -5.941941 |
| 1E87 | A | CYS | 96  | E | -13.426745 | 13.332922 | -18.489279 | -6.129051 |
| 1E87 | A | TYR | 97  | E | -12.273382 | 14.689533 | -14.457952 | -4.919181 |
| 1E87 | A | PHE | 98  | E | -8.203737  | 9.306552  | -11.022950 | -4.165200 |
| 1E87 | A | ILE | 99  | E | -5.561106  | 9.052356  | -8.096986  | -4.425407 |
| 1E87 | A | SER | 100 | C | -5.496752  | 9.105767  | -8.285477  | -4.465423 |
| 1E87 | A | THR | 101 | C | -5.479767  | 9.125344  | -8.357671  | -4.476701 |
| 1E87 | A | VAL | 102 | C | -5.479765  | 9.125365  | -8.357695  | -4.476712 |
| 1E87 | A | LYS | 103 | C | -5.485760  | 9.123565  | -8.330614  | -4.479880 |
| 1E87 | A | ARG | 104 | B | -6.696490  | 9.620412  | -10.128349 | -4.824619 |
| 1E87 | A | SER | 105 | C | -7.592354  | 9.800089  | -10.842168 | -4.864151 |
| 1E87 | A | TRP | 106 | H | -11.832041 | 13.997291 | -15.632687 | -5.538949 |
| 1E87 | A | THR | 107 | H | -11.394978 | 8.506459  | -17.585936 | -5.415227 |
| 1E87 | A | SER | 108 | H | -11.331374 | 8.524472  | -17.672662 | -5.413448 |
| 1E87 | A | ALA | 109 | H | -11.196913 | 8.647097  | -17.718578 | -5.437262 |
| 1E87 | A | GLN | 110 | H | -11.188613 | 8.097393  | -18.053879 | -5.459561 |
| 1E87 | A | ASN | 111 | H | -8.576767  | 5.683532  | -13.908006 | -4.532303 |
| 1E87 | A | ALA | 112 | H | -8.260298  | 6.020092  | -13.723744 | -4.471810 |
| 1E87 | A | CYS | 113 | H | -7.151634  | 4.832429  | -13.073380 | -4.669491 |
| 1E87 | A | SER | 114 | H | -5.845552  | 5.968087  | -10.249480 | -4.344963 |
| 1E87 | A | GLU | 115 | H | -5.741978  | 6.185819  | -10.351116 | -4.394793 |
| 1E87 | A | HIS | 116 | H | -5.745064  | 6.203794  | -10.328411 | -4.395129 |
| 1E87 | A | GLY | 117 | C | -5.745288  | 6.225686  | -10.316173 | -4.395349 |
| 1E87 | A | ALA | 118 | C | -5.793861  | 6.364069  | -10.090572 | -4.368756 |
| 1E87 | A | THR | 119 | E | -6.794460  | 7.495333  | -10.934575 | -4.651061 |
| 1E87 | A | LEU | 120 | E | -8.538243  | 10.601903 | -11.877187 | -4.574928 |
| 1E87 | A | ALA | 121 | C | -8.784655  | 10.611634 | -11.603396 | -4.434409 |
| 1E87 | A | VAL | 122 | C | -10.520192 | 13.910536 | -12.961830 | -4.442282 |
| 1E87 | A | ILE | 123 | C | -10.671461 | 13.559355 | -13.625213 | -4.668661 |
| 1E87 | A | ASP | 124 | C | -11.027924 | 12.103015 | -15.158723 | -4.915606 |
| 1E87 | A | SER | 125 | C | -11.314854 | 10.202711 | -16.782471 | -5.168121 |
| 1E87 | A | GLU | 126 | H | -11.379510 | 9.489544  | -17.822961 | -5.619659 |

|      |   |     |     |   |            |           |            |           |
|------|---|-----|-----|---|------------|-----------|------------|-----------|
| 1E87 | A | LYS | 127 | H | -11.492556 | 9.192994  | -18.047180 | -5.726904 |
| 1E87 | A | ASP | 128 | H | -12.052354 | 9.426052  | -19.020498 | -6.146181 |
| 1E87 | A | MET | 129 | H | -12.115204 | 9.974452  | -18.681936 | -6.167223 |
| 1E87 | A | ASN | 130 | H | -11.919301 | 11.907393 | -16.912752 | -5.647964 |
| 1E87 | A | PHE | 131 | H | -12.430155 | 15.508930 | -14.349926 | -4.812660 |
| 1E87 | A | LEU | 132 | H | -12.316788 | 15.883567 | -14.195609 | -4.751539 |
| 1E87 | A | LYS | 133 | H | -11.168183 | 13.767607 | -13.653037 | -4.763725 |
| 1E87 | A | ARG | 134 | H | -10.423585 | 11.725467 | -13.248893 | -4.249668 |
| 1E87 | A | TYR | 135 | H | -9.853938  | 11.747257 | -12.979196 | -4.533068 |
| 1E87 | A | ALA | 136 | H | -7.778019  | 8.659911  | -11.644179 | -4.743471 |
| 1E87 | A | GLY | 137 | T | -7.739174  | 8.740021  | -11.766470 | -4.775888 |
| 1E87 | A | ARG | 138 | T | -7.740307  | 8.733003  | -11.763324 | -4.776369 |
| 1E87 | A | GLU | 139 | T | -7.744858  | 8.716775  | -11.753156 | -4.782111 |
| 1E87 | A | GLU | 140 | C | -7.755353  | 8.663178  | -11.734082 | -4.783619 |
| 1E87 | A | HIS | 141 | E | -9.356218  | 10.124691 | -13.564976 | -5.251744 |
| 1E87 | A | TRP | 142 | E | -11.488654 | 17.254527 | -13.367674 | -5.197074 |
| 1E87 | A | VAL | 143 | E | -11.541685 | 17.604096 | -14.287074 | -5.852150 |
| 1E87 | A | GLY | 144 | E | -10.845929 | 14.947360 | -14.707317 | -6.020545 |
| 1E87 | A | LEU | 145 | E | -10.243670 | 13.918857 | -14.531620 | -6.036592 |
| 1E87 | A | LYS | 146 | E | -7.268391  | 7.800921  | -12.504495 | -5.638399 |
| 1E87 | A | LYS | 147 | E | -3.866899  | 6.154312  | -8.071965  | -4.934101 |
| 1E87 | A | GLU | 148 | T | -2.760249  | 3.775898  | -7.385131  | -4.263886 |
| 1E87 | A | PRO | 149 | T | -2.748151  | 3.888005  | -7.387030  | -4.269221 |
| 1E87 | A | GLY | 150 | T | -2.747640  | 3.893801  | -7.388921  | -4.269702 |
| 1E87 | A | HIS | 151 | T | -2.747932  | 3.891862  | -7.386341  | -4.268990 |
| 1E87 | A | PRO | 152 | C | -2.846511  | 3.473033  | -7.243485  | -4.136816 |
| 1E87 | A | TRP | 153 | E | -5.046030  | 9.304882  | -7.427486  | -4.460240 |
| 1E87 | A | LYS | 154 | E | -6.937122  | 10.549807 | -9.464052  | -4.750121 |
| 1E87 | A | TRP | 155 | E | -9.907806  | 11.397845 | -14.680561 | -5.743750 |
| 1E87 | A | SER | 156 | T | -6.678249  | 5.858374  | -12.553284 | -5.481476 |
| 1E87 | A | ASN | 157 | T | -6.541143  | 6.735212  | -12.249704 | -5.441936 |
| 1E87 | A | GLY | 158 | T | -6.500878  | 6.908511  | -12.254044 | -5.431783 |
| 1E87 | A | LYS | 159 | C | -6.471285  | 7.016606  | -12.249857 | -5.410904 |
| 1E87 | A | GLU | 160 | B | -6.444825  | 7.218167  | -12.179893 | -5.386439 |
| 1E87 | A | PHE | 161 | C | -7.102170  | 10.067599 | -11.435779 | -5.194371 |
| 1E87 | A | ASN | 162 | C | -7.478665  | 10.305544 | -11.780502 | -5.094679 |
| 1E87 | A | ASN | 163 | T | -7.702038  | 10.969732 | -11.468705 | -4.990516 |
| 1E87 | A | TRP | 164 | T | -7.953422  | 12.291129 | -10.955552 | -4.944145 |
| 1E87 | A | PHE | 165 | T | -5.830264  | 10.001890 | -8.034793  | -4.490426 |
| 1E87 | A | ASN | 166 | T | -4.736373  | 5.308099  | -8.958400  | -4.160606 |
| 1E87 | A | VAL | 167 | C | -4.732840  | 5.303779  | -8.983217  | -4.163443 |
| 1E87 | A | THR | 168 | B | -4.728025  | 5.295321  | -9.024980  | -4.172066 |
| 1E87 | A | GLY | 169 | C | -4.723306  | 5.296381  | -9.062640  | -4.182236 |
| 1E87 | A | SER | 170 | C | -4.821409  | 4.455375  | -9.253958  | -4.127461 |
| 1E87 | A | ASP | 171 | C | -6.943033  | 5.393924  | -13.543700 | -5.138442 |
| 1E87 | A | LYS | 172 | C | -7.150283  | 5.208910  | -13.837414 | -5.313491 |
| 1E87 | A | CYS | 173 | E | -7.559175  | 5.807840  | -13.650940 | -5.411054 |
| 1E87 | A | VAL | 174 | E | -10.294491 | 9.719397  | -14.592486 | -4.895141 |
| 1E87 | A | PHE | 175 | E | -10.710845 | 15.340706 | -13.017494 | -5.448870 |
| 1E87 | A | LEU | 176 | E | -8.164933  | 11.521518 | -11.573643 | -5.522690 |
| 1E87 | A | LYS | 177 | E | -6.913606  | 10.628045 | -10.537531 | -5.420136 |
| 1E87 | A | ASN | 178 | T | -6.831178  | 10.481954 | -10.747189 | -5.403436 |
| 1E87 | A | THR | 179 | T | -6.827361  | 10.477590 | -10.768231 | -5.401649 |
| 1E87 | A | GLU | 180 | E | -6.827986  | 10.472127 | -10.766597 | -5.401593 |
| 1E87 | A | VAL | 181 | E | -6.892123  | 10.358708 | -10.679108 | -5.387532 |
| 1E87 | A | SER | 182 | E | -8.003099  | 9.544402  | -12.289132 | -5.288408 |
| 1E87 | A | SER | 183 | E | -8.393367  | 8.443133  | -13.812188 | -5.525724 |
| 1E87 | A | MET | 184 | E | -6.369628  | 7.680580  | -10.971911 | -5.241004 |
| 1E87 | A | GLU | 185 | T | -5.742841  | 7.120728  | -11.020958 | -5.350226 |
| 1E87 | A | CYS | 186 | T | -5.653943  | 7.375340  | -10.985521 | -5.334176 |
| 1E87 | A | GLU | 187 | T | -5.649122  | 7.427286  | -10.982740 | -5.335324 |
| 1E87 | A | LYS | 188 | T | -5.654230  | 7.420525  | -10.958907 | -5.333345 |
| 1E87 | A | ASN | 189 | C | -5.857193  | 7.321883  | -10.988625 | -5.374936 |
| 1E87 | A | LEU | 190 | B | -6.787007  | 9.218701  | -10.766400 | -5.248386 |
| 1E87 | A | TYR | 191 | E | -8.491709  | 13.729933 | -10.737072 | -5.481181 |
| 1E87 | A | TRP | 192 | E | -12.379194 | 19.970975 | -13.777704 | -5.983638 |
| 1E87 | A | ILE | 193 | E | -13.074260 | 21.724957 | -13.608985 | -5.886616 |
| 1E87 | A | CYS | 194 | E | -13.316811 | 17.405307 | -16.891551 | -6.346266 |
| 1E87 | A | ASN | 195 | E | -11.430905 | 11.888988 | -15.919021 | -5.748264 |
| 1E87 | A | LYS | 196 | E | -8.466050  | 9.937029  | -11.181377 | -4.290160 |
| 1E87 | A | PRO | 197 | E | -8.466050  | 9.937029  | -11.181377 | -4.290160 |
| 1E87 | A | TYR | 198 | C | -8.466050  | 9.937029  | -11.181377 | -4.290160 |
| 1E87 | A | LYS | 199 | C | -8.466050  | 9.937029  | -11.181377 | -4.290160 |
| 1E87 | A | SER | 190 | C | -3.746533  | 5.238372  | -5.551265  | -2.692166 |
| 1E87 | A | ALA | 191 | C | -3.746533  | 5.238372  | -5.551265  | -2.692166 |
| 1E87 | A | VAL | 192 | E | -3.746533  | 5.238372  | -5.551265  | -2.692166 |
| 1E87 | A | ILE | 193 | E | -3.746533  | 5.238372  | -5.551265  | -2.692166 |
| 1E87 | A | LYS | 194 | E | -6.199465  | 8.589348  | -9.944019  | -4.560136 |
| 1E87 | A | ALA | 195 | E | -6.746556  | 9.752077  | -10.499722 | -5.119934 |
| 1E87 | A | GLY | 196 | E | -7.652303  | 10.134660 | -12.151168 | -5.918491 |
| 1E87 | A | TYR | 197 | E | -10.351415 | 11.833569 | -14.666002 | -5.477827 |

|      |   |     |     |   |            |           |            |           |
|------|---|-----|-----|---|------------|-----------|------------|-----------|
| 1EAZ | A | CYS | 198 | E | -10.387039 | 11.576161 | -14.558146 | -5.344727 |
| 1EAZ | A | VAL | 199 | E | -10.493567 | 11.491566 | -14.365690 | -5.248721 |
| 1EAZ | A | LYS | 200 | E | -9.998189  | 9.085200  | -16.100537 | -6.076304 |
| 1EAZ | A | GLN | 201 | E | -7.012727  | 5.112442  | -12.819790 | -5.053068 |
| 1EAZ | A | GLY | 202 | T | -3.193683  | 1.810695  | -8.399402  | -4.093831 |
| 1EAZ | A | ALA | 203 | T | -2.659530  | 2.040823  | -8.042703  | -4.025950 |
| 1EAZ | A | VAL | 204 | T | -2.657461  | 2.060840  | -8.049479  | -4.028953 |
| 1EAZ | A | MET | 205 | T | -2.657447  | 2.061040  | -8.049591  | -4.028986 |
| 1EAZ | A | LYS | 206 | T | -2.657833  | 2.059043  | -8.046380  | -4.028265 |
| 1EAZ | A | ASN | 207 | C | -2.969983  | 2.214612  | -7.735289  | -3.947544 |
| 1EAZ | A | TRP | 208 | E | -6.018681  | 7.760197  | -9.836508  | -4.803894 |
| 1EAZ | A | LYS | 209 | E | -8.853148  | 10.299426 | -13.192841 | -5.492657 |
| 1EAZ | A | ARG | 210 | E | -10.740872 | 14.290605 | -16.377287 | -7.081824 |
| 1EAZ | A | ARG | 211 | E | -11.263024 | 15.743235 | -16.272917 | -7.432818 |
| 1EAZ | A | TYR | 212 | E | -14.475010 | 21.951695 | -15.770168 | -6.107614 |
| 1EAZ | A | PHE | 213 | E | -14.150638 | 18.623080 | -16.126684 | -5.602295 |
| 1EAZ | A | GLN | 214 | E | -12.018674 | 12.162078 | -17.416262 | -6.141632 |
| 1EAZ | A | LEU | 215 | E | -9.694056  | 10.682523 | -13.703660 | -5.273344 |
| 1EAZ | A | ASP | 216 | E | -9.311489  | 11.047327 | -13.447068 | -5.236250 |
| 1EAZ | A | GLU | 217 | T | -9.024116  | 10.950601 | -13.372280 | -5.200730 |
| 1EAZ | A | ASN | 218 | T | -9.020210  | 10.980297 | -13.378761 | -5.203110 |
| 1EAZ | A | THR | 219 | E | -9.023509  | 10.979598 | -13.353598 | -5.197286 |
| 1EAZ | A | ILE | 220 | E | -9.248495  | 11.132279 | -13.226905 | -5.170355 |
| 1EAZ | A | GLY | 221 | E | -9.579075  | 10.896259 | -13.274715 | -5.151931 |
| 1EAZ | A | TYR | 222 | E | -11.905221 | 16.009544 | -14.492373 | -5.610303 |
| 1EAZ | A | PHE | 223 | E | -10.546888 | 13.402282 | -17.235281 | -7.974378 |
| 1EAZ | A | LYS | 224 | T | -8.161696  | 6.040730  | -13.829881 | -5.006854 |
| 1EAZ | A | SER | 225 | T | -6.825221  | 4.879818  | -12.482289 | -4.693396 |
| 1EAZ | A | GLU | 226 | T | -4.663923  | 4.282877  | -9.738738  | -4.619512 |
| 1EAZ | A | LEU | 227 | T | -4.363919  | 4.868483  | -9.273925  | -4.422829 |
| 1EAZ | A | GLU | 228 | T | -4.318220  | 5.115485  | -9.227504  | -4.408388 |
| 1EAZ | A | LYS | 229 | C | -4.240584  | 5.639316  | -8.942953  | -4.332291 |
| 1EAZ | A | GLU | 230 | C | -4.207485  | 5.959302  | -8.772555  | -4.295288 |
| 1EAZ | A | PRO | 231 | T | -4.545555  | 7.535323  | -7.973901  | -4.018961 |
| 1EAZ | A | LEU | 232 | T | -4.993032  | 9.709349  | -7.276221  | -3.897839 |
| 1EAZ | A | ARG | 233 | E | -5.148459  | 10.173845 | -6.865959  | -3.799251 |
| 1EAZ | A | VAL | 234 | E | -5.649363  | 11.323628 | -6.738431  | -3.807175 |
| 1EAZ | A | ILE | 235 | E | -6.426215  | 13.919855 | -6.476749  | -3.812526 |
| 1EAZ | A | PRO | 236 | E | -6.670667  | 13.163004 | -7.699589  | -4.091619 |
| 1EAZ | A | LEU | 237 | G | -6.843381  | 12.676335 | -8.258927  | -4.233678 |
| 1EAZ | A | LYS | 238 | G | -6.707501  | 11.936021 | -8.808910  | -4.341955 |
| 1EAZ | A | GLU | 239 | G | -6.662423  | 11.882121 | -8.859706  | -4.346278 |
| 1EAZ | A | VAL | 240 | E | -6.683070  | 11.839793 | -8.865564  | -4.351266 |
| 1EAZ | A | HIS | 241 | E | -7.136652  | 11.102154 | -10.181962 | -4.580962 |
| 1EAZ | A | LYS | 242 | E | -7.267292  | 10.752601 | -10.328783 | -4.586109 |
| 1EAZ | A | VAL | 243 | E | -7.705276  | 12.111889 | -10.152160 | -4.568516 |
| 1EAZ | A | GLN | 244 | E | -8.297460  | 11.125861 | -12.429592 | -5.140343 |
| 1EAZ | A | GLU | 245 | E | -8.551278  | 10.550575 | -13.748272 | -5.652469 |
| 1EAZ | A | CYS | 246 | T | -8.509470  | 8.899825  | -14.516216 | -5.615328 |
| 1EAZ | A | LYS | 247 | T | -7.848432  | 5.621009  | -14.149515 | -4.866045 |
| 1EAZ | A | GLN | 248 | T | -7.897256  | 4.846177  | -14.381472 | -4.748366 |
| 1EAZ | A | SER | 249 | T | -7.304331  | 4.685330  | -13.376587 | -4.498669 |
| 1EAZ | A | ASP | 250 | G | -6.974905  | 5.346662  | -12.823702 | -4.521661 |
| 1EAZ | A | ILE | 251 | G | -6.962078  | 5.390999  | -12.816341 | -4.518255 |
| 1EAZ | A | MET | 252 | G | -7.059885  | 5.612674  | -12.614096 | -4.518950 |
| 1EAZ | A | MET | 253 | C | -7.067614  | 5.618271  | -12.575817 | -4.515067 |
| 1EAZ | A | ARG | 254 | T | -7.407362  | 6.332973  | -12.341327 | -4.602911 |
| 1EAZ | A | ASP | 255 | T | -8.776862  | 6.875126  | -14.154262 | -4.878074 |
| 1EAZ | A | ASN | 256 | T | -10.352697 | 8.246470  | -16.695537 | -5.524075 |
| 1EAZ | A | LEU | 257 | E | -10.786523 | 9.080697  | -16.216902 | -5.399403 |
| 1EAZ | A | PHE | 258 | E | -12.509426 | 16.763902 | -15.616272 | -5.744807 |
| 1EAZ | A | GLU | 259 | E | -11.130833 | 13.992575 | -13.706148 | -5.098165 |
| 1EAZ | A | ILE | 260 | E | -7.948436  | 10.928747 | -9.670284  | -4.061198 |
| 1EAZ | A | VAL | 261 | E | -7.904916  | 10.793885 | -9.921725  | -4.094351 |
| 1EAZ | A | THR | 262 | E | -7.225088  | 9.610993  | -10.613952 | -4.538467 |
| 1EAZ | A | THR | 263 | T | -7.223236  | 9.616943  | -10.624545 | -4.539792 |
| 1EAZ | A | SER | 264 | T | -7.223981  | 9.611782  | -10.620867 | -4.539154 |
| 1EAZ | A | ARG | 265 | E | -7.429485  | 9.071462  | -11.022424 | -4.739211 |
| 1EAZ | A | THR | 266 | E | -7.448570  | 9.073504  | -10.950506 | -4.746148 |
| 1EAZ | A | PHE | 267 | E | -10.622498 | 11.736545 | -14.035872 | -4.985086 |
| 1EAZ | A | TYR | 268 | E | -12.434081 | 16.461283 | -15.516210 | -5.596772 |
| 1EAZ | A | VAL | 269 | E | -10.626216 | 10.099057 | -14.865851 | -4.968699 |
| 1EAZ | A | GLN | 270 | E | -10.432716 | 9.197115  | -15.527525 | -4.999818 |
| 1EAZ | A | ALA | 271 | C | -8.263392  | 5.219460  | -13.667637 | -4.449411 |
| 1EAZ | A | ASP | 272 | C | -7.809274  | 4.867813  | -14.037256 | -4.671764 |
| 1EAZ | A | SER | 273 | C | -7.806237  | 4.884745  | -14.050396 | -4.675602 |
| 1EAZ | A | PRO | 274 | H | -7.798615  | 4.926268  | -14.071331 | -4.690141 |
| 1EAZ | A | GLU | 275 | H | -7.799716  | 4.925927  | -14.065715 | -4.690305 |
| 1EAZ | A | GLU | 276 | H | -8.149162  | 4.771920  | -14.424961 | -4.895315 |
| 1EAZ | A | MET | 277 | H | -9.924837  | 8.764044  | -15.699899 | -5.477289 |
| 1EAZ | A | HIS | 278 | H | -10.012924 | 9.083015  | -15.427169 | -5.444703 |



|      |   |     |     |   |            |           |            |           |
|------|---|-----|-----|---|------------|-----------|------------|-----------|
| 1EAZ | A | SER | 279 | H | -11.079444 | 11.683657 | -15.444338 | -5.049760 |
| 1EAZ | A | TRP | 280 | H | -11.118647 | 13.924169 | -13.586949 | -4.481611 |
| 1EAZ | A | ILE | 281 | H | -9.956347  | 11.089613 | -11.864282 | -3.497536 |
| 1EAZ | A | LYS | 282 | H | -8.766458  | 8.282576  | -11.937254 | -3.638257 |
| 1EAZ | A | ALA | 283 | H | -8.708980  | 8.486459  | -11.950056 | -3.642909 |
| 1EAZ | A | VAL | 284 | H | -8.677567  | 8.634279  | -12.017984 | -3.681242 |
| 1EAZ | A | SER | 285 | H | -8.601400  | 8.626036  | -12.455764 | -3.953965 |
| 1EAZ | A | GLY | 286 | H | -8.090116  | 8.226558  | -12.832595 | -4.672514 |
| 1EAZ | A | ALA | 287 | H | -7.880938  | 8.433806  | -12.362639 | -4.613596 |
| 1EAZ | A | ILE | 288 | H | -6.828437  | 6.512940  | -10.534604 | -3.688639 |
| 1EAZ | A | VAL | 289 | H | -5.948508  | 4.634896  | -9.670745  | -3.099316 |
| 1EAZ | A | ALA | 290 | H | -5.948508  | 4.634896  | -9.670745  | -3.099316 |
| 1EAZ | A | GLN | 291 | H | -5.948508  | 4.634896  | -9.670745  | -3.099316 |
| 1EAZ | A | ARG | 292 | C | -5.948508  | 4.634896  | -9.670745  | -3.099316 |
| 1ESR | A | PRO | 2   | T | -1.260548  | 1.763084  | -8.070143  | -4.740687 |
| 1ESR | A | ASP | 3   | T | -1.260548  | 1.763084  | -8.070143  | -4.740687 |
| 1ESR | A | SER | 4   | T | -1.260548  | 1.763084  | -8.070143  | -4.740687 |
| 1ESR | A | VAL | 5   | T | -1.260548  | 1.763084  | -8.070143  | -4.740687 |
| 1ESR | A | SER | 6   | T | -1.294114  | 1.890081  | -8.099896  | -4.841106 |
| 1ESR | A | ILE | 7   | T | -1.286829  | 2.132359  | -8.042130  | -4.877643 |
| 1ESR | A | PRO | 8   | C | -1.354133  | 2.249293  | -8.046224  | -4.989884 |
| 1ESR | A | ILE | 9   | C | -1.564295  | 2.990233  | -8.062693  | -5.282393 |
| 1ESR | A | THR | 10  | C | -1.762284  | 3.362821  | -8.039802  | -5.430938 |
| 1ESR | A | CYS | 11  | C | -2.496724  | 4.990119  | -8.675539  | -5.918483 |
| 1ESR | A | CYS | 12  | T | -4.615738  | 6.277408  | -11.492532 | -6.385744 |
| 1ESR | A | PHE | 13  | T | -5.225794  | 8.621624  | -9.435864  | -5.023172 |
| 1ESR | A | ASN | 14  | T | -4.950316  | 8.321986  | -7.982103  | -4.125474 |
| 1ESR | A | VAL | 15  | T | -4.519583  | 8.543383  | -6.019507  | -3.337082 |
| 1ESR | A | ILE | 16  | C | -4.310820  | 8.994063  | -5.594619  | -3.261256 |
| 1ESR | A | ASN | 17  | C | -4.079890  | 8.978807  | -5.498125  | -3.284510 |
| 1ESR | A | ARG | 18  | C | -4.100674  | 9.028206  | -5.409563  | -3.246291 |
| 1ESR | A | LYS | 19  | C | -4.161301  | 9.180413  | -5.281580  | -3.249963 |
| 1ESR | A | ILE | 20  | C | -4.400681  | 9.506873  | -5.270903  | -3.316562 |
| 1ESR | A | PRO | 21  | C | -4.675223  | 9.208332  | -5.401747  | -3.336581 |
| 1ESR | A | ILE | 22  | G | -5.968121  | 11.247953 | -6.019937  | -3.322402 |
| 1ESR | A | GLN | 23  | G | -7.027361  | 11.011346 | -8.212241  | -4.021479 |
| 1ESR | A | ARG | 24  | G | -8.924211  | 11.733156 | -11.346538 | -4.427998 |
| 1ESR | A | LEU | 25  | E | -9.301776  | 12.456215 | -11.457581 | -4.585140 |
| 1ESR | A | GLU | 26  | E | -9.684665  | 11.707196 | -12.692711 | -4.677244 |
| 1ESR | A | SER | 27  | E | -9.767588  | 11.345666 | -12.819092 | -4.634990 |
| 1ESR | A | TYR | 28  | E | -8.069517  | 11.265553 | -9.217729  | -3.813825 |
| 1ESR | A | THR | 29  | E | -6.919801  | 8.095125  | -9.497151  | -3.777254 |
| 1ESR | A | ARG | 30  | E | -5.557517  | 6.897416  | -8.119362  | -3.617882 |
| 1ESR | A | ILE | 31  | E | -3.860050  | 6.072742  | -6.956269  | -4.033508 |
| 1ESR | A | THR | 32  | C | -2.762751  | 5.125467  | -7.861389  | -5.095172 |
| 1ESR | A | ASN | 33  | T | -2.731245  | 5.143323  | -7.864708  | -5.044124 |
| 1ESR | A | ILE | 34  | T | -2.728709  | 5.143798  | -7.870977  | -5.039466 |
| 1ESR | A | GLN | 35  | T | -2.732364  | 5.134104  | -7.872941  | -5.049284 |
| 1ESR | A | CYS | 36  | T | -2.822950  | 4.978046  | -8.018648  | -5.199884 |
| 1ESR | A | PRO | 37  | C | -4.406674  | 5.581293  | -8.020335  | -4.032901 |
| 1ESR | A | LYS | 38  | C | -5.577412  | 6.780601  | -9.497954  | -4.148763 |
| 1ESR | A | GLU | 39  | C | -6.122848  | 8.701209  | -9.899249  | -4.612121 |
| 1ESR | A | ALA | 40  | E | -6.512361  | 9.947657  | -9.666479  | -4.670540 |
| 1ESR | A | VAL | 41  | E | -7.204721  | 11.445224 | -8.049591  | -3.834914 |
| 1ESR | A | ILE | 42  | E | -10.128110 | 13.212813 | -10.938016 | -3.902781 |
| 1ESR | A | PHE | 43  | E | -11.750610 | 16.788588 | -11.488991 | -3.990627 |
| 1ESR | A | LYS | 44  | E | -10.107247 | 8.042935  | -15.686377 | -5.635843 |
| 1ESR | A | THR | 45  | E | -9.301247  | 7.570495  | -15.031983 | -5.445572 |
| 1ESR | A | GLN | 46  | T | -8.484937  | 7.296835  | -14.528633 | -5.629945 |
| 1ESR | A | ARG | 47  | T | -7.976495  | 8.173850  | -13.103117 | -5.239303 |
| 1ESR | A | GLY | 48  | T | -7.396979  | 8.129760  | -11.913594 | -4.879158 |
| 1ESR | A | LYS | 49  | C | -7.367113  | 8.229321  | -11.853770 | -4.832607 |
| 1ESR | A | GLU | 50  | E | -7.378422  | 8.285786  | -11.771751 | -4.812928 |
| 1ESR | A | VAL | 51  | E | -7.448218  | 8.444619  | -11.437044 | -4.694469 |
| 1ESR | A | CYS | 52  | E | -7.603585  | 8.333523  | -11.264127 | -4.611260 |
| 1ESR | A | ALA | 53  | E | -8.846639  | 10.013344 | -11.899528 | -4.216678 |
| 1ESR | A | ASP | 54  | T | -9.569585  | 10.458469 | -12.964673 | -4.227488 |
| 1ESR | A | PRO | 55  | T | -9.863288  | 9.716472  | -13.455944 | -4.094516 |
| 1ESR | A | LYS | 56  | T | -10.066544 | 8.777337  | -14.033163 | -4.147104 |
| 1ESR | A | GLU | 57  | T | -10.429258 | 8.585010  | -14.279854 | -4.176921 |
| 1ESR | A | ARG | 58  | H | -11.434697 | 8.325199  | -16.131470 | -4.394681 |
| 1ESR | A | TRP | 59  | H | -12.457535 | 11.743974 | -16.171433 | -4.449136 |
| 1ESR | A | VAL | 60  | H | -12.566389 | 11.665136 | -16.161954 | -4.383408 |
| 1ESR | A | ARG | 61  | H | -12.805598 | 11.527401 | -16.179903 | -4.219442 |
| 1ESR | A | ASP | 62  | H | -12.105983 | 10.880400 | -16.579990 | -5.045495 |
| 1ESR | A | SER | 63  | H | -12.168636 | 11.008333 | -16.866447 | -5.313933 |
| 1ESR | A | MET | 64  | H | -12.095935 | 11.151845 | -17.075611 | -5.420219 |
| 1ESR | A | LYS | 65  | H | -11.375683 | 10.354776 | -19.374102 | -7.491370 |
| 1ESR | A | HIS | 66  | H | -10.491763 | 10.152675 | -18.901002 | -7.964652 |
| 1ESR | A | LEU | 67  | H | -9.920431  | 9.462345  | -18.282158 | -7.779801 |
| 1ESR | A | ASP | 68  | H | -8.438296  | 6.026153  | -16.397535 | -6.841840 |

|      |   |     |     |   |            |           |            |           |
|------|---|-----|-----|---|------------|-----------|------------|-----------|
| 1ESR | A | GLN | 69  | H | -6.787676  | 5.309827  | -13.330312 | -5.895388 |
| 1ESR | A | ILE | 70  | H | -5.796464  | 4.802912  | -11.312277 | -4.963238 |
| 1ESR | A | PHE | 71  | H | -5.245710  | 4.162786  | -10.777564 | -4.586982 |
| 1ESR | A | GLN | 72  | H | -4.377589  | 3.593305  | -8.801649  | -3.774538 |
| 1ESR | A | ASN | 73  | H | -3.224551  | 2.390909  | -6.260452  | -2.633658 |
| 1ESR | A | LEU | 74  | C | -3.224551  | 2.390909  | -6.260452  | -2.633658 |
| 1ESR | A | LYS | 75  | C | -3.224551  | 2.390909  | -6.260452  | -2.633658 |
| 1ESR | A | PRO | 76  | C | -3.224551  | 2.390909  | -6.260452  | -2.633658 |
| 1FAO | A | PRO | 162 | C | -2.002069  | 2.045140  | -6.032130  | -3.208614 |
| 1FAO | A | SER | 163 | T | -2.002069  | 2.045140  | -6.032130  | -3.208614 |
| 1FAO | A | LEU | 164 | T | -2.002069  | 2.045140  | -6.032130  | -3.208614 |
| 1FAO | A | GLY | 165 | T | -2.002069  | 2.045140  | -6.032130  | -3.208614 |
| 1FAO | A | THR | 166 | T | -2.613995  | 3.305164  | -6.141108  | -3.666566 |
| 1FAO | A | LYS | 167 | E | -5.260508  | 6.655115  | -10.231506 | -5.330361 |
| 1FAO | A | GLU | 168 | E | -6.350434  | 8.926030  | -12.085753 | -6.595697 |
| 1FAO | A | GLY | 169 | E | -7.302837  | 9.404836  | -13.931334 | -7.460865 |
| 1FAO | A | TYR | 170 | E | -9.669404  | 14.216870 | -14.006815 | -6.518330 |
| 1FAO | A | LEU | 171 | E | -10.610287 | 15.307223 | -13.233422 | -5.612711 |
| 1FAO | A | THR | 172 | E | -10.932214 | 14.600859 | -13.685887 | -5.556609 |
| 1FAO | A | LYS | 173 | E | -9.842573  | 8.405557  | -16.297618 | -6.288402 |
| 1FAO | A | GLN | 174 | E | -6.360380  | 4.254184  | -12.131157 | -5.016149 |
| 1FAO | A | GLY | 175 | T | -2.233727  | 1.846932  | -7.047398  | -4.166161 |
| 1FAO | A | GLY | 176 | T | -1.754112  | 2.509401  | -6.678667  | -4.117669 |
| 1FAO | A | LEU | 177 | T | -1.753777  | 2.512625  | -6.680528  | -4.118081 |
| 1FAO | A | VAL | 178 | T | -1.753773  | 2.512677  | -6.680571  | -4.118088 |
| 1FAO | A | LYS | 179 | T | -1.754043  | 2.511822  | -6.677791  | -4.117500 |
| 1FAO | A | THR | 180 | C | -2.129803  | 2.959959  | -6.060916  | -3.886777 |
| 1FAO | A | TRP | 181 | E | -6.227585  | 8.029876  | -9.409971  | -4.468195 |
| 1FAO | A | LYS | 182 | E | -8.350453  | 10.259402 | -12.795680 | -5.412940 |
| 1FAO | A | THR | 183 | E | -8.800214  | 11.450879 | -13.179569 | -5.968593 |
| 1FAO | A | ARG | 184 | E | -10.237456 | 13.209487 | -16.808754 | -8.037085 |
| 1FAO | A | TRP | 185 | E | -13.699097 | 20.315010 | -15.962763 | -6.336251 |
| 1FAO | A | PHE | 186 | E | -11.900678 | 15.883103 | -12.992419 | -4.681502 |
| 1FAO | A | THR | 187 | E | -10.035251 | 11.017572 | -13.163107 | -4.763494 |
| 1FAO | A | LEU | 188 | E | -8.544702  | 10.622640 | -11.424141 | -4.722505 |
| 1FAO | A | HIS | 189 | E | -8.261784  | 10.821463 | -11.337091 | -4.695012 |
| 1FAO | A | ARG | 190 | T | -8.223538  | 10.956651 | -11.371937 | -4.704604 |
| 1FAO | A | ASN | 191 | T | -8.224562  | 10.949225 | -11.369581 | -4.705026 |
| 1FAO | A | GLU | 192 | E | -8.251889  | 10.956098 | -11.284519 | -4.702065 |
| 1FAO | A | LEU | 193 | E | -8.739325  | 11.426157 | -11.301433 | -4.680572 |
| 1FAO | A | LYS | 194 | E | -9.863442  | 13.014164 | -11.906998 | -4.853791 |
| 1FAO | A | TYR | 195 | E | -13.001645 | 19.537113 | -15.181286 | -6.287456 |
| 1FAO | A | PHE | 196 | E | -10.438750 | 14.129434 | -16.410377 | -7.839077 |
| 1FAO | A | LYS | 197 | T | -8.263146  | 6.831915  | -13.252046 | -4.927234 |
| 1FAO | A | ASP | 198 | T | -6.689262  | 5.222635  | -11.344501 | -4.325019 |
| 1FAO | A | GLN | 199 | T | -5.129523  | 4.676340  | -9.261134  | -4.045121 |
| 1FAO | A | MET | 200 | T | -4.531032  | 5.283765  | -8.219806  | -3.756209 |
| 1FAO | A | SER | 201 | T | -4.294797  | 6.329809  | -7.652060  | -3.719422 |
| 1FAO | A | PRO | 202 | T | -4.252024  | 6.539655  | -7.593087  | -3.705033 |
| 1FAO | A | GLU | 203 | T | -4.240827  | 6.718433  | -7.506209  | -3.696234 |
| 1FAO | A | PRO | 204 | T | -4.377631  | 7.272050  | -7.087786  | -3.609722 |
| 1FAO | A | ILE | 205 | T | -4.777362  | 8.852777  | -6.572141  | -3.627589 |
| 1FAO | A | ARG | 206 | E | -5.579921  | 9.976602  | -6.816150  | -3.587001 |
| 1FAO | A | ILE | 207 | E | -6.220311  | 11.384347 | -6.682081  | -3.711029 |
| 1FAO | A | LEU | 208 | E | -7.930923  | 14.681065 | -8.274772  | -4.054867 |
| 1FAO | A | ASP | 209 | E | -7.409209  | 12.489587 | -9.278638  | -4.755380 |
| 1FAO | A | LEU | 210 | G | -7.384903  | 12.358262 | -9.399641  | -4.766416 |
| 1FAO | A | THR | 211 | G | -7.210545  | 11.140741 | -10.054930 | -4.695723 |
| 1FAO | A | GLU | 212 | G | -7.235323  | 10.815919 | -10.192576 | -4.698128 |
| 1FAO | A | CYS | 213 | C | -7.247209  | 10.692816 | -10.225402 | -4.696880 |
| 1FAO | A | SER | 214 | C | -7.838020  | 8.474085  | -11.890251 | -4.503734 |
| 1FAO | A | ALA | 215 | E | -7.951516  | 7.807449  | -12.042474 | -4.456684 |
| 1FAO | A | VAL | 216 | E | -9.280287  | 9.413325  | -12.666546 | -4.178443 |
| 1FAO | A | GLN | 217 | E | -9.944792  | 8.826399  | -13.805101 | -4.243877 |
| 1FAO | A | PHE | 218 | E | -10.348368 | 9.645969  | -15.057982 | -4.942414 |
| 1FAO | A | ASP | 219 | E | -8.395596  | 6.580356  | -13.506169 | -4.924170 |
| 1FAO | A | TYR | 220 | T | -8.230234  | 6.941349  | -13.572160 | -4.966482 |
| 1FAO | A | SER | 221 | T | -7.909263  | 6.500419  | -13.741959 | -4.953722 |
| 1FAO | A | GLN | 222 | T | -7.868469  | 6.554368  | -13.813379 | -4.976732 |
| 1FAO | A | GLU | 223 | T | -7.554985  | 6.508177  | -13.368315 | -4.869540 |
| 1FAO | A | ARG | 224 | T | -7.713174  | 6.514709  | -13.343885 | -4.854285 |
| 1FAO | A | VAL | 225 | T | -7.776041  | 6.345932  | -13.296756 | -4.826833 |
| 1FAO | A | ASN | 226 | T | -8.017105  | 6.574328  | -12.953756 | -4.771968 |
| 1FAO | A | CYS | 227 | E | -8.071808  | 6.500645  | -12.768777 | -4.722221 |
| 1FAO | A | PHE | 228 | E | -11.529903 | 12.470972 | -15.080688 | -4.958984 |
| 1FAO | A | CYS | 229 | E | -11.188394 | 13.440859 | -13.668184 | -4.596580 |
| 1FAO | A | LEU | 230 | E | -11.037301 | 15.198146 | -12.237856 | -4.367913 |
| 1FAO | A | VAL | 231 | E | -10.980114 | 15.080987 | -12.453812 | -4.409049 |
| 1FAO | A | PHE | 232 | E | -10.052905 | 15.526043 | -11.067012 | -4.664704 |
| 1FAO | A | PRO | 233 | T | -10.027152 | 15.523751 | -11.153363 | -4.674049 |
| 1FAO | A | PHE | 234 | T | -10.074113 | 15.619979 | -11.040336 | -4.705161 |

|      |   |     |     |   |            |           |            |           |
|------|---|-----|-----|---|------------|-----------|------------|-----------|
| 1FAO | A | ARG | 235 | E | -10.140119 | 15.605552 | -10.952195 | -4.744655 |
| 1FAO | A | THR | 236 | E | -10.120540 | 15.794863 | -10.960828 | -4.790327 |
| 1FAO | A | PHE | 237 | E | -11.436690 | 17.062807 | -12.923945 | -5.265803 |
| 1FAO | A | TYR | 238 | E | -11.371643 | 16.281547 | -13.212730 | -5.249513 |
| 1FAO | A | LEU | 239 | E | -8.137175  | 9.911159  | -10.497308 | -4.284029 |
| 1FAO | A | CYS | 240 | E | -6.872272  | 6.030735  | -11.553413 | -4.523251 |
| 1FAO | A | ALA | 241 | C | -5.427956  | 4.453337  | -10.023178 | -4.086584 |
| 1FAO | A | LYS | 242 | C | -5.232322  | 4.418995  | -10.226924 | -4.154256 |
| 1FAO | A | THR | 243 | C | -5.224586  | 4.444199  | -10.248338 | -4.155682 |
| 1FAO | A | GLY | 244 | H | -5.228423  | 4.406229  | -10.249916 | -4.155145 |
| 1FAO | A | VAL | 245 | H | -5.261894  | 4.342211  | -10.166170 | -4.131848 |
| 1FAO | A | GLU | 246 | H | -5.955085  | 4.429521  | -10.807628 | -4.324582 |
| 1FAO | A | ALA | 247 | H | -7.756918  | 6.407869  | -12.043205 | -4.288689 |
| 1FAO | A | ASP | 248 | H | -9.346159  | 7.029428  | -14.331625 | -4.636985 |
| 1FAO | A | GLU | 249 | H | -10.572873 | 9.729587  | -15.162226 | -4.861569 |
| 1FAO | A | TRP | 250 | H | -11.055495 | 18.296717 | -11.377688 | -4.741640 |
| 1FAO | A | ILE | 251 | H | -10.830018 | 17.468867 | -11.306564 | -4.429632 |
| 1FAO | A | LYS | 252 | H | -10.756081 | 17.191143 | -11.489242 | -4.432968 |
| 1FAO | A | ILE | 253 | H | -10.848477 | 17.627506 | -11.148107 | -4.361828 |
| 1FAO | A | LEU | 254 | H | -10.947798 | 17.661053 | -11.070782 | -4.322758 |
| 1FAO | A | ARG | 255 | H | -10.949913 | 15.509306 | -13.084708 | -5.003183 |
| 1FAO | A | TRP | 256 | H | -9.142590  | 13.310005 | -11.932232 | -5.547612 |
| 1FAO | A | LYS | 257 | H | -7.849133  | 10.483035 | -10.601949 | -4.631120 |
| 1FAO | A | LEU | 258 | H | -5.203308  | 6.990747  | -6.505527  | -2.903375 |
| 1FAO | A | SER | 259 | H | -5.203308  | 6.990747  | -6.505527  | -2.903375 |
| 1FAO | A | GLN | 260 | H | -5.203308  | 6.990747  | -6.505527  | -2.903375 |
| 1FAO | A | ILE | 261 | C | -5.203308  | 6.990747  | -6.505527  | -2.903375 |
| 1FIL | A | ALA | 1   | C | -6.809249  | 7.210418  | -8.649396  | -2.967913 |
| 1FIL | A | GLY | 2   | C | -6.809249  | 7.210418  | -8.649396  | -2.967913 |
| 1FIL | A | TRP | 3   | H | -6.809249  | 7.210418  | -8.649396  | -2.967913 |
| 1FIL | A | ASN | 4   | H | -6.809249  | 7.210418  | -8.649396  | -2.967913 |
| 1FIL | A | ALA | 5   | H | -7.723575  | 8.317813  | -10.568665 | -4.049026 |
| 1FIL | A | TYR | 6   | H | -10.056845 | 12.167670 | -12.280231 | -4.276907 |
| 1FIL | A | ILE | 7   | H | -10.240995 | 12.069067 | -11.729825 | -3.829548 |
| 1FIL | A | ASP | 8   | H | -9.920812  | 10.886491 | -12.053829 | -3.735130 |
| 1FIL | A | ASN | 9   | H | -9.687407  | 10.510089 | -12.192618 | -3.776869 |
| 1FIL | A | LEU | 10  | H | -9.129268  | 8.645565  | -12.126633 | -3.809776 |
| 1FIL | A | MET | 11  | H | -7.194148  | 5.587163  | -11.666354 | -4.271530 |
| 1FIL | A | ALA | 12  | H | -6.348870  | 5.249838  | -11.276036 | -4.426493 |
| 1FIL | A | ASP | 13  | C | -6.348899  | 5.247155  | -11.279104 | -4.427919 |
| 1FIL | A | GLY | 14  | C | -6.349596  | 5.241716  | -11.277701 | -4.428545 |
| 1FIL | A | THR | 15  | C | -6.353633  | 5.221638  | -11.273024 | -4.432849 |
| 1FIL | A | CYS | 16  | E | -6.510695  | 5.146784  | -11.159004 | -4.476190 |
| 1FIL | A | GLN | 17  | E | -10.429215 | 7.082009  | -15.769099 | -5.062092 |
| 1FIL | A | ASP | 18  | E | -11.051400 | 13.938555 | -10.407369 | -2.941216 |
| 1FIL | A | ALA | 19  | E | -9.184519  | 12.693232 | -7.859129  | -2.487481 |
| 1FIL | A | ALA | 20  | E | -9.177690  | 12.740596 | -7.880888  | -2.495436 |
| 1FIL | A | ILE | 21  | E | -9.160713  | 12.846398 | -7.965649  | -2.542020 |
| 1FIL | A | VAL | 22  | E | -8.247930  | 12.342816 | -9.049008  | -3.752765 |
| 1FIL | A | GLY | 23  | E | -6.612082  | 8.837580  | -7.912810  | -3.443441 |
| 1FIL | A | TYR | 24  | T | -5.992864  | 9.563860  | -6.643804  | -3.130482 |
| 1FIL | A | LYS | 25  | T | -5.585686  | 7.737743  | -6.894400  | -2.785089 |
| 1FIL | A | ASP | 26  | T | -5.509080  | 7.775507  | -6.990427  | -2.778395 |
| 1FIL | A | SER | 27  | T | -5.513266  | 7.744225  | -6.973885  | -2.768336 |
| 1FIL | A | PRO | 28  | T | -5.607084  | 7.597878  | -6.826000  | -2.655753 |
| 1FIL | A | SER | 29  | E | -5.853089  | 6.375634  | -7.270463  | -2.500001 |
| 1FIL | A | VAL | 30  | E | -6.746405  | 8.163732  | -7.703397  | -2.729571 |
| 1FIL | A | TRP | 31  | E | -8.076516  | 12.945499 | -7.992800  | -3.245295 |
| 1FIL | A | ALA | 32  | E | -5.013162  | 8.113852  | -5.881809  | -3.078221 |
| 1FIL | A | ALA | 33  | E | -4.821736  | 7.662923  | -6.174728  | -3.036072 |
| 1FIL | A | VAL | 34  | T | -4.790719  | 7.589591  | -6.313815  | -3.054713 |
| 1FIL | A | PRO | 35  | T | -4.789044  | 7.596809  | -6.323126  | -3.057489 |
| 1FIL | A | GLY | 36  | T | -4.790869  | 7.580668  | -6.318628  | -3.056577 |
| 1FIL | A | LYS | 37  | T | -5.472630  | 6.483223  | -7.283224  | -3.010794 |
| 1FIL | A | THR | 38  | C | -6.514615  | 6.528466  | -8.929361  | -3.428212 |
| 1FIL | A | PHE | 39  | G | -8.097312  | 11.427705 | -9.171658  | -3.814466 |
| 1FIL | A | VAL | 40  | G | -7.874204  | 10.227631 | -7.851258  | -2.606340 |
| 1FIL | A | ASN | 41  | G | -7.065883  | 8.935019  | -8.505715  | -3.087321 |
| 1FIL | A | ILE | 42  | C | -7.056308  | 8.934562  | -8.554329  | -3.092505 |
| 1FIL | A | THR | 43  | C | -7.049773  | 8.876342  | -8.594688  | -3.084514 |
| 1FIL | A | PRO | 44  | H | -7.058214  | 8.751871  | -8.632636  | -3.084166 |
| 1FIL | A | ALA | 45  | H | -7.203597  | 8.506755  | -8.898738  | -3.248947 |
| 1FIL | A | GLU | 46  | H | -8.890179  | 8.544995  | -11.457743 | -3.114506 |
| 1FIL | A | VAL | 47  | H | -8.869115  | 9.772230  | -10.657641 | -3.017571 |
| 1FIL | A | GLY | 48  | H | -8.689327  | 9.773930  | -10.406507 | -3.107294 |
| 1FIL | A | VAL | 49  | H | -8.589150  | 9.774121  | -10.269040 | -3.034704 |
| 1FIL | A | LEU | 50  | H | -8.181570  | 8.973015  | -10.274073 | -3.205646 |
| 1FIL | A | VAL | 51  | H | -8.059713  | 8.332192  | -10.937577 | -3.396365 |
| 1FIL | A | GLY | 52  | T | -8.025308  | 7.214256  | -11.674971 | -3.514073 |
| 1FIL | A | LYS | 53  | T | -8.105454  | 6.666439  | -12.103227 | -3.592348 |
| 1FIL | A | ASP | 54  | T | -8.162753  | 6.386348  | -12.296073 | -3.677473 |

|      |   |     |     |   |            |           |            |           |
|------|---|-----|-----|---|------------|-----------|------------|-----------|
| 1FIL | A | ARG | 55  | T | -8.601429  | 4.515957  | -14.311594 | -4.027539 |
| 1FIL | A | SER | 56  | T | -8.976158  | 3.558374  | -14.733986 | -3.847044 |
| 1FIL | A | SER | 57  | T | -9.516434  | 6.324755  | -13.461886 | -3.454868 |
| 1FIL | A | PHE | 58  | T | -8.857688  | 10.131506 | -10.445783 | -3.592988 |
| 1FIL | A | TYR | 59  | T | -7.884616  | 8.790938  | -9.739955  | -3.414723 |
| 1FIL | A | VAL | 60  | T | -6.404750  | 8.678606  | -7.919257  | -3.569406 |
| 1FIL | A | ASN | 61  | T | -6.399210  | 8.721100  | -7.944319  | -3.580317 |
| 1FIL | A | GLY | 62  | T | -6.360869  | 9.004191  | -7.992910  | -3.637053 |
| 1FIL | A | LEU | 63  | E | -6.347358  | 9.076357  | -8.006486  | -3.648449 |
| 1FIL | A | THR | 64  | E | -6.376908  | 9.118645  | -7.953838  | -3.676547 |
| 1FIL | A | LEU | 65  | E | -7.589610  | 12.159487 | -9.490683  | -4.351432 |
| 1FIL | A | GLY | 66  | T | -7.589020  | 11.697362 | -9.814857  | -4.413682 |
| 1FIL | A | GLY | 67  | T | -8.012628  | 10.178915 | -10.873762 | -4.362905 |
| 1FIL | A | GLN | 68  | E | -8.532805  | 8.341288  | -13.304012 | -4.962649 |
| 1FIL | A | LYS | 69  | E | -8.891465  | 7.507658  | -14.555972 | -5.324862 |
| 1FIL | A | CYS | 70  | E | -9.032293  | 7.479893  | -14.531712 | -5.216919 |
| 1FIL | A | SER | 71  | E | -9.759391  | 10.980211 | -11.926322 | -3.728206 |
| 1FIL | A | VAL | 72  | E | -9.604891  | 11.192126 | -11.833964 | -3.761263 |
| 1FIL | A | ILE | 73  | E | -9.588615  | 11.200028 | -11.871622 | -3.762935 |
| 1FIL | A | ARG | 74  | E | -9.620630  | 11.158978 | -11.816036 | -3.743687 |
| 1FIL | A | ASP | 75  | E | -9.886145  | 11.226953 | -12.585043 | -4.096211 |
| 1FIL | A | SER | 76  | E | -9.227304  | 10.402522 | -12.234095 | -4.402991 |
| 1FIL | A | LEU | 77  | T | -7.406341  | 8.502186  | -10.581594 | -4.408969 |
| 1FIL | A | LEU | 78  | T | -6.480103  | 6.537902  | -10.124705 | -4.147449 |
| 1FIL | A | GLN | 79  | T | -6.460652  | 6.539608  | -10.200152 | -4.154471 |
| 1FIL | A | ASP | 80  | T | -6.457621  | 6.546651  | -10.216053 | -4.156624 |
| 1FIL | A | GLY | 81  | T | -6.462130  | 6.518790  | -10.201606 | -4.154322 |
| 1FIL | A | GLU | 82  | T | -6.590753  | 6.055202  | -10.125596 | -4.092913 |
| 1FIL | A | PHE | 83  | T | -8.403152  | 6.800587  | -12.589817 | -4.393778 |
| 1FIL | A | SER | 84  | E | -9.556411  | 8.054268  | -13.361263 | -4.568369 |
| 1FIL | A | MET | 85  | E | -12.772812 | 12.498037 | -17.108725 | -5.826592 |
| 1FIL | A | ASP | 86  | E | -15.345457 | 14.500649 | -22.116365 | -7.323288 |
| 1FIL | A | LEU | 87  | E | -12.377802 | 14.564606 | -18.521326 | -8.124744 |
| 1FIL | A | ARG | 88  | E | -9.424741  | 11.093593 | -16.628699 | -8.378121 |
| 1FIL | A | THR | 89  | E | -6.158740  | 6.552048  | -9.592387  | -4.401683 |
| 1FIL | A | LYS | 90  | C | -3.624025  | 3.415519  | -7.503331  | -4.035146 |
| 1FIL | A | SER | 91  | C | -1.084895  | 1.975686  | -4.724373  | -3.625466 |
| 1FIL | A | THR | 92  | T | -0.578833  | 2.694638  | -5.167815  | -4.129628 |
| 1FIL | A | GLY | 93  | T | -0.566669  | 2.765613  | -5.236347  | -4.164364 |
| 1FIL | A | GLY | 94  | T | -0.566752  | 2.764895  | -5.235347  | -4.164010 |
| 1FIL | A | ALA | 95  | T | -0.573180  | 2.741754  | -5.179697  | -4.140524 |
| 1FIL | A | PRO | 96  | C | -1.078052  | 2.661400  | -4.063434  | -3.362125 |
| 1FIL | A | THR | 97  | C | -3.254215  | 4.704464  | -5.699981  | -3.568899 |
| 1FIL | A | PHE | 98  | C | -7.684962  | 8.819760  | -10.885419 | -4.586539 |
| 1FIL | A | ASN | 99  | E | -11.301014 | 12.273269 | -17.762107 | -6.994248 |
| 1FIL | A | VAL | 100 | E | -11.497718 | 13.930072 | -15.392855 | -5.729021 |
| 1FIL | A | THR | 101 | E | -11.372559 | 14.485944 | -13.603618 | -4.776982 |
| 1FIL | A | VAL | 102 | E | -11.344750 | 14.325387 | -13.676106 | -4.744749 |
| 1FIL | A | THR | 103 | E | -11.319122 | 14.189215 | -13.835529 | -4.783359 |
| 1FIL | A | LYS | 104 | E | -11.374315 | 14.162726 | -14.114743 | -4.967962 |
| 1FIL | A | THR | 105 | T | -11.264864 | 13.884344 | -14.196214 | -5.060037 |
| 1FIL | A | ASP | 106 | T | -11.325721 | 13.839982 | -14.085429 | -4.885153 |
| 1FIL | A | LYS | 107 | T | -11.254416 | 14.659996 | -13.513860 | -4.776310 |
| 1FIL | A | THR | 108 | E | -11.218329 | 15.112797 | -13.055722 | -4.604353 |
| 1FIL | A | LEU | 109 | E | -11.231416 | 15.451232 | -12.768111 | -4.525315 |
| 1FIL | A | VAL | 110 | E | -11.252162 | 16.470564 | -11.941613 | -4.268914 |
| 1FIL | A | LEU | 111 | E | -11.387396 | 17.317795 | -11.515501 | -4.162099 |
| 1FIL | A | LEU | 112 | E | -10.716824 | 15.356739 | -13.284778 | -5.474893 |
| 1FIL | A | MET | 113 | E | -8.122960  | 9.891909  | -10.792930 | -4.636638 |
| 1FIL | A | GLY | 114 | E | -6.282444  | 6.886774  | -8.535851  | -3.527415 |
| 1FIL | A | LYS | 115 | T | -4.819809  | 6.256929  | -6.576739  | -3.141509 |
| 1FIL | A | GLU | 116 | T | -4.107262  | 5.587455  | -7.173595  | -3.632460 |
| 1FIL | A | GLY | 117 | T | -3.760255  | 4.826733  | -7.628488  | -3.762522 |
| 1FIL | A | VAL | 118 | T | -3.732615  | 4.854347  | -7.639673  | -3.739962 |
| 1FIL | A | HIS | 119 | C | -3.703645  | 4.966105  | -7.584561  | -3.720075 |
| 1FIL | A | GLY | 120 | H | -3.792504  | 4.764939  | -7.774637  | -3.817832 |
| 1FIL | A | GLY | 121 | H | -4.106873  | 4.387694  | -8.008613  | -3.796326 |
| 1FIL | A | LEU | 122 | H | -5.044278  | 6.415417  | -7.312074  | -3.317726 |
| 1FIL | A | ILE | 123 | H | -5.368262  | 7.100078  | -6.893928  | -3.350280 |
| 1FIL | A | ASN | 124 | H | -8.358604  | 8.665567  | -11.737990 | -4.360913 |
| 1FIL | A | LYS | 125 | H | -9.303687  | 9.844239  | -13.377666 | -5.126595 |
| 1FIL | A | LYS | 126 | H | -12.040070 | 12.259459 | -18.098797 | -6.576917 |
| 1FIL | A | CYS | 127 | H | -12.721903 | 11.635666 | -17.480426 | -5.223523 |
| 1FIL | A | TYR | 128 | H | -12.534628 | 11.606109 | -16.547730 | -4.747680 |
| 1FIL | A | GLU | 129 | H | -11.645712 | 10.361830 | -14.995939 | -4.238340 |
| 1FIL | A | MET | 130 | H | -11.542612 | 10.880195 | -14.615666 | -4.136360 |
| 1FIL | A | ALA | 131 | H | -11.536056 | 10.887463 | -14.635323 | -4.133612 |
| 1FIL | A | SER | 132 | H | -11.570623 | 10.776410 | -14.498395 | -4.061815 |
| 1FIL | A | HIS | 133 | H | -11.623254 | 10.697299 | -14.418765 | -4.056851 |
| 1FIL | A | LEU | 134 | H | -12.444049 | 12.770836 | -13.978967 | -3.939267 |
| 1FIL | A | ARG | 135 | H | -13.873163 | 11.660993 | -17.385512 | -4.303337 |

|      |   |     |     |   |            |           |            |           |
|------|---|-----|-----|---|------------|-----------|------------|-----------|
| 1FIL | A | ARG | 136 | H | -10.858544 | 7.818374  | -13.865951 | -3.324207 |
| 1FIL | A | SER | 137 | C | -10.858544 | 7.818374  | -13.865951 | -3.324207 |
| 1FIL | A | GLN | 138 | C | -10.858544 | 7.818374  | -13.865951 | -3.324207 |
| 1FIL | A | TYR | 139 | C | -10.858544 | 7.818374  | -13.865951 | -3.324207 |
| 1FLO | A | ILE | 150 | C | -8.321273  | 9.866298  | -10.376860 | -3.754495 |
| 1FLO | A | ASP | 151 | C | -8.321273  | 9.866298  | -10.376860 | -3.754495 |
| 1FLO | A | VAL | 152 | G | -8.321273  | 9.866298  | -10.376860 | -3.754495 |
| 1FLO | A | SER | 153 | G | -8.321273  | 9.866298  | -10.376860 | -3.754495 |
| 1FLO | A | ARG | 154 | G | -10.947352 | 12.591047 | -13.695147 | -4.716392 |
| 1FLO | A | LEU | 155 | C | -12.479796 | 17.552688 | -14.197788 | -5.566812 |
| 1FLO | A | ASP | 156 | C | -13.011384 | 15.289050 | -15.945036 | -5.308636 |
| 1FLO | A | LEU | 157 | E | -12.891083 | 15.027508 | -16.155746 | -5.283858 |
| 1FLO | A | ARG | 158 | E | -12.516777 | 14.121176 | -16.195586 | -5.169384 |
| 1FLO | A | ILE | 159 | E | -9.125877  | 12.503680 | -10.609441 | -4.247817 |
| 1FLO | A | GLY | 160 | E | -8.808338  | 11.064364 | -11.511637 | -4.281532 |
| 1FLO | A | CYS | 161 | E | -8.685367  | 10.916611 | -11.671521 | -4.261144 |
| 1FLO | A | ILE | 162 | E | -8.622827  | 10.924367 | -11.677517 | -4.198558 |
| 1FLO | A | ILE | 163 | E | -8.560827  | 10.861396 | -11.760895 | -4.184258 |
| 1FLO | A | THR | 164 | E | -8.843765  | 9.854968  | -12.506505 | -4.149590 |
| 1FLO | A | ALA | 165 | E | -8.954030  | 10.784114 | -12.053790 | -4.021473 |
| 1FLO | A | ARG | 166 | E | -8.257902  | 9.855589  | -11.430511 | -4.227822 |
| 1FLO | A | LYS | 167 | E | -7.578231  | 10.151926 | -11.072712 | -4.711773 |
| 1FLO | A | HIS | 168 | T | -6.793718  | 8.225641  | -10.945268 | -4.649381 |
| 1FLO | A | PRO | 169 | T | -6.448916  | 7.410890  | -11.019787 | -4.514419 |
| 1FLO | A | ASP | 170 | T | -6.431782  | 7.421054  | -11.060600 | -4.517381 |
| 1FLO | A | ALA | 171 | T | -6.453381  | 7.342729  | -11.052191 | -4.525368 |
| 1FLO | A | ASP | 172 | T | -6.518973  | 6.995698  | -11.066873 | -4.480906 |
| 1FLO | A | SER | 173 | T | -6.889352  | 6.517318  | -11.202732 | -4.357553 |
| 1FLO | A | LEU | 174 | T | -8.448938  | 8.285229  | -12.335185 | -4.539479 |
| 1FLO | A | TYR | 175 | E | -11.896765 | 13.412045 | -14.623051 | -4.761123 |
| 1FLO | A | VAL | 176 | E | -12.295459 | 13.967474 | -15.344995 | -5.018116 |
| 1FLO | A | GLU | 177 | E | -12.117538 | 13.933437 | -15.445036 | -5.104076 |
| 1FLO | A | GLU | 178 | E | -9.602738  | 12.739995 | -11.559707 | -4.566450 |
| 1FLO | A | VAL | 179 | E | -9.259952  | 11.925169 | -12.176657 | -4.658011 |
| 1FLO | A | ASP | 180 | E | -7.195473  | 6.462795  | -11.613453 | -4.406065 |
| 1FLO | A | VAL | 181 | T | -4.934561  | 4.868262  | -9.055956  | -4.060039 |
| 1FLO | A | GLY | 182 | T | -3.018528  | 3.460165  | -7.119683  | -3.840705 |
| 1FLO | A | GLU | 183 | T | -3.018285  | 3.461163  | -7.121681  | -3.840846 |
| 1FLO | A | ILE | 184 | T | -3.018142  | 3.462120  | -7.122731  | -3.840904 |
| 1FLO | A | ALA | 185 | T | -3.018646  | 3.459681  | -7.118854  | -3.840390 |
| 1FLO | A | PRO | 186 | T | -3.042215  | 3.402361  | -7.039239  | -3.829974 |
| 1FLO | A | ARG | 187 | E | -7.348040  | 6.641594  | -11.734894 | -4.121751 |
| 1FLO | A | THR | 188 | E | -7.786554  | 8.434097  | -11.320654 | -4.173901 |
| 1FLO | A | VAL | 189 | E | -8.327477  | 12.525380 | -10.473758 | -4.538788 |
| 1FLO | A | VAL | 190 | E | -8.032600  | 12.944103 | -10.147795 | -4.530732 |
| 1FLO | A | SER | 191 | E | -7.574336  | 11.802206 | -10.454883 | -4.700272 |
| 1FLO | A | GLY | 192 | C | -6.390994  | 11.835220 | -8.600384  | -4.798614 |
| 1FLO | A | LEU | 193 | T | -6.345164  | 11.948365 | -8.572823  | -4.767419 |
| 1FLO | A | VAL | 194 | T | -6.257606  | 11.556983 | -8.722331  | -4.666062 |
| 1FLO | A | ASN | 195 | T | -6.260216  | 11.489007 | -8.747355  | -4.662953 |
| 1FLO | A | HIS | 196 | T | -6.293847  | 11.524220 | -8.639902  | -4.650714 |
| 1FLO | A | VAL | 197 | T | -6.969324  | 10.125065 | -9.930233  | -4.205329 |
| 1FLO | A | PRO | 198 | C | -7.029068  | 9.220664  | -10.547325 | -4.271532 |
| 1FLO | A | LEU | 199 | G | -7.505318  | 8.884252  | -11.652874 | -4.528578 |
| 1FLO | A | GLU | 200 | G | -7.580463  | 8.758275  | -11.700564 | -4.574299 |
| 1FLO | A | GLN | 201 | G | -7.599783  | 8.721554  | -11.663091 | -4.579563 |
| 1FLO | A | MET | 202 | T | -7.991586  | 9.877154  | -11.510643 | -4.909465 |
| 1FLO | A | GLN | 203 | T | -9.894112  | 9.704302  | -15.249816 | -5.539097 |
| 1FLO | A | ASN | 204 | T | -10.438064 | 8.697262  | -16.289309 | -5.692136 |
| 1FLO | A | ARG | 205 | E | -12.342588 | 13.600794 | -16.103033 | -5.098867 |
| 1FLO | A | MET | 206 | E | -11.957004 | 16.769291 | -13.493876 | -4.730098 |
| 1FLO | A | VAL | 207 | E | -11.682441 | 17.266416 | -12.832023 | -4.584460 |
| 1FLO | A | ILE | 208 | E | -11.704393 | 17.565861 | -12.596960 | -4.556563 |
| 1FLO | A | LEU | 209 | E | -11.835518 | 18.521826 | -11.968084 | -4.462809 |
| 1FLO | A | LEU | 210 | E | -11.770440 | 17.829260 | -12.553110 | -4.618623 |
| 1FLO | A | CYS | 211 | T | -10.932646 | 12.281329 | -14.766798 | -5.264350 |
| 1FLO | A | ASN | 212 | T | -10.080547 | 10.770925 | -13.927684 | -4.817872 |
| 1FLO | A | LEU | 213 | T | -6.783139  | 11.098887 | -8.219566  | -4.158358 |
| 1FLO | A | LYS | 214 | C | -6.495977  | 10.756765 | -8.685521  | -4.276438 |
| 1FLO | A | PRO | 215 | C | -6.430028  | 10.753241 | -8.796505  | -4.270107 |
| 1FLO | A | ALA | 216 | E | -5.570516  | 8.476146  | -8.945737  | -4.424054 |
| 1FLO | A | LYS | 217 | E | -4.726526  | 9.069802  | -7.567480  | -4.444454 |
| 1FLO | A | MET | 218 | T | -4.707122  | 9.157618  | -7.583133  | -4.467579 |
| 1FLO | A | ARG | 219 | T | -4.714500  | 9.146282  | -7.565938  | -4.468828 |
| 1FLO | A | GLY | 220 | T | -4.717556  | 9.137860  | -7.556578  | -4.470613 |
| 1FLO | A | VAL | 221 | T | -4.836264  | 9.438202  | -7.237362  | -4.469937 |
| 1FLO | A | LEU | 222 | E | -6.289101  | 11.358852 | -8.372033  | -4.676830 |
| 1FLO | A | SER | 223 | E | -7.639733  | 10.497322 | -10.582995 | -4.687855 |
| 1FLO | A | GLN | 224 | C | -9.014673  | 10.458094 | -12.580921 | -4.935997 |
| 1FLO | A | ALA | 225 | C | -10.478532 | 13.886304 | -13.223769 | -4.897014 |
| 1FLO | A | MET | 226 | E | -10.313463 | 14.384748 | -12.772026 | -4.936099 |

|      |   |     |     |   |            |           |            |           |
|------|---|-----|-----|---|------------|-----------|------------|-----------|
| 1FLO | A | VAL | 227 | E | -10.231078 | 14.309229 | -12.883170 | -4.956624 |
| 1FLO | A | MET | 228 | C | -10.244643 | 14.317333 | -12.852715 | -4.960264 |
| 1FLO | A | CYS | 229 | E | -9.618600  | 10.317210 | -13.880271 | -4.815089 |
| 1FLO | A | ALA | 230 | E | -7.033979  | 5.849814  | -11.588087 | -4.352241 |
| 1FLO | A | SER | 231 | E | -5.580117  | 5.534123  | -10.706320 | -4.856104 |
| 1FLO | A | SER | 232 | E | -4.727286  | 6.820635  | -8.985393  | -4.692664 |
| 1FLO | A | PRO | 233 | T | -4.724706  | 6.827506  | -9.001304  | -4.695501 |
| 1FLO | A | GLU | 234 | T | -4.724794  | 6.827376  | -9.000507  | -4.695514 |
| 1FLO | A | LYS | 235 | E | -4.736816  | 6.848165  | -8.947915  | -4.702586 |
| 1FLO | A | ILE | 236 | E | -4.884289  | 7.226504  | -8.473094  | -4.645132 |
| 1FLO | A | GLU | 237 | E | -7.943276  | 8.428929  | -12.655567 | -5.343194 |
| 1FLO | A | ILE | 238 | E | -10.282182 | 14.519817 | -11.847573 | -4.316193 |
| 1FLO | A | LEU | 239 | C | -7.775694  | 11.342104 | -8.686192  | -3.598551 |
| 1FLO | A | ALA | 240 | B | -4.971215  | 6.975452  | -7.514780  | -3.720570 |
| 1FLO | A | PRO | 241 | C | -4.346379  | 8.254651  | -6.962936  | -4.057961 |
| 1FLO | A | PRO | 242 | T | -4.122746  | 7.778686  | -7.328313  | -4.123472 |
| 1FLO | A | ASN | 243 | T | -3.952093  | 7.451566  | -7.571700  | -4.180465 |
| 1FLO | A | GLY | 244 | T | -3.925136  | 7.426295  | -7.658765  | -4.197195 |
| 1FLO | A | SER | 245 | T | -4.033449  | 7.524516  | -7.698900  | -4.293318 |
| 1FLO | A | VAL | 246 | T | -4.320724  | 6.638214  | -8.341078  | -4.325174 |
| 1FLO | A | PRO | 247 | T | -4.663067  | 6.562688  | -8.512162  | -4.372733 |
| 1FLO | A | GLY | 248 | T | -5.711011  | 7.071111  | -9.601672  | -4.512935 |
| 1FLO | A | ASP | 249 | E | -7.323296  | 7.959619  | -11.292085 | -4.480559 |
| 1FLO | A | ARG | 250 | E | -8.615274  | 8.614125  | -12.563484 | -4.490907 |
| 1FLO | A | ILE | 251 | B | -6.918134  | 13.790320 | -7.149688  | -4.281236 |
| 1FLO | A | THR | 252 | C | -6.652048  | 14.591293 | -7.018087  | -4.392417 |
| 1FLO | A | PHE | 253 | T | -6.182004  | 14.232718 | -6.553575  | -4.174718 |
| 1FLO | A | ASP | 254 | T | -4.110393  | 8.864587  | -6.075012  | -4.172272 |
| 1FLO | A | ALA | 255 | T | -4.088918  | 8.891085  | -6.163109  | -4.185104 |
| 1FLO | A | PHE | 256 | T | -4.092580  | 8.852720  | -6.164617  | -4.185335 |
| 1FLO | A | PRO | 257 | T | -4.094509  | 8.813042  | -6.172656  | -4.184154 |
| 1FLO | A | GLY | 258 | C | -4.101185  | 8.708911  | -6.206172  | -4.190035 |
| 1FLO | A | GLU | 259 | C | -5.927131  | 8.929619  | -9.346049  | -4.568883 |
| 1FLO | A | PRO | 260 | C | -6.851613  | 6.433624  | -12.403672 | -4.735417 |
| 1FLO | A | ASP | 261 | T | -7.002348  | 5.272517  | -13.042833 | -4.769504 |
| 1FLO | A | LYS | 262 | T | -7.085292  | 5.670386  | -12.878013 | -4.807181 |
| 1FLO | A | GLU | 263 | T | -7.789133  | 9.035516  | -12.716128 | -4.986146 |
| 1FLO | A | LEU | 264 | T | -6.029319  | 8.477372  | -8.998482  | -4.350463 |
| 1FLO | A | ASN | 265 | T | -4.696558  | 6.719420  | -8.492763  | -4.471955 |
| 1FLO | A | PRO | 266 | T | -4.666282  | 6.825425  | -8.535780  | -4.473220 |
| 1FLO | A | LYS | 267 | T | -4.666956  | 6.822334  | -8.532014  | -4.472681 |
| 1FLO | A | LYS | 268 | T | -4.667371  | 6.822204  | -8.528813  | -4.472388 |
| 1FLO | A | LYS | 269 | T | -4.727755  | 6.651782  | -8.490233  | -4.487740 |
| 1FLO | A | ILE | 270 | H | -6.424406  | 8.971907  | -9.429133  | -4.515614 |
| 1FLO | A | TRP | 271 | H | -8.603698  | 14.039008 | -11.105264 | -5.126935 |
| 1FLO | A | GLU | 272 | H | -8.674677  | 13.582782 | -11.393659 | -5.107182 |
| 1FLO | A | GLN | 273 | H | -9.019181  | 12.502837 | -12.503349 | -5.078391 |
| 1FLO | A | ILE | 274 | H | -9.052370  | 12.112649 | -12.547329 | -4.973938 |
| 1FLO | A | GLN | 275 | G | -9.103532  | 11.215740 | -12.759901 | -4.846980 |
| 1FLO | A | PRO | 276 | G | -9.061271  | 11.245358 | -12.797147 | -4.827699 |
| 1FLO | A | ASP | 277 | G | -9.569485  | 11.804201 | -13.017364 | -4.767549 |
| 1FLO | A | LEU | 278 | E | -10.070128 | 12.712071 | -13.048259 | -4.673904 |
| 1FLO | A | HIS | 279 | E | -9.708618  | 8.604107  | -15.177585 | -5.165734 |
| 1FLO | A | THR | 280 | E | -8.549163  | 7.081362  | -14.636080 | -5.462635 |
| 1FLO | A | ASN | 281 | T | -6.852156  | 6.898968  | -11.982727 | -5.171589 |
| 1FLO | A | ASP | 282 | T | -6.719390  | 7.106021  | -11.920563 | -5.067464 |
| 1FLO | A | GLU | 283 | T | -6.716222  | 7.123764  | -11.926955 | -5.065677 |
| 1FLO | A | CYS | 284 | T | -6.718956  | 7.122691  | -11.909468 | -5.064338 |
| 1FLO | A | VAL | 285 | B | -6.742720  | 7.134250  | -11.801228 | -5.046196 |
| 1FLO | A | ALA | 286 | E | -7.647752  | 8.070906  | -11.722705 | -4.661276 |
| 1FLO | A | THR | 287 | E | -8.422891  | 13.909640 | -10.444005 | -5.096507 |
| 1FLO | A | TYR | 288 | E | -7.076746  | 14.036253 | -8.010336  | -4.727125 |
| 1FLO | A | LYS | 289 | T | -6.564964  | 14.190593 | -7.459091  | -4.581772 |
| 1FLO | A | GLY | 290 | T | -6.535134  | 14.191491 | -7.525314  | -4.570572 |
| 1FLO | A | VAL | 291 | E | -6.535926  | 14.193043 | -7.518391  | -4.569656 |
| 1FLO | A | PRO | 292 | E | -6.556855  | 14.191180 | -7.429627  | -4.549057 |
| 1FLO | A | PHE | 293 | C | -6.816448  | 14.237072 | -7.339838  | -4.478887 |
| 1FLO | A | GLU | 294 | E | -6.142172  | 7.742471  | -9.860317  | -4.607201 |
| 1FLO | A | VAL | 295 | E | -4.316242  | 6.449838  | -8.231743  | -4.639293 |
| 1FLO | A | LYS | 296 | T | -4.012977  | 6.483024  | -8.299641  | -4.640481 |
| 1FLO | A | GLY | 297 | T | -4.005137  | 6.504857  | -8.328347  | -4.643653 |
| 1FLO | A | LYS | 298 | T | -4.005302  | 6.503145  | -8.327677  | -4.643593 |
| 1FLO | A | GLY | 299 | E | -4.021016  | 6.475705  | -8.285684  | -4.644171 |
| 1FLO | A | VAL | 300 | E | -4.536291  | 6.576548  | -8.457654  | -4.643580 |
| 1FLO | A | CYS | 301 | C | -6.570150  | 8.144459  | -10.477579 | -4.869272 |
| 1FLO | A | ARG | 302 | B | -9.858934  | 10.323972 | -13.755544 | -4.429024 |
| 1FLO | A | ALA | 303 | T | -10.045748 | 9.492498  | -14.837380 | -4.730699 |
| 1FLO | A | GLN | 304 | T | -10.250570 | 7.783087  | -17.478791 | -5.773489 |
| 1FLO | A | THR | 305 | T | -9.343748  | 7.561062  | -15.793731 | -5.606528 |
| 1FLO | A | MET | 306 | T | -9.358369  | 7.536682  | -15.768329 | -5.620868 |
| 1FLO | A | SER | 307 | T | -9.365012  | 7.515067  | -15.749354 | -5.622089 |

|      |   |     |     |   |            |           |            |           |
|------|---|-----|-----|---|------------|-----------|------------|-----------|
| 1FLO | A | ASN | 308 | T | -9.411165  | 7.533688  | -15.616563 | -5.608052 |
| 1FLO | A | SER | 309 | E | -9.437055  | 7.969175  | -15.277118 | -5.553319 |
| 1FLO | A | GLY | 310 | E | -7.969287  | 11.784904 | -9.628884  | -4.340380 |
| 1FLO | A | ILE | 311 | E | -7.969287  | 11.784904 | -9.628884  | -4.340380 |
| 1FLO | A | LYS | 312 | E | -7.969287  | 11.784904 | -9.628884  | -4.340380 |
| 1FLO | A | LEU | 313 | C | -7.969287  | 11.784904 | -9.628884  | -4.340380 |
| 1FNA | A | GLY | 6   | C | -7.052953  | 9.158720  | -9.320463  | -3.675061 |
| 1FNA | A | SER | 7   | C | -7.052953  | 9.158720  | -9.320463  | -3.675061 |
| 1FNA | A | LEU | 8   | E | -7.052953  | 9.158720  | -9.320463  | -3.675061 |
| 1FNA | A | GLU | 9   | E | -7.052953  | 9.158720  | -9.320463  | -3.675061 |
| 1FNA | A | VAL | 10  | E | -5.899319  | 9.801555  | -6.729343  | -3.437474 |
| 1FNA | A | VAL | 11  | E | -5.852794  | 9.600739  | -6.854260  | -3.390058 |
| 1FNA | A | ALA | 12  | E | -5.855304  | 9.517919  | -6.859121  | -3.366076 |
| 1FNA | A | ALA | 13  | E | -5.834089  | 9.494386  | -6.925183  | -3.357533 |
| 1FNA | A | THR | 14  | E | -5.830597  | 9.503809  | -6.939647  | -3.357880 |
| 1FNA | A | PRO | 15  | T | -6.955193  | 8.488613  | -8.726441  | -3.083704 |
| 1FNA | A | THR | 16  | T | -7.540191  | 9.059096  | -9.177641  | -3.179918 |
| 1FNA | A | SER | 17  | E | -7.693812  | 9.439191  | -8.963038  | -3.263504 |
| 1FNA | A | LEU | 18  | E | -8.807222  | 11.546153 | -9.665375  | -3.593636 |
| 1FNA | A | LEU | 19  | E | -10.599676 | 14.435970 | -11.560384 | -3.956990 |
| 1FNA | A | ILE | 20  | E | -10.760761 | 15.325260 | -11.474179 | -4.106666 |
| 1FNA | A | SER | 21  | E | -10.280662 | 13.491893 | -11.557892 | -4.114337 |
| 1FNA | A | TRP | 22  | E | -7.745120  | 10.848966 | -8.268825  | -3.500517 |
| 1FNA | A | ASP | 23  | C | -4.896765  | 5.755769  | -6.503983  | -2.916466 |
| 1FNA | A | ALA | 24  | C | -4.296029  | 5.823516  | -6.411310  | -3.028934 |
| 1FNA | A | PRO | 25  | C | -4.149077  | 6.152768  | -6.453402  | -3.087151 |
| 1FNA | A | ALA | 26  | C | -4.117778  | 6.227693  | -6.461473  | -3.067013 |
| 1FNA | A | VAL | 27  | C | -4.118961  | 6.218756  | -6.458042  | -3.066087 |
| 1FNA | A | THR | 28  | C | -4.303190  | 6.399665  | -6.443312  | -3.120821 |
| 1FNA | A | VAL | 29  | C | -4.916697  | 7.374866  | -6.597398  | -3.171275 |
| 1FNA | A | ARG | 30  | C | -5.874522  | 7.615849  | -6.608446  | -2.692202 |
| 1FNA | A | TYR | 31  | E | -9.250224  | 12.310290 | -8.919185  | -3.121552 |
| 1FNA | A | TYR | 32  | E | -12.537130 | 16.297322 | -11.657734 | -3.524676 |
| 1FNA | A | ARG | 33  | E | -13.291269 | 19.383676 | -15.264840 | -6.320350 |
| 1FNA | A | ILE | 34  | E | -11.491639 | 18.650455 | -14.033202 | -6.923212 |
| 1FNA | A | THR | 35  | E | -10.350647 | 15.259858 | -16.320324 | -8.579491 |
| 1FNA | A | TYR | 36  | E | -7.718086  | 11.800066 | -13.928639 | -8.167088 |
| 1FNA | A | GLY | 37  | E | -4.276322  | 4.387441  | -9.188357  | -4.865228 |
| 1FNA | A | GLU | 38  | E | -3.119444  | 3.296257  | -7.740410  | -4.374601 |
| 1FNA | A | THR | 39  | T | -1.696907  | 2.532383  | -5.631973  | -3.834915 |
| 1FNA | A | GLY | 40  | T | -0.926630  | 1.662094  | -5.852899  | -3.996432 |
| 1FNA | A | GLY | 41  | T | -0.786753  | 1.970671  | -5.987261  | -4.063551 |
| 1FNA | A | ASN | 42  | C | -0.777632  | 2.001041  | -6.007061  | -4.062209 |
| 1FNA | A | SER | 43  | C | -0.792953  | 1.953000  | -5.905338  | -4.012896 |
| 1FNA | A | PRO | 44  | C | -0.987042  | 1.563921  | -5.416719  | -3.643980 |
| 1FNA | A | VAL | 45  | C | -1.885013  | 2.630504  | -4.551651  | -2.902737 |
| 1FNA | A | GLN | 46  | E | -3.359869  | 3.560772  | -5.932662  | -2.947762 |
| 1FNA | A | GLU | 47  | E | -5.232991  | 7.229392  | -9.962971  | -5.217084 |
| 1FNA | A | PHE | 48  | E | -6.027166  | 11.553381 | -9.285831  | -5.520610 |
| 1FNA | A | THR | 49  | E | -5.104707  | 8.726077  | -6.801740  | -3.642041 |
| 1FNA | A | VAL | 50  | E | -4.882413  | 7.495050  | -6.898316  | -3.272365 |
| 1FNA | A | PRO | 51  | E | -4.752436  | 7.114997  | -7.134869  | -3.267021 |
| 1FNA | A | GLY | 52  | T | -4.557238  | 7.053030  | -7.113670  | -3.337359 |
| 1FNA | A | SER | 53  | T | -4.563110  | 6.954500  | -7.156327  | -3.336998 |
| 1FNA | A | LYS | 54  | T | -4.750762  | 6.742246  | -7.557808  | -3.433091 |
| 1FNA | A | SER | 55  | C | -4.950659  | 7.228281  | -7.392993  | -3.476630 |
| 1FNA | A | THR | 56  | E | -5.098967  | 8.188181  | -7.011824  | -3.543235 |
| 1FNA | A | ALA | 57  | E | -5.070841  | 10.041717 | -5.718343  | -3.344307 |
| 1FNA | A | THR | 58  | E | -4.551098  | 10.893870 | -4.754096  | -3.442931 |
| 1FNA | A | ILE | 59  | E | -4.558246  | 10.916475 | -4.729628  | -3.444873 |
| 1FNA | A | SER | 60  | C | -4.522815  | 10.733820 | -4.942290  | -3.479747 |
| 1FNA | A | GLY | 61  | C | -4.404344  | 10.239530 | -5.338394  | -3.569469 |
| 1FNA | A | LEU | 62  | C | -4.556375  | 10.402845 | -5.394380  | -3.665359 |
| 1FNA | A | LYS | 63  | T | -5.073090  | 8.717260  | -7.459008  | -3.943920 |
| 1FNA | A | PRO | 64  | T | -5.126675  | 8.488524  | -7.486555  | -3.943384 |
| 1FNA | A | GLY | 65  | T | -5.255327  | 8.422240  | -7.331080  | -3.923359 |
| 1FNA | A | VAL | 66  | E | -6.410540  | 7.828526  | -9.459450  | -4.013260 |
| 1FNA | A | ASP | 67  | E | -6.702560  | 6.940870  | -10.334083 | -4.348615 |
| 1FNA | A | TYR | 68  | E | -9.250401  | 13.229006 | -10.723715 | -4.682425 |
| 1FNA | A | THR | 69  | E | -11.290315 | 14.238327 | -13.632573 | -4.774910 |
| 1FNA | A | ILE | 70  | E | -11.151013 | 17.585295 | -11.106266 | -4.377854 |
| 1FNA | A | THR | 71  | E | -10.930153 | 17.343799 | -10.950093 | -4.251587 |
| 1FNA | A | VAL | 72  | E | -10.652146 | 17.599867 | -10.435164 | -4.179939 |
| 1FNA | A | TYR | 73  | E | -10.001977 | 15.981820 | -10.546918 | -4.477901 |
| 1FNA | A | ALA | 74  | E | -8.632189  | 11.265733 | -11.647770 | -4.826097 |
| 1FNA | A | VAL | 75  | E | -6.774616  | 7.658013  | -10.763142 | -4.677290 |
| 1FNA | A | THR | 76  | T | -5.946787  | 6.037104  | -10.317941 | -4.434644 |
| 1FNA | A | GLY | 77  | T | -5.643712  | 5.297583  | -10.279955 | -4.221856 |
| 1FNA | A | ARG | 78  | T | -5.520956  | 4.795567  | -10.370757 | -4.059625 |
| 1FNA | A | GLY | 79  | T | -4.380718  | 2.123054  | -9.006397  | -3.449259 |
| 1FNA | A | ASP | 80  | T | -4.313847  | 2.226700  | -9.063587  | -3.454825 |

|      |   |     |    |   |            |           |            |           |
|------|---|-----|----|---|------------|-----------|------------|-----------|
| 1FNA | A | SER | 81 | T | -4.342107  | 2.065003  | -9.012306  | -3.409638 |
| 1FNA | A | PRO | 82 | T | -4.368350  | 1.969671  | -8.959412  | -3.386635 |
| 1FNA | A | ALA | 83 | T | -4.384336  | 1.952230  | -8.910202  | -3.387406 |
| 1FNA | A | SER | 84 | T | -5.548814  | 3.666780  | -9.739311  | -3.641392 |
| 1FNA | A | SER | 85 | T | -7.705699  | 5.612403  | -12.242895 | -3.630759 |
| 1FNA | A | LYS | 86 | C | -7.864191  | 7.184369  | -11.408940 | -3.502818 |
| 1FNA | A | PRO | 87 | C | -7.822154  | 9.960769  | -9.669102  | -3.376857 |
| 1FNA | A | ILE | 88 | E | -7.863873  | 10.198457 | -9.440896  | -3.356193 |
| 1FNA | A | SER | 89 | E | -7.878989  | 10.227077 | -9.343990  | -3.338619 |
| 1FNA | A | ILE | 90 | E | -8.020403  | 10.611642 | -8.821114  | -3.218323 |
| 1FNA | A | ASN | 91 | E | -8.217971  | 10.813841 | -8.594191  | -3.292782 |
| 1FNA | A | TYR | 92 | E | -10.210531 | 13.301455 | -10.752772 | -3.662195 |
| 1FNA | A | ARG | 93 | E | -7.387733  | 8.570063  | -7.720019  | -2.516009 |
| 1FNA | A | THR | 94 | E | -7.387733  | 8.570063  | -7.720019  | -2.516009 |
| 1FNA | A | GLU | 95 | C | -7.387733  | 8.570063  | -7.720019  | -2.516009 |
| 1FNA | A | ILE | 96 | C | -7.387733  | 8.570063  | -7.720019  | -2.516009 |
| 1FNL | A | GLU | 3  | C | -3.469823  | 0.683156  | -8.475379  | -3.212219 |
| 1FNL | A | ASP | 4  | C | -3.469823  | 0.683156  | -8.475379  | -3.212219 |
| 1FNL | A | LEU | 5  | C | -3.469823  | 0.683156  | -8.475379  | -3.212219 |
| 1FNL | A | PRO | 6  | C | -3.469823  | 0.683156  | -8.475379  | -3.212219 |
| 1FNL | A | LYS | 7  | C | -4.943915  | 2.750699  | -10.801686 | -4.405702 |
| 1FNL | A | ALA | 8  | C | -6.455665  | 4.838862  | -12.479461 | -5.053605 |
| 1FNL | A | VAL | 9  | E | -7.975199  | 7.251399  | -14.187283 | -5.537627 |
| 1FNL | A | VAL | 10 | E | -8.807243  | 12.626558 | -11.902690 | -4.723282 |
| 1FNL | A | PHE | 11 | E | -8.932749  | 13.712267 | -10.728038 | -4.173854 |
| 1FNL | A | LEU | 12 | E | -8.961429  | 14.015015 | -10.580710 | -4.196735 |
| 1FNL | A | GLU | 13 | E | -9.189475  | 14.136657 | -10.742396 | -4.314602 |
| 1FNL | A | PRO | 14 | T | -9.751888  | 14.186334 | -11.571972 | -4.431857 |
| 1FNL | A | GLN | 15 | T | -10.144968 | 13.664777 | -12.594888 | -4.831682 |
| 1FNL | A | TRP | 16 | T | -10.669201 | 15.226646 | -12.247348 | -5.067536 |
| 1FNL | A | TYR | 17 | T | -14.262180 | 18.109430 | -16.685754 | -5.489673 |
| 1FNL | A | SER | 18 | E | -12.206573 | 16.280787 | -14.019940 | -5.282448 |
| 1FNL | A | VAL | 19 | E | -11.746086 | 15.652730 | -14.177995 | -5.240429 |
| 1FNL | A | LEU | 20 | E | -11.517163 | 15.072147 | -14.566184 | -5.303126 |
| 1FNL | A | GLU | 21 | T | -11.204179 | 14.041620 | -14.780983 | -5.236163 |
| 1FNL | A | LYS | 22 | T | -10.880608 | 13.567603 | -14.594379 | -5.150047 |
| 1FNL | A | ASP | 23 | b | -10.878104 | 13.338186 | -14.624007 | -5.079875 |
| 1FNL | A | SER | 24 | C | -10.583184 | 13.915784 | -13.636557 | -4.911167 |
| 1FNL | A | VAL | 25 | E | -10.383076 | 14.023549 | -13.452207 | -4.967820 |
| 1FNL | A | THR | 26 | E | -10.157552 | 13.314444 | -13.830199 | -5.203364 |
| 1FNL | A | LEU | 27 | E | -8.587650  | 10.636844 | -12.833044 | -5.552304 |
| 1FNL | A | LYS | 28 | E | -7.574948  | 7.678888  | -13.208218 | -5.519664 |
| 1FNL | A | CYS | 29 | E | -7.353082  | 8.373896  | -12.930887 | -5.548937 |
| 1FNL | A | GLN | 30 | E | -7.337173  | 8.416252  | -12.953124 | -5.546439 |
| 1FNL | A | GLY | 31 | C | -7.220043  | 8.409035  | -12.869719 | -5.439010 |
| 1FNL | A | ALA | 32 | C | -7.198037  | 8.119180  | -12.870553 | -5.323661 |
| 1FNL | A | TYR | 33 | C | -7.453979  | 8.706604  | -12.744177 | -5.174451 |
| 1FNL | A | SER | 34 | B | -6.039924  | 3.187350  | -12.479188 | -4.797849 |
| 1FNL | A | PRO | 35 | T | -5.924478  | 3.358755  | -12.570405 | -4.816240 |
| 1FNL | A | GLU | 36 | T | -5.935375  | 3.260808  | -12.578750 | -4.814846 |
| 1FNL | A | ASP | 37 | B | -5.944319  | 3.195253  | -12.575362 | -4.817795 |
| 1FNL | A | ASN | 38 | C | -5.950272  | 3.156680  | -12.560124 | -4.814529 |
| 1FNL | A | SER | 39 | C | -6.934274  | 4.275348  | -13.039236 | -4.916476 |
| 1FNL | A | THR | 40 | C | -9.539470  | 6.756544  | -15.835225 | -5.504632 |
| 1FNL | A | GLN | 41 | E | -12.477632 | 8.852918  | -18.973482 | -5.820733 |
| 1FNL | A | TRP | 42 | E | -13.994619 | 15.624033 | -17.802174 | -5.835312 |
| 1FNL | A | PHE | 43 | E | -10.298000 | 9.710450  | -14.512018 | -4.943727 |
| 1FNL | A | HIS | 44 | E | -7.998092  | 7.660777  | -12.446052 | -4.755727 |
| 1FNL | A | ASN | 45 | T | -7.107712  | 7.727027  | -11.282043 | -4.502924 |
| 1FNL | A | GLU | 46 | T | -7.049772  | 7.823891  | -11.333004 | -4.487005 |
| 1FNL | A | SER | 47 | E | -6.984174  | 7.944914  | -11.327354 | -4.448091 |
| 1FNL | A | LEU | 48 | E | -6.960531  | 8.016345  | -11.349374 | -4.451839 |
| 1FNL | A | ILE | 49 | E | -7.064431  | 8.099096  | -11.164158 | -4.391013 |
| 1FNL | A | SER | 50 | E | -7.819411  | 8.995168  | -11.764061 | -4.290227 |
| 1FNL | A | SER | 51 | C | -8.038202  | 8.962376  | -11.909914 | -4.286318 |
| 1FNL | A | GLN | 52 | C | -8.604412  | 8.951753  | -12.977298 | -4.571004 |
| 1FNL | A | ALA | 53 | C | -9.262955  | 7.417112  | -14.832571 | -4.579709 |
| 1FNL | A | SER | 54 | C | -9.588678  | 7.123756  | -15.457768 | -4.697711 |
| 1FNL | A | SER | 55 | E | -9.479465  | 9.410486  | -14.356777 | -4.853070 |
| 1FNL | A | TYR | 56 | E | -8.614847  | 13.635956 | -10.428335 | -4.812204 |
| 1FNL | A | PHE | 57 | E | -7.854240  | 11.878125 | -10.003887 | -4.372630 |
| 1FNL | A | ILE | 58 | E | -7.473884  | 10.421705 | -10.266416 | -4.152958 |
| 1FNL | A | ASP | 59 | T | -7.104853  | 8.895239  | -10.579384 | -4.023565 |
| 1FNL | A | ALA | 60 | T | -6.752628  | 7.610909  | -10.730368 | -3.903778 |
| 1FNL | A | ALA | 61 | b | -6.589147  | 7.157665  | -10.914536 | -3.946868 |
| 1FNL | A | THR | 62 | C | -6.575766  | 6.673411  | -11.200739 | -3.972839 |
| 1FNL | A | VAL | 63 | G | -6.620328  | 6.379056  | -11.383932 | -4.005603 |
| 1FNL | A | ASN | 64 | G | -6.756068  | 6.183206  | -11.498479 | -4.039450 |
| 1FNL | A | ASP | 65 | G | -7.114454  | 6.265110  | -11.974600 | -4.266907 |
| 1FNL | A | SER | 66 | C | -7.746959  | 5.649355  | -13.175167 | -4.475432 |
| 1FNL | A | GLY | 67 | E | -8.612115  | 5.161033  | -14.476972 | -4.732992 |



|      |   |     |     |   |            |           |            |           |
|------|---|-----|-----|---|------------|-----------|------------|-----------|
| 1FNL | A | GLU | 68  | E | -11.876786 | 6.923297  | -18.842932 | -5.571202 |
| 1FNL | A | TYR | 69  | E | -14.912473 | 14.362835 | -20.315408 | -6.079022 |
| 1FNL | A | ARG | 70  | E | -14.426725 | 12.238450 | -20.876777 | -6.325112 |
| 1FNL | A | CYS | 71  | E | -11.744924 | 9.702346  | -17.700447 | -5.943214 |
| 1FNL | A | GLN | 72  | E | -11.380746 | 10.223974 | -17.452125 | -5.917763 |
| 1FNL | A | THR | 73  | T | -10.097866 | 9.612803  | -15.095068 | -5.279450 |
| 1FNL | A | ASN | 74  | T | -9.880218  | 9.634057  | -15.107470 | -5.234778 |
| 1FNL | A | LEU | 75  | T | -9.831166  | 9.674881  | -15.149232 | -5.215143 |
| 1FNL | A | SER | 76  | T | -9.824756  | 9.631646  | -15.152357 | -5.193818 |
| 1FNL | A | THR | 77  | C | -9.305861  | 9.155315  | -14.531584 | -5.066635 |
| 1FNL | A | LEU | 78  | C | -9.263162  | 9.117796  | -14.332962 | -4.933007 |
| 1FNL | A | SER | 79  | C | -9.242716  | 9.023419  | -14.359515 | -4.917854 |
| 1FNL | A | ASP | 80  | C | -9.109648  | 9.614490  | -13.934534 | -4.850127 |
| 1FNL | A | PRO | 81  | C | -9.100924  | 9.720469  | -13.878318 | -4.837190 |
| 1FNL | A | VAL | 82  | E | -9.415460  | 10.416688 | -13.675705 | -4.720532 |
| 1FNL | A | GLN | 83  | E | -9.686313  | 11.079671 | -13.477783 | -4.736608 |
| 1FNL | A | LEU | 84  | E | -9.380867  | 13.275299 | -11.750464 | -4.647469 |
| 1FNL | A | GLU | 85  | E | -7.743563  | 10.059498 | -10.878540 | -4.724540 |
| 1FNL | A | VAL | 86  | E | -7.243454  | 11.441548 | -9.786654  | -4.606031 |
| 1FNL | A | HIS | 87  | E | -6.972906  | 12.320947 | -9.346969  | -4.666391 |
| 1FNL | A | ILE | 88  | C | -6.711428  | 13.598407 | -8.518838  | -4.653861 |
| 1FNL | A | GLY | 89  | C | -6.713570  | 13.607979 | -8.507167  | -4.655182 |
| 1FNL | A | TRP | 90  | C | -6.823003  | 14.362578 | -8.029545  | -4.640544 |
| 1FNL | A | LEU | 91  | E | -7.018442  | 15.096431 | -7.660729  | -4.688833 |
| 1FNL | A | LEU | 92  | E | -7.317344  | 15.920441 | -7.050095  | -4.635151 |
| 1FNL | A | LEU | 93  | E | -10.192050 | 18.417037 | -10.073138 | -5.130405 |
| 1FNL | A | GLN | 94  | E | -12.638886 | 16.729662 | -15.065359 | -5.072999 |
| 1FNL | A | ALA | 95  | T | -9.129716  | 14.021303 | -9.332035  | -3.856579 |
| 1FNL | A | PRO | 96  | T | -9.024365  | 14.209359 | -9.491708  | -3.902939 |
| 1FNL | A | ARG | 97  | T | -8.968212  | 14.207015 | -9.683063  | -3.950891 |
| 1FNL | A | TRP | 98  | T | -8.965854  | 14.215086 | -9.699711  | -3.957039 |
| 1FNL | A | VAL | 99  | E | -8.953686  | 14.198662 | -9.792085  | -3.985707 |
| 1FNL | A | PHE | 100 | E | -9.664935  | 14.445557 | -11.581517 | -4.514249 |
| 1FNL | A | LYS | 101 | E | -8.190244  | 7.874913  | -12.749130 | -4.800775 |
| 1FNL | A | GLU | 102 | T | -8.120768  | 8.065922  | -12.777922 | -4.812516 |
| 1FNL | A | GLU | 103 | T | -8.076254  | 8.300169  | -12.758510 | -4.808644 |
| 1FNL | A | ASP | 104 | b | -8.070080  | 8.366105  | -12.737691 | -4.801437 |
| 1FNL | A | PRO | 105 | C | -8.075504  | 8.327272  | -12.723841 | -4.795307 |
| 1FNL | A | ILE | 106 | E | -8.995872  | 11.000310 | -12.629877 | -4.784488 |
| 1FNL | A | HIS | 107 | E | -9.509182  | 11.893103 | -12.421675 | -4.722404 |
| 1FNL | A | LEU | 108 | E | -10.540277 | 14.339415 | -11.908345 | -4.508256 |
| 1FNL | A | ARG | 109 | E | -12.703032 | 16.244661 | -14.185037 | -4.786806 |
| 1FNL | A | CYS | 110 | E | -14.108940 | 14.477527 | -19.007107 | -5.819592 |
| 1FNL | A | HIS | 111 | E | -10.932786 | 11.904175 | -15.387952 | -5.887520 |
| 1FNL | A | SER | 112 | E | -7.557729  | 10.869622 | -10.935071 | -5.371240 |
| 1FNL | A | TRP | 113 | T | -6.083423  | 10.115352 | -9.281231  | -5.096188 |
| 1FNL | A | LYS | 114 | T | -5.339323  | 9.927604  | -8.467716  | -4.907666 |
| 1FNL | A | ASN | 115 | T | -5.310151  | 9.930159  | -8.537869  | -4.897622 |
| 1FNL | A | THR | 116 | T | -5.309919  | 9.931224  | -8.539134  | -4.897534 |
| 1FNL | A | ALA | 117 | C | -5.323256  | 9.910313  | -8.485104  | -4.886580 |
| 1FNL | A | LEU | 118 | E | -5.497025  | 9.863336  | -8.264453  | -4.823324 |
| 1FNL | A | HIS | 119 | E | -7.100551  | 10.018337 | -9.959027  | -4.697985 |
| 1FNL | A | LYS | 120 | E | -9.630384  | 12.876006 | -12.311570 | -4.740556 |
| 1FNL | A | VAL | 121 | E | -10.316380 | 13.647688 | -12.239019 | -4.464211 |
| 1FNL | A | THR | 122 | E | -11.405747 | 16.017813 | -12.883450 | -4.893436 |
| 1FNL | A | TYR | 123 | E | -12.479099 | 17.283010 | -14.861357 | -5.503580 |
| 1FNL | A | LEU | 124 | E | -8.175244  | 7.308148  | -13.502509 | -5.310937 |
| 1FNL | A | GLN | 125 | E | -6.000164  | 5.169983  | -12.154160 | -5.499005 |
| 1FNL | A | ASN | 126 | T | -5.880929  | 5.292029  | -12.213462 | -5.445595 |
| 1FNL | A | GLY | 127 | T | -5.820069  | 5.573835  | -12.155198 | -5.418861 |
| 1FNL | A | LYS | 128 | E | -5.818204  | 5.590241  | -12.158065 | -5.418618 |
| 1FNL | A | ASP | 129 | E | -5.829368  | 5.557964  | -12.132545 | -5.420676 |
| 1FNL | A | ARG | 130 | E | -6.606220  | 6.760560  | -12.168641 | -5.194689 |
| 1FNL | A | LYS | 131 | E | -7.174151  | 8.306119  | -11.672489 | -5.177596 |
| 1FNL | A | TYR | 132 | E | -9.068080  | 11.344798 | -13.052869 | -5.332380 |
| 1FNL | A | PHE | 133 | E | -9.820585  | 12.622655 | -13.341422 | -5.266480 |
| 1FNL | A | HIS | 134 | E | -9.311032  | 9.725630  | -14.343267 | -5.267418 |
| 1FNL | A | HIS | 135 | E | -9.311638  | 9.710146  | -14.347952 | -5.266905 |
| 1FNL | A | ASN | 136 | T | -9.541394  | 8.137766  | -15.150487 | -5.273398 |
| 1FNL | A | SER | 137 | C | -9.544654  | 8.150891  | -15.119669 | -5.262999 |
| 1FNL | A | ASP | 138 | E | -9.421272  | 9.433620  | -14.338880 | -5.161070 |
| 1FNL | A | PHE | 139 | E | -8.030167  | 13.127722 | -9.349489  | -4.534538 |
| 1FNL | A | HIS | 140 | E | -6.617103  | 10.299913 | -8.433662  | -3.973138 |
| 1FNL | A | ILE | 141 | E | -6.555599  | 10.157523 | -8.635974  | -3.961591 |
| 1FNL | A | PRO | 142 | T | -6.520434  | 10.039356 | -8.795820  | -3.962282 |
| 1FNL | A | LYS | 143 | T | -6.388923  | 9.365616  | -9.265707  | -3.985052 |
| 1FNL | A | ALA | 144 | b | -6.406464  | 9.022158  | -9.394654  | -3.961790 |
| 1FNL | A | THR | 145 | C | -6.987916  | 7.227218  | -11.342191 | -4.056362 |
| 1FNL | A | LEU | 146 | G | -7.117229  | 6.782561  | -11.615198 | -4.116181 |
| 1FNL | A | LYS | 147 | G | -7.218917  | 6.531030  | -11.656071 | -4.143010 |
| 1FNL | A | ASP | 148 | G | -8.216161  | 5.755762  | -13.811539 | -4.409316 |

|      |   |     |     |   |            |           |            |           |
|------|---|-----|-----|---|------------|-----------|------------|-----------|
| 1FNL | A | SER | 149 | C | -8.917791  | 5.057621  | -15.205831 | -4.633357 |
| 1FNL | A | GLY | 150 | E | -9.786913  | 4.483224  | -16.667854 | -4.918309 |
| 1FNL | A | SER | 151 | E | -11.834122 | 4.585693  | -19.575014 | -5.204114 |
| 1FNL | A | TYR | 152 | E | -14.315322 | 15.097674 | -19.115531 | -5.906520 |
| 1FNL | A | PHE | 153 | E | -13.113648 | 14.156482 | -16.946145 | -5.534442 |
| 1FNL | A | CYS | 154 | E | -11.621139 | 12.716582 | -16.804012 | -6.099743 |
| 1FNL | A | ARG | 155 | E | -9.722968  | 11.720707 | -14.306634 | -5.718196 |
| 1FNL | A | GLY | 156 | E | -7.548190  | 7.175978  | -11.406811 | -4.149620 |
| 1FNL | A | LEU | 157 | E | -6.241187  | 7.959224  | -9.337928  | -4.054684 |
| 1FNL | A | VAL | 158 | E | -3.873342  | 7.194925  | -6.515841  | -4.082142 |
| 1FNL | A | GLY | 159 | T | -3.823323  | 7.146579  | -6.685396  | -4.081669 |
| 1FNL | A | SER | 160 | T | -3.810158  | 7.172151  | -6.727173  | -4.079970 |
| 1FNL | A | LYS | 161 | E | -3.810794  | 7.174005  | -6.722410  | -4.080387 |
| 1FNL | A | ASN | 162 | E | -3.819230  | 7.160993  | -6.690329  | -4.081134 |
| 1FNL | A | VAL | 163 | E | -5.151555  | 7.018967  | -8.666716  | -4.068414 |
| 1FNL | A | SER | 164 | E | -5.989352  | 8.419518  | -8.943152  | -4.086215 |
| 1FNL | A | SER | 165 | C | -7.066852  | 8.979884  | -11.542697 | -4.698951 |
| 1FNL | A | GLU | 166 | C | -6.917693  | 9.489440  | -10.882787 | -4.575852 |
| 1FNL | A | THR | 167 | C | -6.556256  | 10.761846 | -9.417236  | -4.412219 |
| 1FNL | A | VAL | 168 | E | -6.669910  | 11.001406 | -9.142820  | -4.357185 |
| 1FNL | A | ASN | 169 | E | -6.678235  | 11.158444 | -9.087608  | -4.391326 |
| 1FNL | A | ILE | 170 | E | -6.648438  | 11.762735 | -8.891394  | -4.482303 |
| 1FNL | A | THR | 171 | E | -5.713665  | 9.417596  | -8.516643  | -4.450159 |
| 1FNL | A | ILE | 172 | E | -4.820640  | 7.932375  | -7.324932  | -3.808434 |
| 1FNL | A | THR | 173 | E | -4.820640  | 7.932375  | -7.324932  | -3.808434 |
| 1FNL | A | GLN | 174 | C | -4.820640  | 7.932375  | -7.324932  | -3.808434 |
| 1FNL | A | ALA | 175 | C | -4.820640  | 7.932375  | -7.324932  | -3.808434 |
| 1FP5 | A | VAL | 336 | I | -9.523826  | 9.219287  | -11.109340 | -2.985913 |
| 1FP5 | A | SER | 337 | C | -9.523826  | 9.219287  | -11.109340 | -2.985913 |
| 1FP5 | A | ALA | 338 | E | -9.523826  | 9.219287  | -11.109340 | -2.985913 |
| 1FP5 | A | TYR | 339 | E | -9.523826  | 9.219287  | -11.109340 | -2.985913 |
| 1FP5 | A | LEU | 340 | E | -10.924458 | 13.204723 | -12.452145 | -4.122912 |
| 1FP5 | A | SER | 341 | E | -12.061885 | 12.009157 | -14.928881 | -4.247085 |
| 1FP5 | A | ARG | 342 | E | -12.081434 | 11.991723 | -14.877489 | -4.229922 |
| 1FP5 | A | PRO | 343 | C | -11.760226 | 12.474875 | -14.604090 | -4.307429 |
| 1FP5 | A | SER | 344 | C | -11.706635 | 12.728021 | -14.598951 | -4.344665 |
| 1FP5 | A | PRO | 345 | C | -11.946445 | 13.437390 | -14.578268 | -4.431573 |
| 1FP5 | A | PHE | 346 | H | -12.032526 | 14.423507 | -14.300071 | -4.611479 |
| 1FP5 | A | ASP | 347 | H | -11.519934 | 15.551394 | -13.252499 | -4.736377 |
| 1FP5 | A | LEU | 348 | H | -9.146037  | 14.671142 | -9.204868  | -4.225572 |
| 1FP5 | A | PHE | 349 | H | -8.190826  | 11.966772 | -9.354195  | -3.962851 |
| 1FP5 | A | ILE | 350 | H | -7.931153  | 10.690051 | -9.734867  | -3.717850 |
| 1FP5 | A | ARG | 351 | H | -7.896339  | 10.564366 | -9.893320  | -3.721987 |
| 1FP5 | A | LYS | 352 | C | -7.893291  | 10.557357 | -9.910733  | -3.721668 |
| 1FP5 | A | SER | 353 | C | -7.956694  | 10.050934 | -10.043786 | -3.662403 |
| 1FP5 | A | PRO | 354 | C | -8.360788  | 8.972677  | -10.815500 | -3.462599 |
| 1FP5 | A | THR | 355 | C | -8.977852  | 11.159364 | -11.767864 | -4.131883 |
| 1FP5 | A | ILE | 356 | E | -9.188274  | 12.688292 | -11.401400 | -4.313675 |
| 1FP5 | A | THR | 357 | E | -9.186509  | 12.764559 | -11.383025 | -4.330435 |
| 1FP5 | A | CYS | 358 | E | -9.284829  | 12.832834 | -11.358972 | -4.382081 |
| 1FP5 | A | LEU | 359 | E | -9.601539  | 12.807922 | -11.722572 | -4.476936 |
| 1FP5 | A | VAL | 360 | E | -10.022051 | 11.543877 | -12.647581 | -3.977556 |
| 1FP5 | A | VAL | 361 | E | -8.951941  | 8.709413  | -11.843960 | -3.673562 |
| 1FP5 | A | ASP | 362 | E | -8.402932  | 7.598849  | -12.448562 | -3.957969 |
| 1FP5 | A | LEU | 363 | E | -5.475133  | 3.866402  | -8.633823  | -3.031497 |
| 1FP5 | A | ALA | 364 | T | -3.415507  | 3.949625  | -6.356614  | -3.356848 |
| 1FP5 | A | PRO | 365 | T | -2.903016  | 3.898232  | -6.231233  | -3.380661 |
| 1FP5 | A | SER | 366 | T | -2.885852  | 3.942865  | -6.288036  | -3.391664 |
| 1FP5 | A | LYS | 367 | C | -2.823318  | 3.996097  | -6.412513  | -3.418936 |
| 1FP5 | A | GLY | 368 | C | -2.829747  | 4.000713  | -6.388094  | -3.423456 |
| 1FP5 | A | THR | 369 | C | -3.098221  | 4.004490  | -6.409610  | -3.434996 |
| 1FP5 | A | VAL | 370 | C | -4.056357  | 4.644683  | -7.593998  | -3.638282 |
| 1FP5 | A | ASN | 371 | C | -4.191118  | 4.448038  | -7.453283  | -3.616893 |
| 1FP5 | A | LEU | 372 | E | -7.125931  | 9.001323  | -9.626233  | -4.221916 |
| 1FP5 | A | THR | 373 | E | -9.441082  | 9.789902  | -12.469381 | -4.363064 |
| 1FP5 | A | TRP | 374 | E | -11.458957 | 14.239960 | -14.559944 | -5.304287 |
| 1FP5 | A | SER | 375 | E | -9.358414  | 7.675506  | -16.103396 | -6.133565 |
| 1FP5 | A | ARG | 376 | E | -7.317586  | 7.307900  | -12.913476 | -5.547779 |
| 1FP5 | A | ALA | 377 | E | -4.635601  | 3.256435  | -9.502173  | -4.242748 |
| 1FP5 | A | SER | 378 | T | -4.515887  | 3.445368  | -9.571325  | -4.229526 |
| 1FP5 | A | GLY | 379 | T | -4.257856  | 3.931412  | -9.279472  | -4.215868 |
| 1FP5 | A | LYS | 380 | T | -4.052500  | 4.191777  | -8.908923  | -4.066698 |
| 1FP5 | A | PRO | 381 | C | -3.504533  | 4.999357  | -7.391988  | -3.794224 |
| 1FP5 | A | VAL | 382 | C | -3.476238  | 5.618540  | -6.963226  | -3.725766 |
| 1FP5 | A | ASN | 383 | C | -3.494904  | 5.662071  | -6.870403  | -3.711152 |
| 1FP5 | A | HIS | 384 | C | -3.555627  | 5.750252  | -6.667336  | -3.657916 |
| 1FP5 | A | SER | 385 | C | -3.635910  | 5.883167  | -6.470948  | -3.649693 |
| 1FP5 | A | THR | 386 | C | -4.467129  | 6.958210  | -6.695965  | -3.756111 |
| 1FP5 | A | ARG | 387 | E | -7.278437  | 6.624827  | -12.438017 | -4.531823 |
| 1FP5 | A | LYS | 388 | E | -7.471672  | 6.887513  | -13.301692 | -4.972657 |
| 1FP5 | A | GLU | 389 | E | -5.807584  | 6.552246  | -10.186597 | -4.750496 |

|      |   |     |     |   |            |           |            |           |
|------|---|-----|-----|---|------------|-----------|------------|-----------|
| 1FP5 | A | GLU | 390 | E | -4.150542  | 3.836110  | -8.092596  | -3.844323 |
| 1FP5 | A | LYS | 391 | E | -2.916544  | 2.877104  | -7.443102  | -3.997527 |
| 1FP5 | A | GLN | 392 | E | -2.347910  | 3.056446  | -6.660212  | -3.775086 |
| 1FP5 | A | ARG | 393 | E | -2.345651  | 3.073528  | -6.664757  | -3.774883 |
| 1FP5 | A | ASN | 394 | T | -2.347104  | 3.067054  | -6.656861  | -3.773345 |
| 1FP5 | A | GLY | 395 | T | -2.375238  | 3.033306  | -6.582336  | -3.766389 |
| 1FP5 | A | THR | 396 | T | -2.638473  | 3.159885  | -6.081700  | -3.582346 |
| 1FP5 | A | LEU | 397 | E | -5.590946  | 7.924502  | -8.217294  | -4.027767 |
| 1FP5 | A | THR | 398 | E | -6.887481  | 11.812240 | -12.423661 | -7.349100 |
| 1FP5 | A | VAL | 399 | E | -8.241652  | 13.564812 | -13.064548 | -7.387510 |
| 1FP5 | A | THR | 400 | E | -9.674332  | 14.169037 | -11.665059 | -4.701548 |
| 1FP5 | A | SER | 401 | E | -10.318814 | 13.723857 | -13.115431 | -4.813771 |
| 1FP5 | A | THR | 402 | E | -9.417192  | 13.016354 | -11.713359 | -4.678849 |
| 1FP5 | A | LEU | 403 | E | -8.903011  | 12.206100 | -10.734878 | -4.113449 |
| 1FP5 | A | PRO | 404 | E | -8.866037  | 11.949641 | -10.915397 | -4.100758 |
| 1FP5 | A | VAL | 405 | E | -8.778446  | 11.346766 | -11.342894 | -4.157239 |
| 1FP5 | A | GLY | 406 | C | -8.783233  | 11.318787 | -11.338668 | -4.156739 |
| 1FP5 | A | THR | 407 | C | -8.983861  | 10.677542 | -11.316489 | -3.960634 |
| 1FP5 | A | ARG | 408 | H | -9.648572  | 8.614960  | -13.922225 | -4.435668 |
| 1FP5 | A | ASP | 409 | H | -8.351700  | 11.623539 | -10.531585 | -4.690863 |
| 1FP5 | A | TRP | 410 | H | -8.062219  | 12.135065 | -10.378243 | -4.832251 |
| 1FP5 | A | ILE | 411 | H | -6.216580  | 8.828482  | -9.649506  | -4.955247 |
| 1FP5 | A | GLU | 412 | H | -6.215628  | 8.835905  | -9.654818  | -4.956606 |
| 1FP5 | A | GLY | 413 | H | -6.215758  | 8.835345  | -9.653907  | -4.956690 |
| 1FP5 | A | GLU | 414 | C | -6.230706  | 8.757005  | -9.639586  | -4.963222 |
| 1FP5 | A | THR | 415 | C | -6.242436  | 8.683287  | -9.621706  | -4.962403 |
| 1FP5 | A | TYR | 416 | E | -10.015319 | 13.470019 | -13.016045 | -5.792678 |
| 1FP5 | A | GLN | 417 | E | -12.804332 | 14.580263 | -17.005119 | -6.206086 |
| 1FP5 | A | CYS | 418 | E | -13.260649 | 12.321527 | -17.753629 | -5.137770 |
| 1FP5 | A | ARG | 419 | E | -12.163813 | 14.356429 | -15.323219 | -5.214992 |
| 1FP5 | A | VAL | 420 | E | -9.027058  | 11.931743 | -11.039502 | -4.469259 |
| 1FP5 | A | THR | 421 | E | -7.589174  | 11.029926 | -9.568730  | -4.312834 |
| 1FP5 | A | HIS | 422 | E | -5.617082  | 8.979953  | -7.159716  | -3.732389 |
| 1FP5 | A | PRO | 423 | T | -3.527934  | 6.939705  | -4.547178  | -3.030643 |
| 1FP5 | A | HIS | 424 | T | -3.346846  | 6.855165  | -4.819465  | -3.070180 |
| 1FP5 | A | LEU | 425 | T | -3.342670  | 6.863403  | -4.836994  | -3.069594 |
| 1FP5 | A | PRO | 426 | T | -3.340516  | 6.865391  | -4.850017  | -3.070751 |
| 1FP5 | A | ARG | 427 | C | -3.352960  | 6.821169  | -4.802332  | -3.056714 |
| 1FP5 | A | ALA | 428 | C | -4.114978  | 6.643024  | -5.652590  | -3.166299 |
| 1FP5 | A | LEU | 429 | C | -5.992844  | 8.005176  | -7.807673  | -3.189073 |
| 1FP5 | A | MET | 430 | E | -6.554878  | 8.034185  | -8.628134  | -3.542568 |
| 1FP5 | A | ARG | 431 | E | -8.754750  | 11.941640 | -11.714859 | -4.642433 |
| 1FP5 | A | SER | 432 | E | -8.303297  | 11.653464 | -11.679867 | -5.185989 |
| 1FP5 | A | THR | 433 | E | -7.989449  | 10.844080 | -11.609570 | -5.040490 |
| 1FP5 | A | THR | 434 | E | -6.747043  | 7.876202  | -10.654512 | -4.751815 |
| 1FP5 | A | LYS | 435 | E | -6.202212  | 6.343564  | -10.758461 | -4.548374 |
| 1FP5 | A | THR | 436 | C | -5.642917  | 6.497298  | -9.740267  | -4.223889 |
| 1FP5 | A | SER | 437 | C | -5.596508  | 6.398246  | -9.800368  | -4.175999 |
| 1FP5 | A | GLY | 438 | C | -5.580469  | 6.387266  | -9.815577  | -4.156492 |
| 1FP5 | A | PRO | 439 | C | -5.657140  | 6.241374  | -9.717586  | -4.077446 |
| 1FP5 | A | ARG | 440 | C | -5.821365  | 6.510254  | -9.361225  | -3.968120 |
| 1FP5 | A | ALA | 441 | C | -6.855724  | 6.107031  | -10.635593 | -3.731657 |
| 1FP5 | A | ALA | 442 | B | -7.547707  | 7.048774  | -10.663923 | -3.740639 |
| 1FP5 | A | PRO | 443 | C | -9.284833  | 10.567436 | -11.102613 | -3.401805 |
| 1FP5 | A | GLU | 444 | C | -9.972530  | 11.577922 | -12.029799 | -3.807039 |
| 1FP5 | A | VAL | 445 | E | -9.977435  | 11.735702 | -11.946640 | -3.813383 |
| 1FP5 | A | TYR | 446 | E | -10.587884 | 14.206184 | -13.116888 | -4.815087 |
| 1FP5 | A | ALA | 447 | E | -8.696132  | 12.051235 | -11.978556 | -5.321345 |
| 1FP5 | A | PHE | 448 | E | -8.274320  | 11.554439 | -12.232617 | -5.404387 |
| 1FP5 | A | ALA | 449 | E | -5.273896  | 6.895558  | -7.935439  | -3.918868 |
| 1FP5 | A | THR | 450 | E | -3.894541  | 4.436057  | -7.279972  | -3.645224 |
| 1FP5 | A | PRO | 451 | E | -1.991443  | 2.877876  | -6.012580  | -3.939223 |
| 1FP5 | A | GLU | 452 | C | -1.819334  | 3.101003  | -6.239933  | -4.038944 |
| 1FP5 | A | TRP | 453 | C | -1.731142  | 2.908716  | -6.478031  | -4.035703 |
| 1FP5 | A | PRO | 454 | C | -1.730638  | 2.896242  | -6.489143  | -4.037235 |
| 1FP5 | A | GLY | 455 | C | -1.745731  | 2.856321  | -6.458708  | -4.039604 |
| 1FP5 | A | SER | 456 | C | -2.377241  | 2.770627  | -6.964050  | -3.951305 |
| 1FP5 | A | ARG | 457 | C | -2.938406  | 1.479261  | -7.518934  | -3.685733 |
| 1FP5 | A | ASP | 458 | C | -5.002279  | 2.840297  | -10.988713 | -4.590297 |
| 1FP5 | A | LYS | 459 | C | -6.017298  | 4.636829  | -13.322973 | -6.071719 |
| 1FP5 | A | ARG | 460 | C | -7.959951  | 8.047620  | -16.756232 | -8.314409 |
| 1FP5 | A | THR | 461 | E | -10.184228 | 11.059845 | -18.961168 | -8.874870 |
| 1FP5 | A | LEU | 462 | E | -10.944301 | 14.770627 | -13.619052 | -5.187221 |
| 1FP5 | A | ALA | 463 | E | -10.811910 | 13.711770 | -12.663336 | -4.288936 |
| 1FP5 | A | CYS | 464 | E | -10.529649 | 12.801142 | -13.211697 | -4.492698 |
| 1FP5 | A | LEU | 465 | E | -10.503428 | 12.964616 | -13.178640 | -4.497280 |
| 1FP5 | A | ILE | 466 | E | -10.524147 | 12.943197 | -13.146278 | -4.495021 |
| 1FP5 | A | GLN | 467 | E | -10.700700 | 12.196340 | -13.695940 | -4.632464 |
| 1FP5 | A | ASN | 468 | E | -11.001668 | 12.131587 | -14.040337 | -4.841207 |
| 1FP5 | A | PHE | 469 | E | -12.099745 | 16.467654 | -13.516888 | -4.826798 |
| 1FP5 | A | MET | 470 | E | -11.047667 | 14.185359 | -12.708297 | -4.759426 |

|      |   |     |     |   |            |           |            |           |
|------|---|-----|-----|---|------------|-----------|------------|-----------|
| 1FP5 | A | PRO | 471 | B | -10.632714 | 13.556784 | -13.053700 | -4.833914 |
| 1FP5 | A | GLU | 472 | T | -10.287428 | 13.571454 | -12.894692 | -4.858438 |
| 1FP5 | A | ASP | 473 | T | -10.271009 | 13.565174 | -12.955097 | -4.868174 |
| 1FP5 | A | ILE | 474 | C | -10.269950 | 13.578134 | -12.955390 | -4.870042 |
| 1FP5 | A | SER | 475 | C | -10.445082 | 13.415135 | -13.083565 | -4.916170 |
| 1FP5 | A | VAL | 476 | E | -10.723833 | 13.643666 | -12.883640 | -4.917864 |
| 1FP5 | A | GLN | 477 | E | -12.284190 | 14.111608 | -15.112324 | -5.260343 |
| 1FP5 | A | TRP | 478 | E | -12.504456 | 16.264451 | -14.403115 | -5.293237 |
| 1FP5 | A | LEU | 479 | E | -7.398731  | 8.116076  | -10.400688 | -4.302363 |
| 1FP5 | A | HIS | 480 | E | -6.421909  | 6.522236  | -10.781191 | -4.625626 |
| 1FP5 | A | ASN | 481 | E | -6.401657  | 6.572310  | -10.837935 | -4.629375 |
| 1FP5 | A | GLU | 482 | T | -5.963113  | 6.903861  | -10.061354 | -4.347068 |
| 1FP5 | A | VAL | 483 | T | -5.938200  | 6.913948  | -10.115284 | -4.340871 |
| 1FP5 | A | GLN | 484 | E | -5.920954  | 6.823259  | -10.151022 | -4.329644 |
| 1FP5 | A | LEU | 485 | E | -6.152018  | 7.152253  | -9.835212  | -4.119506 |
| 1FP5 | A | PRO | 486 | C | -6.149786  | 7.124670  | -9.841161  | -4.108544 |
| 1FP5 | A | ASP | 487 | C | -6.896318  | 6.919258  | -11.081005 | -4.157088 |
| 1FP5 | A | ALA | 488 | G | -7.033938  | 6.859428  | -11.006489 | -4.146882 |
| 1FP5 | A | ARG | 489 | G | -7.805083  | 6.510644  | -11.966418 | -3.974882 |
| 1FP5 | A | HIS | 490 | G | -8.154397  | 7.181992  | -12.347428 | -4.225924 |
| 1FP5 | A | SER | 491 | E | -6.622143  | 8.280362  | -8.953475  | -3.808689 |
| 1FP5 | A | THR | 492 | E | -5.626283  | 8.435430  | -7.373353  | -3.451939 |
| 1FP5 | A | THR | 493 | E | -5.180016  | 8.241125  | -7.131951  | -3.367353 |
| 1FP5 | A | GLN | 494 | C | -5.108265  | 8.317355  | -7.171100  | -3.362583 |
| 1FP5 | A | PRO | 495 | C | -4.916071  | 8.295046  | -7.053310  | -3.326805 |
| 1FP5 | A | ARG | 496 | C | -3.150585  | 4.478042  | -6.367065  | -3.666620 |
| 1FP5 | A | LYS | 497 | E | -2.796471  | 3.585323  | -6.948289  | -3.788843 |
| 1FP5 | A | THR | 498 | E | -2.539742  | 3.024392  | -7.327946  | -3.916102 |
| 1FP5 | A | LYS | 499 | T | -2.540480  | 3.016390  | -7.328730  | -3.917099 |
| 1FP5 | A | GLY | 500 | T | -2.543552  | 2.988907  | -7.330710  | -3.920132 |
| 1FP5 | A | SER | 501 | T | -2.796684  | 2.278299  | -7.788036  | -4.008310 |
| 1FP5 | A | GLY | 502 | T | -3.158481  | 2.039513  | -7.891733  | -4.070807 |
| 1FP5 | A | PHE | 503 | C | -7.357619  | 7.243084  | -11.732207 | -4.788135 |
| 1FP5 | A | PHE | 504 | E | -9.303199  | 15.081539 | -14.289501 | -7.829398 |
| 1FP5 | A | VAL | 505 | E | -10.219892 | 15.523689 | -15.107457 | -8.018874 |
| 1FP5 | A | PHE | 506 | E | -12.873705 | 19.575965 | -15.103798 | -6.191673 |
| 1FP5 | A | SER | 507 | E | -12.859862 | 14.909008 | -15.649954 | -5.074688 |
| 1FP5 | A | ARG | 508 | E | -11.443708 | 13.364430 | -13.815969 | -4.796525 |
| 1FP5 | A | LEU | 509 | E | -11.367516 | 13.200366 | -14.043431 | -4.804328 |
| 1FP5 | A | GLU | 510 | E | -10.313903 | 9.649665  | -14.223294 | -4.635695 |
| 1FP5 | A | VAL | 511 | E | -9.724217  | 9.181963  | -14.018770 | -4.632851 |
| 1FP5 | A | THR | 512 | E | -9.719496  | 9.190932  | -14.042074 | -4.640036 |
| 1FP5 | A | ARG | 513 | C | -9.738139  | 9.014397  | -14.108699 | -4.646966 |
| 1FP5 | A | ALA | 514 | H | -9.742536  | 8.990218  | -14.099222 | -4.646017 |
| 1FP5 | A | GLU | 515 | H | -9.968576  | 9.014795  | -14.024640 | -4.666870 |
| 1FP5 | A | TRP | 516 | H | -11.760719 | 11.107795 | -16.610234 | -5.405598 |
| 1FP5 | A | GLU | 517 | H | -11.739146 | 10.270270 | -17.272275 | -5.601352 |
| 1FP5 | A | GLN | 518 | H | -12.218365 | 9.707263  | -18.380266 | -5.929776 |
| 1FP5 | A | LYS | 519 | H | -12.211644 | 9.979163  | -18.192164 | -5.884394 |
| 1FP5 | A | ASP | 520 | G | -12.122134 | 10.396145 | -17.893998 | -5.738035 |
| 1FP5 | A | GLU | 521 | G | -12.158417 | 10.268663 | -17.825250 | -5.705507 |
| 1FP5 | A | PHE | 522 | G | -13.049627 | 13.845796 | -16.312419 | -5.015393 |
| 1FP5 | A | ILE | 523 | E | -12.856001 | 13.653524 | -16.005993 | -4.786937 |
| 1FP5 | A | CYS | 524 | E | -12.911071 | 13.242323 | -16.140995 | -4.741503 |
| 1FP5 | A | ARG | 525 | E | -13.324430 | 13.614203 | -16.220329 | -4.605146 |
| 1FP5 | A | ALA | 526 | E | -11.277904 | 12.988454 | -13.217291 | -4.390315 |
| 1FP5 | A | VAL | 527 | E | -10.252501 | 13.021327 | -11.953803 | -4.277657 |
| 1FP5 | A | HIS | 528 | E | -9.260292  | 10.856990 | -11.620329 | -4.125578 |
| 1FP5 | A | GLU | 529 | T | -7.559758  | 6.644976  | -10.579854 | -3.529578 |
| 1FP5 | A | ALA | 530 | T | -6.272862  | 5.417679  | -8.931035  | -2.949447 |
| 1FP5 | A | ALA | 531 | T | -6.241470  | 5.415572  | -9.086865  | -2.987471 |
| 1FP5 | A | SER | 532 | T | -6.180726  | 5.414666  | -9.332416  | -3.078227 |
| 1FP5 | A | PRO | 533 | T | -6.179482  | 5.405746  | -9.344062  | -3.079395 |
| 1FP5 | A | SER | 534 | T | -6.236489  | 5.306467  | -9.225997  | -3.037654 |
| 1FP5 | A | GLN | 535 | T | -7.297896  | 5.539890  | -11.760524 | -3.851510 |
| 1FP5 | A | THR | 536 | T | -7.516071  | 5.600446  | -11.674422 | -3.924136 |
| 1FP5 | A | VAL | 537 | E | -9.141181  | 7.522726  | -12.681527 | -3.970319 |
| 1FP5 | A | GLN | 538 | E | -10.068735 | 10.808069 | -13.109310 | -4.516998 |
| 1FP5 | A | ARG | 539 | E | -8.167232  | 8.434353  | -9.771782  | -3.074355 |
| 1FP5 | A | ALA | 540 | E | -5.185615  | 6.449631  | -6.029729  | -2.409459 |
| 1FP5 | A | VAL | 541 | E | -5.185615  | 6.449631  | -6.029729  | -2.409459 |
| 1FP5 | A | SER | 542 | C | -5.185615  | 6.449631  | -6.029729  | -2.409459 |
| 1FP5 | A | VAL | 543 | C | -5.185615  | 6.449631  | -6.029729  | -2.409459 |
| 1FW1 | A | LYS | 5   | C | -6.706242  | 11.984151 | -6.521707  | -3.313724 |
| 1FW1 | A | PRO | 6   | C | -6.706242  | 11.984151 | -6.521707  | -3.313724 |
| 1FW1 | A | ILE | 7   | E | -6.706242  | 11.984151 | -6.521707  | -3.313724 |
| 1FW1 | A | LEU | 8   | E | -6.706242  | 11.984151 | -6.521707  | -3.313724 |
| 1FW1 | A | TYR | 9   | E | -10.534189 | 18.145865 | -9.950051  | -4.659682 |
| 1FW1 | A | SER | 10  | E | -13.446501 | 20.200910 | -14.150254 | -5.835069 |
| 1FW1 | A | TYR | 11  | T | -15.552825 | 17.169766 | -19.322604 | -6.035586 |
| 1FW1 | A | PHE | 12  | T | -14.727711 | 14.736652 | -19.380727 | -5.980992 |

|      |   |     |    |   |            |           |            |           |
|------|---|-----|----|---|------------|-----------|------------|-----------|
| 1FW1 | A | ARG | 13 | T | -13.959742 | 12.029405 | -19.973707 | -6.072926 |
| 1FW1 | A | SER | 14 | T | -13.809501 | 12.414518 | -19.856207 | -6.075842 |
| 1FW1 | A | SER | 15 | H | -13.812263 | 12.373669 | -19.881195 | -6.083750 |
| 1FW1 | A | CYS | 16 | H | -13.813157 | 12.387329 | -19.869855 | -6.081753 |
| 1FW1 | A | SER | 17 | H | -13.917287 | 12.079651 | -19.961521 | -6.103436 |
| 1FW1 | A | TRP | 18 | H | -14.584950 | 14.318307 | -19.470834 | -6.094756 |
| 1FW1 | A | ARG | 19 | H | -15.470729 | 16.875697 | -19.446617 | -5.954410 |
| 1FW1 | A | VAL | 20 | H | -12.877738 | 17.072205 | -13.460478 | -4.606891 |
| 1FW1 | A | ARG | 21 | H | -12.638637 | 16.763152 | -13.775011 | -4.607507 |
| 1FW1 | A | ILE | 22 | H | -10.566449 | 17.384234 | -9.143839  | -3.629675 |
| 1FW1 | A | ALA | 23 | H | -10.490670 | 17.397031 | -9.444237  | -3.734533 |
| 1FW1 | A | LEU | 24 | H | -9.565117  | 15.326923 | -10.527844 | -4.573157 |
| 1FW1 | A | ALA | 25 | H | -8.885520  | 14.125163 | -10.519211 | -4.657049 |
| 1FW1 | A | LEU | 26 | H | -7.570048  | 12.092162 | -9.903942  | -4.892069 |
| 1FW1 | A | LYS | 27 | H | -7.024944  | 12.794005 | -9.635767  | -5.281835 |
| 1FW1 | A | GLY | 28 | C | -6.118590  | 12.439314 | -8.328894  | -5.098854 |
| 1FW1 | A | ILE | 29 | C | -6.062750  | 12.761337 | -8.282946  | -5.109869 |
| 1FW1 | A | ASP | 30 | C | -6.015647  | 12.892384 | -8.270667  | -5.096150 |
| 1FW1 | A | TYR | 31 | C | -6.041286  | 13.014188 | -8.173247  | -5.097987 |
| 1FW1 | A | LYS | 32 | E | -6.047229  | 13.019642 | -7.980190  | -4.951175 |
| 1FW1 | A | THR | 33 | E | -6.746141  | 14.558840 | -8.030906  | -4.732516 |
| 1FW1 | A | VAL | 34 | E | -6.949670  | 13.971426 | -8.097985  | -4.536991 |
| 1FW1 | A | PRO | 35 | E | -7.247187  | 13.682844 | -7.992081  | -4.294634 |
| 1FW1 | A | ILE | 36 | C | -7.321529  | 13.296531 | -8.069181  | -4.243068 |
| 1FW1 | A | ASN | 37 | T | -6.308828  | 7.335830  | -9.954696  | -4.448245 |
| 1FW1 | A | LEU | 38 | T | -4.814630  | 6.180212  | -8.638770  | -4.329512 |
| 1FW1 | A | ILE | 39 | T | -2.810146  | 3.058364  | -7.681197  | -4.343565 |
| 1FW1 | A | LYS | 40 | T | -2.801879  | 3.069250  | -7.733051  | -4.354518 |
| 1FW1 | A | ASP | 41 | T | -2.801891  | 3.068991  | -7.733053  | -4.354527 |
| 1FW1 | A | GLY | 42 | T | -2.803488  | 3.057578  | -7.726753  | -4.354085 |
| 1FW1 | A | GLY | 43 | T | -2.822390  | 2.957933  | -7.696677  | -4.352829 |
| 1FW1 | A | GLN | 44 | G | -5.346793  | 3.794986  | -11.295912 | -5.059888 |
| 1FW1 | A | GLN | 45 | G | -9.313250  | 6.973189  | -15.889362 | -5.644541 |
| 1FW1 | A | PHE | 46 | G | -8.828431  | 11.014276 | -11.710158 | -4.672329 |
| 1FW1 | A | SER | 47 | C | -8.722454  | 10.685671 | -12.007222 | -4.644576 |
| 1FW1 | A | LYS | 48 | H | -7.965174  | 9.336715  | -11.641480 | -4.505836 |
| 1FW1 | A | ASP | 49 | H | -7.953709  | 9.395459  | -11.667365 | -4.513937 |
| 1FW1 | A | PHE | 50 | H | -7.964289  | 9.428781  | -11.593240 | -4.502520 |
| 1FW1 | A | GLN | 51 | H | -8.098962  | 8.919120  | -11.709974 | -4.474606 |
| 1FW1 | A | ALA | 52 | H | -8.058149  | 8.797159  | -11.849202 | -4.494363 |
| 1FW1 | A | LEU | 53 | H | -9.029895  | 9.211065  | -13.788517 | -4.889643 |
| 1FW1 | A | ASN | 54 | T | -8.967205  | 8.677625  | -14.285947 | -5.071028 |
| 1FW1 | A | PRO | 55 | T | -8.651874  | 9.152854  | -13.812145 | -5.102732 |
| 1FW1 | A | MET | 56 | T | -8.635939  | 9.328848  | -13.750315 | -5.114983 |
| 1FW1 | A | LYS | 57 | T | -8.858362  | 10.017192 | -13.779284 | -5.330700 |
| 1FW1 | A | GLN | 58 | C | -8.947802  | 9.837027  | -13.736336 | -5.285210 |
| 1FW1 | A | VAL | 59 | C | -9.060840  | 10.455726 | -13.156017 | -5.145881 |
| 1FW1 | A | PRO | 60 | C | -10.048201 | 13.827944 | -13.142262 | -5.183137 |
| 1FW1 | A | THR | 61 | E | -10.518714 | 17.069729 | -12.853466 | -5.471547 |
| 1FW1 | A | LEU | 62 | E | -8.742988  | 11.626518 | -11.701848 | -5.031948 |
| 1FW1 | A | LYS | 63 | E | -6.243606  | 7.955189  | -9.825819  | -4.668977 |
| 1FW1 | A | ILE | 64 | E | -3.421238  | 8.247525  | -5.878369  | -4.520653 |
| 1FW1 | A | ASP | 65 | T | -3.338206  | 8.114250  | -6.094911  | -4.495478 |
| 1FW1 | A | GLY | 66 | T | -3.322854  | 8.149295  | -6.134811  | -4.492567 |
| 1FW1 | A | ILE | 67 | E | -3.322845  | 8.149314  | -6.134815  | -4.492515 |
| 1FW1 | A | THR | 68 | E | -3.327092  | 8.150826  | -6.108226  | -4.491068 |
| 1FW1 | A | ILE | 69 | E | -4.438220  | 7.558343  | -7.521833  | -4.309443 |
| 1FW1 | A | HIS | 70 | E | -5.495546  | 9.438612  | -7.633968  | -4.351623 |
| 1FW1 | A | GLN | 71 | C | -8.491223  | 11.444014 | -11.454722 | -4.665628 |
| 1FW1 | A | SER | 72 | H | -9.163657  | 12.462704 | -12.387517 | -4.999540 |
| 1FW1 | A | LEU | 73 | H | -9.738254  | 12.588352 | -12.724510 | -4.691399 |
| 1FW1 | A | ALA | 74 | H | -9.754876  | 12.578695 | -12.663966 | -4.676943 |
| 1FW1 | A | ILE | 75 | H | -9.846381  | 12.935835 | -12.277828 | -4.608460 |
| 1FW1 | A | ILE | 76 | H | -10.468751 | 14.778657 | -11.631927 | -4.506787 |
| 1FW1 | A | GLU | 77 | H | -11.984584 | 14.974037 | -14.235897 | -4.911637 |
| 1FW1 | A | TYR | 78 | H | -12.026035 | 14.600860 | -15.271314 | -5.503698 |
| 1FW1 | A | LEU | 79 | H | -11.826833 | 13.854446 | -15.640810 | -5.544489 |
| 1FW1 | A | GLU | 80 | H | -10.739283 | 8.670023  | -16.116758 | -5.070027 |
| 1FW1 | A | GLU | 81 | H | -7.461643  | 6.893306  | -11.293470 | -4.192163 |
| 1FW1 | A | THR | 82 | H | -7.329713  | 6.854734  | -11.426959 | -4.119459 |
| 1FW1 | A | ARG | 83 | C | -7.328869  | 6.853019  | -11.433402 | -4.119126 |
| 1FW1 | A | PRO | 84 | T | -7.318476  | 6.898354  | -11.453399 | -4.116846 |
| 1FW1 | A | THR | 85 | T | -7.318886  | 6.909691  | -11.443230 | -4.115430 |
| 1FW1 | A | PRO | 86 | T | -8.223289  | 6.997362  | -12.052656 | -3.851789 |
| 1FW1 | A | ARG | 87 | T | -9.595609  | 9.770236  | -12.894889 | -4.077072 |
| 1FW1 | A | LEU | 88 | C | -9.592650  | 10.535265 | -12.648124 | -4.195341 |
| 1FW1 | A | LEU | 89 | C | -8.986572  | 11.596063 | -12.327827 | -5.178230 |
| 1FW1 | A | PRO | 90 | C | -6.562496  | 6.059829  | -10.727533 | -4.282552 |
| 1FW1 | A | GLN | 91 | C | -5.037610  | 4.272956  | -9.694844  | -4.157363 |
| 1FW1 | A | ASP | 92 | C | -5.036048  | 4.277064  | -9.703988  | -4.157322 |
| 1FW1 | A | PRO | 93 | H | -5.035574  | 4.277826  | -9.707455  | -4.157169 |

|      |   |     |     |   |            |           |            |           |
|------|---|-----|-----|---|------------|-----------|------------|-----------|
| 1FW1 | A | LYS | 94  | H | -5.036209  | 4.269844  | -9.705014  | -4.155999 |
| 1FW1 | A | LYS | 95  | H | -5.082313  | 4.132164  | -9.624125  | -4.146858 |
| 1FW1 | A | ARG | 96  | H | -8.370880  | 5.892826  | -13.426905 | -4.135197 |
| 1FW1 | A | ALA | 97  | H | -9.150399  | 6.054268  | -14.152890 | -4.121386 |
| 1FW1 | A | SER | 98  | H | -10.347740 | 8.261164  | -15.336061 | -4.678837 |
| 1FW1 | A | VAL | 99  | H | -11.706019 | 11.997868 | -16.320132 | -5.030025 |
| 1FW1 | A | ARG | 100 | H | -11.933485 | 11.952707 | -15.995383 | -4.719042 |
| 1FW1 | A | MET | 101 | H | -11.371607 | 12.773980 | -14.705463 | -4.720611 |
| 1FW1 | A | ILE | 102 | H | -11.163252 | 13.966883 | -13.722177 | -4.656957 |
| 1FW1 | A | SER | 103 | H | -11.087055 | 13.752836 | -13.823052 | -4.641137 |
| 1FW1 | A | ASP | 104 | H | -9.357675  | 11.644421 | -11.711566 | -4.375499 |
| 1FW1 | A | LEU | 105 | H | -7.846087  | 11.152800 | -9.930362  | -4.336278 |
| 1FW1 | A | ILE | 106 | H | -7.013037  | 11.170077 | -9.042067  | -4.288831 |
| 1FW1 | A | ALA | 107 | H | -6.997640  | 11.133567 | -9.150610  | -4.313625 |
| 1FW1 | A | GLY | 108 | H | -6.992454  | 11.114503 | -9.196376  | -4.321094 |
| 1FW1 | A | GLY | 109 | H | -7.001664  | 11.105625 | -9.164793  | -4.321506 |
| 1FW1 | A | ILE | 110 | H | -7.150180  | 11.103983 | -8.989449  | -4.318215 |
| 1FW1 | A | GLN | 111 | G | -8.949354  | 9.660728  | -13.611763 | -5.202167 |
| 1FW1 | A | PRO | 112 | G | -9.666910  | 9.279885  | -14.421825 | -5.102898 |
| 1FW1 | A | LEU | 113 | G | -10.651838 | 10.391689 | -14.497755 | -4.860294 |
| 1FW1 | A | GLN | 114 | G | -12.969604 | 10.400517 | -19.108457 | -5.606008 |
| 1FW1 | A | ASN | 115 | C | -11.066828 | 11.143478 | -14.556032 | -4.729401 |
| 1FW1 | A | LEU | 116 | H | -10.832412 | 11.702971 | -15.275669 | -5.293760 |
| 1FW1 | A | SER | 117 | H | -10.513006 | 11.172504 | -15.211547 | -5.111156 |
| 1FW1 | A | VAL | 118 | H | -9.767085  | 11.723976 | -13.450455 | -4.807779 |
| 1FW1 | A | LEU | 119 | H | -8.708646  | 10.783981 | -12.177828 | -4.766313 |
| 1FW1 | A | LYS | 120 | H | -6.295597  | 6.751732  | -10.326940 | -4.512030 |
| 1FW1 | A | GLN | 121 | H | -3.722756  | 4.960155  | -7.412124  | -4.103033 |
| 1FW1 | A | VAL | 122 | H | -3.342171  | 5.212215  | -7.362509  | -4.151527 |
| 1FW1 | A | GLY | 123 | C | -3.316910  | 5.208015  | -7.473023  | -4.174939 |
| 1FW1 | A | GLU | 124 | H | -3.315107  | 5.216503  | -7.481837  | -4.176408 |
| 1FW1 | A | GLU | 125 | H | -3.318801  | 5.207558  | -7.464368  | -4.174195 |
| 1FW1 | A | MET | 126 | H | -3.730600  | 5.459767  | -7.528078  | -4.235613 |
| 1FW1 | A | GLN | 127 | H | -5.156352  | 5.303872  | -10.001053 | -4.680133 |
| 1FW1 | A | LEU | 128 | H | -6.687468  | 8.083204  | -10.512659 | -4.642737 |
| 1FW1 | A | THR | 129 | H | -8.198341  | 8.591595  | -12.259866 | -4.778966 |
| 1FW1 | A | TRP | 130 | H | -10.356670 | 12.620390 | -17.392107 | -7.508719 |
| 1FW1 | A | ALA | 131 | H | -10.768358 | 13.146975 | -16.712020 | -6.837293 |
| 1FW1 | A | GLN | 132 | H | -11.144229 | 11.517744 | -15.660427 | -4.877355 |
| 1FW1 | A | ASN | 133 | H | -9.501771  | 9.676260  | -12.661870 | -4.221188 |
| 1FW1 | A | ALA | 134 | H | -8.754441  | 9.796882  | -11.878688 | -4.152143 |
| 1FW1 | A | ILE | 135 | H | -8.638823  | 10.501925 | -11.713590 | -4.225821 |
| 1FW1 | A | THR | 136 | H | -8.540362  | 10.503104 | -11.906660 | -4.322112 |
| 1FW1 | A | CYS | 137 | H | -8.397103  | 10.414969 | -12.045769 | -4.401623 |
| 1FW1 | A | GLY | 138 | H | -8.482793  | 10.623181 | -11.972967 | -4.445929 |
| 1FW1 | A | PHE | 139 | H | -8.842344  | 11.272298 | -12.292804 | -4.710795 |
| 1FW1 | A | ASN | 140 | H | -8.995268  | 10.419512 | -12.813894 | -4.762660 |
| 1FW1 | A | ALA | 141 | H | -9.206735  | 10.452598 | -12.760875 | -4.715399 |
| 1FW1 | A | LEU | 142 | H | -10.278104 | 12.701918 | -13.722858 | -4.859777 |
| 1FW1 | A | GLU | 143 | H | -10.482654 | 11.636637 | -14.386974 | -4.836171 |
| 1FW1 | A | GLN | 144 | H | -9.869054  | 10.146971 | -13.934013 | -4.524871 |
| 1FW1 | A | ILE | 145 | H | -9.353578  | 10.442759 | -12.987967 | -4.519653 |
| 1FW1 | A | LEU | 146 | H | -8.840700  | 9.823281  | -12.604345 | -4.471022 |
| 1FW1 | A | GLN | 147 | H | -7.775029  | 6.378931  | -12.776880 | -4.483512 |
| 1FW1 | A | SER | 148 | H | -6.692597  | 6.794343  | -10.705265 | -4.158008 |
| 1FW1 | A | THR | 149 | H | -6.688258  | 6.842737  | -10.708802 | -4.164971 |
| 1FW1 | A | ALA | 150 | B | -6.689772  | 6.838631  | -10.704519 | -4.165361 |
| 1FW1 | A | GLY | 151 | T | -6.698586  | 6.804123  | -10.679911 | -4.161817 |
| 1FW1 | A | ILE | 152 | T | -6.782839  | 7.000776  | -10.350714 | -4.113332 |
| 1FW1 | A | TYR | 153 | T | -8.971150  | 12.499400 | -12.231017 | -4.893359 |
| 1FW1 | A | CYS | 154 | T | -8.623541  | 9.598696  | -13.328172 | -5.124199 |
| 1FW1 | A | VAL | 155 | T | -7.649868  | 9.985086  | -11.001051 | -4.716577 |
| 1FW1 | A | GLY | 156 | B | -7.535843  | 9.742766  | -11.289148 | -4.754572 |
| 1FW1 | A | ASP | 157 | C | -7.541207  | 9.706359  | -11.292366 | -4.757350 |
| 1FW1 | A | GLU | 158 | C | -7.545288  | 9.681831  | -11.281989 | -4.754844 |
| 1FW1 | A | VAL | 159 | C | -7.617318  | 9.864213  | -10.976207 | -4.695232 |
| 1FW1 | A | THR | 160 | C | -8.527841  | 8.920037  | -12.703196 | -4.951409 |
| 1FW1 | A | MET | 161 | H | -10.478136 | 13.375353 | -14.065880 | -5.406068 |
| 1FW1 | A | ALA | 162 | H | -11.119315 | 14.277687 | -14.367003 | -5.228986 |
| 1FW1 | A | ASP | 163 | H | -11.240248 | 14.663077 | -14.200259 | -5.178626 |
| 1FW1 | A | LEU | 164 | H | -11.213829 | 15.993790 | -12.728972 | -4.623808 |
| 1FW1 | A | CYS | 165 | H | -11.266412 | 16.045398 | -12.580219 | -4.544759 |
| 1FW1 | A | LEU | 166 | H | -11.223956 | 16.166832 | -12.495756 | -4.505983 |
| 1FW1 | A | VAL | 167 | H | -11.079166 | 15.731495 | -12.617261 | -4.460533 |
| 1FW1 | A | PRO | 168 | H | -11.123058 | 15.678481 | -12.609159 | -4.453070 |
| 1FW1 | A | GLN | 169 | H | -11.595723 | 14.617023 | -13.931480 | -4.601803 |
| 1FW1 | A | VAL | 170 | H | -10.959960 | 11.785733 | -14.370920 | -4.568962 |
| 1FW1 | A | ALA | 171 | H | -10.991569 | 11.401089 | -14.531942 | -4.579033 |
| 1FW1 | A | ASN | 172 | H | -11.134627 | 10.636492 | -14.854624 | -4.633826 |
| 1FW1 | A | ALA | 173 | H | -11.104402 | 10.654891 | -14.894491 | -4.626900 |
| 1FW1 | A | GLU | 174 | H | -11.032591 | 10.920640 | -14.923227 | -4.664808 |

|      |   |     |     |   |            |           |            |           |
|------|---|-----|-----|---|------------|-----------|------------|-----------|
| 1FW1 | A | ARG | 175 | H | -11.761030 | 12.110378 | -16.058081 | -4.962972 |
| 1FW1 | A | PHE | 176 | H | -10.087258 | 14.637063 | -11.357735 | -4.634423 |
| 1FW1 | A | LYS | 177 | C | -6.171752  | 9.057914  | -8.121022  | -3.917023 |
| 1FW1 | A | VAL | 178 | C | -5.346201  | 9.367624  | -7.112584  | -3.753325 |
| 1FW1 | A | ASP | 179 | C | -5.338074  | 9.396799  | -7.148053  | -3.762159 |
| 1FW1 | A | LEU | 180 | T | -5.337415  | 9.399808  | -7.152545  | -3.762839 |
| 1FW1 | A | THR | 181 | T | -5.337014  | 9.399395  | -7.156441  | -3.763386 |
| 1FW1 | A | PRO | 182 | T | -5.502797  | 9.511933  | -6.846357  | -3.713932 |
| 1FW1 | A | TYR | 183 | T | -7.795592  | 11.509096 | -9.999972  | -4.412224 |
| 1FW1 | A | PRO | 184 | H | -8.899018  | 11.460298 | -11.938393 | -4.499170 |
| 1FW1 | A | THR | 185 | H | -9.243016  | 11.008182 | -12.570577 | -4.608203 |
| 1FW1 | A | ILE | 186 | H | -9.997392  | 11.892638 | -13.206811 | -4.672995 |
| 1FW1 | A | SER | 187 | H | -10.071557 | 11.389137 | -13.403118 | -4.671208 |
| 1FW1 | A | SER | 188 | H | -10.067579 | 11.325037 | -13.440229 | -4.664573 |
| 1FW1 | A | ILE | 189 | H | -11.073256 | 12.816532 | -14.434087 | -4.776941 |
| 1FW1 | A | ASN | 190 | H | -11.407601 | 11.524631 | -15.724667 | -4.747065 |
| 1FW1 | A | LYS | 191 | H | -9.970560  | 10.166401 | -13.039535 | -4.161012 |
| 1FW1 | A | ARG | 192 | H | -9.906314  | 10.383919 | -12.967471 | -4.128548 |
| 1FW1 | A | LEU | 193 | H | -9.393677  | 10.025139 | -12.594943 | -4.028007 |
| 1FW1 | A | LEU | 194 | H | -8.627799  | 8.457113  | -12.213520 | -3.867415 |
| 1FW1 | A | VAL | 195 | H | -8.573290  | 8.755218  | -12.153075 | -3.874085 |
| 1FW1 | A | LEU | 196 | C | -8.626086  | 8.638830  | -12.096548 | -3.853014 |
| 1FW1 | A | GLU | 197 | G | -8.633679  | 8.600729  | -12.086699 | -3.852096 |
| 1FW1 | A | ALA | 198 | G | -8.738500  | 8.374872  | -12.033017 | -3.831014 |
| 1FW1 | A | PHE | 199 | G | -9.972562  | 11.919556 | -11.757915 | -3.995369 |
| 1FW1 | A | GLN | 200 | T | -11.815142 | 13.010035 | -15.129824 | -4.757215 |
| 1FW1 | A | VAL | 201 | T | -8.784387  | 9.549742  | -11.786483 | -4.337661 |
| 1FW1 | A | SER | 202 | T | -8.632214  | 9.656425  | -11.970660 | -4.370979 |
| 1FW1 | A | HIS | 203 | T | -8.480877  | 10.265146 | -12.301749 | -4.709072 |
| 1FW1 | A | PRO | 204 | T | -8.342901  | 10.866977 | -12.689016 | -5.149123 |
| 1FW1 | A | CYS | 205 | T | -7.678932  | 11.113375 | -13.016417 | -6.395638 |
| 1FW1 | A | ARG | 206 | T | -7.638154  | 11.303196 | -13.245927 | -6.668845 |
| 1FW1 | A | GLN | 207 | T | -5.931254  | 9.041938  | -10.005472 | -5.463065 |
| 1FW1 | A | PRO | 208 | T | -3.424714  | 6.791206  | -5.647008  | -3.768733 |
| 1FW1 | A | ASP | 209 | T | -2.843482  | 5.838473  | -5.424281  | -3.382026 |
| 1FW1 | A | THR | 210 | T | -2.843482  | 5.838473  | -5.424281  | -3.382026 |
| 1FW1 | A | PRO | 211 | C | -2.843482  | 5.838473  | -5.424281  | -3.382026 |
| 1FW1 | A | THR | 212 | C | -2.843482  | 5.838473  | -5.424281  | -3.382026 |
| 1G1T | A | TRP | 1   | C | -14.433225 | 16.310522 | -17.155768 | -5.213913 |
| 1G1T | A | SER | 2   | E | -14.433225 | 16.310522 | -17.155768 | -5.213913 |
| 1G1T | A | TYR | 3   | E | -14.433225 | 16.310522 | -17.155768 | -5.213913 |
| 1G1T | A | ASN | 4   | E | -14.433225 | 16.310522 | -17.155768 | -5.213913 |
| 1G1T | A | THR | 5   | E | -4.310727  | 9.093548  | -6.690063  | -4.614535 |
| 1G1T | A | SER | 6   | E | -4.286738  | 9.072572  | -6.807695  | -4.622185 |
| 1G1T | A | THR | 7   | E | -4.254257  | 9.087100  | -6.930508  | -4.637618 |
| 1G1T | A | GLU | 8   | E | -4.254256  | 9.087108  | -6.930522  | -4.637620 |
| 1G1T | A | ALA | 9   | E | -4.254255  | 9.087112  | -6.930529  | -4.637621 |
| 1G1T | A | MET | 10  | E | -5.675772  | 9.010208  | -9.325940  | -4.862104 |
| 1G1T | A | THR | 11  | C | -5.991519  | 9.332546  | -9.101520  | -4.904995 |
| 1G1T | A | TYR | 12  | H | -10.924983 | 12.394591 | -15.544830 | -5.630446 |
| 1G1T | A | ASP | 13  | H | -9.644812  | 7.113805  | -15.113963 | -4.773141 |
| 1G1T | A | GLU | 14  | H | -9.647427  | 7.073054  | -15.112652 | -4.765892 |
| 1G1T | A | ALA | 15  | H | -9.649746  | 7.049500  | -15.103580 | -4.758844 |
| 1G1T | A | SER | 16  | H | -9.699863  | 6.616153  | -15.102078 | -4.690788 |
| 1G1T | A | ALA | 17  | H | -9.702889  | 6.583173  | -15.098946 | -4.687499 |
| 1G1T | A | TYR | 18  | H | -11.995131 | 9.892065  | -18.244252 | -5.500416 |
| 1G1T | A | CYS | 19  | H | -11.227482 | 9.924425  | -17.019982 | -5.598322 |
| 1G1T | A | GLN | 20  | H | -10.057790 | 10.763397 | -14.690741 | -5.473659 |
| 1G1T | A | GLN | 21  | H | -10.023118 | 10.887071 | -14.725067 | -5.475911 |
| 1G1T | A | ARG | 22  | H | -10.022744 | 10.931217 | -14.703810 | -5.476135 |
| 1G1T | A | TYR | 23  | C | -10.026894 | 11.062701 | -14.617367 | -5.472792 |
| 1G1T | A | THR | 24  | C | -9.903469  | 12.643326 | -13.447201 | -5.218474 |
| 1G1T | A | HIS | 25  | E | -10.207896 | 17.027369 | -10.854427 | -4.583010 |
| 1G1T | A | LEU | 26  | E | -10.195283 | 17.328723 | -10.611805 | -4.513244 |
| 1G1T | A | VAL | 27  | C | -10.150917 | 17.147607 | -10.829766 | -4.558758 |
| 1G1T | A | ALA | 28  | C | -10.159581 | 17.119150 | -10.803760 | -4.549029 |
| 1G1T | A | ILE | 29  | C | -10.444488 | 17.106605 | -11.120521 | -4.601417 |
| 1G1T | A | GLN | 30  | C | -11.072896 | 14.950205 | -13.784858 | -5.071091 |
| 1G1T | A | ASN | 31  | C | -11.263162 | 12.714594 | -15.755016 | -5.483824 |
| 1G1T | A | LYS | 32  | H | -11.248632 | 9.738813  | -17.467299 | -5.618036 |
| 1G1T | A | GLU | 33  | H | -11.213122 | 9.965757  | -17.401873 | -5.625822 |
| 1G1T | A | GLU | 34  | H | -11.330254 | 10.003326 | -17.309754 | -5.578015 |
| 1G1T | A | ILE | 35  | H | -11.285971 | 10.688875 | -16.912230 | -5.523267 |
| 1G1T | A | GLU | 36  | H | -11.308707 | 11.470475 | -16.343434 | -5.387051 |
| 1G1T | A | TYR | 37  | H | -11.421478 | 13.672254 | -14.877448 | -4.966176 |
| 1G1T | A | LEU | 38  | H | -10.562257 | 12.899374 | -13.201361 | -4.535957 |
| 1G1T | A | ASN | 39  | H | -9.514121  | 8.970387  | -13.302564 | -4.154588 |
| 1G1T | A | SER | 40  | H | -8.868242  | 10.246174 | -11.854311 | -4.051214 |
| 1G1T | A | ILE | 41  | H | -8.738204  | 10.786825 | -11.728227 | -4.114716 |
| 1G1T | A | LEU | 42  | C | -8.574970  | 10.906192 | -11.738078 | -4.182985 |
| 1G1T | A | SER | 43  | C | -7.977339  | 9.547590  | -11.501558 | -4.209905 |

|      |   |     |     |   |            |           |            |           |
|------|---|-----|-----|---|------------|-----------|------------|-----------|
| 1G1T | A | TYR | 44  | C | -7.985010  | 9.798433  | -11.423247 | -4.257704 |
| 1G1T | A | SER | 45  | T | -8.081028  | 9.605203  | -11.476190 | -4.303120 |
| 1G1T | A | PRO | 46  | T | -8.121383  | 9.366023  | -11.491144 | -4.297557 |
| 1G1T | A | SER | 47  | T | -8.193027  | 9.116454  | -11.449600 | -4.284079 |
| 1G1T | A | TYR | 48  | T | -9.758223  | 12.866504 | -12.248835 | -5.004924 |
| 1G1T | A | TYR | 49  | E | -12.571524 | 18.461217 | -13.854147 | -5.335138 |
| 1G1T | A | TRP | 50  | E | -13.048601 | 22.073453 | -12.331760 | -5.214290 |
| 1G1T | A | ILE | 51  | E | -12.742674 | 19.959965 | -13.505481 | -5.323289 |
| 1G1T | A | GLY | 52  | T | -12.296579 | 16.094179 | -15.132505 | -5.325256 |
| 1G1T | A | ILE | 53  | E | -11.446632 | 12.926297 | -15.227486 | -5.178963 |
| 1G1T | A | ARG | 54  | E | -9.886005  | 8.002299  | -15.638910 | -5.362361 |
| 1G1T | A | LYS | 55  | E | -4.553205  | 5.374696  | -8.897845  | -4.564003 |
| 1G1T | A | VAL | 56  | E | -4.263478  | 7.231869  | -8.027562  | -4.541962 |
| 1G1T | A | ASN | 57  | T | -4.259979  | 7.258693  | -8.032603  | -4.541260 |
| 1G1T | A | ASN | 58  | T | -4.259980  | 7.258680  | -8.032577  | -4.541257 |
| 1G1T | A | VAL | 59  | E | -4.260022  | 7.258651  | -8.032042  | -4.541198 |
| 1G1T | A | TRP | 60  | E | -4.817839  | 10.195927 | -6.673271  | -4.501551 |
| 1G1T | A | VAL | 61  | E | -7.298682  | 11.801136 | -8.890917  | -4.418087 |
| 1G1T | A | TRP | 62  | E | -8.340459  | 13.097928 | -10.128779 | -4.782409 |
| 1G1T | A | VAL | 63  | T | -5.122890  | 8.101883  | -8.073260  | -4.455410 |
| 1G1T | A | GLY | 64  | T | -4.537864  | 7.174678  | -8.158068  | -4.345180 |
| 1G1T | A | THR | 65  | T | -4.503268  | 7.337150  | -8.153970  | -4.336134 |
| 1G1T | A | GLN | 66  | T | -4.500366  | 7.346374  | -8.164323  | -4.335179 |
| 1G1T | A | LYS | 67  | E | -4.499954  | 7.341106  | -8.168967  | -4.334799 |
| 1G1T | A | PRO | 68  | E | -4.740899  | 6.978265  | -8.265937  | -4.274228 |
| 1G1T | A | LEU | 69  | C | -6.009047  | 9.676134  | -8.759118  | -4.245531 |
| 1G1T | A | THR | 70  | T | -6.660809  | 8.594370  | -10.744350 | -4.460567 |
| 1G1T | A | GLU | 71  | T | -6.779120  | 8.445894  | -10.887732 | -4.545307 |
| 1G1T | A | GLU | 72  | T | -6.842234  | 8.413030  | -10.807558 | -4.554623 |
| 1G1T | A | ALA | 73  | T | -7.616551  | 8.014915  | -12.170311 | -4.745870 |
| 1G1T | A | LYS | 74  | T | -7.720459  | 7.861333  | -12.137822 | -4.780802 |
| 1G1T | A | ASN | 75  | C | -8.712231  | 11.503319 | -12.476944 | -5.243009 |
| 1G1T | A | TRP | 76  | B | -8.031859  | 11.898032 | -10.935141 | -4.984519 |
| 1G1T | A | ALA | 77  | T | -5.946617  | 7.656912  | -9.277740  | -4.313021 |
| 1G1T | A | PRO | 78  | T | -5.397573  | 6.498457  | -9.881053  | -4.512038 |
| 1G1T | A | GLY | 79  | T | -5.395653  | 6.499167  | -9.897032  | -4.515389 |
| 1G1T | A | GLU | 80  | T | -5.397169  | 6.485067  | -9.892342  | -4.513864 |
| 1G1T | A | PRO | 81  | T | -5.402387  | 6.436198  | -9.887039  | -4.510085 |
| 1G1T | A | ASN | 82  | T | -5.691591  | 5.741328  | -10.315582 | -4.648247 |
| 1G1T | A | ASN | 83  | C | -8.038263  | 4.750540  | -15.285257 | -5.199414 |
| 1G1T | A | ARG | 84  | C | -6.433840  | 4.515895  | -12.202571 | -4.771187 |
| 1G1T | A | GLN | 85  | T | -6.411632  | 4.554437  | -12.297270 | -4.794124 |
| 1G1T | A | LYS | 86  | T | -6.412099  | 4.554614  | -12.294295 | -4.794523 |
| 1G1T | A | ASP | 87  | T | -6.415745  | 4.561846  | -12.264878 | -4.791933 |
| 1G1T | A | GLU | 88  | T | -6.438967  | 4.589031  | -12.148250 | -4.782121 |
| 1G1T | A | ASP | 89  | C | -8.357993  | 5.589863  | -14.834917 | -5.403594 |
| 1G1T | A | CYS | 90  | E | -10.824226 | 7.151085  | -18.059518 | -5.977660 |
| 1G1T | A | VAL | 91  | E | -12.461866 | 13.910283 | -17.078764 | -5.630222 |
| 1G1T | A | GLU | 92  | E | -12.694952 | 15.995960 | -15.973202 | -5.457162 |
| 1G1T | A | ILE | 93  | E | -12.725174 | 16.341307 | -15.699145 | -5.415302 |
| 1G1T | A | TYR | 94  | E | -12.814714 | 17.966891 | -15.091227 | -5.490016 |
| 1G1T | A | ILE | 95  | T | -8.605892  | 10.721785 | -11.713097 | -4.880233 |
| 1G1T | A | LYS | 96  | T | -7.455984  | 8.462596  | -11.939031 | -5.043427 |
| 1G1T | A | ARG | 97  | T | -5.535898  | 7.275229  | -9.227602  | -4.510829 |
| 1G1T | A | GLU | 98  | T | -4.957299  | 6.523354  | -9.490125  | -4.658997 |
| 1G1T | A | LYS | 99  | T | -4.955411  | 6.526850  | -9.501896  | -4.660097 |
| 1G1T | A | ASP | 100 | T | -4.956651  | 6.518111  | -9.497304  | -4.659638 |
| 1G1T | A | VAL | 101 | T | -4.964172  | 6.498065  | -9.465571  | -4.654358 |
| 1G1T | A | GLY | 102 | T | -5.234349  | 6.076001  | -9.665286  | -4.749037 |
| 1G1T | A | MET | 103 | E | -8.358960  | 7.653757  | -13.191661 | -5.003833 |
| 1G1T | A | TRP | 104 | E | -11.414896 | 13.444893 | -14.400396 | -5.202873 |
| 1G1T | A | ASN | 105 | E | -13.597045 | 13.088033 | -18.195889 | -5.595707 |
| 1G1T | A | ASP | 106 | E | -13.688454 | 9.213388  | -20.852811 | -5.947468 |
| 1G1T | A | GLU | 107 | E | -11.122143 | 7.654987  | -17.484168 | -5.553608 |
| 1G1T | A | ARG | 108 | T | -9.581812  | 7.249762  | -15.573408 | -5.326334 |
| 1G1T | A | CYS | 109 | T | -9.482965  | 7.579027  | -15.740534 | -5.459858 |
| 1G1T | A | SER | 110 | T | -9.464325  | 7.720008  | -15.750924 | -5.474423 |
| 1G1T | A | LYS | 111 | T | -9.458193  | 7.782436  | -15.748909 | -5.476689 |
| 1G1T | A | LYS | 112 | C | -9.491221  | 7.838775  | -15.635569 | -5.471511 |
| 1G1T | A | LYS | 113 | E | -10.420782 | 10.305387 | -16.458740 | -6.094323 |
| 1G1T | A | LEU | 114 | E | -11.234803 | 13.039279 | -15.856947 | -5.790427 |
| 1G1T | A | ALA | 115 | E | -11.775473 | 14.534737 | -15.509191 | -5.542819 |
| 1G1T | A | LEU | 116 | E | -12.189687 | 15.764416 | -15.182428 | -5.338798 |
| 1G1T | A | CYS | 117 | E | -12.049127 | 13.708310 | -15.758975 | -5.167724 |
| 1G1T | A | TYR | 118 | E | -11.431670 | 13.001988 | -15.190026 | -5.214967 |
| 1G1T | A | THR | 119 | E | -8.325870  | 6.610911  | -13.426562 | -4.791233 |
| 1G1T | A | ALA | 120 | C | -5.927734  | 5.539763  | -10.707415 | -4.608449 |
| 1G1T | A | ALA | 121 | C | -4.733905  | 4.479301  | -9.586649  | -4.314546 |
| 1G1T | A | CYS | 122 | C | -4.342630  | 4.050551  | -9.800505  | -4.400606 |
| 1G1T | A | THR | 123 | T | -4.263824  | 4.043989  | -9.924893  | -4.416392 |
| 1G1T | A | ASN | 124 | T | -4.263889  | 4.042101  | -9.925722  | -4.416561 |



|      |   |     |     |   |            |           |            |           |
|------|---|-----|-----|---|------------|-----------|------------|-----------|
| 1G1T | A | THR | 125 | T | -4.299924  | 3.948786  | -9.880763  | -4.404601 |
| 1G1T | A | SER | 126 | T | -4.619486  | 3.684596  | -10.209723 | -4.499147 |
| 1G1T | A | CYS | 127 | G | -5.482815  | 4.037745  | -10.883378 | -4.541815 |
| 1G1T | A | SER | 128 | G | -7.301702  | 6.085879  | -13.923804 | -5.233099 |
| 1G1T | A | GLY | 129 | G | -6.792164  | 6.470005  | -12.946665 | -5.311042 |
| 1G1T | A | HIS | 130 | C | -6.756702  | 6.508985  | -12.941154 | -5.292222 |
| 1G1T | A | GLY | 131 | E | -6.736238  | 6.496425  | -13.010264 | -5.303331 |
| 1G1T | A | GLU | 132 | E | -6.820360  | 6.552560  | -12.873480 | -5.294404 |
| 1G1T | A | CYS | 133 | E | -6.940838  | 6.555501  | -12.797512 | -5.324223 |
| 1G1T | A | VAL | 134 | E | -7.965361  | 6.649136  | -14.298714 | -5.293249 |
| 1G1T | A | GLU | 135 | E | -8.440550  | 7.197097  | -15.120758 | -5.607275 |
| 1G1T | A | THR | 136 | E | -8.583047  | 10.315407 | -13.477013 | -5.372499 |
| 1G1T | A | ILE | 137 | T | -8.518338  | 10.561805 | -13.325546 | -5.359541 |
| 1G1T | A | ASN | 138 | T | -8.561629  | 10.602263 | -13.285524 | -5.367011 |
| 1G1T | A | ASN | 139 | E | -8.579025  | 10.530869 | -13.311024 | -5.367360 |
| 1G1T | A | TYR | 140 | E | -8.626061  | 10.575041 | -13.299397 | -5.363099 |
| 1G1T | A | THR | 141 | E | -8.405326  | 6.531855  | -14.647650 | -5.113994 |
| 1G1T | A | CYS | 142 | E | -6.791037  | 3.735204  | -12.905300 | -4.619779 |
| 1G1T | A | LYS | 143 | E | -5.137902  | 3.348965  | -10.593865 | -4.324433 |
| 1G1T | A | CYS | 144 | E | -5.075016  | 3.765725  | -10.572511 | -4.358981 |
| 1G1T | A | ASP | 145 | T | -5.071108  | 3.797041  | -10.579046 | -4.360128 |
| 1G1T | A | PRO | 146 | T | -5.070896  | 3.808021  | -10.573983 | -4.359690 |
| 1G1T | A | GLY | 147 | T | -5.102146  | 3.820871  | -10.454438 | -4.347194 |
| 1G1T | A | PHE | 148 | E | -6.376348  | 7.595488  | -10.544189 | -4.665917 |
| 1G1T | A | SER | 149 | E | -7.685191  | 8.030071  | -12.712396 | -4.785006 |
| 1G1T | A | GLY | 150 | T | -8.133502  | 7.379905  | -14.342502 | -5.259012 |
| 1G1T | A | LEU | 151 | T | -8.493155  | 5.962063  | -16.557932 | -5.929376 |
| 1G1T | A | LYS | 152 | T | -8.442788  | 6.076223  | -16.585949 | -6.029856 |
| 1G1T | A | CYS | 153 | T | -6.450825  | 6.122793  | -11.390590 | -4.794873 |
| 1G1T | A | GLU | 154 | C | -4.496528  | 5.247265  | -7.715005  | -3.556026 |
| 1G1T | A | GLN | 155 | E | -4.496528  | 5.247265  | -7.715005  | -3.556026 |
| 1G1T | A | ILE | 156 | E | -4.496528  | 5.247265  | -7.715005  | -3.556026 |
| 1G1T | A | VAL | 157 | C | -4.496528  | 5.247265  | -7.715005  | -3.556026 |
| 1G96 | A | VAL | 10  | C | -0.245025  | 1.142165  | -4.076298  | -3.306670 |
| 1G96 | A | GLY | 11  | C | -0.245025  | 1.142165  | -4.076298  | -3.306670 |
| 1G96 | A | GLY | 12  | C | -0.245025  | 1.142165  | -4.076298  | -3.306670 |
| 1G96 | A | PRO | 13  | C | -0.245025  | 1.142165  | -4.076298  | -3.306670 |
| 1G96 | A | MET | 14  | E | -1.630798  | 1.933859  | -5.565092  | -3.465621 |
| 1G96 | A | ASP | 15  | E | -2.402227  | 2.248347  | -6.072927  | -3.702350 |
| 1G96 | A | ALA | 16  | C | -3.896910  | 4.318426  | -7.858750  | -4.473335 |
| 1G96 | A | SER | 17  | T | -6.031296  | 5.370386  | -11.621292 | -5.152513 |
| 1G96 | A | VAL | 18  | T | -6.508387  | 5.768661  | -11.222334 | -4.138228 |
| 1G96 | A | GLU | 19  | T | -6.405327  | 5.732315  | -11.131015 | -4.147658 |
| 1G96 | A | GLU | 20  | T | -6.528815  | 5.520090  | -10.970715 | -4.040696 |
| 1G96 | A | GLU | 21  | H | -6.558277  | 5.487622  | -10.971742 | -4.057602 |
| 1G96 | A | GLY | 22  | H | -6.625828  | 5.459234  | -10.939543 | -4.096018 |
| 1G96 | A | VAL | 23  | H | -7.067189  | 6.245750  | -11.600991 | -4.586646 |
| 1G96 | A | ARG | 24  | H | -8.477749  | 6.433016  | -10.201240 | -2.305066 |
| 1G96 | A | ARG | 25  | H | -8.486219  | 6.434306  | -10.122999 | -2.268746 |
| 1G96 | A | ALA | 26  | H | -9.550827  | 7.099531  | -11.999206 | -2.481878 |
| 1G96 | A | LEU | 27  | H | -10.018163 | 7.764386  | -13.197525 | -2.911108 |
| 1G96 | A | ASP | 28  | H | -9.538907  | 6.263288  | -12.935960 | -2.875429 |
| 1G96 | A | PHE | 29  | H | -8.650223  | 6.031806  | -13.040262 | -3.832499 |
| 1G96 | A | ALA | 30  | H | -8.366100  | 6.730619  | -12.863817 | -4.016579 |
| 1G96 | A | VAL | 31  | H | -8.332429  | 6.868822  | -13.239473 | -4.308801 |
| 1G96 | A | GLY | 32  | H | -8.082275  | 6.688425  | -13.765917 | -4.755024 |
| 1G96 | A | GLU | 33  | H | -7.717383  | 6.748057  | -13.542697 | -4.968360 |
| 1G96 | A | TYR | 34  | H | -7.467618  | 7.046560  | -15.059572 | -6.414512 |
| 1G96 | A | ASN | 35  | H | -7.005589  | 5.239657  | -13.982313 | -5.403644 |
| 1G96 | A | LYS | 36  | H | -5.726451  | 3.043553  | -9.798242  | -3.303735 |
| 1G96 | A | ALA | 37  | H | -4.664812  | 2.853998  | -7.673996  | -2.770848 |
| 1G96 | A | SER | 38  | C | -4.124539  | 3.128020  | -7.075765  | -2.785759 |
| 1G96 | A | ASN | 39  | C | -2.720729  | 3.711597  | -6.818329  | -4.164254 |
| 1G96 | A | ASP | 40  | C | -2.716962  | 3.718919  | -6.829972  | -4.159930 |
| 1G96 | A | MET | 41  | C | -2.717978  | 3.740778  | -6.824729  | -4.167001 |
| 1G96 | A | TYR | 42  | C | -2.736767  | 3.772832  | -6.808958  | -4.214623 |
| 1G96 | A | HIS | 43  | C | -2.763404  | 3.823707  | -6.802237  | -4.268026 |
| 1G96 | A | SER | 44  | C | -4.297535  | 5.961095  | -7.657553  | -3.587971 |
| 1G96 | A | ARG | 45  | C | -3.673352  | 6.895771  | -4.523278  | -2.495379 |
| 1G96 | A | ALA | 46  | T | -2.941647  | 5.374881  | -3.516813  | -2.033547 |
| 1G96 | A | LEU | 47  | T | -2.368443  | 4.944898  | -2.879161  | -1.912721 |
| 1G96 | A | GLN | 48  | T | -2.347806  | 5.026945  | -2.885232  | -1.915164 |
| 1G96 | A | VAL | 49  | T | -2.346113  | 5.119970  | -2.846245  | -1.924083 |
| 1G96 | A | VAL | 50  | C | -2.391982  | 4.936552  | -2.825729  | -1.919884 |
| 1G96 | A | ARG | 51  | C | -2.593625  | 4.964158  | -2.677482  | -1.929001 |
| 1G96 | A | ALA | 52  | C | -3.922888  | 7.989479  | -4.864322  | -3.082683 |
| 1G96 | A | ARG | 53  | E | -4.429810  | 9.525347  | -6.679333  | -4.588464 |
| 1G96 | A | LYS | 54  | E | -4.270865  | 4.010931  | -9.767957  | -5.094402 |
| 1G96 | A | GLN | 55  | C | -2.160269  | 3.586039  | -4.950468  | -3.369759 |
| 1G96 | A | ILE | 56  | C | -2.084547  | 3.540681  | -4.886132  | -3.192983 |
| 1G96 | A | VAL | 57  | C | -2.083144  | 3.538606  | -4.879947  | -3.181643 |

|      |   |     |     |   |            |           |            |           |
|------|---|-----|-----|---|------------|-----------|------------|-----------|
| 1G96 | A | ALA | 58  | C | -2.082957  | 3.540375  | -4.879896  | -3.181256 |
| 1G96 | A | GLY | 59  | C | -2.097209  | 3.542937  | -4.762696  | -3.139310 |
| 1G96 | A | VAL | 60  | E | -3.348442  | 3.168873  | -4.262519  | -1.769873 |
| 1G96 | A | ASN | 61  | E | -5.298062  | 6.715201  | -6.567271  | -2.748635 |
| 1G96 | A | TYR | 62  | E | -6.202352  | 9.729771  | -7.622198  | -3.577029 |
| 1G96 | A | PHE | 63  | E | -6.490308  | 10.422623 | -8.420110  | -4.090184 |
| 1G96 | A | LEU | 64  | E | -7.057375  | 10.051454 | -8.513254  | -3.322326 |
| 1G96 | A | ASP | 65  | E | -6.495759  | 8.522943  | -8.321817  | -3.344498 |
| 1G96 | A | VAL | 66  | E | -6.535626  | 8.273094  | -8.338655  | -3.315678 |
| 1G96 | A | GLU | 67  | E | -6.554835  | 8.161378  | -8.380328  | -3.336765 |
| 1G96 | A | LEU | 68  | E | -6.659655  | 7.957988  | -8.533967  | -3.429093 |
| 1G96 | A | GLY | 69  | E | -6.690227  | 7.987229  | -8.720186  | -3.607786 |
| 1G96 | A | ARG | 70  | E | -8.111369  | 9.574508  | -15.834683 | -7.413182 |
| 1G96 | A | THR | 71  | B | -6.916201  | 6.783504  | -13.282198 | -5.955810 |
| 1G96 | A | THR | 72  | C | -4.591520  | 3.232865  | -8.820451  | -3.874314 |
| 1G96 | A | CYS | 73  | C | -3.916576  | 3.147086  | -8.913416  | -4.239601 |
| 1G96 | A | THR | 74  | T | -3.076300  | 3.196013  | -7.954367  | -4.137044 |
| 1G96 | A | LYS | 75  | T | -3.025095  | 3.183130  | -7.959464  | -4.072443 |
| 1G96 | A | THR | 76  | T | -3.024520  | 3.183308  | -7.961517  | -4.071603 |
| 1G96 | A | GLN | 77  | T | -3.054542  | 3.215356  | -7.983266  | -4.129761 |
| 1G96 | A | PRO | 78  | C | -2.927111  | 3.012939  | -7.511430  | -3.809954 |
| 1G96 | A | ASN | 79  | T | -3.231545  | 3.086993  | -8.285649  | -4.110502 |
| 1G96 | A | LEU | 80  | T | -3.298896  | 3.097363  | -8.357441  | -4.213891 |
| 1G96 | A | ASP | 81  | T | -3.297072  | 3.095951  | -8.356414  | -4.208046 |
| 1G96 | A | ASN | 82  | T | -3.316960  | 3.043021  | -8.239944  | -4.146077 |
| 1G96 | A | CYS | 83  | T | -3.888220  | 3.867073  | -10.428272 | -5.613045 |
| 1G96 | A | PRO | 84  | C | -5.690617  | 3.771503  | -10.898122 | -4.113990 |
| 1G96 | A | PHE | 85  | B | -6.169685  | 4.907422  | -10.005699 | -3.709906 |
| 1G96 | A | HIS | 86  | C | -5.408097  | 6.070735  | -7.308200  | -3.214842 |
| 1G96 | A | ASP | 87  | C | -4.193737  | 3.117639  | -6.578375  | -2.614424 |
| 1G96 | A | GLN | 88  | T | -4.125821  | 3.229957  | -6.646449  | -2.609952 |
| 1G96 | A | PRO | 89  | T | -4.117071  | 3.266658  | -6.693416  | -2.628111 |
| 1G96 | A | HIS | 90  | T | -4.118786  | 3.247914  | -6.687886  | -2.625027 |
| 1G96 | A | LEU | 91  | T | -4.186750  | 2.926605  | -6.630315  | -2.561667 |
| 1G96 | A | LYS | 92  | T | -5.358715  | 4.422217  | -7.573722  | -2.753514 |
| 1G96 | A | ARG | 93  | E | -6.560750  | 6.136928  | -9.959001  | -3.925295 |
| 1G96 | A | LYS | 94  | E | -9.193904  | 8.187379  | -12.180012 | -3.825487 |
| 1G96 | A | ALA | 95  | E | -10.896697 | 10.257315 | -14.206204 | -4.373501 |
| 1G96 | A | PHE | 96  | E | -12.244144 | 12.538393 | -16.092740 | -5.294049 |
| 1G96 | A | CYS | 97  | E | -13.407604 | 11.665540 | -16.478686 | -3.994482 |
| 1G96 | A | SER | 98  | E | -13.906659 | 12.232711 | -17.838236 | -4.567864 |
| 1G96 | A | PHE | 99  | E | -14.232236 | 13.644522 | -16.973156 | -4.310030 |
| 1G96 | A | GLN | 100 | E | -13.340045 | 19.229627 | -20.433959 | -9.974217 |
| 1G96 | A | ILE | 101 | E | -9.895878  | 15.311731 | -15.873375 | -8.882028 |
| 1G96 | A | TYR | 102 | E | -8.437238  | 13.554588 | -13.119602 | -7.439748 |
| 1G96 | A | ALA | 103 | E | -6.092421  | 11.567146 | -8.516813  | -5.655591 |
| 1G96 | A | VAL | 104 | E | -3.954476  | 5.923484  | -6.856433  | -3.951992 |
| 1G96 | A | PRO | 105 | G | -3.509790  | 5.291094  | -6.351383  | -3.488188 |
| 1G96 | A | TRP | 106 | G | -3.284193  | 5.317592  | -6.084099  | -3.368804 |
| 1G96 | A | GLN | 107 | G | -3.213277  | 5.375533  | -6.067579  | -3.342297 |
| 1G96 | A | GLY | 108 | C | -3.083423  | 5.704723  | -5.726313  | -3.256303 |
| 1G96 | A | THR | 109 | E | -3.221949  | 5.773439  | -5.468246  | -3.110107 |
| 1G96 | A | MET | 110 | E | -3.433007  | 6.333223  | -5.300756  | -3.133042 |
| 1G96 | A | THR | 111 | E | -3.734964  | 6.988771  | -5.199474  | -3.150685 |
| 1G96 | A | LEU | 112 | E | -3.915881  | 7.405396  | -4.970271  | -3.157631 |
| 1G96 | A | SER | 113 | E | -4.933342  | 8.603372  | -7.529351  | -4.053359 |
| 1G96 | A | LYS | 114 | E | -5.219655  | 7.553436  | -6.852546  | -3.244975 |
| 1G96 | A | SER | 115 | E | -6.007958  | 6.337662  | -8.232313  | -3.022383 |
| 1G96 | A | THR | 116 | E | -6.230259  | 5.463989  | -9.082662  | -3.079175 |
| 1G96 | A | CYS | 117 | E | -5.676760  | 4.555897  | -7.733539  | -2.492927 |
| 1G96 | A | GLN | 118 | E | -5.676760  | 4.555897  | -7.733539  | -2.492927 |
| 1G96 | A | ASP | 119 | E | -5.676760  | 4.555897  | -7.733539  | -2.492927 |
| 1G96 | A | ALA | 120 | C | -5.676760  | 4.555897  | -7.733539  | -2.492927 |
| 1GEN | A | LEU | 461 | C | 1.903951   | 0.075884  | -2.207330  | -3.177996 |
| 1GEN | A | GLY | 462 | C | 1.903951   | 0.075884  | -2.207330  | -3.177996 |
| 1GEN | A | PRO | 463 | C | 1.903951   | 0.075884  | -2.207330  | -3.177996 |
| 1GEN | A | VAL | 464 | C | 1.903951   | 0.075884  | -2.207330  | -3.177996 |
| 1GEN | A | THR | 465 | C | 0.454534   | 1.697981  | 0.025228   | -1.186298 |
| 1GEN | A | PRO | 466 | C | -1.764794  | 4.112224  | -1.236842  | -1.168387 |
| 1GEN | A | GLU | 467 | T | -3.404062  | 5.448197  | -4.156909  | -2.368029 |
| 1GEN | A | ILE | 468 | T | -4.707159  | 9.180080  | -4.874337  | -3.250759 |
| 1GEN | A | CYS | 469 | T | -6.620303  | 10.936051 | -9.840305  | -5.283313 |
| 1GEN | A | LYS | 470 | T | -6.762994  | 10.933471 | -10.128651 | -5.485241 |
| 1GEN | A | GLN | 471 | T | -7.393657  | 11.373748 | -11.539687 | -6.099127 |
| 1GEN | A | ASP | 472 | C | -8.083527  | 11.627028 | -12.705011 | -6.273656 |
| 1GEN | A | ILE | 473 | C | -8.367868  | 11.133795 | -12.418014 | -5.725882 |
| 1GEN | A | VAL | 474 | C | -8.746441  | 8.029390  | -11.988382 | -4.039248 |
| 1GEN | A | PHE | 475 | C | -10.277470 | 14.687189 | -11.819701 | -5.126541 |
| 1GEN | A | ASP | 476 | C | -11.820217 | 16.437736 | -11.866683 | -3.883908 |
| 1GEN | A | GLY | 477 | E | -12.303165 | 16.385727 | -12.372994 | -3.561568 |
| 1GEN | A | ILE | 478 | E | -12.449539 | 16.646693 | -12.741140 | -3.948943 |

|      |   |     |     |   |            |           |            |           |
|------|---|-----|-----|---|------------|-----------|------------|-----------|
| 1GEN | A | ALA | 479 | E | -12.408830 | 16.202987 | -12.855169 | -3.831385 |
| 1GEN | A | GLN | 480 | E | -11.787188 | 12.031782 | -15.047871 | -4.616530 |
| 1GEN | A | ILE | 481 | E | -9.955417  | 13.437333 | -12.107785 | -5.226748 |
| 1GEN | A | ARG | 482 | T | -9.961029  | 13.399285 | -12.113747 | -5.241157 |
| 1GEN | A | GLY | 483 | T | -9.960979  | 13.400045 | -12.113658 | -5.240991 |
| 1GEN | A | GLU | 484 | E | -9.961772  | 13.402979 | -12.111131 | -5.245206 |
| 1GEN | A | ILE | 485 | E | -9.981002  | 13.509937 | -11.980402 | -5.254597 |
| 1GEN | A | PHE | 486 | E | -13.818625 | 17.294883 | -14.533264 | -4.449591 |
| 1GEN | A | PHE | 487 | E | -14.983896 | 21.191797 | -12.971980 | -3.531396 |
| 1GEN | A | PHE | 488 | E | -14.960580 | 21.456348 | -13.429392 | -3.917060 |
| 1GEN | A | LYS | 489 | E | -13.719193 | 18.158557 | -10.891470 | -2.310421 |
| 1GEN | A | ASP | 490 | T | -13.710040 | 18.176773 | -10.884970 | -2.288434 |
| 1GEN | A | ARG | 491 | T | -13.713303 | 18.133430 | -10.862943 | -2.264262 |
| 1GEN | A | PHE | 492 | E | -13.724940 | 18.041098 | -10.792565 | -2.216320 |
| 1GEN | A | ILE | 493 | E | -13.775548 | 17.821131 | -10.613645 | -2.106219 |
| 1GEN | A | TRP | 494 | E | -15.278310 | 17.881334 | -13.713376 | -2.525630 |
| 1GEN | A | ARG | 495 | E | -12.534369 | 9.952865  | -15.600122 | -3.947548 |
| 1GEN | A | THR | 496 | E | -9.674182  | 9.255453  | -12.349581 | -4.087248 |
| 1GEN | A | VAL | 497 | T | -9.239864  | 9.082860  | -11.763133 | -3.455609 |
| 1GEN | A | THR | 498 | T | -9.075608  | 8.993706  | -11.202749 | -2.954000 |
| 1GEN | A | PRO | 499 | T | -9.065116  | 9.033552  | -11.171479 | -2.919543 |
| 1GEN | A | ARG | 500 | T | -8.972275  | 8.860029  | -11.452797 | -3.024949 |
| 1GEN | A | ASP | 501 | T | -7.189704  | 8.890459  | -10.383762 | -4.808810 |
| 1GEN | A | LYS | 502 | C | -6.865404  | 10.546004 | -9.272100  | -4.523527 |
| 1GEN | A | PRO | 503 | C | -6.848014  | 10.562602 | -9.212108  | -4.444621 |
| 1GEN | A | MET | 504 | E | -6.821059  | 10.548178 | -9.109533  | -4.309486 |
| 1GEN | A | GLY | 505 | E | -6.763664  | 10.656169 | -8.978693  | -4.189995 |
| 1GEN | A | PRO | 506 | E | -7.124247  | 12.256418 | -7.781262  | -3.570035 |
| 1GEN | A | LEU | 507 | E | -7.733736  | 11.433893 | -7.743861  | -2.514102 |
| 1GEN | A | LEU | 508 | E | -7.823503  | 11.579239 | -7.774707  | -2.634801 |
| 1GEN | A | VAL | 509 | G | -7.988784  | 12.009854 | -8.047681  | -3.031299 |
| 1GEN | A | ALA | 510 | G | -8.809758  | 13.360303 | -8.622499  | -3.029501 |
| 1GEN | A | THR | 511 | G | -9.172980  | 13.132477 | -8.460663  | -2.550065 |
| 1GEN | A | PHE | 512 | T | -10.067855 | 12.830099 | -8.820472  | -1.975336 |
| 1GEN | A | TRP | 513 | T | -10.762834 | 13.382330 | -11.420686 | -3.645069 |
| 1GEN | A | PRO | 514 | T | -10.252496 | 12.226190 | -9.822809  | -2.337766 |
| 1GEN | A | GLU | 515 | T | -10.389442 | 11.603308 | -9.946956  | -2.134883 |
| 1GEN | A | LEU | 516 | T | -9.777976  | 13.368280 | -10.543223 | -3.812156 |
| 1GEN | A | PRO | 517 | T | -9.772693  | 13.369646 | -10.574785 | -3.814684 |
| 1GEN | A | GLU | 518 | T | -9.774152  | 13.356480 | -10.580104 | -3.820256 |
| 1GEN | A | LYS | 519 | T | -9.955285  | 14.017516 | -11.270539 | -4.692146 |
| 1GEN | A | ILE | 520 | T | -10.019376 | 14.350937 | -10.975464 | -4.734482 |
| 1GEN | A | ASP | 521 | C | -12.501152 | 13.602001 | -14.080438 | -3.912912 |
| 1GEN | A | ALA | 522 | E | -13.683518 | 14.606007 | -13.830440 | -2.580860 |
| 1GEN | A | VAL | 523 | E | -13.853347 | 16.041962 | -13.319195 | -2.616050 |
| 1GEN | A | TYR | 524 | E | -13.834568 | 16.785613 | -13.356781 | -2.980497 |
| 1GEN | A | GLU | 525 | E | -11.070804 | 10.170826 | -14.583808 | -4.702530 |
| 1GEN | A | ALA | 526 | E | -9.035333  | 9.808031  | -13.084865 | -5.463013 |
| 1GEN | A | PRO | 527 | T | -9.028765  | 9.832484  | -13.108900 | -5.460572 |
| 1GEN | A | GLN | 528 | T | -9.028638  | 9.832444  | -13.109693 | -5.460176 |
| 1GEN | A | GLU | 529 | T | -9.028647  | 9.832040  | -13.109915 | -5.460260 |
| 1GEN | A | GLU | 530 | T | -9.047618  | 9.823299  | -13.061646 | -5.484398 |
| 1GEN | A | LYS | 531 | E | -11.667255 | 12.162024 | -15.251182 | -5.159775 |
| 1GEN | A | ALA | 532 | E | -13.451000 | 14.921593 | -14.778876 | -3.645018 |
| 1GEN | A | VAL | 533 | E | -13.501104 | 18.702957 | -12.079765 | -3.015906 |
| 1GEN | A | PHE | 534 | E | -13.444292 | 19.375049 | -11.377634 | -2.818107 |
| 1GEN | A | PHE | 535 | E | -10.879019 | 12.378050 | -12.622138 | -4.263821 |
| 1GEN | A | ALA | 536 | E | -10.627694 | 12.645817 | -13.146020 | -4.701602 |
| 1GEN | A | GLY | 537 | T | -10.628174 | 12.636294 | -13.149492 | -4.703321 |
| 1GEN | A | ASN | 538 | T | -10.629931 | 12.615720 | -13.160493 | -4.712281 |
| 1GEN | A | GLU | 539 | E | -10.631322 | 12.605309 | -13.164897 | -4.718579 |
| 1GEN | A | TYR | 540 | E | -11.254163 | 13.192688 | -14.135845 | -5.528258 |
| 1GEN | A | TRP | 541 | E | -15.096987 | 18.791020 | -16.350107 | -5.026693 |
| 1GEN | A | ILE | 542 | E | -14.873218 | 16.033164 | -16.640781 | -4.348977 |
| 1GEN | A | TYR | 543 | E | -13.108462 | 9.507880  | -14.027842 | -1.924721 |
| 1GEN | A | SER | 544 | E | -10.550365 | 7.878650  | -10.291593 | -1.134647 |
| 1GEN | A | ALA | 545 | T | -10.349106 | 7.958231  | -11.512593 | -1.918774 |
| 1GEN | A | SER | 546 | T | -9.509544  | 8.908894  | -12.503268 | -3.847107 |
| 1GEN | A | THR | 547 | E | -8.513992  | 9.196333  | -11.208707 | -3.778255 |
| 1GEN | A | LEU | 548 | E | -8.492986  | 9.300604  | -11.165415 | -3.739898 |
| 1GEN | A | GLU | 549 | T | -8.472292  | 9.453065  | -11.071298 | -3.713460 |
| 1GEN | A | ARG | 550 | T | -7.967704  | 9.735614  | -10.541696 | -3.882003 |
| 1GEN | A | GLY | 551 | T | -7.903719  | 10.149513 | -10.556989 | -4.063944 |
| 1GEN | A | TYR | 552 | T | -8.107005  | 10.513338 | -10.411681 | -4.187360 |
| 1GEN | A | PRO | 553 | T | -8.116410  | 10.488870 | -10.417944 | -4.209224 |
| 1GEN | A | LYS | 554 | E | -8.133192  | 10.473954 | -10.452974 | -4.264049 |
| 1GEN | A | PRO | 555 | E | -8.890670  | 12.329648 | -11.130208 | -4.839508 |
| 1GEN | A | LEU | 556 | G | -8.808089  | 13.623343 | -9.895726  | -4.519051 |
| 1GEN | A | THR | 557 | G | -8.677995  | 14.108590 | -9.679399  | -4.399281 |
| 1GEN | A | SER | 558 | G | -8.665521  | 14.130026 | -9.633281  | -4.346439 |
| 1GEN | A | LEU | 559 | G | -8.647440  | 14.156520 | -9.524722  | -4.252601 |

|      |   |     |     |   |            |           |            |           |
|------|---|-----|-----|---|------------|-----------|------------|-----------|
| 1GEN | A | GLY | 560 | C | -6.697223  | 7.811441  | -8.616573  | -3.413858 |
| 1GEN | A | LEU | 561 | C | -6.271844  | 9.122432  | -8.051393  | -3.656942 |
| 1GEN | A | PRO | 562 | T | -6.215574  | 9.059754  | -8.131676  | -3.595279 |
| 1GEN | A | PRO | 563 | T | -6.213925  | 9.052633  | -8.135941  | -3.588438 |
| 1GEN | A | ASP | 564 | T | -6.214359  | 9.049163  | -8.136716  | -3.590113 |
| 1GEN | A | VAL | 565 | T | -6.545216  | 10.142466 | -7.799436  | -3.746005 |
| 1GEN | A | GLN | 566 | C | -7.597989  | 8.647843  | -8.951750  | -2.946996 |
| 1GEN | A | ARG | 567 | C | -9.601257  | 7.667060  | -9.503374  | -1.240677 |
| 1GEN | A | VAL | 568 | C | -11.884172 | 10.765111 | -12.080086 | -1.747498 |
| 1GEN | A | ASP | 569 | C | -12.568733 | 11.976701 | -14.911132 | -3.473293 |
| 1GEN | A | ALA | 570 | E | -12.732348 | 12.693731 | -14.510094 | -3.459056 |
| 1GEN | A | ALA | 571 | E | -13.091583 | 14.720756 | -12.872285 | -2.802327 |
| 1GEN | A | PHE | 572 | E | -14.346082 | 17.207365 | -14.190293 | -3.356881 |
| 1GEN | A | ASN | 573 | E | -14.492786 | 16.648998 | -15.795246 | -4.263136 |
| 1GEN | A | TRP | 574 | E | -13.034010 | 11.251786 | -14.267143 | -2.932988 |
| 1GEN | A | SER | 575 | T | -10.666643 | 6.941832  | -16.294385 | -5.099429 |
| 1GEN | A | LYS | 576 | T | -10.187881 | 8.724090  | -16.021894 | -5.766125 |
| 1GEN | A | ASN | 577 | T | -10.187746 | 8.725598  | -16.022402 | -5.766115 |
| 1GEN | A | LYS | 578 | T | -10.187779 | 8.725634  | -16.022177 | -5.766221 |
| 1GEN | A | LYS | 579 | E | -10.192254 | 8.710267  | -16.036531 | -5.788674 |
| 1GEN | A | THR | 580 | E | -10.536649 | 10.169668 | -15.802118 | -6.300076 |
| 1GEN | A | TYR | 581 | E | -13.143448 | 20.066102 | -12.639935 | -5.023780 |
| 1GEN | A | ILE | 582 | E | -12.186071 | 17.963068 | -11.617163 | -4.049839 |
| 1GEN | A | PHE | 583 | E | -11.563707 | 15.688035 | -10.593851 | -2.909721 |
| 1GEN | A | ALA | 584 | E | -11.319389 | 14.956212 | -10.431105 | -2.581308 |
| 1GEN | A | GLY | 585 | T | -11.317408 | 14.952301 | -10.451746 | -2.589047 |
| 1GEN | A | ASP | 586 | T | -11.342222 | 14.727768 | -10.370691 | -2.483228 |
| 1GEN | A | LYS | 587 | E | -11.470539 | 14.075029 | -10.114909 | -2.158499 |
| 1GEN | A | PHE | 588 | E | -11.951471 | 13.585406 | -10.200966 | -1.985198 |
| 1GEN | A | TRP | 589 | E | -14.339013 | 16.979295 | -15.072391 | -4.592030 |
| 1GEN | A | ARG | 590 | E | -16.761523 | 19.910197 | -18.535576 | -5.862511 |
| 1GEN | A | TYR | 591 | E | -13.956503 | 13.124462 | -19.200656 | -6.724682 |
| 1GEN | A | ASN | 592 | E | -11.892625 | 9.645571  | -17.041236 | -5.346464 |
| 1GEN | A | GLU | 593 | T | -11.752062 | 9.120152  | -16.819121 | -4.864866 |
| 1GEN | A | VAL | 594 | T | -10.855911 | 8.005262  | -13.442066 | -2.907368 |
| 1GEN | A | LYS | 595 | T | -10.827502 | 8.017402  | -13.654831 | -3.006749 |
| 1GEN | A | LYS | 596 | T | -10.786245 | 7.997038  | -13.962837 | -3.174134 |
| 1GEN | A | LYS | 597 | E | -10.579026 | 8.116206  | -14.226491 | -3.497215 |
| 1GEN | A | MET | 598 | E | -10.380519 | 8.981031  | -13.376087 | -3.276113 |
| 1GEN | A | ASP | 599 | T | -9.383061  | 9.560961  | -9.391836  | -2.019320 |
| 1GEN | A | PRO | 600 | T | -7.726025  | 9.356707  | -9.496251  | -3.659353 |
| 1GEN | A | GLY | 601 | T | -7.653236  | 9.798764  | -9.603377  | -3.812138 |
| 1GEN | A | PHE | 602 | T | -7.654900  | 9.802543  | -9.586802  | -3.810035 |
| 1GEN | A | PRO | 603 | C | -7.656606  | 9.799791  | -9.581015  | -3.812871 |
| 1GEN | A | LYS | 604 | E | -7.682440  | 9.810677  | -9.622668  | -3.900897 |
| 1GEN | A | LEU | 605 | E | -7.274292  | 7.877672  | -8.879072  | -3.027433 |
| 1GEN | A | ILE | 606 | G | -7.231977  | 8.386839  | -8.729893  | -3.080797 |
| 1GEN | A | ALA | 607 | G | -7.224058  | 8.431325  | -8.713964  | -3.058758 |
| 1GEN | A | ASP | 608 | G | -7.216516  | 8.480750  | -8.703016  | -3.042319 |
| 1GEN | A | ALA | 609 | C | -7.210099  | 8.567994  | -8.657316  | -3.022575 |
| 1GEN | A | TRP | 610 | T | -8.177046  | 14.239274 | -8.009413  | -3.601902 |
| 1GEN | A | ASN | 611 | T | -7.700081  | 12.632028 | -8.440246  | -4.038635 |
| 1GEN | A | ALA | 612 | T | -7.689968  | 12.701561 | -8.513079  | -4.090920 |
| 1GEN | A | ILE | 613 | T | -7.706045  | 12.716793 | -8.532014  | -4.155541 |
| 1GEN | A | PRO | 614 | T | -7.724244  | 12.636124 | -8.629131  | -4.247148 |
| 1GEN | A | ASP | 615 | T | -7.776407  | 12.401562 | -8.703899  | -4.322893 |
| 1GEN | A | ASN | 616 | T | -9.470536  | 13.661765 | -9.546749  | -3.498730 |
| 1GEN | A | LEU | 617 | T | -11.058137 | 14.741223 | -10.884854 | -3.238577 |
| 1GEN | A | ASP | 618 | C | -11.422117 | 13.960874 | -12.760139 | -4.263886 |
| 1GEN | A | ALA | 619 | E | -11.446106 | 14.030078 | -12.765375 | -4.335244 |
| 1GEN | A | VAL | 620 | E | -11.495804 | 14.266674 | -12.555313 | -4.356646 |
| 1GEN | A | VAL | 621 | E | -10.534359 | 10.027346 | -14.716631 | -5.370717 |
| 1GEN | A | ASP | 622 | E | -9.783086  | 9.070217  | -14.362660 | -4.932912 |
| 1GEN | A | LEU | 623 | T | -7.748443  | 5.563558  | -10.194085 | -2.739654 |
| 1GEN | A | GLN | 624 | T | -7.648469  | 5.302371  | -10.450982 | -2.715356 |
| 1GEN | A | GLY | 625 | T | -7.323193  | 4.709755  | -11.837875 | -3.575603 |
| 1GEN | A | GLY | 626 | T | -7.325345  | 4.691395  | -11.828515 | -3.569425 |
| 1GEN | A | GLY | 627 | C | -7.332111  | 4.645333  | -11.801009 | -3.555746 |
| 1GEN | A | HIS | 628 | E | -7.718734  | 3.907706  | -13.407874 | -4.374169 |
| 1GEN | A | SER | 629 | E | -7.832608  | 3.912830  | -13.738344 | -4.753761 |
| 1GEN | A | TYR | 630 | E | -11.575894 | 11.084576 | -16.254083 | -5.988503 |
| 1GEN | A | PHE | 631 | E | -12.456009 | 18.075020 | -12.960581 | -5.400551 |
| 1GEN | A | PHE | 632 | E | -12.060911 | 17.535799 | -12.749986 | -4.874552 |
| 1GEN | A | LYS | 633 | E | -12.034334 | 17.411137 | -12.768127 | -4.780991 |
| 1GEN | A | GLY | 634 | T | -12.030909 | 17.397732 | -12.771271 | -4.764658 |
| 1GEN | A | ALA | 635 | T | -12.030271 | 17.390979 | -12.77065  | -4.763530 |
| 1GEN | A | TYR | 636 | E | -12.423512 | 16.760816 | -12.618650 | -4.162579 |
| 1GEN | A | TYR | 637 | E | -13.775647 | 14.943007 | -13.393474 | -2.776487 |
| 1GEN | A | LEU | 638 | E | -14.792876 | 16.139827 | -14.609455 | -2.962013 |
| 1GEN | A | LYS | 639 | E | -14.649109 | 13.574704 | -16.301578 | -3.462407 |
| 1GEN | A | LEU | 640 | E | -11.936982 | 8.359267  | -16.550949 | -4.626886 |

|      |   |     |     |   |            |           |            |           |
|------|---|-----|-----|---|------------|-----------|------------|-----------|
| 1GEN | A | GLU | 641 | E | -10.798935 | 8.206899  | -16.358925 | -5.409527 |
| 1GEN | A | ASN | 642 | T | -10.304715 | 9.017362  | -14.941724 | -4.721067 |
| 1GEN | A | GLN | 643 | T | -9.489952  | 8.115163  | -11.382644 | -2.562843 |
| 1GEN | A | SER | 644 | T | -9.321334  | 8.721947  | -10.730770 | -2.296172 |
| 1GEN | A | LEU | 645 | T | -8.102577  | 8.971610  | -10.004628 | -3.364651 |
| 1GEN | A | LYS | 646 | T | -6.060206  | 8.801036  | -8.341883  | -4.339301 |
| 1GEN | A | SER | 647 | T | -6.043682  | 8.821332  | -8.379016  | -4.314535 |
| 1GEN | A | VAL | 648 | E | -6.019285  | 8.792441  | -8.334581  | -4.203749 |
| 1GEN | A | LYS | 649 | E | -6.018706  | 8.791343  | -8.335356  | -4.201032 |
| 1GEN | A | PHE | 650 | E | -6.034147  | 8.785632  | -8.294704  | -4.219032 |
| 1GEN | A | GLY | 651 | E | -7.582896  | 8.663761  | -8.361868  | -2.287395 |
| 1GEN | A | SER | 652 | E | -7.861577  | 8.137577  | -7.525304  | -1.589131 |
| 1GEN | A | ILE | 653 | H | -9.657813  | 9.081864  | -9.548206  | -1.743738 |
| 1GEN | A | LYS | 654 | H | -10.973294 | 9.030287  | -14.505164 | -4.125813 |
| 1GEN | A | SER | 655 | H | -12.356808 | 9.210358  | -16.926545 | -4.936140 |
| 1GEN | A | ASP | 656 | H | -12.772083 | 16.469145 | -14.499913 | -5.583752 |
| 1GEN | A | TRP | 657 | H | -10.713939 | 16.600340 | -9.393849  | -3.434340 |
| 1GEN | A | LEU | 658 | H | -10.713939 | 16.600340 | -9.393849  | -3.434340 |
| 1GEN | A | GLY | 659 | C | -10.713939 | 16.600340 | -9.393849  | -3.434340 |
| 1GEN | A | CYS | 660 | C | -10.713939 | 16.600340 | -9.393849  | -3.434340 |
| 1GGZ | A | LEU | 4   | C | -4.778484  | 5.253219  | -8.577129  | -3.778734 |
| 1GGZ | A | THR | 5   | C | -4.778484  | 5.253219  | -8.577129  | -3.778734 |
| 1GGZ | A | GLU | 6   | H | -4.778484  | 5.253219  | -8.577129  | -3.778734 |
| 1GGZ | A | GLU | 7   | H | -4.778484  | 5.253219  | -8.577129  | -3.778734 |
| 1GGZ | A | GLN | 8   | H | -6.004975  | 7.287825  | -11.061928 | -5.058359 |
| 1GGZ | A | VAL | 9   | H | -6.670197  | 8.661992  | -12.080034 | -5.778154 |
| 1GGZ | A | THR | 10  | H | -7.077409  | 9.254675  | -12.514487 | -6.221811 |
| 1GGZ | A | GLU | 11  | H | -8.338340  | 10.313931 | -14.583039 | -6.906634 |
| 1GGZ | A | PHE | 12  | H | -9.526021  | 11.930606 | -14.045314 | -5.520471 |
| 1GGZ | A | LYS | 13  | H | -9.567519  | 11.590050 | -13.716733 | -5.151436 |
| 1GGZ | A | GLU | 14  | H | -9.581319  | 11.183823 | -13.653570 | -4.976557 |
| 1GGZ | A | ALA | 15  | H | -10.131396 | 11.671331 | -13.770411 | -4.735484 |
| 1GGZ | A | PHE | 16  | H | -10.712908 | 11.229044 | -14.134393 | -4.281260 |
| 1GGZ | A | SER | 17  | H | -10.589144 | 11.323224 | -14.251709 | -4.382941 |
| 1GGZ | A | LEU | 18  | H | -10.688510 | 11.201281 | -14.523066 | -4.469067 |
| 1GGZ | A | PHE | 19  | H | -9.925729  | 11.084156 | -14.384031 | -5.486033 |
| 1GGZ | A | ASP | 20  | T | -7.958801  | 4.750190  | -14.935692 | -5.527234 |
| 1GGZ | A | LYS | 21  | T | -5.614245  | 3.161786  | -12.573849 | -5.424212 |
| 1GGZ | A | ASP | 22  | T | -4.839051  | 2.478843  | -12.076685 | -5.231917 |
| 1GGZ | A | GLY | 23  | T | -4.803799  | 2.690792  | -12.041548 | -5.216475 |
| 1GGZ | A | ASP | 24  | C | -4.802124  | 2.705116  | -12.043805 | -5.215909 |
| 1GGZ | A | GLY | 25  | C | -4.804391  | 2.703559  | -12.030502 | -5.214403 |
| 1GGZ | A | CYS | 26  | E | -4.974444  | 2.567271  | -11.863072 | -5.143797 |
| 1GGZ | A | ILE | 27  | E | -6.446661  | 6.357107  | -11.558765 | -4.963021 |
| 1GGZ | A | THR | 28  | C | -7.960947  | 8.951638  | -12.754176 | -4.977536 |
| 1GGZ | A | THR | 29  | H | -8.503966  | 10.609476 | -12.567181 | -4.878674 |
| 1GGZ | A | ARG | 30  | H | -8.829831  | 10.461156 | -12.710206 | -4.648020 |
| 1GGZ | A | GLU | 31  | H | -9.298163  | 10.683895 | -13.521755 | -4.824138 |
| 1GGZ | A | LEU | 32  | H | -9.410454  | 11.843654 | -13.462576 | -5.052826 |
| 1GGZ | A | GLY | 33  | H | -9.315547  | 11.999199 | -14.944991 | -6.342396 |
| 1GGZ | A | THR | 34  | H | -9.240071  | 12.245145 | -15.601496 | -6.999909 |
| 1GGZ | A | VAL | 35  | H | -9.260899  | 12.372347 | -15.728368 | -7.131974 |
| 1GGZ | A | MET | 36  | H | -9.014752  | 10.429829 | -15.650724 | -6.448286 |
| 1GGZ | A | ARG | 37  | H | -7.322700  | 4.606368  | -12.952202 | -4.475165 |
| 1GGZ | A | SER | 38  | H | -4.103140  | 4.006179  | -8.776012  | -4.372827 |
| 1GGZ | A | LEU | 39  | H | -3.600021  | 5.760619  | -7.790950  | -4.423309 |
| 1GGZ | A | GLY | 40  | C | -3.543720  | 5.862127  | -7.883079  | -4.449690 |
| 1GGZ | A | GLN | 41  | C | -3.525133  | 5.945662  | -7.908885  | -4.457727 |
| 1GGZ | A | ASN | 42  | C | -3.411256  | 6.094440  | -7.845494  | -4.419679 |
| 1GGZ | A | PRO | 43  | C | -3.626087  | 7.025223  | -7.444435  | -4.430479 |
| 1GGZ | A | THR | 44  | C | -4.157389  | 6.960901  | -8.059531  | -4.386858 |
| 1GGZ | A | GLU | 45  | H | -4.331404  | 6.994393  | -7.813277  | -4.280077 |
| 1GGZ | A | ALA | 46  | H | -4.407188  | 6.783019  | -7.693185  | -4.223774 |
| 1GGZ | A | GLU | 47  | H | -6.086645  | 7.339225  | -10.068455 | -4.310916 |
| 1GGZ | A | LEU | 48  | H | -6.677954  | 7.816115  | -10.270119 | -4.440241 |
| 1GGZ | A | ARG | 49  | H | -9.663081  | 9.789515  | -15.540511 | -5.664606 |
| 1GGZ | A | ASP | 50  | H | -10.236101 | 9.739638  | -16.458160 | -5.912328 |
| 1GGZ | A | MET | 51  | H | -10.983734 | 11.722548 | -17.847828 | -6.913580 |
| 1GGZ | A | MET | 52  | H | -11.271720 | 10.429125 | -16.754867 | -5.338970 |
| 1GGZ | A | SER | 53  | H | -10.850196 | 9.703942  | -16.670619 | -5.277675 |
| 1GGZ | A | GLU | 54  | H | -10.540323 | 9.237252  | -16.521203 | -5.194617 |
| 1GGZ | A | ILE | 55  | C | -9.378697  | 7.689401  | -14.779282 | -4.944317 |
| 1GGZ | A | ASP | 56  | T | -8.143467  | 3.383860  | -15.445170 | -5.017566 |
| 1GGZ | A | ARG | 57  | T | -5.946781  | 1.581179  | -13.324611 | -5.013883 |
| 1GGZ | A | ASP | 58  | T | -4.338290  | 2.676354  | -11.051943 | -5.230398 |
| 1GGZ | A | GLY | 59  | T | -4.284912  | 2.961174  | -11.015268 | -5.209243 |
| 1GGZ | A | ASN | 60  | C | -4.283325  | 2.973688  | -11.018931 | -5.209017 |
| 1GGZ | A | GLY | 61  | C | -4.284078  | 2.974272  | -11.013068 | -5.209240 |
| 1GGZ | A | THR | 62  | C | -4.320080  | 3.064995  | -10.870540 | -5.221005 |
| 1GGZ | A | VAL | 63  | E | -5.718056  | 6.042529  | -10.674576 | -4.981634 |
| 1GGZ | A | ASP | 64  | E | -7.732186  | 7.883708  | -12.475586 | -5.087564 |

|      |   |     |     |   |            |           |            |           |
|------|---|-----|-----|---|------------|-----------|------------|-----------|
| 1GGZ | A | PHE | 65  | H | -9.562026  | 13.317113 | -12.149996 | -4.711255 |
| 1GGZ | A | PRO | 66  | H | -9.699514  | 13.199011 | -12.059910 | -4.595278 |
| 1GGZ | A | GLU | 67  | H | -10.348094 | 13.107783 | -12.887227 | -4.669953 |
| 1GGZ | A | PHE | 68  | H | -11.169559 | 15.883573 | -13.511269 | -5.152251 |
| 1GGZ | A | LEU | 69  | H | -10.767199 | 14.255840 | -13.808167 | -5.210655 |
| 1GGZ | A | GLY | 70  | H | -10.728352 | 13.802816 | -14.102022 | -5.221468 |
| 1GGZ | A | MET | 71  | H | -10.842588 | 13.281561 | -14.458002 | -5.254938 |
| 1GGZ | A | MET | 72  | H | -10.839996 | 13.232743 | -14.488823 | -5.250892 |
| 1GGZ | A | ALA | 73  | H | -10.918126 | 12.516646 | -14.734859 | -5.212043 |
| 1GGZ | A | ARG | 74  | H | -11.758945 | 10.015452 | -17.261320 | -5.128521 |
| 1GGZ | A | LYS | 75  | H | -11.057846 | 6.331354  | -17.699961 | -4.982192 |
| 1GGZ | A | MET | 76  | H | -10.368785 | 5.409236  | -17.318645 | -4.942570 |
| 1GGZ | A | LYS | 77  | H | -9.235049  | 4.648119  | -16.037582 | -4.857017 |
| 1GGZ | A | ASP | 78  | H | -8.664418  | 4.961412  | -15.441104 | -4.886965 |
| 1GGZ | A | THR | 79  | H | -8.648679  | 4.974570  | -15.502697 | -4.897564 |
| 1GGZ | A | ASP | 80  | H | -8.653524  | 4.971550  | -15.492297 | -4.901053 |
| 1GGZ | A | ASN | 81  | H | -8.674889  | 4.975252  | -15.434824 | -4.901754 |
| 1GGZ | A | GLU | 82  | H | -8.913232  | 5.202340  | -15.246059 | -4.931259 |
| 1GGZ | A | GLU | 83  | H | -10.588360 | 5.985237  | -18.001074 | -5.343836 |
| 1GGZ | A | GLU | 84  | H | -11.277552 | 7.267787  | -18.427949 | -5.451142 |
| 1GGZ | A | ILE | 85  | H | -11.730701 | 8.581355  | -17.785152 | -5.238990 |
| 1GGZ | A | ARG | 86  | H | -12.756023 | 10.074503 | -18.630713 | -5.063538 |
| 1GGZ | A | GLU | 87  | H | -11.708883 | 10.819793 | -15.477867 | -4.449169 |
| 1GGZ | A | ALA | 88  | H | -11.716983 | 11.163513 | -15.206794 | -4.390976 |
| 1GGZ | A | PHE | 89  | H | -11.749220 | 11.244890 | -15.029667 | -4.355498 |
| 1GGZ | A | ARG | 90  | H | -11.608124 | 11.468927 | -15.161817 | -4.432875 |
| 1GGZ | A | VAL | 91  | H | -11.146413 | 11.647599 | -14.970027 | -4.673162 |
| 1GGZ | A | PHE | 92  | H | -10.109449 | 10.526802 | -14.536272 | -5.270415 |
| 1GGZ | A | ASP | 93  | T | -7.582198  | 3.590261  | -14.722829 | -5.311885 |
| 1GGZ | A | LYS | 94  | T | -5.027275  | 2.496306  | -11.878058 | -5.204461 |
| 1GGZ | A | ASP | 95  | T | -4.952228  | 2.722754  | -11.944974 | -5.214758 |
| 1GGZ | A | GLY | 96  | T | -4.943970  | 2.788821  | -11.945674 | -5.210983 |
| 1GGZ | A | ASN | 97  | C | -4.944027  | 2.788030  | -11.945484 | -5.210959 |
| 1GGZ | A | GLY | 98  | C | -4.950867  | 2.779924  | -11.913148 | -5.209744 |
| 1GGZ | A | PHE | 99  | C | -6.147254  | 4.729579  | -12.390858 | -5.251658 |
| 1GGZ | A | VAL | 100 | B | -7.471809  | 7.518836  | -12.030385 | -4.934400 |
| 1GGZ | A | SER | 101 | C | -9.845995  | 9.275040  | -14.710506 | -4.573538 |
| 1GGZ | A | ALA | 102 | H | -9.963957  | 9.341653  | -14.509764 | -4.462314 |
| 1GGZ | A | ALA | 103 | H | -9.991092  | 9.296979  | -14.487011 | -4.463253 |
| 1GGZ | A | GLU | 104 | H | -10.071177 | 9.152032  | -14.499084 | -4.495303 |
| 1GGZ | A | LEU | 105 | H | -10.511698 | 10.603314 | -14.528626 | -4.852944 |
| 1GGZ | A | ARG | 106 | H | -9.867939  | 14.829230 | -15.465387 | -8.094773 |
| 1GGZ | A | HIS | 107 | H | -8.006729  | 14.346179 | -13.058520 | -7.690723 |
| 1GGZ | A | VAL | 108 | H | -7.808667  | 13.650605 | -12.345709 | -6.761294 |
| 1GGZ | A | MET | 109 | H | -6.467432  | 9.698405  | -9.751215  | -4.835645 |
| 1GGZ | A | THR | 110 | H | -4.561165  | 7.019244  | -7.850997  | -4.343553 |
| 1GGZ | A | ARG | 111 | H | -3.431817  | 6.340574  | -6.656803  | -4.103788 |
| 1GGZ | A | LEU | 112 | H | -3.252061  | 6.633460  | -6.759521  | -4.206833 |
| 1GGZ | A | GLY | 113 | C | -3.246178  | 6.632583  | -6.794978  | -4.212454 |
| 1GGZ | A | GLU | 114 | C | -3.248224  | 6.622476  | -6.787050  | -4.211098 |
| 1GGZ | A | LYS | 115 | C | -3.313938  | 6.583042  | -6.668464  | -4.194582 |
| 1GGZ | A | LEU | 116 | C | -4.024657  | 7.395940  | -7.158586  | -4.487872 |
| 1GGZ | A | SER | 117 | C | -5.914392  | 6.597343  | -10.551316 | -4.748790 |
| 1GGZ | A | ASP | 118 | H | -7.245889  | 6.937713  | -12.825010 | -4.862325 |
| 1GGZ | A | GLU | 119 | H | -7.556197  | 6.625542  | -13.123392 | -4.828028 |
| 1GGZ | A | GLU | 120 | H | -8.212821  | 7.295099  | -13.674497 | -4.920448 |
| 1GGZ | A | VAL | 121 | H | -8.273064  | 7.302342  | -13.435004 | -4.852566 |
| 1GGZ | A | ASP | 122 | H | -9.340149  | 7.856991  | -15.147612 | -5.271741 |
| 1GGZ | A | GLU | 123 | H | -9.970487  | 8.807787  | -15.021393 | -4.654360 |
| 1GGZ | A | MET | 124 | H | -9.998346  | 9.870088  | -13.719898 | -4.057283 |
| 1GGZ | A | ILE | 125 | H | -9.818283  | 9.774714  | -13.403432 | -3.874774 |
| 1GGZ | A | ARG | 126 | H | -9.583179  | 9.013470  | -13.761718 | -3.969940 |
| 1GGZ | A | ALA | 127 | H | -9.497897  | 8.715401  | -14.048615 | -4.068127 |
| 1GGZ | A | ALA | 128 | H | -8.908053  | 6.816288  | -14.728647 | -4.763316 |
| 1GGZ | A | ASP | 129 | T | -8.212655  | 4.575087  | -15.524977 | -5.246670 |
| 1GGZ | A | THR | 130 | T | -6.266407  | 2.889136  | -13.549624 | -5.373262 |
| 1GGZ | A | ASP | 131 | T | -6.006050  | 3.355034  | -13.516382 | -5.452351 |
| 1GGZ | A | GLY | 132 | T | -5.926667  | 3.859695  | -13.308062 | -5.410662 |
| 1GGZ | A | ASP | 133 | C | -5.929263  | 3.850746  | -13.301018 | -5.412385 |
| 1GGZ | A | GLY | 134 | C | -5.938231  | 3.852318  | -13.262885 | -5.412301 |
| 1GGZ | A | GLN | 135 | C | -6.416161  | 5.121382  | -13.002242 | -5.456047 |
| 1GGZ | A | VAL | 136 | B | -7.153871  | 7.383254  | -11.875108 | -5.119131 |
| 1GGZ | A | ASN | 137 | C | -10.787398 | 9.505295  | -16.208602 | -5.563979 |
| 1GGZ | A | TYR | 138 | H | -12.418220 | 13.661679 | -16.802779 | -5.744901 |
| 1GGZ | A | GLU | 139 | H | -12.761530 | 14.405300 | -18.526746 | -6.740996 |
| 1GGZ | A | GLU | 140 | H | -11.793834 | 14.712009 | -16.199049 | -6.476674 |
| 1GGZ | A | PHE | 141 | H | -8.758445  | 12.451562 | -11.043509 | -4.926019 |
| 1GGZ | A | VAL | 142 | H | -6.447660  | 6.851581  | -9.801069  | -3.948712 |
| 1GGZ | A | ARG | 143 | H | -5.715375  | 5.728211  | -9.301395  | -3.518144 |
| 1GGZ | A | VAL | 144 | H | -3.340948  | 4.241947  | -5.215206  | -2.415148 |
| 1GGZ | A | LEU | 145 | H | -3.340948  | 4.241947  | -5.215206  | -2.415148 |

|      |   |     |     |   |            |           |            |           |
|------|---|-----|-----|---|------------|-----------|------------|-----------|
| 1GGZ | A | VAL | 146 | C | -3.340948  | 4.241947  | -5.215206  | -2.415148 |
| 1GGZ | A | SER | 147 | C | -3.340948  | 4.241947  | -5.215206  | -2.415148 |
| 1GH2 | A | VAL | 2   | C | -3.760248  | 4.507322  | -8.028623  | -3.826098 |
| 1GH2 | A | GLY | 3   | C | -3.760248  | 4.507322  | -8.028623  | -3.826098 |
| 1GH2 | A | VAL | 4   | C | -3.760248  | 4.507322  | -8.028623  | -3.826098 |
| 1GH2 | A | LYS | 5   | E | -3.760248  | 4.507322  | -8.028623  | -3.826098 |
| 1GH2 | A | PRO | 6   | E | -4.199674  | 4.760981  | -8.480793  | -4.167599 |
| 1GH2 | A | VAL | 7   | E | -5.826911  | 7.748333  | -10.849615 | -5.339299 |
| 1GH2 | A | GLY | 8   | C | -6.029202  | 6.886016  | -11.707162 | -5.510540 |
| 1GH2 | A | SER | 9   | C | -6.806501  | 4.160368  | -12.472297 | -4.475825 |
| 1GH2 | A | ASP | 10  | G | -6.817247  | 4.075865  | -12.407626 | -4.429306 |
| 1GH2 | A | PRO | 11  | G | -6.813852  | 4.114587  | -12.405028 | -4.429006 |
| 1GH2 | A | ASP | 12  | G | -6.820864  | 4.088107  | -12.380841 | -4.429085 |
| 1GH2 | A | PHE | 13  | H | -9.476699  | 10.271836 | -13.370979 | -4.585396 |
| 1GH2 | A | GLN | 14  | H | -9.524594  | 10.290516 | -13.287156 | -4.583665 |
| 1GH2 | A | PRO | 15  | H | -9.382941  | 10.157292 | -13.302212 | -4.596887 |
| 1GH2 | A | GLU | 16  | H | -9.741981  | 10.670005 | -13.879031 | -4.834628 |
| 1GH2 | A | LEU | 17  | H | -8.851087  | 8.180045  | -13.537693 | -4.601070 |
| 1GH2 | A | SER | 18  | H | -7.878622  | 4.566688  | -13.866789 | -4.394419 |
| 1GH2 | A | GLY | 19  | H | -7.756581  | 4.574702  | -13.894260 | -4.328067 |
| 1GH2 | A | ALA | 20  | T | -7.763793  | 4.498300  | -13.898085 | -4.315834 |
| 1GH2 | A | GLY | 21  | T | -7.769022  | 4.438060  | -13.899040 | -4.309100 |
| 1GH2 | A | SER | 22  | T | -7.848981  | 3.995566  | -13.961907 | -4.274654 |
| 1GH2 | A | ARG | 23  | T | -8.712721  | 4.959540  | -14.012922 | -4.041312 |
| 1GH2 | A | LEU | 24  | E | -10.332006 | 10.405384 | -13.725690 | -4.058865 |
| 1GH2 | A | ALA | 25  | E | -11.081652 | 13.650309 | -13.303722 | -4.063260 |
| 1GH2 | A | VAL | 26  | E | -11.395262 | 17.309098 | -12.010867 | -4.169329 |
| 1GH2 | A | VAL | 27  | E | -11.553611 | 18.740197 | -11.831884 | -4.499969 |
| 1GH2 | A | LYS | 28  | E | -11.558160 | 18.762457 | -12.114530 | -4.727142 |
| 1GH2 | A | PHE | 29  | E | -8.617391  | 11.854771 | -11.280983 | -4.980037 |
| 1GH2 | A | THR | 30  | E | -6.597759  | 5.692272  | -11.961099 | -4.934990 |
| 1GH2 | A | MET | 31  | T | -4.880600  | 3.638102  | -10.683101 | -4.773384 |
| 1GH2 | A | ARG | 32  | T | -4.574732  | 3.676762  | -10.439672 | -4.558386 |
| 1GH2 | A | GLY | 33  | T | -4.571495  | 3.682771  | -10.458594 | -4.561275 |
| 1GH2 | A | CYS | 34  | T | -4.571222  | 3.676505  | -10.463041 | -4.560842 |
| 1GH2 | A | GLY | 35  | H | -4.585752  | 3.632732  | -10.421717 | -4.542767 |
| 1GH2 | A | PRO | 36  | H | -5.092054  | 3.787547  | -10.165335 | -4.241877 |
| 1GH2 | A | CYS | 37  | H | -7.062631  | 5.432529  | -12.669163 | -4.343783 |
| 1GH2 | A | LEU | 38  | H | -7.205764  | 6.306579  | -11.632631 | -3.779956 |
| 1GH2 | A | ARG | 39  | H | -7.225365  | 6.819489  | -11.162529 | -3.626808 |
| 1GH2 | A | ILE | 40  | H | -7.834639  | 9.229493  | -10.433262 | -3.346203 |
| 1GH2 | A | ALA | 41  | H | -7.847076  | 9.219574  | -10.393877 | -3.338591 |
| 1GH2 | A | PRO | 42  | H | -7.909489  | 9.186414  | -10.220737 | -3.275007 |
| 1GH2 | A | ALA | 43  | H | -8.493831  | 10.487416 | -10.180354 | -3.410123 |
| 1GH2 | A | PHE | 44  | H | -9.694361  | 13.538077 | -10.956883 | -3.925249 |
| 1GH2 | A | SER | 45  | H | -10.448464 | 11.541270 | -13.040530 | -3.958685 |
| 1GH2 | A | SER | 46  | H | -10.874386 | 10.060382 | -15.551124 | -4.698780 |
| 1GH2 | A | MET | 47  | H | -11.148462 | 9.310052  | -16.762568 | -5.244537 |
| 1GH2 | A | SER | 48  | H | -10.828180 | 9.096805  | -16.716514 | -5.251362 |
| 1GH2 | A | ASN | 49  | H | -10.565700 | 8.714495  | -16.754051 | -5.225907 |
| 1GH2 | A | LYS | 50  | H | -9.901762  | 10.253300 | -14.489738 | -4.979033 |
| 1GH2 | A | TYR | 51  | T | -9.790834  | 11.047055 | -13.848053 | -4.832931 |
| 1GH2 | A | PRO | 52  | T | -9.608131  | 11.800827 | -13.220737 | -4.671150 |
| 1GH2 | A | GLN | 53  | T | -9.636823  | 12.009677 | -13.021379 | -4.637460 |
| 1GH2 | A | ALA | 54  | T | -9.676079  | 12.400967 | -12.707486 | -4.594186 |
| 1GH2 | A | VAL | 55  | E | -10.053022 | 13.805829 | -11.963727 | -4.352658 |
| 1GH2 | A | PHE | 56  | E | -10.339949 | 14.259495 | -11.596011 | -4.269731 |
| 1GH2 | A | LEU | 57  | E | -11.670959 | 18.121512 | -12.664780 | -4.736076 |
| 1GH2 | A | GLU | 58  | E | -10.952145 | 14.281415 | -13.657205 | -5.027669 |
| 1GH2 | A | VAL | 59  | E | -10.105656 | 11.343613 | -13.660021 | -4.768879 |
| 1GH2 | A | ASP | 60  | E | -9.639117  | 9.997408  | -14.215388 | -4.929836 |
| 1GH2 | A | VAL | 61  | T | -9.254006  | 8.959718  | -14.338755 | -4.842103 |
| 1GH2 | A | HIS | 62  | T | -8.839252  | 7.252630  | -14.963230 | -4.994339 |
| 1GH2 | A | GLN | 63  | T | -8.838597  | 7.131821  | -15.040005 | -5.003183 |
| 1GH2 | A | CYS | 64  | T | -8.836203  | 6.841851  | -15.235651 | -5.031424 |
| 1GH2 | A | GLN | 65  | H | -8.191087  | 6.493626  | -13.719578 | -4.575022 |
| 1GH2 | A | GLY | 66  | H | -6.965058  | 5.723106  | -11.710604 | -4.206604 |
| 1GH2 | A | THR | 67  | H | -6.964832  | 5.760216  | -11.673749 | -4.192375 |
| 1GH2 | A | ALA | 68  | H | -6.871854  | 5.573435  | -11.940429 | -4.212604 |
| 1GH2 | A | ALA | 69  | H | -6.725921  | 5.653551  | -12.031017 | -4.262491 |
| 1GH2 | A | THR | 70  | H | -6.705454  | 5.648031  | -12.071230 | -4.282685 |
| 1GH2 | A | ASN | 71  | C | -7.125818  | 5.759609  | -12.963248 | -4.480328 |
| 1GH2 | A | ASN | 72  | C | -5.667725  | 7.420176  | -9.231085  | -4.304551 |
| 1GH2 | A | ILE | 73  | C | -5.655825  | 7.597158  | -9.157342  | -4.294338 |
| 1GH2 | A | SER | 74  | C | -5.675877  | 7.668501  | -9.044479  | -4.289528 |
| 1GH2 | A | ALA | 75  | T | -5.685502  | 7.694313  | -8.977680  | -4.285044 |
| 1GH2 | A | THR | 76  | T | -5.692121  | 7.708508  | -8.927113  | -4.280122 |
| 1GH2 | A | PRO | 77  | T | -7.537802  | 10.595550 | -9.601274  | -4.097243 |
| 1GH2 | A | THR | 78  | E | -9.079302  | 10.819379 | -11.990941 | -4.609023 |
| 1GH2 | A | PHE | 79  | E | -11.479781 | 15.944615 | -12.648097 | -4.819040 |
| 1GH2 | A | GLN | 80  | E | -13.979136 | 17.798809 | -16.304087 | -5.704702 |

|      |   |     |     |   |            |           |            |           |
|------|---|-----|-----|---|------------|-----------|------------|-----------|
| 1GH2 | A | PHE | 81  | E | -14.395482 | 19.122365 | -16.190043 | -5.601570 |
| 1GH2 | A | PHE | 82  | E | -11.118197 | 12.299087 | -14.361735 | -5.051513 |
| 1GH2 | A | ARG | 83  | E | -9.973892  | 9.628841  | -14.637391 | -5.087507 |
| 1GH2 | A | ASN | 84  | T | -8.160667  | 8.721844  | -12.153089 | -4.725517 |
| 1GH2 | A | LYS | 85  | T | -8.131261  | 8.743422  | -12.251101 | -4.730987 |
| 1GH2 | A | VAL | 86  | E | -8.123188  | 8.733173  | -12.300934 | -4.734243 |
| 1GH2 | A | ARG | 87  | E | -8.126943  | 8.710680  | -12.288032 | -4.732267 |
| 1GH2 | A | ILE | 88  | E | -8.149403  | 8.695669  | -12.196865 | -4.718975 |
| 1GH2 | A | ASP | 89  | E | -9.766270  | 8.973972  | -14.620468 | -4.890882 |
| 1GH2 | A | GLN | 90  | E | -10.512426 | 8.954037  | -16.039692 | -5.167385 |
| 1GH2 | A | TYR | 91  | E | -10.240236 | 10.724809 | -14.859863 | -5.363564 |
| 1GH2 | A | GLN | 92  | E | -8.302021  | 7.922639  | -12.791502 | -4.763113 |
| 1GH2 | A | GLY | 93  | C | -6.338710  | 5.883530  | -10.334067 | -4.002645 |
| 1GH2 | A | ALA | 94  | C | -5.456141  | 5.794208  | -9.613646  | -4.047719 |
| 1GH2 | A | ASP | 95  | C | -5.440396  | 5.853395  | -9.651986  | -4.054514 |
| 1GH2 | A | ALA | 96  | H | -5.439903  | 5.856902  | -9.654618  | -4.055180 |
| 1GH2 | A | VAL | 97  | H | -5.444106  | 5.843625  | -9.634085  | -4.050605 |
| 1GH2 | A | GLY | 98  | H | -5.585967  | 5.853375  | -9.469399  | -4.071166 |
| 1GH2 | A | LEU | 99  | H | -7.559758  | 8.156058  | -11.244643 | -4.353601 |
| 1GH2 | A | GLU | 100 | H | -9.216412  | 9.714082  | -13.782881 | -5.059478 |
| 1GH2 | A | GLU | 101 | H | -9.819083  | 8.907956  | -14.745783 | -5.240042 |
| 1GH2 | A | LYS | 102 | H | -12.531899 | 13.167691 | -18.252709 | -6.465621 |
| 1GH2 | A | ILE | 103 | H | -11.395919 | 14.732663 | -15.488923 | -6.531799 |
| 1GH2 | A | LYS | 104 | H | -9.993558  | 10.905767 | -14.826582 | -5.790393 |
| 1GH2 | A | GLN | 105 | H | -8.286758  | 9.169501  | -11.896812 | -4.569484 |
| 1GH2 | A | HIS | 106 | H | -8.286758  | 9.169501  | -11.896812 | -4.569484 |
| 1GH2 | A | LEU | 107 | H | -8.286758  | 9.169501  | -11.896812 | -4.569484 |
| 1GH2 | A | GLU | 108 | C | -8.286758  | 9.169501  | -11.896812 | -4.569484 |
| 1GLO | A | LEU | 1   | C | -5.091884  | 3.896805  | -8.249970  | -2.796585 |
| 1GLO | A | PRO | 2   | T | -5.091884  | 3.896805  | -8.249970  | -2.796585 |
| 1GLO | A | ASP | 3   | T | -5.091884  | 3.896805  | -8.249970  | -2.796585 |
| 1GLO | A | SER | 4   | T | -5.091884  | 3.896805  | -8.249970  | -2.796585 |
| 1GLO | A | VAL | 5   | E | -6.825076  | 5.767985  | -10.132358 | -3.364018 |
| 1GLO | A | ASP | 6   | E | -9.175948  | 7.907524  | -13.974204 | -4.701211 |
| 1GLO | A | TRP | 7   | G | -10.120575 | 11.146474 | -14.456117 | -5.135848 |
| 1GLO | A | ARG | 8   | G | -8.412997  | 7.816353  | -13.779832 | -5.332658 |
| 1GLO | A | GLU | 9   | G | -7.559546  | 8.668997  | -12.064883 | -5.005115 |
| 1GLO | A | LYS | 10  | G | -7.532042  | 8.766111  | -12.109829 | -5.016885 |
| 1GLO | A | GLY | 11  | C | -7.179578  | 8.866459  | -11.842259 | -5.006964 |
| 1GLO | A | CYS | 12  | C | -6.823868  | 9.873064  | -10.736919 | -4.808751 |
| 1GLO | A | VAL | 13  | C | -6.817380  | 10.138568 | -10.576863 | -4.790465 |
| 1GLO | A | THR | 14  | C | -6.915851  | 10.575649 | -10.383564 | -4.788826 |
| 1GLO | A | GLU | 15  | C | -6.924951  | 10.572732 | -10.343708 | -4.781836 |
| 1GLO | A | VAL | 16  | C | -7.130575  | 11.224259 | -9.853762  | -4.693614 |
| 1GLO | A | LYS | 17  | C | -7.975828  | 11.629497 | -11.265451 | -5.086278 |
| 1GLO | A | TYR | 18  | B | -8.155427  | 10.131896 | -12.358320 | -5.151807 |
| 1GLO | A | GLN | 19  | T | -7.919259  | 5.107062  | -14.700337 | -5.226230 |
| 1GLO | A | GLY | 20  | T | -6.868928  | 4.541827  | -12.763397 | -4.580066 |
| 1GLO | A | SER | 21  | T | -6.860640  | 4.558417  | -12.792279 | -4.579622 |
| 1GLO | A | CYS | 22  | T | -6.861011  | 4.555593  | -12.789809 | -4.579023 |
| 1GLO | A | GLY | 23  | T | -6.885476  | 4.444156  | -12.735296 | -4.555254 |
| 1GLO | A | ALA | 24  | H | -6.968179  | 4.462376  | -12.412882 | -4.451192 |
| 1GLO | A | SER | 25  | H | -9.372975  | 5.975823  | -14.862484 | -4.571434 |
| 1GLO | A | TRP | 26  | H | -11.810729 | 12.722701 | -14.902640 | -4.673540 |
| 1GLO | A | ALA | 27  | H | -11.578434 | 14.085831 | -13.968113 | -4.534385 |
| 1GLO | A | PHE | 28  | H | -11.287688 | 15.476882 | -12.956167 | -4.715124 |
| 1GLO | A | SER | 29  | H | -10.910333 | 13.473387 | -13.497111 | -4.502449 |
| 1GLO | A | ALA | 30  | H | -10.249630 | 13.706393 | -11.957055 | -4.086435 |
| 1GLO | A | VAL | 31  | H | -10.240168 | 13.708294 | -12.003286 | -4.095591 |
| 1GLO | A | GLY | 32  | H | -10.245176 | 13.582733 | -12.071989 | -4.104485 |
| 1GLO | A | ALA | 33  | H | -10.327063 | 13.358638 | -11.935216 | -3.998826 |
| 1GLO | A | LEU | 34  | H | -10.444553 | 13.790001 | -11.461437 | -3.937997 |
| 1GLO | A | GLU | 35  | H | -12.057168 | 13.340362 | -15.072724 | -4.706562 |
| 1GLO | A | ALA | 36  | H | -12.308007 | 12.947228 | -15.301980 | -4.770041 |
| 1GLO | A | GLN | 37  | H | -13.586506 | 15.882208 | -19.030291 | -6.875061 |
| 1GLO | A | LEU | 38  | H | -10.121213 | 11.764071 | -13.436901 | -5.045807 |
| 1GLO | A | LYS | 39  | H | -6.742880  | 8.024954  | -11.056714 | -5.126263 |
| 1GLO | A | LEU | 40  | H | -5.313950  | 6.963259  | -9.408181  | -4.673977 |
| 1GLO | A | LYS | 41  | H | -4.794811  | 7.683423  | -8.698066  | -4.638807 |
| 1GLO | A | THR | 42  | H | -4.315817  | 8.022741  | -7.885207  | -4.478682 |
| 1GLO | A | GLY | 43  | C | -4.272133  | 8.100477  | -7.944405  | -4.492394 |
| 1GLO | A | LYS | 44  | C | -4.280324  | 8.110507  | -7.897901  | -4.482469 |
| 1GLO | A | LEU | 45  | C | -4.383044  | 8.346214  | -7.641197  | -4.453657 |
| 1GLO | A | VAL | 46  | C | -4.587180  | 8.405322  | -7.413247  | -4.386740 |
| 1GLO | A | SER | 47  | C | -5.824468  | 9.208762  | -8.725821  | -4.663001 |
| 1GLO | A | LEU | 48  | B | -8.027644  | 13.286174 | -9.334945  | -4.552703 |
| 1GLO | A | SER | 49  | C | -9.874354  | 14.210019 | -11.744315 | -4.840209 |
| 1GLO | A | ALA | 50  | H | -11.196527 | 13.693856 | -13.498619 | -4.692384 |
| 1GLO | A | GLN | 51  | H | -12.844812 | 13.622485 | -17.476461 | -5.474914 |
| 1GLO | A | ASN | 52  | H | -12.975081 | 13.396921 | -17.876687 | -5.528357 |
| 1GLO | A | LEU | 53  | H | -12.594406 | 13.294861 | -16.974086 | -5.335957 |



|      |   |     |     |   |            |           |            |           |
|------|---|-----|-----|---|------------|-----------|------------|-----------|
| 1GLO | A | VAL | 54  | H | -11.915713 | 10.440130 | -17.061506 | -5.124889 |
| 1GLO | A | ASP | 55  | H | -10.226063 | 6.946847  | -16.431496 | -5.234302 |
| 1GLO | A | CYS | 56  | H | -6.912666  | 6.309304  | -11.854215 | -4.871882 |
| 1GLO | A | SER | 57  | C | -6.868643  | 6.466886  | -11.911912 | -4.873079 |
| 1GLO | A | THR | 58  | C | -5.581713  | 7.325978  | -9.740528  | -4.757134 |
| 1GLO | A | GLU | 59  | G | -5.562721  | 7.349352  | -9.828238  | -4.778272 |
| 1GLO | A | LYS | 60  | G | -5.562267  | 7.351271  | -9.831282  | -4.778816 |
| 1GLO | A | TYR | 61  | G | -5.625896  | 7.470259  | -9.604527  | -4.768524 |
| 1GLO | A | GLY | 62  | C | -5.627428  | 7.448054  | -9.612381  | -4.771182 |
| 1GLO | A | ASN | 63  | C | -7.410020  | 7.353125  | -13.277215 | -5.394361 |
| 1GLO | A | LYS | 64  | C | -6.371440  | 3.669521  | -12.691939 | -4.852550 |
| 1GLO | A | GLY | 65  | G | -5.469587  | 4.080438  | -11.800354 | -5.037183 |
| 1GLO | A | CYS | 66  | G | -5.366214  | 4.300777  | -11.809011 | -5.031558 |
| 1GLO | A | ASN | 67  | G | -5.342601  | 4.473148  | -11.789800 | -5.041706 |
| 1GLO | A | GLY | 68  | C | -5.336378  | 4.545967  | -11.779686 | -5.046832 |
| 1GLO | A | GLY | 69  | C | -5.440337  | 4.772702  | -11.626999 | -5.091323 |
| 1GLO | A | PHE | 70  | C | -6.249521  | 6.447611  | -11.837929 | -5.097505 |
| 1GLO | A | MET | 71  | H | -6.985557  | 8.886740  | -11.795065 | -5.333427 |
| 1GLO | A | THR | 72  | H | -7.673244  | 9.929397  | -12.086683 | -5.413422 |
| 1GLO | A | THR | 73  | H | -8.480899  | 10.681965 | -12.271668 | -5.310076 |
| 1GLO | A | ALA | 74  | H | -10.330984 | 12.626701 | -13.570657 | -5.055615 |
| 1GLO | A | PHE | 75  | H | -11.382752 | 16.156038 | -13.395369 | -5.288773 |
| 1GLO | A | GLN | 76  | H | -12.168453 | 15.246362 | -14.767273 | -5.217959 |
| 1GLO | A | TYR | 77  | H | -13.167093 | 15.755791 | -16.265069 | -5.302486 |
| 1GLO | A | ILE | 78  | H | -9.979239  | 8.948875  | -14.271547 | -4.747556 |
| 1GLO | A | ILE | 79  | H | -8.873241  | 6.722008  | -14.654121 | -5.009762 |
| 1GLO | A | ASP | 80  | H | -8.513185  | 7.277305  | -14.344912 | -5.065973 |
| 1GLO | A | ASN | 81  | H | -8.505937  | 7.303098  | -14.366476 | -5.068990 |
| 1GLO | A | LYS | 82  | C | -8.499509  | 7.325444  | -14.383323 | -5.068740 |
| 1GLO | A | GLY | 83  | C | -8.548078  | 7.195143  | -14.401936 | -5.098550 |
| 1GLO | A | ILE | 84  | E | -8.941331  | 8.046197  | -14.109458 | -5.135992 |
| 1GLO | A | ASP | 85  | E | -10.406597 | 9.230303  | -16.295687 | -5.163212 |
| 1GLO | A | SER | 86  | B | -10.346807 | 10.083147 | -15.759098 | -5.177653 |
| 1GLO | A | ASP | 87  | G | -9.487444  | 10.071943 | -14.123557 | -5.213707 |
| 1GLO | A | ALA | 88  | G | -9.489562  | 10.111195 | -14.095779 | -5.213550 |
| 1GLO | A | SER | 89  | G | -9.494070  | 10.159922 | -14.066686 | -5.223352 |
| 1GLO | A | TYR | 90  | C | -9.512590  | 10.415521 | -13.906057 | -5.232855 |
| 1GLO | A | PRO | 91  | C | -8.548996  | 11.153733 | -11.728858 | -4.827502 |
| 1GLO | A | TYR | 92  | C | -8.540380  | 11.333012 | -11.646768 | -4.835218 |
| 1GLO | A | LYS | 93  | C | -7.531120  | 8.716140  | -11.690836 | -4.783162 |
| 1GLO | A | ALA | 94  | C | -7.183042  | 7.803243  | -11.877698 | -4.648687 |
| 1GLO | A | MET | 95  | C | -6.294908  | 6.186688  | -11.363738 | -4.626340 |
| 1GLO | A | ASP | 96  | C | -5.898979  | 5.937863  | -11.149903 | -4.589656 |
| 1GLO | A | LEU | 97  | C | -5.897103  | 5.946307  | -11.155307 | -4.590520 |
| 1GLO | A | LYS | 98  | C | -5.927781  | 5.829998  | -11.131209 | -4.581588 |
| 1GLO | A | CYS | 99  | C | -5.960235  | 5.783221  | -11.076519 | -4.587356 |
| 1GLO | A | GLN | 100 | C | -6.304417  | 5.836369  | -10.972326 | -4.562653 |
| 1GLO | A | TYR | 101 | C | -8.583265  | 9.490896  | -13.625398 | -5.160109 |
| 1GLO | A | ASP | 102 | C | -7.752308  | 8.701304  | -12.104615 | -4.912337 |
| 1GLO | A | SER | 103 | G | -7.604020  | 8.962813  | -11.937512 | -4.840136 |
| 1GLO | A | LYS | 104 | G | -7.558058  | 9.142796  | -11.912024 | -4.825624 |
| 1GLO | A | TYR | 105 | G | -7.561655  | 9.175695  | -11.874359 | -4.818798 |
| 1GLO | A | ARG | 106 | E | -7.581577  | 9.177261  | -11.796981 | -4.787454 |
| 1GLO | A | ALA | 107 | E | -7.901512  | 10.397547 | -11.455921 | -4.559723 |
| 1GLO | A | ALA | 108 | E | -7.838529  | 10.342508 | -11.389407 | -4.573350 |
| 1GLO | A | THR | 109 | C | -7.876931  | 10.394607 | -11.396039 | -4.610476 |
| 1GLO | A | CYS | 110 | C | -7.852824  | 10.420529 | -11.467931 | -4.644259 |
| 1GLO | A | SER | 111 | C | -7.300725  | 10.993817 | -10.807636 | -4.969794 |
| 1GLO | A | LYS | 112 | E | -7.102185  | 12.688849 | -9.900241  | -5.117099 |
| 1GLO | A | TYR | 113 | E | -7.077409  | 13.479183 | -9.492169  | -5.128881 |
| 1GLO | A | THR | 114 | E | -6.998109  | 13.459282 | -9.451444  | -5.059352 |
| 1GLO | A | GLU | 115 | E | -6.795306  | 13.225032 | -9.320209  | -4.963493 |
| 1GLO | A | LEU | 116 | C | -6.967020  | 13.859806 | -8.962258  | -4.879102 |
| 1GLO | A | PRO | 117 | T | -7.187336  | 13.243551 | -9.163107  | -4.735663 |
| 1GLO | A | TYR | 118 | T | -7.323158  | 12.766768 | -9.275021  | -4.708504 |
| 1GLO | A | GLY | 119 | T | -7.476292  | 12.500440 | -9.313802  | -4.726413 |
| 1GLO | A | ARG | 120 | T | -9.154081  | 10.521168 | -12.601148 | -4.414183 |
| 1GLO | A | GLU | 121 | H | -9.730370  | 7.943834  | -14.947572 | -4.755706 |
| 1GLO | A | ASP | 122 | H | -9.741542  | 7.915519  | -14.947399 | -4.760758 |
| 1GLO | A | VAL | 123 | H | -9.729321  | 8.143577  | -14.822779 | -4.738533 |
| 1GLO | A | LEU | 124 | H | -10.707781 | 11.959204 | -14.508101 | -4.679134 |
| 1GLO | A | LYS | 125 | H | -10.988858 | 12.548799 | -14.626056 | -4.740896 |
| 1GLO | A | GLU | 126 | H | -8.845148  | 10.143161 | -11.224872 | -3.943124 |
| 1GLO | A | ALA | 127 | H | -8.701230  | 10.259213 | -11.397361 | -3.994464 |
| 1GLO | A | VAL | 128 | H | -8.195534  | 10.121026 | -11.521602 | -4.355036 |
| 1GLO | A | ALA | 129 | H | -7.918406  | 10.449671 | -11.373647 | -4.469514 |
| 1GLO | A | ASN | 130 | H | -7.813887  | 10.711281 | -11.309554 | -4.488752 |
| 1GLO | A | LYS | 131 | H | -7.912721  | 10.890515 | -11.362977 | -4.607146 |
| 1GLO | A | GLY | 132 | C | -7.918388  | 11.019683 | -11.277671 | -4.597348 |
| 1GLO | A | PRO | 133 | C | -8.169239  | 11.629039 | -11.080439 | -4.565804 |
| 1GLO | A | VAL | 134 | E | -8.598002  | 12.483528 | -11.014863 | -4.375816 |

|      |   |     |     |   |            |           |            |           |
|------|---|-----|-----|---|------------|-----------|------------|-----------|
| 1GLO | A | SER | 135 | E | -9.136944  | 13.072333 | -11.155964 | -4.059907 |
| 1GLO | A | VAL | 136 | E | -9.196292  | 12.967674 | -11.088625 | -3.953809 |
| 1GLO | A | GLY | 137 | E | -9.360991  | 12.089265 | -11.951662 | -4.056357 |
| 1GLO | A | VAL | 138 | E | -9.372365  | 11.618583 | -12.348688 | -4.164207 |
| 1GLO | A | ASP | 139 | C | -9.090159  | 9.012687  | -13.405120 | -4.378358 |
| 1GLO | A | ALA | 140 | C | -8.432450  | 8.368694  | -12.649212 | -4.266890 |
| 1GLO | A | ARG | 141 | C | -8.438995  | 8.330242  | -12.657128 | -4.272650 |
| 1GLO | A | HIS | 142 | C | -8.469143  | 8.250173  | -12.621527 | -4.271866 |
| 1GLO | A | PRO | 143 | H | -8.445247  | 8.433118  | -12.544601 | -4.261138 |
| 1GLO | A | SER | 144 | H | -8.590961  | 8.546274  | -12.295645 | -4.226193 |
| 1GLO | A | PHE | 145 | H | -9.885019  | 12.147565 | -12.214287 | -4.303172 |
| 1GLO | A | PHE | 146 | H | -9.864101  | 11.945172 | -12.238592 | -4.225671 |
| 1GLO | A | LEU | 147 | H | -9.608736  | 10.820583 | -12.786891 | -4.208635 |
| 1GLO | A | TYR | 148 | C | -9.850542  | 9.935012  | -13.632022 | -4.229515 |
| 1GLO | A | ARG | 149 | C | -9.753104  | 10.158353 | -13.649045 | -4.270848 |
| 1GLO | A | SER | 150 | C | -8.812638  | 14.151945 | -10.733609 | -4.872772 |
| 1GLO | A | GLY | 151 | C | -8.779574  | 14.465478 | -10.757410 | -4.978681 |
| 1GLO | A | VAL | 152 | C | -8.737305  | 15.122021 | -10.606851 | -5.122108 |
| 1GLO | A | TYR | 153 | B | -8.705149  | 15.088105 | -10.736554 | -5.189107 |
| 1GLO | A | TYR | 154 | C | -6.643356  | 9.296359  | -10.370530 | -5.130116 |
| 1GLO | A | GLU | 155 | T | -6.557556  | 8.718937  | -10.784367 | -5.111956 |
| 1GLO | A | PRO | 156 | T | -6.555652  | 8.685698  | -10.808260 | -5.108833 |
| 1GLO | A | SER | 157 | T | -6.556172  | 8.646876  | -10.823801 | -5.107198 |
| 1GLO | A | CYS | 158 | T | -6.545070  | 8.609388  | -10.879138 | -5.101286 |
| 1GLO | A | THR | 159 | C | -7.545406  | 6.330727  | -13.320911 | -4.985888 |
| 1GLO | A | GLN | 160 | C | -8.505394  | 7.002844  | -14.541215 | -4.952988 |
| 1GLO | A | ASN | 161 | C | -8.288298  | 8.105054  | -13.972137 | -5.160035 |
| 1GLO | A | VAL | 162 | C | -8.293212  | 8.472262  | -13.786384 | -5.169738 |
| 1GLO | A | ASN | 163 | C | -8.596494  | 9.220786  | -13.835635 | -5.373918 |
| 1GLO | A | HIS | 164 | E | -8.719991  | 9.772524  | -13.519768 | -5.405482 |
| 1GLO | A | GLY | 165 | E | -8.573165  | 11.029793 | -12.310213 | -4.957603 |
| 1GLO | A | VAL | 166 | E | -8.883061  | 14.530441 | -9.611970  | -3.855087 |
| 1GLO | A | LEU | 167 | E | -8.959429  | 14.943563 | -9.060747  | -3.656045 |
| 1GLO | A | VAL | 168 | E | -8.897073  | 14.925018 | -9.233684  | -3.726516 |
| 1GLO | A | VAL | 169 | E | -8.886532  | 14.818368 | -9.358259  | -3.768865 |
| 1GLO | A | GLY | 170 | E | -9.193353  | 14.726143 | -9.835228  | -3.907058 |
| 1GLO | A | TYR | 171 | E | -8.938473  | 11.286111 | -12.643868 | -5.073164 |
| 1GLO | A | GLY | 172 | E | -4.020458  | 4.393729  | -8.963276  | -4.745210 |
| 1GLO | A | ASP | 173 | E | -3.419541  | 5.004555  | -8.360963  | -4.733720 |
| 1GLO | A | LEU | 174 | E | -3.407835  | 5.019830  | -8.410560  | -4.740457 |
| 1GLO | A | ASN | 175 | T | -3.407640  | 5.021278  | -8.411992  | -4.740748 |
| 1GLO | A | GLY | 176 | T | -3.407681  | 5.020886  | -8.411686  | -4.740716 |
| 1GLO | A | LYS | 177 | E | -3.669199  | 5.357676  | -8.087803  | -4.727557 |
| 1GLO | A | GLU | 178 | E | -5.732307  | 5.817005  | -10.876350 | -5.057772 |
| 1GLO | A | TYR | 179 | E | -8.159359  | 9.420359  | -12.737366 | -5.592898 |
| 1GLO | A | TRP | 180 | E | -12.390895 | 15.704051 | -15.675837 | -6.014978 |
| 1GLO | A | LEU | 181 | E | -13.693851 | 18.501469 | -16.930877 | -6.092197 |
| 1GLO | A | VAL | 182 | E | -13.674783 | 17.631590 | -16.839383 | -5.743278 |
| 1GLO | A | LYS | 183 | E | -13.443804 | 15.640889 | -17.865844 | -6.033548 |
| 1GLO | A | ASN | 184 | C | -12.336616 | 12.463228 | -17.093246 | -5.700073 |
| 1GLO | A | SER | 185 | C | -9.513699  | 10.332055 | -13.454886 | -5.141776 |
| 1GLO | A | TRP | 186 | B | -8.744118  | 12.208990 | -11.674747 | -4.973609 |
| 1GLO | A | GLY | 187 | T | -7.548126  | 8.934839  | -11.523718 | -4.788972 |
| 1GLO | A | HIS | 188 | T | -7.545992  | 8.935919  | -11.539245 | -4.790537 |
| 1GLO | A | ASN | 189 | T | -7.544952  | 8.935082  | -11.548222 | -4.791545 |
| 1GLO | A | PHE | 190 | T | -7.563463  | 8.887102  | -11.499156 | -4.780974 |
| 1GLO | A | GLY | 191 | T | -7.622093  | 8.449638  | -11.576937 | -4.770891 |
| 1GLO | A | GLU | 192 | B | -9.887915  | 10.078185 | -15.476002 | -5.331850 |
| 1GLO | A | GLU | 193 | T | -10.005618 | 10.323679 | -15.382142 | -5.355073 |
| 1GLO | A | GLY | 194 | T | -10.086907 | 10.532065 | -15.189818 | -5.348510 |
| 1GLO | A | TYR | 195 | E | -10.354916 | 11.124486 | -15.036799 | -5.425640 |
| 1GLO | A | ILE | 196 | E | -10.825120 | 13.110251 | -13.977084 | -5.291095 |
| 1GLO | A | ARG | 197 | E | -12.715044 | 16.041094 | -14.956090 | -5.358306 |
| 1GLO | A | MET | 198 | E | -14.180304 | 15.817008 | -18.944180 | -6.352144 |
| 1GLO | A | ALA | 199 | E | -11.171316 | 9.321346  | -17.591777 | -6.234295 |
| 1GLO | A | ARG | 200 | T | -11.130484 | 9.249928  | -17.813063 | -6.279387 |
| 1GLO | A | ASN | 201 | T | -10.912482 | 8.593240  | -18.318818 | -6.323452 |
| 1GLO | A | LYS | 202 | T | -10.774455 | 8.442791  | -18.457674 | -6.311118 |
| 1GLO | A | GLY | 203 | T | -10.523274 | 7.811293  | -18.486279 | -6.192597 |
| 1GLO | A | ASN | 204 | T | -10.703377 | 7.440813  | -18.752584 | -6.117117 |
| 1GLO | A | HIS | 205 | G | -10.397816 | 9.298988  | -16.721111 | -5.573492 |
| 1GLO | A | CYS | 206 | G | -9.937748  | 9.990948  | -14.863758 | -5.028278 |
| 1GLO | A | GLY | 207 | G | -9.800975  | 10.718924 | -14.207096 | -4.854502 |
| 1GLO | A | ILE | 208 | T | -9.801883  | 11.537456 | -13.522510 | -4.657895 |
| 1GLO | A | ALA | 209 | T | -9.778292  | 11.600154 | -13.470329 | -4.621682 |
| 1GLO | A | SER | 210 | T | -9.873509  | 11.551213 | -13.370731 | -4.579025 |
| 1GLO | A | PHE | 211 | T | -10.330819 | 13.079924 | -12.762027 | -4.382239 |
| 1GLO | A | PRO | 212 | E | -10.876812 | 13.815114 | -12.599473 | -4.168786 |
| 1GLO | A | SER | 213 | E | -11.387901 | 13.112165 | -13.863875 | -4.550304 |
| 1GLO | A | TYR | 214 | E | -9.779522  | 17.248812 | -9.841490  | -4.906971 |
| 1GLO | A | PRO | 215 | E | -9.779522  | 17.248812 | -9.841490  | -4.906971 |

|      |   |     |     |   |            |           |            |           |
|------|---|-----|-----|---|------------|-----------|------------|-----------|
| 1GLO | A | GLU | 216 | E | -9.779522  | 17.248812 | -9.841490  | -4.906971 |
| 1GLO | A | ILE | 217 | C | -9.779522  | 17.248812 | -9.841490  | -4.906971 |
| 1GNU | A | MET | 1   | C | -9.245012  | 10.999576 | -11.646575 | -4.299133 |
| 1GNU | A | LYS | 2   | C | -9.245012  | 10.999576 | -11.646575 | -4.299133 |
| 1GNU | A | PHE | 3   | C | -9.245012  | 10.999576 | -11.646575 | -4.299133 |
| 1GNU | A | VAL | 4   | H | -9.245012  | 10.999576 | -11.646575 | -4.299133 |
| 1GNU | A | TYR | 5   | H | -10.079799 | 13.726929 | -13.845110 | -6.277129 |
| 1GNU | A | LYS | 6   | H | -7.343931  | 8.739601  | -11.874248 | -5.422097 |
| 1GNU | A | GLU | 7   | H | -7.087092  | 9.291718  | -11.582045 | -5.305589 |
| 1GNU | A | GLU | 8   | H | -7.038366  | 9.297012  | -11.674562 | -5.296601 |
| 1GNU | A | HIS | 9   | C | -6.988948  | 9.185798  | -11.794848 | -5.271427 |
| 1GNU | A | PRO | 10  | C | -6.988744  | 9.164094  | -11.800383 | -5.266226 |
| 1GNU | A | PHE | 11  | H | -7.453500  | 9.729180  | -11.736370 | -5.090663 |
| 1GNU | A | GLU | 12  | H | -8.080227  | 8.638692  | -13.040789 | -5.090311 |
| 1GNU | A | LYS | 13  | H | -8.443305  | 8.029877  | -13.283584 | -5.004590 |
| 1GNU | A | ARG | 14  | H | -10.033203 | 9.702746  | -14.729385 | -5.313017 |
| 1GNU | A | ARG | 15  | H | -11.827585 | 9.801433  | -17.618566 | -5.295801 |
| 1GNU | A | SER | 16  | H | -10.083859 | 7.535664  | -16.082421 | -5.376862 |
| 1GNU | A | GLU | 17  | H | -9.498047  | 9.296977  | -14.800784 | -5.378091 |
| 1GNU | A | GLY | 18  | H | -9.486639  | 9.367075  | -14.836806 | -5.392853 |
| 1GNU | A | GLU | 19  | H | -9.472646  | 9.416608  | -14.868723 | -5.393961 |
| 1GNU | A | LYS | 20  | H | -9.447217  | 9.515609  | -14.844505 | -5.375367 |
| 1GNU | A | ILE | 21  | H | -9.656390  | 10.652622 | -14.284084 | -5.370548 |
| 1GNU | A | ARG | 22  | H | -10.150905 | 10.954521 | -14.981532 | -5.221241 |
| 1GNU | A | LYS | 23  | H | -7.197402  | 7.563461  | -11.685248 | -4.945992 |
| 1GNU | A | LYS | 24  | H | -7.076825  | 7.978686  | -11.639309 | -4.923950 |
| 1GNU | A | TYR | 25  | T | -7.068316  | 8.039089  | -11.635877 | -4.916653 |
| 1GNU | A | PRO | 26  | T | -7.058078  | 8.113977  | -11.615012 | -4.897265 |
| 1GNU | A | ASP | 27  | T | -7.058089  | 8.129259  | -11.601303 | -4.892923 |
| 1GNU | A | ARG | 28  | E | -7.966252  | 10.323063 | -11.357126 | -4.696846 |
| 1GNU | A | VAL | 29  | E | -8.873788  | 13.746433 | -10.219864 | -3.892881 |
| 1GNU | A | PRO | 30  | E | -9.094187  | 14.532472 | -9.582687  | -3.636653 |
| 1GNU | A | VAL | 31  | E | -9.560777  | 17.067453 | -8.460988  | -3.413662 |
| 1GNU | A | ILE | 32  | E | -9.690683  | 17.625303 | -8.045981  | -3.360325 |
| 1GNU | A | VAL | 33  | E | -9.688556  | 17.095217 | -8.590521  | -3.550020 |
| 1GNU | A | GLU | 34  | E | -9.467087  | 9.874442  | -14.159781 | -5.143539 |
| 1GNU | A | LYS | 35  | E | -6.915207  | 7.651206  | -10.404315 | -4.238344 |
| 1GNU | A | ALA | 36  | T | -5.504041  | 5.395397  | -8.796492  | -3.350268 |
| 1GNU | A | PRO | 37  | T | -5.034898  | 6.643388  | -7.899177  | -3.328298 |
| 1GNU | A | LYS | 38  | T | -4.645125  | 7.193542  | -7.578821  | -3.520784 |
| 1GNU | A | ALA | 39  | T | -4.607991  | 7.299536  | -7.653578  | -3.564542 |
| 1GNU | A | ARG | 40  | C | -4.581214  | 7.497737  | -7.625883  | -3.600125 |
| 1GNU | A | ILE | 41  | C | -4.696124  | 8.090484  | -7.434680  | -3.703344 |
| 1GNU | A | GLY | 42  | C | -4.910265  | 8.268343  | -7.600669  | -3.890045 |
| 1GNU | A | ASP | 43  | C | -5.739345  | 9.753555  | -8.743079  | -4.393611 |
| 1GNU | A | LEU | 44  | T | -6.052889  | 10.326554 | -8.690437  | -4.500451 |
| 1GNU | A | ASP | 45  | T | -6.897267  | 9.716721  | -10.773883 | -5.057122 |
| 1GNU | A | LYS | 46  | T | -7.714159  | 7.795713  | -13.004043 | -5.358943 |
| 1GNU | A | LYS | 47  | T | -9.111107  | 9.915445  | -14.277513 | -5.701632 |
| 1GNU | A | LYS | 48  | E | -10.127606 | 12.020922 | -14.886737 | -5.812395 |
| 1GNU | A | TYR | 49  | E | -10.831300 | 15.493100 | -13.937432 | -5.445811 |
| 1GNU | A | LEU | 50  | E | -9.153587  | 11.553379 | -11.414563 | -4.269578 |
| 1GNU | A | VAL | 51  | E | -8.230525  | 10.888060 | -10.630943 | -4.155947 |
| 1GNU | A | PRO | 52  | E | -7.957698  | 10.660199 | -10.965765 | -4.331714 |
| 1GNU | A | SER | 53  | T | -7.934287  | 10.695164 | -11.019431 | -4.341776 |
| 1GNU | A | ASP | 54  | T | -7.821976  | 10.752534 | -11.129406 | -4.406824 |
| 1GNU | A | LEU | 55  | T | -7.838642  | 10.666003 | -11.198184 | -4.425876 |
| 1GNU | A | THR | 56  | B | -8.131504  | 10.727534 | -11.724679 | -4.630483 |
| 1GNU | A | VAL | 57  | H | -8.538104  | 11.155625 | -11.902093 | -4.625166 |
| 1GNU | A | GLY | 58  | H | -8.607981  | 11.086896 | -11.846309 | -4.629047 |
| 1GNU | A | GLN | 59  | H | -9.235965  | 11.156572 | -12.197771 | -4.461464 |
| 1GNU | A | PHE | 60  | H | -10.134534 | 14.163980 | -11.939208 | -4.751154 |
| 1GNU | A | TYR | 61  | H | -11.778661 | 17.791932 | -13.697094 | -5.379885 |
| 1GNU | A | PHE | 62  | H | -11.126008 | 13.329738 | -14.068719 | -4.711114 |
| 1GNU | A | LEU | 63  | H | -11.207360 | 12.738234 | -14.108452 | -4.540806 |
| 1GNU | A | ILE | 64  | H | -11.224943 | 12.582358 | -14.122638 | -4.518578 |
| 1GNU | A | ARG | 65  | H | -11.054949 | 11.788521 | -14.733806 | -4.643317 |
| 1GNU | A | LYS | 66  | H | -8.188293  | 11.844260 | -9.934462  | -4.333767 |
| 1GNU | A | ARG | 67  | H | -8.094228  | 11.812356 | -10.083033 | -4.300030 |
| 1GNU | A | ILE | 68  | H | -7.074953  | 9.660786  | -9.393877  | -3.847211 |
| 1GNU | A | HIS | 69  | C | -5.977743  | 6.660476  | -9.638324  | -3.924193 |
| 1GNU | A | LEU | 70  | C | -5.645302  | 6.398158  | -9.845463  | -4.039754 |
| 1GNU | A | ARG | 71  | T | -4.704142  | 5.178919  | -8.931276  | -3.946074 |
| 1GNU | A | ALA | 72  | T | -4.694896  | 5.246122  | -8.951710  | -3.958892 |
| 1GNU | A | GLU | 73  | T | -4.703491  | 5.189941  | -8.948353  | -3.962473 |
| 1GNU | A | ASP | 74  | T | -4.764728  | 5.090333  | -8.867668  | -3.964811 |
| 1GNU | A | ALA | 75  | C | -4.825312  | 4.986749  | -8.732254  | -3.939992 |
| 1GNU | A | LEU | 76  | C | -7.131959  | 9.664242  | -10.305155 | -4.760073 |
| 1GNU | A | PHE | 77  | E | -9.338945  | 13.085122 | -11.776074 | -5.127418 |
| 1GNU | A | PHE | 78  | E | -12.206443 | 19.433879 | -12.484474 | -5.138838 |
| 1GNU | A | PHE | 79  | E | -10.337633 | 11.832156 | -13.001152 | -4.519571 |

|      |   |     |      |   |            |           |            |           |
|------|---|-----|------|---|------------|-----------|------------|-----------|
| 1GNU | A | VAL | 80   | B | -7.339308  | 9.193091  | -9.979749  | -4.150670 |
| 1GNU | A | ASN | 81   | T | -7.203118  | 9.316877  | -10.095396 | -4.131041 |
| 1GNU | A | ASN | 82   | T | -6.925508  | 9.407878  | -9.730286  | -3.889208 |
| 1GNU | A | VAL | 83   | B | -5.942268  | 9.892478  | -7.175465  | -3.279542 |
| 1GNU | A | ILE | 84   | C | -5.619111  | 10.037704 | -6.906895  | -3.219656 |
| 1GNU | A | PRO | 85   | C | -5.438071  | 9.884793  | -6.838320  | -3.181180 |
| 1GNU | A | PRO | 86   | T | -5.329628  | 9.489200  | -7.191240  | -3.278224 |
| 1GNU | A | THR | 87   | T | -5.343876  | 9.489851  | -7.148595  | -3.274915 |
| 1GNU | A | SER | 88   | T | -5.550679  | 9.273511  | -7.391281  | -3.333464 |
| 1GNU | A | ALA | 89   | T | -5.828734  | 8.694647  | -7.903847  | -3.451232 |
| 1GNU | A | THR | 90   | B | -6.351708  | 7.670726  | -9.070540  | -3.786996 |
| 1GNU | A | MET | 91   | H | -8.943923  | 10.851913 | -12.578372 | -4.706064 |
| 1GNU | A | GLY | 92   | H | -9.625771  | 10.374210 | -14.238271 | -5.006003 |
| 1GNU | A | GLN | 93   | H | -9.991909  | 10.858248 | -14.504998 | -5.136949 |
| 1GNU | A | LEU | 94   | H | -10.430277 | 12.940803 | -14.034000 | -5.315950 |
| 1GNU | A | TYR | 95   | H | -10.973534 | 13.556011 | -15.076742 | -5.520692 |
| 1GNU | A | GLN | 96   | H | -10.665014 | 11.841663 | -15.733854 | -5.560480 |
| 1GNU | A | GLU | 97   | H | -10.135238 | 10.375858 | -15.519943 | -5.523551 |
| 1GNU | A | HIS | 98   | H | -10.161830 | 10.169411 | -15.580014 | -5.527774 |
| 1GNU | A | HIS | 99   | C | -10.125790 | 10.109010 | -15.669760 | -5.539636 |
| 1GNU | A | GLU | 100  | T | -10.194435 | 9.778555  | -15.751992 | -5.542034 |
| 1GNU | A | GLU | 101  | T | -10.313956 | 9.894411  | -15.532903 | -5.523303 |
| 1GNU | A | ASP | 102  | T | -11.507841 | 11.464966 | -16.472867 | -5.660007 |
| 1GNU | A | PHE | 103  | T | -11.556250 | 11.553325 | -16.279774 | -5.642512 |
| 1GNU | A | PHE | 104  | C | -13.067640 | 19.485551 | -14.537311 | -5.490008 |
| 1GNU | A | LEU | 105  | E | -13.333752 | 21.625406 | -13.217438 | -5.152704 |
| 1GNU | A | TYR | 106  | E | -13.762984 | 23.678186 | -12.275434 | -4.874538 |
| 1GNU | A | ILE | 107  | E | -13.560141 | 21.937143 | -13.180692 | -4.910399 |
| 1GNU | A | ALA | 108  | E | -12.466332 | 15.963361 | -14.769854 | -5.172876 |
| 1GNU | A | TYR | 109  | E | -11.808352 | 15.646762 | -14.713021 | -5.494647 |
| 1GNU | A | SER | 110  | E | -9.615898  | 15.727669 | -13.655526 | -7.343045 |
| 1GNU | A | ASP | 111  | C | -7.466888  | 13.278772 | -11.127182 | -6.531472 |
| 1GNU | A | GLU | 112  | C | -5.610431  | 11.024941 | -8.456852  | -5.361950 |
| 1GNU | A | SER | 113  | C | -4.836847  | 10.263930 | -7.316012  | -4.671159 |
| 1GNU | A | VAL | 114  | C | -3.967637  | 8.571632  | -6.061574  | -3.839916 |
| 1GNU | A | TYR | 115  | C | -3.967637  | 8.571632  | -6.061574  | -3.839916 |
| 1GNU | A | GLY | 116  | C | -3.967637  | 8.571632  | -6.061574  | -3.839916 |
| 1GNU | A | LEU | 117  | C | -3.967637  | 8.571632  | -6.061574  | -3.839916 |
| 1GPO | A | ASP | 1515 | C | -8.232721  | 6.764177  | -13.008861 | -4.349732 |
| 1GPO | A | CYS | 1516 | C | -8.232721  | 6.764177  | -13.008861 | -4.349732 |
| 1GPO | A | GLN | 1517 | E | -8.232721  | 6.764177  | -13.008861 | -4.349732 |
| 1GPO | A | VAL | 1518 | E | -8.232721  | 6.764177  | -13.008861 | -4.349732 |
| 1GPO | A | THR | 1519 | E | -5.958181  | 5.737613  | -10.053874 | -4.265383 |
| 1GPO | A | ASN | 1520 | T | -4.675063  | 3.488235  | -10.051409 | -4.439953 |
| 1GPO | A | PRO | 1521 | T | -4.576875  | 3.583430  | -10.140548 | -4.422807 |
| 1GPO | A | SER | 1522 | T | -4.544319  | 3.747620  | -10.166351 | -4.440079 |
| 1GPO | A | THR | 1523 | T | -4.543792  | 3.754605  | -10.167571 | -4.440628 |
| 1GPO | A | GLY | 1524 | T | -4.600463  | 3.557907  | -10.180785 | -4.458432 |
| 1GPO | A | HIS | 1525 | C | -5.501172  | 4.830822  | -10.630127 | -4.440599 |
| 1GPO | A | LEU | 1526 | E | -6.268828  | 6.745492  | -10.635292 | -4.748324 |
| 1GPO | A | PHE | 1527 | E | -8.623989  | 11.684459 | -11.737859 | -5.079384 |
| 1GPO | A | ASP | 1528 | E | -9.356211  | 11.862386 | -12.529919 | -4.799894 |
| 1GPO | A | LEU | 1529 | C | -9.422884  | 11.936997 | -12.037052 | -4.403022 |
| 1GPO | A | SER | 1530 | G | -8.902857  | 9.133318  | -12.895126 | -4.348919 |
| 1GPO | A | SER | 1531 | G | -8.886369  | 9.083850  | -12.966563 | -4.348010 |
| 1GPO | A | LEU | 1532 | G | -8.868893  | 9.049356  | -13.035418 | -4.350817 |
| 1GPO | A | SER | 1533 | B | -8.096888  | 5.598341  | -13.798783 | -4.576151 |
| 1GPO | A | GLY | 1534 | T | -8.065510  | 5.553589  | -13.883856 | -4.591541 |
| 1GPO | A | ARG | 1535 | T | -8.144319  | 5.391946  | -13.941261 | -4.638232 |
| 1GPO | A | ALA | 1536 | T | -8.057401  | 6.120402  | -13.632371 | -4.609497 |
| 1GPO | A | GLY | 1537 | T | -8.044145  | 6.264980  | -13.594067 | -4.608562 |
| 1GPO | A | PHE | 1538 | E | -8.810198  | 9.899222  | -12.747138 | -4.527276 |
| 1GPO | A | THR | 1539 | E | -8.808250  | 12.021186 | -12.577674 | -5.141487 |
| 1GPO | A | ALA | 1540 | E | -7.662083  | 9.789833  | -10.416857 | -4.182242 |
| 1GPO | A | ALA | 1541 | E | -4.968619  | 6.655455  | -7.787752  | -3.849014 |
| 1GPO | A | TYR | 1542 | E | -3.611570  | 5.888580  | -7.096209  | -4.170717 |
| 1GPO | A | SER | 1543 | T | -3.042893  | 4.873840  | -7.084929  | -4.032485 |
| 1GPO | A | GLU | 1544 | T | -3.015728  | 4.974250  | -7.098586  | -4.023912 |
| 1GPO | A | LYS | 1545 | T | -3.015885  | 4.973273  | -7.097781  | -4.023928 |
| 1GPO | A | GLY | 1546 | E | -3.038290  | 4.907392  | -7.068942  | -4.028960 |
| 1GPO | A | LEU | 1547 | E | -3.288121  | 4.421586  | -7.068520  | -3.920560 |
| 1GPO | A | VAL | 1548 | E | -4.861211  | 7.069602  | -7.314387  | -3.796204 |
| 1GPO | A | TYR | 1549 | E | -8.623164  | 12.282064 | -10.269391 | -4.419535 |
| 1GPO | A | MET | 1550 | E | -10.940733 | 12.134866 | -15.053160 | -5.478022 |
| 1GPO | A | SER | 1551 | T | -10.238639 | 10.217185 | -15.229756 | -5.475195 |
| 1GPO | A | ILE | 1552 | B | -9.952811  | 10.120216 | -15.482335 | -5.662170 |
| 1GPO | A | CYS | 1553 | T | -9.876305  | 9.844213  | -15.828521 | -5.752785 |
| 1GPO | A | GLY | 1554 | T | -9.866779  | 9.790570  | -15.902451 | -5.764989 |
| 1GPO | A | GLU | 1555 | C | -9.948596  | 9.523495  | -16.070187 | -5.819390 |
| 1GPO | A | ASN | 1556 | T | -10.226473 | 9.226744  | -16.866564 | -6.065593 |
| 1GPO | A | GLU | 1557 | T | -8.933186  | 6.896430  | -14.370495 | -4.970085 |

|      |   |     |      |   |            |           |            |           |
|------|---|-----|------|---|------------|-----------|------------|-----------|
| 1GPO | A | ASN | 1558 | T | -8.110077  | 5.818395  | -13.963833 | -4.824792 |
| 1GPO | A | CYS | 1559 | T | -5.708848  | 5.920551  | -9.454719  | -4.090346 |
| 1GPO | A | PRO | 1560 | T | -4.787319  | 6.364769  | -8.167283  | -3.934016 |
| 1GPO | A | PRO | 1561 | T | -4.743402  | 6.466586  | -8.226251  | -3.934578 |
| 1GPO | A | GLY | 1562 | T | -4.742583  | 6.470069  | -8.230405  | -3.935262 |
| 1GPO | A | VAL | 1563 | E | -4.744105  | 6.472691  | -8.215894  | -3.933056 |
| 1GPO | A | GLY | 1564 | E | -4.871017  | 6.604330  | -7.938577  | -3.898217 |
| 1GPO | A | ALA | 1565 | E | -6.286698  | 7.814457  | -9.104117  | -3.963059 |
| 1GPO | A | CYS | 1566 | E | -7.744098  | 9.444291  | -11.729075 | -4.788317 |
| 1GPO | A | PHE | 1567 | E | -7.749154  | 10.240031 | -11.288675 | -4.763650 |
| 1GPO | A | GLY | 1568 | T | -5.926674  | 5.736279  | -9.947315  | -4.062481 |
| 1GPO | A | GLN | 1569 | T | -5.914299  | 5.763895  | -9.987424  | -4.063699 |
| 1GPO | A | THR | 1570 | T | -5.913767  | 5.765365  | -9.989187  | -4.062972 |
| 1GPO | A | ARG | 1571 | T | -5.930124  | 5.647285  | -9.953103  | -4.039556 |
| 1GPO | A | ILE | 1572 | C | -5.937329  | 5.587480  | -9.943538  | -4.033103 |
| 1GPO | A | SER | 1573 | E | -8.018539  | 7.992396  | -12.023226 | -4.186939 |
| 1GPO | A | VAL | 1574 | E | -8.828804  | 10.104058 | -12.429849 | -4.300232 |
| 1GPO | A | GLY | 1575 | E | -8.962836  | 9.965861  | -12.794522 | -4.453052 |
| 1GPO | A | LYS | 1576 | E | -8.973402  | 9.892052  | -12.828555 | -4.464497 |
| 1GPO | A | ALA | 1577 | C | -9.515969  | 9.177811  | -14.299086 | -4.594680 |
| 1GPO | A | ASN | 1578 | C | -9.852670  | 8.108299  | -15.596059 | -4.872645 |
| 1GPO | A | LYS | 1579 | T | -10.024204 | 7.917785  | -15.787466 | -4.941464 |
| 1GPO | A | ARG | 1580 | T | -10.551919 | 9.211520  | -15.617983 | -4.847631 |
| 1GPO | A | LEU | 1581 | T | -10.117364 | 12.137230 | -12.935134 | -4.488965 |
| 1GPO | A | ARG | 1582 | E | -8.807408  | 9.209978  | -12.116787 | -4.254529 |
| 1GPO | A | TYR | 1583 | E | -5.703834  | 9.086530  | -7.740413  | -4.064932 |
| 1GPO | A | VAL | 1584 | E | -5.435910  | 8.964267  | -7.764323  | -3.931950 |
| 1GPO | A | ASP | 1585 | T | -5.435566  | 8.965725  | -7.766901  | -3.932238 |
| 1GPO | A | GLN | 1586 | T | -5.435708  | 8.964714  | -7.765928  | -3.932148 |
| 1GPO | A | VAL | 1587 | E | -5.437556  | 8.964974  | -7.752341  | -3.931158 |
| 1GPO | A | LEU | 1588 | E | -6.034152  | 8.753802  | -7.812350  | -3.700025 |
| 1GPO | A | GLN | 1589 | E | -9.839299  | 11.545511 | -12.238816 | -4.428454 |
| 1GPO | A | LEU | 1590 | E | -12.103104 | 15.210498 | -14.620376 | -4.848134 |
| 1GPO | A | VAL | 1591 | E | -9.947464  | 12.154726 | -13.448474 | -5.483943 |
| 1GPO | A | TYR | 1592 | E | -9.616534  | 12.277852 | -13.606734 | -5.615729 |
| 1GPO | A | LYS | 1593 | E | -6.162546  | 6.541326  | -10.897063 | -5.022687 |
| 1GPO | A | ASP | 1594 | E | -5.996518  | 6.548268  | -11.128190 | -5.051826 |
| 1GPO | A | GLY | 1595 | E | -5.835884  | 6.149457  | -11.222250 | -4.882314 |
| 1GPO | A | SER | 1596 | E | -5.799681  | 6.122064  | -11.285539 | -4.860201 |
| 1GPO | A | PRO | 1597 | E | -5.779647  | 6.135137  | -11.334474 | -4.861108 |
| 1GPO | A | CYS | 1598 | T | -6.171911  | 5.725183  | -11.889525 | -4.684518 |
| 1GPO | A | PRO | 1599 | T | -5.215623  | 4.842251  | -10.152979 | -4.422470 |
| 1GPO | A | SER | 1600 | T | -5.166861  | 4.937056  | -10.170902 | -4.449190 |
| 1GPO | A | LYS | 1601 | T | -5.005076  | 5.158666  | -10.068772 | -4.422514 |
| 1GPO | A | SER | 1602 | T | -4.998696  | 5.259252  | -10.026674 | -4.416312 |
| 1GPO | A | GLY | 1603 | T | -5.004493  | 5.256724  | -9.999301  | -4.414094 |
| 1GPO | A | LEU | 1604 | T | -5.557399  | 6.006680  | -10.179119 | -4.409412 |
| 1GPO | A | SER | 1605 | E | -5.769685  | 6.240583  | -9.849830  | -4.347947 |
| 1GPO | A | TYR | 1606 | E | -7.307853  | 10.989377 | -9.240963  | -4.350473 |
| 1GPO | A | LYS | 1607 | E | -9.485667  | 13.837630 | -11.544790 | -5.171630 |
| 1GPO | A | SER | 1608 | E | -12.421806 | 16.133036 | -14.855414 | -5.039429 |
| 1GPO | A | VAL | 1609 | E | -12.168429 | 16.938535 | -13.704829 | -4.705386 |
| 1GPO | A | ILE | 1610 | E | -11.421490 | 16.213016 | -12.585923 | -4.543313 |
| 1GPO | A | SER | 1611 | E | -11.352337 | 16.052537 | -12.839003 | -4.593902 |
| 1GPO | A | PHE | 1612 | E | -9.562220  | 15.533375 | -13.063339 | -6.519454 |
| 1GPO | A | VAL | 1613 | E | -6.571245  | 8.190630  | -11.309163 | -5.242402 |
| 1GPO | A | CYS | 1614 | E | -5.634960  | 7.108578  | -9.378118  | -4.194540 |
| 1GPO | A | ARG | 1615 | T | -4.496812  | 6.752926  | -7.491111  | -3.857252 |
| 1GPO | A | PRO | 1616 | T | -3.222876  | 4.894147  | -6.703084  | -3.813547 |
| 1GPO | A | GLU | 1617 | T | -2.554316  | 5.361509  | -6.191083  | -4.036749 |
| 1GPO | A | ALA | 1618 | T | -2.326354  | 5.386156  | -6.357785  | -4.156327 |
| 1GPO | A | GLY | 1619 | T | -2.319791  | 5.390433  | -6.386687  | -4.162211 |
| 1GPO | A | PRO | 1620 | T | -2.333002  | 5.357726  | -6.364661  | -4.166993 |
| 1GPO | A | THR | 1621 | T | -2.467211  | 5.496982  | -6.258395  | -4.226423 |
| 1GPO | A | ASN | 1622 | T | -2.990306  | 5.335022  | -6.662125  | -4.312339 |
| 1GPO | A | ARG | 1623 | C | -4.848299  | 5.966905  | -8.800542  | -4.396952 |
| 1GPO | A | PRO | 1624 | C | -6.812812  | 9.689431  | -9.742725  | -4.313327 |
| 1GPO | A | MET | 1625 | E | -7.132918  | 11.381486 | -9.260014  | -4.270297 |
| 1GPO | A | LEU | 1626 | E | -7.079962  | 11.543648 | -8.820698  | -4.036535 |
| 1GPO | A | ILE | 1627 | E | -6.585951  | 10.031138 | -9.409462  | -4.253286 |
| 1GPO | A | SER | 1628 | E | -6.574886  | 9.958735  | -9.497477  | -4.269600 |
| 1GPO | A | LEU | 1629 | E | -6.522049  | 9.652841  | -9.841055  | -4.399667 |
| 1GPO | A | ASP | 1630 | E | -6.686826  | 8.968745  | -10.446122 | -4.560982 |
| 1GPO | A | LYS | 1631 | T | -6.743497  | 8.627655  | -10.591749 | -4.599667 |
| 1GPO | A | GLN | 1632 | T | -7.535721  | 7.942885  | -12.647602 | -5.101054 |
| 1GPO | A | THR | 1633 | T | -7.613837  | 7.942806  | -12.555775 | -5.124591 |
| 1GPO | A | CYS | 1634 | T | -8.695510  | 7.570977  | -14.874124 | -5.571721 |
| 1GPO | A | THR | 1635 | E | -9.490723  | 10.059196 | -14.704178 | -5.690286 |
| 1GPO | A | LEU | 1636 | E | -10.404929 | 13.160700 | -13.815617 | -5.308938 |
| 1GPO | A | PHE | 1637 | E | -10.900031 | 14.862687 | -12.879984 | -5.145894 |
| 1GPO | A | PHE | 1638 | E | -12.886669 | 19.381680 | -13.633278 | -5.393115 |

|      |   |     |      |   |            |           |            |           |
|------|---|-----|------|---|------------|-----------|------------|-----------|
| 1GPO | A | SER | 1639 | E | -13.075591 | 17.529586 | -14.784750 | -5.230327 |
| 1GPO | A | TRP | 1640 | E | -13.134937 | 17.277156 | -14.787123 | -5.222454 |
| 1GPO | A | HIS | 1641 | E | -12.088920 | 16.819090 | -15.626749 | -6.668113 |
| 1GPO | A | THR | 1642 | E | -10.096380 | 13.420443 | -13.359094 | -5.716065 |
| 1GPO | A | PRO | 1643 | G | -8.726631  | 10.769453 | -11.931877 | -4.789719 |
| 1GPO | A | LEU | 1644 | G | -8.027353  | 9.358844  | -11.387657 | -4.293066 |
| 1GPO | A | ALA | 1645 | G | -8.027353  | 9.358844  | -11.387657 | -4.293066 |
| 1GPO | A | CYS | 1646 | C | -8.027353  | 9.358844  | -11.387657 | -4.293066 |
| 1GPO | A | GLU | 1647 | C | -8.027353  | 9.358844  | -11.387657 | -4.293066 |
| 1GQV | A | MET | 0    | C | -7.627094  | 7.939531  | -11.120989 | -4.092088 |
| 1GQV | A | LYS | 1    | C | -7.627094  | 7.939531  | -11.120989 | -4.092088 |
| 1GQV | A | PRO | 2    | T | -7.627094  | 7.939531  | -11.120989 | -4.092088 |
| 1GQV | A | PRO | 3    | T | -7.627094  | 7.939531  | -11.120989 | -4.092088 |
| 1GQV | A | GLN | 4    | T | -9.169941  | 9.259297  | -13.768118 | -5.176534 |
| 1GQV | A | PHE | 5    | T | -10.964551 | 14.328657 | -15.100362 | -6.255950 |
| 1GQV | A | THR | 6    | C | -11.910438 | 16.105866 | -15.004208 | -5.831143 |
| 1GQV | A | TRP | 7    | H | -11.980609 | 16.127794 | -14.572499 | -5.602934 |
| 1GQV | A | ALA | 8    | H | -11.985578 | 16.112709 | -14.520784 | -5.575889 |
| 1GQV | A | GLN | 9    | H | -13.155545 | 16.504773 | -16.195610 | -5.680090 |
| 1GQV | A | TRP | 10   | H | -13.545407 | 17.482498 | -16.075767 | -5.810681 |
| 1GQV | A | PHE | 11   | H | -14.835418 | 20.061818 | -17.459846 | -6.109351 |
| 1GQV | A | GLU | 12   | H | -14.864860 | 19.653918 | -17.738359 | -6.158463 |
| 1GQV | A | THR | 13   | H | -14.355030 | 16.238623 | -18.481307 | -6.006666 |
| 1GQV | A | GLN | 14   | H | -14.069983 | 15.495964 | -18.644480 | -6.058893 |
| 1GQV | A | HIS | 15   | H | -10.664984 | 13.663293 | -13.428904 | -5.335565 |
| 1GQV | A | ILE | 16   | H | -8.542105  | 11.856872 | -11.305345 | -5.009784 |
| 1GQV | A | ASN | 17   | T | -7.539314  | 9.412340  | -11.648245 | -5.058048 |
| 1GQV | A | MET | 18   | T | -7.474417  | 9.341630  | -11.857210 | -5.089377 |
| 1GQV | A | THR | 19   | T | -7.445763  | 9.183520  | -12.036058 | -5.101377 |
| 1GQV | A | SER | 20   | T | -7.448054  | 9.162706  | -12.033630 | -5.100676 |
| 1GQV | A | GLN | 21   | T | -7.543787  | 8.674689  | -12.205348 | -5.123567 |
| 1GQV | A | GLN | 22   | C | -8.565200  | 7.815489  | -14.435037 | -5.377916 |
| 1GQV | A | CYS | 23   | H | -9.191339  | 6.109935  | -15.903127 | -5.415190 |
| 1GQV | A | THR | 24   | H | -10.529373 | 7.272880  | -18.179678 | -6.048315 |
| 1GQV | A | ASN | 25   | H | -10.535291 | 7.681479  | -17.951922 | -6.042251 |
| 1GQV | A | ALA | 26   | H | -11.331751 | 10.996257 | -17.480014 | -5.833906 |
| 1GQV | A | MET | 27   | H | -11.501600 | 12.162507 | -16.915607 | -5.752199 |
| 1GQV | A | GLN | 28   | H | -11.619188 | 12.230259 | -16.764928 | -5.628316 |
| 1GQV | A | VAL | 29   | H | -11.589070 | 12.632129 | -16.426744 | -5.553479 |
| 1GQV | A | ILE | 30   | H | -11.976986 | 13.539854 | -16.290384 | -5.495400 |
| 1GQV | A | ASN | 31   | H | -12.166022 | 12.990701 | -16.987084 | -5.699155 |
| 1GQV | A | ASN | 32   | H | -11.538851 | 13.016446 | -15.802614 | -5.572048 |
| 1GQV | A | TYR | 33   | H | -11.279063 | 13.373224 | -15.526182 | -5.602667 |
| 1GQV | A | GLN | 34   | H | -11.329705 | 13.198874 | -15.628248 | -5.624436 |
| 1GQV | A | ARG | 35   | C | -10.928382 | 10.959759 | -16.355060 | -5.548545 |
| 1GQV | A | ARG | 36   | C | -10.002261 | 9.131112  | -16.159596 | -5.835935 |
| 1GQV | A | CYS | 37   | C | -9.994172  | 8.822110  | -16.411404 | -5.896439 |
| 1GQV | A | LYS | 38   | C | -9.956901  | 8.653289  | -16.613057 | -5.953586 |
| 1GQV | A | ASN | 39   | C | -9.958630  | 8.656056  | -16.604691 | -5.954245 |
| 1GQV | A | GLN | 40   | E | -10.018197 | 8.658017  | -16.551705 | -6.005479 |
| 1GQV | A | ASN | 41   | E | -11.014863 | 8.683265  | -18.458236 | -6.410101 |
| 1GQV | A | THR | 42   | E | -11.149885 | 11.398448 | -16.707998 | -6.096820 |
| 1GQV | A | PHE | 43   | E | -10.921094 | 17.045703 | -11.777935 | -4.890581 |
| 1GQV | A | LEU | 44   | E | -10.417582 | 17.691254 | -11.008663 | -4.852405 |
| 1GQV | A | LEU | 45   | C | -9.707249  | 15.124433 | -11.227355 | -4.676440 |
| 1GQV | A | THR | 46   | C | -9.021563  | 12.748769 | -11.631432 | -4.691457 |
| 1GQV | A | THR | 47   | C | -8.890028  | 12.556890 | -11.693729 | -4.615741 |
| 1GQV | A | PHE | 48   | H | -8.903597  | 12.447222 | -11.706412 | -4.608853 |
| 1GQV | A | ALA | 49   | H | -8.718296  | 10.829618 | -12.212120 | -4.420892 |
| 1GQV | A | ASN | 50   | H | -8.746738  | 10.236906 | -12.443979 | -4.356133 |
| 1GQV | A | VAL | 51   | H | -9.050013  | 9.192762  | -12.962858 | -4.086778 |
| 1GQV | A | VAL | 52   | H | -8.380269  | 7.120770  | -13.055686 | -4.233366 |
| 1GQV | A | ASN | 53   | H | -7.848314  | 6.335610  | -13.418756 | -4.586039 |
| 1GQV | A | VAL | 54   | H | -7.684783  | 5.808858  | -13.622736 | -4.585824 |
| 1GQV | A | CYS | 55   | H | -6.902819  | 4.511975  | -13.560931 | -4.959291 |
| 1GQV | A | GLY | 56   | H | -6.749562  | 4.578917  | -13.595533 | -4.969516 |
| 1GQV | A | ASN | 57   | C | -6.736184  | 4.674006  | -13.600678 | -5.004200 |
| 1GQV | A | PRO | 58   | C | -6.627600  | 5.458160  | -13.174440 | -5.044371 |
| 1GQV | A | ASN | 59   | E | -6.629409  | 5.715952  | -13.087364 | -5.083122 |
| 1GQV | A | MET | 60   | E | -6.970787  | 7.247638  | -12.725600 | -5.087272 |
| 1GQV | A | THR | 61   | C | -7.138712  | 8.366792  | -12.388777 | -5.146523 |
| 1GQV | A | CYS | 62   | T | -6.741796  | 7.705473  | -12.233413 | -5.236683 |
| 1GQV | A | PRO | 63   | T | -4.656884  | 6.417781  | -8.783533  | -4.717920 |
| 1GQV | A | SER | 64   | T | -4.523251  | 6.073227  | -9.147777  | -4.713587 |
| 1GQV | A | ASN | 65   | T | -4.375719  | 5.963052  | -9.309385  | -4.707394 |
| 1GQV | A | LYS | 66   | T | -4.375383  | 5.961252  | -9.312273  | -4.707346 |
| 1GQV | A | THR | 67   | T | -4.381504  | 5.949666  | -9.282138  | -4.701229 |
| 1GQV | A | ARG | 68   | T | -4.947681  | 5.232983  | -10.195677 | -4.690570 |
| 1GQV | A | LYS | 69   | C | -5.266188  | 5.580693  | -9.911824  | -4.685314 |
| 1GQV | A | ASN | 70   | C | -8.163991  | 6.000894  | -13.939706 | -5.049558 |
| 1GQV | A | CYS | 71   | E | -10.478674 | 6.262663  | -17.434299 | -5.459153 |

|      |   |     |     |   |            |           |            |           |
|------|---|-----|-----|---|------------|-----------|------------|-----------|
| 1GQV | A | HIS | 72  | E | -10.905936 | 8.294594  | -16.678059 | -5.183528 |
| 1GQV | A | HIS | 73  | E | -8.434303  | 8.367825  | -12.992052 | -5.022682 |
| 1GQV | A | SER | 74  | T | -7.479082  | 8.348309  | -11.668491 | -4.688833 |
| 1GQV | A | GLY | 75  | T | -7.226462  | 8.087723  | -11.600832 | -4.505955 |
| 1GQV | A | SER | 76  | T | -7.225064  | 8.096998  | -11.602767 | -4.504632 |
| 1GQV | A | GLN | 77  | C | -7.225668  | 8.101579  | -11.595277 | -4.503561 |
| 1GQV | A | VAL | 78  | E | -7.306827  | 8.062474  | -11.398724 | -4.427698 |
| 1GQV | A | PRO | 79  | E | -7.847549  | 7.644192  | -11.488761 | -4.162409 |
| 1GQV | A | LEU | 80  | E | -10.588402 | 12.384943 | -13.064925 | -4.214257 |
| 1GQV | A | ILE | 81  | E | -11.437877 | 14.691220 | -13.257539 | -4.521740 |
| 1GQV | A | HIS | 82  | E | -11.587341 | 10.909395 | -16.862432 | -5.555875 |
| 1GQV | A | CYS | 83  | E | -9.671248  | 9.877360  | -14.218647 | -5.296045 |
| 1GQV | A | ASN | 84  | E | -7.230940  | 8.510229  | -10.837938 | -4.614105 |
| 1GQV | A | LEU | 85  | E | -6.243787  | 8.733545  | -9.527273  | -4.428824 |
| 1GQV | A | THR | 86  | E | -5.788807  | 7.798193  | -9.618782  | -4.320761 |
| 1GQV | A | THR | 87  | E | -5.484485  | 6.825963  | -9.811150  | -4.197858 |
| 1GQV | A | PRO | 88  | T | -5.158098  | 5.627567  | -10.154659 | -4.206321 |
| 1GQV | A | SER | 89  | T | -5.150360  | 5.537815  | -10.206555 | -4.202705 |
| 1GQV | A | PRO | 90  | T | -5.226635  | 5.065945  | -10.372642 | -4.177058 |
| 1GQV | A | GLN | 91  | T | -5.361634  | 4.568421  | -10.567686 | -4.167800 |
| 1GQV | A | ASN | 92  | T | -5.594601  | 4.181430  | -10.804978 | -4.244548 |
| 1GQV | A | ILE | 93  | G | -6.878434  | 5.579609  | -12.212136 | -4.450288 |
| 1GQV | A | SER | 94  | G | -7.781511  | 5.899349  | -13.643310 | -4.647651 |
| 1GQV | A | ASN | 95  | G | -8.357968  | 6.179484  | -14.773850 | -5.150121 |
| 1GQV | A | CYS | 96  | C | -9.188961  | 7.135017  | -15.711112 | -5.573418 |
| 1GQV | A | ARG | 97  | E | -10.447010 | 9.918364  | -16.284515 | -5.677486 |
| 1GQV | A | TYR | 98  | E | -9.691147  | 11.408449 | -13.083080 | -4.973279 |
| 1GQV | A | ALA | 99  | E | -7.621445  | 6.443096  | -11.906429 | -4.175277 |
| 1GQV | A | GLN | 100 | E | -6.928679  | 6.763879  | -11.586298 | -4.441360 |
| 1GQV | A | THR | 101 | E | -6.584957  | 7.133579  | -11.119340 | -4.340374 |
| 1GQV | A | PRO | 102 | E | -6.578531  | 7.180336  | -11.126622 | -4.343353 |
| 1GQV | A | ALA | 103 | E | -6.581459  | 7.159892  | -11.117847 | -4.340433 |
| 1GQV | A | ASN | 104 | E | -6.690200  | 7.335196  | -10.965894 | -4.378572 |
| 1GQV | A | MET | 105 | E | -7.056445  | 7.699329  | -10.557565 | -4.222068 |
| 1GQV | A | PHE | 106 | C | -9.254541  | 11.509293 | -11.836810 | -4.626740 |
| 1GQV | A | TYR | 107 | E | -12.384356 | 17.477859 | -14.529934 | -5.353600 |
| 1GQV | A | ILE | 108 | E | -11.785998 | 12.770091 | -14.818513 | -4.576081 |
| 1GQV | A | VAL | 109 | E | -10.181151 | 9.053883  | -14.311894 | -4.473928 |
| 1GQV | A | ALA | 110 | E | -10.160713 | 9.035332  | -14.431616 | -4.498745 |
| 1GQV | A | CYS | 111 | E | -10.142437 | 8.965186  | -14.582497 | -4.535416 |
| 1GQV | A | ASP | 112 | E | -10.033566 | 8.505652  | -15.105765 | -4.658289 |
| 1GQV | A | ASN | 113 | E | -8.202318  | 5.917260  | -13.363633 | -4.466472 |
| 1GQV | A | ARG | 114 | C | -8.211381  | 5.815256  | -13.387644 | -4.465812 |
| 1GQV | A | ASP | 115 | T | -8.196312  | 5.808104  | -13.468184 | -4.476262 |
| 1GQV | A | GLN | 116 | T | -8.186521  | 5.796862  | -13.516405 | -4.474454 |
| 1GQV | A | ARG | 117 | T | -8.134573  | 5.743266  | -13.599524 | -4.429812 |
| 1GQV | A | ARG | 118 | T | -9.137427  | 5.603525  | -15.501921 | -4.377253 |
| 1GQV | A | ASP | 119 | T | -7.396148  | 9.231306  | -10.750904 | -4.578783 |
| 1GQV | A | PRO | 120 | T | -5.650492  | 8.424113  | -8.108208  | -3.963169 |
| 1GQV | A | PRO | 121 | T | -5.408615  | 8.693696  | -8.094777  | -3.970694 |
| 1GQV | A | GLN | 122 | T | -5.395891  | 8.770193  | -8.100386  | -3.970143 |
| 1GQV | A | TYR | 123 | T | -5.395800  | 8.774304  | -8.098401  | -3.969759 |
| 1GQV | A | PRO | 124 | T | -5.414286  | 8.761748  | -8.018263  | -3.947357 |
| 1GQV | A | VAL | 125 | E | -6.012568  | 9.437578  | -8.112978  | -3.977389 |
| 1GQV | A | VAL | 126 | E | -7.573143  | 12.283932 | -8.668114  | -3.869526 |
| 1GQV | A | PRO | 127 | E | -8.796041  | 14.179582 | -9.033705  | -3.330175 |
| 1GQV | A | VAL | 128 | E | -8.899490  | 14.010038 | -8.914130  | -3.240374 |
| 1GQV | A | HIS | 129 | E | -9.534623  | 14.898434 | -9.659181  | -3.559585 |
| 1GQV | A | LEU | 130 | E | -9.728931  | 15.760676 | -10.289855 | -4.184438 |
| 1GQV | A | ASP | 131 | E | -8.365172  | 11.211061 | -10.025271 | -3.884611 |
| 1GQV | A | ARG | 132 | E | -8.365172  | 11.211061 | -10.025271 | -3.884611 |
| 1GQV | A | ILE | 133 | E | -8.365172  | 11.211061 | -10.025271 | -3.884611 |
| 1GQV | A | ILE | 134 | C | -8.365172  | 11.211061 | -10.025271 | -3.884611 |
| 1GSM | A | VAL | 1   | C | -5.739952  | 6.235785  | -5.167111  | -1.381939 |
| 1GSM | A | LYS | 2   | T | -5.739952  | 6.235785  | -5.167111  | -1.381939 |
| 1GSM | A | PRO | 3   | T | -5.739952  | 6.235785  | -5.167111  | -1.381939 |
| 1GSM | A | LEU | 4   | E | -5.739952  | 6.235785  | -5.167111  | -1.381939 |
| 1GSM | A | GLN | 5   | E | -6.859402  | 6.824061  | -7.291328  | -2.205021 |
| 1GSM | A | VAL | 6   | E | -8.019292  | 9.259200  | -8.493183  | -2.627740 |
| 1GSM | A | GLU | 7   | E | -8.253649  | 7.392608  | -9.166647  | -2.152602 |
| 1GSM | A | PRO | 8   | T | -7.264755  | 7.999449  | -8.960446  | -2.951137 |
| 1GSM | A | PRO | 9   | T | -6.990734  | 7.862831  | -8.106264  | -2.410503 |
| 1GSM | A | GLU | 10  | T | -6.953300  | 7.978081  | -8.019709  | -2.356148 |
| 1GSM | A | PRO | 11  | T | -6.966513  | 8.152120  | -7.891358  | -2.330519 |
| 1GSM | A | VAL | 12  | E | -6.981393  | 8.339531  | -7.773080  | -2.332904 |
| 1GSM | A | VAL | 13  | E | -7.385120  | 8.667269  | -6.627773  | -1.540563 |
| 1GSM | A | ALA | 14  | E | -7.882666  | 11.270033 | -6.550701  | -1.755979 |
| 1GSM | A | VAL | 15  | E | -7.660376  | 9.978467  | -6.800444  | -1.767349 |
| 1GSM | A | ALA | 16  | E | -7.207495  | 7.783568  | -7.450434  | -1.939293 |
| 1GSM | A | LEU | 17  | T | -7.216536  | 7.667753  | -7.494986  | -1.948884 |
| 1GSM | A | GLY | 18  | T | -7.220206  | 7.555762  | -7.544527  | -1.953100 |

|      |   |     |    |   |            |           |            |           |
|------|---|-----|----|---|------------|-----------|------------|-----------|
| 1GSM | A | ALA | 19 | b | -7.292626  | 7.089571  | -7.677430  | -1.957812 |
| 1GSM | A | SER | 20 | C | -7.488115  | 6.666453  | -7.885062  | -2.060122 |
| 1GSM | A | ARG | 21 | E | -9.612685  | 9.204115  | -12.527509 | -3.763431 |
| 1GSM | A | GLN | 22 | E | -9.844524  | 9.196272  | -13.491906 | -4.415070 |
| 1GSM | A | LEU | 23 | E | -11.563427 | 12.670562 | -12.014356 | -3.008334 |
| 1GSM | A | THR | 24 | E | -11.839109 | 12.863008 | -12.714421 | -3.326194 |
| 1GSM | A | CYS | 25 | E | -11.423699 | 9.471125  | -13.547303 | -3.237338 |
| 1GSM | A | ARG | 26 | E | -9.196913  | 7.619069  | -10.256986 | -2.593100 |
| 1GSM | A | LEU | 27 | E | -6.955496  | 5.927226  | -8.129206  | -2.448907 |
| 1GSM | A | ALA | 28 | C | -4.615768  | 3.007973  | -8.553302  | -3.416115 |
| 1GSM | A | CYS | 29 | C | -3.239978  | 1.475945  | -5.586971  | -2.243137 |
| 1GSM | A | ALA | 30 | C | -3.091577  | 1.671955  | -5.461825  | -2.123253 |
| 1GSM | A | ASP | 31 | T | -3.091027  | 1.674271  | -5.465198  | -2.123480 |
| 1GSM | A | ARG | 32 | T | -3.091856  | 1.668414  | -5.461532  | -2.122980 |
| 1GSM | A | GLY | 33 | T | -3.138468  | 1.562203  | -5.203560  | -2.013944 |
| 1GSM | A | ALA | 34 | T | -3.986748  | 2.357692  | -4.994071  | -1.686228 |
| 1GSM | A | SER | 35 | E | -7.181614  | 4.423107  | -9.102884  | -2.341883 |
| 1GSM | A | VAL | 36 | E | -8.922309  | 7.196236  | -9.531155  | -2.138222 |
| 1GSM | A | GLN | 37 | E | -12.804098 | 10.911635 | -17.413766 | -5.257579 |
| 1GSM | A | TRP | 38 | E | -12.087696 | 14.169529 | -15.817060 | -6.377699 |
| 1GSM | A | ARG | 39 | E | -9.066378  | 7.444790  | -12.533786 | -4.085996 |
| 1GSM | A | GLY | 40 | T | -6.917665  | 5.395121  | -9.363917  | -3.064340 |
| 1GSM | A | LEU | 41 | T | -6.193970  | 4.200771  | -8.125791  | -2.182875 |
| 1GSM | A | ASP | 42 | T | -4.295864  | 1.837992  | -6.419037  | -2.060077 |
| 1GSM | A | THR | 43 | T | -3.159190  | 3.963882  | -6.140591  | -3.216690 |
| 1GSM | A | SER | 44 | T | -3.118913  | 3.874101  | -6.123729  | -3.113838 |
| 1GSM | A | LEU | 45 | T | -3.108135  | 3.879111  | -6.137923  | -3.103539 |
| 1GSM | A | GLY | 46 | T | -3.110076  | 3.879769  | -6.134508  | -3.108308 |
| 1GSM | A | ALA | 47 | C | -3.192690  | 4.197227  | -6.097373  | -3.262308 |
| 1GSM | A | VAL | 48 | E | -4.570268  | 2.974458  | -6.182374  | -1.859434 |
| 1GSM | A | GLN | 49 | E | -5.395085  | 4.237376  | -7.318365  | -2.598208 |
| 1GSM | A | SER | 50 | E | -6.835461  | 4.598132  | -10.521436 | -3.100008 |
| 1GSM | A | ASP | 51 | E | -7.037499  | 4.974969  | -10.706632 | -3.228732 |
| 1GSM | A | THR | 52 | C | -7.350982  | 5.207153  | -11.241754 | -3.321588 |
| 1GSM | A | GLY | 53 | C | -7.415509  | 5.304292  | -10.886102 | -3.174999 |
| 1GSM | A | ARG | 54 | E | -7.695122  | 6.097189  | -10.461401 | -2.989872 |
| 1GSM | A | SER | 55 | E | -8.030743  | 7.058498  | -10.391412 | -3.069364 |
| 1GSM | A | VAL | 56 | E | -7.527875  | 9.670332  | -7.303270  | -2.430152 |
| 1GSM | A | LEU | 57 | E | -7.303466  | 9.735339  | -6.916811  | -2.320118 |
| 1GSM | A | THR | 58 | E | -6.538605  | 9.162360  | -8.010732  | -3.312568 |
| 1GSM | A | VAL | 59 | E | -6.530976  | 9.139293  | -8.017396  | -3.291417 |
| 1GSM | A | ARG | 60 | T | -6.525225  | 9.130062  | -8.021927  | -3.277774 |
| 1GSM | A | ASN | 61 | T | -6.608376  | 8.914005  | -8.303688  | -3.438973 |
| 1GSM | A | ALA | 62 | b | -6.702220  | 8.919868  | -8.461866  | -3.619629 |
| 1GSM | A | SER | 63 | C | -8.400035  | 8.385923  | -9.586279  | -2.347464 |
| 1GSM | A | LEU | 64 | G | -8.293401  | 7.716390  | -9.803467  | -2.405616 |
| 1GSM | A | SER | 65 | G | -8.347977  | 7.054995  | -10.315284 | -2.482479 |
| 1GSM | A | ALA | 66 | G | -8.367970  | 7.044616  | -10.303330 | -2.502006 |
| 1GSM | A | ALA | 67 | C | -8.387706  | 7.006485  | -10.300632 | -2.524698 |
| 1GSM | A | GLY | 68 | E | -8.564438  | 6.434752  | -9.973098  | -2.233979 |
| 1GSM | A | THR | 69 | E | -9.383154  | 5.640555  | -11.165431 | -2.328887 |
| 1GSM | A | ARG | 70 | E | -11.433944 | 10.460830 | -13.421797 | -3.310368 |
| 1GSM | A | VAL | 71 | E | -11.198862 | 8.577023  | -13.949629 | -3.330897 |
| 1GSM | A | CYS | 72 | E | -10.687079 | 7.833446  | -14.558000 | -3.859300 |
| 1GSM | A | VAL | 73 | E | -9.361535  | 7.371934  | -14.527434 | -4.853184 |
| 1GSM | A | GLY | 74 | E | -7.320548  | 3.707645  | -12.219558 | -4.123122 |
| 1GSM | A | SER | 75 | E | -5.990250  | 2.986128  | -9.051511  | -2.847184 |
| 1GSM | A | CYS | 76 | E | -3.711042  | 3.610657  | -5.301341  | -2.623728 |
| 1GSM | A | GLY | 77 | T | -3.669134  | 3.777354  | -5.338427  | -2.613422 |
| 1GSM | A | GLY | 78 | T | -3.667445  | 3.789660  | -5.350457  | -2.617187 |
| 1GSM | A | ARG | 79 | E | -3.668656  | 3.790048  | -5.336522  | -2.614134 |
| 1GSM | A | THR | 80 | E | -3.679297  | 3.806275  | -5.275620  | -2.612476 |
| 1GSM | A | PHE | 81 | E | -5.236471  | 6.125063  | -5.983132  | -2.524074 |
| 1GSM | A | GLN | 82 | E | -7.122035  | 8.132970  | -9.638467  | -3.935426 |
| 1GSM | A | HIS | 83 | E | -9.641847  | 12.471341 | -9.000742  | -3.098212 |
| 1GSM | A | THR | 84 | E | -9.651008  | 12.520747 | -8.935646  | -3.100360 |
| 1GSM | A | VAL | 85 | E | -11.388532 | 13.505354 | -11.257369 | -2.900437 |
| 1GSM | A | GLN | 86 | E | -11.905629 | 13.491324 | -11.945691 | -2.817594 |
| 1GSM | A | LEU | 87 | E | -12.002685 | 16.086785 | -10.425756 | -2.592700 |
| 1GSM | A | LEU | 88 | E | -11.927426 | 17.286191 | -9.911991  | -2.676738 |
| 1GSM | A | VAL | 89 | E | -11.708439 | 19.045498 | -8.340681  | -2.496616 |
| 1GSM | A | TYR | 90 | E | -11.757555 | 19.508191 | -8.377546  | -2.667597 |
| 1GSM | A | ALA | 91 | B | -10.515118 | 12.827430 | -9.828144  | -2.844917 |
| 1GSM | A | PHE | 92 | C | -10.381025 | 12.963806 | -10.015285 | -2.964049 |
| 1GSM | A | PRO | 93 | C | -10.089245 | 12.200572 | -11.611424 | -3.773705 |
| 1GSM | A | ASN | 94 | C | -9.997166  | 11.593710 | -11.884458 | -3.761438 |
| 1GSM | A | GLN | 95 | E | -9.924828  | 11.363197 | -11.834581 | -3.627951 |
| 1GSM | A | LEU | 96 | E | -9.948512  | 10.881937 | -11.857682 | -3.409639 |
| 1GSM | A | THR | 97 | E | -8.261436  | 6.947806  | -8.480543  | -1.729228 |
| 1GSM | A | VAL | 98 | E | -6.363536  | 9.123679  | -7.355894  | -3.118095 |
| 1GSM | A | SER | 99 | E | -6.345446  | 9.118235  | -7.341567  | -3.066308 |



|      |   |     |     |   |            |           |            |           |
|------|---|-----|-----|---|------------|-----------|------------|-----------|
| 1GSM | A | PRO | 100 | T | -6.343070  | 9.124476  | -7.343163  | -3.060393 |
| 1GSM | A | ALA | 101 | T | -6.340807  | 9.140821  | -7.343420  | -3.057561 |
| 1GSM | A | ALA | 102 | T | -6.317855  | 9.463246  | -7.361092  | -3.162900 |
| 1GSM | A | LEU | 103 | B | -6.105955  | 11.175345 | -7.601359  | -4.217452 |
| 1GSM | A | VAL | 104 | T | -5.476948  | 7.825614  | -6.294716  | -2.709751 |
| 1GSM | A | PRO | 105 | T | -5.464760  | 7.803154  | -6.347863  | -2.712623 |
| 1GSM | A | GLY | 106 | T | -5.463397  | 7.797976  | -6.358552  | -2.713771 |
| 1GSM | A | ASP | 107 | T | -5.473796  | 7.717114  | -6.328837  | -2.694515 |
| 1GSM | A | PRO | 108 | C | -5.699942  | 6.119387  | -5.743194  | -1.940476 |
| 1GSM | A | GLU | 109 | E | -7.655771  | 7.039718  | -9.037684  | -2.817655 |
| 1GSM | A | VAL | 110 | E | -8.794569  | 8.019817  | -10.136797 | -2.926290 |
| 1GSM | A | ALA | 111 | E | -10.234357 | 10.186950 | -11.662295 | -2.983110 |
| 1GSM | A | CYS | 112 | E | -10.258213 | 10.183336 | -11.664337 | -3.010416 |
| 1GSM | A | THR | 113 | E | -10.343947 | 10.398901 | -11.211364 | -2.816538 |
| 1GSM | A | ALA | 114 | E | -10.407938 | 10.570929 | -11.001371 | -2.754595 |
| 1GSM | A | HIS | 115 | E | -11.122118 | 12.275191 | -12.908705 | -3.676472 |
| 1GSM | A | LYS | 116 | E | -10.009940 | 13.536306 | -8.210224  | -2.381291 |
| 1GSM | A | VAL | 117 | E | -8.490437  | 12.455224 | -6.242419  | -2.007843 |
| 1GSM | A | THR | 118 | B | -7.662021  | 10.803964 | -8.006326  | -3.002047 |
| 1GSM | A | PRO | 119 | T | -6.273314  | 6.938789  | -5.984364  | -1.736913 |
| 1GSM | A | VAL | 120 | T | -5.768012  | 6.223019  | -5.884697  | -1.650892 |
| 1GSM | A | ASP | 121 | T | -5.742201  | 6.286854  | -5.941328  | -1.665512 |
| 1GSM | A | PRO | 122 | T | -5.745986  | 6.238031  | -5.948632  | -1.663945 |
| 1GSM | A | ASN | 123 | T | -5.763794  | 6.115494  | -5.868324  | -1.613190 |
| 1GSM | A | ALA | 124 | T | -6.049522  | 5.859121  | -5.929014  | -1.619627 |
| 1GSM | A | LEU | 125 | E | -7.567165  | 7.864159  | -7.343773  | -2.009798 |
| 1GSM | A | SER | 126 | E | -9.254248  | 8.750650  | -9.371884  | -2.219378 |
| 1GSM | A | PHE | 127 | E | -11.224278 | 14.374129 | -12.026989 | -4.112297 |
| 1GSM | A | SER | 128 | E | -11.017495 | 14.996435 | -13.417348 | -5.533483 |
| 1GSM | A | LEU | 129 | E | -8.152685  | 11.645584 | -8.605392  | -3.733393 |
| 1GSM | A | LEU | 130 | E | -5.475685  | 5.717926  | -6.310540  | -2.532333 |
| 1GSM | A | VAL | 131 | E | -4.272495  | 4.134249  | -5.971570  | -2.618832 |
| 1GSM | A | GLY | 132 | T | -4.261574  | 4.172493  | -6.014507  | -2.626550 |
| 1GSM | A | GLY | 133 | T | -4.192137  | 4.538895  | -6.288042  | -2.815722 |
| 1GSM | A | GLN | 134 | E | -4.178116  | 4.572675  | -6.311659  | -2.810173 |
| 1GSM | A | GLU | 135 | E | -4.066912  | 5.392601  | -5.726590  | -2.727228 |
| 1GSM | A | LEU | 136 | T | -4.573843  | 7.810393  | -5.431963  | -2.838270 |
| 1GSM | A | GLU | 137 | T | -4.439945  | 7.359529  | -5.487063  | -2.725420 |
| 1GSM | A | GLY | 138 | T | -4.415748  | 7.444947  | -5.468903  | -2.744334 |
| 1GSM | A | ALA | 139 | T | -4.371221  | 7.417729  | -5.458706  | -2.722605 |
| 1GSM | A | GLN | 140 | E | -4.575208  | 6.847222  | -6.339272  | -2.852596 |
| 1GSM | A | ALA | 141 | E | -4.625908  | 6.709746  | -6.434323  | -2.889477 |
| 1GSM | A | LEU | 142 | C | -4.816548  | 7.216727  | -6.641919  | -3.099275 |
| 1GSM | A | GLY | 143 | C | -5.112583  | 6.780415  | -5.912083  | -2.445657 |
| 1GSM | A | PRO | 144 | C | -5.385386  | 6.771102  | -5.891361  | -2.413138 |
| 1GSM | A | GLU | 145 | E | -6.397482  | 7.499814  | -7.351551  | -2.640371 |
| 1GSM | A | VAL | 146 | E | -6.558119  | 7.731278  | -7.108424  | -2.637405 |
| 1GSM | A | GLN | 147 | E | -8.005225  | 7.140365  | -11.825447 | -3.964212 |
| 1GSM | A | GLU | 148 | E | -7.618875  | 6.890430  | -14.478584 | -6.676734 |
| 1GSM | A | GLU | 149 | T | -7.605139  | 6.445758  | -15.864119 | -7.526140 |
| 1GSM | A | GLU | 150 | T | -6.430418  | 4.419879  | -12.888459 | -5.564425 |
| 1GSM | A | GLU | 151 | T | -3.750460  | 1.688864  | -6.234571  | -2.456658 |
| 1GSM | A | GLU | 152 | T | -2.708764  | 1.530675  | -5.102004  | -2.340636 |
| 1GSM | A | PRO | 153 | C | -0.335607  | 1.273714  | -4.245804  | -3.649985 |
| 1GSM | A | GLN | 154 | C | -0.317551  | 1.307815  | -4.375695  | -3.702238 |
| 1GSM | A | GLY | 155 | C | -0.315537  | 1.318359  | -4.392347  | -3.708303 |
| 1GSM | A | ASP | 156 | C | -0.319832  | 1.311007  | -4.357251  | -3.698990 |
| 1GSM | A | GLU | 157 | C | -0.341467  | 1.269840  | -4.224492  | -3.651948 |
| 1GSM | A | ASP | 158 | C | -2.859749  | 1.748591  | -5.584545  | -2.767785 |
| 1GSM | A | VAL | 159 | C | -4.167419  | 3.892174  | -6.494814  | -3.090564 |
| 1GSM | A | LEU | 160 | C | -5.651060  | 8.727384  | -10.030680 | -6.290153 |
| 1GSM | A | PHE | 161 | E | -8.446288  | 13.035813 | -11.728911 | -6.731313 |
| 1GSM | A | ARG | 162 | E | -12.282612 | 16.200131 | -15.192385 | -6.322945 |
| 1GSM | A | VAL | 163 | E | -13.045454 | 16.522166 | -12.469704 | -3.471747 |
| 1GSM | A | THR | 164 | E | -13.805631 | 16.983979 | -14.662056 | -4.287524 |
| 1GSM | A | GLU | 165 | E | -14.011603 | 17.127936 | -15.303663 | -4.702747 |
| 1GSM | A | ARG | 166 | E | -14.146549 | 17.547621 | -15.485712 | -4.973887 |
| 1GSM | A | TRP | 167 | E | -12.327683 | 18.135680 | -10.891882 | -3.747468 |
| 1GSM | A | ARG | 168 | E | -9.085693  | 16.982990 | -8.745543  | -4.804147 |
| 1GSM | A | LEU | 169 | C | -5.651647  | 13.292705 | -4.029641  | -3.339176 |
| 1GSM | A | PRO | 170 | C | -3.891564  | 8.733861  | -2.005764  | -1.788556 |
| 1GSM | A | PRO | 171 | C | -2.901648  | 5.937563  | -1.991476  | -1.543302 |
| 1GSM | A | LEU | 172 | C | -2.626750  | 6.667256  | -1.715128  | -1.594693 |
| 1GSM | A | GLY | 173 | T | -1.986403  | 6.432669  | -2.620457  | -2.463048 |
| 1GSM | A | THR | 174 | T | -1.930072  | 6.360711  | -2.547873  | -2.330864 |
| 1GSM | A | PRO | 175 | T | -1.948962  | 6.286982  | -2.574044  | -2.350127 |
| 1GSM | A | VAL | 176 | T | -2.060834  | 6.422681  | -2.664754  | -2.500342 |
| 1GSM | A | PRO | 177 | C | -2.155888  | 6.125556  | -2.890771  | -2.623325 |
| 1GSM | A | PRO | 178 | C | -3.341908  | 5.689895  | -1.824755  | -0.994182 |
| 1GSM | A | ALA | 179 | E | -4.990703  | 10.335829 | -3.779568  | -2.512602 |
| 1GSM | A | LEU | 180 | E | -6.805315  | 15.559128 | -5.081014  | -4.115754 |

|      |   |     |     |   |            |           |            |           |
|------|---|-----|-----|---|------------|-----------|------------|-----------|
| 1GSM | A | TYR | 181 | E | -10.368209 | 17.099660 | -9.520242  | -3.949607 |
| 1GSM | A | CYS | 182 | E | -11.153455 | 14.724849 | -12.569477 | -4.631939 |
| 1GSM | A | GLN | 183 | E | -13.673090 | 12.892558 | -16.792033 | -4.569550 |
| 1GSM | A | ALA | 184 | E | -13.211403 | 14.479743 | -15.302635 | -4.464083 |
| 1GSM | A | THR | 185 | E | -12.654881 | 15.469217 | -14.652567 | -4.881263 |
| 1GSM | A | MET | 186 | E | -10.464602 | 10.780062 | -10.644395 | -2.915217 |
| 1GSM | A | ARG | 187 | E | -7.683492  | 9.234535  | -7.205985  | -2.390702 |
| 1GSM | A | LEU | 188 | E | -4.874224  | 10.636438 | -5.759042  | -4.132314 |
| 1GSM | A | PRO | 189 | T | -4.810651  | 10.326658 | -5.780794  | -3.952042 |
| 1GSM | A | GLY | 190 | T | -4.771157  | 10.114209 | -5.860632  | -3.875966 |
| 1GSM | A | LEU | 191 | E | -4.771158  | 10.114180 | -5.860650  | -3.875977 |
| 1GSM | A | GLU | 192 | E | -4.775077  | 10.121819 | -5.853061  | -3.886501 |
| 1GSM | A | LEU | 193 | E | -5.855713  | 7.380098  | -6.404813  | -2.528332 |
| 1GSM | A | SER | 194 | E | -6.387703  | 7.084047  | -7.046900  | -2.776970 |
| 1GSM | A | HIS | 195 | E | -8.888112  | 11.449707 | -9.340111  | -3.240856 |
| 1GSM | A | ARG | 196 | E | -8.865572  | 11.548011 | -9.199431  | -3.161872 |
| 1GSM | A | GLN | 197 | E | -9.507398  | 11.127362 | -9.908682  | -2.756817 |
| 1GSM | A | ALA | 198 | E | -8.502161  | 14.246826 | -9.276573  | -4.380413 |
| 1GSM | A | ILE | 199 | E | -7.732979  | 13.734800 | -7.000813  | -3.465867 |
| 1GSM | A | PRO | 200 | E | -5.825793  | 8.879658  | -4.763445  | -2.217273 |
| 1GSM | A | VAL | 201 | B | -4.003876  | 7.251334  | -2.683187  | -1.735411 |
| 1GSM | A | LEU | 202 | T | -2.561860  | 4.410927  | -1.837693  | -1.242096 |
| 1GSM | A | ILE | 203 | T | -1.075917  | 3.446271  | -2.421829  | -2.224559 |
| 1GSM | A | GLU | 204 | T | -1.075917  | 3.446271  | -2.421829  | -2.224559 |
| 1GSM | A | GLY | 205 | T | -1.075917  | 3.446271  | -2.421829  | -2.224559 |
| 1GSM | A | ARG | 206 | C | -1.075917  | 3.446271  | -2.421829  | -2.224559 |
| 1H6H | A | ALA | 2   | H | -3.590481  | 1.175666  | -7.419517  | -2.619603 |
| 1H6H | A | VAL | 3   | H | -3.590481  | 1.175666  | -7.419517  | -2.619603 |
| 1H6H | A | ALA | 4   | H | -3.590481  | 1.175666  | -7.419517  | -2.619603 |
| 1H6H | A | GLN | 5   | H | -3.590481  | 1.175666  | -7.419517  | -2.619603 |
| 1H6H | A | GLN | 6   | H | -4.826309  | 2.139190  | -10.337613 | -3.810091 |
| 1H6H | A | LEU | 7   | H | -5.457767  | 2.089841  | -11.365937 | -4.236269 |
| 1H6H | A | ARG | 8   | H | -7.095047  | 2.877884  | -14.513517 | -5.048517 |
| 1H6H | A | ALA | 9   | H | -7.785750  | 3.352870  | -16.188073 | -5.746836 |
| 1H6H | A | GLU | 10  | H | -8.176413  | 3.832524  | -16.707805 | -6.080351 |
| 1H6H | A | SER | 11  | H | -9.222986  | 5.219461  | -18.286037 | -6.337657 |
| 1H6H | A | ASP | 12  | H | -9.435105  | 7.294049  | -16.503961 | -5.603629 |
| 1H6H | A | PHE | 13  | H | -9.503756  | 9.164363  | -14.530431 | -4.892449 |
| 1H6H | A | GLU | 14  | H | -8.797261  | 8.465574  | -12.858771 | -4.326901 |
| 1H6H | A | GLN | 15  | H | -8.727184  | 8.570377  | -12.853200 | -4.321402 |
| 1H6H | A | LEU | 16  | C | -8.699073  | 8.918612  | -12.630407 | -4.285397 |
| 1H6H | A | PRO | 17  | T | -8.307420  | 10.016442 | -11.431847 | -4.208735 |
| 1H6H | A | ASP | 18  | T | -7.501365  | 11.231689 | -9.371840  | -4.080554 |
| 1H6H | A | ASP | 19  | T | -7.525522  | 11.472280 | -9.198738  | -4.066439 |
| 1H6H | A | VAL | 20  | T | -7.497311  | 11.520016 | -9.155478  | -4.014676 |
| 1H6H | A | ALA | 21  | E | -7.408253  | 11.259708 | -9.274659  | -3.951139 |
| 1H6H | A | ILE | 22  | E | -7.397144  | 11.252650 | -9.247027  | -3.927163 |
| 1H6H | A | SER | 23  | E | -7.852522  | 10.391290 | -10.364103 | -3.786606 |
| 1H6H | A | ALA | 24  | E | -7.212383  | 9.580840  | -9.663112  | -3.850976 |
| 1H6H | A | ASN | 25  | E | -6.602476  | 10.355708 | -8.438656  | -3.898940 |
| 1H6H | A | ILE | 26  | E | -6.464079  | 10.643751 | -8.325582  | -3.924372 |
| 1H6H | A | ALA | 27  | E | -6.330687  | 10.959884 | -8.640101  | -4.248380 |
| 1H6H | A | ASP | 28  | E | -6.327098  | 11.011121 | -8.667706  | -4.280680 |
| 1H6H | A | ILE | 29  | E | -6.256536  | 11.248791 | -8.546975  | -4.345862 |
| 1H6H | A | GLU | 30  | E | -5.383303  | 8.238863  | -8.532994  | -4.537176 |
| 1H6H | A | GLU | 31  | E | -4.015746  | 6.650563  | -7.241205  | -4.372357 |
| 1H6H | A | LYS | 32  | E | -2.992779  | 5.397288  | -6.427540  | -4.073641 |
| 1H6H | A | ARG | 33  | T | -2.771150  | 4.943804  | -6.678127  | -4.021145 |
| 1H6H | A | GLY | 34  | T | -2.771243  | 4.940178  | -6.680013  | -4.021539 |
| 1H6H | A | PHE | 35  | T | -2.777553  | 4.909854  | -6.659704  | -4.015347 |
| 1H6H | A | THR | 36  | T | -2.849058  | 4.696826  | -6.589382  | -3.963995 |
| 1H6H | A | SER | 37  | T | -3.467533  | 3.880943  | -7.159019  | -3.856121 |
| 1H6H | A | HIS | 38  | E | -7.226094  | 6.202836  | -12.593892 | -5.168594 |
| 1H6H | A | PHE | 39  | E | -10.196904 | 15.621722 | -16.022401 | -8.185731 |
| 1H6H | A | VAL | 40  | E | -10.627257 | 17.078203 | -15.919560 | -8.713137 |
| 1H6H | A | PHE | 41  | E | -11.916405 | 20.373811 | -10.569812 | -4.247964 |
| 1H6H | A | VAL | 42  | E | -10.573813 | 16.628438 | -10.822988 | -4.553110 |
| 1H6H | A | ILE | 43  | E | -10.318038 | 16.325010 | -11.275200 | -4.745189 |
| 1H6H | A | GLU | 44  | E | -10.312138 | 16.282490 | -11.353477 | -4.769964 |
| 1H6H | A | VAL | 45  | E | -10.240683 | 15.797194 | -11.752610 | -4.853943 |
| 1H6H | A | LYS | 46  | E | -8.615013  | 9.986583  | -13.012161 | -5.645966 |
| 1H6H | A | THR | 47  | E | -7.026792  | 8.245643  | -11.351350 | -5.183317 |
| 1H6H | A | LYS | 48  | T | -6.066045  | 7.655864  | -10.821397 | -5.325856 |
| 1H6H | A | GLY | 49  | T | -5.839159  | 7.808514  | -10.636875 | -5.234367 |
| 1H6H | A | GLY | 50  | T | -5.837914  | 7.817356  | -10.639146 | -5.233689 |
| 1H6H | A | SER | 51  | C | -5.843013  | 7.802354  | -10.617856 | -5.229620 |
| 1H6H | A | LYS | 52  | E | -5.923231  | 7.753782  | -10.529222 | -5.241397 |
| 1H6H | A | TYR | 53  | E | -6.513536  | 8.164126  | -10.251895 | -5.037141 |
| 1H6H | A | LEU | 54  | E | -9.449407  | 12.223218 | -11.818567 | -4.924860 |
| 1H6H | A | ILE | 55  | E | -11.464081 | 16.804150 | -12.102554 | -4.911011 |
| 1H6H | A | TYR | 56  | E | -13.169756 | 21.526064 | -12.788316 | -5.722297 |

|      |   |     |     |   |            |           |            |           |
|------|---|-----|-----|---|------------|-----------|------------|-----------|
| 1H6H | A | ARG | 57  | E | -14.817150 | 14.618333 | -18.273961 | -5.427478 |
| 1H6H | A | ARG | 58  | E | -13.323551 | 18.140744 | -14.264981 | -5.178655 |
| 1H6H | A | TYR | 59  | H | -13.197879 | 18.284676 | -14.431830 | -5.257499 |
| 1H6H | A | ARG | 60  | H | -11.524135 | 14.664410 | -13.280922 | -4.913788 |
| 1H6H | A | GLN | 61  | H | -11.491178 | 14.816788 | -13.331810 | -4.929804 |
| 1H6H | A | PHE | 62  | H | -11.492811 | 14.820974 | -13.318091 | -4.928867 |
| 1H6H | A | HIS | 63  | H | -11.505403 | 14.598915 | -13.391692 | -4.923309 |
| 1H6H | A | ALA | 64  | H | -11.508119 | 14.525777 | -13.409871 | -4.916715 |
| 1H6H | A | LEU | 65  | H | -12.969248 | 15.491893 | -15.619850 | -5.184657 |
| 1H6H | A | GLN | 66  | H | -13.486618 | 11.785866 | -18.393518 | -5.186919 |
| 1H6H | A | SER | 67  | H | -10.847229 | 10.757271 | -14.469411 | -4.912235 |
| 1H6H | A | LYS | 68  | H | -10.744225 | 10.939204 | -14.565769 | -4.928267 |
| 1H6H | A | LEU | 69  | H | -10.742564 | 10.961487 | -14.569937 | -4.932365 |
| 1H6H | A | GLU | 70  | H | -10.714461 | 11.017511 | -14.653767 | -4.951113 |
| 1H6H | A | GLU | 71  | H | -10.489642 | 10.773921 | -14.610179 | -4.818517 |
| 1H6H | A | ARG | 72  | H | -9.619507  | 9.524585  | -13.362602 | -4.568270 |
| 1H6H | A | PHE | 73  | H | -7.180255  | 8.676688  | -10.070666 | -4.311145 |
| 1H6H | A | GLY | 74  | T | -3.466249  | 1.535810  | -7.956621  | -3.602323 |
| 1H6H | A | PRO | 75  | T | -3.449921  | 1.558597  | -8.013528  | -3.598414 |
| 1H6H | A | ASP | 76  | T | -3.448784  | 1.561033  | -8.021079  | -3.598214 |
| 1H6H | A | SER | 77  | T | -3.447519  | 1.564046  | -8.029188  | -3.597975 |
| 1H6H | A | LYS | 78  | T | -3.434689  | 1.592889  | -8.055305  | -3.585012 |
| 1H6H | A | SER | 79  | T | -5.077760  | 3.101702  | -9.919112  | -3.360329 |
| 1H6H | A | SER | 80  | G | -5.396552  | 3.657551  | -9.874701  | -3.305179 |
| 1H6H | A | ALA | 81  | G | -5.392821  | 3.807435  | -9.794871  | -3.301810 |
| 1H6H | A | LEU | 82  | G | -5.412424  | 4.006990  | -9.661626  | -3.302833 |
| 1H6H | A | ALA | 83  | C | -5.827301  | 6.626962  | -9.594446  | -3.703697 |
| 1H6H | A | CYS | 84  | C | -4.756039  | 8.927723  | -5.844901  | -3.491272 |
| 1H6H | A | THR | 85  | C | -4.264136  | 10.761355 | -4.533744  | -3.447336 |
| 1H6H | A | LEU | 86  | C | -4.264000  | 10.842455 | -4.495210  | -3.449741 |
| 1H6H | A | PRO | 87  | C | -4.231348  | 10.934240 | -4.603667  | -3.495556 |
| 1H6H | A | THR | 88  | C | -4.125678  | 11.241612 | -5.022125  | -3.846843 |
| 1H6H | A | LEU | 89  | C | -4.348596  | 12.310889 | -4.774829  | -4.020144 |
| 1H6H | A | PRO | 90  | C | -4.878543  | 12.069920 | -7.123101  | -4.934482 |
| 1H6H | A | ALA | 91  | C | -3.266455  | 6.050570  | -5.616851  | -3.626533 |
| 1H6H | A | LYS | 92  | C | -1.788572  | 5.886471  | -4.355835  | -3.981452 |
| 1H6H | A | VAL | 93  | C | -1.401819  | 5.721813  | -4.520043  | -4.016320 |
| 1H6H | A | TYR | 94  | C | -1.387008  | 5.745493  | -4.593841  | -4.036809 |
| 1H6H | A | VAL | 95  | C | -1.386952  | 5.744385  | -4.595479  | -4.037296 |
| 1H6H | A | GLY | 96  | C | -1.415166  | 5.703118  | -4.515180  | -4.029180 |
| 1H6H | A | VAL | 97  | C | -1.861043  | 5.068070  | -4.440083  | -3.718403 |
| 1H6H | A | LYS | 98  | H | -3.663892  | 5.768685  | -6.860496  | -4.185201 |
| 1H6H | A | GLN | 99  | H | -5.642156  | 7.301013  | -10.248314 | -4.948079 |
| 1H6H | A | GLU | 100 | H | -6.244410  | 8.782621  | -11.530029 | -5.848994 |
| 1H6H | A | ILE | 101 | H | -6.981312  | 12.488161 | -12.864434 | -7.606608 |
| 1H6H | A | ALA | 102 | H | -7.742058  | 12.961623 | -12.875960 | -6.988177 |
| 1H6H | A | GLU | 103 | H | -8.162646  | 12.089813 | -11.960229 | -5.568804 |
| 1H6H | A | MET | 104 | H | -8.593733  | 10.609458 | -11.314211 | -4.373713 |
| 1H6H | A | ARG | 105 | H | -9.925546  | 11.499712 | -12.995049 | -4.252731 |
| 1H6H | A | ILE | 106 | H | -9.610064  | 10.775051 | -12.247319 | -3.769647 |
| 1H6H | A | PRO | 107 | H | -9.181193  | 9.403985  | -12.294060 | -3.697706 |
| 1H6H | A | ALA | 108 | H | -9.217571  | 9.309594  | -12.197796 | -3.646181 |
| 1H6H | A | LEU | 109 | H | -9.318070  | 9.158480  | -12.174555 | -3.642156 |
| 1H6H | A | ASN | 110 | H | -9.336663  | 9.003771  | -12.190987 | -3.639607 |
| 1H6H | A | ALA | 111 | H | -9.536271  | 8.477891  | -12.425816 | -3.709805 |
| 1H6H | A | TYR | 112 | H | -12.212424 | 12.968613 | -15.002523 | -4.477725 |
| 1H6H | A | MET | 113 | H | -11.594125 | 14.635596 | -13.187897 | -4.397139 |
| 1H6H | A | LYS | 114 | H | -10.066719 | 12.088454 | -11.027351 | -3.520056 |
| 1H6H | A | SER | 115 | H | -9.920803  | 12.733671 | -10.839511 | -3.521854 |
| 1H6H | A | LEU | 116 | H | -9.847885  | 13.093231 | -10.702617 | -3.499382 |
| 1H6H | A | LEU | 117 | H | -8.721435  | 12.349763 | -9.296906  | -3.396063 |
| 1H6H | A | SER | 118 | C | -8.396815  | 11.608541 | -9.657145  | -3.445835 |
| 1H6H | A | LEU | 119 | C | -8.333686  | 11.802500 | -9.553171  | -3.435967 |
| 1H6H | A | PRO | 120 | C | -8.280709  | 12.009569 | -9.468246  | -3.424202 |
| 1H6H | A | VAL | 121 | H | -8.280257  | 12.020455 | -9.470182  | -3.429124 |
| 1H6H | A | TRP | 122 | H | -8.586827  | 11.885917 | -9.755057  | -3.463859 |
| 1H6H | A | VAL | 123 | H | -9.083709  | 13.633603 | -9.328513  | -3.433373 |
| 1H6H | A | LEU | 124 | H | -9.529269  | 14.342010 | -9.373117  | -3.514228 |
| 1H6H | A | MET | 125 | H | -10.306933 | 13.049638 | -12.871359 | -4.529282 |
| 1H6H | A | ASP | 126 | C | -10.515981 | 11.602715 | -14.018718 | -4.788469 |
| 1H6H | A | GLU | 127 | H | -10.369394 | 10.941963 | -14.254993 | -4.652727 |
| 1H6H | A | ASP | 128 | H | -10.638145 | 9.790746  | -15.009399 | -4.699829 |
| 1H6H | A | VAL | 129 | H | -10.686992 | 9.648297  | -14.928286 | -4.655175 |
| 1H6H | A | ARG | 130 | H | -11.238972 | 8.751776  | -15.193906 | -4.199588 |
| 1H6H | A | ILE | 131 | H | -11.258131 | 8.732183  | -15.101587 | -4.179302 |
| 1H6H | A | PHE | 132 | H | -14.189043 | 15.930064 | -16.258569 | -4.693822 |
| 1H6H | A | PHE | 133 | H | -13.998698 | 15.801346 | -16.813576 | -5.338070 |
| 1H6H | A | TYR | 134 | C | -11.491936 | 10.235223 | -16.090898 | -5.339389 |
| 1H6H | A | GLN | 135 | C | -9.586255  | 10.139765 | -17.045135 | -7.680980 |
| 1H6H | A | SER | 136 | C | -8.421469  | 9.049445  | -15.664311 | -7.313511 |
| 1H6H | A | PRO | 137 | H | -7.454641  | 9.238412  | -13.951140 | -6.973941 |

|      |   |     |     |   |            |           |            |           |
|------|---|-----|-----|---|------------|-----------|------------|-----------|
| 1H6H | A | TYR | 138 | H | -7.302726  | 9.168658  | -13.883406 | -6.810398 |
| 1H6H | A | ASP | 139 | H | -7.005463  | 8.150426  | -13.344729 | -6.151112 |
| 1H6H | A | SER | 140 | H | -4.685036  | 5.030433  | -8.069501  | -3.859981 |
| 1H6H | A | GLU | 141 | H | -3.289121  | 4.059633  | -5.820842  | -2.957688 |
| 1H6H | A | GLN | 142 | C | -3.289121  | 4.059633  | -5.820842  | -2.957688 |
| 1H6H | A | VAL | 143 | C | -3.289121  | 4.059633  | -5.820842  | -2.957688 |
| 1H6H | A | PRO | 144 | C | -3.289121  | 4.059633  | -5.820842  | -2.957688 |
| 1HDO | A | MET | 1   | C | -2.856840  | 4.705653  | -4.949980  | -2.925842 |
| 1HDO | A | ALA | 2   | C | -2.856840  | 4.705653  | -4.949980  | -2.925842 |
| 1HDO | A | VAL | 3   | C | -2.856840  | 4.705653  | -4.949980  | -2.925842 |
| 1HDO | A | LYS | 4   | C | -2.856840  | 4.705653  | -4.949980  | -2.925842 |
| 1HDO | A | LYS | 5   | E | -6.535638  | 6.917654  | -10.479220 | -4.377157 |
| 1HDO | A | ILE | 6   | E | -8.465577  | 10.802531 | -11.962399 | -5.128290 |
| 1HDO | A | ALA | 7   | E | -9.908345  | 15.247481 | -11.658021 | -4.736777 |
| 1HDO | A | ILE | 8   | E | -9.512246  | 16.871061 | -9.673579  | -4.413563 |
| 1HDO | A | PHE | 9   | E | -8.721971  | 14.817567 | -10.155672 | -4.795058 |
| 1HDO | A | GLY | 10  | T | -8.433494  | 12.848757 | -11.380085 | -5.008721 |
| 1HDO | A | ALA | 11  | T | -8.363214  | 12.651546 | -11.631872 | -5.095904 |
| 1HDO | A | THR | 12  | T | -7.813051  | 11.123165 | -12.256378 | -5.615974 |
| 1HDO | A | GLY | 13  | T | -7.766511  | 10.697390 | -12.501631 | -5.612522 |
| 1HDO | A | GLN | 14  | H | -7.848201  | 10.139797 | -12.895167 | -5.720900 |
| 1HDO | A | THR | 15  | H | -7.921944  | 10.260469 | -12.828953 | -5.760173 |
| 1HDO | A | GLY | 16  | H | -7.955239  | 10.164632 | -12.815451 | -5.765610 |
| 1HDO | A | LEU | 17  | H | -8.841256  | 10.054159 | -13.477156 | -5.176777 |
| 1HDO | A | THR | 18  | H | -9.512372  | 11.960227 | -13.315034 | -5.028335 |
| 1HDO | A | THR | 19  | H | -9.762848  | 12.264662 | -13.046627 | -4.871509 |
| 1HDO | A | LEU | 20  | H | -10.424109 | 13.082840 | -13.048196 | -4.569527 |
| 1HDO | A | ALA | 21  | H | -10.824433 | 12.905489 | -13.260600 | -4.374254 |
| 1HDO | A | GLN | 22  | H | -10.522323 | 9.580100  | -14.224441 | -4.193635 |
| 1HDO | A | ALA | 23  | H | -6.767801  | 6.486339  | -9.890824  | -3.601063 |
| 1HDO | A | VAL | 24  | H | -6.673536  | 6.961372  | -9.958048  | -3.696307 |
| 1HDO | A | GLN | 25  | H | -6.669500  | 6.984375  | -9.987789  | -3.708884 |
| 1HDO | A | ALA | 26  | H | -6.667483  | 7.002184  | -9.996816  | -3.712891 |
| 1HDO | A | GLY | 27  | C | -6.668141  | 7.000672  | -9.992432  | -3.712677 |
| 1HDO | A | TYR | 28  | C | -7.767768  | 9.806459  | -10.581320 | -4.320568 |
| 1HDO | A | GLU | 29  | E | -9.360277  | 11.100256 | -13.798809 | -5.309286 |
| 1HDO | A | VAL | 30  | E | -9.876723  | 12.885749 | -12.550330 | -4.737771 |
| 1HDO | A | THR | 31  | E | -10.369674 | 15.017463 | -11.454709 | -3.998227 |
| 1HDO | A | VAL | 32  | E | -9.835668  | 13.726294 | -11.046739 | -3.805757 |
| 1HDO | A | LEU | 33  | E | -9.292598  | 12.713288 | -11.093813 | -3.937232 |
| 1HDO | A | VAL | 34  | E | -7.631399  | 8.635326  | -10.294067 | -3.765717 |
| 1HDO | A | ARG | 35  | T | -6.955536  | 7.768056  | -10.477409 | -3.922395 |
| 1HDO | A | ASP | 36  | T | -6.641726  | 8.521037  | -10.131979 | -4.057469 |
| 1HDO | A | SER | 37  | G | -6.621679  | 8.601815  | -10.156637 | -4.065717 |
| 1HDO | A | SER | 38  | G | -6.618817  | 8.606167  | -10.173245 | -4.070532 |
| 1HDO | A | ARG | 39  | G | -6.673357  | 8.764272  | -10.196151 | -4.135243 |
| 1HDO | A | LEU | 40  | C | -4.804633  | 7.120157  | -7.568281  | -3.922789 |
| 1HDO | A | PRO | 41  | C | -3.955465  | 5.881092  | -7.224343  | -3.766362 |
| 1HDO | A | SER | 42  | C | -3.806495  | 5.875032  | -7.250372  | -3.692469 |
| 1HDO | A | GLU | 43  | C | -3.791736  | 5.949853  | -7.258075  | -3.689573 |
| 1HDO | A | GLY | 44  | C | -3.789777  | 5.964245  | -7.259349  | -3.688416 |
| 1HDO | A | PRO | 45  | C | -3.904715  | 5.728222  | -7.202037  | -3.637873 |
| 1HDO | A | ARG | 46  | C | -4.621091  | 6.255570  | -7.379205  | -3.445637 |
| 1HDO | A | PRO | 47  | T | -5.829017  | 9.325316  | -7.784946  | -3.591640 |
| 1HDO | A | ALA | 48  | T | -6.357076  | 10.105282 | -8.572015  | -3.684307 |
| 1HDO | A | HIS | 49  | E | -6.347984  | 9.615959  | -9.035403  | -3.858530 |
| 1HDO | A | VAL | 50  | E | -6.046827  | 9.559130  | -9.000535  | -4.024064 |
| 1HDO | A | VAL | 51  | E | -6.068044  | 9.475678  | -8.990514  | -4.016429 |
| 1HDO | A | VAL | 52  | E | -6.080009  | 9.402905  | -9.104779  | -4.077242 |
| 1HDO | A | GLY | 53  | C | -6.205221  | 9.500080  | -9.385290  | -4.257414 |
| 1HDO | A | ASP | 54  | T | -6.341675  | 9.795202  | -9.365054  | -4.325903 |
| 1HDO | A | VAL | 55  | T | -6.845300  | 10.180820 | -10.105949 | -4.300588 |
| 1HDO | A | LEU | 56  | T | -6.754815  | 9.511601  | -10.368660 | -4.297437 |
| 1HDO | A | GLN | 57  | T | -6.883046  | 9.089027  | -10.667558 | -4.272758 |
| 1HDO | A | ALA | 58  | H | -7.096494  | 8.637442  | -10.842675 | -4.119038 |
| 1HDO | A | ALA | 59  | H | -7.214267  | 8.301449  | -10.942838 | -4.094431 |
| 1HDO | A | ASP | 60  | H | -7.494650  | 7.633923  | -11.527565 | -4.256199 |
| 1HDO | A | VAL | 61  | H | -8.405575  | 8.362984  | -12.142230 | -4.124807 |
| 1HDO | A | ASP | 62  | H | -9.229334  | 9.771844  | -13.298477 | -4.340865 |
| 1HDO | A | LYS | 63  | H | -7.633797  | 9.547588  | -10.583126 | -4.396644 |
| 1HDO | A | THR | 64  | H | -7.571961  | 9.647614  | -10.734898 | -4.459992 |
| 1HDO | A | VAL | 65  | H | -7.544047  | 9.634836  | -10.858652 | -4.483027 |
| 1HDO | A | ALA | 66  | T | -7.520663  | 9.559104  | -10.993205 | -4.507904 |
| 1HDO | A | GLY | 67  | T | -7.527888  | 9.549010  | -10.981708 | -4.512987 |
| 1HDO | A | GLN | 68  | T | -8.477178  | 9.755533  | -13.023650 | -4.971840 |
| 1HDO | A | ASP | 69  | C | -8.855355  | 9.439925  | -13.556940 | -4.892512 |
| 1HDO | A | ALA | 70  | E | -9.157476  | 9.842092  | -13.434968 | -4.782324 |
| 1HDO | A | VAL | 71  | E | -9.859741  | 13.635433 | -11.841966 | -4.218716 |
| 1HDO | A | ILE | 72  | E | -9.077876  | 16.526588 | -8.804136  | -4.220977 |
| 1HDO | A | VAL | 73  | E | -8.839444  | 16.055916 | -9.271133  | -4.380436 |
| 1HDO | A | LEU | 74  | C | -8.769456  | 15.622951 | -9.751860  | -4.549267 |

|      |   |     |     |   |            |           |            |           |
|------|---|-----|-----|---|------------|-----------|------------|-----------|
| 1HDO | A | LEU | 75  | C | -7.582342  | 10.092422 | -11.073303 | -4.846452 |
| 1HDO | A | GLY | 76  | C | -5.466865  | 5.056265  | -10.857154 | -4.986401 |
| 1HDO | A | THR | 77  | T | -5.435537  | 5.150595  | -10.895021 | -4.974178 |
| 1HDO | A | ARG | 78  | T | -5.429693  | 5.147906  | -10.917197 | -4.967477 |
| 1HDO | A | ASN | 79  | T | -4.803702  | 5.195331  | -9.394677  | -4.201287 |
| 1HDO | A | ASP | 80  | T | -4.802063  | 5.189863  | -9.395554  | -4.194903 |
| 1HDO | A | LEU | 81  | C | -5.013966  | 5.402968  | -8.753612  | -3.837702 |
| 1HDO | A | SER | 82  | C | -4.934406  | 5.753259  | -8.710003  | -3.865015 |
| 1HDO | A | PRO | 83  | C | -4.926854  | 5.853349  | -8.707392  | -3.881750 |
| 1HDO | A | THR | 84  | C | -5.889839  | 8.428795  | -9.216402  | -4.245457 |
| 1HDO | A | THR | 85  | H | -5.930950  | 8.481590  | -9.098525  | -4.255120 |
| 1HDO | A | VAL | 86  | H | -5.997834  | 8.414199  | -8.966688  | -4.243456 |
| 1HDO | A | MET | 87  | H | -7.325591  | 11.567437 | -9.712723  | -4.959825 |
| 1HDO | A | SER | 88  | H | -10.008251 | 11.500492 | -14.740624 | -5.362891 |
| 1HDO | A | GLU | 89  | H | -10.078340 | 10.318166 | -15.128391 | -5.091094 |
| 1HDO | A | GLY | 90  | H | -10.088359 | 10.344015 | -14.762841 | -4.808962 |
| 1HDO | A | ALA | 91  | H | -10.115574 | 10.408918 | -14.578182 | -4.705002 |
| 1HDO | A | ARG | 92  | H | -10.081396 | 10.512491 | -14.405519 | -4.605681 |
| 1HDO | A | ASN | 93  | H | -9.958405  | 11.484808 | -13.208425 | -4.253819 |
| 1HDO | A | ILE | 94  | H | -9.775628  | 12.939558 | -11.862586 | -4.031160 |
| 1HDO | A | VAL | 95  | H | -9.764391  | 12.885171 | -11.874043 | -4.018465 |
| 1HDO | A | ALA | 96  | H | -9.252206  | 10.751216 | -12.380717 | -4.109366 |
| 1HDO | A | ALA | 97  | H | -9.216107  | 10.767538 | -12.455249 | -4.147020 |
| 1HDO | A | MET | 98  | H | -8.283193  | 8.989051  | -12.531496 | -4.779533 |
| 1HDO | A | LYS | 99  | H | -7.222371  | 7.759410  | -11.065386 | -4.280089 |
| 1HDO | A | ALA | 100 | H | -6.826389  | 7.453145  | -11.039865 | -4.263168 |
| 1HDO | A | HIS | 101 | H | -6.828834  | 7.450016  | -11.041171 | -4.270016 |
| 1HDO | A | GLY | 102 | C | -6.827043  | 7.462453  | -11.047269 | -4.272841 |
| 1HDO | A | VAL | 103 | C | -6.870138  | 7.373840  | -10.935166 | -4.224622 |
| 1HDO | A | ASP | 104 | C | -7.238474  | 7.215091  | -11.076078 | -4.264504 |
| 1HDO | A | LYS | 105 | E | -9.533379  | 10.755739 | -13.819739 | -5.167328 |
| 1HDO | A | VAL | 106 | E | -9.753088  | 12.354210 | -12.714845 | -4.741814 |
| 1HDO | A | VAL | 107 | E | -10.167312 | 13.532246 | -12.235329 | -4.416938 |
| 1HDO | A | ALA | 108 | E | -10.062327 | 13.105710 | -12.578428 | -4.470948 |
| 1HDO | A | CYS | 109 | E | -10.070270 | 13.103877 | -12.561305 | -4.473175 |
| 1HDO | A | THR | 110 | C | -10.039659 | 13.353056 | -12.530949 | -4.505030 |
| 1HDO | A | SER | 111 | C | -10.462192 | 13.298312 | -13.576727 | -4.793565 |
| 1HDO | A | ALA | 112 | G | -10.729542 | 14.222837 | -13.567854 | -4.915138 |
| 1HDO | A | PHE | 113 | G | -11.170057 | 18.328209 | -12.761500 | -5.332772 |
| 1HDO | A | LEU | 114 | G | -10.628799 | 17.327480 | -12.890584 | -5.593307 |
| 1HDO | A | LEU | 115 | C | -9.014921  | 12.181890 | -11.796005 | -4.855483 |
| 1HDO | A | TRP | 116 | C | -6.863573  | 7.878553  | -10.300788 | -4.312660 |
| 1HDO | A | ASP | 117 | T | -3.902904  | 5.628248  | -6.789199  | -3.688146 |
| 1HDO | A | PRO | 118 | T | -3.840616  | 5.904265  | -6.787825  | -3.671437 |
| 1HDO | A | THR | 119 | T | -3.752125  | 6.171748  | -6.777100  | -3.651492 |
| 1HDO | A | LYS | 120 | T | -3.714457  | 6.327111  | -6.759217  | -3.626172 |
| 1HDO | A | VAL | 121 | T | -3.700345  | 6.427696  | -6.722188  | -3.606456 |
| 1HDO | A | PRO | 122 | C | -4.424048  | 8.367672  | -6.617846  | -3.413637 |
| 1HDO | A | PRO | 123 | G | -4.607459  | 8.361859  | -6.568172  | -3.377640 |
| 1HDO | A | ARG | 124 | G | -5.130148  | 9.132551  | -6.392582  | -3.179374 |
| 1HDO | A | LEU | 125 | G | -5.788620  | 10.055977 | -6.226811  | -3.074155 |
| 1HDO | A | GLN | 126 | H | -7.618759  | 8.935854  | -10.808967 | -4.041230 |
| 1HDO | A | ALA | 127 | H | -9.030479  | 9.777949  | -11.734596 | -3.892141 |
| 1HDO | A | VAL | 128 | H | -11.119006 | 12.583069 | -14.992621 | -4.729067 |
| 1HDO | A | THR | 129 | H | -11.369683 | 12.043528 | -16.109233 | -5.133328 |
| 1HDO | A | ASP | 130 | H | -11.523073 | 11.457616 | -16.639543 | -5.265128 |
| 1HDO | A | ASP | 131 | H | -11.847959 | 11.509404 | -17.119318 | -5.479642 |
| 1HDO | A | HIS | 132 | H | -11.999141 | 11.562315 | -17.188301 | -5.601862 |
| 1HDO | A | ILE | 133 | H | -12.369416 | 10.945246 | -17.571525 | -5.568610 |
| 1HDO | A | ARG | 134 | H | -13.696893 | 10.968518 | -19.648391 | -5.690623 |
| 1HDO | A | MET | 135 | H | -13.838564 | 16.128347 | -17.362553 | -5.807089 |
| 1HDO | A | HIS | 136 | H | -12.852146 | 15.034087 | -15.707729 | -5.174130 |
| 1HDO | A | LYS | 137 | H | -10.301548 | 12.017355 | -12.859706 | -4.592712 |
| 1HDO | A | VAL | 138 | H | -10.276100 | 12.092844 | -12.938337 | -4.609589 |
| 1HDO | A | LEU | 139 | H | -9.608241  | 10.821550 | -13.714684 | -5.091105 |
| 1HDO | A | ARG | 140 | H | -8.861490  | 9.615753  | -13.815084 | -5.353443 |
| 1HDO | A | GLU | 141 | H | -8.761187  | 9.430863  | -14.102017 | -5.423677 |
| 1HDO | A | SER | 142 | C | -8.804726  | 9.240362  | -14.208300 | -5.490519 |
| 1HDO | A | GLY | 143 | C | -8.804676  | 9.243505  | -14.207683 | -5.491140 |
| 1HDO | A | LEU | 144 | C | -8.918029  | 9.039529  | -14.233242 | -5.526803 |
| 1HDO | A | LYS | 145 | E | -9.838023  | 8.665154  | -15.640810 | -5.785321 |
| 1HDO | A | TYR | 146 | E | -11.797328 | 14.123739 | -15.241185 | -5.373753 |
| 1HDO | A | VAL | 147 | E | -11.334978 | 14.767852 | -12.734601 | -4.251748 |
| 1HDO | A | ALA | 148 | E | -10.780643 | 14.977833 | -11.366084 | -3.838759 |
| 1HDO | A | VAL | 149 | E | -10.284917 | 14.555416 | -11.199100 | -3.844239 |
| 1HDO | A | MET | 150 | C | -9.073555  | 13.908571 | -9.970715  | -4.079433 |
| 1HDO | A | PRO | 151 | C | -7.238780  | 10.662091 | -8.623612  | -3.739126 |
| 1HDO | A | PRO | 152 | C | -6.812860  | 9.560078  | -9.362202  | -3.939608 |
| 1HDO | A | HIS | 153 | E | -6.709554  | 9.319864  | -9.819359  | -4.115600 |
| 1HDO | A | ILE | 154 | E | -6.581905  | 8.974480  | -10.251920 | -4.278160 |
| 1HDO | A | GLY | 155 | E | -5.729409  | 7.906912  | -10.050993 | -4.829104 |

|      |   |     |     |   |            |           |            |           |
|------|---|-----|-----|---|------------|-----------|------------|-----------|
| 1HDO | A | ASP | 156 | C | -5.370214  | 8.153637  | -9.646823  | -4.888944 |
| 1HDO | A | GLN | 157 | C | -5.284121  | 8.251232  | -9.669048  | -4.934274 |
| 1HDO | A | PRO | 158 | C | -3.973384  | 7.330742  | -7.064718  | -4.279220 |
| 1HDO | A | LEU | 159 | C | -3.970447  | 7.365861  | -7.065370  | -4.282611 |
| 1HDO | A | THR | 160 | C | -3.992587  | 7.367217  | -6.953569  | -4.255062 |
| 1HDO | A | GLY | 161 | C | -4.020091  | 7.320082  | -6.849072  | -4.224953 |
| 1HDO | A | ALA | 162 | C | -4.032315  | 7.290053  | -6.785951  | -4.208886 |
| 1HDO | A | TYR | 163 | C | -6.526817  | 12.135528 | -9.045787  | -4.862131 |
| 1HDO | A | THR | 164 | E | -6.954023  | 11.912155 | -9.524845  | -4.723995 |
| 1HDO | A | VAL | 165 | E | -6.964994  | 10.987378 | -9.798362  | -4.545580 |
| 1HDO | A | THR | 166 | E | -6.803990  | 7.682142  | -10.852298 | -4.239263 |
| 1HDO | A | LEU | 167 | T | -5.253000  | 5.998017  | -9.184722  | -4.186303 |
| 1HDO | A | ASP | 168 | T | -4.896771  | 5.799940  | -9.247196  | -4.188462 |
| 1HDO | A | GLY | 169 | T | -4.880726  | 5.793657  | -9.313635  | -4.198619 |
| 1HDO | A | ARG | 170 | C | -4.883523  | 5.762140  | -9.314759  | -4.194226 |
| 1HDO | A | GLY | 171 | C | -4.892013  | 5.771434  | -9.293650  | -4.200493 |
| 1HDO | A | PRO | 172 | C | -5.308722  | 5.661137  | -9.534912  | -4.217806 |
| 1HDO | A | SER | 173 | C | -6.708427  | 6.617544  | -11.590370 | -4.484084 |
| 1HDO | A | ARG | 174 | C | -7.292760  | 7.920039  | -11.403091 | -4.376280 |
| 1HDO | A | VAL | 175 | E | -7.634410  | 8.584267  | -11.151736 | -4.480489 |
| 1HDO | A | ILE | 176 | E | -9.708798  | 12.118315 | -12.532303 | -4.358024 |
| 1HDO | A | SER | 177 | E | -10.205154 | 12.539081 | -13.473170 | -4.785278 |
| 1HDO | A | LYS | 178 | H | -10.248062 | 13.130120 | -13.629177 | -5.120322 |
| 1HDO | A | HIS | 179 | H | -10.733584 | 13.006839 | -15.041358 | -5.573745 |
| 1HDO | A | ASP | 180 | H | -10.945574 | 12.873705 | -15.455573 | -5.732807 |
| 1HDO | A | LEU | 181 | H | -10.884835 | 13.408372 | -15.138635 | -5.691106 |
| 1HDO | A | GLY | 182 | H | -10.890673 | 13.542612 | -15.039952 | -5.674397 |
| 1HDO | A | HIS | 183 | H | -11.448681 | 14.507228 | -14.962494 | -5.387636 |
| 1HDO | A | PHE | 184 | H | -11.714508 | 16.179688 | -14.235300 | -5.385044 |
| 1HDO | A | MET | 185 | H | -11.851122 | 16.554016 | -14.046369 | -5.419145 |
| 1HDO | A | LEU | 186 | H | -11.813516 | 14.172338 | -14.756141 | -5.049778 |
| 1HDO | A | ARG | 187 | H | -10.801385 | 11.304452 | -14.728623 | -5.031497 |
| 1HDO | A | CYS | 188 | H | -9.510433  | 9.634168  | -14.010012 | -5.111571 |
| 1HDO | A | LEU | 189 | T | -8.683968  | 9.498213  | -13.204710 | -5.109392 |
| 1HDO | A | THR | 190 | T | -8.286249  | 10.066619 | -12.997400 | -5.341486 |
| 1HDO | A | THR | 191 | T | -8.205955  | 10.214558 | -13.074338 | -5.401355 |
| 1HDO | A | ASP | 192 | T | -8.063884  | 10.258010 | -13.152386 | -5.498642 |
| 1HDO | A | GLU | 193 | T | -8.084169  | 10.344986 | -13.142615 | -5.533257 |
| 1HDO | A | TYR | 194 | T | -8.259734  | 10.707533 | -13.242471 | -5.687992 |
| 1HDO | A | ASP | 195 | T | -8.242358  | 9.512967  | -13.592197 | -5.501445 |
| 1HDO | A | GLY | 196 | T | -8.320722  | 9.282073  | -13.595813 | -5.450961 |
| 1HDO | A | HIS | 197 | T | -8.568358  | 8.684992  | -13.651659 | -5.255485 |
| 1HDO | A | SER | 198 | E | -8.632094  | 8.455508  | -13.578696 | -5.216482 |
| 1HDO | A | THR | 199 | E | -8.657857  | 8.302903  | -13.548621 | -5.205002 |
| 1HDO | A | TYR | 200 | E | -10.817597 | 12.480220 | -14.134268 | -5.241429 |
| 1HDO | A | PRO | 201 | E | -10.672240 | 15.927535 | -12.092157 | -5.221023 |
| 1HDO | A | SER | 202 | E | -8.719575  | 12.032763 | -10.972927 | -4.670265 |
| 1HDO | A | HIS | 203 | C | -8.719575  | 12.032763 | -10.972927 | -4.670265 |
| 1HDO | A | GLN | 204 | C | -8.719575  | 12.032763 | -10.972927 | -4.670265 |
| 1HDO | A | TYR | 205 | C | -8.719575  | 12.032763 | -10.972927 | -4.670265 |
| 1HDR | A | GLU | 8   | C | -7.811675  | 7.790085  | -10.055458 | -3.156377 |
| 1HDR | A | ALA | 9   | C | -7.811675  | 7.790085  | -10.055458 | -3.156377 |
| 1HDR | A | ARG | 10  | C | -7.811675  | 7.790085  | -10.055458 | -3.156377 |
| 1HDR | A | ARG | 11  | E | -7.811675  | 7.790085  | -10.055458 | -3.156377 |
| 1HDR | A | VAL | 12  | E | -10.102200 | 11.242583 | -11.948307 | -3.757600 |
| 1HDR | A | LEU | 13  | E | -11.560552 | 16.958715 | -12.423178 | -4.705818 |
| 1HDR | A | VAL | 14  | E | -11.352197 | 16.342629 | -12.892308 | -4.847943 |
| 1HDR | A | TYR | 15  | E | -10.861858 | 13.723067 | -14.354601 | -5.289434 |
| 1HDR | A | GLY | 16  | T | -7.688131  | 6.939015  | -12.650455 | -4.978412 |
| 1HDR | A | GLY | 17  | T | -7.540503  | 7.628831  | -12.451760 | -4.948011 |
| 1HDR | A | ARG | 18  | T | -7.285820  | 8.553316  | -11.894380 | -4.885163 |
| 1HDR | A | GLY | 19  | T | -7.266177  | 8.570209  | -11.934719 | -4.878578 |
| 1HDR | A | ALA | 20  | H | -7.266935  | 8.566227  | -11.930210 | -4.877603 |
| 1HDR | A | LEU | 21  | H | -7.664583  | 10.153413 | -11.249047 | -4.782573 |
| 1HDR | A | GLY | 22  | H | -7.852733  | 10.183908 | -11.062006 | -4.761006 |
| 1HDR | A | SER | 23  | H | -9.287454  | 9.137536  | -13.146265 | -4.688317 |
| 1HDR | A | ARG | 24  | H | -12.999955 | 12.011863 | -17.999379 | -5.193291 |
| 1HDR | A | CYS | 25  | H | -13.123920 | 12.386686 | -18.003139 | -5.211487 |
| 1HDR | A | VAL | 26  | H | -13.193408 | 12.418790 | -17.856141 | -5.167552 |
| 1HDR | A | GLN | 27  | H | -13.176876 | 12.632526 | -17.722484 | -5.148576 |
| 1HDR | A | ALA | 28  | H | -12.979498 | 12.862324 | -17.213023 | -4.914779 |
| 1HDR | A | PHE | 29  | H | -11.835944 | 12.127081 | -14.974875 | -4.559195 |
| 1HDR | A | ARG | 30  | H | -10.863210 | 11.435882 | -14.306650 | -4.630551 |
| 1HDR | A | ALA | 31  | H | -10.814330 | 11.738107 | -14.330891 | -4.683492 |
| 1HDR | A | ARG | 32  | H | -10.813490 | 11.758913 | -14.326351 | -4.685071 |
| 1HDR | A | ASN | 33  | C | -10.815452 | 11.775959 | -14.314898 | -4.689646 |
| 1HDR | A | TRP | 34  | C | -10.920542 | 11.744077 | -14.221104 | -4.720160 |
| 1HDR | A | TRP | 35  | E | -12.124227 | 15.829225 | -14.525263 | -5.162334 |
| 1HDR | A | VAL | 36  | E | -12.060780 | 13.798297 | -14.256853 | -4.218433 |
| 1HDR | A | ALA | 37  | E | -11.302977 | 11.799427 | -14.131763 | -4.075016 |
| 1HDR | A | SER | 38  | E | -9.432609  | 9.899273  | -12.408693 | -4.166111 |

|      |   |     |     |   |            |           |            |           |
|------|---|-----|-----|---|------------|-----------|------------|-----------|
| 1HDR | A | VAL | 39  | E | -7.815359  | 10.498314 | -10.468506 | -4.493469 |
| 1HDR | A | ASP | 40  | E | -7.759731  | 10.411338 | -10.791124 | -4.597767 |
| 1HDR | A | VAL | 41  | T | -7.223404  | 9.050371  | -11.733047 | -5.092238 |
| 1HDR | A | VAL | 42  | T | -7.041031  | 8.744255  | -12.220065 | -5.327529 |
| 1HDR | A | GLU | 43  | T | -6.739588  | 8.650747  | -12.246001 | -5.533011 |
| 1HDR | A | ASN | 44  | T | -6.817484  | 8.302589  | -12.649059 | -5.713849 |
| 1HDR | A | GLU | 45  | T | -6.781689  | 8.243294  | -12.635319 | -5.648010 |
| 1HDR | A | GLU | 46  | T | -6.967871  | 8.315486  | -12.750506 | -5.723222 |
| 1HDR | A | ALA | 47  | T | -7.113469  | 8.507434  | -12.480620 | -5.618742 |
| 1HDR | A | SER | 48  | T | -7.935473  | 8.580684  | -13.039193 | -4.960835 |
| 1HDR | A | ALA | 49  | E | -8.041522  | 8.993791  | -12.523521 | -4.701601 |
| 1HDR | A | SER | 50  | E | -8.616220  | 11.189515 | -12.070908 | -4.485759 |
| 1HDR | A | ILE | 51  | E | -8.580728  | 12.116692 | -11.282795 | -4.300805 |
| 1HDR | A | ILE | 52  | E | -7.607847  | 10.647459 | -10.532671 | -4.611484 |
| 1HDR | A | VAL | 53  | C | -6.729908  | 9.353810  | -10.538088 | -4.949210 |
| 1HDR | A | LYS | 54  | C | -6.547847  | 8.642740  | -11.125848 | -5.066419 |
| 1HDR | A | MET | 55  | C | -6.520272  | 8.712836  | -11.156978 | -5.066815 |
| 1HDR | A | THR | 56  | C | -6.481583  | 8.756945  | -11.177237 | -5.058466 |
| 1HDR | A | ASP | 57  | C | -6.533623  | 8.525244  | -11.340292 | -5.102565 |
| 1HDR | A | SER | 58  | C | -7.021969  | 7.922083  | -12.346650 | -5.183694 |
| 1HDR | A | PHE | 59  | H | -7.564416  | 9.637987  | -11.795803 | -4.917553 |
| 1HDR | A | THR | 60  | H | -7.743560  | 9.381860  | -11.842502 | -4.868034 |
| 1HDR | A | GLU | 61  | H | -8.304627  | 8.626515  | -12.562782 | -4.870445 |
| 1HDR | A | GLN | 62  | H | -10.081312 | 9.105902  | -15.660574 | -5.373669 |
| 1HDR | A | ALA | 63  | H | -10.154802 | 8.763165  | -15.695425 | -5.348853 |
| 1HDR | A | ASP | 64  | H | -10.231167 | 8.209700  | -15.814241 | -5.311115 |
| 1HDR | A | GLN | 65  | H | -11.994265 | 9.835686  | -17.730439 | -5.080764 |
| 1HDR | A | VAL | 66  | H | -10.858249 | 12.103835 | -13.782608 | -4.462628 |
| 1HDR | A | THR | 67  | H | -10.248152 | 10.611527 | -14.309851 | -4.703053 |
| 1HDR | A | ALA | 68  | H | -7.983404  | 6.762601  | -11.997951 | -4.052643 |
| 1HDR | A | GLU | 69  | H | -7.543251  | 8.177509  | -11.269346 | -4.138824 |
| 1HDR | A | VAL | 70  | H | -7.287245  | 9.250074  | -10.580821 | -4.067059 |
| 1HDR | A | GLY | 71  | H | -6.465152  | 7.852788  | -10.191511 | -4.189269 |
| 1HDR | A | LYS | 72  | H | -6.268973  | 7.710303  | -10.281309 | -4.189961 |
| 1HDR | A | LEU | 73  | H | -6.244714  | 7.853639  | -10.291457 | -4.247005 |
| 1HDR | A | LEU | 74  | H | -6.215956  | 7.732780  | -10.467827 | -4.327866 |
| 1HDR | A | GLY | 75  | T | -6.207608  | 7.508001  | -10.666312 | -4.386306 |
| 1HDR | A | GLU | 76  | T | -6.601923  | 7.619000  | -11.237282 | -4.534271 |
| 1HDR | A | GLU | 77  | T | -7.007623  | 7.879842  | -11.941550 | -4.869437 |
| 1HDR | A | LYS | 78  | C | -7.248281  | 7.477905  | -12.247160 | -4.942535 |
| 1HDR | A | VAL | 79  | E | -7.775412  | 7.374996  | -12.353531 | -4.839210 |
| 1HDR | A | ASP | 80  | E | -11.234887 | 11.633281 | -15.542171 | -5.051608 |
| 1HDR | A | ALA | 81  | E | -11.140098 | 15.987669 | -12.011938 | -4.250594 |
| 1HDR | A | ILE | 82  | E | -10.878628 | 16.091910 | -11.783894 | -4.216773 |
| 1HDR | A | LEU | 83  | E | -9.305734  | 12.579434 | -11.186078 | -4.374178 |
| 1HDR | A | CYS | 84  | E | -7.137969  | 8.386907  | -10.769752 | -4.617201 |
| 1HDR | A | VAL | 85  | C | -6.391724  | 9.371192  | -9.552268  | -4.509817 |
| 1HDR | A | ALA | 86  | C | -6.306427  | 9.213059  | -9.793174  | -4.535225 |
| 1HDR | A | GLY | 87  | C | -5.091010  | 7.240078  | -9.485912  | -4.969487 |
| 1HDR | A | GLY | 88  | C | -5.005733  | 7.215141  | -9.636586  | -4.970949 |
| 1HDR | A | TRP | 89  | C | -5.016497  | 7.195064  | -9.631175  | -4.982986 |
| 1HDR | A | ALA | 90  | C | -5.058190  | 7.002339  | -9.683044  | -5.021788 |
| 1HDR | A | GLY | 91  | C | -5.051483  | 6.924313  | -9.750158  | -5.025979 |
| 1HDR | A | GLY | 92  | B | -6.012941  | 6.700780  | -11.254663 | -4.977163 |
| 1HDR | A | ASN | 93  | T | -6.321024  | 4.735871  | -12.431515 | -4.586890 |
| 1HDR | A | ALA | 94  | T | -6.264059  | 4.323610  | -12.489973 | -4.471665 |
| 1HDR | A | LYS | 95  | T | -6.272411  | 4.269133  | -12.481717 | -4.461271 |
| 1HDR | A | SER | 96  | T | -6.410984  | 4.128787  | -12.323293 | -4.318863 |
| 1HDR | A | LYS | 97  | C | -6.451849  | 4.142905  | -12.208735 | -4.256380 |
| 1HDR | A | SER | 98  | H | -7.147090  | 4.487998  | -12.869529 | -4.221956 |
| 1HDR | A | LEU | 99  | H | -7.899696  | 6.529266  | -13.061827 | -4.333900 |
| 1HDR | A | PHE | 100 | H | -7.945571  | 6.574140  | -12.971200 | -4.334651 |
| 1HDR | A | LYS | 101 | H | -8.012745  | 6.552683  | -12.857794 | -4.330636 |
| 1HDR | A | ASN | 102 | H | -9.226627  | 8.216152  | -14.561791 | -4.789487 |
| 1HDR | A | CYS | 103 | H | -9.681320  | 8.790675  | -14.857163 | -4.970808 |
| 1HDR | A | ASP | 104 | H | -10.309420 | 8.195650  | -16.112528 | -5.248916 |
| 1HDR | A | LEU | 105 | H | -11.193405 | 8.373150  | -16.873396 | -5.322378 |
| 1HDR | A | MET | 106 | H | -14.111868 | 11.949262 | -20.150102 | -5.856553 |
| 1HDR | A | TRP | 107 | H | -14.536072 | 12.398048 | -20.049143 | -5.745810 |
| 1HDR | A | LYS | 108 | H | -15.406366 | 13.440559 | -21.047207 | -5.906857 |
| 1HDR | A | GLN | 109 | H | -15.234865 | 15.590245 | -19.387131 | -5.767062 |
| 1HDR | A | SER | 110 | H | -14.075281 | 15.631794 | -17.298457 | -5.502319 |
| 1HDR | A | ILE | 111 | H | -12.098698 | 15.579603 | -14.044722 | -5.103401 |
| 1HDR | A | TRP | 112 | H | -12.034656 | 15.751067 | -14.141600 | -5.128972 |
| 1HDR | A | THR | 113 | H | -11.850249 | 14.960469 | -14.693941 | -5.154653 |
| 1HDR | A | SER | 114 | H | -11.802486 | 14.769183 | -14.874797 | -5.152734 |
| 1HDR | A | THR | 115 | H | -11.168370 | 12.491455 | -15.014059 | -5.034158 |
| 1HDR | A | ILE | 116 | H | -11.224468 | 11.986906 | -15.281722 | -5.028562 |
| 1HDR | A | SER | 117 | H | -11.165056 | 11.965867 | -15.332853 | -5.019899 |
| 1HDR | A | SER | 118 | H | -11.069082 | 12.175223 | -15.089036 | -4.941931 |
| 1HDR | A | HIS | 119 | H | -10.348720 | 12.584267 | -13.594552 | -4.837104 |

|      |   |     |     |   |            |           |            |           |
|------|---|-----|-----|---|------------|-----------|------------|-----------|
| 1HDR | A | LEU | 120 | H | -10.421162 | 12.959971 | -13.344869 | -4.824473 |
| 1HDR | A | ALA | 121 | H | -10.418670 | 13.014999 | -13.324132 | -4.826649 |
| 1HDR | A | THR | 122 | H | -10.437812 | 13.025722 | -13.251092 | -4.821821 |
| 1HDR | A | LYS | 123 | H | -10.461674 | 13.113276 | -13.217642 | -4.861679 |
| 1HDR | A | HIS | 124 | H | -10.794663 | 13.643593 | -14.095295 | -5.265611 |
| 1HDR | A | LEU | 125 | E | -8.280713  | 9.433674  | -12.194795 | -5.019997 |
| 1HDR | A | LYS | 126 | E | -7.886110  | 9.407046  | -12.260724 | -5.069956 |
| 1HDR | A | GLU | 127 | E | -7.700885  | 10.069757 | -11.867298 | -4.995558 |
| 1HDR | A | GLY | 128 | E | -7.694132  | 10.100780 | -11.877252 | -4.994550 |
| 1HDR | A | GLY | 129 | E | -7.695334  | 10.102136 | -11.869106 | -4.993167 |
| 1HDR | A | LEU | 130 | E | -7.966574  | 10.523579 | -11.694457 | -4.979441 |
| 1HDR | A | LEU | 131 | E | -8.442059  | 11.993434 | -10.910603 | -4.797509 |
| 1HDR | A | THR | 132 | E | -9.944756  | 13.641438 | -12.689520 | -4.794354 |
| 1HDR | A | LEU | 133 | E | -10.337485 | 14.384213 | -12.687755 | -4.657807 |
| 1HDR | A | ALA | 134 | E | -9.979488  | 11.906100 | -13.396874 | -4.612990 |
| 1HDR | A | GLY | 135 | C | -8.771334  | 11.226649 | -12.220832 | -4.856886 |
| 1HDR | A | ALA | 136 | C | -8.452670  | 12.296290 | -12.975340 | -5.876317 |
| 1HDR | A | LYS | 137 | G | -7.521401  | 10.913742 | -10.903079 | -4.890019 |
| 1HDR | A | ALA | 138 | G | -5.142817  | 8.011849  | -7.654733  | -4.051333 |
| 1HDR | A | ALA | 139 | G | -4.859223  | 8.340685  | -7.704992  | -4.139206 |
| 1HDR | A | LEU | 140 | G | -4.243104  | 7.177670  | -7.718343  | -4.174272 |
| 1HDR | A | ASP | 141 | C | -3.332771  | 4.929332  | -7.840951  | -4.369282 |
| 1HDR | A | GLY | 142 | C | -3.279298  | 5.088603  | -7.896499  | -4.394018 |
| 1HDR | A | THR | 143 | T | -3.304338  | 4.964559  | -7.910125  | -4.408395 |
| 1HDR | A | PRO | 144 | T | -3.320824  | 4.852910  | -7.913416  | -4.411140 |
| 1HDR | A | GLY | 145 | T | -3.408254  | 4.580015  | -7.935513  | -4.441572 |
| 1HDR | A | MET | 146 | B | -4.720468  | 6.803304  | -8.477855  | -4.619777 |
| 1HDR | A | ILE | 147 | H | -7.121791  | 8.864292  | -10.495391 | -4.346340 |
| 1HDR | A | GLY | 148 | H | -8.047332  | 7.953115  | -11.988894 | -4.479592 |
| 1HDR | A | TYR | 149 | H | -10.572069 | 12.377230 | -14.689038 | -5.186211 |
| 1HDR | A | GLY | 150 | H | -10.436146 | 11.368305 | -15.129726 | -5.198876 |
| 1HDR | A | MET | 151 | H | -10.362996 | 10.878602 | -15.246933 | -5.130637 |
| 1HDR | A | ALA | 152 | H | -10.525415 | 10.466700 | -15.627439 | -5.099944 |
| 1HDR | A | LYS | 153 | H | -10.678758 | 10.034229 | -15.930646 | -5.109176 |
| 1HDR | A | GLY | 154 | H | -10.639527 | 10.079358 | -15.935841 | -5.086532 |
| 1HDR | A | ALA | 155 | H | -10.900083 | 10.917068 | -15.596844 | -4.955681 |
| 1HDR | A | VAL | 156 | H | -11.289551 | 11.896470 | -15.433417 | -4.892195 |
| 1HDR | A | HIS | 157 | H | -11.789714 | 12.104980 | -16.037979 | -4.951337 |
| 1HDR | A | GLN | 158 | H | -11.890964 | 11.667626 | -16.254947 | -4.916336 |
| 1HDR | A | LEU | 159 | H | -12.308412 | 12.438170 | -16.752133 | -5.137197 |
| 1HDR | A | CYS | 160 | H | -12.419442 | 11.383142 | -20.091119 | -6.910694 |
| 1HDR | A | GLN | 161 | H | -10.750358 | 10.026291 | -16.740387 | -5.968960 |
| 1HDR | A | SER | 162 | H | -8.962504  | 8.100729  | -13.941121 | -4.992034 |
| 1HDR | A | LEU | 163 | H | -5.589526  | 6.392936  | -9.529795  | -4.446763 |
| 1HDR | A | ALA | 164 | H | -4.691107  | 3.851395  | -9.983965  | -4.352816 |
| 1HDR | A | GLY | 165 | T | -3.310467  | 2.213429  | -9.405030  | -4.697318 |
| 1HDR | A | LYS | 166 | T | -3.271532  | 2.494986  | -9.408645  | -4.726464 |
| 1HDR | A | ASN | 167 | T | -3.271075  | 2.500922  | -9.409639  | -4.726771 |
| 1HDR | A | SER | 168 | T | -3.282761  | 2.425112  | -9.406714  | -4.731749 |
| 1HDR | A | GLY | 169 | C | -3.316493  | 2.475005  | -9.338530  | -4.757478 |
| 1HDR | A | MET | 170 | C | -4.737487  | 7.066941  | -9.307940  | -4.972376 |
| 1HDR | A | PRO | 171 | T | -5.450954  | 8.372849  | -8.988938  | -4.377335 |
| 1HDR | A | PRO | 172 | T | -5.450845  | 8.314969  | -8.968150  | -4.337719 |
| 1HDR | A | GLY | 173 | T | -5.460725  | 8.293213  | -8.937682  | -4.330111 |
| 1HDR | A | ALA | 174 | T | -6.156010  | 8.738512  | -9.072889  | -3.864674 |
| 1HDR | A | ALA | 175 | E | -6.394856  | 8.357674  | -8.964927  | -3.674611 |
| 1HDR | A | ALA | 176 | E | -7.387974  | 8.678207  | -10.243846 | -3.892167 |
| 1HDR | A | ILE | 177 | E | -8.577711  | 11.708527 | -10.336423 | -4.001537 |
| 1HDR | A | ALA | 178 | E | -9.689111  | 14.594050 | -10.392213 | -3.487826 |
| 1HDR | A | VAL | 179 | E | -8.321631  | 14.326696 | -8.135471  | -3.683149 |
| 1HDR | A | LEU | 180 | E | -7.297200  | 14.513620 | -7.271509  | -4.004012 |
| 1HDR | A | PRO | 181 | T | -7.262105  | 14.359876 | -7.476945  | -4.028255 |
| 1HDR | A | VAL | 182 | T | -7.253268  | 14.335872 | -7.546699  | -4.046388 |
| 1HDR | A | THR | 183 | T | -7.255843  | 14.332896 | -7.542022  | -4.051773 |
| 1HDR | A | LEU | 184 | B | -7.350881  | 14.322913 | -7.502236  | -4.119587 |
| 1HDR | A | ASP | 185 | C | -8.581238  | 11.216092 | -12.110430 | -4.742774 |
| 1HDR | A | THR | 186 | C | -8.916310  | 10.225660 | -13.990054 | -5.284832 |
| 1HDR | A | PRO | 187 | H | -8.893296  | 8.502429  | -14.997454 | -5.331015 |
| 1HDR | A | MET | 188 | H | -8.881655  | 8.390273  | -15.072415 | -5.327716 |
| 1HDR | A | ASN | 189 | H | -8.916965  | 8.217899  | -15.184161 | -5.357715 |
| 1HDR | A | ARG | 190 | H | -9.002935  | 8.440664  | -14.877563 | -5.083039 |
| 1HDR | A | LYS | 191 | T | -6.839833  | 5.653528  | -11.317277 | -4.210180 |
| 1HDR | A | SER | 192 | T | -5.116561  | 6.262700  | -8.384357  | -3.862537 |
| 1HDR | A | MET | 193 | T | -4.718121  | 6.293202  | -8.528089  | -4.037911 |
| 1HDR | A | PRO | 194 | T | -4.697394  | 6.367156  | -8.569216  | -4.048541 |
| 1HDR | A | GLU | 195 | T | -4.696923  | 6.369018  | -8.572247  | -4.049026 |
| 1HDR | A | ALA | 196 | T | -4.712738  | 6.389548  | -8.499801  | -4.044957 |
| 1HDR | A | ASP | 197 | C | -5.098657  | 6.471063  | -8.754771  | -4.228832 |
| 1HDR | A | PHE | 198 | G | -6.676963  | 8.446680  | -9.809442  | -4.352582 |
| 1HDR | A | SER | 199 | G | -8.776351  | 8.648104  | -12.740194 | -4.613904 |
| 1HDR | A | SER | 200 | G | -11.102302 | 9.336620  | -15.380526 | -4.551014 |



|      |   |     |     |   |            |           |            |           |
|------|---|-----|-----|---|------------|-----------|------------|-----------|
| 1HDR | A | TRP | 201 | C | -12.672660 | 15.151620 | -15.967946 | -5.277372 |
| 1HDR | A | THR | 202 | B | -12.033264 | 14.845095 | -14.650688 | -5.093408 |
| 1HDR | A | PRO | 203 | C | -11.555440 | 15.957944 | -13.576267 | -4.987415 |
| 1HDR | A | LEU | 204 | H | -11.546836 | 16.016838 | -13.575044 | -4.987429 |
| 1HDR | A | GLU | 205 | H | -11.386530 | 15.641526 | -13.747384 | -4.965403 |
| 1HDR | A | PHE | 206 | H | -11.092302 | 16.044644 | -13.039745 | -4.831231 |
| 1HDR | A | LEU | 207 | H | -11.153083 | 16.563437 | -12.723731 | -4.786604 |
| 1HDR | A | VAL | 208 | H | -11.345382 | 16.454307 | -12.743193 | -4.743368 |
| 1HDR | A | GLU | 209 | H | -11.333252 | 16.385916 | -12.845684 | -4.772628 |
| 1HDR | A | THR | 210 | H | -11.484735 | 16.927258 | -12.406971 | -4.736619 |
| 1HDR | A | PHE | 211 | H | -12.478715 | 18.009809 | -13.571009 | -5.041077 |
| 1HDR | A | HIS | 212 | H | -13.225798 | 15.844536 | -16.501525 | -5.692737 |
| 1HDR | A | ASP | 213 | H | -13.105034 | 15.623752 | -16.608811 | -5.709324 |
| 1HDR | A | TRP | 214 | H | -11.494369 | 14.362218 | -14.095901 | -5.286463 |
| 1HDR | A | ILE | 215 | H | -7.548454  | 7.148477  | -11.984462 | -4.696059 |
| 1HDR | A | THR | 216 | H | -7.470549  | 7.006995  | -12.292961 | -4.735804 |
| 1HDR | A | GLY | 217 | T | -7.403677  | 7.032525  | -12.408990 | -4.727379 |
| 1HDR | A | LYS | 218 | T | -7.399340  | 7.036529  | -12.427651 | -4.725393 |
| 1HDR | A | ASN | 219 | T | -7.397631  | 7.036717  | -12.435555 | -4.724178 |
| 1HDR | A | ARG | 220 | T | -8.277004  | 6.695742  | -13.999514 | -4.822008 |
| 1HDR | A | PRO | 221 | C | -8.493838  | 7.483735  | -13.477695 | -4.543178 |
| 1HDR | A | SER | 222 | T | -9.080439  | 8.080726  | -13.766771 | -4.337051 |
| 1HDR | A | SER | 223 | T | -9.152293  | 8.201813  | -13.607200 | -4.325079 |
| 1HDR | A | GLY | 224 | T | -9.197360  | 8.151397  | -13.508813 | -4.308664 |
| 1HDR | A | SER | 225 | T | -9.209042  | 8.131274  | -13.463354 | -4.304176 |
| 1HDR | A | LEU | 226 | E | -10.291900 | 9.283224  | -14.475488 | -4.566619 |
| 1HDR | A | ILE | 227 | E | -11.573308 | 13.368487 | -14.748979 | -4.860429 |
| 1HDR | A | GLN | 228 | E | -11.048895 | 12.929373 | -14.360527 | -5.115657 |
| 1HDR | A | VAL | 229 | E | -7.607342  | 10.706418 | -9.957851  | -4.507911 |
| 1HDR | A | VAL | 230 | E | -6.518761  | 7.911754  | -10.832114 | -4.863210 |
| 1HDR | A | THR | 231 | E | -6.037716  | 6.711218  | -10.996117 | -4.735874 |
| 1HDR | A | THR | 232 | E | -4.417792  | 6.858363  | -8.404020  | -4.769615 |
| 1HDR | A | GLU | 233 | T | -4.407595  | 6.854899  | -8.459071  | -4.772993 |
| 1HDR | A | GLY | 234 | T | -4.407993  | 6.847100  | -8.462389  | -4.774013 |
| 1HDR | A | ARG | 235 | E | -4.421670  | 6.838345  | -8.404321  | -4.770620 |
| 1HDR | A | THR | 236 | E | -4.443621  | 6.879283  | -8.301269  | -4.775627 |
| 1HDR | A | GLU | 237 | E | -6.666805  | 7.385297  | -11.564703 | -4.946788 |
| 1HDR | A | LEU | 238 | E | -6.428739  | 14.004201 | -7.803859  | -5.072258 |
| 1HDR | A | THR | 239 | E | -5.856553  | 12.405547 | -7.348022  | -4.540987 |
| 1HDR | A | PRO | 240 | E | -4.365078  | 10.703976 | -4.619789  | -3.427468 |
| 1HDR | A | ALA | 241 | E | -4.365078  | 10.703976 | -4.619789  | -3.427468 |
| 1HDR | A | TYR | 242 | C | -4.365078  | 10.703976 | -4.619789  | -3.427468 |
| 1HDR | A | PHE | 243 | C | -4.365078  | 10.703976 | -4.619789  | -3.427468 |
| 1HMT | A | VAL | 1   | C | -7.810381  | 11.702841 | -8.876253  | -3.638721 |
| 1HMT | A | ASP | 2   | G | -7.810381  | 11.702841 | -8.876253  | -3.638721 |
| 1HMT | A | ALA | 3   | G | -7.810381  | 11.702841 | -8.876253  | -3.638721 |
| 1HMT | A | PHE | 4   | G | -7.810381  | 11.702841 | -8.876253  | -3.638721 |
| 1HMT | A | LEU | 5   | C | -8.909588  | 13.902863 | -10.424736 | -4.640323 |
| 1HMT | A | GLY | 6   | E | -10.287301 | 14.051318 | -13.169206 | -5.461479 |
| 1HMT | A | THR | 7   | E | -11.331822 | 16.302858 | -14.561673 | -6.108708 |
| 1HMT | A | TRP | 8   | E | -11.902229 | 15.967909 | -14.742319 | -5.429115 |
| 1HMT | A | LYS | 9   | E | -10.400776 | 9.966288  | -14.960638 | -5.156119 |
| 1HMT | A | LEU | 10  | E | -8.406570  | 8.350787  | -12.461832 | -4.677655 |
| 1HMT | A | VAL | 11  | E | -7.978271  | 7.038715  | -13.175710 | -4.746162 |
| 1HMT | A | ASP | 12  | E | -7.976397  | 7.039203  | -13.189029 | -4.748322 |
| 1HMT | A | SER | 13  | E | -7.975716  | 7.040837  | -13.194610 | -4.749466 |
| 1HMT | A | LYS | 14  | E | -7.980661  | 7.020348  | -13.188749 | -4.749909 |
| 1HMT | A | ASN | 15  | T | -8.357013  | 5.895442  | -13.914925 | -4.830248 |
| 1HMT | A | PHE | 16  | H | -10.572262 | 9.382226  | -16.588906 | -5.602356 |
| 1HMT | A | ASP | 17  | H | -10.770540 | 9.778541  | -16.480072 | -5.690087 |
| 1HMT | A | ASP | 18  | H | -10.849824 | 10.002514 | -16.251364 | -5.689193 |
| 1HMT | A | TYR | 19  | H | -12.186448 | 15.549882 | -16.182557 | -6.061183 |
| 1HMT | A | MET | 20  | H | -9.502013  | 11.370520 | -13.193588 | -5.452188 |
| 1HMT | A | LYS | 21  | H | -8.006283  | 10.133547 | -11.528773 | -4.979501 |
| 1HMT | A | SER | 22  | H | -6.884000  | 8.980148  | -10.590250 | -4.823785 |
| 1HMT | A | LEU | 23  | H | -6.646076  | 8.962481  | -10.672290 | -4.825361 |
| 1HMT | A | GLY | 24  | C | -5.875892  | 6.274663  | -10.660431 | -4.552896 |
| 1HMT | A | VAL | 25  | C | -5.757810  | 6.538314  | -10.554166 | -4.513159 |
| 1HMT | A | GLY | 26  | C | -5.761332  | 6.495856  | -10.562595 | -4.509119 |
| 1HMT | A | PHE | 27  | H | -5.840963  | 6.170136  | -10.587984 | -4.467483 |
| 1HMT | A | ALA | 28  | H | -5.893307  | 5.916480  | -10.566298 | -4.434155 |
| 1HMT | A | THR | 29  | H | -6.712479  | 7.856038  | -10.300563 | -4.385316 |
| 1HMT | A | ARG | 30  | H | -8.166147  | 8.786276  | -12.416552 | -4.830005 |
| 1HMT | A | GLN | 31  | H | -8.559870  | 7.274973  | -12.880213 | -4.023747 |
| 1HMT | A | VAL | 32  | H | -7.698997  | 7.083355  | -11.372644 | -3.801102 |
| 1HMT | A | ALA | 33  | H | -6.834373  | 7.070617  | -10.643555 | -4.007644 |
| 1HMT | A | SER | 34  | H | -6.677145  | 7.283297  | -10.687352 | -4.058976 |
| 1HMT | A | MET | 35  | H | -6.633299  | 7.468060  | -10.731962 | -4.105741 |
| 1HMT | A | THR | 36  | C | -6.648433  | 7.521819  | -10.679720 | -4.119914 |
| 1HMT | A | LYS | 37  | C | -6.736212  | 7.582294  | -10.624389 | -4.173730 |
| 1HMT | A | PRO | 38  | C | -7.362091  | 8.529015  | -10.982607 | -4.363201 |

|      |   |     |     |   |            |           |            |           |
|------|---|-----|-----|---|------------|-----------|------------|-----------|
| 1HMT | A | THR | 39  | E | -8.162994  | 10.078135 | -11.397786 | -4.741485 |
| 1HMT | A | THR | 40  | E | -9.850633  | 13.520920 | -12.816123 | -5.191169 |
| 1HMT | A | ILE | 41  | E | -9.947911  | 12.894575 | -13.258347 | -5.072863 |
| 1HMT | A | ILE | 42  | E | -7.209464  | 8.933116  | -10.860109 | -4.942776 |
| 1HMT | A | GLU | 43  | E | -6.020086  | 5.142110  | -11.847603 | -5.113807 |
| 1HMT | A | LYS | 44  | E | -3.651203  | 5.308977  | -7.939758  | -4.714281 |
| 1HMT | A | ASN | 45  | E | -3.607623  | 5.487923  | -7.960626  | -4.697443 |
| 1HMT | A | GLY | 46  | T | -3.607307  | 5.490322  | -7.962403  | -4.697546 |
| 1HMT | A | ASP | 47  | T | -3.608660  | 5.482464  | -7.955744  | -4.696940 |
| 1HMT | A | ILE | 48  | E | -3.617524  | 5.496092  | -7.894246  | -4.689944 |
| 1HMT | A | LEU | 49  | E | -5.173401  | 7.827333  | -8.224774  | -4.460284 |
| 1HMT | A | THR | 50  | E | -8.057623  | 10.055376 | -11.332908 | -4.879227 |
| 1HMT | A | LEU | 51  | E | -11.083189 | 15.351328 | -13.677706 | -5.339941 |
| 1HMT | A | LYS | 52  | E | -10.750911 | 11.072224 | -16.000517 | -5.847075 |
| 1HMT | A | THR | 53  | E | -9.528519  | 12.445967 | -13.008709 | -5.413723 |
| 1HMT | A | HIS | 54  | E | -8.627517  | 12.002349 | -11.964767 | -5.272092 |
| 1HMT | A | SER | 55  | T | -6.349845  | 10.790984 | -9.050548  | -5.110141 |
| 1HMT | A | THR | 56  | T | -6.309546  | 10.797659 | -9.180518  | -5.112749 |
| 1HMT | A | PHE | 57  | T | -6.301822  | 10.827200 | -9.211808  | -5.119815 |
| 1HMT | A | LYS | 58  | T | -6.292531  | 10.829290 | -9.252986  | -5.123383 |
| 1HMT | A | ASN | 59  | E | -6.149663  | 10.737598 | -9.336726  | -5.075149 |
| 1HMT | A | THR | 60  | E | -6.851935  | 10.734962 | -10.144043 | -5.000185 |
| 1HMT | A | GLU | 61  | E | -6.951557  | 10.776556 | -9.969093  | -4.972357 |
| 1HMT | A | ILE | 62  | E | -6.975577  | 10.688270 | -9.894561  | -4.943156 |
| 1HMT | A | SER | 63  | E | -7.002885  | 10.736709 | -9.759936  | -4.915007 |
| 1HMT | A | PHE | 64  | E | -7.874515  | 14.372304 | -8.996626  | -4.581934 |
| 1HMT | A | LYS | 65  | E | -4.690063  | 10.121521 | -6.430056  | -4.502692 |
| 1HMT | A | LEU | 66  | T | -4.681155  | 10.161805 | -6.458739  | -4.504789 |
| 1HMT | A | GLY | 67  | T | -4.659322  | 10.153828 | -6.565244  | -4.516640 |
| 1HMT | A | VAL | 68  | T | -4.659367  | 10.152422 | -6.565737  | -4.516762 |
| 1HMT | A | GLU | 69  | C | -4.660811  | 10.141887 | -6.563430  | -4.517951 |
| 1HMT | A | PHE | 70  | E | -6.408374  | 10.834188 | -9.181861  | -4.797944 |
| 1HMT | A | ASP | 71  | E | -6.574344  | 9.999264  | -9.651429  | -4.880589 |
| 1HMT | A | GLU | 72  | E | -8.025307  | 10.671326 | -12.491967 | -5.450419 |
| 1HMT | A | THR | 73  | E | -7.167412  | 8.415214  | -12.024235 | -5.247161 |
| 1HMT | A | THR | 74  | T | -7.211540  | 8.065469  | -12.080062 | -5.223298 |
| 1HMT | A | ALA | 75  | T | -7.216423  | 8.030404  | -12.069078 | -5.220539 |
| 1HMT | A | ASP | 76  | T | -7.304473  | 7.843023  | -11.951369 | -5.195793 |
| 1HMT | A | ASP | 77  | T | -7.309777  | 7.821945  | -11.926307 | -5.192029 |
| 1HMT | A | ARG | 78  | C | -10.367292 | 9.334924  | -15.884369 | -5.616665 |
| 1HMT | A | LYS | 79  | E | -11.479538 | 9.352263  | -17.403178 | -5.204424 |
| 1HMT | A | VAL | 80  | E | -11.272088 | 11.597472 | -15.036761 | -4.576126 |
| 1HMT | A | LYS | 81  | E | -11.076537 | 12.055206 | -14.515949 | -4.493662 |
| 1HMT | A | SER | 82  | E | -10.273571 | 12.840190 | -12.281444 | -4.072359 |
| 1HMT | A | ILE | 83  | E | -8.901544  | 13.153187 | -10.371417 | -4.166097 |
| 1HMT | A | VAL | 84  | E | -6.511942  | 9.503977  | -8.534069  | -4.027692 |
| 1HMT | A | THR | 85  | E | -3.956493  | 5.907148  | -7.524254  | -4.347360 |
| 1HMT | A | LEU | 86  | E | -2.478186  | 6.388839  | -5.956040  | -4.637656 |
| 1HMT | A | ASP | 87  | E | -2.462239  | 6.480806  | -5.989673  | -4.647894 |
| 1HMT | A | GLY | 88  | T | -2.462088  | 6.482087  | -5.990586  | -4.647957 |
| 1HMT | A | GLY | 89  | T | -2.462734  | 6.478650  | -5.987649  | -4.648481 |
| 1HMT | A | LYS | 90  | E | -2.513157  | 6.517345  | -5.837666  | -4.663096 |
| 1HMT | A | LEU | 91  | E | -4.623944  | 9.678367  | -7.068248  | -4.882041 |
| 1HMT | A | VAL | 92  | E | -7.344882  | 11.463061 | -9.460241  | -4.719052 |
| 1HMT | A | HIS | 93  | E | -11.198906 | 18.631199 | -14.616875 | -7.324485 |
| 1HMT | A | LEU | 94  | E | -12.844289 | 20.163695 | -16.812053 | -7.913287 |
| 1HMT | A | GLN | 95  | E | -11.008587 | 10.746008 | -16.557729 | -6.298856 |
| 1HMT | A | LYS | 96  | E | -7.310432  | 8.373778  | -12.165981 | -5.607104 |
| 1HMT | A | TRP | 97  | E | -6.106893  | 8.038663  | -10.916158 | -5.513919 |
| 1HMT | A | ASP | 98  | T | -5.871015  | 7.353852  | -11.316615 | -5.473108 |
| 1HMT | A | GLY | 99  | T | -5.867245  | 7.359388  | -11.333344 | -5.472747 |
| 1HMT | A | GLN | 100 | E | -5.867339  | 7.358873  | -11.332522 | -5.472607 |
| 1HMT | A | GLU | 101 | E | -5.921475  | 7.262408  | -11.253647 | -5.459777 |
| 1HMT | A | THR | 102 | E | -6.519243  | 5.997638  | -12.170041 | -5.389714 |
| 1HMT | A | THR | 103 | E | -8.859192  | 8.274561  | -13.965021 | -5.411461 |
| 1HMT | A | LEU | 104 | E | -11.529773 | 12.954055 | -14.984603 | -5.028824 |
| 1HMT | A | VAL | 105 | E | -11.205367 | 14.482319 | -13.794451 | -4.959058 |
| 1HMT | A | ARG | 106 | E | -9.347012  | 13.538753 | -11.586286 | -5.147811 |
| 1HMT | A | GLU | 107 | E | -4.450486  | 7.769013  | -7.191628  | -4.403611 |
| 1HMT | A | LEU | 108 | E | -2.707404  | 7.264629  | -5.384345  | -4.386881 |
| 1HMT | A | ILE | 109 | E | -2.690905  | 7.320242  | -5.437147  | -4.394701 |
| 1HMT | A | ASP | 110 | T | -2.690796  | 7.320978  | -5.438064  | -4.394811 |
| 1HMT | A | GLY | 111 | T | -2.690804  | 7.320899  | -5.437987  | -4.394801 |
| 1HMT | A | LYS | 112 | E | -2.722650  | 7.288186  | -5.335318  | -4.389476 |
| 1HMT | A | LEU | 113 | E | -4.829087  | 9.154441  | -7.217590  | -4.583799 |
| 1HMT | A | ILE | 114 | E | -7.799583  | 11.236805 | -10.373927 | -4.911944 |
| 1HMT | A | LEU | 115 | E | -10.804900 | 15.894200 | -13.260360 | -5.246548 |
| 1HMT | A | THR | 116 | E | -10.401249 | 12.732450 | -14.153637 | -5.255933 |
| 1HMT | A | LEU | 117 | E | -8.078157  | 8.929615  | -11.780429 | -4.748003 |
| 1HMT | A | THR | 118 | E | -6.018458  | 6.532280  | -10.215066 | -4.566947 |
| 1HMT | A | HIS | 119 | E | -5.100728  | 6.166232  | -9.296056  | -4.397986 |

|      |   |     |     |   |            |           |            |           |
|------|---|-----|-----|---|------------|-----------|------------|-----------|
| 1HMT | A | GLY | 120 | T | -4.497145  | 5.438428  | -8.878541  | -4.202100 |
| 1HMT | A | THR | 121 | T | -4.483423  | 5.497223  | -8.898372  | -4.201506 |
| 1HMT | A | ALA | 122 | E | -4.484773  | 5.489531  | -8.891883  | -4.200266 |
| 1HMT | A | VAL | 123 | E | -4.529603  | 5.413167  | -8.791160  | -4.171589 |
| 1HMT | A | CYS | 124 | E | -4.741381  | 5.130693  | -8.678564  | -4.092874 |
| 1HMT | A | THR | 125 | E | -6.720784  | 8.007131  | -9.743934  | -4.173758 |
| 1HMT | A | ARG | 126 | E | -11.767835 | 12.976795 | -15.625093 | -5.434518 |
| 1HMT | A | THR | 127 | E | -11.381122 | 15.215318 | -14.431509 | -5.725766 |
| 1HMT | A | TYR | 128 | E | -9.776021  | 13.871359 | -11.889635 | -5.009088 |
| 1HMT | A | GLU | 129 | E | -9.776021  | 13.871359 | -11.889635 | -5.009088 |
| 1HMT | A | LYS | 130 | E | -9.776021  | 13.871359 | -11.889635 | -5.009088 |
| 1HMT | A | GLU | 131 | C | -9.776021  | 13.871359 | -11.889635 | -5.009088 |
| 1HNA | A | PRO | 1   | C | -9.816064  | 12.588382 | -12.238731 | -4.552501 |
| 1HNA | A | MET | 2   | E | -9.816064  | 12.588382 | -12.238731 | -4.552501 |
| 1HNA | A | THR | 3   | E | -9.816064  | 12.588382 | -12.238731 | -4.552501 |
| 1HNA | A | LEU | 4   | E | -9.816064  | 12.588382 | -12.238731 | -4.552501 |
| 1HNA | A | GLY | 5   | E | -10.784322 | 13.379247 | -13.836936 | -5.362686 |
| 1HNA | A | TYR | 6   | E | -12.884104 | 18.753492 | -14.586086 | -6.055055 |
| 1HNA | A | TRP | 7   | E | -12.863008 | 18.681863 | -14.708820 | -6.074447 |
| 1HNA | A | ASN | 8   | C | -12.721475 | 17.834584 | -15.390602 | -6.120217 |
| 1HNA | A | ILE | 9   | C | -12.290238 | 16.162058 | -15.454064 | -5.719543 |
| 1HNA | A | ARG | 10  | T | -12.487663 | 14.658193 | -16.183121 | -5.573632 |
| 1HNA | A | GLY | 11  | T | -11.675094 | 13.936916 | -15.520691 | -5.622077 |
| 1HNA | A | LEU | 12  | T | -11.410974 | 15.091388 | -14.717799 | -5.529342 |
| 1HNA | A | ALA | 13  | H | -11.424450 | 15.101940 | -14.644848 | -5.511359 |
| 1HNA | A | HIS | 14  | H | -11.499971 | 15.171468 | -14.527666 | -5.534107 |
| 1HNA | A | SER | 15  | H | -11.511787 | 15.192513 | -14.460347 | -5.526933 |
| 1HNA | A | ILE | 16  | H | -12.000510 | 17.188719 | -13.384501 | -5.379131 |
| 1HNA | A | ARG | 17  | H | -14.473863 | 19.696527 | -15.872140 | -5.363569 |
| 1HNA | A | LEU | 18  | H | -13.405643 | 21.878658 | -13.111676 | -5.436275 |
| 1HNA | A | LEU | 19  | H | -12.449146 | 20.436320 | -13.024115 | -5.683173 |
| 1HNA | A | LEU | 20  | H | -11.520652 | 17.000270 | -13.927821 | -5.877340 |
| 1HNA | A | GLU | 21  | H | -11.173810 | 15.577010 | -14.657958 | -5.980120 |
| 1HNA | A | TYR | 22  | H | -10.004031 | 11.948271 | -13.983857 | -5.428133 |
| 1HNA | A | THR | 23  | H | -9.842968  | 11.806582 | -14.173097 | -5.436893 |
| 1HNA | A | ASP | 24  | C | -9.813478  | 11.639101 | -14.305914 | -5.428555 |
| 1HNA | A | SER | 25  | C | -9.817403  | 11.449386 | -14.382831 | -5.415099 |
| 1HNA | A | SER | 26  | C | -9.839836  | 11.347802 | -14.350806 | -5.386732 |
| 1HNA | A | TYR | 27  | E | -10.462636 | 11.332243 | -15.267185 | -5.483445 |
| 1HNA | A | GLU | 28  | E | -11.139478 | 11.100798 | -16.384627 | -5.532294 |
| 1HNA | A | GLU | 29  | E | -11.601824 | 12.111216 | -16.525676 | -5.760821 |
| 1HNA | A | LYS | 30  | E | -12.479616 | 12.878966 | -17.753779 | -6.098962 |
| 1HNA | A | LYS | 31  | E | -13.161838 | 13.679160 | -19.094750 | -6.653309 |
| 1HNA | A | TYR | 32  | E | -11.316844 | 13.626923 | -15.504994 | -6.197803 |
| 1HNA | A | THR | 33  | C | -7.865180  | 9.027174  | -12.265812 | -5.344129 |
| 1HNA | A | MET | 34  | C | -6.284372  | 8.221599  | -10.232475 | -4.884715 |
| 1HNA | A | GLY | 35  | C | -3.826335  | 3.279071  | -8.479683  | -4.054586 |
| 1HNA | A | ASP | 36  | C | -3.766955  | 3.624033  | -8.482941  | -4.075223 |
| 1HNA | A | ALA | 37  | T | -3.758552  | 3.672755  | -8.504662  | -4.079720 |
| 1HNA | A | PRO | 38  | T | -3.759025  | 3.668699  | -8.501626  | -4.078596 |
| 1HNA | A | ASP | 39  | T | -3.766871  | 3.608648  | -8.480195  | -4.068120 |
| 1HNA | A | TYR | 40  | T | -5.077473  | 6.916315  | -8.690300  | -4.275265 |
| 1HNA | A | ASP | 41  | C | -6.278501  | 7.112890  | -10.025162 | -4.385709 |
| 1HNA | A | ARG | 42  | H | -8.863542  | 10.253797 | -12.211560 | -4.765810 |
| 1HNA | A | SER | 43  | H | -11.405978 | 12.160212 | -15.913488 | -5.462666 |
| 1HNA | A | GLN | 44  | H | -12.520193 | 13.086616 | -17.618094 | -5.827460 |
| 1HNA | A | TRP | 45  | H | -11.644043 | 15.080970 | -15.192021 | -5.908716 |
| 1HNA | A | LEU | 46  | H | -9.835462  | 12.169427 | -13.839732 | -5.671097 |
| 1HNA | A | ASN | 47  | H | -8.246607  | 9.684051  | -12.524488 | -5.269042 |
| 1HNA | A | GLU | 48  | T | -8.115464  | 10.018880 | -12.532812 | -5.260744 |
| 1HNA | A | LYS | 49  | T | -6.634377  | 9.953123  | -9.854472  | -4.877125 |
| 1HNA | A | PHE | 50  | T | -5.966313  | 11.146646 | -8.512462  | -4.759451 |
| 1HNA | A | LYS | 51  | T | -5.486181  | 10.670742 | -8.277990  | -4.710644 |
| 1HNA | A | LEU | 52  | T | -5.269353  | 10.492556 | -8.286704  | -4.699802 |
| 1HNA | A | GLY | 53  | T | -4.295328  | 9.307937  | -6.906635  | -4.446881 |
| 1HNA | A | LEU | 54  | T | -4.297475  | 9.310533  | -6.891654  | -4.441567 |
| 1HNA | A | ASP | 55  | T | -4.317579  | 9.219422  | -6.869436  | -4.430824 |
| 1HNA | A | PHE | 56  | T | -4.365032  | 9.130937  | -6.767248  | -4.410037 |
| 1HNA | A | PRO | 57  | T | -4.406757  | 9.061254  | -6.648607  | -4.389566 |
| 1HNA | A | ASN | 58  | T | -6.566208  | 10.501930 | -9.336614  | -4.541432 |
| 1HNA | A | LEU | 59  | T | -7.190385  | 10.883572 | -9.490711  | -4.486510 |
| 1HNA | A | PRO | 60  | T | -8.857605  | 13.898433 | -9.671602  | -4.299041 |
| 1HNA | A | TYR | 61  | E | -11.370277 | 17.718307 | -12.483345 | -4.973798 |
| 1HNA | A | LEU | 62  | E | -7.082014  | 9.677767  | -9.986077  | -4.639316 |
| 1HNA | A | ILE | 63  | E | -4.749649  | 6.443065  | -8.612369  | -4.528034 |
| 1HNA | A | ASP | 64  | E | -4.469155  | 6.415730  | -8.911380  | -4.657013 |
| 1HNA | A | GLY | 65  | T | -4.317842  | 6.692731  | -8.773879  | -4.592453 |
| 1HNA | A | THR | 66  | T | -4.313557  | 6.726181  | -8.776883  | -4.592041 |
| 1HNA | A | HIS | 67  | E | -4.319102  | 6.698492  | -8.765559  | -4.591561 |
| 1HNA | A | LYS | 68  | E | -4.700185  | 6.982984  | -8.923009  | -4.647972 |
| 1HNA | A | ILE | 69  | E | -5.182273  | 7.754795  | -8.321286  | -4.371060 |

|      |   |     |     |   |            |           |            |           |
|------|---|-----|-----|---|------------|-----------|------------|-----------|
| 1HNA | A | THR | 70  | E | -7.226512  | 11.338570 | -9.263340  | -4.544360 |
| 1HNA | A | GLN | 71  | C | -9.562009  | 12.010161 | -14.048324 | -5.389919 |
| 1HNA | A | SER | 72  | H | -9.720087  | 12.089448 | -14.243303 | -5.474230 |
| 1HNA | A | ASN | 73  | H | -9.830935  | 11.702601 | -14.392172 | -5.487102 |
| 1HNA | A | ALA | 74  | H | -9.896557  | 11.507047 | -14.377000 | -5.475423 |
| 1HNA | A | ILE | 75  | H | -10.567074 | 13.276666 | -13.866235 | -5.237867 |
| 1HNA | A | LEU | 76  | H | -11.149984 | 15.460891 | -12.943432 | -5.203604 |
| 1HNA | A | ARG | 77  | H | -13.955015 | 15.995896 | -17.133078 | -5.333077 |
| 1HNA | A | TYR | 78  | H | -12.634821 | 14.151057 | -15.287546 | -4.909743 |
| 1HNA | A | ILE | 79  | H | -10.295776 | 11.888169 | -13.146357 | -4.724102 |
| 1HNA | A | ALA | 80  | H | -8.678049  | 7.727796  | -13.297391 | -4.665331 |
| 1HNA | A | ARG | 81  | H | -8.336151  | 8.345957  | -13.059639 | -4.736919 |
| 1HNA | A | LYS | 82  | H | -8.234167  | 8.578081  | -13.127291 | -4.805377 |
| 1HNA | A | HIS | 83  | C | -7.910915  | 9.060377  | -12.800365 | -4.951804 |
| 1HNA | A | ASN | 84  | C | -7.677173  | 8.824781  | -12.826007 | -5.023409 |
| 1HNA | A | LEU | 85  | C | -7.726052  | 9.087400  | -12.824730 | -5.106358 |
| 1HNA | A | CYS | 86  | C | -7.064054  | 6.522489  | -13.088140 | -5.233693 |
| 1HNA | A | GLY | 87  | C | -5.387383  | 5.217288  | -10.749347 | -4.945691 |
| 1HNA | A | GLU | 88  | C | -5.248702  | 5.355213  | -10.811695 | -4.931306 |
| 1HNA | A | SER | 89  | C | -5.249413  | 5.343868  | -10.812445 | -4.929819 |
| 1HNA | A | GLU | 90  | H | -5.246568  | 5.349382  | -10.823383 | -4.929439 |
| 1HNA | A | LYS | 91  | H | -5.266878  | 5.342407  | -10.741004 | -4.917781 |
| 1HNA | A | GLU | 92  | H | -6.134807  | 6.008673  | -11.186312 | -4.883106 |
| 1HNA | A | GLN | 93  | H | -7.933322  | 6.933072  | -13.400356 | -4.909023 |
| 1HNA | A | ILE | 94  | H | -8.245078  | 7.070783  | -13.246909 | -4.929157 |
| 1HNA | A | ARG | 95  | H | -12.423710 | 10.196600 | -19.577506 | -6.380301 |
| 1HNA | A | GLU | 96  | H | -13.699517 | 11.400409 | -21.500209 | -6.815805 |
| 1HNA | A | ASP | 97  | H | -11.724271 | 10.033555 | -16.507984 | -5.125081 |
| 1HNA | A | ILE | 98  | H | -11.163412 | 10.607917 | -15.930916 | -5.129722 |
| 1HNA | A | LEU | 99  | H | -11.163013 | 10.649125 | -15.914958 | -5.132925 |
| 1HNA | A | GLU | 100 | H | -11.163578 | 10.647122 | -15.911862 | -5.132748 |
| 1HNA | A | ASN | 101 | H | -11.129828 | 10.734029 | -15.992481 | -5.164041 |
| 1HNA | A | GLN | 102 | H | -11.391644 | 11.133051 | -15.760760 | -5.190326 |
| 1HNA | A | PHE | 103 | H | -12.761637 | 12.611130 | -17.455316 | -5.708226 |
| 1HNA | A | MET | 104 | H | -12.805686 | 12.233100 | -17.581965 | -5.717862 |
| 1HNA | A | ASP | 105 | H | -12.800729 | 12.197227 | -17.623078 | -5.718731 |
| 1HNA | A | SER | 106 | H | -14.511798 | 11.738635 | -21.103154 | -6.017137 |
| 1HNA | A | ARG | 107 | H | -14.570012 | 11.592126 | -21.137850 | -5.956897 |
| 1HNA | A | MET | 108 | H | -11.899749 | 12.546402 | -15.299147 | -5.074797 |
| 1HNA | A | GLN | 109 | H | -11.701622 | 13.343494 | -15.000514 | -5.039371 |
| 1HNA | A | LEU | 110 | H | -10.802919 | 14.165584 | -13.112086 | -4.785530 |
| 1HNA | A | ALA | 111 | H | -10.530830 | 14.453204 | -12.967929 | -4.818829 |
| 1HNA | A | LYS | 112 | H | -10.448590 | 14.524748 | -13.076095 | -4.866453 |
| 1HNA | A | LEU | 113 | H | -10.395439 | 14.541481 | -13.020167 | -4.841557 |
| 1HNA | A | CYS | 114 | T | -9.146402  | 10.010718 | -13.200698 | -4.894852 |
| 1HNA | A | TYR | 115 | T | -9.020230  | 10.780941 | -12.947679 | -4.938973 |
| 1HNA | A | ASP | 116 | T | -6.814192  | 9.781538  | -9.457482  | -4.451932 |
| 1HNA | A | PRO | 117 | T | -5.428286  | 8.986870  | -7.926334  | -4.217979 |
| 1HNA | A | ASP | 118 | T | -5.358620  | 9.154854  | -8.026811  | -4.249525 |
| 1HNA | A | PHE | 119 | H | -5.317446  | 9.492696  | -7.979100  | -4.275470 |
| 1HNA | A | GLU | 120 | H | -5.055153  | 9.560457  | -7.909847  | -4.301724 |
| 1HNA | A | LYS | 121 | H | -5.077187  | 9.554262  | -7.872393  | -4.299788 |
| 1HNA | A | LEU | 122 | H | -5.487488  | 10.203788 | -7.980273  | -4.405667 |
| 1HNA | A | LYS | 123 | H | -5.575410  | 10.156156 | -7.843917  | -4.390222 |
| 1HNA | A | PRO | 124 | H | -5.641695  | 9.690365  | -7.892683  | -4.360543 |
| 1HNA | A | GLU | 125 | H | -7.597235  | 9.876320  | -10.660923 | -4.678939 |
| 1HNA | A | TYR | 126 | H | -11.132986 | 13.428947 | -15.004266 | -5.115752 |
| 1HNA | A | LEU | 127 | H | -10.435792 | 11.328203 | -13.923053 | -4.507331 |
| 1HNA | A | GLN | 128 | H | -9.038568  | 9.253790  | -12.565974 | -4.295531 |
| 1HNA | A | ALA | 129 | H | -8.984865  | 9.485882  | -12.593045 | -4.329890 |
| 1HNA | A | LEU | 130 | H | -8.971891  | 9.637746  | -12.572168 | -4.343121 |
| 1HNA | A | PRO | 131 | H | -8.891333  | 10.148254 | -12.498538 | -4.402726 |
| 1HNA | A | GLU | 132 | H | -8.810549  | 10.400394 | -12.524072 | -4.514706 |
| 1HNA | A | MET | 133 | H | -9.382769  | 12.575328 | -12.668766 | -4.900688 |
| 1HNA | A | LEU | 134 | H | -9.507538  | 12.721207 | -12.572552 | -4.945946 |
| 1HNA | A | LYS | 135 | H | -9.545057  | 12.503291 | -12.602298 | -4.942708 |
| 1HNA | A | LEU | 136 | H | -9.832760  | 11.779347 | -12.975226 | -5.023619 |
| 1HNA | A | TYR | 137 | H | -12.412790 | 12.969219 | -16.520955 | -5.203944 |
| 1HNA | A | SER | 138 | H | -12.168747 | 11.778353 | -17.046234 | -5.266437 |
| 1HNA | A | GLN | 139 | H | -10.297459 | 8.876985  | -15.076406 | -4.936653 |
| 1HNA | A | PHE | 140 | H | -10.034991 | 9.088061  | -15.204185 | -5.069525 |
| 1HNA | A | LEU | 141 | H | -8.423039  | 6.898376  | -13.395673 | -4.638962 |
| 1HNA | A | GLY | 142 | T | -8.384981  | 7.077248  | -13.453544 | -4.667696 |
| 1HNA | A | LYS | 143 | T | -8.385140  | 7.078936  | -13.451035 | -4.667398 |
| 1HNA | A | GLN | 144 | T | -8.408188  | 7.011251  | -13.389938 | -4.657243 |
| 1HNA | A | PRO | 145 | T | -8.421531  | 6.971516  | -13.336384 | -4.642684 |
| 1HNA | A | TRP | 146 | B | -9.838696  | 12.511791 | -13.270051 | -5.191367 |
| 1HNA | A | PHE | 147 | T | -9.489989  | 15.730743 | -11.332915 | -5.470853 |
| 1HNA | A | LEU | 148 | T | -7.685489  | 12.265567 | -10.224940 | -5.151070 |
| 1HNA | A | GLY | 149 | B | -7.315228  | 11.072642 | -10.779405 | -5.115362 |
| 1HNA | A | ASP | 150 | T | -7.314639  | 11.076147 | -10.781910 | -5.115501 |

|      |   |     |     |   |            |           |            |           |
|------|---|-----|-----|---|------------|-----------|------------|-----------|
| 1HNA | A | LYS | 151 | T | -7.316751  | 11.045531 | -10.783566 | -5.114347 |
| 1HNA | A | ILE | 152 | C | -7.329474  | 10.960776 | -10.768551 | -5.106242 |
| 1HNA | A | THR | 153 | C | -7.767158  | 9.723409  | -11.422887 | -5.074669 |
| 1HNA | A | PHE | 154 | H | -11.100334 | 16.692971 | -12.767117 | -5.202762 |
| 1HNA | A | VAL | 155 | H | -11.816242 | 18.936748 | -12.289222 | -4.931160 |
| 1HNA | A | ASP | 156 | H | -11.860721 | 18.957096 | -12.158555 | -4.911776 |
| 1HNA | A | PHE | 157 | H | -12.760744 | 19.562266 | -13.025716 | -4.788312 |
| 1HNA | A | ILE | 158 | H | -12.953121 | 18.408535 | -13.464806 | -4.607896 |
| 1HNA | A | ALA | 159 | H | -12.946713 | 17.865924 | -13.781098 | -4.629221 |
| 1HNA | A | TYR | 160 | H | -13.835402 | 17.469521 | -16.091889 | -5.217707 |
| 1HNA | A | ASP | 161 | H | -13.861063 | 17.287664 | -16.127807 | -5.219648 |
| 1HNA | A | VAL | 162 | H | -13.877927 | 17.175793 | -16.141201 | -5.217485 |
| 1HNA | A | LEU | 163 | H | -14.140719 | 17.593004 | -15.856608 | -5.241039 |
| 1HNA | A | GLU | 164 | H | -15.682509 | 15.406509 | -21.154297 | -6.269366 |
| 1HNA | A | ARG | 165 | H | -15.637560 | 15.617277 | -21.066174 | -6.338877 |
| 1HNA | A | ASN | 166 | H | -12.795583 | 16.133075 | -15.705913 | -5.975648 |
| 1HNA | A | GLN | 167 | H | -10.739034 | 13.725294 | -13.276820 | -5.110810 |
| 1HNA | A | VAL | 168 | H | -9.557096  | 12.004956 | -11.902243 | -4.358173 |
| 1HNA | A | PHE | 169 | H | -9.436039  | 12.006796 | -12.109949 | -4.403394 |
| 1HNA | A | GLU | 170 | C | -9.288610  | 11.685189 | -12.365727 | -4.410890 |
| 1HNA | A | PRO | 171 | H | -9.201896  | 11.407570 | -12.589921 | -4.423525 |
| 1HNA | A | SER | 172 | H | -9.066182  | 10.750409 | -12.813884 | -4.415019 |
| 1HNA | A | CYS | 173 | H | -9.288551  | 10.529126 | -13.421561 | -4.562019 |
| 1HNA | A | LEU | 174 | H | -9.199933  | 10.789367 | -13.127391 | -4.521055 |
| 1HNA | A | ASP | 175 | H | -9.274420  | 10.641567 | -13.299055 | -4.559839 |
| 1HNA | A | ALA | 176 | H | -9.295084  | 10.983665 | -13.141505 | -4.567674 |
| 1HNA | A | PHE | 177 | C | -9.583623  | 11.984556 | -12.870515 | -4.588177 |
| 1HNA | A | PRO | 178 | H | -9.629413  | 11.403671 | -13.153133 | -4.566766 |
| 1HNA | A | ASN | 179 | H | -10.092959 | 10.436729 | -14.386470 | -4.735005 |
| 1HNA | A | LEU | 180 | H | -10.313542 | 11.539908 | -13.802034 | -4.723299 |
| 1HNA | A | LYS | 181 | H | -11.023084 | 10.017269 | -15.737605 | -5.059822 |
| 1HNA | A | ASP | 182 | H | -11.020173 | 10.027144 | -15.732354 | -5.050650 |
| 1HNA | A | PHE | 183 | H | -12.385582 | 15.411632 | -15.121805 | -5.039563 |
| 1HNA | A | ILE | 184 | H | -12.384782 | 15.443117 | -15.081755 | -5.020152 |
| 1HNA | A | SER | 185 | H | -12.330914 | 12.632872 | -16.480506 | -5.038109 |
| 1HNA | A | ARG | 186 | H | -12.043271 | 13.489115 | -15.897262 | -5.245587 |
| 1HNA | A | PHE | 187 | H | -9.498757  | 12.008507 | -12.696809 | -5.235870 |
| 1HNA | A | GLU | 188 | H | -8.411279  | 8.012307  | -13.666140 | -5.217565 |
| 1HNA | A | GLY | 189 | H | -7.490033  | 9.020073  | -11.424151 | -4.718622 |
| 1HNA | A | LEU | 190 | C | -7.487976  | 9.025266  | -11.433244 | -4.717821 |
| 1HNA | A | GLU | 191 | H | -7.477174  | 9.015151  | -11.477867 | -4.713072 |
| 1HNA | A | LYS | 192 | H | -7.496779  | 8.915118  | -11.438272 | -4.695514 |
| 1HNA | A | ILE | 193 | H | -7.614010  | 9.278924  | -10.910637 | -4.582052 |
| 1HNA | A | SER | 194 | H | -9.725341  | 8.951353  | -14.019283 | -4.495299 |
| 1HNA | A | ALA | 195 | H | -9.782101  | 8.909050  | -14.064714 | -4.551306 |
| 1HNA | A | TYR | 196 | H | -11.078402 | 12.063463 | -15.405904 | -5.293990 |
| 1HNA | A | MET | 197 | H | -8.259411  | 5.471722  | -13.342931 | -4.316171 |
| 1HNA | A | LYS | 198 | H | -8.200389  | 5.710194  | -13.365069 | -4.307479 |
| 1HNA | A | SER | 199 | T | -8.066746  | 6.395220  | -13.050269 | -4.227929 |
| 1HNA | A | SER | 200 | T | -7.727714  | 8.703490  | -11.497189 | -4.108181 |
| 1HNA | A | ARG | 201 | T | -7.727778  | 8.703403  | -11.496392 | -4.107941 |
| 1HNA | A | PHE | 202 | T | -8.034299  | 10.935311 | -10.258041 | -3.972695 |
| 1HNA | A | LEU | 203 | T | -8.076335  | 11.164159 | -10.015489 | -3.954187 |
| 1HNA | A | PRO | 204 | T | -8.213601  | 11.697426 | -9.540300  | -3.962301 |
| 1HNA | A | ARG | 205 | T | -11.307021 | 12.111499 | -14.287194 | -4.354275 |
| 1HNA | A | PRO | 206 | T | -11.321738 | 12.122339 | -14.255450 | -4.356405 |
| 1HNA | A | VAL | 207 | C | -11.394978 | 11.997433 | -14.158133 | -4.333920 |
| 1HNA | A | PHE | 208 | T | -12.911897 | 17.104928 | -15.923329 | -5.644309 |
| 1HNA | A | THR | 209 | T | -11.702243 | 12.855001 | -15.739138 | -5.470827 |
| 1HNA | A | LYS | 210 | T | -11.718906 | 12.726246 | -15.742889 | -5.472060 |
| 1HNA | A | MET | 211 | T | -11.700617 | 12.861853 | -15.808762 | -5.557941 |
| 1HNA | A | ALA | 212 | T | -10.859090 | 13.191782 | -14.339839 | -5.294800 |
| 1HNA | A | VAL | 213 | T | -9.038396  | 11.990664 | -11.406622 | -4.603217 |
| 1HNA | A | PHE | 214 | T | -8.167962  | 10.650284 | -10.676162 | -4.148730 |
| 1HNA | A | GLY | 215 | T | -8.167962  | 10.650284 | -10.676162 | -4.148730 |
| 1HNA | A | ASN | 216 | T | -8.167962  | 10.650284 | -10.676162 | -4.148730 |
| 1HNA | A | LYS | 217 | C | -8.167962  | 10.650284 | -10.676162 | -4.148730 |
| 1HUP | A | ALA | 88  | C | -4.167585  | 2.305957  | -8.441890  | -3.125890 |
| 1HUP | A | ALA | 89  | C | -4.167585  | 2.305957  | -8.441890  | -3.125890 |
| 1HUP | A | SER | 90  | H | -4.167585  | 2.305957  | -8.441890  | -3.125890 |
| 1HUP | A | GLU | 91  | H | -4.167585  | 2.305957  | -8.441890  | -3.125890 |
| 1HUP | A | ARG | 92  | H | -5.617505  | 3.464737  | -11.205754 | -4.000684 |
| 1HUP | A | LYS | 93  | H | -6.468432  | 4.239031  | -13.983953 | -5.170869 |
| 1HUP | A | ALA | 94  | H | -6.783379  | 4.617891  | -14.814440 | -5.625595 |
| 1HUP | A | LEU | 95  | H | -7.076964  | 4.891199  | -15.391480 | -5.878108 |
| 1HUP | A | GLN | 96  | H | -7.311681  | 5.194959  | -15.489646 | -5.877520 |
| 1HUP | A | THR | 97  | H | -7.518811  | 5.544452  | -15.255768 | -5.776755 |
| 1HUP | A | GLU | 98  | H | -8.244598  | 7.574615  | -14.705599 | -5.192724 |
| 1HUP | A | MET | 99  | H | -8.372175  | 8.215465  | -13.871861 | -4.807230 |
| 1HUP | A | ALA | 100 | H | -8.390211  | 8.509002  | -13.345535 | -4.557717 |
| 1HUP | A | ARG | 101 | H | -8.350309  | 8.701481  | -12.996040 | -4.404251 |

|      |   |     |     |   |            |           |             |           |
|------|---|-----|-----|---|------------|-----------|-------------|-----------|
| 1HUP | A | ILE | 102 | H | -8.221937  | 9.088358  | -12.761877  | -4.500710 |
| 1HUP | A | LYS | 103 | H | -8.339505  | 9.599168  | -12.906105  | -4.681020 |
| 1HUP | A | LYS | 104 | H | -8.133642  | 9.472489  | -12.676475  | -4.647329 |
| 1HUP | A | TRP | 105 | H | -8.063542  | 9.357633  | -12.629396  | -4.594934 |
| 1HUP | A | LEU | 106 | H | -7.810580  | 8.866453  | -12.140142  | -4.328886 |
| 1HUP | A | THR | 107 | H | -6.133193  | 7.258338  | -9.737604   | -4.257089 |
| 1HUP | A | PHE | 108 | H | -5.852104  | 7.471895  | -9.708554   | -4.276091 |
| 1HUP | A | SER | 109 | H | -5.850280  | 7.493366  | -9.711116   | -4.281571 |
| 1HUP | A | LEU | 110 | H | -5.851720  | 7.496419  | -9.703405   | -4.282828 |
| 1HUP | A | GLY | 111 | C | -5.821517  | 7.589308  | -9.790118   | -4.345189 |
| 1HUP | A | LYS | 112 | E | -6.168306  | 8.254437  | -10.251062  | -4.615852 |
| 1HUP | A | GLN | 113 | E | -6.485627  | 8.870771  | -11.451761  | -5.343481 |
| 1HUP | A | VAL | 114 | E | -6.497381  | 8.846431  | -11.451530  | -5.354573 |
| 1HUP | A | GLY | 115 | T | -6.500010  | 8.828774  | -11.448696  | -5.356316 |
| 1HUP | A | ASN | 116 | T | -6.632847  | 8.765264  | -11.444771  | -5.401274 |
| 1HUP | A | LYS | 117 | E | -7.013278  | 8.751274  | -11.695011  | -5.586361 |
| 1HUP | A | PHE | 118 | E | -9.199387  | 12.229373 | -12.379141  | -5.396450 |
| 1HUP | A | PHE | 119 | E | -8.714428  | 14.582964 | -10.325571  | -5.266189 |
| 1HUP | A | LEU | 120 | E | -6.099493  | 8.860803  | -9.699005   | -5.029756 |
| 1HUP | A | THR | 121 | E | -4.496979  | 7.750474  | -8.362387   | -5.032301 |
| 1HUP | A | ASN | 122 | E | -4.435129  | 7.789296  | -8.514732   | -5.050757 |
| 1HUP | A | GLY | 123 | E | -4.423457  | 7.811440  | -8.558786   | -5.054893 |
| 1HUP | A | GLU | 124 | E | -4.423873  | 7.806693  | -8.557594   | -5.054745 |
| 1HUP | A | ILE | 125 | E | -4.459565  | 7.745113  | -8.486655   | -5.056143 |
| 1HUP | A | MET | 126 | E | -5.696616  | 8.266771  | -10.038078  | -5.220887 |
| 1HUP | A | THR | 127 | C | -6.754556  | 8.933433  | -10.773119  | -5.256998 |
| 1HUP | A | PHE | 128 | H | -10.037039 | 13.739593 | -13.449805  | -5.209602 |
| 1HUP | A | GLU | 129 | H | -9.385260  | 10.668499 | -13.250519  | -4.745180 |
| 1HUP | A | LYS | 130 | H | -9.360629  | 10.644318 | -13.250582  | -4.709257 |
| 1HUP | A | VAL | 131 | H | -9.386359  | 10.553633 | -13.196518  | -4.668741 |
| 1HUP | A | LYS | 132 | H | -9.454820  | 9.907364  | -13.440984  | -4.625553 |
| 1HUP | A | ALA | 133 | H | -9.180501  | 8.151917  | -13.979416  | -4.410624 |
| 1HUP | A | LEU | 134 | H | -9.247580  | 6.747064  | -14.701316  | -4.307761 |
| 1HUP | A | CYS | 135 | H | -8.362427  | 5.595806  | -13.789396  | -4.227510 |
| 1HUP | A | VAL | 136 | H | -6.312294  | 6.491983  | -9.599707   | -3.715862 |
| 1HUP | A | LYS | 137 | H | -6.305301  | 6.507125  | -9.634961   | -3.720445 |
| 1HUP | A | PHE | 138 | H | -6.306436  | 6.515126  | -9.622545   | -3.719742 |
| 1HUP | A | GLN | 139 | C | -6.307062  | 6.522408  | -9.612157   | -3.717625 |
| 1HUP | A | ALA | 140 | C | -6.320908  | 6.560252  | -9.516976   | -3.705823 |
| 1HUP | A | SER | 141 | E | -8.709856  | 8.954303  | -12.508360  | -4.077105 |
| 1HUP | A | VAL | 142 | E | -9.411776  | 11.593942 | -12.122859  | -3.978244 |
| 1HUP | A | ALA | 143 | C | -9.552493  | 11.695519 | -11.987019  | -3.942176 |
| 1HUP | A | THR | 144 | C | -9.958326  | 12.926584 | -11.934598  | -4.152662 |
| 1HUP | A | PRO | 145 | C | -10.188406 | 11.002054 | -13.614665  | -4.351718 |
| 1HUP | A | ARG | 146 | C | -10.228630 | 8.629559  | -15.380862  | -4.715143 |
| 1HUP | A | ASN | 147 | C | -10.062064 | 8.386907  | -15.667739  | -4.829149 |
| 1HUP | A | ALA | 148 | H | -9.900412  | 7.919070  | -16.020661  | -4.940804 |
| 1HUP | A | ALA | 149 | H | -9.889682  | 7.891879  | -16.067092  | -4.953523 |
| 1HUP | A | GLU | 150 | H | -10.113467 | 7.588887  | -16.732967  | -5.199890 |
| 1HUP | A | ASN | 151 | H | -10.294945 | 7.504780  | -16.920236  | -5.242920 |
| 1HUP | A | GLY | 152 | H | -9.327349  | 9.524963  | -13.572947  | -4.841538 |
| 1HUP | A | ALA | 153 | H | -9.336869  | 10.186280 | -13.163334  | -4.803516 |
| 1HUP | A | ILE | 154 | H | -9.123521  | 11.991824 | -12.297422  | -4.825218 |
| 1HUP | A | GLN | 155 | H | -8.732638  | 11.906872 | -12.079316  | -4.860812 |
| 1HUP | A | ASN | 156 | H | -6.912568  | 12.056204 | -8.905526   | -4.801643 |
| 1HUP | A | LEU | 157 | H | -6.899250  | 12.120894 | -8.926754   | -4.812547 |
| 1HUP | A | ILE | 158 | C | -6.888664  | 12.102517 | -8.981815   | -4.811710 |
| 1HUP | A | LYS | 159 | C | -6.892788  | 12.075627 | -8.971847   | -4.811224 |
| 1HUP | A | GLU | 160 | C | -6.905819  | 12.081535 | -8.907341   | -4.809211 |
| 1HUP | A | GLU | 161 | C | -8.601970  | 12.388911 | -11.474975  | -4.981109 |
| 1HUP | A | ALA | 162 | E | -9.205970  | 11.624291 | -12.043681  | -4.762301 |
| 1HUP | A | PHE | 163 | E | -10.664553 | 18.327430 | -10.922550  | -4.621970 |
| 1HUP | A | LEU | 164 | E | -10.442145 | 17.143580 | -11.329588  | -4.665038 |
| 1HUP | A | GLY | 165 | E | -10.394527 | 16.698838 | -11.1728464 | -4.733539 |
| 1HUP | A | ILE | 166 | E | -9.841322  | 12.882666 | -13.113027  | -4.934568 |
| 1HUP | A | THR | 167 | E | -8.029021  | 7.421147  | -13.204669  | -5.141760 |
| 1HUP | A | ASP | 168 | T | -7.951020  | 7.151332  | -13.547950  | -5.180689 |
| 1HUP | A | GLU | 169 | T | -6.236504  | 4.369555  | -12.634607  | -5.232358 |
| 1HUP | A | LYS | 170 | T | -5.123798  | 4.726104  | -10.925365  | -5.027030 |
| 1HUP | A | THR | 171 | T | -5.121218  | 4.753589  | -10.929715  | -5.029372 |
| 1HUP | A | GLU | 172 | T | -5.125270  | 4.738286  | -10.914146  | -5.028655 |
| 1HUP | A | GLY | 173 | T | -5.125885  | 4.737711  | -10.909042  | -5.028289 |
| 1HUP | A | GLN | 174 | T | -5.218717  | 4.827016  | -10.624906  | -4.992952 |
| 1HUP | A | PHE | 175 | C | -8.263295  | 11.347473 | -12.179484  | -5.623664 |
| 1HUP | A | VAL | 176 | B | -8.188436  | 8.258918  | -12.886118  | -4.993411 |
| 1HUP | A | ASP | 177 | T | -5.589776  | 5.800095  | -10.547783  | -4.941184 |
| 1HUP | A | LEU | 178 | T | -3.831133  | 7.331841  | -7.035042   | -4.517779 |
| 1HUP | A | THR | 179 | T | -3.734054  | 7.538034  | -7.088327   | -4.506219 |
| 1HUP | A | GLY | 180 | T | -3.581109  | 7.632793  | -7.079411   | -4.451240 |
| 1HUP | A | ASN | 181 | C | -3.580867  | 7.636262  | -7.079104   | -4.451100 |
| 1HUP | A | ARG | 182 | B | -3.584595  | 7.853807  | -6.928425   | -4.428806 |

|      |   |     |     |   |            |           |            |           |
|------|---|-----|-----|---|------------|-----------|------------|-----------|
| 1HUP | A | LEU | 183 | T | -4.164305  | 8.595538  | -7.062766  | -4.310295 |
| 1HUP | A | THR | 184 | T | -4.385399  | 8.559540  | -6.923175  | -4.255431 |
| 1HUP | A | TYR | 185 | T | -5.647279  | 13.232453 | -6.173227  | -4.304219 |
| 1HUP | A | THR | 186 | T | -5.662486  | 13.264222 | -6.090020  | -4.300682 |
| 1HUP | A | ASN | 187 | C | -7.071117  | 12.810367 | -8.869054  | -4.870021 |
| 1HUP | A | TRP | 188 | B | -8.511019  | 13.686402 | -11.636796 | -5.477269 |
| 1HUP | A | ASN | 189 | T | -6.881465  | 6.689224  | -12.324496 | -5.349718 |
| 1HUP | A | GLU | 190 | T | -6.363288  | 6.065216  | -12.240880 | -5.195427 |
| 1HUP | A | GLY | 191 | T | -6.351008  | 6.079320  | -12.282669 | -5.199434 |
| 1HUP | A | GLU | 192 | T | -6.351345  | 6.076129  | -12.280812 | -5.198432 |
| 1HUP | A | PRO | 193 | T | -6.283527  | 6.008179  | -12.353414 | -5.158866 |
| 1HUP | A | ASN | 194 | T | -6.325903  | 4.915667  | -12.746172 | -4.976925 |
| 1HUP | A | ASN | 195 | C | -6.013868  | 3.569134  | -12.391374 | -4.610666 |
| 1HUP | A | ALA | 196 | G | -5.738726  | 3.899801  | -12.048761 | -4.561791 |
| 1HUP | A | GLY | 197 | G | -5.737008  | 3.904593  | -12.057774 | -4.563136 |
| 1HUP | A | SER | 198 | G | -5.764698  | 3.817109  | -12.011640 | -4.547023 |
| 1HUP | A | ASP | 199 | C | -5.839788  | 3.906165  | -11.806385 | -4.515086 |
| 1HUP | A | GLU | 200 | C | -6.307913  | 4.527945  | -11.557655 | -4.503171 |
| 1HUP | A | ASP | 201 | C | -9.145251  | 5.802774  | -15.258324 | -5.035894 |
| 1HUP | A | CYS | 202 | E | -11.438909 | 12.949755 | -15.110441 | -4.834167 |
| 1HUP | A | VAL | 203 | E | -11.547230 | 14.854616 | -13.937004 | -4.674713 |
| 1HUP | A | LEU | 204 | E | -11.453455 | 14.786209 | -14.083179 | -4.767080 |
| 1HUP | A | LEU | 205 | E | -10.628483 | 11.184786 | -15.317989 | -5.345691 |
| 1HUP | A | LEU | 206 | T | -10.451459 | 9.733511  | -16.308982 | -5.587224 |
| 1HUP | A | LYS | 207 | T | -10.488596 | 9.292593  | -16.583035 | -5.671440 |
| 1HUP | A | ASN | 208 | T | -10.494106 | 9.218198  | -16.619363 | -5.686358 |
| 1HUP | A | GLY | 209 | T | -10.516464 | 9.062879  | -16.649504 | -5.701293 |
| 1HUP | A | GLN | 210 | C | -11.100013 | 7.464466  | -18.176467 | -5.979972 |
| 1HUP | A | TRP | 211 | E | -12.925071 | 12.724218 | -18.424875 | -5.967960 |
| 1HUP | A | ASN | 212 | E | -12.489812 | 11.574850 | -17.412457 | -5.352502 |
| 1HUP | A | ASP | 213 | E | -11.635385 | 9.528826  | -16.522760 | -4.729090 |
| 1HUP | A | VAL | 214 | E | -9.083574  | 7.725681  | -12.979078 | -4.120909 |
| 1HUP | A | PRO | 215 | T | -8.277075  | 7.538185  | -12.703724 | -4.332773 |
| 1HUP | A | CYS | 216 | T | -8.009893  | 7.956893  | -12.696719 | -4.505297 |
| 1HUP | A | SER | 217 | T | -7.974233  | 8.172554  | -12.658726 | -4.504672 |
| 1HUP | A | THR | 218 | T | -7.971969  | 8.197452  | -12.655464 | -4.504375 |
| 1HUP | A | SER | 219 | C | -8.067590  | 8.302872  | -12.605849 | -4.573278 |
| 1HUP | A | HIS | 220 | E | -8.504859  | 9.211611  | -12.603755 | -4.756148 |
| 1HUP | A | LEU | 221 | E | -9.580020  | 11.875512 | -12.186104 | -4.488813 |
| 1HUP | A | ALA | 222 | E | -10.855313 | 13.649722 | -12.986317 | -4.408143 |
| 1HUP | A | VAL | 223 | E | -11.570097 | 15.251715 | -12.640713 | -4.276566 |
| 1HUP | A | CYS | 224 | E | -11.588318 | 14.732099 | -14.024281 | -5.114638 |
| 1HUP | A | GLU | 225 | E | -8.946525  | 13.286025 | -9.807641  | -4.080077 |
| 1HUP | A | PHE | 226 | E | -8.946525  | 13.286025 | -9.807641  | -4.080077 |
| 1HUP | A | PRO | 227 | E | -8.946525  | 13.286025 | -9.807641  | -4.080077 |
| 1HUP | A | ILE | 228 | C | -8.946525  | 13.286025 | -9.807641  | -4.080077 |
| 1HZI | A | HIS | 1   | T | -5.483398  | 4.762984  | -11.489501 | -4.712137 |
| 1HZI | A | LYS | 2   | T | -5.483398  | 4.762984  | -11.489501 | -4.712137 |
| 1HZI | A | CYS | 3   | T | -5.483398  | 4.762984  | -11.489501 | -4.712137 |
| 1HZI | A | ASP | 4   | T | -5.483398  | 4.762984  | -11.489501 | -4.712137 |
| 1HZI | A | ILE | 5   | H | -5.734462  | 5.258967  | -11.705642 | -5.053760 |
| 1HZI | A | THR | 6   | H | -6.164260  | 6.569059  | -11.746298 | -5.561444 |
| 1HZI | A | LEU | 7   | H | -8.298843  | 10.336334 | -13.807557 | -6.355655 |
| 1HZI | A | GLN | 8   | H | -9.334431  | 11.196188 | -13.467708 | -5.027059 |
| 1HZI | A | ALA | 9   | H | -9.105604  | 11.728443 | -12.520552 | -4.693058 |
| 1HZI | A | ILE | 10  | H | -9.251070  | 13.255770 | -11.907426 | -4.720252 |
| 1HZI | A | ILE | 11  | H | -9.243540  | 13.157150 | -11.969633 | -4.723893 |
| 1HZI | A | LYS | 12  | H | -9.207855  | 12.991634 | -12.155651 | -4.762419 |
| 1HZI | A | THR | 13  | H | -9.327193  | 13.383591 | -11.967872 | -4.811918 |
| 1HZI | A | LEU | 14  | H | -9.822116  | 14.322370 | -12.251347 | -5.014057 |
| 1HZI | A | ASN | 15  | H | -10.214288 | 11.243466 | -15.074458 | -5.375465 |
| 1HZI | A | SER | 16  | H | -10.299836 | 11.079761 | -15.250999 | -5.426754 |
| 1HZI | A | LEU | 17  | H | -10.549460 | 10.966329 | -15.733504 | -5.554476 |
| 1HZI | A | THR | 18  | H | -10.119793 | 9.808366  | -16.306646 | -5.906440 |
| 1HZI | A | GLU | 19  | C | -9.950026  | 9.545556  | -16.408428 | -5.894886 |
| 1HZI | A | GLN | 20  | C | -10.096285 | 9.218631  | -16.816727 | -6.041564 |
| 1HZI | A | LYS | 21  | C | -9.118786  | 10.067857 | -14.092049 | -5.554113 |
| 1HZI | A | THR | 22  | T | -8.993961  | 10.355494 | -14.087840 | -5.601129 |
| 1HZI | A | LEU | 23  | T | -8.967735  | 10.639994 | -13.890698 | -5.556609 |
| 1HZI | A | CYS | 24  | T | -8.520365  | 11.147513 | -13.178216 | -5.630781 |
| 1HZI | A | THR | 25  | T | -8.363992  | 11.600104 | -12.782926 | -5.499713 |
| 1HZI | A | GLU | 26  | T | -8.257622  | 12.171797 | -12.101902 | -5.324450 |
| 1HZI | A | LEU | 27  | T | -8.282166  | 12.227184 | -11.997658 | -5.291408 |
| 1HZI | A | THR | 28  | E | -8.259591  | 12.386941 | -11.883229 | -5.254092 |
| 1HZI | A | VAL | 29  | E | -8.517981  | 12.905194 | -11.425360 | -5.006502 |
| 1HZI | A | THR | 30  | E | -8.695949  | 13.033949 | -11.397876 | -4.997839 |
| 1HZI | A | ASP | 31  | T | -9.229323  | 14.846638 | -11.567573 | -5.049189 |
| 1HZI | A | ILE | 32  | T | -8.293919  | 13.623422 | -9.741181  | -4.430312 |
| 1HZI | A | PHE | 33  | T | -6.872399  | 10.752663 | -8.900629  | -4.245936 |
| 1HZI | A | ALA | 34  | T | -6.132762  | 6.907370  | -10.256794 | -4.248551 |
| 1HZI | A | ALA | 35  | T | -5.801090  | 5.907496  | -10.793415 | -4.360737 |

|      |   |     |     |   |            |           |            |           |
|------|---|-----|-----|---|------------|-----------|------------|-----------|
| 1HZI | A | SER | 36  | T | -5.327878  | 5.531126  | -10.702158 | -4.553053 |
| 1HZI | A | LYS | 37  | T | -5.325375  | 5.510652  | -10.739159 | -4.566561 |
| 1HZI | A | ASN | 38  | T | -5.366257  | 5.153211  | -10.879506 | -4.591499 |
| 1HZI | A | THR | 39  | C | -5.494473  | 5.107643  | -10.902512 | -4.675755 |
| 1HZI | A | THR | 40  | C | -5.669355  | 5.287982  | -10.695031 | -4.732529 |
| 1HZI | A | GLU | 41  | H | -7.978398  | 7.986342  | -13.988304 | -5.811382 |
| 1HZI | A | LYS | 42  | H | -9.092781  | 9.172187  | -15.104022 | -5.840981 |
| 1HZI | A | GLU | 43  | H | -9.370806  | 9.495010  | -14.821699 | -5.777352 |
| 1HZI | A | THR | 44  | H | -10.582563 | 11.456562 | -15.477397 | -6.043808 |
| 1HZI | A | PHE | 45  | H | -13.161247 | 16.562771 | -17.616383 | -6.605266 |
| 1HZI | A | CYS | 46  | H | -13.309187 | 13.544051 | -18.045061 | -5.631302 |
| 1HZI | A | ARG | 47  | H | -13.112863 | 12.378400 | -17.328566 | -4.866812 |
| 1HZI | A | ALA | 48  | H | -10.971454 | 13.681261 | -12.055076 | -3.898713 |
| 1HZI | A | ALA | 49  | H | -10.674991 | 13.580129 | -12.206965 | -3.910540 |
| 1HZI | A | THR | 50  | H | -10.597128 | 13.496617 | -12.453820 | -3.981710 |
| 1HZI | A | VAL | 51  | H | -10.598042 | 13.526351 | -12.429996 | -3.978542 |
| 1HZI | A | LEU | 52  | H | -10.602937 | 13.533659 | -12.396760 | -3.973576 |
| 1HZI | A | ARG | 53  | H | -11.039630 | 13.340596 | -12.937137 | -4.087179 |
| 1HZI | A | GLN | 54  | H | -11.784409 | 13.260467 | -14.344311 | -4.558923 |
| 1HZI | A | PHE | 55  | H | -12.984215 | 16.983463 | -15.668333 | -5.369170 |
| 1HZI | A | TYR | 56  | H | -12.648617 | 14.882412 | -16.701936 | -5.730333 |
| 1HZI | A | SER | 57  | H | -10.593476 | 8.670721  | -15.969208 | -5.248951 |
| 1HZI | A | HIS | 58  | H | -10.453916 | 8.562726  | -16.332520 | -5.345556 |
| 1HZI | A | HIS | 59  | H | -10.304625 | 8.537761  | -16.477580 | -5.379762 |
| 1HZI | A | GLU | 60  | H | -9.059277  | 6.560678  | -14.855430 | -4.867252 |
| 1HZI | A | LYS | 61  | C | -8.638479  | 6.277256  | -14.785027 | -4.851735 |
| 1HZI | A | ASP | 62  | T | -8.602301  | 6.295417  | -14.784094 | -4.829580 |
| 1HZI | A | THR | 63  | T | -8.029853  | 7.419134  | -13.312915 | -4.724621 |
| 1HZI | A | ARG | 64  | T | -7.969039  | 7.497399  | -13.351554 | -4.729045 |
| 1HZI | A | CYS | 65  | T | -6.686128  | 6.890992  | -11.487804 | -4.805533 |
| 1HZI | A | LEU | 66  | T | -4.884586  | 5.650697  | -8.831396  | -4.163435 |
| 1HZI | A | GLY | 67  | C | -4.448578  | 4.738479  | -9.476773  | -4.379513 |
| 1HZI | A | ALA | 68  | C | -4.426897  | 4.769466  | -9.540910  | -4.392239 |
| 1HZI | A | THR | 69  | C | -4.426888  | 4.769709  | -9.541007  | -4.392355 |
| 1HZI | A | ALA | 70  | H | -4.438805  | 4.728318  | -9.504973  | -4.383678 |
| 1HZI | A | GLN | 71  | H | -4.792365  | 4.024143  | -10.154142 | -4.587028 |
| 1HZI | A | GLN | 72  | H | -6.370679  | 5.716860  | -11.318032 | -4.730607 |
| 1HZI | A | PHE | 73  | H | -9.263751  | 9.025669  | -14.112403 | -5.268060 |
| 1HZI | A | HIS | 74  | H | -11.193791 | 11.521206 | -18.078773 | -6.987012 |
| 1HZI | A | ARG | 75  | H | -11.941847 | 13.869025 | -19.957689 | -8.988886 |
| 1HZI | A | HIS | 76  | H | -13.708314 | 14.666888 | -19.130900 | -6.354860 |
| 1HZI | A | LYS | 77  | H | -13.129080 | 15.189403 | -16.981684 | -5.671750 |
| 1HZI | A | GLN | 78  | H | -13.152008 | 15.664650 | -16.664924 | -5.654570 |
| 1HZI | A | LEU | 79  | H | -13.152122 | 16.125862 | -16.384555 | -5.626208 |
| 1HZI | A | ILE | 80  | H | -13.127877 | 16.269498 | -16.381727 | -5.633195 |
| 1HZI | A | ARG | 81  | H | -13.211791 | 16.262463 | -16.335234 | -5.605075 |
| 1HZI | A | PHE | 82  | H | -14.015366 | 19.002082 | -16.781969 | -5.868142 |
| 1HZI | A | LEU | 83  | H | -14.115681 | 19.019020 | -16.841133 | -5.825447 |
| 1HZI | A | LYS | 84  | H | -13.991260 | 16.067973 | -17.996146 | -5.683666 |
| 1HZI | A | ARG | 85  | H | -13.468548 | 13.057224 | -18.160977 | -5.348148 |
| 1HZI | A | LEU | 86  | H | -13.358914 | 13.140157 | -17.933158 | -5.245836 |
| 1HZI | A | ASP | 87  | H | -13.370812 | 12.937281 | -17.977346 | -5.220258 |
| 1HZI | A | ARG | 88  | H | -13.158023 | 12.797481 | -17.890658 | -5.198514 |
| 1HZI | A | ASN | 89  | H | -13.156638 | 13.150833 | -17.758807 | -5.234421 |
| 1HZI | A | LEU | 90  | H | -12.950207 | 14.744781 | -16.293518 | -5.017345 |
| 1HZI | A | TRP | 91  | H | -11.046970 | 11.201227 | -14.776667 | -4.886191 |
| 1HZI | A | GLY | 92  | H | -8.514194  | 8.721772  | -12.238937 | -4.504504 |
| 1HZI | A | LEU | 93  | H | -7.775077  | 9.468872  | -11.293627 | -4.495463 |
| 1HZI | A | ALA | 94  | H | -5.509455  | 5.329652  | -9.571952  | -4.034884 |
| 1HZI | A | GLY | 95  | C | -5.171995  | 5.064326  | -10.119205 | -4.312684 |
| 1HZI | A | LEU | 96  | C | -5.145958  | 5.074972  | -10.199491 | -4.319519 |
| 1HZI | A | ASN | 97  | C | -4.831457  | 6.031364  | -9.549831  | -4.344534 |
| 1HZI | A | SER | 98  | C | -4.740647  | 6.090702  | -9.551785  | -4.330579 |
| 1HZI | A | CYS | 99  | C | -4.914697  | 6.431268  | -9.592819  | -4.452122 |
| 1HZI | A | PRO | 100 | C | -5.043199  | 7.093622  | -9.222744  | -4.370231 |
| 1HZI | A | VAL | 101 | C | -5.045499  | 7.184208  | -9.189141  | -4.384147 |
| 1HZI | A | LYS | 102 | C | -5.574956  | 6.862743  | -10.028865 | -4.397913 |
| 1HZI | A | GLU | 103 | C | -6.114422  | 7.338512  | -10.675405 | -4.616902 |
| 1HZI | A | ALA | 104 | C | -6.195828  | 7.214529  | -10.540310 | -4.552118 |
| 1HZI | A | ASN | 105 | C | -7.017439  | 7.770075  | -11.614737 | -4.964400 |
| 1HZI | A | GLN | 106 | E | -8.408221  | 6.577934  | -14.760336 | -5.460274 |
| 1HZI | A | SER | 107 | E | -9.623786  | 6.795857  | -16.454689 | -5.476260 |
| 1HZI | A | THR | 108 | E | -9.873015  | 6.890199  | -16.238521 | -5.413260 |
| 1HZI | A | LEU | 109 | H | -11.545321 | 13.422581 | -15.868782 | -5.549740 |
| 1HZI | A | GLU | 110 | H | -11.591934 | 13.789241 | -15.654751 | -5.555546 |
| 1HZI | A | ASN | 111 | H | -11.441643 | 14.416145 | -15.318739 | -5.536509 |
| 1HZI | A | PHE | 112 | H | -11.777476 | 17.073580 | -14.372281 | -5.584275 |
| 1HZI | A | LEU | 113 | H | -11.920669 | 17.244617 | -14.292516 | -5.558900 |
| 1HZI | A | GLU | 114 | H | -11.559521 | 14.862653 | -14.925719 | -5.569220 |
| 1HZI | A | ARG | 115 | H | -11.060708 | 14.974915 | -13.984310 | -5.328981 |
| 1HZI | A | LEU | 116 | H | -11.042606 | 15.050663 | -14.051855 | -5.412147 |



|      |   |     |     |   |            |           |            |           |
|------|---|-----|-----|---|------------|-----------|------------|-----------|
| 1HZI | A | LYS | 117 | H | -11.019925 | 14.948925 | -14.181646 | -5.433300 |
| 1HZI | A | THR | 118 | H | -10.718760 | 13.869112 | -14.548699 | -5.463530 |
| 1HZI | A | ILE | 119 | H | -10.797530 | 13.894424 | -14.526454 | -5.465742 |
| 1HZI | A | MET | 120 | H | -11.074184 | 13.198262 | -15.235910 | -5.649384 |
| 1HZI | A | ARG | 121 | H | -11.151400 | 12.562759 | -15.537493 | -5.661704 |
| 1HZI | A | GLU | 122 | H | -10.810909 | 11.839699 | -16.919137 | -6.608576 |
| 1HZI | A | LYS | 123 | H | -10.695364 | 10.928400 | -17.963354 | -7.192318 |
| 1HZI | A | TYR | 124 | H | -7.962637  | 6.711090  | -13.448500 | -5.189166 |
| 1HZI | A | SER | 125 | H | -6.615038  | 3.952601  | -12.142422 | -4.229824 |
| 1HZI | A | LYS | 126 | H | -5.419452  | 2.902302  | -10.254025 | -3.469956 |
| 1HZI | A | CYS | 127 | H | -5.419452  | 2.902302  | -10.254025 | -3.469956 |
| 1HZI | A | SER | 128 | C | -5.419452  | 2.902302  | -10.254025 | -3.469956 |
| 1HZI | A | SER | 129 | C | -5.419452  | 2.902302  | -10.254025 | -3.469956 |
| 1I1N | A | TRP | 2   | C | -6.485750  | 5.164649  | -11.564837 | -4.361494 |
| 1I1N | A | LYS | 3   | C | -6.485750  | 5.164649  | -11.564837 | -4.361494 |
| 1I1N | A | SER | 4   | C | -6.485750  | 5.164649  | -11.564837 | -4.361494 |
| 1I1N | A | GLY | 5   | C | -6.485750  | 5.164649  | -11.564837 | -4.361494 |
| 1I1N | A | GLY | 6   | T | -7.269798  | 6.073611  | -13.252300 | -5.207637 |
| 1I1N | A | ALA | 7   | T | -8.031371  | 6.636889  | -14.303212 | -5.472702 |
| 1I1N | A | SER | 8   | T | -8.720705  | 7.022972  | -13.640468 | -4.570116 |
| 1I1N | A | HIS | 9   | H | -8.764780  | 6.965781  | -13.290166 | -4.376825 |
| 1I1N | A | SER | 10  | H | -8.763590  | 6.976898  | -13.292125 | -4.376424 |
| 1I1N | A | GLU | 11  | H | -10.145630 | 7.673491  | -14.851526 | -4.527251 |
| 1I1N | A | LEU | 12  | H | -11.839299 | 12.736585 | -15.781194 | -4.889547 |
| 1I1N | A | ILE | 13  | H | -11.943364 | 13.115063 | -15.621202 | -4.913681 |
| 1I1N | A | HIS | 14  | H | -11.701384 | 11.886798 | -16.051087 | -5.002437 |
| 1I1N | A | ASN | 15  | H | -11.776915 | 11.540098 | -16.568609 | -5.177397 |
| 1I1N | A | LEU | 16  | H | -9.841019  | 9.642231  | -13.910278 | -4.950738 |
| 1I1N | A | ARG | 17  | H | -9.198176  | 8.978472  | -13.702714 | -4.861645 |
| 1I1N | A | LYS | 18  | H | -8.127577  | 10.117543 | -11.477633 | -4.744132 |
| 1I1N | A | ASN | 19  | H | -7.633333  | 10.436601 | -11.201971 | -4.867074 |
| 1I1N | A | GLY | 20  | T | -6.743888  | 10.055605 | -9.510223  | -4.464190 |
| 1I1N | A | ILE | 21  | T | -6.660433  | 10.148944 | -9.527329  | -4.440492 |
| 1I1N | A | ILE | 22  | T | -6.604329  | 10.086937 | -9.667485  | -4.472171 |
| 1I1N | A | LYS | 23  | T | -6.601843  | 9.987608  | -9.716664  | -4.468445 |
| 1I1N | A | THR | 24  | C | -6.663425  | 9.913838  | -9.578116  | -4.414573 |
| 1I1N | A | ASP | 25  | H | -7.335072  | 9.848981  | -10.747425 | -4.553882 |
| 1I1N | A | LYS | 26  | H | -7.662146  | 9.203015  | -11.461942 | -4.736885 |
| 1I1N | A | VAL | 27  | H | -8.187382  | 8.937431  | -11.706960 | -4.656516 |
| 1I1N | A | PHE | 28  | H | -10.659425 | 14.220153 | -13.457149 | -5.035373 |
| 1I1N | A | GLU | 29  | H | -10.231684 | 12.306781 | -13.168698 | -4.649102 |
| 1I1N | A | VAL | 30  | H | -10.088491 | 12.475087 | -12.996457 | -4.664827 |
| 1I1N | A | MET | 31  | H | -10.028146 | 12.409823 | -13.181927 | -4.727999 |
| 1I1N | A | LEU | 32  | H | -10.036551 | 12.314457 | -13.216348 | -4.733455 |
| 1I1N | A | ALA | 33  | H | -10.048378 | 12.232301 | -13.216524 | -4.731307 |
| 1I1N | A | THR | 34  | C | -10.551299 | 12.869629 | -13.430355 | -4.910098 |
| 1I1N | A | ASP | 35  | C | -11.323659 | 12.054332 | -15.067354 | -5.287734 |
| 1I1N | A | ARG | 36  | G | -12.851200 | 12.336991 | -17.344602 | -5.468972 |
| 1I1N | A | SER | 37  | G | -11.574616 | 12.015663 | -14.592513 | -4.764272 |
| 1I1N | A | HIS | 38  | G | -9.225113  | 11.254526 | -11.636283 | -4.509499 |
| 1I1N | A | TYR | 39  | C | -6.430551  | 9.956541  | -8.950525  | -4.588222 |
| 1I1N | A | ALA | 40  | C | -4.567169  | 6.760762  | -7.050715  | -3.726972 |
| 1I1N | A | LYS | 41  | T | -4.553443  | 6.824513  | -7.095390  | -3.739338 |
| 1I1N | A | CYS | 42  | T | -4.553311  | 6.825333  | -7.096625  | -3.739571 |
| 1I1N | A | ASN | 43  | T | -4.553528  | 6.823719  | -7.094994  | -3.739293 |
| 1I1N | A | PRO | 44  | T | -4.578792  | 6.687497  | -7.014949  | -3.702138 |
| 1I1N | A | TYR | 45  | T | -6.785461  | 9.549067  | -9.033244  | -4.268994 |
| 1I1N | A | MET | 46  | T | -9.484811  | 10.533165 | -12.827288 | -4.798834 |
| 1I1N | A | ASP | 47  | C | -11.058264 | 10.106415 | -16.416439 | -5.192787 |
| 1I1N | A | SER | 48  | C | -10.805990 | 9.549819  | -15.761174 | -4.767108 |
| 1I1N | A | PRO | 49  | C | -8.875524  | 9.102801  | -12.818096 | -4.707815 |
| 1I1N | A | GLN | 50  | E | -8.848417  | 9.227309  | -12.847043 | -4.715491 |
| 1I1N | A | SER | 51  | E | -8.619475  | 10.043706 | -12.292901 | -4.608654 |
| 1I1N | A | ILE | 52  | C | -8.560142  | 10.346249 | -12.212698 | -4.609086 |
| 1I1N | A | GLY | 53  | T | -8.336872  | 11.153972 | -11.712423 | -4.645231 |
| 1I1N | A | PHE | 54  | T | -8.590601  | 12.680821 | -11.068573 | -4.614902 |
| 1I1N | A | GLN | 55  | T | -8.340217  | 12.411652 | -10.831396 | -4.490635 |
| 1I1N | A | ALA | 56  | T | -8.163567  | 12.832093 | -10.040939 | -4.259865 |
| 1I1N | A | THR | 57  | E | -8.046888  | 13.002240 | -9.765306  | -4.157830 |
| 1I1N | A | ILE | 58  | E | -8.168440  | 13.039992 | -9.567766  | -4.022256 |
| 1I1N | A | SER | 59  | C | -8.182953  | 12.947047 | -9.552455  | -4.003776 |
| 1I1N | A | ALA | 60  | C | -8.374302  | 13.364407 | -9.181683  | -3.898521 |
| 1I1N | A | PRO | 61  | H | -8.889643  | 13.638396 | -9.397021  | -3.914712 |
| 1I1N | A | HIS | 62  | H | -10.349408 | 13.680220 | -12.550671 | -4.422936 |
| 1I1N | A | MET | 63  | H | -10.832461 | 14.581582 | -13.193191 | -4.806520 |
| 1I1N | A | HIS | 64  | H | -11.203420 | 16.129997 | -12.847619 | -4.984590 |
| 1I1N | A | ALA | 65  | H | -11.687428 | 16.599504 | -12.998346 | -4.986649 |
| 1I1N | A | TYR | 66  | H | -12.734647 | 18.106764 | -14.522655 | -5.273011 |
| 1I1N | A | ALA | 67  | H | -12.920282 | 18.021789 | -14.526293 | -4.980426 |
| 1I1N | A | LEU | 68  | H | -12.931466 | 18.046557 | -14.492421 | -4.962255 |
| 1I1N | A | GLU | 69  | H | -12.379313 | 14.910274 | -15.560258 | -5.371128 |

|      |   |     |     |   |            |           |            |           |
|------|---|-----|-----|---|------------|-----------|------------|-----------|
| 111N | A | LEU | 70  | H | -12.218371 | 14.660485 | -15.641364 | -5.374825 |
| 111N | A | LEU | 71  | H | -11.828125 | 15.019656 | -14.869596 | -5.289486 |
| 111N | A | PHE | 72  | G | -11.600471 | 14.168391 | -15.092729 | -5.257664 |
| 111N | A | ASP | 73  | G | -11.295426 | 12.248830 | -15.691453 | -5.185289 |
| 111N | A | GLN | 74  | G | -11.331422 | 11.842704 | -15.873516 | -5.164672 |
| 111N | A | LEU | 75  | C | -9.339769  | 8.559878  | -12.944906 | -4.259731 |
| 111N | A | HIS | 76  | T | -9.161203  | 8.1229913 | -13.483432 | -4.388258 |
| 111N | A | GLU | 77  | T | -9.009061  | 8.229953  | -13.565507 | -4.432152 |
| 111N | A | GLY | 78  | T | -8.892717  | 8.775355  | -13.287899 | -4.404824 |
| 111N | A | ALA | 79  | T | -8.892943  | 8.777054  | -13.284265 | -4.403815 |
| 111N | A | LYS | 80  | E | -9.251505  | 9.056815  | -13.651835 | -4.549085 |
| 111N | A | ALA | 81  | E | -9.457396  | 10.007415 | -13.052812 | -4.442745 |
| 111N | A | LEU | 82  | E | -9.854229  | 11.329149 | -12.279556 | -4.299206 |
| 111N | A | ASP | 83  | E | -10.943294 | 10.387931 | -15.000289 | -4.513489 |
| 111N | A | VAL | 84  | E | -10.457640 | 9.899271  | -15.203681 | -4.841338 |
| 111N | A | GLY | 85  | T | -9.116702  | 7.588146  | -14.740012 | -5.330698 |
| 111N | A | SER | 86  | T | -8.940065  | 8.222697  | -14.494949 | -5.331900 |
| 111N | A | GLY | 87  | T | -8.827077  | 8.963303  | -14.117092 | -5.273450 |
| 111N | A | SER | 88  | T | -8.793646  | 9.312279  | -13.963902 | -5.264764 |
| 111N | A | GLY | 89  | T | -8.620901  | 10.638042 | -13.016450 | -5.116190 |
| 111N | A | ILE | 90  | H | -8.889101  | 12.825192 | -11.950973 | -4.933807 |
| 111N | A | LEU | 91  | H | -9.053848  | 13.706435 | -11.364933 | -4.818570 |
| 111N | A | THR | 92  | H | -9.222963  | 14.141042 | -11.045185 | -4.754678 |
| 111N | A | ALA | 93  | H | -9.317154  | 14.197422 | -10.822013 | -4.707285 |
| 111N | A | CYS | 94  | H | -10.694424 | 15.132915 | -12.013742 | -4.631244 |
| 111N | A | PHE | 95  | H | -11.696258 | 16.016877 | -12.721738 | -4.489972 |
| 111N | A | ALA | 96  | H | -11.835276 | 15.161414 | -13.076167 | -4.434362 |
| 111N | A | ARG | 97  | H | -11.872587 | 11.738141 | -15.640339 | -4.976018 |
| 111N | A | MET | 98  | H | -8.386266  | 8.294817  | -11.955775 | -4.430194 |
| 111N | A | VAL | 99  | H | -6.076635  | 5.632890  | -10.517744 | -4.363718 |
| 111N | A | GLY | 100 | T | -5.349708  | 5.222250  | -10.323140 | -4.551373 |
| 111N | A | CYS | 101 | T | -5.246361  | 5.595477  | -10.130227 | -4.464130 |
| 111N | A | THR | 102 | T | -5.244141  | 5.613564  | -10.131610 | -4.462526 |
| 111N | A | GLY | 103 | T | -5.245736  | 5.610742  | -10.125242 | -4.462213 |
| 111N | A | LYS | 104 | E | -5.408810  | 5.625907  | -10.009767 | -4.493495 |
| 111N | A | VAL | 105 | E | -6.308157  | 7.674579  | -9.182807  | -4.010131 |
| 111N | A | ILE | 106 | E | -8.222286  | 10.637073 | -10.821437 | -4.129449 |
| 111N | A | GLY | 107 | E | -8.723031  | 10.917707 | -11.242547 | -4.253928 |
| 111N | A | ILE | 108 | E | -9.695295  | 13.874150 | -11.008444 | -4.259775 |
| 111N | A | ASP | 109 | E | -10.773779 | 13.204835 | -12.665930 | -4.218747 |
| 111N | A | HIS | 110 | C | -11.665324 | 13.467915 | -14.998577 | -4.801989 |
| 111N | A | ILE | 111 | C | -10.911438 | 13.529936 | -12.892484 | -4.334730 |
| 111N | A | LYS | 112 | H | -10.604139 | 12.359800 | -13.167612 | -4.281313 |
| 111N | A | GLU | 113 | H | -10.602889 | 12.325037 | -13.191233 | -4.282389 |
| 111N | A | LEU | 114 | H | -10.610682 | 12.325906 | -13.140263 | -4.266533 |
| 111N | A | VAL | 115 | H | -10.625558 | 12.248762 | -13.114802 | -4.248319 |
| 111N | A | ASP | 116 | H | -11.003449 | 10.959609 | -13.996752 | -4.316041 |
| 111N | A | ASP | 117 | H | -12.447801 | 8.884694  | -18.637451 | -4.910586 |
| 111N | A | SER | 118 | H | -12.564305 | 8.291425  | -19.186061 | -4.977644 |
| 111N | A | VAL | 119 | H | -12.155086 | 9.148474  | -17.413605 | -4.508766 |
| 111N | A | ASN | 120 | H | -12.057370 | 8.888624  | -17.472496 | -4.489150 |
| 111N | A | ASN | 121 | H | -12.122320 | 9.131244  | -17.189619 | -4.419165 |
| 111N | A | VAL | 122 | H | -12.190449 | 9.464651  | -16.846062 | -4.292210 |
| 111N | A | ARG | 123 | H | -12.031112 | 8.474651  | -17.392557 | -4.379572 |
| 111N | A | LYS | 124 | H | -10.451579 | 5.842340  | -16.974484 | -5.027360 |
| 111N | A | ASP | 125 | H | -9.831592  | 7.251258  | -15.410355 | -4.807997 |
| 111N | A | ASP | 126 | C | -9.569016  | 8.553295  | -14.427523 | -4.618104 |
| 111N | A | PRO | 127 | H | -9.006534  | 9.874523  | -12.356253 | -4.132005 |
| 111N | A | THR | 128 | H | -8.849396  | 9.921083  | -12.327790 | -4.120046 |
| 111N | A | LEU | 129 | H | -8.554909  | 10.014960 | -11.986308 | -4.199453 |
| 111N | A | LEU | 130 | H | -8.596004  | 10.162865 | -11.812519 | -4.164240 |
| 111N | A | SER | 131 | H | -8.634872  | 10.100460 | -11.774753 | -4.157579 |
| 111N | A | SER | 132 | H | -8.869816  | 9.804543  | -12.128300 | -4.319461 |
| 111N | A | GLY | 133 | T | -9.034259  | 9.726524  | -12.082920 | -4.394966 |
| 111N | A | ARG | 134 | T | -11.063169 | 8.640842  | -16.002144 | -4.592367 |
| 111N | A | VAL | 135 | E | -9.569180  | 14.626152 | -9.613195  | -3.954337 |
| 111N | A | GLN | 136 | E | -8.690338  | 12.407895 | -10.254314 | -4.200422 |
| 111N | A | LEU | 137 | E | -7.471237  | 11.410487 | -9.168900  | -4.215670 |
| 111N | A | VAL | 138 | E | -6.627918  | 8.893758  | -9.689147  | -4.298170 |
| 111N | A | VAL | 139 | E | -6.614815  | 8.892969  | -9.760303  | -4.309526 |
| 111N | A | GLY | 140 | C | -6.610603  | 8.826049  | -9.818392  | -4.315335 |
| 111N | A | ASP | 141 | C | -6.603023  | 8.717288  | -9.902062  | -4.322855 |
| 111N | A | GLY | 142 | G | -6.736305  | 8.074775  | -10.127352 | -4.349348 |
| 111N | A | ARG | 143 | G | -8.172675  | 7.866924  | -12.940128 | -4.606936 |
| 111N | A | MET | 144 | G | -8.026361  | 8.181867  | -12.641841 | -4.637927 |
| 111N | A | GLY | 145 | C | -8.055960  | 8.499063  | -12.568352 | -4.709676 |
| 111N | A | TYR | 146 | C | -8.206004  | 9.310611  | -12.529967 | -4.865102 |
| 111N | A | ALA | 147 | G | -6.701344  | 7.646208  | -10.310832 | -4.382322 |
| 111N | A | GLU | 148 | G | -6.700923  | 7.649887  | -10.313245 | -4.382840 |
| 111N | A | GLU | 149 | G | -6.730466  | 7.577219  | -10.212428 | -4.362328 |
| 111N | A | ALA | 150 | C | -6.736897  | 7.561787  | -10.173493 | -4.352854 |

|      |   |     |     |   |            |           |            |           |
|------|---|-----|-----|---|------------|-----------|------------|-----------|
| 111N | A | PRO | 151 | C | -6.749191  | 7.512241  | -10.125427 | -4.341670 |
| 111N | A | TYR | 152 | E | -10.651200 | 13.571432 | -13.317254 | -4.827311 |
| 111N | A | ASP | 153 | E | -11.094256 | 14.672195 | -12.736968 | -4.427902 |
| 111N | A | ALA | 154 | E | -10.566654 | 14.460907 | -11.820227 | -4.112459 |
| 111N | A | ILE | 155 | E | -10.273735 | 14.513686 | -11.146895 | -3.942394 |
| 111N | A | HIS | 156 | E | -9.989198  | 13.746508 | -11.254158 | -3.865858 |
| 111N | A | VAL | 157 | E | -9.388684  | 12.785033 | -10.479034 | -3.508514 |
| 111N | A | GLY | 158 | C | -9.084335  | 11.726113 | -10.719067 | -3.407908 |
| 111N | A | ALA | 159 | C | -7.818023  | 8.140499  | -9.896834  | -2.939740 |
| 111N | A | ALA | 160 | B | -6.669275  | 8.240905  | -7.807565  | -2.631441 |
| 111N | A | ALA | 161 | B | -5.863734  | 8.701951  | -6.577249  | -2.559103 |
| 111N | A | PRO | 162 | T | -5.704937  | 8.590892  | -6.851948  | -2.662172 |
| 111N | A | VAL | 163 | T | -5.694096  | 8.596985  | -6.899767  | -2.673069 |
| 111N | A | VAL | 164 | T | -5.708686  | 8.620930  | -6.828083  | -2.668121 |
| 111N | A | PRO | 165 | C | -5.818671  | 8.693325  | -6.699037  | -2.685792 |
| 111N | A | GLN | 166 | H | -6.506782  | 8.335905  | -7.929185  | -3.027680 |
| 111N | A | ALA | 167 | H | -7.965331  | 9.258831  | -9.778313  | -3.337893 |
| 111N | A | LEU | 168 | H | -9.322354  | 11.482889 | -11.401335 | -4.010915 |
| 111N | A | ILE | 169 | H | -9.411725  | 11.221191 | -11.383971 | -4.034340 |
| 111N | A | ASP | 170 | H | -9.424800  | 11.148930 | -11.398262 | -4.052133 |
| 111N | A | GLN | 171 | H | -11.325627 | 13.459121 | -14.955636 | -5.058876 |
| 111N | A | LEU | 172 | E | -7.869151  | 9.872920  | -10.796158 | -4.700017 |
| 111N | A | LYS | 173 | E | -7.805417  | 9.688323  | -11.115918 | -4.742897 |
| 111N | A | PRO | 174 | E | -7.780101  | 9.716224  | -11.207389 | -4.751190 |
| 111N | A | GLY | 175 | E | -7.777814  | 9.727493  | -11.215500 | -4.751599 |
| 111N | A | GLY | 176 | E | -7.777803  | 9.731229  | -11.212979 | -4.751112 |
| 111N | A | ARG | 177 | E | -8.921587  | 8.964311  | -13.724948 | -5.056747 |
| 111N | A | LEU | 178 | E | -9.531382  | 11.429415 | -12.890123 | -4.791597 |
| 111N | A | ILE | 179 | E | -9.681179  | 15.813611 | -10.101125 | -4.110098 |
| 111N | A | LEU | 180 | E | -9.481891  | 14.860924 | -10.054192 | -3.794839 |
| 111N | A | PRO | 181 | E | -7.635607  | 9.699477  | -8.640794  | -3.049907 |
| 111N | A | VAL | 182 | E | -5.772314  | 6.370975  | -8.460510  | -3.451829 |
| 111N | A | GLY | 183 | C | -3.290013  | 3.196781  | -7.420583  | -3.886534 |
| 111N | A | PRO | 184 | T | -1.539529  | 2.857157  | -5.713654  | -3.950415 |
| 111N | A | ALA | 185 | T | -1.537506  | 2.864465  | -5.729726  | -3.954308 |
| 111N | A | GLY | 186 | T | -1.537505  | 2.864311  | -5.729909  | -3.954382 |
| 111N | A | GLY | 187 | T | -1.538020  | 2.861047  | -5.726851  | -3.954327 |
| 111N | A | ASN | 188 | C | -1.573820  | 2.820076  | -5.576625  | -3.925945 |
| 111N | A | GLN | 189 | E | -4.981996  | 4.615087  | -9.679037  | -4.550057 |
| 111N | A | MET | 190 | E | -7.642335  | 5.327382  | -13.277223 | -4.960432 |
| 111N | A | LEU | 191 | E | -10.506353 | 11.200151 | -15.647912 | -5.918595 |
| 111N | A | GLU | 192 | E | -13.303348 | 12.923345 | -16.964340 | -5.262055 |
| 111N | A | GLN | 193 | E | -15.874141 | 18.387082 | -20.937873 | -7.052122 |
| 111N | A | TYR | 194 | E | -13.360188 | 15.952938 | -19.723160 | -8.223291 |
| 111N | A | ASP | 195 | E | -10.770944 | 9.821383  | -17.598830 | -6.635493 |
| 111N | A | LYS | 196 | E | -7.348291  | 7.185029  | -11.620899 | -4.762466 |
| 111N | A | LEU | 197 | T | -5.423235  | 4.475338  | -9.945476  | -4.187844 |
| 111N | A | GLN | 198 | T | -4.708670  | 5.477982  | -8.781479  | -4.112967 |
| 111N | A | ASP | 199 | T | -4.679145  | 5.560566  | -8.863664  | -4.137498 |
| 111N | A | GLY | 200 | T | -4.674291  | 5.582985  | -8.880876  | -4.140974 |
| 111N | A | SER | 201 | C | -4.678786  | 5.579560  | -8.857481  | -4.135390 |
| 111N | A | ILE | 202 | E | -4.750507  | 6.791721  | -8.267693  | -4.148953 |
| 111N | A | LYS | 203 | E | -5.443785  | 9.622019  | -8.254051  | -4.373504 |
| 111N | A | MET | 204 | E | -5.461262  | 10.263616 | -7.933140  | -4.384827 |
| 111N | A | LYS | 205 | E | -5.119918  | 10.018313 | -7.755306  | -4.421877 |
| 111N | A | PRO | 206 | E | -4.849870  | 10.309028 | -7.197637  | -4.276179 |
| 111N | A | LEU | 207 | E | -4.336330  | 9.564826  | -6.183958  | -3.938338 |
| 111N | A | MET | 208 | E | -4.352008  | 9.550803  | -6.128816  | -3.923974 |
| 111N | A | GLY | 209 | E | -4.363478  | 9.521212  | -6.080264  | -3.905277 |
| 111N | A | VAL | 210 | E | -4.443646  | 9.502715  | -5.851877  | -3.821859 |
| 111N | A | ILE | 211 | C | -4.566108  | 9.204140  | -5.751436  | -3.773677 |
| 111N | A | TYR | 212 | C | -7.093695  | 10.754483 | -9.417129  | -4.174406 |
| 111N | A | VAL | 213 | C | -7.509171  | 10.517620 | -9.623753  | -4.032585 |
| 111N | A | PRO | 214 | B | -8.714308  | 12.110367 | -9.593074  | -3.541119 |
| 111N | A | LEU | 215 | C | -9.934647  | 13.625140 | -11.046954 | -3.888685 |
| 111N | A | THR | 216 | C | -9.601552  | 7.737401  | -15.347061 | -5.301750 |
| 111N | A | ASP | 217 | C | -9.604999  | 7.569801  | -15.479313 | -5.340811 |
| 111N | A | LYS | 218 | H | -9.667484  | 7.025180  | -15.915658 | -5.535334 |
| 111N | A | GLU | 219 | H | -9.502916  | 7.976441  | -16.105907 | -5.941059 |
| 111N | A | LYS | 220 | H | -9.365835  | 8.396215  | -15.939925 | -5.936953 |
| 111N | A | GLN | 221 | H | -8.550436  | 8.743037  | -12.864326 | -4.908762 |
| 111N | A | TRP | 222 | C | -4.012511  | 6.465125  | -5.415091  | -2.997071 |
| 111N | A | SER | 223 | C | -4.012511  | 6.465125  | -5.415091  | -2.997071 |
| 111N | A | ARG | 224 | C | -4.012511  | 6.465125  | -5.415091  | -2.997071 |
| 111N | A | TRP | 225 | C | -4.012511  | 6.465125  | -5.415091  | -2.997071 |
| 1I27 | A | GLY | 445 | C | -2.324716  | -0.648962 | -8.787863  | -3.702097 |
| 1I27 | A | PRO | 446 | G | -2.324716  | -0.648962 | -8.787863  | -3.702097 |
| 1I27 | A | LEU | 447 | G | -2.324716  | -0.648962 | -8.787863  | -3.702097 |
| 1I27 | A | GLY | 448 | G | -2.324716  | -0.648962 | -8.787863  | -3.702097 |
| 1I27 | A | SER | 449 | C | -2.774373  | -0.267728 | -9.651908  | -4.274094 |
| 1I27 | A | GLY | 450 | C | -3.177841  | -0.040300 | -10.326881 | -4.852227 |

|      |   |     |      |   |            |           |            |           |
|------|---|-----|------|---|------------|-----------|------------|-----------|
| 1I27 | A | ASP | 451  | C | -5.951385  | 3.720361  | -14.079509 | -5.817290 |
| 1I27 | A | VAL | 452  | C | -6.327038  | 7.116232  | -12.624922 | -5.494460 |
| 1I27 | A | GLN | 453  | C | -6.382064  | 8.644770  | -11.374906 | -5.087883 |
| 1I27 | A | VAL | 454  | C | -6.476810  | 9.696603  | -10.157053 | -4.581630 |
| 1I27 | A | THR | 455  | C | -6.788936  | 10.149013 | -10.141105 | -4.519796 |
| 1I27 | A | GLU | 456  | H | -6.986360  | 10.348215 | -10.079665 | -4.565608 |
| 1I27 | A | ASP | 457  | H | -7.306033  | 10.236628 | -10.468950 | -4.719726 |
| 1I27 | A | ALA | 458  | H | -8.059600  | 10.745473 | -11.092590 | -4.741945 |
| 1I27 | A | VAL | 459  | H | -9.016371  | 10.548347 | -12.241012 | -4.721074 |
| 1I27 | A | ARG | 460  | H | -10.344903 | 10.865256 | -13.594361 | -4.543685 |
| 1I27 | A | ARG | 461  | H | -11.764458 | 9.381080  | -15.286429 | -3.981771 |
| 1I27 | A | TYR | 462  | H | -12.127071 | 14.092203 | -14.581367 | -4.956351 |
| 1I27 | A | LEU | 463  | H | -9.228368  | 12.201152 | -10.859849 | -4.333309 |
| 1I27 | A | THR | 464  | H | -8.750611  | 11.971061 | -11.231116 | -4.593181 |
| 1I27 | A | ARG | 465  | H | -8.684101  | 12.123872 | -11.334729 | -4.646329 |
| 1I27 | A | LYS | 466  | C | -8.487509  | 12.844958 | -11.265325 | -4.859784 |
| 1I27 | A | PRO | 467  | C | -7.870232  | 13.905507 | -9.892414  | -4.972078 |
| 1I27 | A | MET | 468  | B | -7.455740  | 12.507832 | -10.215407 | -5.101841 |
| 1I27 | A | THR | 469  | C | -6.442834  | 12.301721 | -8.269581  | -4.784701 |
| 1I27 | A | THR | 470  | H | -6.425968  | 12.312421 | -8.306229  | -4.773933 |
| 1I27 | A | LYS | 471  | H | -6.411313  | 12.244115 | -8.365554  | -4.758567 |
| 1I27 | A | ASP | 472  | H | -6.444097  | 12.116965 | -8.325214  | -4.743148 |
| 1I27 | A | LEU | 473  | H | -6.506509  | 12.218830 | -8.076869  | -4.698055 |
| 1I27 | A | LEU | 474  | H | -8.030638  | 11.889716 | -10.387524 | -4.490127 |
| 1I27 | A | LYS | 475  | H | -8.384090  | 11.213811 | -10.929887 | -4.529483 |
| 1I27 | A | LYS | 476  | H | -9.800426  | 15.257564 | -12.307847 | -5.246308 |
| 1I27 | A | PHE | 477  | C | -9.817469  | 14.448068 | -12.630405 | -5.147326 |
| 1I27 | A | GLN | 478  | C | -8.844714  | 9.915701  | -12.813585 | -4.890006 |
| 1I27 | A | THR | 479  | H | -6.220364  | 7.888400  | -10.636787 | -5.170933 |
| 1I27 | A | LYS | 480  | H | -6.068517  | 8.223692  | -10.665291 | -5.184225 |
| 1I27 | A | LYS | 481  | H | -6.067007  | 8.227232  | -10.674514 | -5.185191 |
| 1I27 | A | THR | 482  | H | -6.062734  | 8.211396  | -10.695820 | -5.179621 |
| 1I27 | A | GLY | 483  | C | -6.062369  | 8.179381  | -10.709510 | -5.176145 |
| 1I27 | A | LEU | 484  | C | -6.898021  | 9.129193  | -11.037457 | -5.176075 |
| 1I27 | A | SER | 485  | C | -8.330436  | 6.423503  | -14.112189 | -4.569813 |
| 1I27 | A | SER | 486  | H | -8.383065  | 6.006028  | -14.132104 | -4.442157 |
| 1I27 | A | GLU | 487  | H | -8.585684  | 5.902243  | -14.504214 | -4.487145 |
| 1I27 | A | GLN | 488  | H | -9.023244  | 7.327060  | -14.682219 | -4.575786 |
| 1I27 | A | THR | 489  | H | -9.115597  | 7.977332  | -14.467224 | -4.645525 |
| 1I27 | A | VAL | 490  | H | -9.013352  | 8.712860  | -13.471438 | -4.317287 |
| 1I27 | A | ASN | 491  | H | -9.078833  | 8.820461  | -13.307980 | -4.259603 |
| 1I27 | A | VAL | 492  | H | -9.320906  | 9.508558  | -12.695562 | -3.974938 |
| 1I27 | A | LEU | 493  | H | -9.432825  | 9.595028  | -12.352520 | -3.821425 |
| 1I27 | A | ALA | 494  | H | -9.372309  | 9.546776  | -12.429035 | -3.842285 |
| 1I27 | A | GLN | 495  | H | -9.442035  | 10.605868 | -12.259153 | -4.037942 |
| 1I27 | A | ILE | 496  | H | -9.422387  | 10.978486 | -12.088470 | -4.040112 |
| 1I27 | A | LEU | 497  | H | -9.009258  | 11.078204 | -11.906079 | -4.257044 |
| 1I27 | A | LYS | 498  | H | -8.433646  | 10.074950 | -11.596650 | -4.218915 |
| 1I27 | A | ARG | 499  | H | -8.449923  | 10.073519 | -11.568446 | -4.227135 |
| 1I27 | A | LEU | 500  | H | -8.193071  | 10.613409 | -11.079636 | -4.269347 |
| 1I27 | A | ASN | 501  | C | -8.114659  | 10.539463 | -11.386395 | -4.397133 |
| 1I27 | A | PRO | 502  | C | -8.164515  | 10.517890 | -11.455665 | -4.446470 |
| 1I27 | A | GLU | 503  | E | -8.175292  | 11.820397 | -13.054357 | -6.131286 |
| 1I27 | A | ARG | 504  | E | -7.171773  | 9.913096  | -10.792461 | -4.907291 |
| 1I27 | A | LYS | 505  | E | -4.649835  | 7.039542  | -7.883627  | -4.453279 |
| 1I27 | A | MET | 506  | E | -1.989857  | 5.884952  | -4.839947  | -4.203264 |
| 1I27 | A | ILE | 507  | E | -1.925616  | 6.123905  | -4.972987  | -4.267656 |
| 1I27 | A | ASN | 508  | T | -1.923411  | 6.136199  | -4.987149  | -4.271892 |
| 1I27 | A | ASP | 509  | T | -1.923481  | 6.135790  | -4.986497  | -4.271829 |
| 1I27 | A | LYS | 510  | E | -1.929844  | 6.121522  | -4.951669  | -4.266527 |
| 1I27 | A | MET | 511  | E | -3.293131  | 7.856766  | -5.902190  | -4.566978 |
| 1I27 | A | HIS | 512  | E | -5.280694  | 8.998616  | -8.442895  | -5.103042 |
| 1I27 | A | PHE | 513  | E | -8.975190  | 15.311114 | -13.015866 | -7.049010 |
| 1I27 | A | SER | 514  | E | -7.265403  | 8.072922  | -10.047590 | -3.963299 |
| 1I27 | A | LEU | 515  | C | -7.265403  | 8.072922  | -10.047590 | -3.963299 |
| 1I27 | A | LYS | 516  | C | -7.265403  | 8.072922  | -10.047590 | -3.963299 |
| 1I27 | A | GLU | 517  | C | -7.265403  | 8.072922  | -10.047590 | -3.963299 |
| 1I2T | A | HIS | 1009 | H | -8.350529  | 5.413890  | -12.787005 | -3.509264 |
| 1I2T | A | ARG | 1010 | H | -8.350529  | 5.413890  | -12.787005 | -3.509264 |
| 1I2T | A | GLN | 1011 | H | -8.350529  | 5.413890  | -12.787005 | -3.509264 |
| 1I2T | A | ALA | 1012 | H | -8.350529  | 5.413890  | -12.787005 | -3.509264 |
| 1I2T | A | LEU | 1013 | H | -8.652050  | 11.811175 | -11.066279 | -4.309686 |
| 1I2T | A | GLY | 1014 | H | -8.649135  | 13.190199 | -10.499896 | -4.435713 |
| 1I2T | A | GLU | 1015 | H | -8.630688  | 13.443988 | -10.298639 | -4.374224 |
| 1I2T | A | ARG | 1016 | H | -8.661060  | 13.644647 | -10.003039 | -4.289880 |
| 1I2T | A | LEU | 1017 | H | -8.680510  | 13.738104 | -9.811915  | -4.227723 |
| 1I2T | A | TYR | 1018 | H | -9.317342  | 13.715414 | -10.779518 | -4.463407 |
| 1I2T | A | PRO | 1019 | H | -10.031572 | 13.195375 | -11.247099 | -4.191926 |
| 1I2T | A | ARG | 1020 | H | -12.342088 | 10.993899 | -16.232290 | -4.278958 |
| 1I2T | A | VAL | 1021 | H | -11.259813 | 12.090843 | -14.864152 | -5.008837 |
| 1I2T | A | GLN | 1022 | H | -10.008763 | 8.940186  | -14.564725 | -4.883349 |

|      |   |     |      |   |            |           |            |           |
|------|---|-----|------|---|------------|-----------|------------|-----------|
| 1I2T | A | ALA | 1023 | H | -8.268872  | 7.628134  | -12.156147 | -4.340624 |
| 1I2T | A | MET | 1024 | H | -8.219298  | 7.885031  | -12.208716 | -4.382058 |
| 1I2T | A | GLN | 1025 | T | -8.019546  | 8.458824  | -11.941856 | -4.326407 |
| 1I2T | A | PRO | 1026 | T | -7.551248  | 8.920956  | -10.712737 | -3.874322 |
| 1I2T | A | ALA | 1027 | T | -7.508786  | 8.981753  | -10.705820 | -3.859357 |
| 1I2T | A | PHE | 1028 | T | -7.680735  | 9.540343  | -10.250910 | -3.703245 |
| 1I2T | A | ALA | 1029 | H | -7.675331  | 9.604345  | -10.192541 | -3.678126 |
| 1I2T | A | SER | 1030 | H | -7.586230  | 9.509564  | -10.304606 | -3.786023 |
| 1I2T | A | LYS | 1031 | H | -8.026677  | 10.034072 | -11.250887 | -4.281328 |
| 1I2T | A | ILE | 1032 | H | -8.134374  | 10.296072 | -11.259627 | -4.402085 |
| 1I2T | A | THR | 1033 | H | -8.139877  | 10.273512 | -11.287398 | -4.423429 |
| 1I2T | A | GLY | 1034 | H | -8.029283  | 10.238960 | -11.345784 | -4.483228 |
| 1I2T | A | MET | 1035 | H | -8.493443  | 11.569411 | -11.632896 | -4.697622 |
| 1I2T | A | LEU | 1036 | H | -8.592778  | 11.590322 | -11.492601 | -4.558950 |
| 1I2T | A | LEU | 1037 | H | -8.454612  | 10.352185 | -11.851637 | -4.400828 |
| 1I2T | A | GLU | 1038 | H | -7.386549  | 5.819146  | -11.717053 | -3.908220 |
| 1I2T | A | LEU | 1039 | C | -7.413882  | 5.386109  | -11.844025 | -3.863612 |
| 1I2T | A | SER | 1040 | C | -7.408815  | 5.353059  | -11.877861 | -3.863789 |
| 1I2T | A | PRO | 1041 | H | -7.416225  | 5.250289  | -11.892692 | -3.857232 |
| 1I2T | A | ALA | 1042 | H | -7.444270  | 5.135631  | -11.851215 | -3.849389 |
| 1I2T | A | GLN | 1043 | H | -8.996627  | 7.078248  | -13.832739 | -4.246359 |
| 1I2T | A | LEU | 1044 | H | -9.497607  | 9.159956  | -13.321650 | -4.367679 |
| 1I2T | A | LEU | 1045 | H | -9.578616  | 11.522231 | -12.076677 | -4.252096 |
| 1I2T | A | LEU | 1046 | H | -9.530016  | 11.616054 | -12.042225 | -4.268138 |
| 1I2T | A | LEU | 1047 | H | -9.515729  | 11.590206 | -12.109224 | -4.289059 |
| 1I2T | A | LEU | 1048 | H | -9.306735  | 10.072521 | -13.139225 | -4.477476 |
| 1I2T | A | ALA | 1049 | H | -8.951297  | 7.786886  | -14.184930 | -4.631609 |
| 1I2T | A | SER | 1050 | C | -9.107318  | 6.413144  | -15.226162 | -4.827037 |
| 1I2T | A | GLU | 1051 | H | -9.159474  | 5.951032  | -15.492537 | -4.875387 |
| 1I2T | A | ASP | 1052 | H | -9.090575  | 6.194971  | -15.306004 | -4.799714 |
| 1I2T | A | SER | 1053 | H | -9.227923  | 6.112822  | -15.236929 | -4.767506 |
| 1I2T | A | LEU | 1054 | H | -9.989503  | 8.841066  | -14.703110 | -4.638938 |
| 1I2T | A | ARG | 1055 | H | -10.123900 | 8.875144  | -14.396663 | -4.503246 |
| 1I2T | A | ALA | 1056 | H | -10.220036 | 8.693388  | -14.241342 | -4.357860 |
| 1I2T | A | ARG | 1057 | H | -11.413024 | 9.908919  | -16.248068 | -4.826890 |
| 1I2T | A | VAL | 1058 | H | -10.346186 | 14.038336 | -17.078734 | -8.292047 |
| 1I2T | A | ASP | 1059 | H | -8.942648  | 12.342021 | -16.418293 | -8.710640 |
| 1I2T | A | GLU | 1060 | H | -7.638333  | 11.855171 | -13.871019 | -7.874538 |
| 1I2T | A | ALA | 1061 | H | -6.738400  | 11.168388 | -12.080646 | -7.019477 |
| 1I2T | A | MET | 1062 | H | -5.402955  | 8.650787  | -10.362435 | -6.138235 |
| 1I2T | A | GLU | 1063 | H | -3.636001  | 6.445150  | -7.572138  | -4.937796 |
| 1I2T | A | LEU | 1064 | H | -2.830600  | 5.987809  | -6.308076  | -4.312609 |
| 1I2T | A | ILE | 1065 | H | -2.264122  | 5.128462  | -5.603365  | -3.772203 |
| 1I2T | A | ILE | 1066 | H | -1.459832  | 2.623027  | -5.087124  | -3.065595 |
| 1I2T | A | ALA | 1067 | H | -1.459832  | 2.623027  | -5.087124  | -3.065595 |
| 1I2T | A | HIS | 1068 | H | -1.459832  | 2.623027  | -5.087124  | -3.065595 |
| 1I2T | A | GLY | 1069 | C | -1.459832  | 2.623027  | -5.087124  | -3.065595 |
| 1I4M | A | GLY | 119  | C | -3.389287  | 5.061983  | -9.107608  | -4.912687 |
| 1I4M | A | ALA | 120  | C | -3.389287  | 5.061983  | -9.107608  | -4.912687 |
| 1I4M | A | VAL | 121  | C | -3.389287  | 5.061983  | -9.107608  | -4.912687 |
| 1I4M | A | VAL | 122  | T | -3.389287  | 5.061983  | -9.107608  | -4.912687 |
| 1I4M | A | GLY | 123  | T | -2.743306  | 4.914773  | -8.078189  | -4.963221 |
| 1I4M | A | GLY | 124  | T | -2.788552  | 4.975899  | -8.067973  | -5.044029 |
| 1I4M | A | LEU | 125  | T | -2.896896  | 5.063235  | -7.869352  | -5.044625 |
| 1I4M | A | GLY | 126  | T | -2.910260  | 5.007420  | -7.814540  | -5.024340 |
| 1I4M | A | GLY | 127  | T | -2.931701  | 4.928541  | -7.680576  | -4.953872 |
| 1I4M | A | TYR | 128  | T | -5.685947  | 10.758652 | -9.088791  | -5.544429 |
| 1I4M | A | MET | 129  | E | -6.510276  | 9.212576  | -10.067969 | -4.609452 |
| 1I4M | A | LEU | 130  | E | -6.315083  | 8.073985  | -10.175963 | -4.334858 |
| 1I4M | A | GLY | 131  | C | -6.020121  | 6.130235  | -10.437044 | -3.971986 |
| 1I4M | A | SER | 132  | C | -6.024193  | 6.050078  | -10.440991 | -3.952699 |
| 1I4M | A | ALA | 133  | C | -6.021269  | 6.034198  | -10.454366 | -3.948068 |
| 1I4M | A | MET | 134  | C | -6.207355  | 5.211935  | -10.787905 | -3.783435 |
| 1I4M | A | SER | 135  | C | -6.374265  | 4.835208  | -10.849840 | -3.658744 |
| 1I4M | A | ARG | 136  | C | -6.996949  | 8.064668  | -10.540149 | -3.766040 |
| 1I4M | A | PRO | 137  | C | -5.609856  | 8.589283  | -7.528119  | -3.534140 |
| 1I4M | A | ILE | 138  | C | -4.268118  | 7.984733  | -6.581326  | -3.898780 |
| 1I4M | A | ILE | 139  | C | -4.255719  | 7.979259  | -6.648544  | -3.912052 |
| 1I4M | A | HIS | 140  | C | -4.223518  | 7.936832  | -6.821470  | -3.959057 |
| 1I4M | A | PHE | 141  | T | -4.198662  | 7.949884  | -6.934423  | -3.999997 |
| 1I4M | A | GLY | 142  | T | -4.009190  | 7.026130  | -7.631927  | -4.231677 |
| 1I4M | A | SER | 143  | T | -4.520708  | 5.813258  | -9.235295  | -4.638099 |
| 1I4M | A | ASP | 144  | H | -4.543062  | 5.739634  | -9.209274  | -4.645702 |
| 1I4M | A | TYR | 145  | H | -4.601285  | 5.588425  | -9.134322  | -4.633781 |
| 1I4M | A | GLU | 146  | H | -4.656179  | 5.330614  | -9.087649  | -4.612445 |
| 1I4M | A | ASP | 147  | H | -7.899425  | 11.216578 | -14.900665 | -7.999922 |
| 1I4M | A | ARG | 148  | H | -10.193897 | 9.364668  | -16.712648 | -6.298934 |
| 1I4M | A | TYR | 149  | H | -13.623987 | 12.531088 | -22.036105 | -8.215516 |
| 1I4M | A | TYR | 150  | H | -15.559146 | 15.073526 | -22.207305 | -7.084088 |
| 1I4M | A | ARG | 151  | H | -13.261935 | 10.121822 | -19.524256 | -6.018704 |
| 1I4M | A | GLU | 152  | H | -13.257253 | 10.109126 | -19.538623 | -6.010819 |

|      |   |     |     |   |            |           |            |           |
|------|---|-----|-----|---|------------|-----------|------------|-----------|
| 1I4M | A | ASN | 153 | H | -13.231679 | 10.265330 | -19.568945 | -6.026293 |
| 1I4M | A | MET | 154 | G | -13.204194 | 10.459783 | -19.540979 | -6.012583 |
| 1I4M | A | HIS | 155 | G | -13.203344 | 10.444552 | -19.547609 | -6.009009 |
| 1I4M | A | ARG | 156 | G | -14.408703 | 13.810793 | -20.198303 | -6.096701 |
| 1I4M | A | TYR | 157 | C | -11.160660 | 13.925839 | -14.141025 | -5.546172 |
| 1I4M | A | PRO | 158 | C | -10.800596 | 15.105583 | -13.721794 | -5.648332 |
| 1I4M | A | ASN | 159 | C | -10.799445 | 15.118047 | -13.725994 | -5.650810 |
| 1I4M | A | GLN | 160 | C | -10.799555 | 15.118889 | -13.724492 | -5.650785 |
| 1I4M | A | VAL | 161 | C | -10.799693 | 15.119733 | -13.722656 | -5.650655 |
| 1I4M | A | TYR | 162 | E | -11.260968 | 16.535703 | -13.259555 | -5.775983 |
| 1I4M | A | TYR | 163 | E | -11.412046 | 12.914029 | -14.625924 | -5.136366 |
| 1I4M | A | ARG | 164 | C | -7.843972  | 7.323479  | -12.042912 | -4.533955 |
| 1I4M | A | PRO | 165 | C | -7.071070  | 7.933489  | -11.352975 | -4.675424 |
| 1I4M | A | MET | 166 | G | -6.834088  | 7.817177  | -11.398550 | -4.646652 |
| 1I4M | A | ASP | 167 | G | -6.821990  | 7.806939  | -11.461940 | -4.657654 |
| 1I4M | A | GLU | 168 | G | -6.817116  | 7.807361  | -11.489764 | -4.662319 |
| 1I4M | A | TYR | 169 | C | -6.839844  | 7.876648  | -11.505283 | -4.697625 |
| 1I4M | A | SER | 170 | C | -4.858241  | 4.051848  | -9.791200  | -4.391258 |
| 1I4M | A | ASN | 171 | C | -4.863862  | 4.020946  | -9.777606  | -4.390298 |
| 1I4M | A | GLN | 172 | H | -4.861764  | 4.040950  | -9.781690  | -4.391118 |
| 1I4M | A | ASN | 173 | H | -4.861844  | 4.040709  | -9.780862  | -4.390959 |
| 1I4M | A | ASN | 174 | H | -4.864880  | 4.022138  | -9.767952  | -4.389144 |
| 1I4M | A | PHE | 175 | H | -7.820409  | 9.111229  | -11.995159 | -4.819381 |
| 1I4M | A | VAL | 176 | H | -8.062720  | 9.263499  | -11.706898 | -4.726857 |
| 1I4M | A | HIS | 177 | H | -9.741079  | 8.804540  | -14.849379 | -4.864194 |
| 1I4M | A | ASP | 178 | H | -10.408808 | 6.767037  | -16.637848 | -4.651029 |
| 1I4M | A | CYS | 179 | H | -10.333774 | 7.204080  | -16.377251 | -4.636061 |
| 1I4M | A | VAL | 180 | H | -9.495194  | 8.546442  | -13.771410 | -4.247843 |
| 1I4M | A | ASN | 181 | H | -9.198652  | 9.295320  | -13.163116 | -4.289656 |
| 1I4M | A | ILE | 182 | H | -9.227156  | 9.461740  | -12.975245 | -4.267753 |
| 1I4M | A | THR | 183 | H | -9.230187  | 9.462073  | -12.956613 | -4.265365 |
| 1I4M | A | ILE | 184 | H | -9.232699  | 9.418742  | -12.974140 | -4.264317 |
| 1I4M | A | LYS | 185 | H | -9.621956  | 9.839261  | -13.065580 | -4.418794 |
| 1I4M | A | GLN | 186 | H | -10.273594 | 8.493853  | -15.435354 | -4.742321 |
| 1I4M | A | HIS | 187 | H | -7.573823  | 6.983825  | -11.280689 | -3.937757 |
| 1I4M | A | THR | 188 | H | -6.524569  | 6.279580  | -10.930691 | -4.131184 |
| 1I4M | A | VAL | 189 | H | -6.450060  | 6.225125  | -11.130389 | -4.154954 |
| 1I4M | A | THR | 190 | C | -5.756656  | 4.943586  | -10.972592 | -4.238015 |
| 1I4M | A | THR | 191 | C | -4.906689  | 4.429488  | -10.086806 | -4.321329 |
| 1I4M | A | THR | 192 | C | -4.404096  | 4.023149  | -9.866860  | -4.365488 |
| 1I4M | A | THR | 193 | C | -4.389037  | 3.979459  | -9.958406  | -4.399663 |
| 1I4M | A | LYS | 194 | G | -4.389143  | 3.985328  | -9.959906  | -4.403990 |
| 1I4M | A | GLY | 195 | G | -4.431269  | 3.957120  | -9.890060  | -4.413286 |
| 1I4M | A | GLU | 196 | G | -4.678834  | 3.795878  | -9.930705  | -4.447403 |
| 1I4M | A | ASN | 197 | G | -6.147988  | 4.374754  | -12.346330 | -5.046982 |
| 1I4M | A | PHE | 198 | C | -7.663346  | 8.028275  | -13.559557 | -5.794511 |
| 1I4M | A | THR | 199 | C | -7.207784  | 8.098013  | -11.643024 | -5.015068 |
| 1I4M | A | GLU | 200 | H | -7.147960  | 8.030417  | -11.805570 | -5.012213 |
| 1I4M | A | THR | 201 | H | -7.150621  | 7.980576  | -11.722039 | -4.934742 |
| 1I4M | A | ASP | 202 | H | -7.148042  | 7.986228  | -11.712292 | -4.920756 |
| 1I4M | A | VAL | 203 | H | -7.126218  | 8.005923  | -11.719994 | -4.899458 |
| 1I4M | A | LYS | 204 | H | -8.090415  | 8.492675  | -13.370022 | -5.018413 |
| 1I4M | A | MET | 205 | H | -8.411238  | 9.467012  | -13.305391 | -4.937161 |
| 1I4M | A | MET | 206 | H | -8.392854  | 9.535871  | -13.331194 | -4.946683 |
| 1I4M | A | GLU | 207 | H | -8.155539  | 8.557121  | -13.569975 | -4.887051 |
| 1I4M | A | ARG | 208 | H | -8.138984  | 7.437886  | -13.824336 | -4.651894 |
| 1I4M | A | VAL | 209 | H | -7.524911  | 6.178792  | -12.802954 | -4.317514 |
| 1I4M | A | VAL | 210 | H | -7.195878  | 6.149022  | -12.449384 | -4.281530 |
| 1I4M | A | GLU | 211 | H | -6.938078  | 6.000285  | -12.248500 | -4.230863 |
| 1I4M | A | GLN | 212 | H | -6.853051  | 6.138488  | -12.167928 | -4.240204 |
| 1I4M | A | MET | 213 | H | -6.866694  | 6.156343  | -12.175835 | -4.265340 |
| 1I4M | A | CYS | 214 | H | -7.009495  | 6.322644  | -12.200801 | -4.328048 |
| 1I4M | A | ILE | 215 | H | -7.230911  | 6.410594  | -12.361003 | -4.411374 |
| 1I4M | A | THR | 216 | H | -7.750659  | 7.369034  | -13.135031 | -4.898568 |
| 1I4M | A | GLN | 217 | H | -8.605179  | 8.827802  | -16.986602 | -6.995707 |
| 1I4M | A | TYR | 218 | H | -8.565313  | 9.663047  | -17.702490 | -7.964235 |
| 1I4M | A | GLU | 219 | H | -8.062863  | 9.267730  | -16.106664 | -7.447988 |
| 1I4M | A | ARG | 220 | H | -7.224780  | 7.981871  | -13.779480 | -6.282503 |
| 1I4M | A | GLU | 221 | H | -6.013554  | 6.462497  | -11.371455 | -5.223597 |
| 1I4M | A | SER | 222 | H | -5.069028  | 5.817291  | -9.330820  | -4.251871 |
| 1I4M | A | GLN | 223 | H | -3.420389  | 4.730209  | -6.196543  | -3.185948 |
| 1I4M | A | ALA | 224 | C | -3.420389  | 4.730209  | -6.196543  | -3.185948 |
| 1I4M | A | TYR | 225 | H | -3.420389  | 4.730209  | -6.196543  | -3.185948 |
| 1I4M | A | TYR | 226 | C | -3.420389  | 4.730209  | -6.196543  | -3.185948 |
| 1I71 | A | ASP | 0   | C | -9.603302  | 10.629815 | -15.703979 | -6.526285 |
| 1I71 | A | CYS | 1   | E | -9.603302  | 10.629815 | -15.703979 | -6.526285 |
| 1I71 | A | TYR | 2   | E | -9.603302  | 10.629815 | -15.703979 | -6.526285 |
| 1I71 | A | HIS | 3   | T | -9.603302  | 10.629815 | -15.703979 | -6.526285 |
| 1I71 | A | GLY | 4   | T | -9.547593  | 7.093802  | -17.282867 | -6.407223 |
| 1I71 | A | ASP | 5   | T | -9.776317  | 4.555739  | -17.284803 | -5.430467 |
| 1I71 | A | GLY | 6   | T | -9.843583  | 3.854307  | -16.947791 | -4.991824 |

|      |   |     |    |   |            |           |            |           |
|------|---|-----|----|---|------------|-----------|------------|-----------|
| 1I71 | A | GLN | 7  | T | -9.848444  | 3.792897  | -16.902240 | -4.952144 |
| 1I71 | A | SER | 8  | T | -9.848060  | 3.795882  | -16.902852 | -4.951035 |
| 1I71 | A | TYR | 9  | T | -13.392041 | 9.279560  | -18.044893 | -3.656376 |
| 1I71 | A | ARG | 10 | C | -13.163340 | 9.558410  | -17.015717 | -3.342208 |
| 1I71 | A | GLY | 11 | C | -10.272617 | 10.013715 | -11.199027 | -2.770500 |
| 1I71 | A | SER | 12 | C | -10.104467 | 10.495776 | -11.243025 | -2.833010 |
| 1I71 | A | PHE | 13 | C | -10.060428 | 10.650523 | -11.416034 | -2.926376 |
| 1I71 | A | SER | 14 | C | -8.894946  | 9.727700  | -12.360116 | -4.524641 |
| 1I71 | A | THR | 15 | B | -7.577439  | 7.646407  | -9.362012  | -2.891542 |
| 1I71 | A | THR | 16 | B | -7.519743  | 7.673823  | -9.482345  | -2.908921 |
| 1I71 | A | VAL | 17 | T | -7.197336  | 7.468349  | -9.519588  | -2.902600 |
| 1I71 | A | THR | 18 | T | -7.137331  | 7.438315  | -9.861249  | -3.056792 |
| 1I71 | A | GLY | 19 | T | -7.163843  | 7.340319  | -9.742670  | -2.978438 |
| 1I71 | A | ARG | 20 | C | -7.511332  | 7.297494  | -10.336234 | -3.205800 |
| 1I71 | A | THR | 21 | B | -7.574337  | 7.203507  | -10.294786 | -3.223312 |
| 1I71 | A | CYS | 22 | B | -8.517403  | 7.197977  | -13.095130 | -4.510015 |
| 1I71 | A | GLN | 23 | C | -11.611705 | 9.433858  | -17.672020 | -6.087053 |
| 1I71 | A | SER | 24 | T | -12.726850 | 10.926566 | -16.729852 | -4.801516 |
| 1I71 | A | TRP | 25 | T | -11.463612 | 10.438482 | -13.000266 | -2.982150 |
| 1I71 | A | SER | 26 | T | -8.073746  | 7.113234  | -9.030505  | -2.114827 |
| 1I71 | A | SER | 27 | T | -8.055292  | 7.167424  | -9.107887  | -2.132813 |
| 1I71 | A | MET | 28 | T | -8.033695  | 7.248113  | -9.252760  | -2.199506 |
| 1I71 | A | THR | 29 | T | -8.027715  | 7.283177  | -9.305271  | -2.228718 |
| 1I71 | A | PRO | 30 | T | -8.029164  | 7.275896  | -9.297899  | -2.227607 |
| 1I71 | A | HIS | 31 | T | -9.559712  | 9.400890  | -12.730977 | -3.643034 |
| 1I71 | A | TRP | 32 | T | -9.849842  | 9.737821  | -13.483328 | -4.240602 |
| 1I71 | A | HIS | 33 | C | -10.695402 | 10.852703 | -14.603519 | -5.038148 |
| 1I71 | A | GLN | 34 | C | -9.439875  | 11.315694 | -12.655182 | -5.078505 |
| 1I71 | A | ARG | 35 | C | -9.232013  | 11.064547 | -12.012547 | -4.408005 |
| 1I71 | A | THR | 36 | T | -8.959315  | 11.581578 | -11.164995 | -3.969380 |
| 1I71 | A | THR | 37 | T | -8.803421  | 11.230649 | -11.028258 | -3.704085 |
| 1I71 | A | GLU | 38 | T | -8.622699  | 10.587196 | -11.464566 | -3.775780 |
| 1I71 | A | TYR | 39 | T | -8.477051  | 10.169481 | -11.704729 | -4.005846 |
| 1I71 | A | TYR | 40 | T | -8.158735  | 8.572400  | -11.240024 | -3.453878 |
| 1I71 | A | PRO | 41 | T | -6.565752  | 6.884556  | -7.976913  | -2.539107 |
| 1I71 | A | ASN | 42 | T | -6.462136  | 7.100829  | -8.131923  | -2.622402 |
| 1I71 | A | GLY | 43 | T | -6.421213  | 7.279452  | -8.252428  | -2.702219 |
| 1I71 | A | GLY | 44 | T | -6.379708  | 7.488352  | -8.398460  | -2.843027 |
| 1I71 | A | LEU | 45 | T | -6.393284  | 7.508009  | -8.347922  | -2.846681 |
| 1I71 | A | THR | 46 | T | -7.109366  | 9.169849  | -9.748301  | -3.713969 |
| 1I71 | A | ARG | 47 | T | -7.510203  | 10.028472 | -10.484385 | -4.354238 |
| 1I71 | A | ASN | 48 | T | -7.874987  | 10.315526 | -10.743654 | -4.798264 |
| 1I71 | A | TYR | 49 | T | -10.870542 | 12.875026 | -11.293627 | -3.171793 |
| 1I71 | A | CYS | 50 | C | -11.784319 | 10.148814 | -13.956792 | -3.476961 |
| 1I71 | A | ARG | 51 | B | -14.950440 | 10.344496 | -18.199398 | -3.493509 |
| 1I71 | A | ASN | 52 | T | -11.473258 | 9.117409  | -14.012737 | -3.341391 |
| 1I71 | A | PRO | 53 | T | -9.396047  | 8.537017  | -12.516930 | -3.677359 |
| 1I71 | A | ASP | 54 | T | -9.340488  | 8.530107  | -12.794463 | -3.791303 |
| 1I71 | A | ALA | 55 | T | -9.300321  | 8.724913  | -12.644384 | -3.691692 |
| 1I71 | A | GLU | 56 | C | -9.300292  | 8.725816  | -12.644098 | -3.691622 |
| 1I71 | A | ILE | 57 | C | -9.315497  | 8.716631  | -12.608813 | -3.700689 |
| 1I71 | A | ARG | 58 | C | -10.426541 | 9.807818  | -13.371907 | -3.772117 |
| 1I71 | A | PRO | 59 | C | -10.908873 | 11.567324 | -10.545532 | -2.295459 |
| 1I71 | A | TRP | 60 | E | -13.627654 | 18.025805 | -14.581401 | -4.645748 |
| 1I71 | A | CYS | 61 | E | -13.539680 | 16.709977 | -15.307045 | -4.736881 |
| 1I71 | A | TYR | 62 | E | -12.760495 | 13.654752 | -14.484262 | -3.866135 |
| 1I71 | A | THR | 63 | B | -9.033980  | 7.683312  | -12.442725 | -3.695895 |
| 1I71 | A | MET | 64 | C | -6.978309  | 6.344952  | -10.804046 | -4.053270 |
| 1I71 | A | ASP | 65 | T | -6.975373  | 6.345472  | -10.809058 | -4.043215 |
| 1I71 | A | PRO | 66 | T | -6.965416  | 6.414421  | -10.775461 | -4.009261 |
| 1I71 | A | SER | 67 | T | -6.965126  | 6.416796  | -10.776104 | -4.008726 |
| 1I71 | A | VAL | 68 | T | -6.983390  | 6.377763  | -10.724128 | -4.018565 |
| 1I71 | A | ARG | 69 | T | -9.223503  | 9.631658  | -9.560259  | -2.040620 |
| 1I71 | A | TRP | 70 | E | -9.369670  | 10.534847 | -8.931386  | -2.049434 |
| 1I71 | A | GLU | 71 | E | -11.339615 | 11.964141 | -12.649706 | -3.228361 |
| 1I71 | A | TYR | 72 | E | -11.875722 | 14.228270 | -14.122479 | -4.322264 |
| 1I71 | A | CYS | 73 | B | -9.039596  | 10.214222 | -13.607227 | -5.687467 |
| 1I71 | A | ASN | 74 | T | -7.074107  | 9.138124  | -10.839153 | -5.265949 |
| 1I71 | A | LEU | 75 | T | -6.133091  | 7.685573  | -9.553834  | -4.423759 |
| 1I71 | A | THR | 76 | E | -3.855190  | 3.198573  | -7.199504  | -3.297540 |
| 1I71 | A | GLN | 77 | E | -3.032348  | 2.597842  | -6.142434  | -2.757112 |
| 1I71 | A | CYS | 78 | C | -1.601837  | 0.704693  | -3.786721  | -1.598437 |
| 1I71 | A | PRO | 79 | C | 1.346211   | 0.172233  | -1.413033  | -2.350798 |
| 1I71 | A | VAL | 80 | C | 1.346211   | 0.172233  | -1.413033  | -2.350798 |
| 1I71 | A | MET | 81 | C | 1.346211   | 0.172233  | -1.413033  | -2.350798 |
| 1I71 | A | GLU | 82 | C | 1.346211   | 0.172233  | -1.413033  | -2.350798 |
| 1I76 | A | MET | 80 | C | -6.296794  | 9.185948  | -10.523908 | -5.157845 |
| 1I76 | A | LEU | 81 | B | -6.296794  | 9.185948  | -10.523908 | -5.157845 |
| 1I76 | A | THR | 82 | T | -6.296794  | 9.185948  | -10.523908 | -5.157845 |
| 1I76 | A | PRO | 83 | T | -6.296794  | 9.185948  | -10.523908 | -5.157845 |
| 1I76 | A | GLY | 84 | T | -6.322553  | 9.208620  | -10.536387 | -5.233415 |

|      |   |     |     |   |            |           |            |           |
|------|---|-----|-----|---|------------|-----------|------------|-----------|
| 1I76 | A | ASN | 85  | T | -6.436901  | 9.271661  | -10.527107 | -5.382802 |
| 1I76 | A | PRO | 86  | C | -8.037550  | 10.636396 | -12.747670 | -6.016534 |
| 1I76 | A | LYS | 87  | C | -9.476165  | 13.133960 | -13.886638 | -5.941347 |
| 1I76 | A | TRP | 88  | T | -9.538303  | 12.801387 | -13.108619 | -5.129710 |
| 1I76 | A | GLU | 89  | T | -8.565665  | 10.444321 | -11.951843 | -4.729920 |
| 1I76 | A | ARG | 90  | T | -8.553279  | 10.456747 | -11.974510 | -4.726589 |
| 1I76 | A | THR | 91  | T | -8.550392  | 10.495049 | -11.974971 | -4.730879 |
| 1I76 | A | ASN | 92  | E | -8.568471  | 10.414280 | -11.935475 | -4.721893 |
| 1I76 | A | LEU | 93  | E | -8.603693  | 10.312878 | -11.848887 | -4.701790 |
| 1I76 | A | THR | 94  | E | -10.395210 | 12.954217 | -13.186360 | -4.908832 |
| 1I76 | A | TYR | 95  | E | -11.541752 | 17.309953 | -12.719777 | -5.417098 |
| 1I76 | A | ARG | 96  | E | -14.474439 | 16.021535 | -18.270982 | -5.759978 |
| 1I76 | A | ILE | 97  | E | -11.685495 | 16.097805 | -13.932166 | -5.690114 |
| 1I76 | A | ARG | 98  | C | -10.533255 | 12.685372 | -14.196016 | -5.435978 |
| 1I76 | A | ASN | 99  | C | -10.179293 | 11.562177 | -14.634666 | -5.378562 |
| 1I76 | A | TYR | 100 | C | -9.504864  | 12.892147 | -12.780477 | -5.158590 |
| 1I76 | A | THR | 101 | T | -8.909999  | 10.122737 | -13.121796 | -4.842066 |
| 1I76 | A | PRO | 102 | T | -8.660905  | 9.233684  | -13.397627 | -4.779449 |
| 1I76 | A | GLN | 103 | T | -8.668120  | 9.103191  | -13.429099 | -4.759556 |
| 1I76 | A | LEU | 104 | T | -8.407883  | 8.644333  | -13.335893 | -4.686582 |
| 1I76 | A | SER | 105 | T | -7.958327  | 8.298917  | -12.563604 | -4.518023 |
| 1I76 | A | GLU | 106 | H | -8.016781  | 8.336558  | -12.516520 | -4.523351 |
| 1I76 | A | ALA | 107 | H | -8.090302  | 8.425957  | -12.333858 | -4.503394 |
| 1I76 | A | GLU | 108 | H | -8.095661  | 8.428575  | -12.301304 | -4.499896 |
| 1I76 | A | VAL | 109 | H | -8.244089  | 8.577226  | -12.020576 | -4.470993 |
| 1I76 | A | GLU | 110 | H | -9.925342  | 10.355316 | -14.247045 | -5.155163 |
| 1I76 | A | ARG | 111 | H | -9.870422  | 10.631044 | -12.595536 | -4.058049 |
| 1I76 | A | ALA | 112 | H | -9.669381  | 11.054754 | -12.549518 | -4.140156 |
| 1I76 | A | ILE | 113 | H | -9.651459  | 11.219935 | -12.539803 | -4.159138 |
| 1I76 | A | LYS | 114 | H | -9.635470  | 11.210914 | -12.620902 | -4.195474 |
| 1I76 | A | ASP | 115 | H | -9.636666  | 11.239027 | -12.603206 | -4.196733 |
| 1I76 | A | ALA | 116 | H | -10.215032 | 12.478693 | -12.946488 | -4.500420 |
| 1I76 | A | PHE | 117 | H | -11.074909 | 14.115269 | -13.818328 | -4.892120 |
| 1I76 | A | GLU | 118 | H | -11.197807 | 13.073673 | -14.450266 | -4.874494 |
| 1I76 | A | LEU | 119 | H | -11.702711 | 14.335083 | -14.256591 | -4.599228 |
| 1I76 | A | TRP | 120 | H | -11.102849 | 13.241787 | -14.006978 | -4.730480 |
| 1I76 | A | SER | 121 | H | -9.764026  | 8.116866  | -14.014188 | -4.204121 |
| 1I76 | A | VAL | 122 | H | -8.783830  | 10.802559 | -11.325646 | -4.102162 |
| 1I76 | A | ALA | 123 | C | -8.699790  | 10.854177 | -11.403415 | -4.089427 |
| 1I76 | A | SER | 124 | C | -8.628954  | 11.413712 | -11.263902 | -4.134973 |
| 1I76 | A | PRO | 125 | C | -8.510229  | 12.165827 | -10.936216 | -4.168516 |
| 1I76 | A | LEU | 126 | C | -8.571516  | 12.766315 | -10.582377 | -4.180491 |
| 1I76 | A | ILE | 127 | E | -9.048210  | 14.486204 | -10.508922 | -4.322124 |
| 1I76 | A | PHE | 128 | E | -9.152231  | 15.430534 | -10.238450 | -4.457135 |
| 1I76 | A | THR | 129 | E | -8.777464  | 10.658226 | -12.260589 | -4.552738 |
| 1I76 | A | ARG | 130 | E | -8.215220  | 6.831591  | -13.711745 | -4.815691 |
| 1I76 | A | ILE | 131 | C | -7.889137  | 5.719630  | -14.313740 | -4.940563 |
| 1I76 | A | SER | 132 | C | -7.649329  | 5.192592  | -14.510662 | -4.958566 |
| 1I76 | A | GLN | 133 | C | -7.620135  | 5.111381  | -14.622393 | -4.977769 |
| 1I76 | A | GLY | 134 | C | -7.639108  | 5.058672  | -14.684506 | -5.008164 |
| 1I76 | A | GLU | 135 | C | -7.829665  | 4.642033  | -15.007136 | -5.057058 |
| 1I76 | A | ALA | 136 | T | -8.118482  | 4.857608  | -14.941729 | -5.023915 |
| 1I76 | A | ASP | 137 | T | -8.917641  | 6.694716  | -15.092753 | -5.115946 |
| 1I76 | A | ILE | 138 | E | -9.323672  | 8.384340  | -14.005710 | -4.951324 |
| 1I76 | A | ASN | 139 | E | -11.947219 | 11.439728 | -16.635334 | -5.261706 |
| 1I76 | A | ILE | 140 | E | -12.690418 | 16.549654 | -15.235678 | -5.165576 |
| 1I76 | A | ALA | 141 | E | -12.906265 | 17.756688 | -14.747604 | -5.179451 |
| 1I76 | A | PHE | 142 | E | -12.812844 | 18.478086 | -14.378292 | -5.294466 |
| 1I76 | A | TYR | 143 | E | -11.112604 | 13.312753 | -15.346929 | -5.874396 |
| 1I76 | A | GLN | 144 | T | -7.317484  | 8.653635  | -11.446344 | -5.103382 |
| 1I76 | A | ARG | 145 | T | -7.261837  | 8.569194  | -11.657396 | -5.110138 |
| 1I76 | A | ASP | 146 | T | -4.648684  | 5.455782  | -9.721203  | -5.103240 |
| 1I76 | A | HIS | 147 | T | -4.388962  | 5.928505  | -9.568519  | -5.064453 |
| 1I76 | A | GLY | 148 | C | -3.632448  | 5.157544  | -8.419697  | -4.553642 |
| 1I76 | A | ASP | 149 | C | -3.632754  | 5.158862  | -8.415605  | -4.552414 |
| 1I76 | A | ASN | 150 | C | -3.632515  | 5.161169  | -8.416010  | -4.552210 |
| 1I76 | A | SER | 151 | C | -3.748912  | 5.101809  | -8.131715  | -4.429189 |
| 1I76 | A | PRO | 152 | C | -3.825110  | 4.869343  | -7.970529  | -4.350307 |
| 1I76 | A | PHE | 153 | C | -7.255980  | 10.500726 | -10.232312 | -4.472162 |
| 1I76 | A | ASP | 154 | C | -6.668199  | 4.304197  | -12.888037 | -4.840907 |
| 1I76 | A | GLY | 155 | C | -5.554014  | 3.626285  | -11.205715 | -4.396637 |
| 1I76 | A | PRO | 156 | C | -5.463549  | 4.004785  | -11.096848 | -4.353196 |
| 1I76 | A | ASN | 157 | T | -5.367957  | 4.623340  | -10.839063 | -4.323542 |
| 1I76 | A | GLY | 158 | T | -5.336298  | 4.914958  | -10.755494 | -4.322407 |
| 1I76 | A | ILE | 159 | T | -5.392503  | 5.076064  | -10.512491 | -4.263565 |
| 1I76 | A | LEU | 160 | T | -6.026360  | 7.871251  | -9.766496  | -4.158462 |
| 1I76 | A | ALA | 161 | E | -6.297998  | 8.773483  | -9.369310  | -4.196032 |
| 1I76 | A | HIS | 162 | E | -7.058095  | 10.321587 | -9.313656  | -4.297443 |
| 1I76 | A | ALA | 163 | E | -8.840000  | 12.965006 | -10.392839 | -4.131152 |
| 1I76 | A | PHE | 164 | E | -9.293043  | 12.956785 | -11.719981 | -4.510401 |
| 1I76 | A | GLN | 165 | C | -6.811790  | 6.786372  | -10.937482 | -4.418013 |



|      |   |     |     |   |            |           |            |           |
|------|---|-----|-----|---|------------|-----------|------------|-----------|
| 1I76 | A | PRO | 166 | C | -5.113462  | 6.001771  | -8.633327  | -3.926643 |
| 1I76 | A | GLY | 167 | C | -3.908514  | 3.614623  | -8.932783  | -4.267980 |
| 1I76 | A | GLN | 168 | T | -3.773648  | 3.795164  | -9.000353  | -4.277526 |
| 1I76 | A | GLY | 169 | T | -3.773252  | 3.796567  | -9.003353  | -4.277955 |
| 1I76 | A | ILE | 170 | T | -3.776639  | 3.780214  | -8.992414  | -4.277080 |
| 1I76 | A | GLY | 171 | T | -3.838456  | 3.539923  | -9.044188  | -4.317434 |
| 1I76 | A | GLY | 172 | T | -4.715664  | 4.503032  | -9.257854  | -4.305411 |
| 1I76 | A | ASP | 173 | E | -7.947214  | 6.740292  | -13.231137 | -4.798825 |
| 1I76 | A | ALA | 174 | E | -8.950852  | 8.860885  | -12.684292 | -4.452413 |
| 1I76 | A | HIS | 175 | E | -11.078435 | 9.247837  | -16.117022 | -5.021934 |
| 1I76 | A | PHE | 176 | E | -12.595845 | 14.674496 | -15.858390 | -5.115280 |
| 1I76 | A | ASP | 177 | E | -11.801121 | 10.546036 | -17.174680 | -5.618949 |
| 1I76 | A | ALA | 178 | T | -11.745960 | 10.912393 | -17.136236 | -5.646807 |
| 1I76 | A | GLU | 179 | T | -11.757829 | 10.796843 | -17.228619 | -5.693463 |
| 1I76 | A | GLU | 180 | T | -11.759399 | 10.760175 | -17.255818 | -5.703348 |
| 1I76 | A | THR | 181 | C | -11.130594 | 11.839817 | -15.748655 | -5.468442 |
| 1I76 | A | TRP | 182 | E | -10.836807 | 12.784590 | -14.623102 | -5.276078 |
| 1I76 | A | THR | 183 | E | -7.881819  | 6.402933  | -12.570692 | -4.477669 |
| 1I76 | A | ASN | 184 | C | -6.531920  | 6.054621  | -11.394713 | -4.607752 |
| 1I76 | A | THR | 185 | C | -6.522198  | 6.119249  | -11.410119 | -4.609812 |
| 1I76 | A | SER | 186 | C | -6.522223  | 6.118692  | -11.410156 | -4.609783 |
| 1I76 | A | ALA | 187 | T | -6.522448  | 6.116112  | -11.409107 | -4.609566 |
| 1I76 | A | ASN | 188 | T | -6.584974  | 6.088926  | -11.281290 | -4.624820 |
| 1I76 | A | TYR | 189 | E | -8.953100  | 10.045660 | -12.393778 | -4.743766 |
| 1I76 | A | ASN | 190 | E | -11.389579 | 12.116603 | -15.502301 | -5.324980 |
| 1I76 | A | LEU | 191 | H | -11.690719 | 19.857342 | -10.790244 | -4.414775 |
| 1I76 | A | PHE | 192 | H | -11.157285 | 18.763178 | -10.404469 | -4.111183 |
| 1I76 | A | LEU | 193 | H | -10.860299 | 16.924734 | -11.168311 | -4.047963 |
| 1I76 | A | VAL | 194 | H | -10.757404 | 16.284372 | -11.616903 | -4.089646 |
| 1I76 | A | ALA | 195 | H | -10.772263 | 16.162598 | -11.620354 | -4.068334 |
| 1I76 | A | ALA | 196 | H | -10.870835 | 15.333369 | -12.009367 | -4.056460 |
| 1I76 | A | HIS | 197 | H | -11.157254 | 13.777857 | -12.989627 | -4.106227 |
| 1I76 | A | GLU | 198 | H | -11.779009 | 13.172362 | -14.211094 | -4.398647 |
| 1I76 | A | PHE | 199 | H | -12.965267 | 15.531019 | -16.108995 | -5.157529 |
| 1I76 | A | GLY | 200 | H | -12.432085 | 12.589526 | -16.765934 | -5.196073 |
| 1I76 | A | HIS | 201 | H | -12.504157 | 12.287076 | -16.906672 | -5.186212 |
| 1I76 | A | SER | 202 | H | -12.225481 | 12.754330 | -16.276251 | -4.979264 |
| 1I76 | A | LEU | 203 | H | -11.284863 | 13.928769 | -13.666449 | -4.604386 |
| 1I76 | A | GLY | 204 | C | -11.083135 | 13.233865 | -14.106373 | -4.654987 |
| 1I76 | A | LEU | 205 | B | -10.595223 | 12.055543 | -13.715035 | -4.381557 |
| 1I76 | A | ALA | 206 | C | -8.970176  | 9.253317  | -12.461961 | -4.322301 |
| 1I76 | A | HIS | 207 | C | -8.318388  | 8.301581  | -12.380859 | -4.265632 |
| 1I76 | A | SER | 208 | C | -6.762348  | 5.324485  | -11.718396 | -4.338370 |
| 1I76 | A | SER | 209 | C | -5.206452  | 5.909806  | -8.932817  | -3.994985 |
| 1I76 | A | ASP | 210 | T | -5.182958  | 6.027423  | -8.972488  | -4.006730 |
| 1I76 | A | PRO | 211 | T | -5.183517  | 6.025965  | -8.969248  | -4.006652 |
| 1I76 | A | GLY | 212 | T | -5.185506  | 6.019985  | -8.957912  | -4.005883 |
| 1I76 | A | ALA | 213 | T | -5.225224  | 6.083959  | -8.769888  | -3.982352 |
| 1I76 | A | LEU | 214 | T | -7.095495  | 8.986662  | -10.000127 | -4.302964 |
| 1I76 | A | MET | 215 | T | -9.426646  | 12.094203 | -12.393789 | -4.745634 |
| 1I76 | A | TYR | 216 | T | -7.988220  | 12.887036 | -9.413775  | -4.543119 |
| 1I76 | A | PRO | 217 | C | -7.640252  | 13.689349 | -9.227575  | -4.683473 |
| 1I76 | A | ASN | 218 | C | -7.611171  | 13.714899 | -9.300779  | -4.687502 |
| 1I76 | A | TYR | 219 | C | -7.604573  | 13.719828 | -9.321387  | -4.687169 |
| 1I76 | A | ALA | 220 | C | -7.467893  | 13.415144 | -9.471756  | -4.641023 |
| 1I76 | A | PHE | 221 | C | -7.657488  | 13.351592 | -9.799987  | -4.666708 |
| 1I76 | A | ARG | 222 | C | -6.469874  | 7.368042  | -10.076903 | -4.175255 |
| 1I76 | A | GLU | 223 | C | -5.912909  | 8.792646  | -9.378890  | -4.508912 |
| 1I76 | A | THR | 224 | T | -5.806181  | 8.958999  | -9.375775  | -4.496551 |
| 1I76 | A | SER | 225 | T | -5.790364  | 9.031610  | -9.360032  | -4.489316 |
| 1I76 | A | ASN | 226 | T | -5.793477  | 9.024967  | -9.350844  | -4.489182 |
| 1I76 | A | TYR | 227 | T | -6.001208  | 9.883665  | -9.059402  | -4.631795 |
| 1I76 | A | SER | 228 | C | -6.734557  | 10.270948 | -9.361129  | -4.407902 |
| 1I76 | A | LEU | 229 | C | -7.668458  | 11.999419 | -9.333492  | -4.304754 |
| 1I76 | A | PRO | 230 | C | -9.156650  | 13.063270 | -11.042311 | -4.336985 |
| 1I76 | A | GLN | 231 | H | -9.869753  | 10.749959 | -13.846696 | -4.501481 |
| 1I76 | A | ASP | 232 | H | -10.026124 | 9.407443  | -14.711642 | -4.584954 |
| 1I76 | A | ASP | 233 | H | -10.105740 | 9.784718  | -15.011359 | -4.873201 |
| 1I76 | A | ILE | 234 | H | -9.904067  | 9.964500  | -14.725658 | -4.799322 |
| 1I76 | A | ASP | 235 | H | -9.946462  | 10.056719 | -14.654060 | -4.831488 |
| 1I76 | A | GLY | 236 | H | -10.179489 | 11.199325 | -14.163993 | -4.840572 |
| 1I76 | A | ILE | 237 | H | -10.164530 | 11.737157 | -13.963160 | -4.891933 |
| 1I76 | A | GLN | 238 | H | -10.190633 | 12.636963 | -13.596238 | -4.945149 |
| 1I76 | A | ALA | 239 | H | -9.247345  | 12.917652 | -10.718106 | -4.135448 |
| 1I76 | A | ILE | 240 | H | -9.247345  | 12.917652 | -10.718106 | -4.135448 |
| 1I76 | A | TYR | 241 | H | -9.247345  | 12.917652 | -10.718106 | -4.135448 |
| 1I76 | A | GLY | 242 | C | -9.247345  | 12.917652 | -10.718106 | -4.135448 |
| 1IAM | A | GLN | 1   | C | -7.933662  | 9.068920  | -10.935529 | -4.187845 |
| 1IAM | A | THR | 2   | E | -7.933662  | 9.068920  | -10.935529 | -4.187845 |
| 1IAM | A | SER | 3   | E | -7.933662  | 9.068920  | -10.935529 | -4.187845 |
| 1IAM | A | VAL | 4   | E | -7.933662  | 9.068920  | -10.935529 | -4.187845 |

|      |   |     |    |   |            |           |            |           |
|------|---|-----|----|---|------------|-----------|------------|-----------|
| LIAM | A | SER | 5  | E | -9.295493  | 8.980712  | -12.879655 | -3.977689 |
| LIAM | A | PRO | 6  | T | -8.235209  | 11.615900 | -9.759047  | -3.882061 |
| LIAM | A | SER | 7  | T | -8.093709  | 12.261284 | -9.613127  | -3.920391 |
| LIAM | A | LYS | 8  | E | -7.803721  | 13.376358 | -8.984584  | -3.966401 |
| LIAM | A | VAL | 9  | E | -7.797256  | 13.406346 | -8.999004  | -3.968290 |
| LIAM | A | ILE | 10 | E | -7.805740  | 13.717409 | -8.885690  | -4.014806 |
| LIAM | A | LEU | 11 | E | -8.073956  | 14.427459 | -8.973370  | -4.147649 |
| LIAM | A | PRO | 12 | E | -7.878834  | 11.544061 | -10.696605 | -4.498195 |
| LIAM | A | ARG | 13 | T | -8.157650  | 8.828858  | -12.889845 | -4.871239 |
| LIAM | A | GLY | 14 | T | -6.597216  | 8.694349  | -9.760204  | -4.353241 |
| LIAM | A | GLY | 15 | E | -6.504460  | 9.073868  | -9.621283  | -4.288264 |
| LIAM | A | SER | 16 | E | -6.491119  | 9.211258  | -9.577709  | -4.279111 |
| LIAM | A | VAL | 17 | E | -6.512705  | 9.294698  | -9.436599  | -4.250485 |
| LIAM | A | LEU | 18 | E | -6.516045  | 9.294241  | -9.413358  | -4.246111 |
| LIAM | A | VAL | 19 | E | -7.500533  | 11.858664 | -8.972264  | -3.963169 |
| LIAM | A | THR | 20 | E | -8.449244  | 13.635663 | -9.540173  | -4.141721 |
| LIAM | A | CYS | 21 | E | -9.365155  | 12.438353 | -12.029384 | -4.480178 |
| LIAM | A | SER | 22 | E | -9.125779  | 7.149362  | -15.206795 | -5.165240 |
| LIAM | A | THR | 23 | E | -7.133044  | 5.063190  | -12.846538 | -4.822561 |
| LIAM | A | SER | 24 | C | -6.283633  | 5.475597  | -11.313121 | -4.380858 |
| LIAM | A | CYS | 25 | T | -5.837462  | 5.618629  | -10.950957 | -4.389639 |
| LIAM | A | ASP | 26 | T | -5.554938  | 6.112528  | -10.382301 | -4.261143 |
| LIAM | A | GLN | 27 | T | -5.544691  | 6.207572  | -10.360456 | -4.258532 |
| LIAM | A | PRO | 28 | T | -5.565996  | 6.446601  | -10.172979 | -4.226359 |
| LIAM | A | LYS | 29 | T | -5.715480  | 6.723430  | -9.982602  | -4.224020 |
| LIAM | A | LEU | 30 | E | -6.048901  | 7.466947  | -9.494178  | -4.093086 |
| LIAM | A | LEU | 31 | E | -7.257190  | 11.313651 | -9.820914  | -4.408754 |
| LIAM | A | GLY | 32 | E | -6.601120  | 9.730295  | -9.988904  | -4.763124 |
| LIAM | A | ILE | 33 | E | -6.008043  | 11.748995 | -8.179241  | -4.758883 |
| LIAM | A | GLU | 34 | E | -5.470440  | 10.176335 | -8.270511  | -4.572167 |
| LIAM | A | THR | 35 | C | -5.160645  | 9.998950  | -8.153413  | -4.543011 |
| LIAM | A | PRO | 36 | C | -5.159914  | 9.991505  | -8.160961  | -4.542580 |
| LIAM | A | LEU | 37 | C | -5.202021  | 10.045297 | -8.024559  | -4.521168 |
| LIAM | A | PRO | 38 | C | -5.319123  | 9.453729  | -8.169525  | -4.476482 |
| LIAM | A | LYS | 39 | E | -5.681456  | 9.719715  | -8.074391  | -4.508212 |
| LIAM | A | LYS | 40 | E | -7.025536  | 8.885309  | -10.768604 | -4.601592 |
| LIAM | A | GLU | 41 | E | -5.522592  | 9.362571  | -7.804056  | -4.196289 |
| LIAM | A | LEU | 42 | E | -4.884481  | 7.953756  | -7.839279  | -4.024812 |
| LIAM | A | LEU | 43 | E | -4.076815  | 6.301582  | -7.722755  | -4.054064 |
| LIAM | A | LEU | 44 | T | -4.070267  | 6.301040  | -7.759738  | -4.059898 |
| LIAM | A | PRO | 45 | T | -4.065136  | 6.300494  | -7.788389  | -4.067344 |
| LIAM | A | GLY | 46 | T | -4.113965  | 6.033507  | -7.806069  | -4.058533 |
| LIAM | A | ASN | 47 | T | -4.231467  | 5.770187  | -7.792208  | -4.084072 |
| LIAM | A | ASN | 48 | T | -6.229989  | 6.902159  | -10.963023 | -4.696210 |
| LIAM | A | ARG | 49 | E | -6.587610  | 7.297072  | -10.788449 | -4.768501 |
| LIAM | A | LYS | 50 | E | -10.152559 | 11.913760 | -16.499346 | -6.954363 |
| LIAM | A | VAL | 51 | E | -11.538071 | 14.042762 | -17.525412 | -7.386249 |
| LIAM | A | TYR | 52 | E | -14.061529 | 18.044053 | -18.545281 | -6.727705 |
| LIAM | A | GLU | 53 | E | -12.154123 | 13.741800 | -15.374255 | -5.312566 |
| LIAM | A | LEU | 54 | E | -11.449452 | 13.082498 | -14.851454 | -5.036793 |
| LIAM | A | SER | 55 | E | -9.477720  | 9.164982  | -13.689548 | -4.795837 |
| LIAM | A | ASN | 56 | E | -8.299191  | 8.942597  | -12.551848 | -4.861598 |
| LIAM | A | VAL | 57 | E | -8.239896  | 8.952042  | -12.680904 | -4.862698 |
| LIAM | A | GLN | 58 | C | -8.157509  | 8.867846  | -12.945625 | -4.944614 |
| LIAM | A | GLU | 59 | C | -7.734062  | 9.126982  | -12.292154 | -4.858079 |
| LIAM | A | ASP | 60 | C | -7.763141  | 9.142899  | -12.228364 | -4.864152 |
| LIAM | A | SER | 61 | B | -8.016429  | 9.276592  | -12.159402 | -4.861927 |
| LIAM | A | GLN | 62 | C | -8.056361  | 9.293947  | -12.037893 | -4.861310 |
| LIAM | A | PRO | 63 | C | -8.125665  | 9.411227  | -11.704534 | -4.783067 |
| LIAM | A | MET | 64 | E | -10.950772 | 12.580420 | -15.326727 | -5.665954 |
| LIAM | A | CYS | 65 | E | -11.595648 | 12.838443 | -15.914987 | -5.808660 |
| LIAM | A | TYR | 66 | E | -12.737533 | 14.797594 | -19.057158 | -7.240076 |
| LIAM | A | SER | 67 | E | -10.125234 | 7.737739  | -16.708203 | -5.898724 |
| LIAM | A | ASN | 68 | E | -6.574369  | 5.783691  | -12.496490 | -5.488252 |
| LIAM | A | CYS | 69 | E | -4.339745  | 4.834857  | -9.684456  | -5.096752 |
| LIAM | A | PRO | 70 | T | -4.278121  | 4.836205  | -9.819384  | -5.078861 |
| LIAM | A | ASP | 71 | T | -4.246053  | 4.894572  | -9.903179  | -5.090660 |
| LIAM | A | GLY | 72 | E | -4.244288  | 4.899796  | -9.911532  | -5.090240 |
| LIAM | A | GLN | 73 | E | -4.254853  | 4.891986  | -9.863645  | -5.082598 |
| LIAM | A | SER | 74 | E | -5.364746  | 5.339442  | -11.209938 | -5.050343 |
| LIAM | A | THR | 75 | E | -5.928432  | 6.204732  | -11.484181 | -5.277703 |
| LIAM | A | ALA | 76 | E | -7.290962  | 8.635826  | -12.281638 | -5.117507 |
| LIAM | A | LYS | 77 | E | -7.716141  | 10.788257 | -11.772608 | -5.289927 |
| LIAM | A | THR | 78 | C | -8.358164  | 12.399981 | -11.694480 | -5.266071 |
| LIAM | A | PHE | 79 | E | -8.626242  | 12.966139 | -11.320930 | -5.247578 |
| LIAM | A | LEU | 80 | E | -10.084103 | 15.725755 | -12.147412 | -5.158034 |
| LIAM | A | THR | 81 | E | -10.358335 | 16.235701 | -12.041229 | -5.248043 |
| LIAM | A | VAL | 82 | E | -11.139095 | 17.065934 | -11.844646 | -4.787453 |
| LIAM | A | TYR | 83 | E | -12.109911 | 19.533834 | -12.871341 | -5.178174 |
| LIAM | A | TRP | 84 | B | -12.223981 | 17.932795 | -14.094798 | -5.369182 |
| LIAM | A | THR | 85 | C | -9.907455  | 12.072821 | -12.708036 | -4.834326 |

|      |   |     |     |   |            |           |            |           |
|------|---|-----|-----|---|------------|-----------|------------|-----------|
| LIAM | A | PRO | 86  | T | -9.871474  | 11.942371 | -12.893175 | -4.836165 |
| LIAM | A | GLU | 87  | T | -9.865472  | 11.913803 | -12.943553 | -4.842113 |
| LIAM | A | ARG | 88  | E | -9.867600  | 11.857725 | -12.956100 | -4.836139 |
| LIAM | A | VAL | 89  | E | -9.134630  | 12.191547 | -11.816140 | -4.618147 |
| LIAM | A | GLU | 90  | E | -8.100015  | 11.606590 | -10.307078 | -4.419658 |
| LIAM | A | LEU | 91  | E | -6.625183  | 10.826305 | -7.865360  | -3.732457 |
| LIAM | A | ALA | 92  | C | -6.465847  | 10.213422 | -8.312505  | -3.709069 |
| LIAM | A | PRO | 93  | C | -6.371805  | 9.836853  | -8.614275  | -3.704315 |
| LIAM | A | LEU | 94  | C | -6.375178  | 9.820920  | -8.600932  | -3.699556 |
| LIAM | A | PRO | 95  | C | -6.401063  | 9.730005  | -8.548731  | -3.667660 |
| LIAM | A | SER | 96  | C | -6.984578  | 8.007062  | -10.090021 | -3.666286 |
| LIAM | A | TRP | 97  | E | -7.199422  | 8.300021  | -10.699371 | -4.029333 |
| LIAM | A | GLN | 98  | E | -6.763888  | 7.319912  | -10.832572 | -4.317092 |
| LIAM | A | PRO | 99  | T | -4.945348  | 6.077125  | -8.572527  | -4.075978 |
| LIAM | A | VAL | 100 | T | -4.903031  | 6.276733  | -8.621642  | -4.099634 |
| LIAM | A | GLY | 101 | T | -4.858627  | 6.516369  | -8.678810  | -4.152608 |
| LIAM | A | LYS | 102 | E | -4.862302  | 6.504172  | -8.663584  | -4.150275 |
| LIAM | A | GLN | 103 | E | -4.881830  | 6.493383  | -8.593655  | -4.146550 |
| LIAM | A | LEU | 104 | E | -6.032893  | 9.340958  | -9.373479  | -4.637201 |
| LIAM | A | THR | 105 | E | -6.405183  | 9.668178  | -9.433636  | -4.830035 |
| LIAM | A | LEU | 106 | E | -8.841136  | 14.148151 | -10.466465 | -4.810506 |
| LIAM | A | ARG | 107 | E | -10.097284 | 16.235948 | -11.642650 | -5.163576 |
| LIAM | A | CYS | 108 | E | -10.769838 | 15.726854 | -12.268322 | -5.084579 |
| LIAM | A | GLN | 109 | E | -11.404052 | 9.784872  | -17.185094 | -5.700645 |
| LIAM | A | VAL | 110 | E | -9.001373  | 9.355762  | -12.911334 | -4.804963 |
| LIAM | A | GLU | 111 | E | -8.805351  | 9.398025  | -13.102364 | -4.829773 |
| LIAM | A | GLY | 112 | C | -8.792354  | 9.399584  | -13.144134 | -4.822421 |
| LIAM | A | GLY | 113 | T | -8.722871  | 9.245672  | -13.236639 | -4.745497 |
| LIAM | A | ALA | 114 | B | -8.726285  | 9.238800  | -13.213317 | -4.734842 |
| LIAM | A | PRO | 115 | T | -9.286489  | 9.095529  | -13.839197 | -4.644933 |
| LIAM | A | ARG | 116 | G | -9.880134  | 8.395505  | -14.285895 | -4.217539 |
| LIAM | A | ALA | 117 | G | -9.688156  | 10.012777 | -13.393273 | -4.277362 |
| LIAM | A | GLN | 118 | G | -10.180864 | 12.650521 | -12.599140 | -4.463908 |
| LIAM | A | LEU | 119 | E | -10.182623 | 13.072707 | -12.358011 | -4.452670 |
| LIAM | A | THR | 120 | E | -10.206970 | 13.352744 | -12.145355 | -4.436198 |
| LIAM | A | VAL | 121 | E | -10.208528 | 13.399489 | -12.109080 | -4.432375 |
| LIAM | A | VAL | 122 | E | -11.525494 | 17.082539 | -12.461345 | -4.369094 |
| LIAM | A | LEU | 123 | E | -11.003545 | 14.318400 | -13.750988 | -4.869909 |
| LIAM | A | LEU | 124 | E | -8.367522  | 8.288745  | -12.764699 | -4.901481 |
| LIAM | A | ARG | 125 | E | -5.865467  | 6.530273  | -10.544794 | -4.956723 |
| LIAM | A | GLY | 126 | T | -5.625539  | 6.524612  | -10.742780 | -4.986267 |
| LIAM | A | GLU | 127 | T | -5.622837  | 6.533220  | -10.756923 | -4.988112 |
| LIAM | A | LYS | 128 | E | -5.622825  | 6.533110  | -10.757156 | -4.988152 |
| LIAM | A | GLU | 129 | E | -5.627674  | 6.523256  | -10.741350 | -4.989359 |
| LIAM | A | LEU | 130 | E | -6.264856  | 6.569004  | -11.190406 | -5.050359 |
| LIAM | A | LYS | 131 | E | -8.536412  | 9.295149  | -13.697291 | -5.272197 |
| LIAM | A | ARG | 132 | E | -8.023783  | 8.133318  | -11.971080 | -4.244989 |
| LIAM | A | GLU | 133 | E | -6.084316  | 4.733588  | -10.625431 | -4.001308 |
| LIAM | A | PRO | 134 | E | -5.006793  | 4.485840  | -9.543001  | -3.965924 |
| LIAM | A | ALA | 135 | C | -4.819356  | 4.704924  | -9.586935  | -4.007505 |
| LIAM | A | VAL | 136 | C | -4.771651  | 4.714284  | -9.682411  | -4.014667 |
| LIAM | A | GLY | 137 | T | -4.772861  | 4.706453  | -9.681708  | -4.015658 |
| LIAM | A | GLU | 138 | T | -4.838706  | 4.719064  | -9.576509  | -4.018213 |
| LIAM | A | PRO | 139 | T | -5.429393  | 5.197469  | -9.988109  | -4.117368 |
| LIAM | A | ALA | 140 | E | -6.273620  | 4.891613  | -10.887176 | -4.114780 |
| LIAM | A | GLU | 141 | E | -8.070514  | 10.088398 | -12.394230 | -5.066574 |
| LIAM | A | VAL | 142 | E | -7.326740  | 13.281303 | -8.853205  | -4.646895 |
| LIAM | A | THR | 143 | E | -6.579799  | 12.204108 | -8.696291  | -4.728415 |
| LIAM | A | THR | 144 | E | -6.545619  | 12.234280 | -8.737276  | -4.711746 |
| LIAM | A | THR | 145 | E | -6.542524  | 12.231048 | -8.748141  | -4.707018 |
| LIAM | A | VAL | 146 | E | -6.563515  | 12.215918 | -8.660137  | -4.675840 |
| LIAM | A | LEU | 147 | E | -6.610195  | 11.288549 | -8.914160  | -4.485831 |
| LIAM | A | VAL | 148 | E | -7.071772  | 9.847905  | -9.466832  | -3.641872 |
| LIAM | A | ARG | 149 | T | -6.588107  | 8.517991  | -9.427689  | -3.646025 |
| LIAM | A | ARG | 150 | T | -6.352882  | 7.991569  | -10.010060 | -3.947587 |
| LIAM | A | ASP | 151 | T | -6.333138  | 7.946459  | -10.126911 | -3.984794 |
| LIAM | A | HIS | 152 | T | -6.390045  | 7.904821  | -10.214697 | -4.075104 |
| LIAM | A | HIS | 153 | T | -6.480089  | 7.589730  | -10.412781 | -4.154940 |
| LIAM | A | GLY | 154 | T | -6.914667  | 7.135950  | -11.484944 | -4.613448 |
| LIAM | A | ALA | 155 | T | -8.070299  | 8.080071  | -13.166233 | -4.944445 |
| LIAM | A | GLN | 156 | E | -8.729746  | 10.238125 | -12.815488 | -4.978268 |
| LIAM | A | PHE | 157 | E | -9.296087  | 11.916966 | -12.021708 | -4.835555 |
| LIAM | A | SER | 158 | E | -11.364458 | 14.075702 | -14.002887 | -5.200943 |
| LIAM | A | CYS | 159 | E | -13.491808 | 14.664455 | -17.677070 | -5.601139 |
| LIAM | A | ARG | 160 | E | -13.855056 | 14.483653 | -18.838844 | -5.954696 |
| LIAM | A | THR | 161 | E | -12.671818 | 15.722840 | -15.759590 | -5.675599 |
| LIAM | A | GLU | 162 | E | -12.258128 | 15.797597 | -15.159605 | -5.412112 |
| LIAM | A | LEU | 163 | E | -10.248536 | 13.174883 | -12.185317 | -4.444221 |
| LIAM | A | ASP | 164 | E | -9.837899  | 12.124357 | -13.078818 | -4.770269 |
| LIAM | A | LEU | 165 | E | -8.341880  | 9.569228  | -12.275538 | -4.904832 |
| LIAM | A | ARG | 166 | G | -7.007793  | 7.958708  | -11.341151 | -4.842105 |

|      |   |     |     |   |            |           |            |           |
|------|---|-----|-----|---|------------|-----------|------------|-----------|
| LIAM | A | PRO | 167 | G | -6.168283  | 8.118117  | -10.568745 | -4.986667 |
| LIAM | A | GLN | 168 | G | -6.089342  | 8.462722  | -10.590581 | -5.050713 |
| LIAM | A | GLY | 169 | C | -5.894402  | 9.564869  | -9.931755  | -4.990108 |
| LIAM | A | LEU | 170 | C | -5.897135  | 9.615672  | -9.902088  | -4.993682 |
| LIAM | A | GLU | 171 | E | -5.981736  | 9.920969  | -9.704322  | -5.021962 |
| LIAM | A | LEU | 172 | E | -6.455119  | 12.098831 | -8.962670  | -5.014377 |
| LIAM | A | PHE | 173 | E | -6.611518  | 12.464345 | -8.426720  | -4.870773 |
| LIAM | A | GLU | 174 | E | -8.250624  | 13.249864 | -11.634989 | -5.490536 |
| LIAM | A | ASN | 175 | E | -8.108413  | 9.261040  | -13.180270 | -5.289681 |
| LIAM | A | THR | 176 | E | -8.205044  | 8.692622  | -13.328596 | -5.207374 |
| LIAM | A | SER | 177 | C | -8.273495  | 8.022935  | -13.441668 | -5.102055 |
| LIAM | A | ALA | 178 | C | -8.284630  | 7.933917  | -13.412184 | -5.080918 |
| LIAM | A | PRO | 179 | C | -8.342639  | 7.849698  | -13.216268 | -5.008266 |
| LIAM | A | TYR | 180 | E | -10.132190 | 11.421615 | -13.947534 | -5.070502 |
| LIAM | A | GLN | 181 | E | -9.517823  | 12.685353 | -12.512922 | -5.238801 |
| LIAM | A | LEU | 182 | C | -7.588916  | 10.937269 | -9.388059  | -4.091919 |
| LIAM | A | GLN | 183 | E | -7.588916  | 10.937269 | -9.388059  | -4.091919 |
| LIAM | A | THR | 184 | E | -7.588916  | 10.937269 | -9.388059  | -4.091919 |
| LIAM | A | PHE | 185 | C | -7.588916  | 10.937269 | -9.388059  | -4.091919 |
| LIAP | A | SER | 44  | T | -10.677568 | 11.159277 | -14.436055 | -5.081034 |
| LIAP | A | GLN | 45  | T | -10.677568 | 11.159277 | -14.436055 | -5.081034 |
| LIAP | A | PHE | 46  | T | -10.677568 | 11.159277 | -14.436055 | -5.081034 |
| LIAP | A | GLN | 47  | T | -10.677568 | 11.159277 | -14.436055 | -5.081034 |
| LIAP | A | SER | 48  | C | -11.378921 | 10.881479 | -15.675404 | -5.189377 |
| LIAP | A | LEU | 49  | H | -11.364564 | 10.936827 | -15.719469 | -5.213235 |
| LIAP | A | GLU | 50  | H | -11.341308 | 10.904539 | -15.844064 | -5.228491 |
| LIAP | A | GLN | 51  | H | -11.341155 | 10.904959 | -15.845582 | -5.228667 |
| LIAP | A | VAL | 52  | H | -11.339253 | 10.915308 | -15.853386 | -5.228717 |
| LIAP | A | LYS | 53  | H | -12.788925 | 11.617919 | -18.623184 | -5.875379 |
| LIAP | A | ARG | 54  | C | -13.115820 | 11.042471 | -18.798061 | -5.540037 |
| LIAP | A | ARG | 55  | C | -13.904350 | 14.602660 | -18.016914 | -5.262789 |
| LIAP | A | PRO | 56  | H | -12.498935 | 17.875736 | -13.396353 | -4.971960 |
| LIAP | A | ALA | 57  | H | -12.165893 | 17.637033 | -13.445352 | -4.981731 |
| LIAP | A | HIS | 58  | H | -12.090543 | 17.881555 | -13.426569 | -5.002831 |
| LIAP | A | LEU | 59  | H | -11.651673 | 19.095693 | -12.058571 | -4.837694 |
| LIAP | A | MET | 60  | H | -11.649823 | 19.103184 | -12.064533 | -4.839538 |
| LIAP | A | ALA | 61  | H | -11.791512 | 19.352115 | -11.843240 | -4.812987 |
| LIAP | A | LEU | 62  | H | -11.945827 | 20.004975 | -11.320744 | -4.759633 |
| LIAP | A | LEU | 63  | H | -12.000095 | 20.044229 | -11.134465 | -4.720232 |
| LIAP | A | GLN | 64  | H | -13.736507 | 17.802080 | -16.240735 | -5.220038 |
| LIAP | A | HIS | 65  | H | -12.093242 | 13.060987 | -14.800153 | -4.589995 |
| LIAP | A | VAL | 66  | H | -11.097072 | 13.405987 | -13.487739 | -4.559628 |
| LIAP | A | ALA | 67  | H | -10.205608 | 12.363000 | -13.366683 | -4.856232 |
| LIAP | A | LEU | 68  | H | -9.657773  | 12.702787 | -12.718429 | -4.874101 |
| LIAP | A | GLN | 69  | H | -8.889081  | 12.779335 | -11.787492 | -5.003057 |
| LIAP | A | PHE | 70  | C | -8.603951  | 13.030521 | -11.269707 | -4.792449 |
| LIAP | A | GLU | 71  | C | -8.431805  | 13.398624 | -10.840485 | -4.645486 |
| LIAP | A | PRO | 72  | H | -8.404548  | 13.807630 | -10.558292 | -4.583044 |
| LIAP | A | GLY | 73  | H | -8.443658  | 13.896815 | -10.436200 | -4.559605 |
| LIAP | A | PRO | 74  | H | -8.691504  | 14.467657 | -9.918567  | -4.303771 |
| LIAP | A | LEU | 75  | H | -9.038923  | 15.309780 | -9.495893  | -4.187504 |
| LIAP | A | LEU | 76  | H | -9.806672  | 17.591291 | -8.997938  | -4.103444 |
| LIAP | A | CYS | 77  | H | -11.018787 | 16.265925 | -12.390866 | -4.717183 |
| LIAP | A | CYS | 78  | H | -11.713971 | 16.709840 | -13.979626 | -5.078140 |
| LIAP | A | LEU | 79  | H | -11.824873 | 16.672619 | -14.179896 | -5.166419 |
| LIAP | A | HIS | 80  | H | -12.090969 | 15.952770 | -15.111256 | -5.269628 |
| LIAP | A | ALA | 81  | H | -10.759444 | 12.861396 | -13.884960 | -5.064892 |
| LIAP | A | ASP | 82  | H | -10.541451 | 12.280246 | -14.370266 | -5.159431 |
| LIAP | A | MET | 83  | H | -9.075451  | 11.768058 | -12.015190 | -4.863540 |
| LIAP | A | LEU | 84  | H | -7.629033  | 9.357143  | -11.060069 | -4.603263 |
| LIAP | A | GLY | 85  | H | -6.894430  | 6.770543  | -11.686500 | -4.543783 |
| LIAP | A | SER | 86  | C | -6.721549  | 6.901750  | -11.691289 | -4.547753 |
| LIAP | A | LEU | 87  | C | -5.639332  | 7.392636  | -9.582459  | -4.468762 |
| LIAP | A | GLY | 88  | C | -5.452309  | 7.355910  | -9.669592  | -4.468574 |
| LIAP | A | PRO | 89  | H | -5.466118  | 7.314165  | -9.639488  | -4.466012 |
| LIAP | A | LYS | 90  | H | -5.505063  | 7.423035  | -9.483630  | -4.462390 |
| LIAP | A | GLU | 91  | H | -5.524699  | 7.426830  | -9.408501  | -4.459036 |
| LIAP | A | ALA | 92  | H | -6.221539  | 7.291007  | -9.923482  | -4.470694 |
| LIAP | A | LYS | 93  | H | -10.225530 | 9.011466  | -15.480983 | -4.935702 |
| LIAP | A | LYS | 94  | H | -10.185844 | 11.050596 | -14.158927 | -4.792545 |
| LIAP | A | ALA | 95  | H | -10.570924 | 13.726122 | -12.717950 | -4.676645 |
| LIAP | A | PHE | 96  | H | -10.607132 | 13.945513 | -12.438920 | -4.646100 |
| LIAP | A | LEU | 97  | H | -10.603463 | 13.956362 | -12.455328 | -4.647383 |
| LIAP | A | ASP | 98  | H | -10.612103 | 13.940069 | -12.420235 | -4.641233 |
| LIAP | A | PHE | 99  | H | -12.671760 | 17.376777 | -14.348086 | -4.913272 |
| LIAP | A | TYR | 100 | H | -13.086403 | 16.069778 | -15.727081 | -5.093083 |
| LIAP | A | HIS | 101 | H | -12.595168 | 16.217459 | -14.949921 | -5.011560 |
| LIAP | A | SER | 102 | H | -11.827072 | 15.486612 | -13.949716 | -4.937636 |
| LIAP | A | PHE | 103 | H | -8.949771  | 13.280713 | -10.494170 | -4.612558 |
| LIAP | A | LEU | 104 | H | -6.264334  | 9.345328  | -8.612599  | -4.220977 |
| LIAP | A | GLU | 105 | T | -5.246179  | 6.964033  | -8.617970  | -4.015994 |

|      |   |     |     |   |            |           |            |           |
|------|---|-----|-----|---|------------|-----------|------------|-----------|
| 1IAP | A | LYS | 106 | T | -4.829347  | 8.113864  | -7.541291  | -3.801761 |
| 1IAP | A | THR | 107 | T | -4.828804  | 8.117798  | -7.543439  | -3.801764 |
| 1IAP | A | ALA | 108 | T | -4.829329  | 8.113307  | -7.540853  | -3.800983 |
| 1IAP | A | VAL | 109 | T | -4.883751  | 7.998814  | -7.439545  | -3.760751 |
| 1IAP | A | LEU | 110 | T | -5.232747  | 9.246153  | -6.492429  | -3.591178 |
| 1IAP | A | ARG | 111 | T | -8.541415  | 12.559231 | -9.891731  | -3.623421 |
| 1IAP | A | VAL | 112 | C | -7.005221  | 9.950338  | -8.022953  | -3.186678 |
| 1IAP | A | PRO | 113 | C | -5.715779  | 8.394924  | -7.507396  | -3.337162 |
| 1IAP | A | VAL | 114 | C | -5.499407  | 9.035458  | -7.284078  | -3.345899 |
| 1IAP | A | PRO | 115 | C | -5.472754  | 9.026190  | -7.366159  | -3.349126 |
| 1IAP | A | PRO | 116 | H | -5.468744  | 9.019629  | -7.393749  | -3.354765 |
| 1IAP | A | ASN | 117 | H | -5.512614  | 8.957017  | -7.353951  | -3.369286 |
| 1IAP | A | VAL | 118 | H | -6.100735  | 10.245716 | -7.203328  | -3.390754 |
| 1IAP | A | ALA | 119 | H | -7.203555  | 8.921665  | -9.511136  | -3.529420 |
| 1IAP | A | PHE | 120 | H | -8.205773  | 9.260020  | -11.239747 | -4.062188 |
| 1IAP | A | GLU | 121 | H | -9.033749  | 11.974458 | -12.508527 | -4.888669 |
| 1IAP | A | LEU | 122 | H | -8.760359  | 11.929963 | -11.842385 | -4.651981 |
| 1IAP | A | ASP | 123 | H | -8.328677  | 10.300552 | -11.904242 | -4.398989 |
| 1IAP | A | ARG | 124 | C | -7.432803  | 9.272693  | -10.662731 | -4.177346 |
| 1IAP | A | THR | 125 | C | -5.409918  | 6.144487  | -8.765507  | -3.816303 |
| 1IAP | A | ARG | 126 | C | -4.749847  | 7.478584  | -7.581179  | -3.799038 |
| 1IAP | A | ALA | 127 | G | -4.739213  | 7.509463  | -7.622817  | -3.810343 |
| 1IAP | A | ASP | 128 | G | -4.730115  | 7.560755  | -7.653274  | -3.826679 |
| 1IAP | A | LEU | 129 | G | -4.733383  | 7.557088  | -7.641258  | -3.827153 |
| 1IAP | A | ILE | 130 | C | -4.951393  | 8.237549  | -7.173292  | -3.838301 |
| 1IAP | A | SER | 131 | C | -6.662717  | 10.024772 | -10.057022 | -4.648940 |
| 1IAP | A | GLU | 132 | H | -7.039849  | 10.685942 | -10.149175 | -4.845396 |
| 1IAP | A | ASP | 133 | H | -8.021425  | 10.536941 | -11.706211 | -4.918959 |
| 1IAP | A | VAL | 134 | H | -8.710483  | 10.454663 | -12.486529 | -4.964272 |
| 1IAP | A | GLN | 135 | H | -10.129571 | 10.073238 | -15.381438 | -5.366588 |
| 1IAP | A | ARG | 136 | H | -10.672771 | 10.403646 | -15.457642 | -5.150581 |
| 1IAP | A | ARG | 137 | H | -11.238812 | 9.893787  | -15.573063 | -4.646239 |
| 1IAP | A | PHE | 138 | H | -12.085757 | 15.837523 | -13.683608 | -4.435465 |
| 1IAP | A | VAL | 139 | H | -10.924287 | 11.905158 | -13.596723 | -4.196930 |
| 1IAP | A | GLN | 140 | H | -10.612049 | 10.972412 | -14.214300 | -4.334979 |
| 1IAP | A | GLU | 141 | H | -10.564697 | 10.882236 | -14.364046 | -4.363017 |
| 1IAP | A | VAL | 142 | H | -10.567333 | 10.792643 | -14.414895 | -4.370910 |
| 1IAP | A | VAL | 143 | H | -10.592584 | 10.482637 | -14.522254 | -4.369543 |
| 1IAP | A | GLN | 144 | H | -10.946187 | 9.439443  | -15.745463 | -4.625041 |
| 1IAP | A | SER | 145 | H | -11.653483 | 8.824468  | -17.586576 | -4.895900 |
| 1IAP | A | GLN | 146 | H | -11.909310 | 7.883004  | -18.940721 | -5.189872 |
| 1IAP | A | GLN | 147 | H | -9.410122  | 7.702383  | -13.946522 | -4.526678 |
| 1IAP | A | VAL | 148 | H | -8.068217  | 6.751252  | -11.803781 | -3.666196 |
| 1IAP | A | ALA | 149 | H | -8.067305  | 6.759083  | -11.806652 | -3.666790 |
| 1IAP | A | VAL | 150 | H | -8.067315  | 6.759896  | -11.805937 | -3.666643 |
| 1IAP | A | GLY | 151 | H | -8.067513  | 6.759048  | -11.803979 | -3.666142 |
| 1IAP | A | ARG | 152 | H | -8.131519  | 6.651352  | -11.567098 | -3.569008 |
| 1IAP | A | GLN | 153 | H | -11.634116 | 10.422688 | -15.562285 | -4.443235 |
| 1IAP | A | LEU | 154 | H | -12.883349 | 11.885295 | -17.297678 | -4.852325 |
| 1IAP | A | GLU | 155 | H | -13.132278 | 11.827566 | -18.191555 | -5.221143 |
| 1IAP | A | ASP | 156 | H | -13.513923 | 13.669745 | -18.054320 | -5.455837 |
| 1IAP | A | PHE | 157 | H | -13.598546 | 13.876312 | -17.895762 | -5.491177 |
| 1IAP | A | ARG | 158 | H | -13.542345 | 13.506453 | -18.214645 | -5.522056 |
| 1IAP | A | SER | 159 | H | -11.910893 | 9.024341  | -17.630922 | -5.311555 |
| 1IAP | A | LYS | 160 | H | -9.990479  | 8.425350  | -15.818301 | -5.645245 |
| 1IAP | A | ARG | 161 | H | -7.476661  | 6.836844  | -12.555792 | -5.032353 |
| 1IAP | A | LEU | 162 | H | -4.436319  | 6.839287  | -8.274662  | -4.772679 |
| 1IAP | A | MET | 163 | H | -4.377042  | 7.018305  | -8.353459  | -4.781935 |
| 1IAP | A | GLY | 164 | C | -4.376674  | 7.021915  | -8.355373  | -4.782315 |
| 1IAP | A | MET | 165 | C | -4.376714  | 7.021858  | -8.354865  | -4.782256 |
| 1IAP | A | THR | 166 | T | -4.379843  | 7.022947  | -8.332831  | -4.780951 |
| 1IAP | A | PRO | 167 | T | -5.767112  | 8.739224  | -9.109105  | -4.868067 |
| 1IAP | A | TRP | 168 | T | -8.738657  | 12.819870 | -11.511754 | -5.392261 |
| 1IAP | A | GLU | 169 | H | -11.119239 | 13.933622 | -14.905759 | -5.685470 |
| 1IAP | A | GLN | 170 | H | -11.399169 | 12.479614 | -15.847082 | -5.549786 |
| 1IAP | A | GLU | 171 | H | -12.039521 | 10.367831 | -17.239457 | -5.261810 |
| 1IAP | A | LEU | 172 | H | -11.783978 | 11.254468 | -17.057162 | -5.401983 |
| 1IAP | A | ALA | 173 | H | -10.153688 | 9.172876  | -14.862954 | -4.820458 |
| 1IAP | A | GLN | 174 | H | -9.868785  | 9.458984  | -14.767363 | -4.878521 |
| 1IAP | A | LEU | 175 | H | -9.572080  | 9.584576  | -14.295815 | -4.719574 |
| 1IAP | A | GLU | 176 | H | -6.954195  | 5.991475  | -11.684967 | -4.531160 |
| 1IAP | A | ALA | 177 | H | -4.755498  | 4.292664  | -8.501641  | -3.540790 |
| 1IAP | A | TRP | 178 | C | -4.559439  | 4.459870  | -8.767007  | -3.678808 |
| 1IAP | A | VAL | 179 | C | -4.381002  | 4.274499  | -8.963544  | -3.698563 |
| 1IAP | A | GLY | 180 | C | -4.325125  | 4.169209  | -9.122021  | -3.712027 |
| 1IAP | A | ARG | 181 | C | -4.330886  | 4.148197  | -9.099498  | -3.702212 |
| 1IAP | A | ASP | 182 | C | -4.714650  | 4.052844  | -9.710918  | -3.869509 |
| 1IAP | A | ARG | 183 | H | -4.984764  | 3.571597  | -9.865220  | -3.776670 |
| 1IAP | A | ALA | 184 | H | -5.738974  | 3.127684  | -10.760994 | -3.839902 |
| 1IAP | A | SER | 185 | H | -8.001144  | 4.195529  | -12.794057 | -3.654972 |
| 1IAP | A | TYR | 186 | H | -13.466606 | 10.065987 | -20.819102 | -6.069132 |

|      |   |     |     |   |            |           |            |           |
|------|---|-----|-----|---|------------|-----------|------------|-----------|
| 1IAP | A | GLU | 187 | H | -14.297271 | 11.014688 | -22.629219 | -6.756052 |
| 1IAP | A | ALA | 188 | H | -13.883534 | 10.790466 | -20.494908 | -5.683716 |
| 1IAP | A | ARG | 189 | H | -13.714306 | 11.814607 | -18.765598 | -5.060301 |
| 1IAP | A | GLU | 190 | H | -13.078351 | 12.150753 | -17.279176 | -4.763950 |
| 1IAP | A | ARG | 191 | H | -12.382239 | 11.107922 | -16.599068 | -4.522937 |
| 1IAP | A | HIS | 192 | H | -10.303330 | 9.444559  | -13.684524 | -4.096753 |
| 1IAP | A | VAL | 193 | H | -10.276032 | 9.627840  | -13.700321 | -4.110410 |
| 1IAP | A | ALA | 194 | H | -10.274818 | 9.642828  | -13.701075 | -4.111386 |
| 1IAP | A | GLU | 195 | H | -10.269354 | 9.678814  | -13.717282 | -4.120011 |
| 1IAP | A | ARG | 196 | H | -10.251575 | 9.869396  | -13.687757 | -4.139866 |
| 1IAP | A | LEU | 197 | H | -11.465998 | 14.215001 | -14.312500 | -4.660556 |
| 1IAP | A | LEU | 198 | H | -11.171813 | 14.981612 | -13.817459 | -5.023543 |
| 1IAP | A | MET | 199 | H | -9.688966  | 12.340707 | -12.924219 | -5.184090 |
| 1IAP | A | HIS | 200 | H | -9.508810  | 12.411430 | -13.082951 | -5.243732 |
| 1IAP | A | LEU | 201 | H | -9.502374  | 12.424022 | -13.123808 | -5.266517 |
| 1IAP | A | GLU | 202 | H | -9.234812  | 11.264520 | -13.791478 | -5.384432 |
| 1IAP | A | GLU | 203 | H | -8.663950  | 8.927011  | -14.062096 | -5.277447 |
| 1IAP | A | MET | 204 | H | -8.606706  | 8.884749  | -13.977866 | -5.221258 |
| 1IAP | A | GLN | 205 | G | -8.615373  | 8.744007  | -14.036092 | -5.216448 |
| 1IAP | A | HIS | 206 | G | -7.189642  | 8.375477  | -10.866098 | -4.447397 |
| 1IAP | A | THR | 207 | G | -7.071545  | 8.475185  | -10.996788 | -4.492227 |
| 1IAP | A | ILE | 208 | C | -6.619932  | 7.603456  | -11.070303 | -4.526764 |
| 1IAP | A | SER | 209 | T | -5.395452  | 4.956178  | -10.641119 | -4.612447 |
| 1IAP | A | THR | 210 | T | -5.361092  | 5.047540  | -10.729515 | -4.640997 |
| 1IAP | A | ASP | 211 | T | -5.386044  | 4.905675  | -10.738921 | -4.652981 |
| 1IAP | A | GLU | 212 | H | -5.392616  | 4.860581  | -10.727721 | -4.652022 |
| 1IAP | A | GLU | 213 | H | -5.435434  | 4.710111  | -10.688808 | -4.657320 |
| 1IAP | A | LYS | 214 | H | -7.059384  | 6.600533  | -12.242939 | -5.122267 |
| 1IAP | A | SER | 215 | H | -9.962757  | 8.431667  | -15.968649 | -5.489669 |
| 1IAP | A | ALA | 216 | H | -9.109714  | 9.951690  | -11.246173 | -3.572175 |
| 1IAP | A | ALA | 217 | H | -8.612531  | 10.620318 | -10.576857 | -3.514391 |
| 1IAP | A | VAL | 218 | H | -8.538295  | 10.985096 | -10.514688 | -3.531968 |
| 1IAP | A | VAL | 219 | H | -8.318050  | 11.051778 | -10.666192 | -3.717712 |
| 1IAP | A | ASN | 220 | H | -8.240615  | 10.946189 | -10.882960 | -3.805334 |
| 1IAP | A | ALA | 221 | H | -8.388364  | 11.235002 | -10.837529 | -3.887406 |
| 1IAP | A | ILE | 222 | H | -8.685184  | 11.327076 | -11.277067 | -4.141939 |
| 1IAP | A | GLY | 223 | H | -8.783622  | 10.903626 | -11.480631 | -4.224157 |
| 1IAP | A | LEU | 224 | H | -9.462988  | 10.264574 | -12.487273 | -4.422659 |
| 1IAP | A | TYR | 225 | H | -12.835793 | 14.993265 | -15.694617 | -5.081238 |
| 1IAP | A | MET | 226 | H | -12.834314 | 16.238785 | -17.580346 | -7.056465 |
| 1IAP | A | ARG | 227 | H | -10.940432 | 13.016456 | -15.330627 | -6.199978 |
| 1IAP | A | HIS | 228 | H | -9.221741  | 11.926819 | -12.963601 | -5.600623 |
| 1IAP | A | LEU | 229 | H | -7.327659  | 10.269422 | -9.837142  | -4.414856 |
| 1IAP | A | GLY | 230 | C | -4.143272  | 6.661688  | -6.201484  | -3.386700 |
| 1IAP | A | VAL | 231 | C | -4.143272  | 6.661688  | -6.201484  | -3.386700 |
| 1IAP | A | ARG | 232 | C | -4.143272  | 6.661688  | -6.201484  | -3.386700 |
| 1IAP | A | THR | 233 | C | -4.143272  | 6.661688  | -6.201484  | -3.386700 |
| 1IFR | A | GLY | 432 | C | -8.925111  | 5.169385  | -15.179315 | -4.569605 |
| 1IFR | A | SER | 433 | E | -8.925111  | 5.169385  | -15.179315 | -4.569605 |
| 1IFR | A | HIS | 434 | E | -8.925111  | 5.169385  | -15.179315 | -4.569605 |
| 1IFR | A | ARG | 435 | E | -8.925111  | 5.169385  | -15.179315 | -4.569605 |
| 1IFR | A | THR | 436 | E | -7.844378  | 9.171444  | -11.884888 | -5.018424 |
| 1IFR | A | SER | 437 | C | -7.842959  | 9.350181  | -11.756591 | -4.989842 |
| 1IFR | A | GLY | 438 | C | -7.827695  | 9.434575  | -11.755834 | -4.975599 |
| 1IFR | A | ARG | 439 | C | -7.828414  | 9.438735  | -11.745045 | -4.973206 |
| 1IFR | A | VAL | 440 | E | -7.827943  | 9.441319  | -11.747762 | -4.973222 |
| 1IFR | A | ALA | 441 | E | -9.225909  | 10.321155 | -12.893139 | -4.639914 |
| 1IFR | A | VAL | 442 | E | -9.940910  | 12.510657 | -12.207435 | -4.521233 |
| 1IFR | A | GLU | 443 | E | -11.230951 | 12.340893 | -15.886378 | -5.441008 |
| 1IFR | A | GLU | 444 | E | -8.851778  | 10.451034 | -12.664713 | -5.254401 |
| 1IFR | A | VAL | 445 | E | -7.631023  | 9.191633  | -11.816362 | -5.129485 |
| 1IFR | A | ASP | 446 | T | -6.726881  | 7.597908  | -11.821954 | -5.206510 |
| 1IFR | A | GLU | 447 | T | -6.707799  | 7.730563  | -11.827999 | -5.213662 |
| 1IFR | A | GLU | 448 | T | -6.705952  | 7.749822  | -11.828410 | -5.213146 |
| 1IFR | A | GLY | 449 | T | -6.721721  | 7.677885  | -11.807414 | -5.212128 |
| 1IFR | A | LYS | 450 | C | -6.845242  | 7.369049  | -11.833466 | -5.235504 |
| 1IFR | A | PHE | 451 | E | -8.693627  | 11.973658 | -12.035823 | -5.400272 |
| 1IFR | A | VAL | 452 | E | -10.088984 | 13.786397 | -12.243265 | -5.096273 |
| 1IFR | A | ARG | 453 | E | -13.305393 | 16.235330 | -16.091623 | -5.380450 |
| 1IFR | A | LEU | 454 | E | -13.055488 | 12.846131 | -17.221312 | -5.263797 |
| 1IFR | A | ARG | 455 | E | -10.745604 | 8.356790  | -16.378898 | -5.382310 |
| 1IFR | A | ASN | 456 | E | -8.709858  | 7.116606  | -14.960083 | -5.766559 |
| 1IFR | A | LYS | 457 | C | -7.057467  | 7.036673  | -12.663411 | -5.557056 |
| 1IFR | A | SER | 458 | C | -7.052725  | 7.042369  | -12.693488 | -5.561169 |
| 1IFR | A | ASN | 459 | C | -7.041273  | 7.047374  | -12.747443 | -5.564120 |
| 1IFR | A | GLU | 460 | C | -7.042290  | 7.045671  | -12.741517 | -5.564562 |
| 1IFR | A | ASP | 461 | C | -7.076857  | 7.048924  | -12.612533 | -5.551711 |
| 1IFR | A | GLN | 462 | E | -9.141415  | 7.648479  | -15.817403 | -5.819517 |
| 1IFR | A | SER | 463 | E | -9.303590  | 7.874800  | -15.528629 | -5.719987 |
| 1IFR | A | MET | 464 | T | -10.519857 | 11.794492 | -15.633881 | -5.766899 |
| 1IFR | A | GLY | 465 | T | -10.546035 | 11.968997 | -15.483379 | -5.748460 |

|      |   |     |     |   |            |           |            |           |
|------|---|-----|-----|---|------------|-----------|------------|-----------|
| 1IFR | A | ASN | 466 | T | -10.946897 | 13.244747 | -15.020895 | -5.680155 |
| 1IFR | A | TRP | 467 | E | -11.138408 | 14.249734 | -14.321877 | -5.650949 |
| 1IFR | A | GLN | 468 | E | -12.582120 | 16.555631 | -16.028640 | -6.257625 |
| 1IFR | A | ILE | 469 | E | -12.836074 | 16.646389 | -15.608276 | -6.071296 |
| 1IFR | A | LYS | 470 | E | -14.971087 | 18.056850 | -17.865236 | -6.221456 |
| 1IFR | A | ARG | 471 | E | -14.090736 | 7.782382  | -22.628943 | -6.513075 |
| 1IFR | A | GLN | 472 | E | -8.296122  | 4.895634  | -15.158332 | -5.518131 |
| 1IFR | A | ASN | 473 | E | -6.086795  | 2.945823  | -12.590516 | -4.885553 |
| 1IFR | A | GLY | 474 | T | -4.615825  | 3.042672  | -10.273260 | -4.492365 |
| 1IFR | A | ASP | 475 | T | -4.569049  | 3.211283  | -10.283249 | -4.469203 |
| 1IFR | A | ASP | 476 | T | -4.566824  | 3.227798  | -10.289737 | -4.469690 |
| 1IFR | A | PRO | 477 | C | -4.567906  | 3.224949  | -10.280769 | -4.467751 |
| 1IFR | A | LEU | 478 | C | -4.614244  | 3.251465  | -10.097338 | -4.434731 |
| 1IFR | A | LEU | 479 | E | -6.068151  | 5.376136  | -10.473423 | -4.203278 |
| 1IFR | A | THR | 480 | E | -7.868329  | 7.732418  | -12.004854 | -4.597890 |
| 1IFR | A | TYR | 481 | E | -10.011327 | 15.890073 | -11.289149 | -4.536163 |
| 1IFR | A | ARG | 482 | E | -7.280504  | 10.527060 | -8.412253  | -3.572747 |
| 1IFR | A | PHE | 483 | E | -7.239926  | 10.739084 | -8.451985  | -3.592069 |
| 1IFR | A | PRO | 484 | T | -5.891646  | 10.817529 | -6.732866  | -3.609162 |
| 1IFR | A | PRO | 485 | T | -5.843227  | 10.981897 | -6.806858  | -3.636299 |
| 1IFR | A | LYS | 486 | T | -5.812476  | 11.109304 | -6.877562  | -3.673649 |
| 1IFR | A | PHE | 487 | T | -5.862130  | 11.178373 | -6.749457  | -3.686049 |
| 1IFR | A | THR | 488 | E | -5.831771  | 11.094907 | -6.933960  | -3.735725 |
| 1IFR | A | LEU | 489 | E | -6.786626  | 12.012009 | -8.855105  | -4.286609 |
| 1IFR | A | LYS | 490 | T | -6.439228  | 8.287974  | -10.334236 | -4.442220 |
| 1IFR | A | ALA | 491 | T | -6.471214  | 7.518533  | -10.710463 | -4.424972 |
| 1IFR | A | GLY | 492 | T | -6.454255  | 7.550953  | -10.746362 | -4.434029 |
| 1IFR | A | GLN | 493 | T | -6.554149  | 7.129682  | -10.831936 | -4.403435 |
| 1IFR | A | VAL | 494 | E | -6.575706  | 7.104880  | -10.763794 | -4.396938 |
| 1IFR | A | VAL | 495 | E | -7.623249  | 9.287325  | -10.989010 | -4.309306 |
| 1IFR | A | THR | 496 | E | -8.325888  | 10.635120 | -11.363437 | -4.645871 |
| 1IFR | A | ILE | 497 | E | -9.369379  | 14.046681 | -10.824173 | -4.388107 |
| 1IFR | A | TRP | 498 | E | -9.644616  | 14.192354 | -12.110771 | -4.847761 |
| 1IFR | A | ALA | 499 | T | -5.209369  | 6.768861  | -8.267537  | -4.006979 |
| 1IFR | A | ALA | 500 | T | -3.830604  | 6.380813  | -6.945549  | -4.019059 |
| 1IFR | A | GLY | 501 | T | -2.806231  | 5.850681  | -6.106998  | -4.043322 |
| 1IFR | A | ALA | 502 | T | -2.610256  | 6.412105  | -5.859049  | -3.999789 |
| 1IFR | A | GLY | 503 | C | -2.541335  | 6.452100  | -5.915692  | -3.982366 |
| 1IFR | A | ALA | 504 | C | -2.537961  | 6.476769  | -5.898418  | -3.971856 |
| 1IFR | A | THR | 505 | C | -2.582126  | 6.476345  | -5.816574  | -3.935597 |
| 1IFR | A | HIS | 506 | C | -3.073771  | 7.362413  | -5.650993  | -3.748968 |
| 1IFR | A | SER | 507 | B | -3.623966  | 6.728146  | -6.457290  | -3.619609 |
| 1IFR | A | PRO | 508 | T | -4.275795  | 6.923082  | -6.888233  | -3.359714 |
| 1IFR | A | PRO | 509 | T | -4.496365  | 6.410152  | -7.101256  | -3.365543 |
| 1IFR | A | THR | 510 | T | -5.681571  | 6.691441  | -9.224826  | -3.768254 |
| 1IFR | A | ASP | 511 | E | -6.529717  | 6.776957  | -10.208236 | -3.972188 |
| 1IFR | A | LEU | 512 | E | -8.629506  | 12.218132 | -11.835203 | -4.848224 |
| 1IFR | A | VAL | 513 | E | -8.142881  | 12.935947 | -9.637499  | -4.352544 |
| 1IFR | A | TRP | 514 | T | -7.101056  | 11.529792 | -9.182500  | -4.491446 |
| 1IFR | A | LYS | 515 | T | -5.224701  | 7.712443  | -8.373386  | -4.323253 |
| 1IFR | A | ALA | 516 | T | -5.224173  | 7.717308  | -8.376097  | -4.323753 |
| 1IFR | A | GLN | 517 | T | -5.224425  | 7.713382  | -8.376455  | -4.324076 |
| 1IFR | A | ASN | 518 | T | -5.226437  | 7.692641  | -8.378979  | -4.326056 |
| 1IFR | A | THR | 519 | T | -5.244777  | 7.576101  | -8.367912  | -4.321619 |
| 1IFR | A | TRP | 520 | T | -6.537808  | 9.222234  | -10.268113 | -5.045906 |
| 1IFR | A | GLY | 521 | C | -4.225308  | 4.522727  | -9.025739  | -4.609029 |
| 1IFR | A | CYS | 522 | C | -4.212060  | 4.576698  | -9.052523  | -4.603896 |
| 1IFR | A | GLY | 523 | T | -4.212320  | 4.573797  | -9.051560  | -4.603782 |
| 1IFR | A | ASN | 524 | T | -4.212832  | 4.568701  | -9.049294  | -4.603434 |
| 1IFR | A | SER | 525 | T | -4.223708  | 4.485281  | -9.028694  | -4.594947 |
| 1IFR | A | LEU | 526 | E | -6.467701  | 6.983663  | -10.240635 | -4.373652 |
| 1IFR | A | ARG | 527 | E | -9.814670  | 10.394994 | -13.551464 | -4.917939 |
| 1IFR | A | THR | 528 | E | -11.639681 | 15.597264 | -14.207693 | -5.018809 |
| 1IFR | A | ALA | 529 | E | -11.526633 | 15.616630 | -14.192048 | -5.056753 |
| 1IFR | A | LEU | 530 | E | -9.103896  | 13.138767 | -10.779171 | -4.620691 |
| 1IFR | A | ILE | 531 | E | -5.823563  | 8.649321  | -9.081683  | -4.788264 |
| 1IFR | A | ASN | 532 | T | -3.875120  | 5.908649  | -8.024245  | -4.724726 |
| 1IFR | A | SER | 533 | T | -3.781267  | 5.927887  | -8.280711  | -4.792548 |
| 1IFR | A | THR | 534 | T | -3.776664  | 5.935846  | -8.305540  | -4.795365 |
| 1IFR | A | GLY | 535 | T | -3.776632  | 5.935353  | -8.306193  | -4.795439 |
| 1IFR | A | GLU | 536 | C | -3.795640  | 5.846825  | -8.280242  | -4.795137 |
| 1IFR | A | GLU | 537 | E | -4.889571  | 6.071697  | -9.842893  | -5.172392 |
| 1IFR | A | VAL | 538 | E | -6.645656  | 6.963617  | -11.511459 | -5.139272 |
| 1IFR | A | ALA | 539 | E | -8.896780  | 8.120750  | -13.676088 | -5.083611 |
| 1IFR | A | MET | 540 | E | -12.101840 | 13.801428 | -16.310083 | -5.771079 |
| 1IFR | A | ARG | 541 | E | -8.907751  | 11.571457 | -10.847704 | -4.259160 |
| 1IFR | A | LYS | 542 | E | -8.907751  | 11.571457 | -10.847704 | -4.259160 |
| 1IFR | A | LEU | 543 | E | -8.907751  | 11.571457 | -10.847704 | -4.259160 |
| 1IFR | A | VAL | 544 | C | -8.907751  | 11.571457 | -10.847704 | -4.259160 |
| 1IHK | A | THR | 52  | H | -2.608878  | 2.984961  | -6.161421  | -3.204193 |
| 1IHK | A | ASP | 53  | H | -2.608878  | 2.984961  | -6.161421  | -3.204193 |

|      |   |     |     |   |            |           |            |           |
|------|---|-----|-----|---|------------|-----------|------------|-----------|
| 1IHK | A | LEU | 54  | H | -2.608878  | 2.984961  | -6.161421  | -3.204193 |
| 1IHK | A | ASP | 55  | H | -2.608878  | 2.984961  | -6.161421  | -3.204193 |
| 1IHK | A | HIS | 56  | H | -3.663736  | 4.302558  | -8.168197  | -4.130717 |
| 1IHK | A | LEU | 57  | H | -4.350625  | 5.211223  | -9.318765  | -4.785062 |
| 1IHK | A | LYS | 58  | H | -5.240361  | 6.163337  | -11.370336 | -5.814108 |
| 1IHK | A | GLY | 59  | H | -6.067227  | 6.803006  | -13.241844 | -6.776103 |
| 1IHK | A | ILE | 60  | H | -7.136889  | 8.921688  | -14.768000 | -7.600571 |
| 1IHK | A | LEU | 61  | H | -7.485786  | 8.587020  | -15.264960 | -7.793661 |
| 1IHK | A | ARG | 62  | C | -9.153862  | 10.116628 | -16.911420 | -8.007990 |
| 1IHK | A | ARG | 63  | E | -12.585007 | 13.787088 | -20.868764 | -8.874677 |
| 1IHK | A | ARG | 64  | E | -14.019529 | 15.364134 | -19.159176 | -6.868330 |
| 1IHK | A | GLN | 65  | E | -15.891377 | 17.410793 | -19.072072 | -5.946681 |
| 1IHK | A | LEU | 66  | E | -13.148254 | 16.921273 | -14.627555 | -5.261997 |
| 1IHK | A | TYR | 67  | E | -10.747445 | 12.055065 | -14.241515 | -5.384711 |
| 1IHK | A | CYS | 68  | E | -10.297577 | 12.755355 | -13.776549 | -5.377386 |
| 1IHK | A | ARG | 69  | T | -10.284491 | 12.801508 | -13.813163 | -5.383405 |
| 1IHK | A | THR | 70  | T | -10.283435 | 12.808557 | -13.817003 | -5.383511 |
| 1IHK | A | GLY | 71  | T | -10.287889 | 12.777849 | -13.812184 | -5.384672 |
| 1IHK | A | PHE | 72  | E | -10.644625 | 13.446916 | -13.463483 | -5.382850 |
| 1IHK | A | HIS | 73  | E | -12.487085 | 15.107461 | -15.535589 | -5.639376 |
| 1IHK | A | LEU | 74  | E | -12.587381 | 19.060730 | -13.026563 | -5.135697 |
| 1IHK | A | GLU | 75  | E | -10.811046 | 15.292564 | -12.896559 | -5.386564 |
| 1IHK | A | ILE | 76  | E | -7.834943  | 12.521576 | -9.293657  | -4.645841 |
| 1IHK | A | PHE | 77  | T | -6.502953  | 9.107626  | -9.283090  | -4.423270 |
| 1IHK | A | PRO | 78  | T | -4.936211  | 7.731582  | -7.345572  | -3.960259 |
| 1IHK | A | ASN | 79  | T | -4.922389  | 7.740679  | -7.419208  | -3.972236 |
| 1IHK | A | GLY | 80  | T | -4.918545  | 7.748280  | -7.444066  | -3.976530 |
| 1IHK | A | THR | 81  | C | -4.921792  | 7.719059  | -7.437972  | -3.973197 |
| 1IHK | A | ILE | 82  | E | -4.959625  | 7.654556  | -7.316741  | -3.945169 |
| 1IHK | A | GLN | 83  | E | -6.943122  | 8.438381  | -10.844678 | -4.532578 |
| 1IHK | A | GLY | 84  | E | -6.992343  | 7.399878  | -11.637261 | -4.647518 |
| 1IHK | A | THR | 85  | E | -7.119445  | 6.998768  | -11.800212 | -4.658925 |
| 1IHK | A | ARG | 86  | C | -7.163068  | 6.702327  | -11.833645 | -4.646610 |
| 1IHK | A | LYS | 87  | T | -7.167276  | 6.657332  | -11.837826 | -4.647962 |
| 1IHK | A | ASP | 88  | T | -7.206389  | 6.584346  | -11.767081 | -4.654438 |
| 1IHK | A | HIS | 89  | T | -9.179023  | 7.869755  | -14.250021 | -4.995794 |
| 1IHK | A | SER | 90  | T | -10.340899 | 9.331540  | -15.556018 | -5.005258 |
| 1IHK | A | ARG | 91  | T | -10.600784 | 11.399686 | -14.619168 | -4.938516 |
| 1IHK | A | PHE | 92  | T | -10.917660 | 14.203898 | -13.070304 | -4.736799 |
| 1IHK | A | GLY | 93  | T | -10.919499 | 14.323255 | -12.989891 | -4.727281 |
| 1IHK | A | ILE | 94  | E | -10.930294 | 14.578837 | -12.802028 | -4.701905 |
| 1IHK | A | LEU | 95  | E | -11.376143 | 17.553898 | -12.494685 | -4.928776 |
| 1IHK | A | GLU | 96  | E | -9.699976  | 16.057117 | -10.065322 | -4.707360 |
| 1IHK | A | PHE | 97  | E | -8.549792  | 13.921942 | -8.975079  | -4.039689 |
| 1IHK | A | ILE | 98  | E | -5.091065  | 6.981393  | -6.722254  | -3.167925 |
| 1IHK | A | SER | 99  | E | -3.671309  | 5.102774  | -6.481602  | -3.403862 |
| 1IHK | A | ILE | 100 | E | -3.343203  | 5.467226  | -6.384007  | -3.468025 |
| 1IHK | A | ALA | 101 | E | -3.334905  | 5.481663  | -6.414329  | -3.469689 |
| 1IHK | A | VAL | 102 | T | -3.334874  | 5.481172  | -6.414908  | -3.469726 |
| 1IHK | A | GLY | 103 | T | -3.366391  | 5.398338  | -6.396121  | -3.485068 |
| 1IHK | A | LEU | 104 | E | -3.832652  | 5.958236  | -6.302258  | -3.542217 |
| 1IHK | A | VAL | 105 | E | -5.863422  | 6.509255  | -8.557772  | -3.570797 |
| 1IHK | A | SER | 106 | E | -8.429555  | 8.658377  | -11.309723 | -4.021488 |
| 1IHK | A | ILE | 107 | E | -10.736710 | 14.993451 | -13.629201 | -5.303208 |
| 1IHK | A | ARG | 108 | E | -11.034474 | 11.629672 | -14.974221 | -4.763617 |
| 1IHK | A | GLY | 109 | E | -7.955549  | 6.616414  | -13.139241 | -5.059075 |
| 1IHK | A | VAL | 110 | T | -7.912490  | 6.776409  | -13.170114 | -5.044514 |
| 1IHK | A | ASP | 111 | T | -7.912812  | 6.772114  | -13.170573 | -5.045056 |
| 1IHK | A | SER | 112 | T | -7.913441  | 6.765992  | -13.169361 | -5.045537 |
| 1IHK | A | GLY | 113 | T | -7.914753  | 6.761082  | -13.163294 | -5.045822 |
| 1IHK | A | LEU | 114 | C | -9.476390  | 8.991126  | -13.606671 | -4.853404 |
| 1IHK | A | TYR | 115 | E | -12.174972 | 14.101211 | -15.823390 | -5.339484 |
| 1IHK | A | LEU | 116 | E | -10.885529 | 13.703056 | -13.942188 | -5.543857 |
| 1IHK | A | GLY | 117 | E | -8.521276  | 9.360308  | -12.954055 | -5.505485 |
| 1IHK | A | MET | 118 | E | -8.012711  | 9.632309  | -12.704053 | -5.560974 |
| 1IHK | A | ASN | 119 | E | -5.914574  | 6.637175  | -10.592823 | -5.067934 |
| 1IHK | A | GLU | 120 | T | -5.824993  | 7.101860  | -10.496793 | -5.044562 |
| 1IHK | A | LYS | 121 | T | -5.824800  | 7.103251  | -10.497610 | -5.044532 |
| 1IHK | A | GLY | 122 | T | -5.830505  | 7.084339  | -10.474150 | -5.039853 |
| 1IHK | A | GLU | 123 | E | -5.839145  | 7.043975  | -10.444129 | -5.031588 |
| 1IHK | A | LEU | 124 | E | -6.981841  | 9.974052  | -9.945050  | -4.903929 |
| 1IHK | A | TYR | 125 | E | -8.305718  | 8.645495  | -12.568195 | -4.853245 |
| 1IHK | A | GLY | 126 | E | -4.821475  | 8.433832  | -7.428888  | -4.553866 |
| 1IHK | A | SER | 127 | E | -4.667874  | 8.129870  | -7.740528  | -4.516159 |
| 1IHK | A | GLU | 128 | T | -4.040110  | 7.324816  | -7.322727  | -4.333294 |
| 1IHK | A | LYS | 129 | T | -4.039116  | 7.325675  | -7.330339  | -4.333976 |
| 1IHK | A | LEU | 130 | T | -4.039454  | 7.325265  | -7.327503  | -4.333720 |
| 1IHK | A | THR | 131 | C | -4.223350  | 6.917898  | -7.291729  | -4.251424 |
| 1IHK | A | GLN | 132 | G | -4.291056  | 6.894627  | -7.108962  | -4.234338 |
| 1IHK | A | GLU | 133 | G | -7.777152  | 7.969713  | -12.008373 | -4.754894 |
| 1IHK | A | CYS | 134 | G | -9.326724  | 9.298696  | -13.878339 | -5.033857 |



|      |   |     |     |   |            |           |            |           |
|------|---|-----|-----|---|------------|-----------|------------|-----------|
| 1IHK | A | VAL | 135 | E | -10.116273 | 9.168471  | -14.420758 | -4.950596 |
| 1IHK | A | PHE | 136 | E | -13.656980 | 14.409132 | -16.560566 | -5.133743 |
| 1IHK | A | ARG | 137 | E | -14.684313 | 13.285299 | -20.375021 | -6.393468 |
| 1IHK | A | GLU | 138 | E | -11.500797 | 10.755154 | -16.626947 | -5.981054 |
| 1IHK | A | GLN | 139 | E | -9.395498  | 8.801021  | -14.636842 | -5.622821 |
| 1IHK | A | PHE | 140 | E | -6.023784  | 7.952060  | -9.583582  | -4.784459 |
| 1IHK | A | GLU | 141 | E | -5.981125  | 8.288604  | -9.582469  | -4.818121 |
| 1IHK | A | GLU | 142 | E | -5.973961  | 8.333668  | -9.600580  | -4.821969 |
| 1IHK | A | ASN | 143 | T | -5.973897  | 8.334579  | -9.600759  | -4.822000 |
| 1IHK | A | TRP | 144 | T | -5.975687  | 8.333342  | -9.585702  | -4.819609 |
| 1IHK | A | TYR | 145 | E | -7.464194  | 12.686249 | -9.803068  | -5.249788 |
| 1IHK | A | ASN | 146 | E | -8.583909  | 12.069915 | -11.130373 | -5.143745 |
| 1IHK | A | THR | 147 | E | -11.027011 | 14.036355 | -13.655594 | -5.500803 |
| 1IHK | A | TYR | 148 | E | -14.265479 | 16.210954 | -18.342402 | -6.048255 |
| 1IHK | A | SER | 149 | E | -13.182470 | 13.178729 | -18.042797 | -6.047857 |
| 1IHK | A | SER | 150 | E | -11.687077 | 13.105460 | -16.010343 | -6.021189 |
| 1IHK | A | ASN | 151 | E | -11.536387 | 13.371671 | -16.180980 | -6.120571 |
| 1IHK | A | LEU | 152 | E | -11.006097 | 13.308168 | -14.895617 | -5.566240 |
| 1IHK | A | TYR | 153 | E | -9.831240  | 11.669396 | -13.285888 | -5.129797 |
| 1IHK | A | LYS | 154 | E | -5.456636  | 6.703183  | -9.202282  | -4.558622 |
| 1IHK | A | HIS | 155 | T | -3.703637  | 4.576359  | -8.040101  | -4.418460 |
| 1IHK | A | VAL | 156 | T | -3.610041  | 4.563459  | -8.212434  | -4.415348 |
| 1IHK | A | ASP | 157 | T | -3.610031  | 4.563494  | -8.212569  | -4.415371 |
| 1IHK | A | THR | 158 | T | -3.610045  | 4.563331  | -8.212454  | -4.415356 |
| 1IHK | A | GLY | 159 | T | -3.636995  | 4.462998  | -8.164872  | -4.407821 |
| 1IHK | A | ARG | 160 | C | -4.751754  | 4.470866  | -9.189378  | -4.380328 |
| 1IHK | A | ARG | 161 | E | -10.062937 | 7.470008  | -16.179278 | -5.744358 |
| 1IHK | A | TYR | 162 | E | -13.718374 | 16.553662 | -16.896355 | -5.957474 |
| 1IHK | A | TYR | 163 | E | -13.712765 | 19.408459 | -14.315779 | -5.141152 |
| 1IHK | A | VAL | 164 | C | -10.581479 | 12.788913 | -12.368557 | -4.361631 |
| 1IHK | A | ALA | 165 | C | -8.978814  | 9.392400  | -12.679888 | -4.688260 |
| 1IHK | A | LEU | 166 | B | -8.024792  | 8.245793  | -12.533426 | -4.913024 |
| 1IHK | A | ASN | 167 | T | -5.641645  | 4.792154  | -10.523673 | -4.628716 |
| 1IHK | A | LYS | 168 | T | -4.882391  | 5.826508  | -8.805463  | -4.168073 |
| 1IHK | A | ASP | 169 | T | -4.882387  | 5.826223  | -8.805699  | -4.168107 |
| 1IHK | A | GLY | 170 | T | -4.882935  | 5.823146  | -8.802111  | -4.167604 |
| 1IHK | A | THR | 171 | C | -4.885295  | 5.814613  | -8.787384  | -4.164398 |
| 1IHK | A | PRO | 172 | B | -5.075088  | 6.223614  | -8.144502  | -3.990470 |
| 1IHK | A | ARG | 173 | C | -10.216110 | 8.442466  | -15.675375 | -4.916464 |
| 1IHK | A | GLU | 174 | T | -9.085934  | 8.437530  | -13.979375 | -5.177537 |
| 1IHK | A | GLY | 175 | T | -8.924368  | 8.664820  | -14.160821 | -5.290516 |
| 1IHK | A | THR | 176 | T | -8.929020  | 8.664767  | -14.138048 | -5.291221 |
| 1IHK | A | ARG | 177 | T | -8.931502  | 8.655511  | -14.128043 | -5.290991 |
| 1IHK | A | THR | 178 | T | -8.947737  | 8.663472  | -14.089185 | -5.303399 |
| 1IHK | A | LYS | 179 | T | -9.744705  | 9.372193  | -14.908736 | -5.658539 |
| 1IHK | A | ARG | 180 | T | -11.689376 | 9.472472  | -18.515951 | -6.063456 |
| 1IHK | A | HIS | 181 | T | -10.104249 | 12.398480 | -13.954132 | -5.777849 |
| 1IHK | A | GLN | 182 | T | -10.080897 | 12.485170 | -14.005135 | -5.789696 |
| 1IHK | A | LYS | 183 | G | -10.094768 | 12.570175 | -13.898727 | -5.783604 |
| 1IHK | A | PHE | 184 | G | -10.113642 | 12.702803 | -13.740238 | -5.774331 |
| 1IHK | A | THR | 185 | G | -10.114167 | 12.763590 | -13.693745 | -5.764975 |
| 1IHK | A | HIS | 186 | E | -11.856698 | 15.564039 | -14.953259 | -5.896236 |
| 1IHK | A | PHE | 187 | E | -11.990760 | 16.257169 | -13.124307 | -4.553797 |
| 1IHK | A | LEU | 188 | E | -9.318893  | 11.854861 | -10.537576 | -3.862073 |
| 1IHK | A | PRO | 189 | E | -8.689584  | 11.538427 | -10.898378 | -4.215039 |
| 1IHK | A | ARG | 190 | E | -8.222362  | 10.200429 | -11.220799 | -4.194905 |
| 1IHK | A | PRO | 191 | C | -4.677991  | 6.906068  | -6.902659  | -3.663360 |
| 1IHK | A | VAL | 192 | C | -4.219399  | 7.274059  | -6.796645  | -3.802300 |
| 1IHK | A | ASP | 193 | T | -4.158497  | 7.357415  | -6.885801  | -3.818593 |
| 1IHK | A | PRO | 194 | T | -4.122574  | 7.349964  | -6.963926  | -3.810109 |
| 1IHK | A | ASP | 195 | T | -4.120628  | 7.349051  | -6.977866  | -3.812309 |
| 1IHK | A | LYS | 196 | T | -4.413220  | 7.632404  | -7.028794  | -3.905766 |
| 1IHK | A | VAL | 197 | T | -5.226929  | 7.775949  | -7.997314  | -3.868396 |
| 1IHK | A | PRO | 198 | T | -5.755383  | 7.304468  | -8.463002  | -3.751258 |
| 1IHK | A | GLU | 199 | T | -7.305941  | 8.274246  | -11.780825 | -4.871093 |
| 1IHK | A | LEU | 200 | G | -8.207258  | 12.468819 | -14.374354 | -6.948609 |
| 1IHK | A | TYR | 201 | G | -7.368721  | 9.434016  | -13.383916 | -6.476006 |
| 1IHK | A | LYS | 202 | G | -6.440718  | 7.201929  | -12.091188 | -5.668538 |
| 1IHK | A | ASP | 203 | G | -4.680235  | 5.635330  | -8.569832  | -4.330945 |
| 1IHK | A | ILE | 204 | C | -2.205671  | 4.104258  | -4.516451  | -3.066593 |
| 1IHK | A | LEU | 205 | C | -1.797637  | 3.348726  | -4.698855  | -2.855739 |
| 1IHK | A | SER | 206 | C | -1.797637  | 3.348726  | -4.698855  | -2.855739 |
| 1IHK | A | GLN | 207 | C | -1.797637  | 3.348726  | -4.698855  | -2.855739 |
| 1IHK | A | SER | 208 | C | -1.797637  | 3.348726  | -4.698855  | -2.855739 |
| 1IJR | A | ALA | 1   | C | -3.429037  | 3.263078  | -6.459753  | -2.929943 |
| 1IJR | A | PRO | 2   | C | -3.429037  | 3.263078  | -6.459753  | -2.929943 |
| 1IJR | A | GLU | 3   | T | -3.429037  | 3.263078  | -6.459753  | -2.929943 |
| 1IJR | A | PRO | 4   | T | -3.429037  | 3.263078  | -6.459753  | -2.929943 |
| 1IJR | A | TRP | 5   | T | -6.273440  | 10.185641 | -8.168146  | -4.099246 |
| 1IJR | A | PHE | 6   | B | -7.558480  | 14.201319 | -9.001130  | -4.959062 |
| 1IJR | A | PHE | 7   | T | -8.283282  | 12.607313 | -10.628634 | -4.712457 |

|      |   |     |    |   |            |           |            |           |
|------|---|-----|----|---|------------|-----------|------------|-----------|
| 1IJR | A | LYS | 8  | T | -8.167177  | 11.815876 | -11.106028 | -4.717149 |
| 1IJR | A | ASN | 9  | T | -8.163756  | 11.777238 | -11.141150 | -4.717398 |
| 1IJR | A | LEU | 10 | T | -8.166466  | 11.737100 | -11.136262 | -4.709559 |
| 1IJR | A | SER | 11 | C | -8.629490  | 9.953160  | -12.636517 | -4.811206 |
| 1IJR | A | ARG | 12 | H | -9.082735  | 9.167962  | -13.400340 | -4.904296 |
| 1IJR | A | LYS | 13 | H | -10.109224 | 8.608027  | -15.743553 | -4.965347 |
| 1IJR | A | ASP | 14 | H | -10.250742 | 8.445343  | -15.631086 | -4.848738 |
| 1IJR | A | ALA | 15 | H | -10.272425 | 8.413093  | -15.555320 | -4.826730 |
| 1IJR | A | GLU | 16 | H | -10.368779 | 8.311524  | -15.392213 | -4.758685 |
| 1IJR | A | ARG | 17 | H | -10.384830 | 8.447015  | -15.183564 | -4.667190 |
| 1IJR | A | GLN | 18 | H | -10.624531 | 10.082306 | -14.553885 | -4.527667 |
| 1IJR | A | LEU | 19 | H | -6.777457  | 6.824124  | -10.336065 | -4.046076 |
| 1IJR | A | LEU | 20 | H | -6.291305  | 5.437318  | -11.325465 | -4.343107 |
| 1IJR | A | ALA | 21 | T | -6.146705  | 4.885037  | -11.821717 | -4.431145 |
| 1IJR | A | PRO | 22 | T | -6.113974  | 4.865608  | -11.959669 | -4.474128 |
| 1IJR | A | GLY | 23 | T | -6.110237  | 4.867431  | -11.986846 | -4.482665 |
| 1IJR | A | ASN | 24 | T | -6.341760  | 3.934302  | -12.782598 | -4.692554 |
| 1IJR | A | THR | 25 | T | -6.898194  | 3.302090  | -13.843367 | -4.873945 |
| 1IJR | A | HIS | 26 | T | -7.768415  | 4.693748  | -14.601989 | -5.290371 |
| 1IJR | A | GLY | 27 | T | -9.012965  | 5.903057  | -16.128621 | -5.722334 |
| 1IJR | A | SER | 28 | E | -10.373015 | 10.030469 | -15.814921 | -5.490968 |
| 1IJR | A | PHE | 29 | E | -10.751203 | 12.598298 | -14.199899 | -5.211955 |
| 1IJR | A | LEU | 30 | E | -12.052566 | 16.652953 | -13.702166 | -5.036620 |
| 1IJR | A | ILE | 31 | E | -12.349278 | 17.282641 | -13.110978 | -4.883927 |
| 1IJR | A | ARG | 32 | E | -13.286105 | 10.388910 | -19.812510 | -6.149142 |
| 1IJR | A | GLU | 33 | E | -8.263534  | 7.271876  | -13.765329 | -5.446152 |
| 1IJR | A | SER | 34 | T | -5.409613  | 5.613201  | -10.425604 | -4.967597 |
| 1IJR | A | GLU | 35 | T | -4.415674  | 4.517153  | -9.912625  | -4.869843 |
| 1IJR | A | SER | 36 | T | -4.312555  | 4.499749  | -10.004271 | -4.825239 |
| 1IJR | A | THR | 37 | T | -4.309771  | 4.519491  | -10.009913 | -4.825224 |
| 1IJR | A | ALA | 38 | T | -4.310491  | 4.516295  | -10.005370 | -4.824457 |
| 1IJR | A | GLY | 39 | T | -4.410523  | 4.316116  | -9.930962  | -4.797819 |
| 1IJR | A | SER | 40 | T | -5.382574  | 4.528063  | -10.496810 | -4.591850 |
| 1IJR | A | PHE | 41 | E | -7.481503  | 8.724103  | -11.231220 | -4.821628 |
| 1IJR | A | CYS | 42 | E | -10.156163 | 10.391438 | -14.527708 | -5.367037 |
| 1IJR | A | LEU | 43 | E | -12.913185 | 15.473096 | -16.357658 | -5.718620 |
| 1IJR | A | SER | 44 | E | -13.886420 | 17.470785 | -15.749924 | -5.230294 |
| 1IJR | A | VAL | 45 | E | -13.941693 | 17.465729 | -15.588863 | -5.181633 |
| 1IJR | A | ARG | 46 | E | -14.238055 | 10.634585 | -23.223662 | -7.562535 |
| 1IJR | A | ASP | 47 | E | -8.783877  | 6.013664  | -14.905360 | -5.231866 |
| 1IJR | A | PHE | 48 | E | -6.175513  | 4.978157  | -11.337348 | -4.673236 |
| 1IJR | A | ASP | 49 | T | -4.387510  | 3.566733  | -10.022315 | -4.751230 |
| 1IJR | A | GLN | 50 | T | -4.357749  | 3.575443  | -10.137554 | -4.764647 |
| 1IJR | A | ASN | 51 | T | -4.354192  | 3.585062  | -10.155440 | -4.765865 |
| 1IJR | A | GLN | 52 | T | -4.354164  | 3.586627  | -10.154542 | -4.765640 |
| 1IJR | A | GLY | 53 | T | -4.381835  | 3.521023  | -10.099779 | -4.770165 |
| 1IJR | A | GLU | 54 | E | -6.069075  | 3.959824  | -12.454880 | -5.011567 |
| 1IJR | A | VAL | 55 | E | -7.320322  | 5.558731  | -13.126612 | -4.955159 |
| 1IJR | A | VAL | 56 | E | -8.642262  | 8.725822  | -13.237227 | -4.897581 |
| 1IJR | A | LYS | 57 | E | -9.777556  | 10.770193 | -14.184850 | -5.299680 |
| 1IJR | A | HIS | 58 | E | -10.938196 | 13.191474 | -14.929628 | -5.629876 |
| 1IJR | A | TYR | 59 | E | -11.830522 | 15.396099 | -15.149966 | -5.620559 |
| 1IJR | A | LYS | 60 | E | -11.608737 | 13.601887 | -15.621355 | -5.514338 |
| 1IJR | A | ILE | 61 | E | -10.104220 | 11.643824 | -13.530322 | -4.999319 |
| 1IJR | A | ARG | 62 | E | -8.135719  | 7.280901  | -13.069314 | -4.940340 |
| 1IJR | A | ASN | 63 | E | -4.986196  | 3.802066  | -10.581981 | -4.817050 |
| 1IJR | A | LEU | 64 | T | -2.687113  | 3.654289  | -7.538826  | -4.614957 |
| 1IJR | A | ASP | 65 | T | -2.685934  | 3.661284  | -7.545273  | -4.615527 |
| 1IJR | A | ASN | 66 | T | -2.685935  | 3.661270  | -7.545260  | -4.615526 |
| 1IJR | A | GLY | 67 | T | -2.685994  | 3.660918  | -7.544695  | -4.615484 |
| 1IJR | A | GLY | 68 | C | -2.698530  | 3.656639  | -7.476682  | -4.609135 |
| 1IJR | A | PHE | 69 | E | -6.384048  | 7.102780  | -10.626161 | -4.804069 |
| 1IJR | A | TYR | 70 | E | -9.260219  | 12.489594 | -11.280513 | -4.444086 |
| 1IJR | A | ILE | 71 | T | -7.457888  | 9.359060  | -9.510405  | -3.695965 |
| 1IJR | A | SER | 72 | T | -5.605607  | 7.907998  | -7.905196  | -3.707408 |
| 1IJR | A | PRO | 73 | T | -5.590909  | 8.014199  | -7.928113  | -3.717808 |
| 1IJR | A | ARG | 74 | T | -5.587807  | 8.036023  | -7.940201  | -3.720406 |
| 1IJR | A | ILE | 75 | T | -5.567468  | 8.189884  | -7.959853  | -3.741652 |
| 1IJR | A | THR | 76 | E | -5.526202  | 8.866512  | -7.758998  | -3.815905 |
| 1IJR | A | PHE | 77 | E | -6.578597  | 14.080479 | -7.458959  | -4.368386 |
| 1IJR | A | PRO | 78 | C | -6.476241  | 13.045460 | -8.034300  | -4.445797 |
| 1IJR | A | GLY | 79 | C | -6.486640  | 13.066228 | -8.004440  | -4.454761 |
| 1IJR | A | LEU | 80 | H | -6.595182  | 13.164395 | -7.875981  | -4.476019 |
| 1IJR | A | HIS | 81 | H | -7.186697  | 9.914751  | -10.151327 | -4.557209 |
| 1IJR | A | GLU | 82 | H | -7.242855  | 9.553679  | -10.208407 | -4.570714 |
| 1IJR | A | LEU | 83 | H | -9.471466  | 13.234425 | -11.835958 | -4.990926 |
| 1IJR | A | VAL | 84 | H | -11.190536 | 14.909382 | -13.121600 | -4.610340 |
| 1IJR | A | ARG | 85 | H | -11.856040 | 12.582261 | -14.727305 | -4.359393 |
| 1IJR | A | HIS | 86 | H | -11.762006 | 12.513317 | -15.423907 | -5.003712 |
| 1IJR | A | TYR | 87 | H | -11.479946 | 12.032755 | -15.449828 | -5.045881 |
| 1IJR | A | THR | 88 | H | -9.420181  | 6.571919  | -14.790622 | -4.704570 |

|      |   |     |     |   |            |           |            |           |
|------|---|-----|-----|---|------------|-----------|------------|-----------|
| 1IJR | A | ASN | 89  | H | -6.801465  | 5.103823  | -12.242992 | -4.766169 |
| 1IJR | A | ALA | 90  | C | -6.619636  | 5.940953  | -11.925880 | -4.718444 |
| 1IJR | A | SER | 91  | T | -6.551904  | 6.197911  | -11.962714 | -4.760889 |
| 1IJR | A | ASP | 92  | T | -6.507888  | 6.437324  | -11.999671 | -4.819328 |
| 1IJR | A | GLY | 93  | T | -6.491532  | 6.591806  | -11.982335 | -4.839856 |
| 1IJR | A | LEU | 94  | T | -7.012984  | 8.723848  | -11.658737 | -4.943026 |
| 1IJR | A | CYS | 95  | T | -7.439131  | 9.204104  | -12.310176 | -5.319828 |
| 1IJR | A | THR | 96  | T | -7.830424  | 10.028466 | -12.348093 | -5.514905 |
| 1IJR | A | ARG | 97  | T | -8.484442  | 11.001815 | -12.075785 | -5.391989 |
| 1IJR | A | LEU | 98  | C | -11.026977 | 14.497893 | -13.831397 | -5.188294 |
| 1IJR | A | SER | 99  | C | -10.851683 | 10.925250 | -15.887836 | -5.555956 |
| 1IJR | A | ARG | 100 | C | -9.571221  | 8.580193  | -14.298299 | -4.889126 |
| 1IJR | A | PRO | 101 | B | -6.030417  | 8.140729  | -8.358735  | -3.829200 |
| 1IJR | A | CYS | 102 | C | -6.030417  | 8.140729  | -8.358735  | -3.829200 |
| 1IJR | A | GLN | 103 | C | -6.030417  | 8.140729  | -8.358735  | -3.829200 |
| 1IJR | A | THR | 104 | C | -6.030417  | 8.140729  | -8.358735  | -3.829200 |
| 1IJT | A | GLY | 79  | C | -3.161135  | 3.835615  | -7.423715  | -3.822438 |
| 1IJT | A | ILE | 80  | C | -3.161135  | 3.835615  | -7.423715  | -3.822438 |
| 1IJT | A | LYS | 81  | C | -3.161135  | 3.835615  | -7.423715  | -3.822438 |
| 1IJT | A | ARG | 82  | E | -3.161135  | 3.835615  | -7.423715  | -3.822438 |
| 1IJT | A | LEU | 83  | E | -3.745668  | 5.543098  | -7.435015  | -4.334211 |
| 1IJT | A | ARG | 84  | E | -6.868635  | 8.786773  | -10.727499 | -5.094101 |
| 1IJT | A | ARG | 85  | E | -11.376365 | 12.591413 | -16.349936 | -6.467313 |
| 1IJT | A | LEU | 86  | E | -12.138265 | 15.614954 | -13.969810 | -5.018850 |
| 1IJT | A | TYR | 87  | E | -9.375621  | 11.350600 | -12.528375 | -5.029495 |
| 1IJT | A | CYS | 88  | E | -6.401528  | 7.829738  | -9.756487  | -4.409257 |
| 1IJT | A | ASN | 89  | T | -4.339960  | 7.196891  | -7.435483  | -4.353178 |
| 1IJT | A | VAL | 90  | T | -4.334467  | 7.232293  | -7.447414  | -4.351944 |
| 1IJT | A | GLY | 91  | T | -4.334349  | 7.233190  | -7.448358  | -4.352056 |
| 1IJT | A | ILE | 92  | T | -4.334466  | 7.232381  | -7.447347  | -4.351920 |
| 1IJT | A | GLY | 93  | T | -4.352742  | 7.214110  | -7.375291  | -4.350077 |
| 1IJT | A | PHE | 94  | E | -7.098423  | 11.039584 | -8.792971  | -4.228687 |
| 1IJT | A | HIS | 95  | E | -9.373871  | 11.770900 | -12.182313 | -4.909904 |
| 1IJT | A | LEU | 96  | E | -12.120023 | 16.088488 | -14.045390 | -4.899716 |
| 1IJT | A | GLN | 97  | E | -10.340972 | 10.727267 | -14.282916 | -5.026942 |
| 1IJT | A | ALA | 98  | E | -7.478950  | 8.613708  | -10.848316 | -4.494424 |
| 1IJT | A | LEU | 99  | T | -6.122802  | 6.733614  | -9.616578  | -3.958589 |
| 1IJT | A | PRO | 100 | T | -5.427922  | 8.150795  | -8.128778  | -3.840367 |
| 1IJT | A | ASP | 101 | T | -5.356880  | 8.150110  | -8.309987  | -3.890349 |
| 1IJT | A | GLY | 102 | T | -5.345232  | 8.161666  | -8.360092  | -3.901195 |
| 1IJT | A | ARG | 103 | C | -5.359798  | 8.154632  | -8.300862  | -3.885812 |
| 1IJT | A | ILE | 104 | E | -5.527891  | 8.695211  | -7.918091  | -3.882473 |
| 1IJT | A | GLY | 105 | E | -6.490764  | 8.181048  | -10.140352 | -4.317382 |
| 1IJT | A | GLY | 106 | E | -6.895316  | 7.659099  | -11.467892 | -4.512282 |
| 1IJT | A | ALA | 107 | E | -6.911051  | 7.028019  | -11.838648 | -4.529901 |
| 1IJT | A | HIS | 108 | C | -6.359235  | 6.415726  | -11.022185 | -4.256567 |
| 1IJT | A | ALA | 109 | C | -6.320332  | 6.400142  | -11.092180 | -4.253105 |
| 1IJT | A | ASP | 110 | C | -6.349655  | 6.388622  | -11.033493 | -4.246408 |
| 1IJT | A | THR | 111 | C | -6.491112  | 6.201066  | -10.922259 | -4.156181 |
| 1IJT | A | ARG | 112 | G | -6.568718  | 6.180590  | -10.723284 | -4.105638 |
| 1IJT | A | ASP | 113 | G | -7.850199  | 6.684889  | -12.309097 | -4.280619 |
| 1IJT | A | SER | 114 | G | -9.232737  | 8.484928  | -13.827721 | -4.731491 |
| 1IJT | A | LEU | 115 | C | -10.295637 | 10.418710 | -13.698947 | -4.517031 |
| 1IJT | A | LEU | 116 | E | -11.752256 | 14.299174 | -14.185132 | -4.665365 |
| 1IJT | A | GLU | 117 | E | -9.504475  | 13.041466 | -11.594800 | -4.833131 |
| 1IJT | A | LEU | 118 | E | -8.702247  | 11.799835 | -11.550677 | -4.715541 |
| 1IJT | A | SER | 119 | E | -5.417991  | 6.718879  | -8.052256  | -3.622739 |
| 1IJT | A | PRO | 120 | E | -3.031195  | 5.223703  | -5.531060  | -3.394964 |
| 1IJT | A | VAL | 121 | E | -2.604318  | 5.884812  | -5.206431  | -3.433975 |
| 1IJT | A | GLU | 122 | E | -2.597238  | 5.912511  | -5.227158  | -3.434984 |
| 1IJT | A | ARG | 123 | T | -2.597112  | 5.913240  | -5.228035  | -3.435033 |
| 1IJT | A | GLY | 124 | T | -2.602308  | 5.905073  | -5.202171  | -3.432684 |
| 1IJT | A | VAL | 125 | E | -2.992342  | 6.489004  | -4.881728  | -3.431459 |
| 1IJT | A | VAL | 126 | E | -5.225864  | 8.105188  | -6.881214  | -3.441940 |
| 1IJT | A | SER | 127 | E | -7.545818  | 9.504787  | -9.509503  | -3.720658 |
| 1IJT | A | ILE | 128 | E | -9.554582  | 14.723515 | -11.421341 | -4.719849 |
| 1IJT | A | PHE | 129 | E | -9.608224  | 13.579365 | -11.399726 | -4.335918 |
| 1IJT | A | GLY | 130 | E | -7.139306  | 8.055555  | -9.919744  | -3.849900 |
| 1IJT | A | VAL | 131 | T | -7.132637  | 8.107742  | -9.926970  | -3.848555 |
| 1IJT | A | ALA | 132 | T | -7.132897  | 8.104973  | -9.925610  | -3.848179 |
| 1IJT | A | SER | 133 | T | -7.138767  | 8.043440  | -9.920009  | -3.844937 |
| 1IJT | A | ARG | 134 | T | -7.141478  | 8.027210  | -9.905550  | -3.841361 |
| 1IJT | A | PHE | 135 | E | -9.772173  | 12.851695 | -10.646485 | -3.758078 |
| 1IJT | A | PHE | 136 | E | -12.401489 | 16.642289 | -13.269718 | -4.257383 |
| 1IJT | A | VAL | 137 | E | -11.784406 | 14.213846 | -13.887553 | -4.630882 |
| 1IJT | A | ALA | 138 | E | -9.949903  | 9.942211  | -13.731728 | -4.715495 |
| 1IJT | A | MET | 139 | E | -9.006705  | 8.630994  | -13.898551 | -5.049231 |
| 1IJT | A | SER | 140 | T | -8.190596  | 6.798353  | -13.807941 | -4.943805 |
| 1IJT | A | SER | 141 | T | -7.933973  | 7.679454  | -13.425629 | -5.024549 |
| 1IJT | A | LYS | 142 | T | -7.930742  | 7.695613  | -13.437240 | -5.029054 |
| 1IJT | A | GLY | 143 | T | -7.922876  | 7.822686  | -13.422033 | -5.060396 |

|      |   |     |     |   |            |           |            |           |
|------|---|-----|-----|---|------------|-----------|------------|-----------|
| 1IJT | A | LYS | 144 | C | -8.001832  | 7.771493  | -13.351088 | -5.051236 |
| 1IJT | A | LEU | 145 | E | -8.460901  | 9.711096  | -12.846928 | -5.218215 |
| 1IJT | A | TYR | 146 | E | -9.190225  | 11.350506 | -13.178416 | -5.089460 |
| 1IJT | A | GLY | 147 | E | -6.942852  | 11.931839 | -8.621018  | -4.626310 |
| 1IJT | A | SER | 148 | E | -6.728875  | 11.463328 | -8.973711  | -4.594999 |
| 1IJT | A | PRO | 149 | T | -6.498305  | 10.725641 | -9.420689  | -4.625367 |
| 1IJT | A | PHE | 150 | T | -6.498145  | 10.724015 | -9.423464  | -4.625957 |
| 1IJT | A | PHE | 151 | T | -6.501044  | 10.724545 | -9.408723  | -4.626165 |
| 1IJT | A | THR | 152 | T | -6.870404  | 9.666767  | -10.180290 | -4.635063 |
| 1IJT | A | ASP | 153 | T | -7.165622  | 9.182248  | -10.392584 | -4.695164 |
| 1IJT | A | GLU | 154 | T | -10.319147 | 10.033766 | -16.247946 | -5.787876 |
| 1IJT | A | CYS | 155 | T | -10.616147 | 10.085230 | -16.412750 | -5.844970 |
| 1IJT | A | THR | 156 | E | -11.020043 | 9.928955  | -16.573219 | -5.770292 |
| 1IJT | A | PHE | 157 | E | -11.404740 | 15.385746 | -13.333391 | -4.942003 |
| 1IJT | A | LYS | 158 | E | -9.060119  | 12.382614 | -11.076216 | -4.596893 |
| 1IJT | A | GLU | 159 | E | -7.656462  | 9.442676  | -10.206379 | -3.996828 |
| 1IJT | A | ILE | 160 | E | -5.461481  | 7.385708  | -7.764024  | -3.562619 |
| 1IJT | A | LEU | 161 | E | -4.419228  | 6.407856  | -7.618656  | -3.877269 |
| 1IJT | A | LEU | 162 | T | -4.405109  | 6.513873  | -7.640887  | -3.893070 |
| 1IJT | A | PRO | 163 | T | -4.403627  | 6.523538  | -7.649269  | -3.896203 |
| 1IJT | A | ASN | 164 | T | -4.405839  | 6.513809  | -7.640083  | -3.896070 |
| 1IJT | A | ASN | 165 | T | -4.512228  | 6.351293  | -7.626355  | -3.963049 |
| 1IJT | A | TYR | 166 | T | -6.557799  | 10.876062 | -8.825083  | -4.601881 |
| 1IJT | A | ASN | 167 | E | -7.866934  | 10.651185 | -11.014437 | -5.072140 |
| 1IJT | A | ALA | 168 | E | -10.817773 | 13.236310 | -13.933986 | -5.360402 |
| 1IJT | A | TYR | 169 | E | -14.722862 | 19.259506 | -18.516451 | -6.692305 |
| 1IJT | A | GLU | 170 | E | -14.454289 | 17.200523 | -18.565863 | -6.541843 |
| 1IJT | A | SER | 171 | E | -11.847144 | 14.245340 | -15.505646 | -5.936643 |
| 1IJT | A | TYR | 172 | T | -10.582780 | 12.528264 | -14.816320 | -5.875776 |
| 1IJT | A | LYS | 173 | T | -10.087211 | 11.320924 | -15.058042 | -5.787306 |
| 1IJT | A | TYR | 174 | T | -10.068160 | 11.441194 | -15.043114 | -5.776761 |
| 1IJT | A | PRO | 175 | T | -9.953887  | 12.086801 | -14.542884 | -5.591491 |
| 1IJT | A | GLY | 176 | T | -9.948500  | 12.248182 | -14.392798 | -5.539604 |
| 1IJT | A | MET | 177 | T | -10.157275 | 12.295591 | -14.227771 | -5.391726 |
| 1IJT | A | PHE | 178 | B | -10.446851 | 17.245498 | -11.203719 | -4.643465 |
| 1IJT | A | ILE | 179 | C | -8.679529  | 14.080399 | -9.108963  | -4.062119 |
| 1IJT | A | ALA | 180 | C | -7.288506  | 10.228496 | -9.685273  | -4.269977 |
| 1IJT | A | LEU | 181 | B | -5.961032  | 8.416165  | -9.337403  | -4.555122 |
| 1IJT | A | GLY | 182 | T | -5.175407  | 5.936875  | -10.184985 | -4.820878 |
| 1IJT | A | LYS | 183 | T | -5.047585  | 6.163459  | -10.239384 | -4.868937 |
| 1IJT | A | ASN | 184 | T | -5.044376  | 6.170214  | -10.257628 | -4.875073 |
| 1IJT | A | GLY | 185 | T | -5.056596  | 6.094016  | -10.268785 | -4.887395 |
| 1IJT | A | LYS | 186 | C | -5.184316  | 5.588003  | -10.504115 | -4.959409 |
| 1IJT | A | THR | 187 | B | -5.994756  | 7.197139  | -10.544720 | -5.084607 |
| 1IJT | A | LYS | 188 | C | -7.718832  | 9.558736  | -12.451740 | -5.418733 |
| 1IJT | A | LYS | 189 | T | -7.299718  | 9.413407  | -11.030479 | -4.852422 |
| 1IJT | A | GLY | 190 | T | -7.055700  | 8.953682  | -11.158411 | -4.744390 |
| 1IJT | A | ASN | 191 | T | -7.024788  | 8.980806  | -11.141949 | -4.698414 |
| 1IJT | A | ARG | 192 | T | -6.666826  | 8.861769  | -10.174300 | -4.161773 |
| 1IJT | A | VAL | 193 | T | -6.498669  | 8.727265  | -9.927598  | -3.998748 |
| 1IJT | A | SER | 194 | T | -6.525242  | 8.395730  | -9.989289  | -3.889806 |
| 1IJT | A | PRO | 195 | T | -6.463872  | 8.574667  | -9.870516  | -3.913480 |
| 1IJT | A | THR | 196 | T | -6.458590  | 8.568632  | -9.910912  | -3.936194 |
| 1IJT | A | MET | 197 | T | -6.687311  | 8.492401  | -10.326478 | -4.129204 |
| 1IJT | A | LYS | 198 | G | -6.975908  | 8.473039  | -10.819082 | -4.398674 |
| 1IJT | A | VAL | 199 | G | -7.268560  | 9.057469  | -10.537090 | -4.425004 |
| 1IJT | A | THR | 200 | G | -8.483699  | 9.309051  | -12.286062 | -4.828892 |
| 1IJT | A | HIS | 201 | E | -10.643570 | 11.964110 | -14.112594 | -5.125434 |
| 1IJT | A | PHE | 202 | E | -11.618258 | 17.444805 | -11.973897 | -4.633781 |
| 1IJT | A | LEU | 203 | E | -8.022586  | 10.736687 | -9.004255  | -3.408397 |
| 1IJT | A | PRO | 204 | E | -8.022586  | 10.736687 | -9.004255  | -3.408397 |
| 1IJT | A | ARG | 205 | E | -8.022586  | 10.736687 | -9.004255  | -3.408397 |
| 1IJT | A | LEU | 206 | C | -8.022586  | 10.736687 | -9.004255  | -3.408397 |
| 1IKT | A | LEU | 6   | C | -9.565040  | 9.460720  | -13.223585 | -4.436737 |
| 1IKT | A | GLN | 7   | H | -9.565040  | 9.460720  | -13.223585 | -4.436737 |
| 1IKT | A | SER | 8   | H | -9.565040  | 9.460720  | -13.223585 | -4.436737 |
| 1IKT | A | THR | 9   | H | -9.565040  | 9.460720  | -13.223585 | -4.436737 |
| 1IKT | A | PHE | 10  | H | -10.816398 | 10.632029 | -14.908006 | -4.951823 |
| 1IKT | A | VAL | 11  | H | -11.587917 | 13.773661 | -14.646349 | -5.071445 |
| 1IKT | A | PHE | 12  | H | -11.832020 | 14.971210 | -14.278761 | -4.943211 |
| 1IKT | A | GLU | 13  | H | -10.450486 | 9.779214  | -13.788184 | -4.342788 |
| 1IKT | A | GLU | 14  | H | -10.276035 | 9.469216  | -13.862235 | -4.166062 |
| 1IKT | A | ILE | 15  | H | -10.275285 | 9.460519  | -13.847509 | -4.148851 |
| 1IKT | A | GLY | 16  | H | -10.260975 | 9.233419  | -13.969593 | -4.128909 |
| 1IKT | A | ARG | 17  | H | -10.210377 | 9.069842  | -14.031226 | -4.068571 |
| 1IKT | A | ARG | 18  | H | -9.983076  | 9.220021  | -12.786742 | -3.532121 |
| 1IKT | A | LEU | 19  | H | -8.347965  | 9.931487  | -10.134809 | -3.764935 |
| 1IKT | A | LYS | 20  | H | -6.869256  | 7.567070  | -9.930807  | -3.957986 |
| 1IKT | A | ASP | 21  | H | -6.546496  | 7.646368  | -9.982154  | -4.020958 |
| 1IKT | A | ILE | 22  | H | -6.496698  | 7.861229  | -9.898716  | -3.981355 |
| 1IKT | A | GLY | 23  | H | -6.494250  | 7.867421  | -9.901457  | -3.978120 |

|      |   |     |     |   |            |           |            |           |
|------|---|-----|-----|---|------------|-----------|------------|-----------|
| 1IKT | A | PRO | 24  | H | -6.505333  | 7.792469  | -9.903819  | -3.962491 |
| 1IKT | A | GLU | 25  | H | -6.907355  | 8.230163  | -9.916218  | -3.949645 |
| 1IKT | A | VAL | 26  | H | -7.598232  | 10.169795 | -9.367706  | -3.419820 |
| 1IKT | A | VAL | 27  | H | -7.880669  | 9.579975  | -10.141840 | -3.378496 |
| 1IKT | A | LYS | 28  | H | -7.859772  | 9.493029  | -10.253414 | -3.429181 |
| 1IKT | A | LYS | 29  | H | -8.011795  | 9.808421  | -10.288576 | -3.573721 |
| 1IKT | A | VAL | 30  | H | -8.041062  | 9.850613  | -10.166081 | -3.555527 |
| 1IKT | A | ASN | 31  | C | -8.540508  | 8.246133  | -11.508228 | -3.708837 |
| 1IKT | A | ALA | 32  | E | -9.223333  | 8.658422  | -11.961479 | -3.846214 |
| 1IKT | A | VAL | 33  | E | -11.146353 | 11.628946 | -13.303666 | -3.936547 |
| 1IKT | A | PHE | 34  | E | -12.172688 | 14.809069 | -12.985185 | -4.011553 |
| 1IKT | A | GLU | 35  | E | -13.554942 | 17.828715 | -15.822916 | -5.470091 |
| 1IKT | A | TRP | 36  | E | -10.568496 | 19.065648 | -14.893374 | -9.065408 |
| 1IKT | A | HIS | 37  | E | -7.639157  | 14.012698 | -12.438275 | -7.768232 |
| 1IKT | A | ILE | 38  | E | -4.594182  | 7.915130  | -7.185066  | -4.413851 |
| 1IKT | A | THR | 39  | E | -2.770088  | 3.768724  | -6.707022  | -4.188934 |
| 1IKT | A | LYS | 40  | T | -1.415446  | 4.690002  | -4.998262  | -4.352778 |
| 1IKT | A | GLY | 41  | T | -0.985397  | 4.638407  | -5.579588  | -4.740370 |
| 1IKT | A | GLY | 42  | T | -0.983956  | 4.643602  | -5.588917  | -4.741504 |
| 1IKT | A | ASN | 43  | T | -0.985550  | 4.632329  | -5.580870  | -4.739032 |
| 1IKT | A | ILE | 44  | E | -1.025419  | 4.609400  | -5.390277  | -4.679341 |
| 1IKT | A | GLY | 45  | E | -1.482401  | 3.755985  | -5.227708  | -4.309511 |
| 1IKT | A | ALA | 46  | E | -4.643646  | 6.274468  | -7.921587  | -4.065020 |
| 1IKT | A | LYS | 47  | E | -5.705062  | 10.821425 | -9.143119  | -5.751784 |
| 1IKT | A | TRP | 48  | E | -8.792354  | 15.255655 | -12.055730 | -6.513212 |
| 1IKT | A | THR | 49  | E | -9.960804  | 15.818200 | -12.683247 | -6.262216 |
| 1IKT | A | ILE | 50  | E | -11.349495 | 13.964859 | -12.996264 | -4.210987 |
| 1IKT | A | ASP | 51  | E | -9.158440  | 8.891532  | -12.334680 | -4.176263 |
| 1IKT | A | LEU | 52  | E | -8.820198  | 8.384258  | -12.328381 | -3.994503 |
| 1IKT | A | LYS | 53  | C | -7.095228  | 5.157902  | -11.259599 | -3.955889 |
| 1IKT | A | SER | 54  | T | -6.726493  | 5.299446  | -11.210894 | -3.988804 |
| 1IKT | A | GLY | 55  | T | -6.621705  | 5.844788  | -11.151206 | -4.064765 |
| 1IKT | A | SER | 56  | T | -6.629649  | 5.805852  | -11.135817 | -4.063364 |
| 1IKT | A | GLY | 57  | T | -6.634401  | 5.801783  | -11.126604 | -4.068282 |
| 1IKT | A | LYS | 58  | E | -6.966224  | 6.488618  | -11.080992 | -4.160602 |
| 1IKT | A | VAL | 59  | E | -7.486979  | 9.580163  | -10.545507 | -4.393092 |
| 1IKT | A | TYR | 60  | E | -7.960179  | 11.346681 | -10.284422 | -4.354696 |
| 1IKT | A | GLN | 61  | E | -6.705416  | 7.027576  | -10.457354 | -4.197488 |
| 1IKT | A | GLY | 62  | C | -5.549624  | 4.561742  | -9.628446  | -3.835230 |
| 1IKT | A | PRO | 63  | C | -4.814499  | 4.072796  | -8.579106  | -3.421460 |
| 1IKT | A | ALA | 64  | T | -4.301945  | 4.372890  | -7.889425  | -3.361424 |
| 1IKT | A | LYS | 65  | T | -4.216999  | 4.472056  | -8.062729  | -3.448899 |
| 1IKT | A | GLY | 66  | T | -4.207308  | 4.515338  | -8.073654  | -3.457339 |
| 1IKT | A | ALA | 67  | T | -4.259493  | 4.577219  | -7.938844  | -3.428018 |
| 1IKT | A | ALA | 68  | T | -4.453112  | 4.848466  | -7.853563  | -3.494405 |
| 1IKT | A | ASP | 69  | T | -5.271140  | 5.573415  | -9.234460  | -4.017655 |
| 1IKT | A | THR | 70  | E | -6.206604  | 7.269699  | -9.424347  | -4.030683 |
| 1IKT | A | THR | 71  | E | -7.338898  | 9.848517  | -8.957719  | -3.872567 |
| 1IKT | A | ILE | 72  | E | -9.289651  | 13.999290 | -10.108465 | -4.199646 |
| 1IKT | A | ILE | 73  | E | -10.289490 | 16.663783 | -10.997509 | -4.591270 |
| 1IKT | A | LEU | 74  | E | -10.515539 | 17.226914 | -10.801101 | -4.616015 |
| 1IKT | A | SER | 75  | E | -11.187169 | 15.790724 | -12.248890 | -4.536867 |
| 1IKT | A | ASP | 76  | H | -12.090178 | 13.143840 | -14.985894 | -4.506777 |
| 1IKT | A | GLU | 77  | H | -12.451877 | 11.646334 | -16.788660 | -4.935003 |
| 1IKT | A | ASP | 78  | H | -12.943087 | 11.649248 | -18.444422 | -5.587297 |
| 1IKT | A | PHE | 79  | H | -12.326294 | 16.297735 | -16.038964 | -6.325472 |
| 1IKT | A | MET | 80  | H | -10.243150 | 10.866089 | -13.389215 | -4.602909 |
| 1IKT | A | GLU | 81  | H | -7.064220  | 7.732609  | -10.036933 | -4.063501 |
| 1IKT | A | VAL | 82  | H | -3.544330  | 5.568192  | -4.958864  | -2.921809 |
| 1IKT | A | VAL | 83  | H | -3.467610  | 5.723917  | -5.126217  | -2.972810 |
| 1IKT | A | LEU | 84  | H | -3.434558  | 5.822862  | -5.254720  | -3.031030 |
| 1IKT | A | GLY | 85  | T | -3.431534  | 5.844888  | -5.271857  | -3.038302 |
| 1IKT | A | LYS | 86  | T | -3.432822  | 5.840752  | -5.261466  | -3.036041 |
| 1IKT | A | LEU | 87  | T | -4.472740  | 7.136697  | -6.740149  | -3.579211 |
| 1IKT | A | ASP | 88  | T | -5.110737  | 7.740288  | -7.565506  | -4.064696 |
| 1IKT | A | PRO | 89  | H | -6.559873  | 10.114232 | -8.619489  | -4.441544 |
| 1IKT | A | GLN | 90  | H | -9.772817  | 9.937969  | -13.558532 | -4.489686 |
| 1IKT | A | LYS | 91  | H | -8.928248  | 10.562834 | -11.292695 | -4.005740 |
| 1IKT | A | ALA | 92  | H | -8.342735  | 9.516229  | -10.860555 | -3.794415 |
| 1IKT | A | PHE | 93  | H | -8.352188  | 9.474973  | -10.838910 | -3.773552 |
| 1IKT | A | PHE | 94  | H | -8.302223  | 9.427707  | -10.976058 | -3.784058 |
| 1IKT | A | SER | 95  | H | -8.265278  | 9.338337  | -11.132117 | -3.804367 |
| 1IKT | A | GLY | 96  | T | -8.375481  | 9.008836  | -11.352637 | -3.813785 |
| 1IKT | A | ARG | 97  | T | -9.042912  | 9.223691  | -12.763895 | -4.072663 |
| 1IKT | A | LEU | 98  | T | -7.041180  | 10.189300 | -7.582975  | -3.265148 |
| 1IKT | A | LYS | 99  | E | -6.144392  | 7.808957  | -8.283624  | -3.484653 |
| 1IKT | A | ALA | 100 | E | -5.428688  | 7.717442  | -7.871767  | -3.615630 |
| 1IKT | A | ARG | 101 | E | -5.232169  | 7.075218  | -8.339444  | -3.679189 |
| 1IKT | A | GLY | 102 | E | -5.141645  | 6.969202  | -8.472321  | -3.701403 |
| 1IKT | A | ASN | 103 | T | -5.164314  | 6.838744  | -8.520794  | -3.720482 |
| 1IKT | A | ILE | 104 | H | -5.260291  | 6.785253  | -8.525725  | -3.750756 |

|      |   |     |     |   |            |           |            |           |
|------|---|-----|-----|---|------------|-----------|------------|-----------|
| 1IKT | A | MET | 105 | H | -5.705290  | 5.784953  | -9.448559  | -3.838846 |
| 1IKT | A | LEU | 106 | H | -6.291924  | 6.349252  | -9.306785  | -3.835178 |
| 1IKT | A | SER | 107 | H | -8.875726  | 8.176773  | -11.751265 | -3.860430 |
| 1IKT | A | GLN | 108 | H | -10.990888 | 9.548496  | -14.829538 | -4.476963 |
| 1IKT | A | LYS | 109 | H | -12.250746 | 10.309312 | -17.403371 | -5.384143 |
| 1IKT | A | LEU | 110 | H | -13.068499 | 13.359749 | -16.553008 | -4.922305 |
| 1IKT | A | GLN | 111 | H | -12.436061 | 11.022098 | -16.789086 | -4.803798 |
| 1IKT | A | MET | 112 | H | -10.852207 | 10.199195 | -14.311996 | -4.423465 |
| 1IKT | A | ILE | 113 | H | -10.676923 | 11.454458 | -14.445586 | -4.971822 |
| 1IKT | A | LEU | 114 | H | -10.203984 | 11.889904 | -14.334954 | -5.447816 |
| 1IKT | A | LYS | 115 | H | -9.164223  | 9.652121  | -13.867905 | -5.380682 |
| 1IKT | A | ASP | 116 | H | -7.413375  | 8.791302  | -10.437704 | -4.337841 |
| 1IKT | A | TYR | 117 | H | -6.284273  | 8.102050  | -7.782701  | -3.127430 |
| 1IKT | A | ALA | 118 | C | -6.284273  | 8.102050  | -7.782701  | -3.127430 |
| 1IKT | A | LYS | 119 | C | -6.284273  | 8.102050  | -7.782701  | -3.127430 |
| 1IKT | A | LEU | 120 | C | -6.284273  | 8.102050  | -7.782701  | -3.127430 |
| 1IMJ | A | ALA | 2   | C | -4.787656  | 4.517475  | -8.055057  | -3.182661 |
| 1IMJ | A | ALA | 3   | C | -4.787656  | 4.517475  | -8.055057  | -3.182661 |
| 1IMJ | A | SER | 4   | C | -4.787656  | 4.517475  | -8.055057  | -3.182661 |
| 1IMJ | A | VAL | 5   | E | -4.787656  | 4.517475  | -8.055057  | -3.182661 |
| 1IMJ | A | GLU | 6   | E | -6.413323  | 6.145965  | -10.605063 | -4.314947 |
| 1IMJ | A | GLN | 7   | E | -8.623901  | 7.653103  | -14.583138 | -5.359916 |
| 1IMJ | A | ARG | 8   | C | -7.896530  | 9.234068  | -12.033724 | -4.826652 |
| 1IMJ | A | GLU | 9   | C | -6.882122  | 9.182881  | -10.285156 | -4.539232 |
| 1IMJ | A | GLY | 10  | C | -6.774667  | 9.421394  | -10.162424 | -4.442169 |
| 1IMJ | A | THR | 11  | C | -6.776093  | 9.451879  | -10.127218 | -4.431749 |
| 1IMJ | A | ILE | 12  | E | -6.738563  | 9.610416  | -10.071020 | -4.420606 |
| 1IMJ | A | GLN | 13  | E | -6.766345  | 9.485004  | -10.129087 | -4.427678 |
| 1IMJ | A | VAL | 14  | E | -7.318759  | 9.894402  | -10.907500 | -4.419796 |
| 1IMJ | A | GLN | 15  | T | -7.633144  | 9.382665  | -11.896206 | -4.753928 |
| 1IMJ | A | GLY | 16  | T | -7.647531  | 9.319497  | -11.899395 | -4.766700 |
| 1IMJ | A | GLN | 17  | E | -7.970794  | 8.365056  | -12.719764 | -4.912551 |
| 1IMJ | A | ALA | 18  | E | -8.347660  | 8.778316  | -12.449802 | -4.874828 |
| 1IMJ | A | LEU | 19  | E | -10.598207 | 10.184387 | -15.237194 | -5.290961 |
| 1IMJ | A | PHE | 20  | E | -12.826996 | 13.611492 | -16.227082 | -5.312987 |
| 1IMJ | A | PHE | 21  | E | -16.076420 | 20.050260 | -17.971738 | -5.576061 |
| 1IMJ | A | ARG | 22  | E | -16.063621 | 17.437326 | -19.853631 | -5.890519 |
| 1IMJ | A | GLU | 23  | E | -11.457093 | 13.316142 | -13.702908 | -4.652329 |
| 1IMJ | A | ALA | 24  | E | -9.676443  | 11.404463 | -11.581017 | -3.898612 |
| 1IMJ | A | LEU | 25  | E | -6.487864  | 8.186227  | -9.344300  | -4.135958 |
| 1IMJ | A | PRO | 26  | T | -4.298233  | 4.978478  | -8.089175  | -3.971437 |
| 1IMJ | A | GLY | 27  | T | -3.089757  | 4.872835  | -6.997780  | -4.110647 |
| 1IMJ | A | SER | 28  | T | -3.089147  | 4.873631  | -7.002500  | -4.110666 |
| 1IMJ | A | GLY | 29  | T | -3.089138  | 4.873677  | -7.002593  | -4.110681 |
| 1IMJ | A | GLN | 30  | C | -3.091065  | 4.862770  | -6.994759  | -4.110451 |
| 1IMJ | A | ALA | 31  | C | -3.172433  | 4.851082  | -6.828937  | -4.125835 |
| 1IMJ | A | ARG | 32  | C | -7.154258  | 5.715209  | -11.539407 | -4.096753 |
| 1IMJ | A | PHE | 33  | E | -9.287396  | 9.864960  | -12.646061 | -4.498207 |
| 1IMJ | A | SER | 34  | E | -11.221183 | 13.254472 | -14.111362 | -4.586066 |
| 1IMJ | A | VAL | 35  | E | -11.665162 | 16.015716 | -12.989639 | -4.416663 |
| 1IMJ | A | LEU | 36  | E | -11.622209 | 18.233809 | -12.125355 | -4.735512 |
| 1IMJ | A | LEU | 37  | E | -10.513960 | 17.146256 | -11.076153 | -4.784252 |
| 1IMJ | A | LEU | 38  | C | -9.110220  | 14.717934 | -10.012345 | -4.497816 |
| 1IMJ | A | HIS | 39  | C | -8.156365  | 13.303155 | -9.683160  | -4.502026 |
| 1IMJ | A | GLY | 40  | T | -7.316214  | 11.637855 | -9.541141  | -4.479793 |
| 1IMJ | A | ILE | 41  | T | -7.304975  | 11.650686 | -9.582196  | -4.481738 |
| 1IMJ | A | ARG | 42  | T | -7.307108  | 11.630742 | -9.578448  | -4.480722 |
| 1IMJ | A | PHE | 43  | T | -7.333219  | 11.502695 | -9.564649  | -4.481452 |
| 1IMJ | A | SER | 44  | C | -7.465043  | 11.141314 | -9.555910  | -4.476245 |
| 1IMJ | A | SER | 45  | H | -9.633852  | 12.467806 | -11.828824 | -4.611737 |
| 1IMJ | A | GLU | 46  | H | -11.417942 | 12.966996 | -16.307140 | -5.927536 |
| 1IMJ | A | THR | 47  | H | -11.414328 | 13.542749 | -16.096941 | -6.001142 |
| 1IMJ | A | TRP | 48  | H | -11.022072 | 13.585709 | -15.467435 | -5.939772 |
| 1IMJ | A | GLN | 49  | H | -8.680744  | 9.502254  | -13.574897 | -5.717476 |
| 1IMJ | A | ASN | 50  | H | -8.502436  | 10.212857 | -13.164944 | -5.545757 |
| 1IMJ | A | LEU | 51  | H | -8.487396  | 10.302302 | -13.147148 | -5.530971 |
| 1IMJ | A | GLY | 52  | C | -8.487245  | 10.299383 | -13.149314 | -5.530730 |
| 1IMJ | A | THR | 53  | H | -8.491651  | 10.275505 | -13.135282 | -5.528094 |
| 1IMJ | A | LEU | 54  | H | -9.232031  | 12.388080 | -12.127640 | -5.066918 |
| 1IMJ | A | HIS | 55  | H | -10.539002 | 13.618498 | -13.201331 | -5.148468 |
| 1IMJ | A | ARG | 56  | H | -11.956051 | 13.217325 | -16.010219 | -5.265760 |
| 1IMJ | A | LEU | 57  | H | -8.677380  | 11.163520 | -11.062073 | -4.486277 |
| 1IMJ | A | ALA | 58  | H | -8.591646  | 11.283096 | -11.250966 | -4.537015 |
| 1IMJ | A | GLN | 59  | H | -8.591516  | 11.283243 | -11.252477 | -4.537277 |
| 1IMJ | A | ALA | 60  | H | -8.591525  | 11.283170 | -11.252388 | -4.537243 |
| 1IMJ | A | GLY | 61  | C | -8.592171  | 11.281026 | -11.248119 | -4.537097 |
| 1IMJ | A | TYR | 62  | E | -9.776366  | 12.062340 | -12.486338 | -4.865283 |
| 1IMJ | A | ARG | 63  | E | -12.788262 | 14.146571 | -16.165808 | -4.839979 |
| 1IMJ | A | ALA | 64  | E | -11.503088 | 14.311942 | -12.783076 | -4.104997 |
| 1IMJ | A | VAL | 65  | E | -11.338878 | 14.828625 | -12.669497 | -4.156029 |
| 1IMJ | A | ALA | 66  | E | -11.075686 | 15.467563 | -12.382425 | -4.236145 |

|      |   |     |     |   |            |           |            |           |
|------|---|-----|-----|---|------------|-----------|------------|-----------|
| 1IMJ | A | ILE | 67  | E | -10.542336 | 15.115574 | -12.200887 | -4.467335 |
| 1IMJ | A | ASP | 68  | E | -10.062596 | 14.377812 | -12.174632 | -4.602573 |
| 1IMJ | A | LEU | 69  | T | -7.576061  | 12.649681 | -8.833711  | -4.439767 |
| 1IMJ | A | PRO | 70  | T | -7.057442  | 10.884134 | -9.594601  | -4.455881 |
| 1IMJ | A | GLY | 71  | T | -7.017454  | 10.696228 | -9.854533  | -4.503687 |
| 1IMJ | A | LEU | 72  | T | -6.974609  | 10.503696 | -10.068481 | -4.524345 |
| 1IMJ | A | GLY | 73  | G | -6.125293  | 6.421515  | -11.063401 | -4.645593 |
| 1IMJ | A | HIS | 74  | G | -6.134998  | 5.898875  | -11.321696 | -4.639681 |
| 1IMJ | A | SER | 75  | G | -6.186917  | 5.378055  | -11.545014 | -4.641948 |
| 1IMJ | A | LYS | 76  | T | -5.908389  | 5.359615  | -11.030146 | -4.279996 |
| 1IMJ | A | GLU | 77  | T | -5.739319  | 5.858778  | -10.536405 | -4.092186 |
| 1IMJ | A | ALA | 78  | T | -5.851471  | 7.168448  | -9.402012  | -3.596184 |
| 1IMJ | A | ALA | 79  | C | -5.451539  | 7.617347  | -8.305777  | -3.375812 |
| 1IMJ | A | ALA | 80  | T | -4.771122  | 9.238361  | -6.121959  | -3.192806 |
| 1IMJ | A | PRO | 81  | T | -4.338917  | 9.174997  | -5.888196  | -3.379132 |
| 1IMJ | A | ALA | 82  | T | -3.857406  | 7.317751  | -6.624401  | -3.639759 |
| 1IMJ | A | PRO | 83  | T | -3.483609  | 7.773034  | -6.292774  | -3.855449 |
| 1IMJ | A | ILE | 84  | T | -3.481867  | 7.822681  | -6.294690  | -3.874347 |
| 1IMJ | A | GLY | 85  | T | -3.529014  | 7.643553  | -6.395322  | -3.938273 |
| 1IMJ | A | GLU | 86  | T | -3.617097  | 7.437106  | -6.475524  | -3.997299 |
| 1IMJ | A | LEU | 87  | C | -3.898444  | 8.388902  | -6.002093  | -4.087125 |
| 1IMJ | A | ALA | 88  | C | -5.670097  | 10.393319 | -7.599234  | -4.177069 |
| 1IMJ | A | PRO | 89  | C | -6.828438  | 11.043592 | -9.363950  | -4.262747 |
| 1IMJ | A | GLY | 90  | H | -7.260770  | 11.423059 | -9.279488  | -4.119313 |
| 1IMJ | A | SER | 91  | H | -8.009046  | 10.820939 | -9.803297  | -3.755880 |
| 1IMJ | A | PHE | 92  | H | -9.309297  | 13.651979 | -10.801705 | -3.998454 |
| 1IMJ | A | LEU | 93  | H | -9.358719  | 14.948320 | -9.861063  | -3.725742 |
| 1IMJ | A | ALA | 94  | H | -8.053951  | 10.374454 | -9.386983  | -3.313714 |
| 1IMJ | A | ALA | 95  | H | -7.761249  | 10.308207 | -9.440073  | -3.317448 |
| 1IMJ | A | VAL | 96  | H | -7.706686  | 10.535824 | -9.463681  | -3.353143 |
| 1IMJ | A | VAL | 97  | H | -7.010118  | 9.377958  | -9.513401  | -3.677354 |
| 1IMJ | A | ASP | 98  | H | -6.868830  | 9.615613  | -9.612639  | -3.825756 |
| 1IMJ | A | ALA | 99  | H | -6.876446  | 9.728217  | -9.745209  | -3.973640 |
| 1IMJ | A | LEU | 100 | H | -6.731386  | 9.888971  | -9.759966  | -4.139068 |
| 1IMJ | A | GLU | 101 | C | -5.609247  | 10.046690 | -7.480022  | -3.981343 |
| 1IMJ | A | LEU | 102 | T | -5.592967  | 10.379308 | -7.294708  | -3.958025 |
| 1IMJ | A | GLY | 103 | T | -5.596891  | 10.410781 | -7.235906  | -3.933723 |
| 1IMJ | A | PRO | 104 | T | -5.604234  | 10.407807 | -7.192667  | -3.924921 |
| 1IMJ | A | PRO | 105 | T | -5.629923  | 10.409372 | -7.079127  | -3.903735 |
| 1IMJ | A | VAL | 106 | E | -6.895447  | 12.868215 | -7.050987  | -3.537266 |
| 1IMJ | A | VAL | 107 | E | -7.892145  | 12.720050 | -7.862699  | -3.213749 |
| 1IMJ | A | ILE | 108 | E | -9.347139  | 16.383711 | -8.671057  | -3.392105 |
| 1IMJ | A | SER | 109 | E | -9.711720  | 15.831988 | -9.749477  | -3.758977 |
| 1IMJ | A | PRO | 110 | E | -9.900349  | 15.221195 | -10.503932 | -3.973283 |
| 1IMJ | A | SER | 111 | G | -10.606621 | 13.745798 | -13.134799 | -4.603014 |
| 1IMJ | A | LEU | 112 | G | -10.909118 | 13.337491 | -13.733230 | -4.813641 |
| 1IMJ | A | SER | 113 | G | -11.001866 | 12.926289 | -13.856418 | -4.851222 |
| 1IMJ | A | GLY | 114 | G | -11.020556 | 12.920109 | -13.796277 | -4.852439 |
| 1IMJ | A | MET | 115 | G | -12.747844 | 15.226389 | -16.553721 | -5.708487 |
| 1IMJ | A | TYR | 116 | H | -13.279660 | 17.627324 | -16.054732 | -5.763121 |
| 1IMJ | A | SER | 117 | H | -13.288901 | 19.821719 | -14.563180 | -5.403105 |
| 1IMJ | A | LEU | 118 | H | -12.499887 | 21.555340 | -11.283514 | -4.685442 |
| 1IMJ | A | PRO | 119 | H | -11.526238 | 20.880938 | -11.400671 | -5.282371 |
| 1IMJ | A | PHE | 120 | H | -10.290410 | 16.402266 | -10.919876 | -4.595462 |
| 1IMJ | A | LEU | 121 | H | -5.767853  | 9.495305  | -7.797915  | -4.199217 |
| 1IMJ | A | THR | 122 | H | -4.805650  | 6.282625  | -8.709510  | -4.250822 |
| 1IMJ | A | ALA | 123 | T | -4.277281  | 4.813498  | -8.883153  | -4.091432 |
| 1IMJ | A | PRO | 124 | T | -4.120636  | 5.503457  | -8.617812  | -4.125715 |
| 1IMJ | A | GLY | 125 | T | -4.114651  | 5.549830  | -8.621370  | -4.127492 |
| 1IMJ | A | SER | 126 | T | -4.151876  | 5.295071  | -8.675505  | -4.122508 |
| 1IMJ | A | GLN | 127 | C | -4.335550  | 5.222371  | -8.578044  | -4.069530 |
| 1IMJ | A | LEU | 128 | C | -4.959135  | 7.889700  | -7.787155  | -4.236281 |
| 1IMJ | A | PRO | 129 | C | -6.796682  | 10.328264 | -9.042053  | -4.301248 |
| 1IMJ | A | GLY | 130 | E | -8.357638  | 13.147584 | -10.115777 | -4.367358 |
| 1IMJ | A | PHE | 131 | E | -9.183923  | 17.180750 | -9.117644  | -4.191723 |
| 1IMJ | A | VAL | 132 | E | -9.386705  | 16.626977 | -9.013745  | -3.600564 |
| 1IMJ | A | PRO | 133 | E | -9.481667  | 16.233655 | -9.088379  | -3.489357 |
| 1IMJ | A | VAL | 134 | E | -9.536844  | 15.350840 | -9.782809  | -3.594994 |
| 1IMJ | A | ALA | 135 | T | -9.129823  | 14.528919 | -10.275453 | -4.166356 |
| 1IMJ | A | PRO | 136 | T | -8.448372  | 12.993956 | -10.686532 | -4.637503 |
| 1IMJ | A | ILE | 137 | T | -7.512898  | 10.782595 | -10.936149 | -5.016192 |
| 1IMJ | A | CYS | 138 | T | -6.561422  | 11.698657 | -9.566382  | -5.229101 |
| 1IMJ | A | THR | 139 | T | -6.486422  | 11.522999 | -9.752877  | -5.221365 |
| 1IMJ | A | ASP | 140 | T | -6.454743  | 11.320357 | -9.892328  | -5.201139 |
| 1IMJ | A | LYS | 141 | T | -6.451390  | 11.208425 | -9.945460  | -5.191662 |
| 1IMJ | A | ILE | 142 | T | -6.428494  | 10.681777 | -10.092039 | -5.098490 |
| 1IMJ | A | ASN | 143 | C | -7.025518  | 8.491269  | -11.652405 | -4.777943 |
| 1IMJ | A | ALA | 144 | H | -7.236423  | 7.723721  | -11.880650 | -4.620315 |
| 1IMJ | A | ALA | 145 | H | -7.381881  | 7.555654  | -11.785425 | -4.567975 |
| 1IMJ | A | ASN | 146 | H | -7.471785  | 7.430875  | -11.671164 | -4.564518 |
| 1IMJ | A | TYR | 147 | H | -9.623459  | 10.228281 | -13.932033 | -5.097748 |

|      |   |     |     |   |            |           |            |           |
|------|---|-----|-----|---|------------|-----------|------------|-----------|
| 1IMJ | A | ALA | 148 | H | -9.665341  | 8.478011  | -13.732065 | -4.169237 |
| 1IMJ | A | SER | 149 | H | -9.496307  | 8.611842  | -13.577041 | -4.101319 |
| 1IMJ | A | VAL | 150 | C | -9.435856  | 8.869328  | -13.436304 | -4.062531 |
| 1IMJ | A | LYS | 151 | C | -9.428335  | 8.938697  | -13.417824 | -4.061134 |
| 1IMJ | A | THR | 152 | C | -9.397573  | 9.354928  | -13.257928 | -4.056272 |
| 1IMJ | A | PRO | 153 | C | -9.720948  | 12.247107 | -12.119308 | -3.917156 |
| 1IMJ | A | ALA | 154 | E | -10.057146 | 14.525224 | -11.092204 | -3.801641 |
| 1IMJ | A | LEU | 155 | E | -10.324441 | 16.639988 | -10.025352 | -3.721234 |
| 1IMJ | A | ILE | 156 | E | -10.366997 | 16.954871 | -9.798367  | -3.704949 |
| 1IMJ | A | VAL | 157 | E | -10.457416 | 16.425187 | -10.275809 | -3.838892 |
| 1IMJ | A | TYR | 158 | E | -11.287663 | 14.362450 | -14.333692 | -5.096176 |
| 1IMJ | A | GLY | 159 | E | -8.588197  | 6.358244  | -13.874592 | -4.779907 |
| 1IMJ | A | ASP | 160 | T | -8.505653  | 6.483638  | -14.021497 | -4.806869 |
| 1IMJ | A | GLN | 161 | T | -8.125678  | 6.900180  | -13.758919 | -4.868903 |
| 1IMJ | A | ASP | 162 | T | -8.119091  | 6.878917  | -13.796461 | -4.870022 |
| 1IMJ | A | PRO | 163 | H | -7.912358  | 6.655548  | -13.777259 | -4.779575 |
| 1IMJ | A | MET | 164 | H | -8.125650  | 6.847239  | -13.778880 | -4.787208 |
| 1IMJ | A | GLY | 165 | H | -8.167063  | 6.811930  | -13.693920 | -4.773132 |
| 1IMJ | A | GLN | 166 | H | -8.586771  | 6.233274  | -13.934953 | -4.603986 |
| 1IMJ | A | THR | 167 | H | -8.604379  | 6.225212  | -13.855648 | -4.592495 |
| 1IMJ | A | SER | 168 | H | -10.355260 | 8.035224  | -16.077712 | -5.115408 |
| 1IMJ | A | PHE | 169 | H | -11.249711 | 12.288751 | -15.883382 | -5.314591 |
| 1IMJ | A | GLU | 170 | H | -11.042590 | 13.124179 | -15.253835 | -5.450107 |
| 1IMJ | A | HIS | 171 | H | -11.077167 | 13.897163 | -14.898866 | -5.489773 |
| 1IMJ | A | LEU | 172 | H | -11.063177 | 14.453280 | -14.544229 | -5.443025 |
| 1IMJ | A | LYS | 173 | H | -10.991704 | 14.171123 | -14.687057 | -5.405873 |
| 1IMJ | A | GLN | 174 | C | -10.915810 | 13.512746 | -14.735883 | -5.263068 |
| 1IMJ | A | LEU | 175 | T | -10.810631 | 12.681157 | -14.270091 | -4.721770 |
| 1IMJ | A | PRO | 176 | T | -8.717796  | 10.152106 | -11.310322 | -4.153614 |
| 1IMJ | A | ASN | 177 | T | -8.704382  | 10.189521 | -11.353114 | -4.158507 |
| 1IMJ | A | HIS | 178 | E | -8.506177  | 11.104925 | -10.965567 | -4.125896 |
| 1IMJ | A | ARG | 179 | E | -8.480649  | 11.260803 | -10.957245 | -4.134680 |
| 1IMJ | A | VAL | 180 | E | -8.147315  | 12.035821 | -10.464123 | -4.245034 |
| 1IMJ | A | LEU | 181 | E | -8.038560  | 12.229798 | -10.636858 | -4.597464 |
| 1IMJ | A | ILE | 182 | E | -7.013384  | 10.287324 | -10.387330 | -4.890971 |
| 1IMJ | A | MET | 183 | E | -6.796454  | 9.580239  | -10.971972 | -5.067273 |
| 1IMJ | A | LYS | 184 | T | -6.679003  | 9.354993  | -11.212606 | -5.117249 |
| 1IMJ | A | GLY | 185 | T | -6.645497  | 9.266756  | -11.301818 | -5.135626 |
| 1IMJ | A | ALA | 186 | T | -6.671241  | 9.178934  | -11.309258 | -5.145732 |
| 1IMJ | A | GLY | 187 | T | -7.039148  | 8.582107  | -12.145164 | -5.311388 |
| 1IMJ | A | HIS | 188 | T | -7.433284  | 8.896873  | -12.110476 | -5.231519 |
| 1IMJ | A | PRO | 189 | T | -8.053375  | 9.838560  | -11.767477 | -5.041269 |
| 1IMJ | A | CYS | 190 | H | -10.011809 | 11.117545 | -13.884250 | -5.026939 |
| 1IMJ | A | TYR | 191 | H | -10.937628 | 16.061246 | -12.891288 | -5.018648 |
| 1IMJ | A | LEU | 192 | H | -9.689347  | 9.608068  | -13.877716 | -4.770417 |
| 1IMJ | A | ASP | 193 | H | -9.618681  | 9.362984  | -14.193912 | -4.814104 |
| 1IMJ | A | LYS | 194 | C | -9.656291  | 8.925915  | -14.321173 | -4.810751 |
| 1IMJ | A | PRO | 195 | H | -9.659029  | 8.888008  | -14.320892 | -4.807159 |
| 1IMJ | A | GLU | 196 | H | -9.677472  | 8.652042  | -14.367551 | -4.801222 |
| 1IMJ | A | GLU | 197 | H | -10.885402 | 7.812220  | -16.676160 | -5.183436 |
| 1IMJ | A | TRP | 198 | H | -12.563890 | 15.562274 | -16.095023 | -5.586469 |
| 1IMJ | A | HIS | 199 | H | -11.512937 | 13.613310 | -14.591763 | -5.064648 |
| 1IMJ | A | THR | 200 | H | -10.592730 | 11.406896 | -14.269003 | -4.817660 |
| 1IMJ | A | GLY | 201 | H | -10.589492 | 11.439485 | -14.272583 | -4.820171 |
| 1IMJ | A | LEU | 202 | H | -10.596282 | 11.405255 | -14.244557 | -4.809029 |
| 1IMJ | A | LEU | 203 | H | -10.596374 | 11.423517 | -14.266833 | -4.834010 |
| 1IMJ | A | ASP | 204 | H | -10.263698 | 12.883706 | -13.906892 | -5.386556 |
| 1IMJ | A | PHE | 205 | H | -8.884438  | 14.024377 | -10.400958 | -4.837050 |
| 1IMJ | A | LEU | 206 | H | -6.289184  | 8.751437  | -8.335568  | -3.753053 |
| 1IMJ | A | GLN | 207 | H | -6.289184  | 8.751437  | -8.335568  | -3.753053 |
| 1IMJ | A | GLY | 208 | H | -6.289184  | 8.751437  | -8.335568  | -3.753053 |
| 1IMJ | A | LEU | 209 | C | -6.289184  | 8.751437  | -8.335568  | -3.753053 |
| 1J74 | A | VAL | 7   | C | -1.859415  | 1.836614  | -4.873755  | -2.685760 |
| 1J74 | A | LYS | 8   | C | -1.859415  | 1.836614  | -4.873755  | -2.685760 |
| 1J74 | A | VAL | 9   | H | -1.859415  | 1.836614  | -4.873755  | -2.685760 |
| 1J74 | A | PRO | 10  | H | -1.859415  | 1.836614  | -4.873755  | -2.685760 |
| 1J74 | A | ARG | 11  | H | -6.979982  | 4.258148  | -12.057136 | -3.991229 |
| 1J74 | A | ASN | 12  | H | -8.249016  | 5.119688  | -14.401112 | -4.922683 |
| 1J74 | A | PHE | 13  | H | -9.517547  | 6.805865  | -15.957338 | -5.669655 |
| 1J74 | A | ARG | 14  | H | -11.489309 | 11.688057 | -14.930406 | -4.664359 |
| 1J74 | A | LEU | 15  | H | -11.449169 | 12.214964 | -14.601222 | -4.594749 |
| 1J74 | A | LEU | 16  | H | -11.304458 | 12.017747 | -15.196522 | -4.861117 |
| 1J74 | A | GLU | 17  | H | -11.283839 | 12.010743 | -15.353100 | -4.937012 |
| 1J74 | A | GLU | 18  | H | -11.751466 | 12.458838 | -17.614900 | -6.132222 |
| 1J74 | A | LEU | 19  | H | -10.039057 | 10.042218 | -16.860686 | -6.735890 |
| 1J74 | A | GLU | 20  | H | -8.092300  | 6.811874  | -14.864850 | -5.952786 |
| 1J74 | A | GLU | 21  | H | -7.249429  | 6.463603  | -13.662119 | -5.544887 |
| 1J74 | A | GLY | 22  | H | -6.120889  | 5.295623  | -11.697757 | -4.835920 |
| 1J74 | A | GLN | 23  | H | -5.044600  | 4.846878  | -10.260232 | -4.684652 |
| 1J74 | A | LYS | 24  | H | -4.652267  | 4.316171  | -10.370645 | -4.694724 |
| 1J74 | A | GLY | 25  | C | -3.913922  | 3.268860  | -9.914167  | -4.707121 |



|      |   |     |     |   |            |           |            |           |
|------|---|-----|-----|---|------------|-----------|------------|-----------|
| 1J74 | A | VAL | 26  | T | -3.796711  | 3.526527  | -9.925871  | -4.740280 |
| 1J74 | A | GLY | 27  | T | -3.687966  | 3.991635  | -9.719004  | -4.757495 |
| 1J74 | A | ASP | 28  | T | -3.738149  | 3.933807  | -9.696691  | -4.764785 |
| 1J74 | A | GLY | 29  | T | -3.803105  | 3.953611  | -9.601687  | -4.770031 |
| 1J74 | A | THR | 30  | C | -4.334102  | 5.547628  | -9.400717  | -4.847888 |
| 1J74 | A | VAL | 31  | E | -4.687504  | 6.222315  | -8.911667  | -4.814086 |
| 1J74 | A | SER | 32  | E | -6.972920  | 7.423292  | -10.900495 | -4.599367 |
| 1J74 | A | TRP | 33  | E | -10.620690 | 15.136757 | -14.574515 | -5.932137 |
| 1J74 | A | GLY | 34  | E | -8.451425  | 8.764512  | -13.290364 | -5.493813 |
| 1J74 | A | LEU | 35  | E | -7.238148  | 7.863634  | -12.072833 | -5.226339 |
| 1J74 | A | GLU | 36  | T | -6.955290  | 6.950941  | -12.864436 | -5.408780 |
| 1J74 | A | ASP | 37  | T | -5.656705  | 3.485809  | -11.689075 | -4.680458 |
| 1J74 | A | ASP | 38  | T | -5.291402  | 3.257201  | -11.469909 | -4.499472 |
| 1J74 | A | GLU | 39  | T | -5.265413  | 3.368335  | -11.456739 | -4.488499 |
| 1J74 | A | ASP | 40  | T | -5.281538  | 3.248301  | -11.447395 | -4.466356 |
| 1J74 | A | MET | 41  | T | -5.295036  | 3.197158  | -11.384975 | -4.437769 |
| 1J74 | A | THR | 42  | T | -5.685336  | 3.333963  | -11.238013 | -4.296427 |
| 1J74 | A | LEU | 43  | T | -7.018760  | 6.264668  | -11.463978 | -4.379783 |
| 1J74 | A | THR | 44  | C | -8.480686  | 7.869017  | -12.557615 | -4.571525 |
| 1J74 | A | ARG | 45  | E | -11.724627 | 10.340492 | -17.658773 | -5.906057 |
| 1J74 | A | TRP | 46  | E | -11.808223 | 16.632842 | -13.201770 | -5.220850 |
| 1J74 | A | THR | 47  | E | -9.397331  | 12.041928 | -11.492562 | -4.499605 |
| 1J74 | A | GLY | 48  | E | -8.421749  | 11.138367 | -11.162254 | -4.606860 |
| 1J74 | A | MET | 49  | E | -8.207301  | 11.720285 | -10.809361 | -4.514019 |
| 1J74 | A | ILE | 50  | E | -7.722055  | 11.670321 | -9.951066  | -4.224977 |
| 1J74 | A | ILE | 51  | E | -6.772750  | 9.119032  | -9.211576  | -3.707779 |
| 1J74 | A | GLY | 52  | C | -6.252354  | 8.972052  | -8.841475  | -3.792768 |
| 1J74 | A | PRO | 53  | T | -6.236622  | 8.950212  | -8.879418  | -3.791738 |
| 1J74 | A | PRO | 54  | T | -6.242977  | 8.905617  | -8.868380  | -3.786367 |
| 1J74 | A | ARG | 55  | T | -6.270859  | 8.774403  | -8.849368  | -3.776337 |
| 1J74 | A | THR | 56  | T | -6.518994  | 8.929986  | -8.759736  | -3.880433 |
| 1J74 | A | ASN | 57  | T | -8.048680  | 9.382714  | -10.687364 | -4.150525 |
| 1J74 | A | TYR | 58  | T | -10.552143 | 12.235577 | -14.958310 | -5.347243 |
| 1J74 | A | GLU | 59  | T | -10.658432 | 12.628436 | -15.200704 | -5.568959 |
| 1J74 | A | ASN | 60  | T | -10.740054 | 12.600586 | -15.257896 | -5.600637 |
| 1J74 | A | ARG | 61  | T | -11.087956 | 13.052859 | -14.868774 | -5.330093 |
| 1J74 | A | ILE | 62  | E | -11.073052 | 13.207894 | -14.803829 | -5.316439 |
| 1J74 | A | TYR | 63  | E | -11.404756 | 13.314461 | -14.831129 | -5.288008 |
| 1J74 | A | SER | 64  | E | -12.348447 | 14.882505 | -15.445996 | -5.224442 |
| 1J74 | A | LEU | 65  | E | -12.600239 | 16.477635 | -15.138333 | -5.294728 |
| 1J74 | A | LYS | 66  | E | -11.109477 | 12.837616 | -15.279416 | -5.807567 |
| 1J74 | A | VAL | 67  | E | -9.182378  | 9.901531  | -13.047008 | -5.001200 |
| 1J74 | A | GLU | 68  | E | -6.308161  | 6.093973  | -11.246959 | -4.999173 |
| 1J74 | A | CYS | 69  | C | -6.274136  | 6.279347  | -11.260265 | -4.993298 |
| 1J74 | A | GLY | 70  | T | -6.246538  | 6.506885  | -11.207145 | -4.969930 |
| 1J74 | A | PRO | 71  | T | -6.234866  | 6.620325  | -11.192127 | -4.961847 |
| 1J74 | A | LYS | 72  | T | -6.228464  | 6.693282  | -11.163536 | -4.950819 |
| 1J74 | A | TYR | 73  | T | -7.419256  | 10.841429 | -10.713228 | -4.631866 |
| 1J74 | A | PRO | 74  | T | -7.270760  | 12.280235 | -8.768791  | -3.936888 |
| 1J74 | A | GLU | 75  | T | -7.278536  | 11.959170 | -8.668704  | -3.721300 |
| 1J74 | A | ALA | 76  | T | -7.238087  | 11.989356 | -8.418521  | -3.552879 |
| 1J74 | A | PRO | 77  | T | -7.294170  | 11.995853 | -8.241900  | -3.472171 |
| 1J74 | A | PRO | 78  | C | -7.298898  | 11.976999 | -8.219987  | -3.465107 |
| 1J74 | A | SER | 79  | E | -7.768205  | 11.008776 | -9.174302  | -3.482838 |
| 1J74 | A | VAL | 80  | E | -8.259282  | 12.410598 | -8.420668  | -3.287199 |
| 1J74 | A | ARG | 81  | E | -10.371487 | 14.185711 | -10.574410 | -3.658532 |
| 1J74 | A | PHE | 82  | E | -11.504905 | 19.625445 | -11.554255 | -5.181923 |
| 1J74 | A | VAL | 83  | T | -10.630219 | 16.223822 | -12.351634 | -5.323619 |
| 1J74 | A | THR | 84  | B | -10.420687 | 16.049749 | -12.668375 | -5.486867 |
| 1J74 | A | LYS | 85  | T | -10.270787 | 15.602918 | -13.065462 | -5.591911 |
| 1J74 | A | ILE | 86  | C | -8.804818  | 11.693962 | -12.733095 | -5.644061 |
| 1J74 | A | ASN | 87  | C | -8.317961  | 11.367857 | -12.381695 | -5.515103 |
| 1J74 | A | MET | 88  | B | -7.944053  | 10.815251 | -12.368934 | -5.518089 |
| 1J74 | A | ASN | 89  | T | -7.189272  | 8.160361  | -12.245586 | -5.231595 |
| 1J74 | A | GLY | 90  | T | -6.633473  | 7.144521  | -11.570275 | -4.776877 |
| 1J74 | A | ILE | 91  | B | -6.546152  | 7.001787  | -11.631076 | -4.720938 |
| 1J74 | A | ASN | 92  | T | -6.348939  | 6.150247  | -11.941548 | -4.705515 |
| 1J74 | A | ASN | 93  | T | -6.244154  | 5.758194  | -12.070774 | -4.670238 |
| 1J74 | A | SER | 94  | T | -6.324112  | 5.559797  | -12.058252 | -4.583452 |
| 1J74 | A | SER | 95  | T | -6.588172  | 5.034434  | -12.585718 | -4.638851 |
| 1J74 | A | GLY | 96  | T | -6.677748  | 4.766193  | -12.701998 | -4.656709 |
| 1J74 | A | MET | 97  | B | -7.007575  | 5.456374  | -12.452229 | -4.431500 |
| 1J74 | A | VAL | 98  | B | -7.105857  | 7.627508  | -10.463780 | -3.620111 |
| 1J74 | A | ASP | 99  | C | -6.832785  | 8.413690  | -9.706799  | -3.565362 |
| 1J74 | A | ALA | 100 | G | -6.802710  | 8.524365  | -9.692715  | -3.555390 |
| 1J74 | A | ARG | 101 | G | -6.810984  | 8.673314  | -9.550945  | -3.516862 |
| 1J74 | A | SER | 102 | G | -6.888298  | 8.933533  | -9.309905  | -3.492056 |
| 1J74 | A | ILE | 103 | C | -7.218955  | 9.827312  | -9.085907  | -3.559571 |
| 1J74 | A | PRO | 104 | H | -7.791186  | 11.558990 | -9.181728  | -3.447977 |
| 1J74 | A | VAL | 105 | H | -7.965066  | 12.223539 | -8.903080  | -3.458744 |
| 1J74 | A | LEU | 106 | H | -8.077895  | 12.338595 | -8.721074  | -3.433359 |

|      |   |     |     |   |            |           |            |           |
|------|---|-----|-----|---|------------|-----------|------------|-----------|
| 1J74 | A | ALA | 107 | H | -8.046923  | 12.076391 | -9.024550  | -3.531538 |
| 1J74 | A | LYS | 108 | H | -8.063499  | 11.796889 | -9.192407  | -3.570360 |
| 1J74 | A | TRP | 109 | C | -9.030317  | 12.736304 | -11.512210 | -4.456980 |
| 1J74 | A | GLN | 110 | T | -9.147357  | 11.290058 | -12.607595 | -4.678674 |
| 1J74 | A | ASN | 111 | T | -9.231832  | 10.660275 | -12.918157 | -4.731420 |
| 1J74 | A | SER | 112 | T | -9.892921  | 10.380041 | -14.056126 | -4.881538 |
| 1J74 | A | TYR | 113 | T | -10.590524 | 10.634637 | -15.146753 | -5.158802 |
| 1J74 | A | SER | 114 | C | -10.345835 | 12.248173 | -13.894201 | -4.979067 |
| 1J74 | A | ILE | 115 | H | -10.653464 | 15.274403 | -12.415135 | -4.783910 |
| 1J74 | A | LYS | 116 | H | -10.709415 | 15.572533 | -12.117102 | -4.724835 |
| 1J74 | A | VAL | 117 | H | -10.686901 | 15.534038 | -12.188050 | -4.719180 |
| 1J74 | A | VAL | 118 | H | -10.690079 | 15.542249 | -12.164206 | -4.711336 |
| 1J74 | A | LEU | 119 | H | -11.455021 | 16.944283 | -12.537697 | -4.731515 |
| 1J74 | A | GLN | 120 | H | -12.113935 | 15.329527 | -14.419727 | -4.816551 |
| 1J74 | A | GLU | 121 | H | -12.386635 | 15.260053 | -14.409936 | -4.784077 |
| 1J74 | A | LEU | 122 | H | -13.222194 | 17.049037 | -14.678207 | -5.049521 |
| 1J74 | A | ARG | 123 | H | -14.501633 | 15.548968 | -18.648787 | -5.585077 |
| 1J74 | A | ARG | 124 | H | -12.870465 | 12.082959 | -16.965875 | -5.171480 |
| 1J74 | A | LEU | 125 | H | -11.254473 | 11.696444 | -15.247203 | -5.320180 |
| 1J74 | A | MET | 126 | H | -10.020121 | 9.482834  | -15.198304 | -5.436498 |
| 1J74 | A | MET | 127 | H | -9.378474  | 7.842200  | -15.376953 | -5.383636 |
| 1J74 | A | SER | 128 | T | -9.310440  | 7.708691  | -15.538235 | -5.372641 |
| 1J74 | A | LYS | 129 | T | -9.286788  | 7.630623  | -15.635993 | -5.372669 |
| 1J74 | A | GLU | 130 | T | -9.306286  | 7.490863  | -15.659376 | -5.374450 |
| 1J74 | A | ASN | 131 | T | -9.482876  | 6.894646  | -15.844458 | -5.344159 |
| 1J74 | A | MET | 132 | T | -10.340993 | 6.675419  | -17.248577 | -5.287223 |
| 1J74 | A | LYS | 133 | T | -10.647237 | 7.345289  | -17.305861 | -5.165154 |
| 1J74 | A | LEU | 134 | T | -10.194396 | 8.260653  | -15.378651 | -4.729144 |
| 1J74 | A | PRO | 135 | C | -9.366961  | 7.971064  | -14.747745 | -4.999155 |
| 1J74 | A | GLN | 136 | C | -8.449697  | 7.743303  | -14.411963 | -5.534862 |
| 1J74 | A | PRO | 137 | C | -5.705014  | 6.523045  | -10.063113 | -4.841085 |
| 1J74 | A | PRO | 138 | T | -5.694527  | 6.622378  | -10.132395 | -4.894730 |
| 1J74 | A | GLU | 139 | T | -5.690086  | 6.664281  | -10.160759 | -4.913836 |
| 1J74 | A | GLY | 140 | T | -5.670533  | 6.791206  | -10.223298 | -4.956385 |
| 1J74 | A | GLN | 141 | T | -5.664072  | 6.849104  | -10.219838 | -4.956574 |
| 1J74 | A | THR | 142 | B | -4.798612  | 7.807607  | -6.832728  | -3.740288 |
| 1J74 | A | TYR | 143 | C | -4.798612  | 7.807607  | -6.832728  | -3.740288 |
| 1J74 | A | ASN | 144 | C | -4.798612  | 7.807607  | -6.832728  | -3.740288 |
| 1J74 | A | ASN | 145 | C | -4.798612  | 7.807607  | -6.832728  | -3.740288 |
| 1JHJ | A | ALA | 2   | C | -1.758074  | 2.966954  | -4.965381  | -3.133377 |
| 1JHJ | A | THR | 3   | T | -1.758074  | 2.966954  | -4.965381  | -3.133377 |
| 1JHJ | A | PRO | 4   | T | -1.758074  | 2.966954  | -4.965381  | -3.133377 |
| 1JHJ | A | ASN | 5   | T | -1.758074  | 2.966954  | -4.965381  | -3.133377 |
| 1JHJ | A | LYS | 6   | T | -2.677563  | 4.485025  | -5.266872  | -3.471519 |
| 1JHJ | A | THR | 7   | C | -4.405189  | 6.652628  | -8.636633  | -4.633694 |
| 1JHJ | A | PRO | 8   | C | -4.473647  | 6.332691  | -8.808421  | -4.591838 |
| 1JHJ | A | PRO | 9   | C | -4.898655  | 6.089589  | -9.736557  | -4.602832 |
| 1JHJ | A | GLY | 10  | C | -5.126496  | 5.569695  | -9.868302  | -4.284666 |
| 1JHJ | A | ALA | 11  | C | -5.421979  | 4.615174  | -8.804486  | -3.164837 |
| 1JHJ | A | ASP | 12  | C | -5.792822  | 4.433458  | -8.561378  | -2.983485 |
| 1JHJ | A | PRO | 13  | H | -7.169223  | 7.389759  | -9.190356  | -3.205276 |
| 1JHJ | A | LYS | 14  | H | -8.235938  | 8.132156  | -11.372019 | -3.919900 |
| 1JHJ | A | GLN | 15  | H | -8.974015  | 8.970792  | -13.125910 | -4.307406 |
| 1JHJ | A | LEU | 16  | H | -7.923037  | 7.317754  | -12.054477 | -4.313518 |
| 1JHJ | A | GLU | 17  | H | -6.182166  | 3.974240  | -10.073873 | -3.493573 |
| 1JHJ | A | ARG | 18  | H | -5.496030  | 4.973921  | -8.043629  | -2.874168 |
| 1JHJ | A | THR | 19  | H | -5.349045  | 5.271349  | -7.869380  | -2.799907 |
| 1JHJ | A | GLY | 20  | C | -5.346367  | 5.286989  | -7.878420  | -2.802871 |
| 1JHJ | A | THR | 21  | C | -5.352745  | 5.272014  | -7.833481  | -2.786256 |
| 1JHJ | A | VAL | 22  | E | -5.509872  | 5.730633  | -7.184806  | -2.585208 |
| 1JHJ | A | ARG | 23  | E | -6.226859  | 6.435263  | -7.356888  | -2.573198 |
| 1JHJ | A | GLU | 24  | E | -8.251288  | 9.560610  | -10.438175 | -3.658534 |
| 1JHJ | A | ILE | 25  | C | -8.129934  | 8.479880  | -10.731465 | -3.648604 |
| 1JHJ | A | GLY | 26  | G | -7.915296  | 6.812827  | -11.814061 | -3.806792 |
| 1JHJ | A | SER | 27  | G | -7.968582  | 6.303052  | -11.984916 | -3.788875 |
| 1JHJ | A | GLN | 28  | G | -7.981189  | 6.266944  | -11.963104 | -3.790516 |
| 1JHJ | A | ALA | 29  | E | -7.980529  | 6.312592  | -11.924864 | -3.777740 |
| 1JHJ | A | VAL | 30  | E | -8.483485  | 4.887612  | -13.692555 | -4.165090 |
| 1JHJ | A | TRP | 31  | E | -10.229203 | 11.137619 | -11.892653 | -3.468194 |
| 1JHJ | A | SER | 32  | E | -10.059698 | 9.506286  | -12.569550 | -3.534696 |
| 1JHJ | A | LEU | 33  | E | -9.432204  | 9.916657  | -11.863263 | -3.811117 |
| 1JHJ | A | SER | 34  | T | -8.434464  | 6.431592  | -11.924510 | -3.676884 |
| 1JHJ | A | SER | 35  | T | -6.483428  | 4.666460  | -9.991140  | -3.620035 |
| 1JHJ | A | CYS | 36  | T | -4.690402  | 6.902394  | -8.083544  | -4.460744 |
| 1JHJ | A | LYS | 37  | B | -4.556127  | 6.690107  | -8.228257  | -4.385518 |
| 1JHJ | A | PRO | 38  | T | -4.548228  | 6.707408  | -8.231802  | -4.371905 |
| 1JHJ | A | GLY | 39  | T | -4.547221  | 6.713891  | -8.232422  | -4.371090 |
| 1JHJ | A | PHE | 40  | B | -4.569321  | 6.794609  | -8.168318  | -4.399608 |
| 1JHJ | A | GLY | 41  | T | -5.448963  | 6.071490  | -8.813456  | -4.044279 |
| 1JHJ | A | VAL | 42  | G | -6.907852  | 8.435169  | -9.035578  | -3.591218 |
| 1JHJ | A | ASP | 43  | G | -7.660342  | 9.503304  | -10.337121 | -4.179943 |

|      |   |     |     |   |            |           |            |           |
|------|---|-----|-----|---|------------|-----------|------------|-----------|
| 1JHJ | A | GLN | 44  | G | -8.134069  | 10.633570 | -10.812758 | -4.666212 |
| 1JHJ | A | LEU | 45  | G | -8.157548  | 10.634802 | -10.770076 | -4.692154 |
| 1JHJ | A | ARG | 46  | C | -11.776363 | 9.822321  | -16.903627 | -5.050575 |
| 1JHJ | A | ASP | 47  | C | -8.669468  | 5.849054  | -13.637098 | -4.663575 |
| 1JHJ | A | ASP | 48  | C | -7.645834  | 5.955524  | -11.828218 | -4.222735 |
| 1JHJ | A | ASN | 49  | T | -7.572086  | 6.500384  | -11.684808 | -4.230971 |
| 1JHJ | A | LEU | 50  | T | -7.572009  | 6.502044  | -11.684729 | -4.231017 |
| 1JHJ | A | GLU | 51  | T | -7.572249  | 6.501435  | -11.681899 | -4.230391 |
| 1JHJ | A | THR | 52  | T | -7.673055  | 6.623860  | -11.322094 | -4.150601 |
| 1JHJ | A | TYR | 53  | C | -8.842177  | 10.620286 | -10.606986 | -4.293783 |
| 1JHJ | A | TRP | 54  | E | -12.544617 | 15.643647 | -13.966681 | -4.837212 |
| 1JHJ | A | GLN | 55  | E | -11.287891 | 6.403043  | -16.900410 | -4.906524 |
| 1JHJ | A | SER | 56  | C | -9.983913  | 6.188716  | -16.640506 | -5.447103 |
| 1JHJ | A | ASP | 57  | C | -8.096725  | 5.255636  | -12.761859 | -4.210143 |
| 1JHJ | A | GLY | 58  | C | -8.057895  | 5.305134  | -12.811752 | -4.187875 |
| 1JHJ | A | SER | 59  | T | -8.054271  | 5.328871  | -12.815405 | -4.184954 |
| 1JHJ | A | GLN | 60  | T | -8.056666  | 5.326000  | -12.798704 | -4.181989 |
| 1JHJ | A | PRO | 61  | T | -8.077227  | 5.298483  | -12.663875 | -4.134751 |
| 1JHJ | A | HIS | 62  | E | -9.631878  | 6.377668  | -13.554054 | -3.853633 |
| 1JHJ | A | LEU | 63  | E | -11.010037 | 9.671586  | -13.613740 | -3.806273 |
| 1JHJ | A | VAL | 64  | E | -12.410333 | 14.092256 | -14.990272 | -4.526626 |
| 1JHJ | A | ASN | 65  | E | -12.351080 | 14.621275 | -14.475738 | -4.413653 |
| 1JHJ | A | ILE | 66  | E | -11.880301 | 15.040815 | -13.008230 | -4.088893 |
| 1JHJ | A | GLN | 67  | E | -11.738671 | 14.351650 | -13.288385 | -4.076958 |
| 1JHJ | A | PHE | 68  | E | -10.700434 | 11.676479 | -11.864492 | -3.444966 |
| 1JHJ | A | ARG | 69  | E | -8.595302  | 8.840353  | -10.231026 | -3.437704 |
| 1JHJ | A | ARG | 70  | E | -8.580276  | 8.915526  | -10.279802 | -3.454803 |
| 1JHJ | A | LYS | 71  | E | -8.572352  | 8.987576  | -10.325105 | -3.486497 |
| 1JHJ | A | THR | 72  | E | -8.427495  | 10.109451 | -10.142169 | -3.646959 |
| 1JHJ | A | THR | 73  | E | -8.382963  | 10.600516 | -9.946483  | -3.647926 |
| 1JHJ | A | VAL | 74  | C | -8.954418  | 14.455745 | -9.422638  | -4.007654 |
| 1JHJ | A | LYS | 75  | C | -8.934943  | 14.627272 | -9.311550  | -3.984642 |
| 1JHJ | A | THR | 76  | E | -8.951389  | 14.643587 | -9.189982  | -3.939629 |
| 1JHJ | A | LEU | 77  | E | -9.393352  | 15.203313 | -8.849126  | -3.621296 |
| 1JHJ | A | CYS | 78  | E | -9.791154  | 14.616932 | -9.467506  | -3.646454 |
| 1JHJ | A | ILE | 79  | E | -10.406344 | 15.310962 | -9.784958  | -3.817680 |
| 1JHJ | A | TYR | 80  | E | -12.089244 | 18.230297 | -12.217520 | -4.483456 |
| 1JHJ | A | ALA | 81  | E | -11.110247 | 11.827223 | -14.507035 | -4.922710 |
| 1JHJ | A | ASP | 82  | E | -11.022071 | 11.029229 | -15.072671 | -5.013601 |
| 1JHJ | A | TYR | 83  | G | -10.671501 | 9.542407  | -15.112071 | -4.744958 |
| 1JHJ | A | LYS | 84  | G | -9.662213  | 6.378350  | -14.106666 | -4.038647 |
| 1JHJ | A | SER | 85  | G | -9.655164  | 6.401738  | -14.127996 | -4.039662 |
| 1JHJ | A | ASP | 86  | C | -9.669967  | 6.276571  | -14.136785 | -4.020353 |
| 1JHJ | A | GLU | 87  | G | -9.650777  | 6.551998  | -14.005565 | -3.994332 |
| 1JHJ | A | SER | 88  | G | -9.699097  | 6.455339  | -13.907125 | -3.956778 |
| 1JHJ | A | TYR | 89  | G | -10.892122 | 11.782266 | -14.060070 | -4.453884 |
| 1JHJ | A | THR | 90  | C | -10.759023 | 12.745931 | -13.122663 | -4.241581 |
| 1JHJ | A | PRO | 91  | E | -10.897589 | 13.727096 | -12.286937 | -3.926136 |
| 1JHJ | A | SER | 92  | E | -11.169011 | 14.247177 | -12.302847 | -3.938366 |
| 1JHJ | A | LYS | 93  | E | -11.185177 | 14.347788 | -12.242042 | -3.947986 |
| 1JHJ | A | ILE | 94  | E | -11.196278 | 14.392199 | -12.173245 | -3.922229 |
| 1JHJ | A | SER | 95  | E | -11.518704 | 13.689901 | -13.567508 | -4.183358 |
| 1JHJ | A | VAL | 96  | E | -10.678653 | 12.423431 | -13.316419 | -4.620363 |
| 1JHJ | A | ARG | 97  | E | -10.309362 | 11.047013 | -13.783864 | -4.648042 |
| 1JHJ | A | VAL | 98  | E | -9.381780  | 10.290381 | -12.563163 | -4.550515 |
| 1JHJ | A | GLY | 99  | E | -7.239346  | 6.329272  | -10.578415 | -4.035549 |
| 1JHJ | A | ASN | 100 | C | -6.367652  | 6.049879  | -9.766067  | -3.897421 |
| 1JHJ | A | ASN | 101 | T | -6.180972  | 6.848863  | -9.909287  | -4.170487 |
| 1JHJ | A | PHE | 102 | T | -6.134046  | 7.007168  | -9.911566  | -4.164812 |
| 1JHJ | A | HIS | 103 | T | -6.076046  | 7.059573  | -9.933707  | -4.162243 |
| 1JHJ | A | ASN | 104 | T | -6.155156  | 7.227357  | -9.850232  | -4.182981 |
| 1JHJ | A | LEU | 105 | E | -6.611271  | 8.705832  | -10.233123 | -4.562233 |
| 1JHJ | A | GLN | 106 | E | -7.042655  | 8.409868  | -10.284959 | -4.164049 |
| 1JHJ | A | GLU | 107 | E | -7.281514  | 8.219311  | -10.468668 | -4.186873 |
| 1JHJ | A | ILE | 108 | E | -8.048027  | 9.846109  | -11.169933 | -4.257890 |
| 1JHJ | A | ARG | 109 | E | -8.277169  | 9.863595  | -11.452901 | -4.344443 |
| 1JHJ | A | GLN | 110 | E | -8.150205  | 9.920923  | -11.085055 | -4.144367 |
| 1JHJ | A | LEU | 111 | E | -8.607633  | 10.916566 | -10.504916 | -3.748994 |
| 1JHJ | A | GLU | 112 | E | -8.816276  | 11.066160 | -10.534755 | -3.779152 |
| 1JHJ | A | LEU | 113 | T | -8.901359  | 11.163687 | -10.494610 | -3.851658 |
| 1JHJ | A | VAL | 114 | T | -8.870290  | 11.272951 | -10.704783 | -3.991583 |
| 1JHJ | A | GLU | 115 | T | -9.763584  | 14.106643 | -13.770888 | -5.975565 |
| 1JHJ | A | PRO | 116 | T | -10.156441 | 13.856141 | -13.698930 | -5.702688 |
| 1JHJ | A | SER | 117 | E | -10.418248 | 13.358144 | -14.074447 | -5.851847 |
| 1JHJ | A | GLY | 118 | E | -10.359299 | 13.732323 | -13.435606 | -5.530181 |
| 1JHJ | A | TRP | 119 | E | -11.073852 | 17.004197 | -10.260505 | -3.688332 |
| 1JHJ | A | ILE | 120 | E | -9.662801  | 15.339028 | -7.969909  | -3.113160 |
| 1JHJ | A | HIS | 121 | E | -9.279187  | 15.470258 | -10.159811 | -4.761939 |
| 1JHJ | A | VAL | 122 | E | -8.219319  | 14.999153 | -10.964488 | -6.535982 |
| 1JHJ | A | PRO | 123 | E | -7.818198  | 13.706978 | -11.451838 | -6.465268 |
| 1JHJ | A | LEU | 124 | C | -6.342341  | 9.539442  | -8.184003  | -4.119017 |

|      |   |     |     |   |            |           |            |           |
|------|---|-----|-----|---|------------|-----------|------------|-----------|
| 1JHJ | A | THR | 125 | B | -3.180646  | 4.046400  | -5.616389  | -3.367575 |
| 1JHJ | A | ASP | 126 | T | -0.795237  | 2.394558  | -4.372645  | -3.707827 |
| 1JHJ | A | ASN | 127 | T | -0.608596  | 3.195616  | -4.514612  | -3.906104 |
| 1JHJ | A | HIS | 128 | T | -0.608053  | 3.200276  | -4.518229  | -3.907045 |
| 1JHJ | A | LYS | 129 | T | -0.608068  | 3.200079  | -4.518052  | -3.906957 |
| 1JHJ | A | LYS | 130 | C | -0.622233  | 3.140623  | -4.435792  | -3.871275 |
| 1JHJ | A | PRO | 131 | B | -1.666079  | 4.272621  | -2.983174  | -2.803800 |
| 1JHJ | A | THR | 132 | C | -5.059444  | 6.858583  | -6.257208  | -2.954345 |
| 1JHJ | A | ARG | 133 | E | -6.521513  | 9.384630  | -7.854319  | -3.643042 |
| 1JHJ | A | THR | 134 | E | -8.103351  | 11.389884 | -11.613568 | -5.697263 |
| 1JHJ | A | PHE | 135 | E | -10.902768 | 15.098843 | -14.595754 | -6.606759 |
| 1JHJ | A | MET | 136 | E | -12.660624 | 16.249414 | -14.517226 | -4.897363 |
| 1JHJ | A | ILE | 137 | E | -12.341981 | 16.765678 | -12.559110 | -4.097190 |
| 1JHJ | A | GLN | 138 | E | -12.229402 | 16.443119 | -12.472726 | -3.979814 |
| 1JHJ | A | ILE | 139 | E | -10.125397 | 14.203642 | -8.656204  | -2.870677 |
| 1JHJ | A | ALA | 140 | E | -10.006786 | 13.635063 | -9.317055  | -3.003429 |
| 1JHJ | A | VAL | 141 | E | -9.997023  | 13.597383 | -9.430223  | -3.040784 |
| 1JHJ | A | LEU | 142 | E | -9.994459  | 13.502117 | -9.524401  | -3.067591 |
| 1JHJ | A | ALA | 143 | E | -9.720414  | 10.509792 | -11.678244 | -3.567762 |
| 1JHJ | A | ASN | 144 | E | -8.333862  | 5.371448  | -13.369683 | -4.669002 |
| 1JHJ | A | HIS | 145 | T | -8.286841  | 5.293005  | -13.485206 | -4.641026 |
| 1JHJ | A | GLN | 146 | T | -8.189080  | 5.215258  | -13.833186 | -4.706325 |
| 1JHJ | A | ASN | 147 | T | -8.162239  | 5.246385  | -13.881104 | -4.693101 |
| 1JHJ | A | GLY | 148 | T | -8.178431  | 5.238513  | -13.841651 | -4.700928 |
| 1JHJ | A | ARG | 149 | C | -8.957478  | 5.108053  | -15.313700 | -4.731785 |
| 1JHJ | A | ASP | 150 | C | -9.141926  | 5.103629  | -15.579644 | -4.918133 |
| 1JHJ | A | THR | 151 | C | -9.998135  | 5.996352  | -14.949768 | -4.420736 |
| 1JHJ | A | HIS | 152 | E | -14.151464 | 9.392616  | -18.697025 | -4.564754 |
| 1JHJ | A | MET | 153 | E | -15.582230 | 13.925773 | -18.741594 | -4.925621 |
| 1JHJ | A | ARG | 154 | C | -16.695221 | 16.802293 | -20.334873 | -5.702444 |
| 1JHJ | A | GLN | 155 | E | -17.149127 | 17.996473 | -20.675086 | -5.916835 |
| 1JHJ | A | ILE | 156 | E | -15.210616 | 25.097430 | -15.500549 | -7.153514 |
| 1JHJ | A | LYS | 157 | E | -13.173218 | 21.160887 | -12.887342 | -5.736198 |
| 1JHJ | A | ILE | 158 | E | -9.233319  | 16.418223 | -6.851300  | -3.356219 |
| 1JHJ | A | TYR | 159 | E | -7.160463  | 12.148940 | -5.552271  | -2.590496 |
| 1JHJ | A | THR | 160 | E | -7.160463  | 12.148940 | -5.552271  | -2.590496 |
| 1JHJ | A | PRO | 161 | E | -7.160463  | 12.148940 | -5.552271  | -2.590496 |
| 1JHJ | A | VAL | 162 | C | -7.160463  | 12.148940 | -5.552271  | -2.590496 |
| 1JK3 | A | GLY | 106 | C | -4.989832  | 9.131896  | -6.814544  | -3.565233 |
| 1JK3 | A | PRO | 107 | C | -4.989832  | 9.131896  | -6.814544  | -3.565233 |
| 1JK3 | A | VAL | 108 | C | -4.989832  | 9.131896  | -6.814544  | -3.565233 |
| 1JK3 | A | TRP | 109 | C | -4.989832  | 9.131896  | -6.814544  | -3.565233 |
| 1JK3 | A | ARG | 110 | C | -4.875737  | 9.284946  | -6.842323  | -3.713272 |
| 1JK3 | A | LYS | 111 | C | -5.405196  | 9.814288  | -7.509005  | -4.082228 |
| 1JK3 | A | HIS | 112 | C | -5.479272  | 9.744838  | -7.301709  | -4.010833 |
| 1JK3 | A | TYR | 113 | E | -5.499954  | 9.676051  | -7.192384  | -3.962467 |
| 1JK3 | A | ILE | 114 | E | -5.510742  | 9.603107  | -7.120261  | -3.918501 |
| 1JK3 | A | THR | 115 | E | -8.070708  | 11.187555 | -10.715730 | -4.768828 |
| 1JK3 | A | TYR | 116 | E | -10.457646 | 15.863701 | -11.649597 | -5.008756 |
| 1JK3 | A | ARG | 117 | E | -12.196968 | 16.167735 | -15.211327 | -5.446171 |
| 1JK3 | A | ILE | 118 | E | -10.348005 | 14.653226 | -13.037505 | -5.661805 |
| 1JK3 | A | ASN | 119 | C | -9.672784  | 12.565977 | -13.452216 | -5.524361 |
| 1JK3 | A | ASN | 120 | C | -9.638845  | 12.478802 | -13.580222 | -5.523374 |
| 1JK3 | A | TYR | 121 | C | -9.489353  | 12.894360 | -13.463155 | -5.548616 |
| 1JK3 | A | THR | 122 | T | -8.213679  | 9.734761  | -12.564894 | -5.252035 |
| 1JK3 | A | PRO | 123 | T | -8.045279  | 9.569466  | -12.547088 | -5.120088 |
| 1JK3 | A | ASP | 124 | T | -7.932487  | 9.476967  | -12.578634 | -5.092008 |
| 1JK3 | A | MET | 125 | T | -6.766225  | 9.289523  | -10.572129 | -4.937256 |
| 1JK3 | A | ASN | 126 | C | -6.254675  | 9.652738  | -9.546001  | -4.590175 |
| 1JK3 | A | ARG | 127 | H | -6.272329  | 9.668649  | -9.458387  | -4.569495 |
| 1JK3 | A | GLU | 128 | H | -6.278574  | 9.677348  | -9.427766  | -4.568691 |
| 1JK3 | A | ASP | 129 | H | -6.286032  | 9.681166  | -9.384255  | -4.562694 |
| 1JK3 | A | VAL | 130 | H | -6.571561  | 9.945406  | -8.849393  | -4.345899 |
| 1JK3 | A | ASP | 131 | H | -9.226135  | 11.801370 | -12.840250 | -4.944860 |
| 1JK3 | A | TYR | 132 | H | -9.554192  | 12.335813 | -13.136854 | -5.165271 |
| 1JK3 | A | ALA | 133 | H | -10.298251 | 14.065771 | -13.059504 | -4.722654 |
| 1JK3 | A | ILE | 134 | H | -10.497192 | 14.489184 | -12.746300 | -4.551199 |
| 1JK3 | A | ARG | 135 | H | -10.748811 | 13.527678 | -13.572533 | -4.539144 |
| 1JK3 | A | LYS | 136 | H | -10.835577 | 13.585731 | -13.535894 | -4.540427 |
| 1JK3 | A | ALA | 137 | H | -11.302291 | 14.475724 | -13.704721 | -4.610508 |
| 1JK3 | A | PHE | 138 | H | -11.727693 | 14.915779 | -14.184785 | -4.882423 |
| 1JK3 | A | GLN | 139 | H | -11.789356 | 14.269841 | -14.532578 | -4.917324 |
| 1JK3 | A | VAL | 140 | H | -11.502854 | 14.206011 | -13.660170 | -4.613795 |
| 1JK3 | A | TRP | 141 | H | -10.404876 | 14.267646 | -12.597823 | -4.981565 |
| 1JK3 | A | SER | 142 | H | -8.726692  | 9.831670  | -11.957640 | -4.452709 |
| 1JK3 | A | ASN | 143 | H | -7.936930  | 11.604144 | -10.225638 | -4.385758 |
| 1JK3 | A | VAL | 144 | C | -7.893505  | 11.720643 | -10.274716 | -4.391152 |
| 1JK3 | A | THR | 145 | C | -7.849475  | 12.101605 | -10.215365 | -4.429610 |
| 1JK3 | A | PRO | 146 | C | -7.847264  | 12.129093 | -10.201047 | -4.424579 |
| 1JK3 | A | LEU | 147 | C | -7.987776  | 12.838298 | -9.744735  | -4.428942 |
| 1JK3 | A | LYS | 148 | E | -8.903440  | 15.269327 | -10.520903 | -4.781661 |

|      |   |     |     |   |            |           |            |           |
|------|---|-----|-----|---|------------|-----------|------------|-----------|
| 1JK3 | A | PHE | 149 | E | -8.762108  | 15.240065 | -10.649585 | -5.069965 |
| 1JK3 | A | SER | 150 | E | -6.473997  | 7.856559  | -10.183050 | -4.619555 |
| 1JK3 | A | LYS | 151 | E | -4.636156  | 6.379599  | -9.090087  | -4.942658 |
| 1JK3 | A | ILE | 152 | C | -4.328112  | 5.291522  | -9.530315  | -4.790409 |
| 1JK3 | A | ASN | 153 | C | -4.016804  | 4.939948  | -9.469347  | -4.694748 |
| 1JK3 | A | THR | 154 | C | -4.008132  | 4.938457  | -9.502197  | -4.693636 |
| 1JK3 | A | GLY | 155 | C | -4.016597  | 4.898071  | -9.494524  | -4.694716 |
| 1JK3 | A | MET | 156 | C | -4.259296  | 4.180294  | -9.718327  | -4.558065 |
| 1JK3 | A | ALA | 157 | T | -4.524671  | 4.454453  | -9.458729  | -4.552682 |
| 1JK3 | A | ASP | 158 | T | -6.460404  | 5.201403  | -11.724966 | -4.616941 |
| 1JK3 | A | ILE | 159 | E | -7.958022  | 8.308360  | -12.005488 | -4.652220 |
| 1JK3 | A | LEU | 160 | E | -9.718096  | 11.567047 | -12.506962 | -4.476001 |
| 1JK3 | A | VAL | 161 | E | -11.064905 | 15.451072 | -12.717814 | -4.316871 |
| 1JK3 | A | VAL | 162 | E | -11.246503 | 15.159117 | -13.178451 | -4.276327 |
| 1JK3 | A | PHE | 163 | E | -10.131654 | 12.182916 | -12.675327 | -4.377046 |
| 1JK3 | A | ALA | 164 | E | -8.688616  | 8.046525  | -13.227645 | -4.555719 |
| 1JK3 | A | ARG | 165 | T | -6.107616  | 5.793504  | -10.684374 | -4.531699 |
| 1JK3 | A | GLY | 166 | T | -5.406133  | 5.351098  | -10.676824 | -4.713459 |
| 1JK3 | A | ALA | 167 | T | -4.371712  | 5.135588  | -9.308266  | -4.636677 |
| 1JK3 | A | HIS | 168 | T | -4.236462  | 5.370398  | -9.383099  | -4.693759 |
| 1JK3 | A | GLY | 169 | C | -3.860967  | 5.418016  | -8.908378  | -4.577631 |
| 1JK3 | A | ASP | 170 | T | -3.873201  | 5.422301  | -8.869164  | -4.578476 |
| 1JK3 | A | PHE | 171 | T | -3.904742  | 5.439408  | -8.769293  | -4.565965 |
| 1JK3 | A | HIS | 172 | T | -4.183986  | 5.645561  | -8.611957  | -4.529145 |
| 1JK3 | A | ALA | 173 | T | -4.306458  | 5.498487  | -8.368215  | -4.440122 |
| 1JK3 | A | PHE | 174 | C | -7.353260  | 11.419742 | -10.230289 | -4.661071 |
| 1JK3 | A | ASP | 175 | C | -5.518971  | 1.585217  | -12.624634 | -4.899624 |
| 1JK3 | A | GLY | 176 | C | -5.284293  | 1.931135  | -12.421220 | -4.777070 |
| 1JK3 | A | LYS | 177 | C | -5.203748  | 2.401237  | -12.235460 | -4.732964 |
| 1JK3 | A | GLY | 178 | T | -4.941208  | 4.418791  | -10.873104 | -4.579138 |
| 1JK3 | A | GLY | 179 | T | -4.935750  | 4.484408  | -10.856318 | -4.576749 |
| 1JK3 | A | ILE | 180 | T | -5.207214  | 6.259644  | -9.816899  | -4.386086 |
| 1JK3 | A | LEU | 181 | T | -5.411676  | 7.691159  | -8.924251  | -4.328072 |
| 1JK3 | A | ALA | 182 | E | -5.529515  | 8.148309  | -8.474814  | -4.305367 |
| 1JK3 | A | HIS | 183 | E | -7.547450  | 11.379437 | -9.766162  | -4.398548 |
| 1JK3 | A | ALA | 184 | E | -7.770482  | 11.898226 | -9.747938  | -4.238897 |
| 1JK3 | A | PHE | 185 | E | -7.693348  | 11.351030 | -10.013837 | -4.216403 |
| 1JK3 | A | GLY | 186 | C | -5.102984  | 5.492548  | -8.894781  | -4.021305 |
| 1JK3 | A | PRO | 187 | C | -4.719092  | 5.438204  | -8.677408  | -3.828947 |
| 1JK3 | A | GLY | 188 | C | -3.890912  | 3.879893  | -8.750849  | -4.066052 |
| 1JK3 | A | SER | 189 | T | -3.809134  | 3.955398  | -8.830437  | -4.072123 |
| 1JK3 | A | GLY | 190 | T | -3.806967  | 3.958874  | -8.843418  | -4.074317 |
| 1JK3 | A | ILE | 191 | T | -3.876637  | 3.775938  | -8.836427  | -4.079851 |
| 1JK3 | A | GLY | 192 | T | -3.949285  | 3.565102  | -8.885479  | -4.138820 |
| 1JK3 | A | GLY | 193 | T | -5.001286  | 4.537665  | -9.436728  | -4.118288 |
| 1JK3 | A | ASP | 194 | E | -7.061114  | 5.415829  | -12.289681 | -4.605915 |
| 1JK3 | A | ALA | 195 | E | -8.937578  | 7.974620  | -13.148680 | -4.404999 |
| 1JK3 | A | HIS | 196 | E | -11.268812 | 10.053459 | -15.847266 | -4.985061 |
| 1JK3 | A | PHE | 197 | E | -12.963733 | 15.269612 | -15.195882 | -4.983273 |
| 1JK3 | A | ASP | 198 | E | -14.954961 | 16.073158 | -18.565299 | -5.436903 |
| 1JK3 | A | GLU | 199 | T | -15.548063 | 15.597775 | -20.457342 | -6.012499 |
| 1JK3 | A | ASP | 200 | T | -15.554170 | 15.139983 | -21.293436 | -6.439204 |
| 1JK3 | A | GLU | 201 | T | -14.470623 | 16.511703 | -18.409125 | -6.189390 |
| 1JK3 | A | PHE | 202 | C | -12.052530 | 14.440877 | -14.729126 | -5.241431 |
| 1JK3 | A | TRP | 203 | E | -10.994688 | 13.605093 | -13.912823 | -5.107455 |
| 1JK3 | A | THR | 204 | E | -6.574519  | 7.051679  | -10.797355 | -4.712019 |
| 1JK3 | A | THR | 205 | C | -4.837064  | 5.913637  | -9.444104  | -4.813960 |
| 1JK3 | A | HIS | 206 | C | -4.726293  | 6.039284  | -9.582905  | -4.833604 |
| 1JK3 | A | SER | 207 | C | -4.723002  | 6.048463  | -9.601016  | -4.836442 |
| 1JK3 | A | GLY | 208 | C | -4.722903  | 6.049170  | -9.601766  | -4.836557 |
| 1JK3 | A | GLY | 209 | C | -4.749521  | 6.003113  | -9.546629  | -4.842145 |
| 1JK3 | A | THR | 210 | E | -5.754962  | 6.684724  | -10.338896 | -4.940188 |
| 1JK3 | A | ASN | 211 | E | -7.781401  | 7.797917  | -12.887240 | -5.346909 |
| 1JK3 | A | LEU | 212 | H | -9.792369  | 10.841638 | -14.032259 | -5.465794 |
| 1JK3 | A | PHE | 213 | H | -11.469511 | 18.327943 | -11.941890 | -4.626478 |
| 1JK3 | A | LEU | 214 | H | -11.146265 | 16.426813 | -12.103205 | -4.326240 |
| 1JK3 | A | THR | 215 | H | -10.433987 | 13.839498 | -12.095803 | -4.090287 |
| 1JK3 | A | ALA | 216 | H | -10.321544 | 13.956029 | -12.007496 | -4.022858 |
| 1JK3 | A | VAL | 217 | H | -10.218087 | 13.761683 | -12.129592 | -4.036373 |
| 1JK3 | A | HIS | 218 | H | -10.236315 | 13.419568 | -12.306967 | -4.044472 |
| 1JK3 | A | ALA | 219 | H | -10.276658 | 13.291861 | -12.371271 | -4.053822 |
| 1JK3 | A | ILE | 220 | H | -10.684253 | 13.936894 | -12.829048 | -4.184188 |
| 1JK3 | A | GLY | 221 | H | -10.773141 | 12.978765 | -13.932195 | -4.549825 |
| 1JK3 | A | HIS | 222 | H | -11.120678 | 12.457803 | -15.123440 | -4.881266 |
| 1JK3 | A | SER | 223 | H | -9.564909  | 11.848468 | -12.578249 | -4.888464 |
| 1JK3 | A | LEU | 224 | H | -7.606686  | 12.180616 | -9.617269  | -4.767148 |
| 1JK3 | A | GLY | 225 | C | -7.092426  | 10.419513 | -10.554125 | -4.942996 |
| 1JK3 | A | LEU | 226 | C | -7.011029  | 10.261351 | -10.690631 | -4.896878 |
| 1JK3 | A | GLY | 227 | C | -6.564167  | 8.740372  | -10.945386 | -4.833647 |
| 1JK3 | A | HIS | 228 | C | -6.458532  | 8.738653  | -10.902842 | -4.768044 |
| 1JK3 | A | SER | 229 | C | -6.388446  | 7.842436  | -11.156686 | -4.650828 |

|      |   |     |     |   |            |           |            |           |
|------|---|-----|-----|---|------------|-----------|------------|-----------|
| 1JK3 | A | SER | 230 | C | -5.596828  | 7.961577  | -8.915808  | -4.144313 |
| 1JK3 | A | ASP | 231 | T | -5.571794  | 8.027266  | -8.929832  | -4.140260 |
| 1JK3 | A | PRO | 232 | T | -5.633278  | 8.099867  | -8.685610  | -4.070409 |
| 1JK3 | A | LYS | 233 | T | -5.658569  | 8.068433  | -8.596190  | -4.054045 |
| 1JK3 | A | ALA | 234 | T | -5.700628  | 8.166359  | -8.400839  | -4.038415 |
| 1JK3 | A | VAL | 235 | T | -7.306879  | 9.505887  | -9.806455  | -4.168095 |
| 1JK3 | A | MET | 236 | T | -9.781568  | 12.085710 | -12.680554 | -4.619923 |
| 1JK3 | A | PHE | 237 | T | -9.366260  | 13.208991 | -11.093633 | -4.420455 |
| 1JK3 | A | PRO | 238 | C | -8.863939  | 14.477389 | -10.699883 | -4.808085 |
| 1JK3 | A | THR | 239 | C | -8.726581  | 14.554946 | -10.748650 | -4.830773 |
| 1JK3 | A | TYR | 240 | C | -8.725220  | 14.609640 | -10.771875 | -4.863224 |
| 1JK3 | A | LYS | 241 | C | -8.296017  | 14.218032 | -10.818935 | -5.042535 |
| 1JK3 | A | TYR | 242 | C | -6.214583  | 11.444187 | -8.081501  | -4.671207 |
| 1JK3 | A | VAL | 243 | C | -4.611279  | 6.980032  | -7.580672  | -3.997250 |
| 1JK3 | A | ASP | 244 | T | -4.538224  | 7.439804  | -7.541717  | -4.033729 |
| 1JK3 | A | ILE | 245 | T | -4.429387  | 8.049653  | -7.275080  | -3.974920 |
| 1JK3 | A | ASN | 246 | T | -4.346791  | 8.819752  | -6.956076  | -3.969901 |
| 1JK3 | A | THR | 247 | T | -4.371547  | 8.713436  | -6.911315  | -3.939933 |
| 1JK3 | A | PHE | 248 | T | -4.948618  | 12.099138 | -5.864189  | -3.922178 |
| 1JK3 | A | ARG | 249 | C | -5.104512  | 12.443999 | -5.453736  | -3.805380 |
| 1JK3 | A | LEU | 250 | C | -5.544422  | 13.957162 | -4.910545  | -3.943076 |
| 1JK3 | A | SER | 251 | C | -8.079655  | 13.868276 | -9.518872  | -4.282573 |
| 1JK3 | A | ALA | 252 | H | -8.404615  | 13.095428 | -10.175795 | -4.339890 |
| 1JK3 | A | ASP | 253 | H | -9.124947  | 9.289218  | -12.907290 | -4.464622 |
| 1JK3 | A | ASP | 254 | H | -10.531389 | 8.332354  | -16.304347 | -4.718828 |
| 1JK3 | A | ILE | 255 | H | -10.426930 | 8.634306  | -15.817765 | -4.537186 |
| 1JK3 | A | ARG | 256 | H | -10.499719 | 8.669729  | -15.654246 | -4.469552 |
| 1JK3 | A | GLY | 257 | H | -10.677078 | 11.227530 | -15.205689 | -4.963687 |
| 1JK3 | A | ILE | 258 | H | -10.566620 | 14.452863 | -13.747846 | -5.293856 |
| 1JK3 | A | GLN | 259 | H | -9.895025  | 13.603996 | -12.677932 | -4.979926 |
| 1JK3 | A | SER | 260 | H | -8.255999  | 11.666255 | -9.477877  | -3.744505 |
| 1JK3 | A | LEU | 261 | H | -8.255999  | 11.666255 | -9.477877  | -3.744505 |
| 1JK3 | A | TYR | 262 | C | -8.255999  | 11.666255 | -9.477877  | -3.744505 |
| 1JK3 | A | GLY | 263 | C | -8.255999  | 11.666255 | -9.477877  | -3.744505 |
| 1JSF | A | LYS | 1   | C | -8.805779  | 8.918315  | -11.890694 | -4.074837 |
| 1JSF | A | VAL | 2   | B | -8.805779  | 8.918315  | -11.890694 | -4.074837 |
| 1JSF | A | PHE | 3   | C | -8.805779  | 8.918315  | -11.890694 | -4.074837 |
| 1JSF | A | GLU | 4   | C | -8.805779  | 8.918315  | -11.890694 | -4.074837 |
| 1JSF | A | ARG | 5   | H | -12.222708 | 11.182183 | -16.799053 | -5.201198 |
| 1JSF | A | CYS | 6   | H | -12.613424 | 11.356600 | -17.208129 | -5.055362 |
| 1JSF | A | GLU | 7   | H | -11.922792 | 12.911073 | -15.433625 | -4.907682 |
| 1JSF | A | LEU | 8   | H | -11.646726 | 13.938922 | -14.601421 | -4.736082 |
| 1JSF | A | ALA | 9   | H | -11.578516 | 14.052814 | -14.627822 | -4.739517 |
| 1JSF | A | ARG | 10  | H | -10.247536 | 12.466608 | -12.408917 | -4.211478 |
| 1JSF | A | THR | 11  | H | -8.711605  | 13.090424 | -9.850705  | -4.128067 |
| 1JSF | A | LEU | 12  | H | -8.075957  | 11.706857 | -10.280898 | -4.233595 |
| 1JSF | A | LYS | 13  | H | -7.769938  | 11.078618 | -10.711680 | -4.411633 |
| 1JSF | A | ARG | 14  | H | -7.582281  | 10.866221 | -10.872520 | -4.476195 |
| 1JSF | A | LEU | 15  | H | -7.522900  | 10.757498 | -11.082521 | -4.566039 |
| 1JSF | A | GLY | 16  | C | -7.584857  | 10.437288 | -11.367981 | -4.664103 |
| 1JSF | A | MET | 17  | T | -7.785365  | 10.215831 | -11.717410 | -4.816268 |
| 1JSF | A | ASP | 18  | T | -7.526151  | 9.390853  | -12.178391 | -5.206531 |
| 1JSF | A | GLY | 19  | T | -6.983584  | 9.497809  | -11.071552 | -5.050356 |
| 1JSF | A | TYR | 20  | G | -7.005783  | 9.485508  | -11.000933 | -5.037953 |
| 1JSF | A | ARG | 21  | G | -7.005915  | 9.482983  | -10.982201 | -5.022765 |
| 1JSF | A | GLY | 22  | G | -6.992201  | 9.513829  | -10.992012 | -5.001340 |
| 1JSF | A | ILE | 23  | C | -7.164522  | 9.734378  | -10.550686 | -4.872265 |
| 1JSF | A | SER | 24  | C | -8.917934  | 10.873113 | -12.017104 | -4.289317 |
| 1JSF | A | LEU | 25  | H | -9.005075  | 10.879789 | -11.779807 | -4.201761 |
| 1JSF | A | ALA | 26  | H | -9.218095  | 10.883516 | -11.483937 | -4.106316 |
| 1JSF | A | ASN | 27  | H | -11.892842 | 13.561875 | -14.175133 | -4.418420 |
| 1JSF | A | TRP | 28  | H | -13.075095 | 17.775502 | -14.955036 | -5.196209 |
| 1JSF | A | MET | 29  | H | -12.429008 | 16.170841 | -14.883322 | -5.454981 |
| 1JSF | A | CYS | 30  | H | -11.931073 | 15.321175 | -14.902812 | -5.423054 |
| 1JSF | A | LEU | 31  | H | -11.719275 | 15.764770 | -14.652923 | -5.427819 |
| 1JSF | A | ALA | 32  | H | -11.612899 | 15.511346 | -14.924421 | -5.490341 |
| 1JSF | A | LYS | 33  | H | -10.256057 | 12.452090 | -14.838223 | -6.098195 |
| 1JSF | A | TRP | 34  | H | -10.267220 | 12.388472 | -14.850114 | -6.114963 |
| 1JSF | A | GLU | 35  | H | -10.273876 | 12.335004 | -14.896358 | -6.143349 |
| 1JSF | A | SER | 36  | H | -10.265906 | 12.245464 | -14.975057 | -6.151552 |
| 1JSF | A | GLY | 37  | T | -10.257914 | 12.211011 | -14.983373 | -6.124940 |
| 1JSF | A | TYR | 38  | T | -11.511303 | 13.130378 | -16.166252 | -5.553743 |
| 1JSF | A | ASN | 39  | B | -8.018320  | 9.770417  | -10.706239 | -4.291749 |
| 1JSF | A | THR | 40  | T | -7.777038  | 9.224184  | -11.208542 | -4.327636 |
| 1JSF | A | ARG | 41  | T | -7.423359  | 9.350164  | -11.081385 | -4.400182 |
| 1JSF | A | ALA | 42  | T | -7.416613  | 9.343545  | -11.127052 | -4.410352 |
| 1JSF | A | THR | 43  | E | -7.307427  | 9.057544  | -11.501531 | -4.534239 |
| 1JSF | A | ASN | 44  | E | -7.122229  | 6.921858  | -12.773305 | -4.904241 |
| 1JSF | A | TYR | 45  | E | -7.046672  | 6.238815  | -13.271638 | -5.046804 |
| 1JSF | A | ASN | 46  | E | -6.815244  | 4.315588  | -13.831021 | -4.986387 |
| 1JSF | A | ALA | 47  | T | -6.614314  | 4.526464  | -13.558863 | -4.917866 |

|      |   |     |     |   |            |           |            |           |
|------|---|-----|-----|---|------------|-----------|------------|-----------|
| 1JSF | A | GLY | 48  | T | -6.642143  | 4.373155  | -13.583364 | -4.908559 |
| 1JSF | A | ASP | 49  | T | -6.787173  | 4.199275  | -13.539402 | -4.832864 |
| 1JSF | A | ARG | 50  | T | -6.876712  | 4.178317  | -13.331385 | -4.751076 |
| 1JSF | A | SER | 51  | E | -7.333561  | 5.133379  | -12.964711 | -4.767587 |
| 1JSF | A | THR | 52  | E | -9.603598  | 7.211366  | -15.548683 | -5.397899 |
| 1JSF | A | ASP | 53  | E | -12.723043 | 13.470340 | -18.186209 | -5.988736 |
| 1JSF | A | TYR | 54  | E | -12.808418 | 14.896840 | -17.270994 | -5.881373 |
| 1JSF | A | GLY | 55  | T | -12.560840 | 16.372604 | -15.976021 | -5.701034 |
| 1JSF | A | ILE | 56  | T | -12.703114 | 17.666887 | -15.148880 | -5.571263 |
| 1JSF | A | PHE | 57  | T | -12.916982 | 19.009316 | -14.370201 | -5.507766 |
| 1JSF | A | GLN | 58  | T | -13.052977 | 18.941344 | -14.234066 | -5.481688 |
| 1JSF | A | ILE | 59  | E | -13.101454 | 18.543266 | -14.274864 | -5.421982 |
| 1JSF | A | ASN | 60  | E | -14.699491 | 15.769313 | -19.063314 | -5.860184 |
| 1JSF | A | SER | 61  | T | -14.929106 | 13.425352 | -20.646658 | -5.896434 |
| 1JSF | A | ARG | 62  | T | -14.885552 | 13.391890 | -20.660570 | -5.885154 |
| 1JSF | A | TYR | 63  | T | -14.386884 | 14.167470 | -19.918783 | -6.127651 |
| 1JSF | A | TRP | 64  | T | -11.722063 | 11.034158 | -17.154115 | -6.078002 |
| 1JSF | A | CYS | 65  | C | -8.849816  | 5.090034  | -16.205538 | -5.770329 |
| 1JSF | A | ASN | 66  | B | -6.802894  | 6.417911  | -12.741880 | -5.642151 |
| 1JSF | A | ASP | 67  | T | -6.616633  | 6.436941  | -12.792380 | -5.548900 |
| 1JSF | A | GLY | 68  | T | -5.940634  | 5.687425  | -11.997657 | -5.211723 |
| 1JSF | A | LYS | 69  | T | -5.771571  | 6.014775  | -11.717508 | -5.090276 |
| 1JSF | A | THR | 70  | T | -5.201719  | 6.180720  | -10.042215 | -4.479921 |
| 1JSF | A | PRO | 71  | T | -5.220526  | 6.159170  | -9.920009  | -4.393852 |
| 1JSF | A | GLY | 72  | T | -5.223217  | 6.158997  | -9.880621  | -4.367907 |
| 1JSF | A | ALA | 73  | T | -5.356968  | 6.369479  | -9.440568  | -4.193652 |
| 1JSF | A | VAL | 74  | C | -5.425192  | 6.269681  | -9.297368  | -4.123726 |
| 1JSF | A | ASN | 75  | T | -6.791202  | 6.244782  | -11.871473 | -4.294223 |
| 1JSF | A | ALA | 76  | T | -7.137974  | 6.451720  | -12.294598 | -4.365499 |
| 1JSF | A | CYS | 77  | T | -7.518392  | 6.310379  | -13.138395 | -4.535728 |
| 1JSF | A | HIS | 78  | T | -7.531267  | 6.255752  | -13.135374 | -4.531347 |
| 1JSF | A | LEU | 79  | C | -8.010764  | 7.075097  | -13.619475 | -4.692908 |
| 1JSF | A | SER | 80  | B | -8.186297  | 6.860024  | -13.738727 | -4.650245 |
| 1JSF | A | CYS | 81  | G | -8.599821  | 6.737998  | -14.387499 | -4.758961 |
| 1JSF | A | SER | 82  | G | -9.342305  | 8.454269  | -14.186719 | -4.300878 |
| 1JSF | A | ALA | 83  | G | -9.518062  | 9.290667  | -13.845104 | -4.320575 |
| 1JSF | A | LEU | 84  | G | -9.657970  | 10.458971 | -13.750163 | -4.528749 |
| 1JSF | A | LEU | 85  | C | -8.374580  | 9.782786  | -11.998698 | -4.750223 |
| 1JSF | A | GLN | 86  | T | -7.889886  | 9.024768  | -11.981815 | -4.655376 |
| 1JSF | A | ASP | 87  | T | -7.140125  | 9.442667  | -10.778758 | -4.613601 |
| 1JSF | A | ASN | 88  | T | -6.997193  | 9.684938  | -10.614155 | -4.526556 |
| 1JSF | A | ILE | 89  | H | -6.987713  | 9.757521  | -10.587147 | -4.513215 |
| 1JSF | A | ALA | 90  | H | -7.031945  | 9.765130  | -10.487867 | -4.476368 |
| 1JSF | A | ASP | 91  | H | -7.113518  | 9.963486  | -10.273295 | -4.459686 |
| 1JSF | A | ALA | 92  | H | -7.789070  | 10.731029 | -10.245909 | -4.153911 |
| 1JSF | A | VAL | 93  | H | -8.778737  | 11.395229 | -11.355377 | -3.930642 |
| 1JSF | A | ALA | 94  | H | -9.086188  | 9.993645  | -12.332921 | -3.947239 |
| 1JSF | A | CYS | 95  | H | -9.609726  | 10.193946 | -13.133061 | -4.186674 |
| 1JSF | A | ALA | 96  | H | -9.946197  | 10.175666 | -13.092757 | -4.076974 |
| 1JSF | A | LYS | 97  | H | -10.920354 | 10.169345 | -14.703410 | -4.598651 |
| 1JSF | A | ARG | 98  | H | -12.714346 | 13.049437 | -16.346473 | -4.659931 |
| 1JSF | A | VAL | 99  | H | -10.740322 | 10.339343 | -14.046802 | -4.309322 |
| 1JSF | A | VAL | 100 | H | -10.436142 | 9.193673  | -15.022967 | -4.546777 |
| 1JSF | A | ARG | 101 | H | -9.589153  | 6.087368  | -16.243623 | -5.094036 |
| 1JSF | A | ASP | 102 | T | -8.300087  | 7.433188  | -13.338297 | -4.837073 |
| 1JSF | A | PRO | 103 | T | -8.090206  | 8.100962  | -12.970559 | -4.756179 |
| 1JSF | A | GLN | 104 | T | -8.065397  | 8.219809  | -12.960419 | -4.758482 |
| 1JSF | A | GLY | 105 | G | -8.069089  | 8.233937  | -12.934880 | -4.757523 |
| 1JSF | A | ILE | 106 | G | -8.104264  | 8.433761  | -12.706344 | -4.725838 |
| 1JSF | A | ARG | 107 | G | -8.703519  | 9.891558  | -12.256265 | -4.588506 |
| 1JSF | A | ALA | 108 | G | -9.788214  | 11.060736 | -13.043503 | -4.709049 |
| 1JSF | A | TRP | 109 | C | -11.508540 | 14.835038 | -14.099466 | -4.740256 |
| 1JSF | A | VAL | 110 | H | -11.155347 | 12.003057 | -15.106687 | -4.903126 |
| 1JSF | A | ALA | 111 | H | -11.254247 | 11.436862 | -15.395728 | -4.962406 |
| 1JSF | A | TRP | 112 | H | -11.343792 | 11.285984 | -15.390374 | -5.014957 |
| 1JSF | A | ARG | 113 | H | -11.367795 | 10.910945 | -15.606654 | -5.065981 |
| 1JSF | A | ASN | 114 | H | -9.969346  | 8.261187  | -16.120166 | -5.730613 |
| 1JSF | A | ARG | 115 | H | -9.293154  | 8.058659  | -14.994720 | -5.291071 |
| 1JSF | A | CYS | 116 | H | -8.187420  | 5.346572  | -14.900443 | -5.269591 |
| 1JSF | A | GLN | 117 | T | -8.006520  | 5.482173  | -14.779735 | -5.148697 |
| 1JSF | A | ASN | 118 | T | -7.273117  | 5.766398  | -12.496471 | -4.278583 |
| 1JSF | A | ARG | 119 | T | -7.212522  | 5.900997  | -12.438950 | -4.229208 |
| 1JSF | A | ASP | 120 | C | -7.215720  | 5.935468  | -12.399951 | -4.219105 |
| 1JSF | A | VAL | 121 | C | -7.321674  | 6.150369  | -11.913434 | -4.013986 |
| 1JSF | A | ARG | 122 | G | -7.372582  | 6.179628  | -11.687342 | -3.942802 |
| 1JSF | A | GLN | 123 | G | -8.456144  | 7.753765  | -12.349180 | -4.056606 |
| 1JSF | A | TYR | 124 | G | -9.512335  | 11.706244 | -13.501201 | -5.342740 |
| 1JSF | A | VAL | 125 | G | -5.764929  | 7.898945  | -10.884202 | -5.927986 |
| 1JSF | A | GLN | 126 | T | -5.014922  | 6.542350  | -10.503438 | -5.476490 |
| 1JSF | A | GLY | 127 | T | -3.193766  | 4.971188  | -7.060281  | -4.191962 |
| 1JSF | A | CYS | 128 | T | -3.193766  | 4.971188  | -7.060281  | -4.191962 |

|      |   |     |     |   |            |           |            |            |
|------|---|-----|-----|---|------------|-----------|------------|------------|
| 1JSF | A | GLY | 129 | C | -3.193766  | 4.971188  | -7.060281  | -4.191962  |
| 1JSF | A | VAL | 130 | C | -3.193766  | 4.971188  | -7.060281  | -4.191962  |
| 1JSG | A | CYS | 4   | C | -1.595062  | 0.255659  | -5.743578  | -2.957329  |
| 1JSG | A | PRO | 5   | C | -1.595062  | 0.255659  | -5.743578  | -2.957329  |
| 1JSG | A | THR | 6   | C | -1.595062  | 0.255659  | -5.743578  | -2.957329  |
| 1JSG | A | LEU | 7   | C | -1.595062  | 0.255659  | -5.743578  | -2.957329  |
| 1JSG | A | GLY | 8   | E | -1.702885  | 0.522831  | -5.682716  | -3.136396  |
| 1JSG | A | GLU | 9   | E | -3.050500  | 2.570676  | -8.735756  | -4.482838  |
| 1JSG | A | ALA | 10  | E | -3.236271  | 3.516360  | -8.508575  | -4.572651  |
| 1JSG | A | VAL | 11  | C | -3.937233  | 5.035874  | -7.881931  | -3.785244  |
| 1JSG | A | THR | 12  | C | -3.990097  | 5.072985  | -7.603041  | -3.627103  |
| 1JSG | A | ASP | 13  | C | -4.281009  | 5.334828  | -7.568445  | -3.635514  |
| 1JSG | A | HIS | 14  | C | -4.611331  | 5.931562  | -7.016752  | -3.498736  |
| 1JSG | A | PRO | 15  | C | -6.247843  | 8.481654  | -8.128819  | -3.657107  |
| 1JSG | A | ASP | 16  | C | -7.487565  | 7.538972  | -10.035369 | -3.838207  |
| 1JSG | A | ARG | 17  | E | -11.011567 | 11.563842 | -13.967014 | -4.504940  |
| 1JSG | A | LEU | 18  | E | -11.828448 | 15.375940 | -13.516088 | -4.498733  |
| 1JSG | A | TRP | 19  | E | -12.023234 | 16.234484 | -13.578073 | -4.696326  |
| 1JSG | A | ALA | 20  | E | -11.527846 | 21.219854 | -17.136541 | -10.037930 |
| 1JSG | A | TRP | 21  | E | -10.569274 | 20.334414 | -13.221291 | -7.772050  |
| 1JSG | A | GLU | 22  | E | -10.510228 | 20.029459 | -13.084699 | -7.484268  |
| 1JSG | A | LYS | 23  | T | -10.510375 | 20.025068 | -13.077745 | -7.479667  |
| 1JSG | A | PHE | 24  | T | -10.512879 | 20.025420 | -13.059798 | -7.477771  |
| 1JSG | A | VAL | 25  | E | -10.596283 | 19.597527 | -12.255702 | -6.801053  |
| 1JSG | A | TYR | 26  | E | -11.808330 | 17.395959 | -11.916566 | -4.707145  |
| 1JSG | A | LEU | 27  | E | -10.514533 | 9.427967  | -14.182260 | -4.775172  |
| 1JSG | A | ASP | 28  | E | -8.661968  | 6.693047  | -13.124141 | -4.725793  |
| 1JSG | A | GLU | 29  | T | -8.214706  | 6.840933  | -12.854830 | -4.616704  |
| 1JSG | A | LYS | 30  | T | -8.210257  | 6.878687  | -12.858056 | -4.616295  |
| 1JSG | A | GLN | 31  | T | -8.209027  | 6.897191  | -12.856899 | -4.616074  |
| 1JSG | A | HIS | 32  | E | -8.220949  | 6.850165  | -12.828895 | -4.612478  |
| 1JSG | A | ALA | 33  | E | -8.578481  | 7.104672  | -12.618733 | -4.517617  |
| 1JSG | A | TRP | 34  | E | -10.331576 | 15.317804 | -10.691886 | -4.079109  |
| 1JSG | A | LEU | 35  | E | -6.917974  | 13.843595 | -5.230118  | -3.230489  |
| 1JSG | A | PRO | 36  | E | -6.268231  | 13.038479 | -5.872894  | -3.595158  |
| 1JSG | A | LEU | 37  | E | -5.545337  | 11.460733 | -5.663375  | -3.496358  |
| 1JSG | A | THR | 38  | E | -5.515934  | 11.381381 | -5.796558  | -3.509771  |
| 1JSG | A | ILE | 39  | E | -5.304536  | 10.817612 | -6.292610  | -3.694190  |
| 1JSG | A | GLU | 40  | E | -4.736157  | 7.814663  | -6.902894  | -3.660158  |
| 1JSG | A | ILE | 41  | E | -3.729062  | 6.462933  | -5.701026  | -3.361252  |
| 1JSG | A | LYS | 42  | E | -3.738136  | 6.308923  | -5.766505  | -3.366976  |
| 1JSG | A | ASP | 43  | T | -3.739219  | 6.302499  | -5.762388  | -3.366280  |
| 1JSG | A | ARG | 44  | T | -3.752067  | 6.231866  | -5.724986  | -3.349430  |
| 1JSG | A | LEU | 45  | T | -3.829353  | 6.225883  | -5.517095  | -3.309999  |
| 1JSG | A | GLN | 46  | E | -6.099409  | 6.121103  | -9.131323  | -3.863491  |
| 1JSG | A | LEU | 47  | E | -8.140292  | 9.931222  | -9.726584  | -3.908393  |
| 1JSG | A | ARG | 48  | E | -11.282971 | 17.359848 | -15.216255 | -7.867961  |
| 1JSG | A | VAL | 49  | E | -13.229062 | 18.476979 | -17.062438 | -7.822391  |
| 1JSG | A | LEU | 50  | E | -14.925956 | 20.299195 | -16.715488 | -5.955169  |
| 1JSG | A | LEU | 51  | E | -11.760928 | 16.525486 | -15.086151 | -7.000268  |
| 1JSG | A | ARG | 52  | E | -9.527638  | 12.445777 | -13.586205 | -6.304362  |
| 1JSG | A | ARG | 53  | E | -5.744915  | 5.889750  | -8.351325  | -3.673103  |
| 1JSG | A | GLU | 54  | C | -3.743131  | 5.568462  | -5.866840  | -3.452465  |
| 1JSG | A | ASP | 55  | C | -1.749672  | 3.825538  | -3.732134  | -3.121662  |
| 1JSG | A | VAL | 56  | C | -0.985485  | 5.011450  | -2.450124  | -2.901484  |
| 1JSG | A | VAL | 57  | C | -0.770957  | 5.285214  | -2.624204  | -3.004305  |
| 1JSG | A | LEU | 58  | C | -0.769894  | 5.292763  | -2.630169  | -3.006188  |
| 1JSG | A | GLY | 59  | C | -0.774379  | 5.275148  | -2.602536  | -2.994418  |
| 1JSG | A | ARG | 60  | C | -0.959259  | 5.183591  | -1.972904  | -2.622433  |
| 1JSG | A | PRO | 61  | C | -1.677342  | 4.280486  | -2.293379  | -2.296760  |
| 1JSG | A | MET | 62  | C | -3.987593  | 7.163597  | -7.406068  | -4.085456  |
| 1JSG | A | THR | 63  | C | -4.156970  | 7.288455  | -8.174883  | -4.505880  |
| 1JSG | A | PRO | 64  | H | -4.387258  | 8.670607  | -8.785733  | -5.140843  |
| 1JSG | A | THR | 65  | H | -4.369825  | 8.351818  | -8.805308  | -5.065618  |
| 1JSG | A | GLN | 66  | H | -4.422084  | 8.237117  | -8.826603  | -5.060201  |
| 1JSG | A | ILE | 67  | H | -4.537368  | 8.540612  | -8.685734  | -4.991636  |
| 1JSG | A | GLY | 68  | C | -4.418299  | 8.450307  | -8.110453  | -4.707538  |
| 1JSG | A | PRO | 69  | C | -4.621741  | 8.344858  | -7.950378  | -4.512929  |
| 1JSG | A | SER | 70  | C | -4.899316  | 8.182299  | -6.750988  | -3.623000  |
| 1JSG | A | LEU | 71  | C | -4.921228  | 8.093315  | -6.547174  | -3.503650  |
| 1JSG | A | LEU | 72  | C | -5.092202  | 8.248774  | -6.143466  | -3.417728  |
| 1JSG | A | PRO | 73  | T | -6.653407  | 10.954497 | -6.756652  | -3.281918  |
| 1JSG | A | ILE | 74  | T | -7.863964  | 13.522323 | -7.054289  | -3.477871  |
| 1JSG | A | MET | 75  | E | -9.778562  | 16.159624 | -9.067772  | -4.195051  |
| 1JSG | A | TRP | 76  | E | -11.824214 | 17.414137 | -12.217233 | -4.700506  |
| 1JSG | A | GLN | 77  | E | -9.619016  | 9.033819  | -12.791024 | -4.413257  |
| 1JSG | A | LEU | 78  | E | -6.369868  | 6.718439  | -8.927482  | -3.866340  |
| 1JSG | A | TYR | 79  | T | -6.251507  | 6.808758  | -9.189308  | -3.928921  |
| 1JSG | A | PRO | 80  | T | -6.250887  | 6.811721  | -9.193448  | -3.929317  |
| 1JSG | A | ASP | 81  | T | -6.250923  | 6.811122  | -9.193261  | -3.929268  |
| 1JSG | A | GLY | 82  | T | -6.252900  | 6.804215  | -9.181213  | -3.927672  |



|      |   |     |     |   |            |           |            |           |
|------|---|-----|-----|---|------------|-----------|------------|-----------|
| 1JSG | A | ARG | 83  | C | -7.260547  | 7.231045  | -10.389016 | -4.212333 |
| 1JSG | A | TYR | 84  | E | -10.316211 | 9.649454  | -13.149840 | -4.308256 |
| 1JSG | A | ARG | 85  | E | -11.599157 | 5.876854  | -16.707512 | -4.229694 |
| 1JSG | A | SER | 86  | E | -9.903113  | 5.085395  | -15.518657 | -4.467720 |
| 1JSG | A | SER | 87  | T | -9.881026  | 5.207578  | -15.537733 | -4.469924 |
| 1JSG | A | ASP | 88  | T | -9.880827  | 5.210651  | -15.538095 | -4.470005 |
| 1JSG | A | SER | 89  | T | -9.880903  | 5.209813  | -15.537617 | -4.469934 |
| 1JSG | A | SER | 90  | C | -9.914305  | 5.172518  | -15.470313 | -4.484048 |
| 1JSG | A | PHE | 91  | E | -11.834484 | 8.498566  | -16.043764 | -4.530009 |
| 1JSG | A | TRP | 92  | E | -13.880902 | 17.717877 | -14.353609 | -4.528930 |
| 1JSG | A | ARG | 93  | E | -12.290182 | 15.227007 | -12.714822 | -4.250077 |
| 1JSG | A | LEU | 94  | E | -10.569473 | 15.662096 | -10.213901 | -4.105064 |
| 1JSG | A | VAL | 95  | E | -10.463110 | 15.614959 | -10.548499 | -4.188857 |
| 1JSG | A | TYR | 96  | E | -10.445946 | 15.617826 | -10.650729 | -4.212105 |
| 1JSG | A | HIS | 97  | E | -10.251999 | 14.420039 | -12.540322 | -5.054807 |
| 1JSG | A | ILE | 98  | E | -7.211554  | 7.324011  | -11.491894 | -4.793102 |
| 1JSG | A | LYS | 99  | E | -5.178738  | 5.266789  | -11.045185 | -5.619189 |
| 1JSG | A | ILE | 100 | E | -5.038347  | 5.626223  | -10.665003 | -5.372006 |
| 1JSG | A | ASP | 101 | T | -5.037817  | 5.627068  | -10.668500 | -5.371812 |
| 1JSG | A | GLY | 102 | T | -5.037831  | 5.626918  | -10.668312 | -5.371733 |
| 1JSG | A | VAL | 103 | E | -5.053057  | 5.583746  | -10.646922 | -5.386783 |
| 1JSG | A | GLU | 104 | E | -5.957841  | 6.968272  | -9.263034  | -4.448841 |
| 1JSG | A | ASP | 105 | E | -9.182567  | 6.685001  | -14.597017 | -5.156069 |
| 1JSG | A | MET | 106 | E | -11.449034 | 10.435043 | -15.603297 | -5.326530 |
| 1JSG | A | LEU | 107 | E | -13.787004 | 15.617789 | -16.876764 | -5.338302 |
| 1JSG | A | LEU | 108 | E | -13.537243 | 15.038359 | -17.243801 | -5.865276 |
| 1JSG | A | GLU | 109 | E | -11.337883 | 9.076889  | -16.398355 | -5.509246 |
| 1JSG | A | LEU | 110 | E | -7.390514  | 6.938068  | -10.115853 | -3.766565 |
| 1JSG | A | LEU | 111 | E | -4.854360  | 4.566958  | -7.289219  | -3.000683 |
| 1JSG | A | PRO | 112 | C | -4.854360  | 4.566958  | -7.289219  | -3.000683 |
| 1JSG | A | ASP | 113 | C | -4.854360  | 4.566958  | -7.289219  | -3.000683 |
| 1JSG | A | ASP | 114 | C | -4.854360  | 4.566958  | -7.289219  | -3.000683 |
| 1JWF | A | PRO | 7   | C | -7.013708  | 5.888834  | -11.285083 | -3.977380 |
| 1JWF | A | GLU | 8   | C | -7.013708  | 5.888834  | -11.285083 | -3.977380 |
| 1JWF | A | THR | 9   | C | -7.013708  | 5.888834  | -11.285083 | -3.977380 |
| 1JWF | A | LEU | 10  | H | -7.013708  | 5.888834  | -11.285083 | -3.977380 |
| 1JWF | A | GLU | 11  | H | -8.503370  | 7.637285  | -13.688654 | -5.044675 |
| 1JWF | A | ALA | 12  | H | -9.821657  | 8.186962  | -15.758201 | -5.718881 |
| 1JWF | A | ARG | 13  | H | -12.412833 | 11.277874 | -18.887709 | -6.323952 |
| 1JWF | A | ILE | 14  | H | -12.165439 | 11.959524 | -16.722205 | -5.266327 |
| 1JWF | A | ASN | 15  | H | -11.734137 | 10.358047 | -17.264564 | -5.313103 |
| 1JWF | A | ARG | 16  | H | -11.543243 | 10.533113 | -16.967084 | -5.246934 |
| 1JWF | A | ALA | 17  | H | -8.510661  | 8.892122  | -12.036628 | -4.448894 |
| 1JWF | A | THR | 18  | H | -7.944395  | 7.770549  | -12.800112 | -4.768719 |
| 1JWF | A | ASN | 19  | T | -5.484843  | 4.024182  | -10.524083 | -4.281021 |
| 1JWF | A | PRO | 20  | T | -4.695991  | 3.987915  | -9.800331  | -4.190971 |
| 1JWF | A | LEU | 21  | T | -4.368057  | 4.575252  | -9.435152  | -4.221874 |
| 1JWF | A | ASN | 22  | T | -4.361496  | 4.591849  | -9.461614  | -4.228416 |
| 1JWF | A | LYS | 23  | T | -4.308332  | 4.950533  | -9.395748  | -4.262058 |
| 1JWF | A | GLU | 24  | T | -4.389520  | 5.134830  | -9.235955  | -4.263433 |
| 1JWF | A | LEU | 25  | T | -4.731399  | 6.042870  | -8.997774  | -4.344361 |
| 1JWF | A | ASP | 26  | C | -5.639970  | 8.500071  | -9.227523  | -4.646712 |
| 1JWF | A | TRP | 27  | H | -5.704049  | 8.755180  | -8.929964  | -4.631233 |
| 1JWF | A | ALA | 28  | H | -7.177472  | 8.943540  | -10.963930 | -4.760727 |
| 1JWF | A | SER | 29  | H | -8.638046  | 10.134447 | -13.241529 | -5.119252 |
| 1JWF | A | ILE | 30  | H | -9.227690  | 10.777794 | -13.901770 | -5.207916 |
| 1JWF | A | ASN | 31  | H | -9.438793  | 10.480760 | -14.375083 | -5.345110 |
| 1JWF | A | GLY | 32  | H | -9.644104  | 10.114203 | -14.718039 | -5.477250 |
| 1JWF | A | PHE | 33  | H | -10.835333 | 11.364237 | -15.998283 | -5.687129 |
| 1JWF | A | CYS | 34  | H | -10.870821 | 11.044401 | -16.104293 | -5.692315 |
| 1JWF | A | GLU | 35  | H | -10.844161 | 9.901350  | -16.641242 | -5.650429 |
| 1JWF | A | GLN | 36  | H | -11.469521 | 9.311800  | -17.725520 | -5.592465 |
| 1JWF | A | LEU | 37  | H | -10.023806 | 7.914495  | -15.550128 | -5.104387 |
| 1JWF | A | ASN | 38  | H | -7.251736  | 4.240006  | -13.456440 | -4.902099 |
| 1JWF | A | GLU | 39  | H | -4.777517  | 4.790370  | -9.664827  | -4.642100 |
| 1JWF | A | ASP | 40  | C | -4.755616  | 4.907851  | -9.684951  | -4.636904 |
| 1JWF | A | PHE | 41  | C | -4.743055  | 4.979136  | -9.694710  | -4.628698 |
| 1JWF | A | GLU | 42  | H | -4.740096  | 5.005113  | -9.697519  | -4.627177 |
| 1JWF | A | GLY | 43  | H | -4.748392  | 5.019446  | -9.643738  | -4.622961 |
| 1JWF | A | PRO | 44  | H | -6.390151  | 8.322256  | -10.210701 | -4.394834 |
| 1JWF | A | PRO | 45  | H | -6.886612  | 8.741045  | -10.218030 | -4.250860 |
| 1JWF | A | LEU | 46  | H | -7.781323  | 10.323544 | -10.496658 | -4.276217 |
| 1JWF | A | ALA | 47  | H | -8.957945  | 11.595142 | -11.278190 | -3.881058 |
| 1JWF | A | THR | 48  | H | -9.342823  | 11.210671 | -11.545425 | -3.696442 |
| 1JWF | A | ARG | 49  | H | -9.339836  | 11.142665 | -11.547064 | -3.671638 |
| 1JWF | A | LEU | 50  | H | -10.104966 | 13.053627 | -12.225005 | -4.001753 |
| 1JWF | A | LEU | 51  | H | -10.434981 | 13.790656 | -12.388646 | -4.134161 |
| 1JWF | A | ALA | 52  | H | -10.547488 | 13.469756 | -12.548931 | -4.169336 |
| 1JWF | A | HIS | 53  | H | -10.583233 | 13.335896 | -12.561227 | -4.181655 |
| 1JWF | A | LYS | 54  | H | -11.481837 | 14.311627 | -14.446188 | -4.974925 |
| 1JWF | A | ILE | 55  | H | -11.789723 | 13.815397 | -15.068717 | -5.006535 |

|      |   |     |     |   |            |           |            |           |
|------|---|-----|-----|---|------------|-----------|------------|-----------|
| 1JWF | A | GLN | 56  | H | -12.176063 | 10.732330 | -18.504750 | -5.804607 |
| 1JWF | A | SER | 57  | T | -10.878586 | 10.497971 | -16.036149 | -5.645904 |
| 1JWF | A | PRO | 58  | T | -10.810866 | 10.629836 | -16.147404 | -5.696168 |
| 1JWF | A | GLN | 59  | T | -10.809431 | 10.637136 | -16.153498 | -5.697120 |
| 1JWF | A | GLU | 60  | H | -10.819510 | 10.650278 | -16.115913 | -5.701138 |
| 1JWF | A | TRP | 61  | H | -10.845577 | 10.723243 | -15.962399 | -5.679145 |
| 1JWF | A | GLU | 62  | H | -12.005784 | 12.065207 | -17.237236 | -6.037148 |
| 1JWF | A | ALA | 63  | H | -12.433156 | 15.227336 | -15.014171 | -4.989582 |
| 1JWF | A | ILE | 64  | H | -11.890831 | 15.667023 | -14.366371 | -5.139376 |
| 1JWF | A | GLN | 65  | H | -11.820316 | 15.709813 | -14.379877 | -5.131063 |
| 1JWF | A | ALA | 66  | H | -11.083530 | 17.125852 | -11.919156 | -4.638542 |
| 1JWF | A | LEU | 67  | H | -11.073773 | 17.178150 | -11.929021 | -4.646912 |
| 1JWF | A | THR | 68  | H | -11.037604 | 17.026570 | -12.139354 | -4.738975 |
| 1JWF | A | VAL | 69  | H | -11.060435 | 16.778223 | -12.281152 | -4.747995 |
| 1JWF | A | LEU | 70  | H | -11.077205 | 16.782744 | -12.240144 | -4.747849 |
| 1JWF | A | GLU | 71  | H | -11.418319 | 11.929014 | -16.726631 | -5.709708 |
| 1JWF | A | THR | 72  | H | -10.742855 | 9.275905  | -16.975988 | -5.668754 |
| 1JWF | A | CYS | 73  | H | -10.542327 | 8.467245  | -17.332256 | -5.714452 |
| 1JWF | A | MET | 74  | H | -9.760599  | 7.116516  | -16.712039 | -5.643364 |
| 1JWF | A | LYS | 75  | H | -8.647666  | 4.283203  | -16.014980 | -5.214377 |
| 1JWF | A | SER | 76  | H | -8.645346  | 4.267848  | -16.028480 | -5.210424 |
| 1JWF | A | CYS | 77  | H | -8.655467  | 4.204395  | -16.010834 | -5.201245 |
| 1JWF | A | GLY | 78  | H | -8.663732  | 4.154033  | -15.987815 | -5.193099 |
| 1JWF | A | LYS | 79  | H | -8.737476  | 3.811806  | -15.922886 | -5.137053 |
| 1JWF | A | ARG | 80  | H | -11.268379 | 6.460442  | -18.262658 | -5.124422 |
| 1JWF | A | PHE | 81  | H | -11.972314 | 9.988965  | -17.010078 | -5.102417 |
| 1JWF | A | HIS | 82  | H | -12.995612 | 11.968941 | -17.853365 | -5.324017 |
| 1JWF | A | ASP | 83  | H | -10.839457 | 9.266373  | -15.822933 | -5.205286 |
| 1JWF | A | GLU | 84  | H | -10.357260 | 11.380217 | -14.669779 | -5.268789 |
| 1JWF | A | VAL | 85  | H | -8.488593  | 10.441094 | -11.140557 | -4.312268 |
| 1JWF | A | GLY | 86  | H | -8.313000  | 11.199077 | -11.044776 | -4.417555 |
| 1JWF | A | LYS | 87  | C | -8.305046  | 11.270418 | -11.043711 | -4.418059 |
| 1JWF | A | PHE | 88  | H | -8.285838  | 11.543180 | -10.931682 | -4.409239 |
| 1JWF | A | ARG | 89  | H | -8.295639  | 11.519887 | -10.884675 | -4.393920 |
| 1JWF | A | PHE | 90  | H | -8.991874  | 14.028775 | -10.664257 | -4.672198 |
| 1JWF | A | LEU | 91  | H | -9.961502  | 16.671650 | -10.262551 | -4.466947 |
| 1JWF | A | ASN | 92  | H | -10.093873 | 16.697334 | -10.162733 | -4.497589 |
| 1JWF | A | GLU | 93  | H | -11.918115 | 16.568443 | -14.520666 | -5.465137 |
| 1JWF | A | LEU | 94  | H | -11.552756 | 18.105242 | -12.688931 | -5.106870 |
| 1JWF | A | ILE | 95  | H | -11.301518 | 17.843758 | -12.779146 | -5.122096 |
| 1JWF | A | LYS | 96  | H | -11.030212 | 16.765908 | -13.207521 | -5.178847 |
| 1JWF | A | VAL | 97  | H | -7.828393  | 11.519646 | -9.183752  | -3.995987 |
| 1JWF | A | VAL | 98  | H | -5.780484  | 11.035836 | -7.357599  | -4.367999 |
| 1JWF | A | SER | 99  | T | -5.398497  | 10.516322 | -7.818887  | -4.524223 |
| 1JWF | A | PRO | 100 | T | -4.936447  | 10.004472 | -7.844657  | -4.633135 |
| 1JWF | A | LYS | 101 | T | -4.904284  | 9.935523  | -7.957997  | -4.635072 |
| 1JWF | A | TYR | 102 | T | -4.908478  | 9.924267  | -7.949909  | -4.639724 |
| 1JWF | A | LEU | 103 | T | -5.056162  | 9.606319  | -8.145488  | -4.712820 |
| 1JWF | A | GLY | 104 | G | -5.238853  | 9.478280  | -8.089783  | -4.718543 |
| 1JWF | A | SER | 105 | G | -6.612968  | 8.635020  | -10.177586 | -4.664940 |
| 1JWF | A | ARG | 106 | G | -8.325065  | 7.588656  | -13.461659 | -4.622822 |
| 1JWF | A | THR | 107 | C | -8.283520  | 7.683803  | -13.519079 | -4.680378 |
| 1JWF | A | SER | 108 | C | -8.702257  | 7.403715  | -14.463342 | -4.955769 |
| 1JWF | A | GLU | 109 | H | -9.044718  | 9.213041  | -14.535881 | -5.248829 |
| 1JWF | A | LYS | 110 | H | -9.188694  | 9.900193  | -14.219353 | -5.329294 |
| 1JWF | A | VAL | 111 | H | -9.203202  | 9.962793  | -14.131760 | -5.323653 |
| 1JWF | A | LYS | 112 | H | -9.585201  | 10.420509 | -14.048647 | -5.368257 |
| 1JWF | A | ASN | 113 | H | -9.632411  | 10.418742 | -13.925104 | -5.344193 |
| 1JWF | A | LYS | 114 | H | -11.463829 | 14.250219 | -14.816468 | -5.227545 |
| 1JWF | A | ILE | 115 | H | -11.279807 | 15.744988 | -13.702639 | -5.046230 |
| 1JWF | A | LEU | 116 | H | -11.309313 | 15.815804 | -13.582814 | -5.014041 |
| 1JWF | A | GLU | 117 | H | -11.139034 | 15.703182 | -13.506155 | -4.940051 |
| 1JWF | A | LEU | 118 | H | -11.360248 | 17.072621 | -12.808819 | -4.829674 |
| 1JWF | A | LEU | 119 | H | -11.511289 | 17.382367 | -12.565423 | -4.765418 |
| 1JWF | A | TYR | 120 | H | -11.209351 | 14.946133 | -13.146648 | -4.616992 |
| 1JWF | A | SER | 121 | H | -9.096661  | 12.253472 | -11.288033 | -4.591324 |
| 1JWF | A | TRP | 122 | H | -8.674979  | 13.574210 | -10.674279 | -4.726712 |
| 1JWF | A | THR | 123 | H | -7.027687  | 8.197839  | -10.281477 | -4.148334 |
| 1JWF | A | VAL | 124 | H | -5.993040  | 6.360588  | -9.851310  | -3.958202 |
| 1JWF | A | GLY | 125 | H | -5.979549  | 6.384916  | -9.914049  | -3.973703 |
| 1JWF | A | LEU | 126 | T | -5.974708  | 6.374379  | -9.940490  | -3.974852 |
| 1JWF | A | PRO | 127 | T | -5.974429  | 6.338502  | -9.960535  | -3.974752 |
| 1JWF | A | GLU | 128 | T | -6.076608  | 6.056015  | -9.905687  | -3.949394 |
| 1JWF | A | GLU | 129 | T | -7.858271  | 7.672216  | -12.707667 | -4.554472 |
| 1JWF | A | VAL | 130 | H | -8.184547  | 8.289777  | -12.652885 | -4.414416 |
| 1JWF | A | LYS | 131 | H | -8.630320  | 9.053158  | -12.912062 | -4.555922 |
| 1JWF | A | ILE | 132 | H | -9.061916  | 10.145764 | -12.260150 | -4.328464 |
| 1JWF | A | ALA | 133 | H | -9.077820  | 10.105985 | -12.193923 | -4.309283 |
| 1JWF | A | GLU | 134 | H | -9.083342  | 10.092804 | -12.167185 | -4.305821 |
| 1JWF | A | ALA | 135 | H | -10.482337 | 13.598499 | -12.959811 | -4.893427 |
| 1JWF | A | TYR | 136 | H | -10.468633 | 20.495824 | -14.970473 | -9.231779 |

|      |   |     |     |   |            |           |            |           |
|------|---|-----|-----|---|------------|-----------|------------|-----------|
| 1JWF | A | GLN | 137 | H | -7.954258  | 14.886464 | -12.293598 | -7.282435 |
| 1JWF | A | MET | 138 | H | -7.157278  | 15.318353 | -11.189567 | -7.355065 |
| 1JWF | A | LEU | 139 | H | -6.556133  | 14.158043 | -10.445873 | -6.798814 |
| 1JWF | A | LYS | 140 | H | -5.600662  | 10.774637 | -9.586207  | -5.847061 |
| 1JWF | A | LYS | 141 | H | -4.881483  | 9.258372  | -8.347101  | -4.908578 |
| 1JWF | A | GLN | 142 | H | -4.545103  | 8.774210  | -7.781354  | -4.414330 |
| 1JWF | A | GLY | 143 | C | -4.545103  | 8.774210  | -7.781354  | -4.414330 |
| 1JWF | A | ILE | 144 | C | -4.545103  | 8.774210  | -7.781354  | -4.414330 |
| 1JWF | A | VAL | 145 | C | -4.545103  | 8.774210  | -7.781354  | -4.414330 |
| 1JWO | A | LEU | 117 | T | -5.960272  | 6.460114  | -8.548067  | -3.117896 |
| 1JWO | A | SER | 118 | T | -5.960272  | 6.460114  | -8.548067  | -3.117896 |
| 1JWO | A | LEU | 119 | T | -5.960272  | 6.460114  | -8.548067  | -3.117896 |
| 1JWO | A | MET | 120 | T | -5.960272  | 6.460114  | -8.548067  | -3.117896 |
| 1JWO | A | PRO | 121 | T | -7.257339  | 7.442176  | -10.185225 | -3.676901 |
| 1JWO | A | TRP | 122 | T | -10.183134 | 14.311469 | -12.224556 | -4.884986 |
| 1JWO | A | PHE | 123 | B | -9.189122  | 13.474053 | -11.395595 | -5.099887 |
| 1JWO | A | HIS | 124 | T | -8.165723  | 10.028605 | -12.224439 | -5.152580 |
| 1JWO | A | GLY | 125 | T | -7.142607  | 7.631168  | -12.212688 | -5.129793 |
| 1JWO | A | LYS | 126 | T | -7.091208  | 7.577484  | -12.340777 | -5.117061 |
| 1JWO | A | ILE | 127 | T | -6.950607  | 7.405570  | -12.454629 | -5.072751 |
| 1JWO | A | SER | 128 | C | -6.825226  | 7.190694  | -12.513149 | -5.033779 |
| 1JWO | A | GLY | 129 | H | -6.812747  | 7.078968  | -12.548657 | -5.015875 |
| 1JWO | A | GLN | 130 | H | -7.140813  | 7.118593  | -12.860483 | -4.898430 |
| 1JWO | A | GLU | 131 | H | -7.186598  | 7.168928  | -12.788716 | -4.890522 |
| 1JWO | A | ALA | 132 | H | -7.408249  | 7.370434  | -12.749236 | -4.881733 |
| 1JWO | A | VAL | 133 | H | -7.888948  | 7.998540  | -12.896490 | -4.874715 |
| 1JWO | A | GLN | 134 | H | -8.472504  | 8.420812  | -13.178392 | -4.712341 |
| 1JWO | A | GLN | 135 | H | -9.139812  | 10.067466 | -13.696909 | -4.809598 |
| 1JWO | A | LEU | 136 | H | -9.199172  | 9.622786  | -13.832675 | -4.650689 |
| 1JWO | A | GLN | 137 | T | -8.591420  | 6.721019  | -14.284855 | -4.635251 |
| 1JWO | A | PRO | 138 | T | -7.166031  | 6.042653  | -12.234795 | -4.580579 |
| 1JWO | A | PRO | 139 | T | -7.160079  | 6.072421  | -12.251601 | -4.586869 |
| 1JWO | A | GLU | 140 | T | -7.165146  | 6.037107  | -12.242359 | -4.586508 |
| 1JWO | A | ASP | 141 | T | -7.172958  | 6.012467  | -12.217490 | -4.587523 |
| 1JWO | A | GLY | 142 | T | -7.210238  | 6.055104  | -12.069413 | -4.584804 |
| 1JWO | A | LEU | 143 | E | -9.601677  | 9.838537  | -13.920372 | -5.084803 |
| 1JWO | A | PHE | 144 | E | -11.361041 | 16.119078 | -13.349863 | -4.958753 |
| 1JWO | A | LEU | 145 | E | -11.680489 | 17.886299 | -12.179369 | -4.670815 |
| 1JWO | A | VAL | 146 | E | -11.951300 | 17.966189 | -12.048686 | -4.551459 |
| 1JWO | A | ARG | 147 | E | -10.554205 | 10.376534 | -14.111693 | -4.622546 |
| 1JWO | A | GLU | 148 | E | -6.822620  | 7.179410  | -10.829320 | -4.522316 |
| 1JWO | A | SER | 149 | T | -5.198457  | 4.114255  | -9.616785  | -3.817893 |
| 1JWO | A | ALA | 150 | T | -3.706314  | 2.192185  | -8.598774  | -3.690705 |
| 1JWO | A | ARG | 151 | T | -3.695092  | 2.212318  | -8.654164  | -3.701108 |
| 1JWO | A | HIS | 152 | T | -3.695068  | 2.212576  | -8.654396  | -3.701179 |
| 1JWO | A | PRO | 153 | T | -3.698092  | 2.187229  | -8.643175  | -3.696912 |
| 1JWO | A | GLY | 154 | T | -3.744037  | 2.048307  | -8.568944  | -3.690010 |
| 1JWO | A | ASP | 155 | T | -6.050852  | 3.280127  | -11.527265 | -4.234483 |
| 1JWO | A | TYR | 156 | E | -9.382394  | 9.724503  | -14.111373 | -5.193348 |
| 1JWO | A | VAL | 157 | E | -10.132944 | 11.548520 | -13.359092 | -4.898666 |
| 1JWO | A | LEU | 158 | E | -12.456305 | 17.085279 | -14.640272 | -5.117724 |
| 1JWO | A | CYS | 159 | E | -11.814602 | 12.665160 | -15.843577 | -5.217219 |
| 1JWO | A | VAL | 160 | E | -10.415583 | 11.204338 | -13.566897 | -4.476425 |
| 1JWO | A | SER | 161 | E | -7.674962  | 7.737690  | -11.652299 | -4.510961 |
| 1JWO | A | PHE | 162 | E | -5.386563  | 8.945221  | -7.569437  | -4.098155 |
| 1JWO | A | GLY | 163 | T | -4.689772  | 8.213280  | -6.979879  | -3.712696 |
| 1JWO | A | ARG | 164 | T | -4.683617  | 8.238316  | -6.996004  | -3.711483 |
| 1JWO | A | ASP | 165 | E | -4.683618  | 8.238414  | -6.995948  | -3.711488 |
| 1JWO | A | VAL | 166 | E | -4.687396  | 8.241822  | -6.966258  | -3.706356 |
| 1JWO | A | ILE | 167 | E | -4.899528  | 7.926099  | -6.742850  | -3.540722 |
| 1JWO | A | HIS | 168 | E | -7.389318  | 10.644298 | -8.561539  | -3.598782 |
| 1JWO | A | TYR | 169 | E | -10.452475 | 13.133065 | -12.607233 | -4.542889 |
| 1JWO | A | ARG | 170 | E | -12.051122 | 16.093169 | -13.817104 | -4.949644 |
| 1JWO | A | VAL | 171 | E | -10.143201 | 9.189019  | -13.708843 | -4.234515 |
| 1JWO | A | LEU | 172 | E | -7.041306  | 6.389426  | -11.461757 | -4.460703 |
| 1JWO | A | HIS | 173 | E | -6.717413  | 6.588673  | -11.555547 | -4.543237 |
| 1JWO | A | ARG | 174 | T | -6.697645  | 6.707646  | -11.564870 | -4.546915 |
| 1JWO | A | ASP | 175 | T | -6.694997  | 6.730672  | -11.571274 | -4.549112 |
| 1JWO | A | GLY | 176 | E | -6.696646  | 6.724826  | -11.565402 | -4.550108 |
| 1JWO | A | HIS | 177 | E | -7.177031  | 7.171275  | -11.711510 | -4.660793 |
| 1JWO | A | LEU | 178 | E | -7.724840  | 11.654133 | -10.130229 | -4.539445 |
| 1JWO | A | THR | 179 | T | -5.372263  | 9.698913  | -7.388896  | -4.291800 |
| 1JWO | A | ILE | 180 | T | -4.890359  | 8.388677  | -7.580732  | -4.003739 |
| 1JWO | A | ASP | 181 | T | -4.665766  | 8.681768  | -7.490756  | -4.044584 |
| 1JWO | A | GLU | 182 | T | -4.661953  | 8.710125  | -7.495786  | -4.045226 |
| 1JWO | A | ALA | 183 | T | -4.657839  | 8.753970  | -7.484975  | -4.043598 |
| 1JWO | A | VAL | 184 | T | -4.863205  | 8.389471  | -7.543833  | -3.942679 |
| 1JWO | A | PHE | 185 | C | -5.312243  | 9.583532  | -7.328257  | -4.134518 |
| 1JWO | A | PHE | 186 | B | -6.951934  | 13.771138 | -7.958299  | -4.210002 |
| 1JWO | A | CYS | 187 | T | -6.243413  | 10.855707 | -8.851694  | -4.685288 |
| 1JWO | A | ASN | 188 | T | -6.349619  | 10.270099 | -9.147974  | -4.806490 |

|      |   |     |     |   |            |           |            |           |
|------|---|-----|-----|---|------------|-----------|------------|-----------|
| 1JWO | A | LEU | 189 | H | -6.371437  | 10.113900 | -9.145064  | -4.808716 |
| 1JWO | A | MET | 190 | H | -6.375670  | 10.061527 | -9.144331  | -4.807032 |
| 1JWO | A | ASP | 191 | H | -6.382146  | 10.008704 | -9.131915  | -4.804639 |
| 1JWO | A | MET | 192 | H | -10.349174 | 14.600645 | -13.452346 | -5.653955 |
| 1JWO | A | VAL | 193 | H | -11.303011 | 14.483717 | -14.858393 | -5.532765 |
| 1JWO | A | GLU | 194 | H | -11.448284 | 13.456033 | -15.511276 | -5.578896 |
| 1JWO | A | HIS | 195 | H | -11.932414 | 13.543054 | -16.061962 | -5.473723 |
| 1JWO | A | TYR | 196 | H | -12.316299 | 13.011062 | -16.933488 | -5.440726 |
| 1JWO | A | SER | 197 | H | -8.323090  | 6.393950  | -13.901069 | -5.083270 |
| 1JWO | A | LYS | 198 | H | -6.039650  | 6.639135  | -10.433110 | -4.723773 |
| 1JWO | A | ASP | 199 | C | -5.764735  | 7.804430  | -9.850219  | -4.654267 |
| 1JWO | A | LYS | 200 | T | -5.718453  | 7.918903  | -9.893759  | -4.654817 |
| 1JWO | A | GLY | 201 | T | -5.696763  | 8.024724  | -9.917288  | -4.666291 |
| 1JWO | A | ALA | 202 | T | -5.698881  | 8.088927  | -9.873446  | -4.663896 |
| 1JWO | A | ILE | 203 | T | -6.171873  | 9.869415  | -9.282143  | -4.600658 |
| 1JWO | A | CYS | 204 | T | -6.952152  | 10.178584 | -10.487892 | -4.782895 |
| 1JWO | A | THR | 205 | C | -7.497701  | 11.472551 | -10.585674 | -4.967253 |
| 1JWO | A | LYS | 206 | C | -8.321808  | 13.316409 | -10.701183 | -4.948672 |
| 1JWO | A | LEU | 207 | C | -9.025445  | 13.153637 | -11.543061 | -4.894162 |
| 1JWO | A | VAL | 208 | C | -8.913480  | 11.334454 | -12.320691 | -4.820169 |
| 1JWO | A | ARG | 209 | C | -8.907984  | 9.047094  | -13.029077 | -4.444377 |
| 1JWO | A | PRO | 210 | B | -6.155903  | 7.051124  | -8.674185  | -3.429954 |
| 1JWO | A | LYS | 211 | C | -6.155903  | 7.051124  | -8.674185  | -3.429954 |
| 1JWO | A | ARG | 212 | C | -6.155903  | 7.051124  | -8.674185  | -3.429954 |
| 1JWO | A | LYS | 213 | C | -6.155903  | 7.051124  | -8.674185  | -3.429954 |
| 1K04 | A | GLU | 908 | C | 1.117405   | -0.008610 | -2.909204  | -2.818333 |
| 1K04 | A | ILE | 909 | C | 1.117405   | -0.008610 | -2.909204  | -2.818333 |
| 1K04 | A | SER | 910 | C | 1.117405   | -0.008610 | -2.909204  | -2.818333 |
| 1K04 | A | PRO | 911 | C | 1.117405   | -0.008610 | -2.909204  | -2.818333 |
| 1K04 | A | PRO | 912 | C | 0.573721   | 0.105139  | -2.173436  | -2.121579 |
| 1K04 | A | PRO | 913 | C | -0.591441  | 1.191831  | -3.875668  | -2.606932 |
| 1K04 | A | THR | 914 | T | -0.969333  | 1.513570  | -4.980521  | -3.438146 |
| 1K04 | A | ALA | 915 | T | -1.080410  | 1.470455  | -5.111070  | -3.620384 |
| 1K04 | A | ASN | 916 | T | -1.149094  | 1.427104  | -4.989065  | -3.636105 |
| 1K04 | A | LEU | 917 | T | -1.966321  | 1.696530  | -6.339480  | -4.135584 |
| 1K04 | A | ASP | 918 | C | -2.805413  | 2.115001  | -8.162918  | -4.961472 |
| 1K04 | A | ARG | 919 | T | -4.041100  | 3.890373  | -11.344607 | -6.498651 |
| 1K04 | A | SER | 920 | T | -4.342362  | 4.010143  | -12.324173 | -7.118340 |
| 1K04 | A | ASN | 921 | T | -4.506204  | 4.042478  | -12.411658 | -7.296253 |
| 1K04 | A | ASP | 922 | T | -5.217343  | 4.579715  | -13.845929 | -8.082589 |
| 1K04 | A | LYS | 923 | H | -6.434261  | 5.162908  | -16.675924 | -9.034397 |
| 1K04 | A | VAL | 924 | H | -6.995163  | 5.180784  | -17.403273 | -9.129799 |
| 1K04 | A | TYR | 925 | H | -8.138681  | 6.612353  | -18.747563 | -9.172065 |
| 1K04 | A | GLU | 926 | H | -8.572587  | 7.019012  | -16.397059 | -6.542661 |
| 1K04 | A | ASN | 927 | H | -7.942301  | 5.745927  | -13.699802 | -4.639764 |
| 1K04 | A | VAL | 928 | H | -6.718128  | 5.085850  | -10.105873 | -3.450148 |
| 1K04 | A | THR | 929 | H | -6.560846  | 5.101384  | -10.022946 | -3.286798 |
| 1K04 | A | GLY | 930 | H | -6.515408  | 5.072526  | -9.845897  | -3.089297 |
| 1K04 | A | LEU | 931 | H | -6.458664  | 5.075554  | -9.686021  | -2.920203 |
| 1K04 | A | VAL | 932 | H | -6.313118  | 4.968544  | -9.716765  | -2.908592 |
| 1K04 | A | LYS | 933 | H | -6.559252  | 4.992690  | -10.090278 | -2.817906 |
| 1K04 | A | ALA | 934 | H | -6.686380  | 4.989154  | -10.286058 | -2.874711 |
| 1K04 | A | VAL | 935 | H | -6.741222  | 5.004537  | -10.503096 | -3.037139 |
| 1K04 | A | ILE | 936 | H | -6.834591  | 4.997095  | -10.937026 | -3.364228 |
| 1K04 | A | GLU | 937 | H | -7.389141  | 5.580615  | -12.263805 | -4.029659 |
| 1K04 | A | MET | 938 | H | -7.557109  | 4.677352  | -12.497427 | -3.670159 |
| 1K04 | A | SER | 939 | H | -7.388897  | 4.473726  | -11.725182 | -3.271862 |
| 1K04 | A | SER | 940 | H | -6.784532  | 3.906291  | -9.514550  | -2.190914 |
| 1K04 | A | LYS | 941 | H | -5.951236  | 4.962415  | -7.228460  | -1.823419 |
| 1K04 | A | ILE | 942 | H | -5.523929  | 5.098054  | -7.675875  | -2.370517 |
| 1K04 | A | GLN | 943 | C | -5.516656  | 5.166707  | -7.652986  | -2.372300 |
| 1K04 | A | PRO | 944 | C | -5.489631  | 5.275717  | -7.620903  | -2.364498 |
| 1K04 | A | ALA | 945 | C | -5.523921  | 5.450638  | -7.551124  | -2.407398 |
| 1K04 | A | PRO | 946 | C | -5.795893  | 5.536642  | -8.154673  | -2.810571 |
| 1K04 | A | PRO | 947 | G | -6.800528  | 6.901884  | -8.269854  | -2.425263 |
| 1K04 | A | GLU | 948 | G | -6.980856  | 7.070557  | -7.844901  | -2.211783 |
| 1K04 | A | GLU | 949 | G | -7.839062  | 7.917566  | -7.466787  | -1.753201 |
| 1K04 | A | TYR | 950 | H | -9.769258  | 12.499733 | -10.192453 | -3.234684 |
| 1K04 | A | VAL | 951 | H | -9.398655  | 9.982855  | -9.543929  | -2.282217 |
| 1K04 | A | PRO | 952 | H | -8.828977  | 9.574385  | -10.239986 | -2.968679 |
| 1K04 | A | MET | 953 | H | -8.584679  | 9.377577  | -10.269698 | -3.090012 |
| 1K04 | A | VAL | 954 | H | -8.441456  | 9.285685  | -10.281495 | -3.053350 |
| 1K04 | A | LYS | 955 | H | -8.400518  | 9.119325  | -10.342140 | -2.993998 |
| 1K04 | A | GLU | 956 | H | -8.429659  | 8.771050  | -10.671896 | -3.091652 |
| 1K04 | A | VAL | 957 | H | -8.620538  | 8.562908  | -10.760515 | -2.988346 |
| 1K04 | A | GLY | 958 | H | -8.866524  | 7.994272  | -11.070634 | -2.727019 |
| 1K04 | A | LEU | 959 | H | -9.175131  | 7.196695  | -11.654255 | -2.531277 |
| 1K04 | A | ALA | 960 | H | -9.322166  | 7.434700  | -11.750121 | -2.613745 |
| 1K04 | A | LEU | 961 | H | -9.686213  | 8.874562  | -12.061624 | -3.108197 |
| 1K04 | A | ARG | 962 | H | -9.912857  | 8.394236  | -12.015807 | -2.810393 |
| 1K04 | A | THR | 963 | H | -9.783807  | 9.021507  | -11.778698 | -3.044699 |

|      |   |     |      |   |            |           |            |           |
|------|---|-----|------|---|------------|-----------|------------|-----------|
| 1K04 | A | LEU | 964  | H | -9.891729  | 9.332766  | -11.772270 | -3.200392 |
| 1K04 | A | LEU | 965  | H | -9.931652  | 9.228654  | -11.946175 | -3.334098 |
| 1K04 | A | ALA | 966  | H | -9.142554  | 7.408570  | -10.586923 | -2.299001 |
| 1K04 | A | THR | 967  | H | -8.425432  | 8.739186  | -10.776504 | -3.485938 |
| 1K04 | A | VAL | 968  | H | -8.340985  | 9.328058  | -10.537078 | -3.566573 |
| 1K04 | A | ASP | 969  | H | -8.258937  | 9.334245  | -10.577761 | -3.542621 |
| 1K04 | A | GLU | 970  | H | -7.977647  | 9.324227  | -9.563732  | -2.976366 |
| 1K04 | A | THR | 971  | H | -8.002817  | 9.760589  | -9.410958  | -3.032548 |
| 1K04 | A | ILE | 972  | G | -8.230016  | 10.114678 | -8.699951  | -2.564187 |
| 1K04 | A | PRO | 973  | G | -8.001963  | 9.630234  | -8.855489  | -2.694937 |
| 1K04 | A | LEU | 974  | G | -8.027298  | 9.637956  | -8.776625  | -2.650119 |
| 1K04 | A | LEU | 975  | C | -8.063406  | 10.291280 | -8.594457  | -2.751809 |
| 1K04 | A | PRO | 976  | C | -7.972367  | 9.996974  | -8.665283  | -2.705958 |
| 1K04 | A | ALA | 977  | G | -7.914504  | 9.714647  | -8.991616  | -2.800622 |
| 1K04 | A | SER | 978  | G | -8.137078  | 9.830974  | -9.029145  | -2.678441 |
| 1K04 | A | THR | 979  | G | -8.152452  | 9.957601  | -8.935811  | -2.677331 |
| 1K04 | A | HIS | 980  | H | -8.481183  | 9.214403  | -10.206188 | -3.022380 |
| 1K04 | A | ARG | 981  | H | -8.685323  | 9.517846  | -10.717420 | -3.243200 |
| 1K04 | A | GLU | 982  | H | -8.932578  | 10.790767 | -10.111824 | -3.088205 |
| 1K04 | A | ILE | 983  | H | -9.147959  | 11.465867 | -9.362565  | -2.702516 |
| 1K04 | A | GLU | 984  | H | -9.248756  | 11.106152 | -9.329553  | -2.595722 |
| 1K04 | A | MET | 985  | H | -9.274385  | 10.943060 | -9.401936  | -2.613186 |
| 1K04 | A | ALA | 986  | H | -10.024997 | 11.855984 | -11.682675 | -3.962983 |
| 1K04 | A | GLN | 987  | H | -11.117721 | 9.146174  | -13.847111 | -3.231950 |
| 1K04 | A | LYS | 988  | H | -9.793262  | 8.420234  | -11.978659 | -3.398340 |
| 1K04 | A | LEU | 989  | H | -9.800567  | 8.432670  | -11.924432 | -3.384530 |
| 1K04 | A | LEU | 990  | H | -9.835425  | 8.456841  | -11.866226 | -3.433812 |
| 1K04 | A | ASN | 991  | H | -9.812227  | 8.491997  | -11.896638 | -3.412609 |
| 1K04 | A | SER | 992  | H | -9.788993  | 8.550115  | -12.000407 | -3.454014 |
| 1K04 | A | ASP | 993  | H | -11.038996 | 10.491233 | -13.860318 | -3.784733 |
| 1K04 | A | LEU | 994  | H | -10.641466 | 11.761237 | -12.412483 | -3.615238 |
| 1K04 | A | GLY | 995  | H | -9.295425  | 10.469741 | -9.373704  | -2.685092 |
| 1K04 | A | GLU | 996  | H | -9.283847  | 10.605513 | -9.348265  | -2.695475 |
| 1K04 | A | LEU | 997  | H | -9.295363  | 10.624890 | -9.238864  | -2.660550 |
| 1K04 | A | ILE | 998  | H | -9.290826  | 10.617304 | -9.291354  | -2.683209 |
| 1K04 | A | ASN | 999  | H | -9.322569  | 10.490963 | -9.198493  | -2.644889 |
| 1K04 | A | LYS | 1000 | H | -10.986089 | 13.089325 | -11.870297 | -3.684173 |
| 1K04 | A | MET | 1001 | H | -11.666285 | 11.957900 | -15.091559 | -5.074665 |
| 1K04 | A | LYS | 1002 | H | -11.602345 | 11.467153 | -14.905745 | -4.754397 |
| 1K04 | A | LEU | 1003 | H | -12.096854 | 12.419916 | -14.524854 | -4.159852 |
| 1K04 | A | ALA | 1004 | H | -12.043263 | 12.804241 | -14.159491 | -4.050216 |
| 1K04 | A | GLN | 1005 | H | -10.826658 | 11.283701 | -11.738988 | -3.268326 |
| 1K04 | A | GLN | 1006 | H | -8.576557  | 9.198034  | -8.689524  | -2.474744 |
| 1K04 | A | TYR | 1007 | H | -7.854098  | 8.814825  | -9.692509  | -3.338403 |
| 1K04 | A | VAL | 1008 | T | -4.834523  | 6.312271  | -6.107830  | -3.091146 |
| 1K04 | A | MET | 1009 | T | -4.831272  | 6.321920  | -6.125010  | -3.091129 |
| 1K04 | A | THR | 1010 | T | -4.831225  | 6.321976  | -6.125415  | -3.091073 |
| 1K04 | A | SER | 1011 | C | -4.832263  | 6.317004  | -6.121071  | -3.092188 |
| 1K04 | A | LEU | 1012 | H | -4.834816  | 6.306895  | -6.103817  | -3.089555 |
| 1K04 | A | GLN | 1013 | H | -7.904015  | 8.078783  | -9.293463  | -3.077360 |
| 1K04 | A | GLN | 1014 | H | -10.157587 | 8.396166  | -11.523473 | -2.703948 |
| 1K04 | A | GLU | 1015 | H | -11.639678 | 10.013110 | -14.406177 | -3.697018 |
| 1K04 | A | TYR | 1016 | H | -12.351707 | 13.138964 | -15.364614 | -4.966441 |
| 1K04 | A | LYS | 1017 | H | -12.314771 | 12.537650 | -15.685696 | -4.979298 |
| 1K04 | A | LYS | 1018 | H | -10.659587 | 9.349709  | -14.330124 | -4.750434 |
| 1K04 | A | GLN | 1019 | H | -10.636597 | 9.293211  | -14.307009 | -4.671918 |
| 1K04 | A | MET | 1020 | H | -10.410089 | 9.663496  | -13.031328 | -3.787018 |
| 1K04 | A | LEU | 1021 | H | -8.942177  | 7.818175  | -8.785365  | -1.476100 |
| 1K04 | A | THR | 1022 | H | -8.493521  | 7.799725  | -9.686030  | -2.189800 |
| 1K04 | A | ALA | 1023 | H | -8.489202  | 7.862394  | -9.613400  | -2.152627 |
| 1K04 | A | ALA | 1024 | H | -8.456317  | 7.961579  | -9.646741  | -2.162768 |
| 1K04 | A | HIS | 1025 | H | -8.404111  | 7.941858  | -9.605203  | -2.092846 |
| 1K04 | A | ALA | 1026 | H | -8.674933  | 8.123878  | -10.318595 | -2.576064 |
| 1K04 | A | LEU | 1027 | H | -9.397525  | 9.106462  | -9.941571  | -1.964365 |
| 1K04 | A | ALA | 1028 | H | -8.735844  | 7.356804  | -10.931667 | -2.883368 |
| 1K04 | A | VAL | 1029 | H | -8.721934  | 7.190549  | -11.116497 | -2.950369 |
| 1K04 | A | ASP | 1030 | H | -8.823449  | 7.053572  | -11.471223 | -3.246512 |
| 1K04 | A | ALA | 1031 | H | -8.811707  | 7.108773  | -11.449842 | -3.221032 |
| 1K04 | A | LYS | 1032 | H | -8.758721  | 7.247721  | -11.581047 | -3.296548 |
| 1K04 | A | ASN | 1033 | H | -9.499275  | 8.857494  | -12.153146 | -3.307044 |
| 1K04 | A | LEU | 1034 | H | -9.799522  | 9.736069  | -12.136890 | -3.443481 |
| 1K04 | A | LEU | 1035 | H | -9.808493  | 9.687125  | -12.170767 | -3.461033 |
| 1K04 | A | ASP | 1036 | H | -9.884968  | 9.646708  | -12.412763 | -3.674642 |
| 1K04 | A | VAL | 1037 | H | -10.536630 | 11.109113 | -12.192352 | -3.522106 |
| 1K04 | A | ILE | 1038 | H | -10.679240 | 13.215237 | -15.261615 | -6.298681 |
| 1K04 | A | ASP | 1039 | H | -10.143434 | 11.719761 | -16.295289 | -7.095201 |
| 1K04 | A | GLN | 1040 | H | -9.470671  | 10.872859 | -14.586090 | -6.288277 |
| 1K04 | A | ALA | 1041 | H | -8.748314  | 10.181161 | -12.580257 | -5.412218 |
| 1K04 | A | ARG | 1042 | H | -6.814104  | 7.676566  | -12.443562 | -6.253724 |
| 1K04 | A | LEU | 1043 | H | -4.660039  | 4.634150  | -9.709854  | -5.317848 |
| 1K04 | A | LYS | 1044 | H | -4.127065  | 4.485732  | -8.639565  | -4.549623 |

|      |   |     |      |   |            |           |            |           |
|------|---|-----|------|---|------------|-----------|------------|-----------|
| 1K04 | A | MET | 1045 | H | -3.551675  | 3.361609  | -6.416827  | -2.911870 |
| 1K04 | A | LEU | 1046 | H | -2.314446  | 1.597213  | -2.845603  | -1.018007 |
| 1K04 | A | GLY | 1047 | T | -2.314446  | 1.597213  | -2.845603  | -1.018007 |
| 1K04 | A | GLN | 1048 | T | -2.314446  | 1.597213  | -2.845603  | -1.018007 |
| 1K04 | A | THR | 1049 | C | -2.314446  | 1.597213  | -2.845603  | -1.018007 |
| 1K1B | A | GLU | 125  | T | -1.353229  | 1.354325  | -6.859083  | -4.046474 |
| 1K1B | A | ASP | 126  | T | -1.353229  | 1.354325  | -6.859083  | -4.046474 |
| 1K1B | A | GLY | 127  | T | -1.353229  | 1.354325  | -6.859083  | -4.046474 |
| 1K1B | A | ASP | 128  | T | -1.353229  | 1.354325  | -6.859083  | -4.046474 |
| 1K1B | A | THR | 129  | T | -1.920899  | 3.162466  | -6.793917  | -4.520546 |
| 1K1B | A | PRO | 130  | C | -3.013409  | 4.205220  | -7.878463  | -4.942405 |
| 1K1B | A | LEU | 131  | H | -4.902167  | 8.945468  | -8.724039  | -5.744824 |
| 1K1B | A | HIS | 132  | H | -7.450678  | 12.055584 | -12.322758 | -6.847787 |
| 1K1B | A | ILE | 133  | H | -7.817530  | 10.551371 | -11.181968 | -4.786549 |
| 1K1B | A | ALA | 134  | H | -7.200708  | 9.585366  | -9.231713  | -3.684954 |
| 1K1B | A | VAL | 135  | H | -6.343026  | 8.699132  | -8.986665  | -3.965475 |
| 1K1B | A | VAL | 136  | H | -5.750777  | 8.955373  | -8.392708  | -4.094147 |
| 1K1B | A | GLN | 137  | H | -5.355936  | 8.165904  | -8.449526  | -4.090883 |
| 1K1B | A | GLY | 138  | H | -5.254688  | 8.056912  | -8.505098  | -4.063297 |
| 1K1B | A | ASN | 139  | C | -5.264302  | 8.032206  | -8.501558  | -4.066537 |
| 1K1B | A | LEU | 140  | C | -5.341731  | 7.976807  | -8.442980  | -4.064348 |
| 1K1B | A | PRO | 141  | H | -5.565039  | 7.460139  | -8.632874  | -4.011497 |
| 1K1B | A | ALA | 142  | H | -6.263061  | 7.751282  | -8.911287  | -3.840565 |
| 1K1B | A | VAL | 143  | H | -7.624866  | 9.884796  | -9.624118  | -3.546485 |
| 1K1B | A | HIS | 144  | H | -8.373297  | 10.000815 | -10.372205 | -3.295178 |
| 1K1B | A | ARG | 145  | H | -8.614807  | 9.690574  | -10.580828 | -3.191322 |
| 1K1B | A | LEU | 146  | H | -9.375990  | 11.203009 | -11.626793 | -3.565874 |
| 1K1B | A | VAL | 147  | H | -9.543482  | 10.810483 | -12.056359 | -3.699451 |
| 1K1B | A | ASN | 148  | H | -9.613136  | 10.354192 | -12.313636 | -3.764313 |
| 1K1B | A | LEU | 149  | H | -9.903845  | 9.893072  | -13.040129 | -3.920350 |
| 1K1B | A | PHE | 150  | H | -9.069305  | 6.905812  | -14.387791 | -4.914906 |
| 1K1B | A | GLN | 151  | H | -7.314634  | 3.401153  | -13.041869 | -4.279447 |
| 1K1B | A | GLN | 152  | H | -6.114632  | 3.229150  | -11.373637 | -4.045432 |
| 1K1B | A | GLY | 153  | H | -5.970871  | 4.371105  | -10.929500 | -4.058367 |
| 1K1B | A | GLY | 154  | H | -5.966667  | 4.418813  | -10.931984 | -4.062217 |
| 1K1B | A | ARG | 155  | C | -5.968389  | 4.424692  | -10.914798 | -4.058067 |
| 1K1B | A | GLU | 156  | C | -6.027073  | 4.592632  | -10.690015 | -4.039792 |
| 1K1B | A | LEU | 157  | T | -6.845661  | 8.734558  | -9.406985  | -4.128624 |
| 1K1B | A | ASP | 158  | T | -8.515771  | 12.083224 | -11.117412 | -4.549361 |
| 1K1B | A | ILE | 159  | T | -8.272056  | 10.450417 | -12.384123 | -5.122287 |
| 1K1B | A | TYR | 160  | T | -8.129529  | 9.913828  | -12.935675 | -5.352449 |
| 1K1B | A | ASN | 161  | C | -7.741406  | 8.841495  | -12.847934 | -5.317396 |
| 1K1B | A | ASN | 162  | B | -7.678971  | 9.023475  | -12.782916 | -5.291208 |
| 1K1B | A | LEU | 163  | T | -7.685015  | 9.006860  | -12.770761 | -5.291005 |
| 1K1B | A | ARG | 164  | T | -7.861265  | 8.945339  | -12.659754 | -5.251492 |
| 1K1B | A | GLN | 165  | T | -7.983561  | 8.884448  | -12.390613 | -5.164034 |
| 1K1B | A | THR | 166  | B | -9.016634  | 10.906343 | -12.188072 | -5.033898 |
| 1K1B | A | PRO | 167  | C | -10.845531 | 16.399410 | -11.820753 | -4.479673 |
| 1K1B | A | LEU | 168  | H | -11.012174 | 17.571309 | -11.177040 | -4.357068 |
| 1K1B | A | HIS | 169  | H | -10.962006 | 17.263266 | -11.220674 | -4.265368 |
| 1K1B | A | LEU | 170  | H | -10.213217 | 14.882986 | -10.669546 | -3.854116 |
| 1K1B | A | ALA | 171  | H | -8.551509  | 11.874100 | -9.419651  | -3.702946 |
| 1K1B | A | VAL | 172  | H | -8.071421  | 12.079155 | -9.090580  | -3.706589 |
| 1K1B | A | ILE | 173  | H | -7.888500  | 11.531912 | -9.413992  | -3.704718 |
| 1K1B | A | THR | 174  | H | -7.497329  | 10.320133 | -9.766673  | -3.740045 |
| 1K1B | A | THR | 175  | H | -7.345525  | 10.508432 | -9.551737  | -3.670355 |
| 1K1B | A | LEU | 176  | C | -7.382645  | 10.514820 | -9.487180  | -3.616625 |
| 1K1B | A | PRO | 177  | C | -7.492066  | 10.168428 | -9.629124  | -3.593733 |
| 1K1B | A | SER | 178  | H | -7.578152  | 10.195410 | -9.523811  | -3.576800 |
| 1K1B | A | VAL | 179  | H | -8.056810  | 11.648175 | -8.751009  | -3.326606 |
| 1K1B | A | VAL | 180  | H | -8.928693  | 13.060811 | -8.385345  | -2.946621 |
| 1K1B | A | ARG | 181  | H | -10.359967 | 13.531792 | -10.511483 | -3.166203 |
| 1K1B | A | LEU | 182  | H | -9.892392  | 13.902411 | -9.679723  | -3.328782 |
| 1K1B | A | LEU | 183  | H | -7.853663  | 10.237379 | -8.987855  | -3.494689 |
| 1K1B | A | VAL | 184  | H | -6.586033  | 8.027114  | -8.914682  | -3.544877 |
| 1K1B | A | THR | 185  | H | -6.485029  | 7.773125  | -9.253396  | -3.585427 |
| 1K1B | A | ALA | 186  | H | -6.480888  | 7.782824  | -9.269437  | -3.585116 |
| 1K1B | A | GLY | 187  | H | -6.481780  | 7.768786  | -9.273740  | -3.586426 |
| 1K1B | A | ALA | 188  | C | -6.540977  | 7.522561  | -9.307889  | -3.595601 |
| 1K1B | A | SER | 189  | C | -7.547522  | 6.597158  | -11.120910 | -3.793775 |
| 1K1B | A | PRO | 190  | T | -9.231857  | 9.686564  | -11.864203 | -3.638731 |
| 1K1B | A | MET | 191  | T | -10.005433 | 10.950640 | -12.700561 | -3.903543 |
| 1K1B | A | ALA | 192  | T | -10.304162 | 11.460760 | -12.877088 | -3.903396 |
| 1K1B | A | LEU | 193  | T | -9.195796  | 9.508499  | -12.441902 | -4.387115 |
| 1K1B | A | ASP | 194  | C | -9.130952  | 9.373081  | -12.819726 | -4.559506 |
| 1K1B | A | ARG | 195  | T | -9.086026  | 9.474250  | -12.958301 | -4.623045 |
| 1K1B | A | HIS | 196  | T | -9.083022  | 9.481550  | -12.975676 | -4.627892 |
| 1K1B | A | GLY | 197  | T | -9.091563  | 9.499849  | -12.963202 | -4.644029 |
| 1K1B | A | GLN | 198  | T | -9.944011  | 9.994572  | -14.977263 | -5.375232 |
| 1K1B | A | THR | 199  | C | -10.444313 | 11.301307 | -14.720119 | -5.278498 |
| 1K1B | A | ALA | 200  | C | -11.145059 | 13.014566 | -14.412153 | -4.766502 |

|      |   |     |     |   |            |           |            |           |
|------|---|-----|-----|---|------------|-----------|------------|-----------|
| 1K1B | A | ALA | 201 | H | -11.257427 | 13.556908 | -13.933652 | -4.595519 |
| 1K1B | A | HIS | 202 | H | -11.610600 | 14.861181 | -13.357727 | -4.348794 |
| 1K1B | A | LEU | 203 | H | -11.187742 | 13.367226 | -13.814551 | -4.513625 |
| 1K1B | A | ALA | 204 | H | -10.767593 | 11.158448 | -14.543059 | -4.689698 |
| 1K1B | A | CYS | 205 | H | -10.606563 | 10.645756 | -15.003029 | -4.899338 |
| 1K1B | A | GLU | 206 | H | -10.439022 | 10.591180 | -14.923466 | -4.854373 |
| 1K1B | A | HIS | 207 | H | -9.922730  | 10.336621 | -13.832504 | -4.541014 |
| 1K1B | A | ARG | 208 | H | -9.621773  | 9.989083  | -13.492069 | -4.418418 |
| 1K1B | A | SER | 209 | C | -9.403462  | 10.927095 | -12.831252 | -4.443661 |
| 1K1B | A | PRO | 210 | C | -9.354782  | 11.188183 | -12.653028 | -4.399101 |
| 1K1B | A | THR | 211 | H | -9.352452  | 11.269737 | -12.585497 | -4.378450 |
| 1K1B | A | CYS | 212 | H | -9.500153  | 11.598463 | -12.452261 | -4.395050 |
| 1K1B | A | LEU | 213 | H | -9.753937  | 12.698729 | -12.099139 | -4.459026 |
| 1K1B | A | ARG | 214 | H | -10.408345 | 12.992784 | -12.453724 | -4.278038 |
| 1K1B | A | ALA | 215 | H | -10.973789 | 13.307397 | -13.359771 | -4.442034 |
| 1K1B | A | LEU | 216 | H | -10.661090 | 14.559937 | -13.519233 | -5.346378 |
| 1K1B | A | LEU | 217 | H | -9.807522  | 11.674843 | -13.548412 | -5.102680 |
| 1K1B | A | ASP | 218 | H | -8.289167  | 6.426232  | -12.512017 | -4.106763 |
| 1K1B | A | SER | 219 | H | -5.369427  | 5.165882  | -9.063443  | -3.889914 |
| 1K1B | A | ALA | 220 | H | -3.379274  | 3.665272  | -6.599780  | -3.320331 |
| 1K1B | A | ALA | 221 | C | -2.758649  | 5.711774  | -5.205878  | -3.391281 |
| 1K1B | A | PRO | 222 | T | -2.730767  | 5.810848  | -5.265056  | -3.414718 |
| 1K1B | A | GLY | 223 | T | -2.730648  | 5.812652  | -5.265395  | -3.414910 |
| 1K1B | A | THR | 224 | T | -2.737668  | 5.819126  | -5.219219  | -3.408476 |
| 1K1B | A | LEU | 225 | T | -2.975896  | 6.868043  | -4.551370  | -3.440371 |
| 1K1B | A | ASP | 226 | C | -4.562884  | 7.788201  | -6.409657  | -3.839958 |
| 1K1B | A | LEU | 227 | T | -7.564979  | 12.265361 | -8.565052  | -4.242483 |
| 1K1B | A | GLU | 228 | T | -9.452159  | 13.015771 | -11.656502 | -4.654878 |
| 1K1B | A | ALA | 229 | T | -9.505046  | 12.959071 | -11.516627 | -4.629350 |
| 1K1B | A | ARG | 230 | T | -10.708925 | 10.921032 | -14.543411 | -4.814890 |
| 1K1B | A | ASN | 231 | B | -9.340807  | 10.252963 | -13.092063 | -5.176327 |
| 1K1B | A | TYR | 232 | T | -8.998441  | 11.018717 | -12.691720 | -5.160737 |
| 1K1B | A | ASP | 233 | T | -8.829366  | 11.148440 | -12.545742 | -5.053753 |
| 1K1B | A | GLY | 234 | T | -8.782937  | 11.409245 | -12.451917 | -5.018471 |
| 1K1B | A | LEU | 235 | T | -8.787996  | 11.442519 | -12.409092 | -5.013855 |
| 1K1B | A | THR | 236 | C | -9.067286  | 12.204031 | -12.048440 | -4.909724 |
| 1K1B | A | ALA | 237 | B | -9.464689  | 12.434510 | -11.920956 | -4.678240 |
| 1K1B | A | LEU | 238 | H | -10.208551 | 14.853356 | -11.439228 | -4.512978 |
| 1K1B | A | HIS | 239 | H | -11.243370 | 15.949980 | -12.262926 | -4.147202 |
| 1K1B | A | VAL | 240 | H | -10.944770 | 13.503345 | -13.114025 | -4.163700 |
| 1K1B | A | ALA | 241 | H | -11.044771 | 12.381694 | -13.842771 | -4.215871 |
| 1K1B | A | VAL | 242 | H | -11.088953 | 11.694886 | -14.346696 | -4.329186 |
| 1K1B | A | ASN | 243 | H | -11.154449 | 10.605457 | -15.219633 | -4.557378 |
| 1K1B | A | THR | 244 | H | -10.352424 | 9.141063  | -16.223629 | -5.678866 |
| 1K1B | A | GLU | 245 | H | -9.759429  | 9.601428  | -15.446701 | -5.891100 |
| 1K1B | A | CYS | 246 | C | -9.175795  | 10.941846 | -13.319239 | -5.300582 |
| 1K1B | A | GLN | 247 | C | -9.107027  | 11.046812 | -13.303508 | -5.267238 |
| 1K1B | A | GLU | 248 | H | -9.093966  | 11.114259 | -13.287177 | -5.253181 |
| 1K1B | A | THR | 249 | H | -9.147440  | 11.379348 | -12.962353 | -5.173659 |
| 1K1B | A | VAL | 250 | H | -9.315687  | 11.851871 | -12.318511 | -4.949420 |
| 1K1B | A | GLN | 251 | H | -10.236025 | 12.503149 | -13.245650 | -4.944336 |
| 1K1B | A | LEU | 252 | H | -11.051150 | 14.518278 | -13.177492 | -4.761666 |
| 1K1B | A | LEU | 253 | H | -10.878043 | 13.369868 | -13.423107 | -4.758951 |
| 1K1B | A | LEU | 254 | H | -9.837461  | 11.013621 | -13.235495 | -4.784404 |
| 1K1B | A | GLU | 255 | H | -9.546330  | 9.806322  | -13.935062 | -4.862257 |
| 1K1B | A | ARG | 256 | H | -9.288657  | 9.882462  | -13.499674 | -4.681023 |
| 1K1B | A | GLY | 257 | H | -8.074152  | 8.907563  | -11.210781 | -4.203539 |
| 1K1B | A | ALA | 258 | C | -7.935199  | 9.226579  | -11.043236 | -4.123765 |
| 1K1B | A | ASP | 259 | C | -7.738008  | 9.317176  | -10.926590 | -4.084685 |
| 1K1B | A | ILE | 260 | T | -7.746701  | 9.347337  | -10.862062 | -4.068846 |
| 1K1B | A | ASP | 261 | T | -7.759065  | 9.307657  | -10.839166 | -4.060617 |
| 1K1B | A | ALA | 262 | T | -8.168710  | 9.780557  | -10.898510 | -3.976625 |
| 1K1B | A | VAL | 263 | T | -8.337470  | 9.104367  | -11.396309 | -4.034885 |
| 1K1B | A | ASP | 264 | C | -8.933469  | 5.791929  | -14.631994 | -4.310154 |
| 1K1B | A | ILE | 265 | T | -8.755344  | 6.156483  | -14.483460 | -4.396986 |
| 1K1B | A | LYS | 266 | T | -8.769795  | 6.178868  | -14.471652 | -4.418517 |
| 1K1B | A | SER | 267 | T | -8.811822  | 6.199194  | -14.471455 | -4.476009 |
| 1K1B | A | GLY | 268 | T | -8.947985  | 6.349547  | -14.495979 | -4.599337 |
| 1K1B | A | ARG | 269 | T | -9.479154  | 7.610527  | -14.133236 | -4.642684 |
| 1K1B | A | SER | 270 | C | -11.181933 | 12.230472 | -14.998039 | -5.000022 |
| 1K1B | A | PRO | 271 | C | -11.569278 | 15.937895 | -13.159996 | -4.523227 |
| 1K1B | A | LEU | 272 | H | -11.534354 | 17.310289 | -12.152757 | -4.343395 |
| 1K1B | A | ILE | 273 | H | -11.568466 | 17.438105 | -12.120604 | -4.362013 |
| 1K1B | A | HIS | 274 | H | -11.556417 | 17.083092 | -12.390948 | -4.417551 |
| 1K1B | A | ALA | 275 | H | -11.394580 | 13.468354 | -14.495285 | -4.807363 |
| 1K1B | A | VAL | 276 | H | -11.413878 | 12.142606 | -15.506408 | -5.041552 |
| 1K1B | A | GLU | 277 | H | -11.495933 | 10.361931 | -16.926422 | -5.368985 |
| 1K1B | A | ASN | 278 | H | -10.812296 | 9.141821  | -16.131427 | -5.159945 |
| 1K1B | A | ASN | 279 | H | -10.438216 | 10.270051 | -15.425684 | -5.262644 |
| 1K1B | A | SER | 280 | C | -10.400331 | 10.817108 | -15.047059 | -5.194667 |
| 1K1B | A | LEU | 281 | C | -10.271237 | 11.367540 | -14.588083 | -5.082687 |

|      |   |     |     |   |            |           |            |           |
|------|---|-----|-----|---|------------|-----------|------------|-----------|
| 1K1B | A | SER | 282 | H | -10.265816 | 11.470974 | -14.528578 | -5.070635 |
| 1K1B | A | MET | 283 | H | -10.447977 | 12.649354 | -14.024797 | -5.069612 |
| 1K1B | A | VAL | 284 | H | -10.797233 | 13.988494 | -13.323423 | -4.766283 |
| 1K1B | A | GLN | 285 | H | -10.666221 | 14.353345 | -12.916025 | -4.747934 |
| 1K1B | A | LEU | 286 | H | -10.075890 | 15.626168 | -10.912998 | -4.588736 |
| 1K1B | A | LEU | 287 | H | -8.207330  | 12.577536 | -9.608282  | -4.538794 |
| 1K1B | A | LEU | 288 | H | -6.481043  | 10.503165 | -8.278890  | -4.378281 |
| 1K1B | A | GLN | 289 | H | -6.439385  | 10.357100 | -8.532507  | -4.410165 |
| 1K1B | A | HIS | 290 | H | -6.426595  | 10.362779 | -8.586437  | -4.410803 |
| 1K1B | A | GLY | 291 | H | -6.416996  | 10.328375 | -8.643245  | -4.409487 |
| 1K1B | A | ALA | 292 | C | -6.442917  | 10.226127 | -8.612339  | -4.402320 |
| 1K1B | A | ASN | 293 | C | -7.703537  | 9.054988  | -11.851977 | -4.663484 |
| 1K1B | A | VAL | 294 | T | -8.208451  | 9.995015  | -11.636781 | -4.416358 |
| 1K1B | A | ASN | 295 | T | -8.550955  | 9.453240  | -12.073330 | -4.394294 |
| 1K1B | A | ALA | 296 | T | -9.170742  | 10.446415 | -12.280174 | -4.480262 |
| 1K1B | A | GLN | 297 | T | -9.457458  | 10.331431 | -12.611865 | -4.708616 |
| 1K1B | A | MET | 298 | B | -10.823316 | 8.909088  | -16.484188 | -5.311866 |
| 1K1B | A | TYR | 299 | T | -10.745578 | 8.836357  | -16.581133 | -5.326750 |
| 1K1B | A | SER | 300 | T | -10.680282 | 8.883057  | -16.600479 | -5.305264 |
| 1K1B | A | GLY | 301 | T | -10.527523 | 9.803576  | -15.922970 | -5.190028 |
| 1K1B | A | SER | 302 | T | -10.649176 | 10.066648 | -15.729523 | -5.139847 |
| 1K1B | A | SER | 303 | C | -10.957664 | 11.588919 | -15.200829 | -5.032429 |
| 1K1B | A | ALA | 304 | B | -11.060398 | 12.502275 | -14.538271 | -4.859324 |
| 1K1B | A | LEU | 305 | H | -11.168919 | 13.350241 | -13.987068 | -4.782537 |
| 1K1B | A | HIS | 306 | H | -11.515103 | 12.596514 | -15.150756 | -4.800408 |
| 1K1B | A | SER | 307 | H | -11.225521 | 11.206157 | -15.345268 | -4.672291 |
| 1K1B | A | ALA | 308 | H | -9.819697  | 9.048925  | -13.670172 | -4.528654 |
| 1K1B | A | SER | 309 | H | -9.641970  | 9.026970  | -13.969770 | -4.639966 |
| 1K1B | A | GLY | 310 | H | -8.908608  | 10.385804 | -12.432608 | -4.684094 |
| 1K1B | A | ARG | 311 | H | -8.804458  | 10.562348 | -12.334746 | -4.620704 |
| 1K1B | A | GLY | 312 | H | -8.592145  | 11.380239 | -11.633899 | -4.496747 |
| 1K1B | A | LEU | 313 | T | -8.650756  | 11.807940 | -11.358509 | -4.477478 |
| 1K1B | A | LEU | 314 | T | -8.634407  | 12.198885 | -11.052309 | -4.388956 |
| 1K1B | A | PRO | 315 | H | -8.917956  | 13.421010 | -10.392394 | -4.107024 |
| 1K1B | A | LEU | 316 | H | -9.043953  | 13.965508 | -10.008687 | -4.056673 |
| 1K1B | A | VAL | 317 | H | -9.654149  | 15.405951 | -9.890706  | -3.757674 |
| 1K1B | A | ARG | 318 | H | -9.141185  | 12.964804 | -9.802222  | -3.392548 |
| 1K1B | A | THR | 319 | H | -8.260100  | 11.155051 | -9.428547  | -3.419064 |
| 1K1B | A | LEU | 320 | H | -6.702073  | 8.628442  | -8.295294  | -3.264645 |
| 1K1B | A | VAL | 321 | H | -5.520114  | 6.898913  | -7.452050  | -3.042403 |
| 1K1B | A | ARG | 322 | H | -5.511242  | 6.889151  | -7.511090  | -3.052016 |
| 1K1B | A | SER | 323 | H | -5.511522  | 6.883390  | -7.513564  | -3.053029 |
| 1K1B | A | GLY | 324 | H | -5.511517  | 6.852527  | -7.537464  | -3.058943 |
| 1K1B | A | ALA | 325 | C | -5.589027  | 6.631277  | -7.452021  | -3.033623 |
| 1K1B | A | ASP | 326 | C | -7.647388  | 6.866215  | -11.898825 | -3.931685 |
| 1K1B | A | SER | 327 | T | -8.116646  | 7.601637  | -12.484224 | -4.227862 |
| 1K1B | A | SER | 328 | T | -8.158045  | 7.594984  | -12.417360 | -4.222519 |
| 1K1B | A | LEU | 329 | T | -8.818008  | 8.936102  | -12.725505 | -4.342539 |
| 1K1B | A | LYS | 330 | T | -7.491229  | 4.473097  | -13.589641 | -4.929237 |
| 1K1B | A | ASN | 331 | C | -6.418517  | 4.437702  | -12.279785 | -4.878732 |
| 1K1B | A | CYS | 332 | T | -6.201932  | 4.927824  | -12.040466 | -4.841380 |
| 1K1B | A | HIS | 333 | T | -6.197299  | 4.958652  | -12.042769 | -4.838631 |
| 1K1B | A | ASN | 334 | T | -6.197330  | 4.961019  | -12.040852 | -4.838346 |
| 1K1B | A | ASP | 335 | T | -6.260671  | 5.085251  | -11.851617 | -4.822735 |
| 1K1B | A | THR | 336 | C | -6.775355  | 7.052983  | -11.077545 | -4.596366 |
| 1K1B | A | PRO | 337 | C | -7.381642  | 11.452744 | -8.808507  | -3.759835 |
| 1K1B | A | LEU | 338 | G | -7.150388  | 11.058232 | -8.663841  | -3.629102 |
| 1K1B | A | MET | 339 | G | -7.084343  | 10.788735 | -8.887987  | -3.629043 |
| 1K1B | A | VAL | 340 | G | -7.090204  | 10.732258 | -8.876987  | -3.606515 |
| 1K1B | A | ALA | 341 | G | -7.171778  | 10.031679 | -9.154696  | -3.469312 |
| 1K1B | A | ARG | 342 | C | -7.351397  | 9.290636  | -9.667537  | -3.414394 |
| 1K1B | A | SER | 343 | C | -7.686871  | 8.857799  | -10.554616 | -3.420744 |
| 1K1B | A | ARG | 344 | C | -7.677435  | 10.678643 | -10.540815 | -4.055684 |
| 1K1B | A | ARG | 345 | H | -7.690809  | 10.923353 | -10.506893 | -4.138894 |
| 1K1B | A | VAL | 346 | H | -7.705148  | 13.335856 | -10.270407 | -4.917196 |
| 1K1B | A | ILE | 347 | H | -6.724763  | 11.442157 | -8.793120  | -4.622790 |
| 1K1B | A | ASP | 348 | H | -5.973254  | 9.824546  | -8.120060  | -4.165346 |
| 1K1B | A | ILE | 349 | H | -4.859741  | 9.072775  | -5.974915  | -3.327295 |
| 1K1B | A | LEU | 350 | H | -4.859741  | 9.072775  | -5.974915  | -3.327295 |
| 1K1B | A | ARG | 351 | H | -4.859741  | 9.072775  | -5.974915  | -3.327295 |
| 1K1B | A | GLY | 352 | H | -4.859741  | 9.072775  | -5.974915  | -3.327295 |
| 1K59 | A | ASP | 2   | C | -5.274884  | 3.757898  | -9.074314  | -3.316776 |
| 1K59 | A | ASN | 3   | C | -5.274884  | 3.757898  | -9.074314  | -3.316776 |
| 1K59 | A | SER | 4   | H | -5.274884  | 3.757898  | -9.074314  | -3.316776 |
| 1K59 | A | ARG | 5   | H | -5.274884  | 3.757898  | -9.074314  | -3.316776 |
| 1K59 | A | TYR | 6   | H | -9.002668  | 10.046781 | -13.479526 | -5.045394 |
| 1K59 | A | THR | 7   | H | -9.393992  | 10.962079 | -13.795913 | -5.378837 |
| 1K59 | A | HIS | 8   | H | -10.211394 | 12.743393 | -14.284095 | -5.630280 |
| 1K59 | A | PHE | 9   | H | -10.683311 | 14.451572 | -12.562210 | -4.838595 |
| 1K59 | A | LEU | 10  | H | -10.686914 | 14.432038 | -12.530025 | -4.822818 |
| 1K59 | A | THR | 11  | H | -10.691946 | 14.397519 | -12.508812 | -4.816580 |



|      |   |     |    |   |            |           |            |           |
|------|---|-----|----|---|------------|-----------|------------|-----------|
| 1K59 | A | GLN | 12 | H | -12.535222 | 15.533302 | -14.871704 | -5.347031 |
| 1K59 | A | HIS | 13 | H | -13.325215 | 12.275686 | -17.579133 | -5.246568 |
| 1K59 | A | TYR | 14 | B | -10.592448 | 10.738862 | -13.933246 | -4.606353 |
| 1K59 | A | ASP | 15 | T | -7.053009  | 6.918369  | -10.565081 | -3.987915 |
| 1K59 | A | ALA | 16 | T | -4.111184  | 5.531442  | -7.232269  | -3.762792 |
| 1K59 | A | LYS | 17 | T | -4.094878  | 5.579260  | -7.301796  | -3.779205 |
| 1K59 | A | PRO | 18 | T | -4.093045  | 5.585048  | -7.315787  | -3.782148 |
| 1K59 | A | GLN | 19 | T | -4.092871  | 5.585119  | -7.317991  | -3.782547 |
| 1K59 | A | GLY | 20 | T | -4.096861  | 5.576090  | -7.296250  | -3.781160 |
| 1K59 | A | ARG | 21 | T | -6.161792  | 7.285411  | -10.045735 | -4.405374 |
| 1K59 | A | ASP | 22 | C | -7.452145  | 7.313348  | -12.142421 | -4.760432 |
| 1K59 | A | ASP | 23 | H | -8.782518  | 6.234014  | -14.907656 | -5.068315 |
| 1K59 | A | ARG | 24 | H | -9.891187  | 7.034975  | -15.589858 | -4.846983 |
| 1K59 | A | TYR | 25 | H | -11.034947 | 9.121865  | -15.957801 | -5.011782 |
| 1K59 | A | CYS | 26 | H | -11.035050 | 9.123153  | -15.960503 | -5.017147 |
| 1K59 | A | GLU | 27 | H | -12.989147 | 11.503363 | -18.817826 | -5.554818 |
| 1K59 | A | SER | 28 | H | -12.741891 | 11.021247 | -18.096623 | -5.108783 |
| 1K59 | A | ILE | 29 | H | -12.770331 | 11.059628 | -18.005432 | -5.090258 |
| 1K59 | A | MET | 30 | H | -12.646126 | 10.705164 | -18.297963 | -5.153569 |
| 1K59 | A | ARG | 31 | H | -12.289342 | 9.454186  | -18.138121 | -5.001877 |
| 1K59 | A | ARG | 32 | H | -11.673980 | 9.914707  | -17.325092 | -5.304714 |
| 1K59 | A | ARG | 33 | H | -10.221251 | 10.762920 | -14.458464 | -5.233260 |
| 1K59 | A | GLY | 34 | C | -6.623501  | 9.758747  | -9.119464  | -4.461463 |
| 1K59 | A | LEU | 35 | T | -6.612740  | 9.789948  | -9.166229  | -4.467157 |
| 1K59 | A | THR | 36 | T | -6.605317  | 9.785808  | -9.218167  | -4.473899 |
| 1K59 | A | SER | 37 | T | -6.600587  | 9.765587  | -9.260311  | -4.476781 |
| 1K59 | A | PRO | 38 | T | -6.599712  | 9.763887  | -9.267702  | -4.477732 |
| 1K59 | A | CYS | 39 | T | -8.479381  | 9.933372  | -13.003293 | -4.902715 |
| 1K59 | A | LYS | 40 | T | -8.792360  | 8.851221  | -13.969732 | -5.010719 |
| 1K59 | A | ASP | 41 | T | -9.203454  | 8.251119  | -14.590060 | -5.013440 |
| 1K59 | A | ILE | 42 | E | -9.831055  | 10.076144 | -14.654637 | -5.329796 |
| 1K59 | A | ASN | 43 | E | -10.851701 | 10.868804 | -16.583721 | -6.021294 |
| 1K59 | A | THR | 44 | E | -11.172905 | 11.868455 | -16.053295 | -6.001388 |
| 1K59 | A | PHE | 45 | E | -12.512497 | 15.270722 | -16.142573 | -5.529927 |
| 1K59 | A | ILE | 46 | E | -10.824130 | 11.594131 | -15.118133 | -5.531773 |
| 1K59 | A | HIS | 47 | C | -10.496206 | 10.161784 | -15.918520 | -5.566785 |
| 1K59 | A | GLY | 48 | C | -9.137210  | 6.766592  | -15.110879 | -5.145453 |
| 1K59 | A | ASN | 49 | C | -9.022256  | 7.593579  | -14.764505 | -5.097767 |
| 1K59 | A | LYS | 50 | H | -9.019163  | 7.619683  | -14.764682 | -5.096786 |
| 1K59 | A | ARG | 51 | H | -9.043439  | 7.463441  | -14.752781 | -5.073405 |
| 1K59 | A | SER | 52 | H | -9.063234  | 7.465391  | -14.663825 | -5.052046 |
| 1K59 | A | ILE | 53 | H | -9.939006  | 12.015377 | -13.255293 | -4.902154 |
| 1K59 | A | LYS | 54 | H | -10.800851 | 13.765604 | -14.392134 | -5.174747 |
| 1K59 | A | ALA | 55 | G | -10.196310 | 10.127721 | -15.152585 | -5.138226 |
| 1K59 | A | ILE | 56 | G | -8.336132  | 6.559861  | -13.934249 | -5.060632 |
| 1K59 | A | CYS | 57 | G | -7.921293  | 5.336330  | -14.851229 | -5.341902 |
| 1K59 | A | GLU | 58 | T | -7.543784  | 4.755885  | -14.989167 | -5.409629 |
| 1K59 | A | ASN | 59 | T | -7.265070  | 5.259529  | -14.705956 | -5.529077 |
| 1K59 | A | LYS | 60 | T | -7.017631  | 5.535052  | -14.301437 | -5.470391 |
| 1K59 | A | ASN | 61 | T | -7.073875  | 5.476607  | -14.363457 | -5.521380 |
| 1K59 | A | GLY | 62 | E | -6.770208  | 6.635030  | -12.834316 | -5.159903 |
| 1K59 | A | ASN | 63 | E | -5.725468  | 7.007924  | -10.017448 | -4.600801 |
| 1K59 | A | PRO | 64 | E | -4.474215  | 5.820468  | -8.361847  | -4.174752 |
| 1K59 | A | HIS | 65 | E | -4.012710  | 6.832864  | -7.603846  | -4.190494 |
| 1K59 | A | ARG | 66 | T | -4.012586  | 6.833170  | -7.604740  | -4.190469 |
| 1K59 | A | GLU | 67 | T | -4.015265  | 6.829090  | -7.587731  | -4.187792 |
| 1K59 | A | ASN | 68 | T | -4.044121  | 6.819372  | -7.487415  | -4.171220 |
| 1K59 | A | LEU | 69 | E | -4.374513  | 7.679375  | -6.981722  | -4.204276 |
| 1K59 | A | ARG | 70 | E | -8.830703  | 8.355453  | -12.869340 | -4.550766 |
| 1K59 | A | ILE | 71 | E | -10.568944 | 9.770169  | -15.843774 | -5.328804 |
| 1K59 | A | SER | 72 | E | -10.588375 | 9.801718  | -15.595062 | -5.219936 |
| 1K59 | A | LYS | 73 | C | -10.544722 | 9.970790  | -15.616950 | -5.234549 |
| 1K59 | A | SER | 74 | C | -10.529442 | 10.083705 | -15.604057 | -5.227711 |
| 1K59 | A | SER | 75 | C | -10.513769 | 10.255426 | -15.572316 | -5.231136 |
| 1K59 | A | PHE | 76 | E | -11.203887 | 12.645650 | -15.570955 | -5.408905 |
| 1K59 | A | GLN | 77 | E | -11.632081 | 13.502230 | -15.878843 | -5.437476 |
| 1K59 | A | VAL | 78 | E | -11.547782 | 13.149269 | -15.832499 | -5.396346 |
| 1K59 | A | THR | 79 | E | -11.608258 | 12.890399 | -16.065190 | -5.480044 |
| 1K59 | A | THR | 80 | E | -11.690021 | 12.114675 | -16.507514 | -5.521648 |
| 1K59 | A | CYS | 81 | E | -11.350349 | 10.584337 | -17.237732 | -5.670215 |
| 1K59 | A | LYS | 82 | E | -8.055137  | 7.000488  | -13.815640 | -5.529014 |
| 1K59 | A | LEU | 83 | E | -6.049551  | 5.860794  | -11.154068 | -4.943046 |
| 1K59 | A | HIS | 84 | E | -4.369354  | 3.846460  | -9.677324  | -4.599642 |
| 1K59 | A | GLY | 85 | C | -3.718954  | 4.636776  | -8.391204  | -4.285167 |
| 1K59 | A | GLY | 86 | C | -3.663231  | 4.812079  | -8.353259  | -4.241053 |
| 1K59 | A | SER | 87 | C | -3.658709  | 4.822712  | -8.359112  | -4.233463 |
| 1K59 | A | PRO | 88 | C | -3.665682  | 4.817412  | -8.322691  | -4.220967 |
| 1K59 | A | TRP | 89 | T | -3.865482  | 5.260285  | -7.814247  | -4.074586 |
| 1K59 | A | PRO | 90 | T | -4.999747  | 6.592616  | -8.253620  | -3.791697 |
| 1K59 | A | PRO | 91 | T | -6.137500  | 6.708114  | -10.092975 | -3.872063 |
| 1K59 | A | CYS | 92 | T | -6.592401  | 7.237938  | -10.854564 | -4.424423 |

|      |   |     |     |   |            |           |            |           |
|------|---|-----|-----|---|------------|-----------|------------|-----------|
| 1K59 | A | GLN | 93  | E | -7.457128  | 7.874227  | -12.586554 | -5.255010 |
| 1K59 | A | TYR | 94  | E | -9.463879  | 11.276521 | -12.934727 | -5.158027 |
| 1K59 | A | ARG | 95  | E | -9.099629  | 6.754255  | -14.005608 | -4.537772 |
| 1K59 | A | ALA | 96  | E | -6.379154  | 8.471653  | -9.843743  | -4.714947 |
| 1K59 | A | THR | 97  | E | -6.374396  | 8.477080  | -9.873434  | -4.717644 |
| 1K59 | A | ALA | 98  | E | -6.370261  | 8.483158  | -9.900547  | -4.721194 |
| 1K59 | A | GLY | 99  | E | -6.369603  | 8.486608  | -9.904976  | -4.721745 |
| 1K59 | A | PHE | 100 | E | -6.375340  | 8.506302  | -9.864725  | -4.723666 |
| 1K59 | A | ARG | 101 | E | -8.806185  | 9.540043  | -13.654734 | -5.132745 |
| 1K59 | A | ASN | 102 | C | -9.184881  | 10.013095 | -13.713930 | -5.181571 |
| 1K59 | A | VAL | 103 | C | -9.715091  | 13.721561 | -11.795016 | -4.402865 |
| 1K59 | A | VAL | 104 | E | -9.710912  | 13.987092 | -11.309940 | -4.127972 |
| 1K59 | A | VAL | 105 | E | -7.471401  | 9.176765  | -10.610484 | -4.457950 |
| 1K59 | A | ALA | 106 | E | -4.740558  | 5.865788  | -9.287848  | -4.855142 |
| 1K59 | A | CYS | 107 | E | -3.740607  | 6.778045  | -8.059626  | -5.018096 |
| 1K59 | A | GLU | 108 | E | -3.652395  | 7.163616  | -7.925487  | -4.960757 |
| 1K59 | A | ASN | 109 | T | -3.647787  | 7.202319  | -7.923884  | -4.956787 |
| 1K59 | A | GLY | 110 | T | -3.648643  | 7.200052  | -7.919919  | -4.957457 |
| 1K59 | A | LEU | 111 | E | -3.750060  | 7.450550  | -7.661950  | -4.972511 |
| 1K59 | A | PRO | 112 | E | -4.793394  | 9.683895  | -7.097766  | -4.576891 |
| 1K59 | A | VAL | 113 | E | -6.506833  | 12.157676 | -7.804437  | -4.435234 |
| 1K59 | A | HIS | 114 | E | -8.268062  | 11.989915 | -11.277041 | -4.676057 |
| 1K59 | A | LEU | 115 | E | -8.329890  | 11.284670 | -11.851073 | -4.797386 |
| 1K59 | A | ASP | 116 | C | -8.279427  | 11.459194 | -12.066028 | -5.013454 |
| 1K59 | A | GLY | 117 | C | -8.074338  | 11.937403 | -12.026967 | -5.278938 |
| 1K59 | A | SER | 118 | G | -8.063061  | 12.191062 | -11.876320 | -5.280991 |
| 1K59 | A | ILE | 119 | G | -7.476409  | 12.679524 | -9.452357  | -4.491058 |
| 1K59 | A | PHE | 120 | G | -5.805397  | 10.692014 | -6.255814  | -3.286408 |
| 1K59 | A | ARG | 121 | C | -5.805397  | 10.692014 | -6.255814  | -3.286408 |
| 1K59 | A | ARG | 122 | C | -5.805397  | 10.692014 | -6.255814  | -3.286408 |
| 1K59 | A | PRO | 123 | C | -5.805397  | 10.692014 | -6.255814  | -3.286408 |
| 1KAO | A | MET | 1   | C | -8.180909  | 10.604419 | -10.480058 | -4.255988 |
| 1KAO | A | ARG | 2   | C | -8.180909  | 10.604419 | -10.480058 | -4.255988 |
| 1KAO | A | GLU | 3   | E | -8.180909  | 10.604419 | -10.480058 | -4.255988 |
| 1KAO | A | TYR | 4   | E | -8.180909  | 10.604419 | -10.480058 | -4.255988 |
| 1KAO | A | LYS | 5   | E | -10.856847 | 13.054275 | -14.501351 | -5.589624 |
| 1KAO | A | VAL | 6   | E | -10.250055 | 16.049177 | -10.054139 | -4.053338 |
| 1KAO | A | VAL | 7   | E | -10.153998 | 15.782889 | -10.446953 | -4.117487 |
| 1KAO | A | VAL | 8   | E | -9.193270  | 12.862219 | -11.662521 | -4.769297 |
| 1KAO | A | LEU | 9   | E | -8.569188  | 10.245545 | -12.971771 | -5.185667 |
| 1KAO | A | GLY | 10  | C | -7.327972  | 7.293708  | -12.665698 | -5.203689 |
| 1KAO | A | SER | 11  | T | -6.826187  | 7.504523  | -12.275517 | -5.258096 |
| 1KAO | A | GLY | 12  | T | -6.757250  | 7.631968  | -12.356100 | -5.295112 |
| 1KAO | A | GLY | 13  | T | -6.764691  | 7.573494  | -12.363876 | -5.300116 |
| 1KAO | A | VAL | 14  | T | -6.783050  | 7.534835  | -12.323230 | -5.296485 |
| 1KAO | A | GLY | 15  | C | -7.037649  | 7.889016  | -12.163196 | -5.344900 |
| 1KAO | A | LYS | 16  | H | -8.055517  | 8.723732  | -13.038329 | -5.585764 |
| 1KAO | A | SER | 17  | H | -10.520812 | 12.014698 | -14.850412 | -5.103519 |
| 1KAO | A | ALA | 18  | H | -10.802001 | 13.277684 | -14.077063 | -4.854551 |
| 1KAO | A | LEU | 19  | H | -11.128224 | 14.494112 | -13.515573 | -4.771999 |
| 1KAO | A | THR | 20  | H | -11.499144 | 15.579879 | -12.714040 | -4.495349 |
| 1KAO | A | VAL | 21  | H | -11.520104 | 15.554848 | -12.663649 | -4.475545 |
| 1KAO | A | GLN | 22  | H | -11.213597 | 13.851690 | -14.608797 | -5.659260 |
| 1KAO | A | PHE | 23  | H | -7.486730  | 11.001105 | -9.825298  | -4.633507 |
| 1KAO | A | VAL | 24  | H | -6.869800  | 10.420629 | -9.923011  | -4.704255 |
| 1KAO | A | THR | 25  | H | -6.450299  | 10.929734 | -9.350649  | -4.669432 |
| 1KAO | A | GLY | 26  | C | -5.911940  | 10.179624 | -9.028489  | -4.614563 |
| 1KAO | A | THR | 27  | C | -5.738323  | 10.022377 | -9.008388  | -4.536381 |
| 1KAO | A | PHE | 28  | C | -5.748746  | 10.069166 | -8.980874  | -4.541480 |
| 1KAO | A | ILE | 29  | C | -5.733255  | 10.060209 | -8.993356  | -4.549241 |
| 1KAO | A | GLU | 30  | C | -5.758959  | 9.672435  | -9.227081  | -4.563347 |
| 1KAO | A | LYS | 31  | C | -6.021182  | 9.545319  | -9.717320  | -4.560722 |
| 1KAO | A | TYR | 32  | C | -6.280948  | 9.472279  | -10.319456 | -4.711622 |
| 1KAO | A | ASP | 33  | T | -5.980404  | 8.833792  | -9.911069  | -4.486723 |
| 1KAO | A | PRO | 34  | T | -6.098522  | 8.570871  | -9.932042  | -4.425571 |
| 1KAO | A | THR | 35  | T | -6.221954  | 8.611820  | -9.752246  | -4.339804 |
| 1KAO | A | ILE | 36  | T | -6.373748  | 8.531807  | -9.558370  | -4.260766 |
| 1KAO | A | GLU | 37  | C | -6.435437  | 8.502747  | -9.391439  | -4.241146 |
| 1KAO | A | ASP | 38  | E | -8.518143  | 10.516125 | -12.041693 | -4.772308 |
| 1KAO | A | PHE | 39  | E | -8.639734  | 10.712296 | -11.729845 | -4.772474 |
| 1KAO | A | TYR | 40  | E | -11.004927 | 15.823294 | -13.710201 | -5.280868 |
| 1KAO | A | ARG | 41  | E | -7.983184  | 12.828119 | -9.679021  | -4.754954 |
| 1KAO | A | LYS | 42  | E | -7.858121  | 12.892068 | -9.860719  | -4.764993 |
| 1KAO | A | GLU | 43  | E | -7.626817  | 12.229413 | -10.323009 | -4.805297 |
| 1KAO | A | ILE | 44  | E | -7.028449  | 10.187194 | -10.175299 | -4.438724 |
| 1KAO | A | GLU | 45  | E | -5.947126  | 7.231542  | -9.639860  | -4.135645 |
| 1KAO | A | VAL | 46  | E | -5.798215  | 6.948620  | -9.763023  | -4.078326 |
| 1KAO | A | ASP | 47  | T | -5.792534  | 6.902449  | -9.806278  | -4.078028 |
| 1KAO | A | SER | 48  | T | -5.800096  | 6.849327  | -9.789771  | -4.066095 |
| 1KAO | A | SER | 49  | E | -5.849407  | 6.661389  | -9.763908  | -4.051884 |
| 1KAO | A | PRO | 50  | E | -6.585432  | 6.655845  | -10.322574 | -3.988885 |

|      |   |     |     |   |            |           |            |           |
|------|---|-----|-----|---|------------|-----------|------------|-----------|
| 1KAO | A | SER | 51  | E | -8.188054  | 6.759763  | -12.877738 | -4.314835 |
| 1KAO | A | VAL | 52  | E | -9.434580  | 9.933346  | -12.645461 | -4.150075 |
| 1KAO | A | LEU | 53  | E | -10.838150 | 13.513253 | -13.043540 | -4.385779 |
| 1KAO | A | GLU | 54  | E | -11.787673 | 16.899539 | -13.530971 | -5.096525 |
| 1KAO | A | ILE | 55  | E | -12.070015 | 17.344027 | -13.634635 | -4.928472 |
| 1KAO | A | LEU | 56  | E | -11.465950 | 14.002866 | -14.661816 | -5.109555 |
| 1KAO | A | ASP | 57  | E | -10.667598 | 11.279686 | -15.155730 | -5.304761 |
| 1KAO | A | THR | 58  | C | -7.134348  | 8.382397  | -10.882069 | -4.729910 |
| 1KAO | A | ALA | 59  | C | -6.842514  | 7.813350  | -11.431436 | -4.824561 |
| 1KAO | A | GLY | 60  | T | -6.610237  | 7.716083  | -11.693100 | -4.977343 |
| 1KAO | A | THR | 61  | T | -6.566501  | 7.697764  | -11.792084 | -4.985098 |
| 1KAO | A | GLU | 62  | T | -6.562205  | 7.688417  | -11.815526 | -4.985309 |
| 1KAO | A | GLN | 63  | T | -6.843536  | 7.266930  | -12.403558 | -5.141704 |
| 1KAO | A | PHE | 64  | C | -7.133493  | 7.492487  | -12.483822 | -5.246796 |
| 1KAO | A | ALA | 65  | H | -8.042297  | 7.413055  | -13.381188 | -5.069498 |
| 1KAO | A | SER | 66  | H | -9.209902  | 7.063608  | -15.201180 | -4.964331 |
| 1KAO | A | MET | 67  | H | -9.915254  | 7.654394  | -15.538510 | -4.777442 |
| 1KAO | A | ARG | 68  | H | -10.327734 | 8.416001  | -15.155036 | -4.705154 |
| 1KAO | A | ASP | 69  | H | -11.835148 | 9.985470  | -17.268332 | -5.031663 |
| 1KAO | A | LEU | 70  | H | -10.702771 | 12.265731 | -13.816081 | -4.858305 |
| 1KAO | A | TYR | 71  | H | -9.918487  | 13.219555 | -12.980649 | -5.208572 |
| 1KAO | A | ILE | 72  | H | -8.304373  | 9.616812  | -12.534365 | -5.193341 |
| 1KAO | A | LYS | 73  | H | -7.113969  | 7.173127  | -12.575945 | -5.327868 |
| 1KAO | A | ASN | 74  | H | -7.110367  | 7.198957  | -12.584877 | -5.328809 |
| 1KAO | A | GLY | 75  | C | -7.109715  | 7.211841  | -12.582327 | -5.329195 |
| 1KAO | A | GLN | 76  | C | -7.113407  | 7.173974  | -12.581040 | -5.329073 |
| 1KAO | A | GLY | 77  | E | -7.191396  | 6.886436  | -12.585231 | -5.346201 |
| 1KAO | A | PHE | 78  | E | -9.754184  | 13.745317 | -12.797625 | -5.159493 |
| 1KAO | A | ILE | 79  | E | -10.197920 | 16.360928 | -11.368216 | -4.797062 |
| 1KAO | A | LEU | 80  | E | -10.735395 | 19.064682 | -9.752441  | -4.308511 |
| 1KAO | A | VAL | 81  | E | -10.812289 | 19.137174 | -9.463558  | -4.215310 |
| 1KAO | A | TYR | 82  | E | -12.055238 | 17.482932 | -13.714839 | -5.069704 |
| 1KAO | A | SER | 83  | E | -10.613619 | 12.287498 | -14.256828 | -5.257400 |
| 1KAO | A | LEU | 84  | T | -10.387662 | 11.780221 | -14.612123 | -5.280731 |
| 1KAO | A | VAL | 85  | T | -9.915876  | 9.861198  | -15.340363 | -5.401096 |
| 1KAO | A | ASN | 86  | T | -9.911986  | 9.857232  | -15.366596 | -5.407895 |
| 1KAO | A | GLN | 87  | H | -9.921255  | 9.756605  | -15.387754 | -5.409742 |
| 1KAO | A | GLN | 88  | H | -10.119100 | 8.933623  | -15.825229 | -5.464777 |
| 1KAO | A | SER | 89  | H | -10.257428 | 8.391832  | -15.972186 | -5.506545 |
| 1KAO | A | PHE | 90  | H | -12.279163 | 13.403510 | -17.067852 | -5.839194 |
| 1KAO | A | GLN | 91  | H | -11.001113 | 10.592591 | -15.559686 | -5.258471 |
| 1KAO | A | ASP | 92  | H | -10.842857 | 10.946861 | -15.567090 | -5.294048 |
| 1KAO | A | ILE | 93  | H | -10.831563 | 11.052949 | -15.553384 | -5.295675 |
| 1KAO | A | LYS | 94  | H | -10.795813 | 11.133880 | -15.621653 | -5.315770 |
| 1KAO | A | PRO | 95  | H | -10.812694 | 10.991967 | -15.634005 | -5.305178 |
| 1KAO | A | MET | 96  | H | -11.498812 | 12.423690 | -15.932036 | -5.475577 |
| 1KAO | A | ARG | 97  | H | -12.160646 | 13.091197 | -16.756113 | -5.561528 |
| 1KAO | A | ASP | 98  | H | -11.770861 | 10.792056 | -16.672764 | -5.005079 |
| 1KAO | A | GLN | 99  | H | -11.158490 | 11.522826 | -14.588890 | -4.461468 |
| 1KAO | A | ILE | 100 | H | -9.838957  | 16.675127 | -13.084429 | -6.629710 |
| 1KAO | A | ILE | 101 | H | -9.258559  | 13.723680 | -12.766968 | -5.480322 |
| 1KAO | A | ARG | 102 | H | -8.334622  | 10.483342 | -11.624333 | -4.449212 |
| 1KAO | A | VAL | 103 | H | -7.268150  | 9.277059  | -10.782312 | -4.545070 |
| 1KAO | A | LYS | 104 | H | -6.374236  | 7.399563  | -10.577394 | -4.474695 |
| 1KAO | A | ARG | 105 | T | -4.511714  | 8.045967  | -6.707062  | -3.863599 |
| 1KAO | A | TYR | 106 | T | -4.480779  | 8.164136  | -6.765877  | -3.876039 |
| 1KAO | A | GLU | 107 | T | -4.443839  | 8.381167  | -6.746373  | -3.868614 |
| 1KAO | A | LYS | 108 | C | -4.442565  | 8.440259  | -6.709705  | -3.860223 |
| 1KAO | A | VAL | 109 | C | -4.460438  | 8.490755  | -6.592039  | -3.841732 |
| 1KAO | A | PRO | 110 | C | -5.705415  | 11.459265 | -7.010254  | -3.877591 |
| 1KAO | A | VAL | 111 | E | -6.010286  | 12.202130 | -6.430573  | -3.722987 |
| 1KAO | A | ILE | 112 | E | -7.196541  | 15.367661 | -5.832523  | -3.506216 |
| 1KAO | A | LEU | 113 | E | -9.163400  | 17.800404 | -8.072863  | -3.844706 |
| 1KAO | A | VAL | 114 | E | -9.705532  | 16.097668 | -9.881337  | -4.079637 |
| 1KAO | A | GLY | 115 | E | -9.771327  | 15.491250 | -10.363612 | -4.247845 |
| 1KAO | A | ASN | 116 | E | -10.652591 | 11.551481 | -15.706616 | -5.399869 |
| 1KAO | A | LYS | 117 | T | -9.679145  | 9.946421  | -14.798820 | -5.504050 |
| 1KAO | A | VAL | 118 | T | -7.713522  | 7.062044  | -12.570055 | -4.829748 |
| 1KAO | A | ASP | 119 | T | -7.115072  | 6.002289  | -12.763001 | -4.825055 |
| 1KAO | A | LEU | 120 | T | -7.066084  | 6.088862  | -12.800802 | -4.809976 |
| 1KAO | A | GLU | 121 | G | -7.061816  | 6.093155  | -12.821270 | -4.812120 |
| 1KAO | A | SER | 122 | G | -7.067525  | 6.057636  | -12.805601 | -4.805265 |
| 1KAO | A | GLU | 123 | G | -7.299509  | 5.627543  | -12.958409 | -4.805637 |
| 1KAO | A | ARG | 124 | C | -8.502690  | 7.126532  | -13.507941 | -4.693462 |
| 1KAO | A | GLU | 125 | C | -9.880450  | 7.215880  | -15.794682 | -5.153522 |
| 1KAO | A | VAL | 126 | C | -11.000744 | 8.644239  | -16.532908 | -4.812687 |
| 1KAO | A | SER | 127 | C | -10.268527 | 6.829134  | -16.297790 | -4.865912 |
| 1KAO | A | SER | 128 | H | -10.058450 | 7.082946  | -16.157252 | -4.809910 |
| 1KAO | A | SER | 129 | H | -9.441689  | 6.741838  | -15.247925 | -4.568111 |
| 1KAO | A | GLU | 130 | H | -9.361727  | 7.223858  | -15.090591 | -4.579391 |
| 1KAO | A | GLY | 131 | H | -9.094312  | 8.404046  | -14.122210 | -4.463437 |

|      |   |     |     |   |            |           |            |           |
|------|---|-----|-----|---|------------|-----------|------------|-----------|
| 1KAO | A | ARG | 132 | H | -8.858597  | 8.727384  | -13.246017 | -4.162461 |
| 1KAO | A | ALA | 133 | H | -7.539328  | 7.360379  | -11.172102 | -3.868830 |
| 1KAO | A | LEU | 134 | H | -7.548028  | 7.444468  | -11.094571 | -3.865234 |
| 1KAO | A | ALA | 135 | H | -7.301577  | 8.118206  | -11.258595 | -4.230248 |
| 1KAO | A | GLU | 136 | H | -6.572581  | 8.482723  | -11.028212 | -4.964869 |
| 1KAO | A | GLU | 137 | H | -6.553641  | 8.572170  | -11.051176 | -4.982954 |
| 1KAO | A | TRP | 138 | H | -6.662660  | 8.868689  | -11.074304 | -5.217624 |
| 1KAO | A | GLY | 139 | C | -6.657473  | 8.895384  | -11.082409 | -5.217004 |
| 1KAO | A | CYS | 140 | C | -6.730441  | 8.825693  | -11.014446 | -5.254140 |
| 1KAO | A | PRO | 141 | C | -8.308321  | 11.304489 | -11.945287 | -5.171579 |
| 1KAO | A | PHE | 142 | E | -9.172233  | 12.946047 | -12.167220 | -5.153596 |
| 1KAO | A | MET | 143 | E | -9.262739  | 12.407638 | -12.257554 | -5.116794 |
| 1KAO | A | GLU | 144 | E | -10.581417 | 15.223655 | -13.808142 | -5.614213 |
| 1KAO | A | THR | 145 | C | -10.283604 | 13.248318 | -14.223738 | -5.470772 |
| 1KAO | A | SER | 146 | T | -10.460103 | 11.857953 | -15.031994 | -5.464489 |
| 1KAO | A | ALA | 147 | T | -9.811748  | 9.901866  | -14.861163 | -5.232551 |
| 1KAO | A | LYS | 148 | T | -9.426960  | 9.030833  | -15.099145 | -5.315867 |
| 1KAO | A | SER | 149 | T | -9.376755  | 8.841753  | -15.139020 | -5.248101 |
| 1KAO | A | LYS | 150 | H | -9.381801  | 8.593222  | -15.227011 | -5.214907 |
| 1KAO | A | THR | 151 | H | -9.165306  | 8.388773  | -14.991941 | -5.045452 |
| 1KAO | A | MET | 152 | H | -9.315272  | 8.220979  | -15.054621 | -5.019519 |
| 1KAO | A | VAL | 153 | H | -9.616602  | 8.304413  | -14.837150 | -4.757270 |
| 1KAO | A | ASP | 154 | H | -9.725677  | 8.244870  | -14.723851 | -4.737942 |
| 1KAO | A | GLU | 155 | H | -9.840338  | 8.138420  | -14.529803 | -4.686711 |
| 1KAO | A | LEU | 156 | H | -12.029045 | 14.992845 | -14.991650 | -4.936945 |
| 1KAO | A | PHE | 157 | H | -12.109634 | 17.499977 | -13.737063 | -4.867030 |
| 1KAO | A | ALA | 158 | H | -12.268971 | 17.492734 | -13.870456 | -4.887023 |
| 1KAO | A | GLU | 159 | H | -12.448237 | 18.226803 | -13.543496 | -4.892887 |
| 1KAO | A | ILE | 160 | H | -12.515498 | 18.354682 | -13.327412 | -4.845601 |
| 1KAO | A | VAL | 161 | H | -12.550884 | 17.869676 | -13.844528 | -5.057544 |
| 1KAO | A | ARG | 162 | H | -12.474289 | 13.287867 | -18.033730 | -6.548518 |
| 1KAO | A | GLN | 163 | H | -8.338146  | 11.217603 | -11.768955 | -5.382652 |
| 1KAO | A | MET | 164 | H | -5.765551  | 8.264495  | -8.350298  | -4.057496 |
| 1KAO | A | ASN | 165 | H | -5.765551  | 8.264495  | -8.350298  | -4.057496 |
| 1KAO | A | TYR | 166 | H | -5.765551  | 8.264495  | -8.350298  | -4.057496 |
| 1KAO | A | ALA | 167 | C | -5.765551  | 8.264495  | -8.350298  | -4.057496 |
| 1KCQ | A | VAL | 158 | C | -8.351816  | 8.719827  | -11.030197 | -3.745668 |
| 1KCQ | A | VAL | 159 | C | -8.351816  | 8.719827  | -11.030197 | -3.745668 |
| 1KCQ | A | GLN | 160 | E | -8.351816  | 8.719827  | -11.030197 | -3.745668 |
| 1KCQ | A | ARG | 161 | E | -8.351816  | 8.719827  | -11.030197 | -3.745668 |
| 1KCQ | A | LEU | 162 | E | -11.069250 | 13.061978 | -13.298235 | -4.595169 |
| 1KCQ | A | PHE | 163 | E | -13.830133 | 16.807482 | -16.943812 | -5.784906 |
| 1KCQ | A | GLN | 164 | E | -13.732785 | 14.821288 | -17.905822 | -5.772662 |
| 1KCQ | A | VAL | 165 | E | -13.385162 | 13.398801 | -18.637248 | -5.812885 |
| 1KCQ | A | LYS | 166 | T | -12.447962 | 9.640662  | -20.554727 | -6.681293 |
| 1KCQ | A | GLY | 167 | T | -9.541509  | 9.218747  | -13.833525 | -4.862012 |
| 1KCQ | A | ARG | 168 | T | -9.357521  | 9.157354  | -13.700729 | -4.607126 |
| 1KCQ | A | ARG | 169 | T | -8.373505  | 9.203079  | -11.250561 | -3.764787 |
| 1KCQ | A | VAL | 170 | T | -6.498227  | 9.636875  | -7.681819  | -3.295111 |
| 1KCQ | A | VAL | 171 | E | -6.349975  | 10.213880 | -7.740922  | -3.436774 |
| 1KCQ | A | ARG | 172 | E | -6.283259  | 10.283514 | -7.876578  | -3.489781 |
| 1KCQ | A | ALA | 173 | E | -5.958284  | 9.985161  | -8.302183  | -3.860262 |
| 1KCQ | A | THR | 174 | E | -5.606871  | 9.691570  | -8.404999  | -4.110332 |
| 1KCQ | A | GLU | 175 | E | -5.691012  | 9.709551  | -8.756001  | -4.357754 |
| 1KCQ | A | VAL | 176 | C | -5.735160  | 9.516337  | -8.821293  | -4.391164 |
| 1KCQ | A | PRO | 177 | C | -5.756161  | 9.494278  | -8.812653  | -4.411323 |
| 1KCQ | A | VAL | 178 | C | -5.967409  | 9.465469  | -8.780851  | -4.431115 |
| 1KCQ | A | SER | 179 | G | -7.038361  | 10.181995 | -9.872243  | -4.566415 |
| 1KCQ | A | TRP | 180 | G | -8.405200  | 13.705402 | -9.948101  | -4.546325 |
| 1KCQ | A | GLU | 181 | G | -8.466073  | 13.579788 | -9.863184  | -4.536023 |
| 1KCQ | A | SER | 182 | C | -9.859795  | 14.962814 | -11.503447 | -4.941383 |
| 1KCQ | A | PHE | 183 | T | -11.120493 | 17.879604 | -12.298366 | -5.435166 |
| 1KCQ | A | ASN | 184 | T | -12.243556 | 16.899635 | -15.440918 | -6.059365 |
| 1KCQ | A | ASN | 185 | T | -12.813346 | 13.162436 | -18.335055 | -6.155771 |
| 1KCQ | A | GLY | 186 | T | -12.937985 | 13.150018 | -18.377961 | -5.983074 |
| 1KCQ | A | ASP | 187 | E | -12.919892 | 13.577642 | -18.045760 | -5.902170 |
| 1KCQ | A | CYS | 188 | E | -12.826470 | 14.447320 | -17.405295 | -5.774420 |
| 1KCQ | A | PHE | 189 | E | -12.928288 | 16.674400 | -15.953480 | -5.498301 |
| 1KCQ | A | ILE | 190 | E | -12.267185 | 16.350793 | -14.557686 | -5.143455 |
| 1KCQ | A | LEU | 191 | E | -11.384790 | 13.420633 | -14.777018 | -5.218589 |
| 1KCQ | A | ASP | 192 | E | -9.480075  | 9.551371  | -14.343648 | -5.450375 |
| 1KCQ | A | LEU | 193 | T | -7.985225  | 11.065122 | -11.143163 | -5.029125 |
| 1KCQ | A | GLY | 194 | T | -7.975875  | 11.082406 | -11.188956 | -5.036146 |
| 1KCQ | A | ASN | 195 | E | -7.976131  | 11.080159 | -11.187956 | -5.036230 |
| 1KCQ | A | ASN | 196 | E | -7.977660  | 11.076027 | -11.178313 | -5.035654 |
| 1KCQ | A | ILE | 197 | E | -8.024520  | 11.214579 | -10.919249 | -5.000724 |
| 1KCQ | A | HIS | 198 | E | -10.435508 | 12.193847 | -14.081825 | -5.479360 |
| 1KCQ | A | GLN | 199 | E | -13.692814 | 14.792030 | -17.891326 | -6.136019 |
| 1KCQ | A | TRP | 200 | E | -11.933989 | 11.487875 | -16.917336 | -5.888516 |
| 1KCQ | A | CYS | 201 | T | -10.041615 | 7.231355  | -16.698707 | -5.775503 |
| 1KCQ | A | GLY | 202 | T | -10.040181 | 7.238951  | -16.717863 | -5.784516 |

|      |   |     |     |   |            |           |            |           |
|------|---|-----|-----|---|------------|-----------|------------|-----------|
| 1KCQ | A | SER | 203 | T | -9.925217  | 7.231742  | -16.805080 | -5.710563 |
| 1KCQ | A | ASN | 204 | T | -9.880175  | 7.447334  | -16.796725 | -5.709905 |
| 1KCQ | A | SER | 205 | C | -9.897113  | 7.329398  | -16.799563 | -5.704835 |
| 1KCQ | A | ASN | 206 | H | -10.721032 | 8.180819  | -17.136971 | -5.506065 |
| 1KCQ | A | ARG | 207 | H | -10.708876 | 8.237234  | -17.084742 | -5.462096 |
| 1KCQ | A | TYR | 208 | H | -11.346878 | 10.298934 | -16.849049 | -5.653673 |
| 1KCQ | A | GLU | 209 | H | -12.501666 | 11.252790 | -17.925990 | -5.340182 |
| 1KCQ | A | ARG | 210 | H | -11.727673 | 11.696807 | -15.988687 | -5.080047 |
| 1KCQ | A | LEU | 211 | H | -8.989005  | 10.557268 | -12.073092 | -4.663994 |
| 1KCQ | A | LYS | 212 | H | -8.989460  | 10.563140 | -12.070170 | -4.666419 |
| 1KCQ | A | ALA | 213 | H | -8.936486  | 10.660420 | -12.182832 | -4.678226 |
| 1KCQ | A | THR | 214 | H | -8.892244  | 10.676813 | -12.333806 | -4.709302 |
| 1KCQ | A | GLN | 215 | H | -8.854543  | 10.673854 | -12.479714 | -4.755551 |
| 1KCQ | A | VAL | 216 | H | -9.688236  | 11.407807 | -14.132062 | -5.147660 |
| 1KCQ | A | SER | 217 | H | -9.688743  | 11.393104 | -14.126405 | -5.140217 |
| 1KCQ | A | LYS | 218 | H | -9.872703  | 11.285626 | -14.514114 | -5.293549 |
| 1KCQ | A | GLY | 219 | H | -9.713066  | 10.577238 | -14.551064 | -5.254139 |
| 1KCQ | A | ILE | 220 | H | -9.791463  | 10.525072 | -14.599120 | -5.218012 |
| 1KCQ | A | ARG | 221 | H | -9.892945  | 10.032865 | -14.745241 | -5.195480 |
| 1KCQ | A | ASP | 222 | H | -9.433007  | 8.591752  | -15.226061 | -5.284906 |
| 1KCQ | A | ASN | 223 | H | -8.402223  | 7.656760  | -14.092328 | -5.312618 |
| 1KCQ | A | GLU | 224 | H | -8.432238  | 7.511503  | -14.102837 | -5.320434 |
| 1KCQ | A | ARG | 225 | T | -8.432865  | 7.421972  | -14.123882 | -5.301773 |
| 1KCQ | A | SER | 226 | T | -8.430042  | 7.404656  | -14.140877 | -5.295451 |
| 1KCQ | A | GLY | 227 | T | -8.492147  | 7.407944  | -13.975406 | -5.288173 |
| 1KCQ | A | ARG | 228 | C | -10.470759 | 5.438466  | -17.103855 | -4.447195 |
| 1KCQ | A | ALA | 229 | E | -10.003299 | 8.606649  | -14.767702 | -4.499315 |
| 1KCQ | A | ARG | 230 | E | -10.132250 | 9.566150  | -14.360918 | -4.590834 |
| 1KCQ | A | VAL | 231 | E | -9.114583  | 11.077330 | -12.913889 | -5.151187 |
| 1KCQ | A | HIS | 232 | E | -9.105204  | 11.065215 | -12.977499 | -5.161901 |
| 1KCQ | A | VAL | 233 | E | -8.703786  | 9.523710  | -13.947946 | -5.442802 |
| 1KCQ | A | SER | 234 | E | -8.340938  | 8.138953  | -14.462184 | -5.580870 |
| 1KCQ | A | GLU | 235 | T | -7.387901  | 7.767604  | -13.635236 | -5.958546 |
| 1KCQ | A | GLU | 236 | T | -7.332604  | 7.783323  | -13.714930 | -5.989227 |
| 1KCQ | A | GLY | 237 | T | -6.171083  | 8.446566  | -10.778004 | -5.349736 |
| 1KCQ | A | THR | 238 | T | -6.079839  | 8.758214  | -10.658470 | -5.292254 |
| 1KCQ | A | GLU | 239 | C | -6.085557  | 8.786998  | -10.613557 | -5.288561 |
| 1KCQ | A | PRO | 240 | H | -6.136040  | 8.931632  | -10.343354 | -5.211730 |
| 1KCQ | A | GLU | 241 | H | -6.137632  | 8.973339  | -10.291308 | -5.192305 |
| 1KCQ | A | ALA | 242 | H | -7.125258  | 10.798271 | -10.274957 | -4.965093 |
| 1KCQ | A | MET | 243 | H | -8.308811  | 12.709801 | -11.170672 | -4.885695 |
| 1KCQ | A | LEU | 244 | H | -7.561123  | 12.786121 | -9.521653  | -4.567132 |
| 1KCQ | A | GLN | 245 | H | -6.667923  | 10.478278 | -9.037849  | -4.268785 |
| 1KCQ | A | VAL | 246 | H | -6.634324  | 10.615774 | -9.064818  | -4.307733 |
| 1KCQ | A | LEU | 247 | C | -6.577438  | 10.721489 | -9.183080  | -4.359644 |
| 1KCQ | A | GLY | 248 | C | -5.330140  | 7.785468  | -8.924385  | -4.505071 |
| 1KCQ | A | PRO | 249 | C | -5.016799  | 9.123151  | -8.115637  | -4.481128 |
| 1KCQ | A | LYS | 250 | C | -5.017823  | 9.163687  | -8.114620  | -4.496922 |
| 1KCQ | A | PRO | 251 | C | -4.935466  | 9.046948  | -8.154442  | -4.404815 |
| 1KCQ | A | ALA | 252 | C | -4.641297  | 8.694286  | -7.997622  | -4.296625 |
| 1KCQ | A | LEU | 253 | C | -4.826714  | 9.204286  | -7.706245  | -4.233755 |
| 1KCQ | A | PRO | 254 | C | -4.815892  | 7.893935  | -9.088479  | -4.781689 |
| 1KCQ | A | ALA | 255 | C | -4.139247  | 6.425955  | -9.510890  | -5.320861 |
| 1KCQ | A | GLY | 256 | C | -3.564225  | 5.756652  | -8.848849  | -5.094801 |
| 1KCQ | A | THR | 257 | C | -3.564225  | 5.756652  | -8.848849  | -5.094801 |
| 1KCQ | A | GLU | 258 | C | -3.564225  | 5.756652  | -8.848849  | -5.094801 |
| 1KCQ | A | ASP | 259 | C | -3.564225  | 5.756652  | -8.848849  | -5.094801 |
| 1KEX | A | PHE | 1   | T | -4.537036  | 1.895251  | -8.466935  | -3.072229 |
| 1KEX | A | LYS | 2   | T | -4.537036  | 1.895251  | -8.466935  | -3.072229 |
| 1KEX | A | CYS | 3   | T | -4.537036  | 1.895251  | -8.466935  | -3.072229 |
| 1KEX | A | MET | 4   | T | -4.537036  | 1.895251  | -8.466935  | -3.072229 |
| 1KEX | A | GLU | 5   | E | -6.966413  | 4.298760  | -13.354154 | -4.869526 |
| 1KEX | A | ALA | 6   | E | -7.698319  | 6.330438  | -13.793981 | -5.384341 |
| 1KEX | A | LEU | 7   | C | -8.755523  | 10.663661 | -13.145517 | -5.244055 |
| 1KEX | A | GLY | 8   | T | -8.007237  | 7.193484  | -13.220957 | -5.007973 |
| 1KEX | A | MET | 9   | T | -7.776753  | 6.845894  | -13.225438 | -4.931273 |
| 1KEX | A | GLU | 10  | T | -7.502241  | 6.389849  | -12.797105 | -4.644321 |
| 1KEX | A | SER | 11  | T | -7.193934  | 6.188083  | -12.518379 | -4.522334 |
| 1KEX | A | GLY | 12  | T | -7.189590  | 6.165049  | -12.543792 | -4.522175 |
| 1KEX | A | GLU | 13  | T | -7.309561  | 6.201964  | -12.375479 | -4.415053 |
| 1KEX | A | ILE | 14  | T | -7.407011  | 6.187069  | -12.198699 | -4.330857 |
| 1KEX | A | HIS | 15  | T | -7.649711  | 6.203057  | -12.336255 | -4.392697 |
| 1KEX | A | SER | 16  | G | -9.041211  | 7.131586  | -14.478175 | -4.603389 |
| 1KEX | A | ASP | 17  | G | -9.218341  | 7.541204  | -14.191498 | -4.469113 |
| 1KEX | A | GLN | 18  | G | -9.378417  | 8.091070  | -13.905045 | -4.500613 |
| 1KEX | A | ILE | 19  | E | -9.335976  | 8.284756  | -13.681682 | -4.394191 |
| 1KEX | A | THR | 20  | E | -9.760278  | 8.495008  | -14.221477 | -4.213742 |
| 1KEX | A | ALA | 21  | E | -9.681961  | 8.787682  | -14.115944 | -4.293889 |
| 1KEX | A | SER | 22  | C | -9.786251  | 8.509776  | -14.245569 | -4.292380 |
| 1KEX | A | SER | 23  | C | -9.311350  | 7.480141  | -14.030748 | -4.209539 |
| 1KEX | A | GLN | 24  | C | -7.766370  | 7.061803  | -11.946604 | -4.538651 |

|      |   |     |     |   |            |           |            |           |
|------|---|-----|-----|---|------------|-----------|------------|-----------|
| 1KEX | A | TYR | 25  | C | -7.738143  | 7.202842  | -11.961969 | -4.550710 |
| 1KEX | A | SER | 26  | T | -7.741755  | 7.186701  | -11.951622 | -4.550516 |
| 1KEX | A | THR | 27  | T | -7.742188  | 7.187005  | -11.947790 | -4.550328 |
| 1KEX | A | ASN | 28  | T | -7.765853  | 7.208631  | -11.869842 | -4.567001 |
| 1KEX | A | TRP | 29  | T | -9.387046  | 9.539271  | -12.942471 | -4.732539 |
| 1KEX | A | SER | 30  | T | -11.109883 | 9.712643  | -16.281943 | -5.387665 |
| 1KEX | A | ALA | 31  | G | -12.311051 | 11.092158 | -17.247992 | -5.411779 |
| 1KEX | A | GLU | 32  | G | -13.293962 | 11.795490 | -18.117291 | -5.413679 |
| 1KEX | A | ARG | 33  | G | -13.801767 | 10.727999 | -18.608990 | -5.130755 |
| 1KEX | A | SER | 34  | C | -13.849119 | 10.442871 | -18.634268 | -5.115355 |
| 1KEX | A | ARG | 35  | B | -14.613837 | 12.671938 | -18.838561 | -5.264861 |
| 1KEX | A | LEU | 36  | T | -10.341303 | 11.752207 | -13.928467 | -5.439422 |
| 1KEX | A | ASN | 37  | T | -10.179484 | 11.087818 | -14.654303 | -5.563693 |
| 1KEX | A | TYR | 38  | T | -9.412812  | 9.843236  | -14.079733 | -5.377603 |
| 1KEX | A | PRO | 39  | C | -9.396368  | 9.896898  | -14.101742 | -5.372105 |
| 1KEX | A | GLU | 40  | C | -9.392458  | 9.919490  | -14.111199 | -5.373095 |
| 1KEX | A | ASN | 41  | C | -9.522867  | 9.480754  | -14.162644 | -5.354785 |
| 1KEX | A | GLY | 42  | C | -9.413216  | 10.266265 | -13.553445 | -5.150005 |
| 1KEX | A | TRP | 43  | B | -9.731675  | 12.027710 | -12.320262 | -4.444541 |
| 1KEX | A | THR | 44  | C | -7.089393  | 7.360722  | -10.132159 | -4.067266 |
| 1KEX | A | PRO | 45  | T | -6.877636  | 7.166754  | -10.471769 | -4.112854 |
| 1KEX | A | GLY | 46  | T | -6.875066  | 7.171215  | -10.491506 | -4.117249 |
| 1KEX | A | GLU | 47  | T | -6.874109  | 7.156538  | -10.502951 | -4.116185 |
| 1KEX | A | ASP | 48  | T | -6.875570  | 7.142326  | -10.503104 | -4.116548 |
| 1KEX | A | SER | 49  | T | -7.568029  | 6.775899  | -11.378705 | -4.234634 |
| 1KEX | A | TYR | 50  | T | -9.531674  | 8.405780  | -14.455163 | -4.648596 |
| 1KEX | A | ARG | 51  | T | -9.822294  | 8.494177  | -14.091008 | -4.346143 |
| 1KEX | A | GLU | 52  | T | -10.539147 | 10.087283 | -14.089334 | -4.565514 |
| 1KEX | A | TRP | 53  | C | -11.793764 | 13.957080 | -14.614975 | -5.103121 |
| 1KEX | A | ILE | 54  | E | -12.254368 | 15.443857 | -14.319718 | -5.177127 |
| 1KEX | A | GLN | 55  | E | -12.497947 | 12.638038 | -16.050649 | -5.024114 |
| 1KEX | A | VAL | 56  | E | -10.278048 | 10.871770 | -13.521288 | -4.764793 |
| 1KEX | A | ASP | 57  | E | -8.764884  | 10.608638 | -12.305956 | -5.108400 |
| 1KEX | A | LEU | 58  | E | -7.816970  | 11.199154 | -9.956942  | -4.442880 |
| 1KEX | A | GLY | 59  | E | -7.806499  | 11.224541 | -9.988842  | -4.442916 |
| 1KEX | A | LEU | 60  | E | -7.806374  | 11.226376 | -9.988349  | -4.442510 |
| 1KEX | A | LEU | 61  | E | -7.815350  | 11.232723 | -9.935268  | -4.437651 |
| 1KEX | A | ARG | 62  | E | -7.937043  | 11.380344 | -9.418153  | -4.278077 |
| 1KEX | A | PHE | 63  | E | -10.142230 | 12.978558 | -11.732638 | -4.363246 |
| 1KEX | A | VAL | 64  | E | -9.382334  | 12.578811 | -9.341096  | -3.250143 |
| 1KEX | A | THR | 65  | E | -9.188907  | 12.316489 | -9.827308  | -3.399689 |
| 1KEX | A | ALA | 66  | E | -9.185249  | 12.307410 | -9.863488  | -3.408155 |
| 1KEX | A | VAL | 67  | E | -9.176031  | 12.269226 | -9.961873  | -3.435630 |
| 1KEX | A | GLY | 68  | E | -9.169845  | 12.132330 | -10.097249 | -3.470763 |
| 1KEX | A | THR | 69  | E | -9.826479  | 11.350338 | -11.932660 | -3.984768 |
| 1KEX | A | GLN | 70  | E | -10.793505 | 9.598819  | -16.008617 | -4.923578 |
| 1KEX | A | GLY | 71  | C | -10.346649 | 9.199450  | -15.455213 | -4.853025 |
| 1KEX | A | ALA | 72  | E | -10.367082 | 9.178538  | -15.498951 | -4.865392 |
| 1KEX | A | ILE | 73  | E | -9.937705  | 8.576799  | -15.134044 | -4.945847 |
| 1KEX | A | SER | 74  | T | -8.720846  | 5.581885  | -14.445951 | -4.800271 |
| 1KEX | A | LYS | 75  | T | -7.577683  | 4.846548  | -13.280951 | -4.747103 |
| 1KEX | A | GLU | 76  | T | -6.461744  | 6.617904  | -11.377494 | -4.974238 |
| 1KEX | A | THR | 77  | T | -6.396882  | 7.116588  | -11.271373 | -4.989772 |
| 1KEX | A | LYS | 78  | T | -6.397725  | 7.116040  | -11.265882 | -4.989766 |
| 1KEX | A | LYS | 79  | C | -6.408094  | 7.150793  | -11.211337 | -4.993491 |
| 1KEX | A | LYS | 80  | E | -6.483032  | 7.477868  | -10.958642 | -5.027905 |
| 1KEX | A | TYR | 81  | E | -7.738317  | 11.432574 | -10.363347 | -5.124227 |
| 1KEX | A | TYR | 82  | E | -11.691635 | 17.056723 | -12.833177 | -5.156131 |
| 1KEX | A | VAL | 83  | E | -12.487636 | 18.940959 | -12.536767 | -4.977488 |
| 1KEX | A | LYS | 84  | E | -13.350379 | 19.359311 | -14.328795 | -5.283139 |
| 1KEX | A | THR | 85  | E | -13.447558 | 18.560094 | -15.057215 | -5.387485 |
| 1KEX | A | TYR | 86  | E | -13.079202 | 19.260885 | -14.184166 | -5.307483 |
| 1KEX | A | LYS | 87  | E | -12.138304 | 16.887447 | -14.136528 | -5.410275 |
| 1KEX | A | ILE | 88  | E | -11.920182 | 15.539578 | -14.296013 | -5.052266 |
| 1KEX | A | ASP | 89  | E | -11.713115 | 13.707933 | -15.350819 | -5.164330 |
| 1KEX | A | VAL | 90  | E | -9.794614  | 8.552950  | -14.021660 | -4.656590 |
| 1KEX | A | SER | 91  | E | -8.053619  | 5.738905  | -13.578019 | -4.871355 |
| 1KEX | A | SER | 92  | T | -5.388466  | 4.315437  | -10.615370 | -4.728312 |
| 1KEX | A | ASN | 93  | T | -5.133296  | 5.287140  | -10.314562 | -4.834708 |
| 1KEX | A | GLY | 94  | T | -5.095870  | 5.363765  | -10.322078 | -4.804731 |
| 1KEX | A | GLU | 95  | T | -5.090724  | 5.399765  | -10.322563 | -4.801614 |
| 1KEX | A | ASP | 96  | T | -5.094400  | 5.400583  | -10.302465 | -4.801471 |
| 1KEX | A | TRP | 97  | E | -5.633976  | 7.165665  | -9.874813  | -4.922824 |
| 1KEX | A | ILE | 98  | E | -5.876256  | 12.247405 | -9.428413  | -6.195355 |
| 1KEX | A | THR | 99  | E | -5.653533  | 14.458580 | -8.894634  | -6.735061 |
| 1KEX | A | ILE | 100 | C | -4.367629  | 9.027380  | -6.255619  | -4.211441 |
| 1KEX | A | LYS | 101 | E | -1.538404  | 5.005931  | -4.346291  | -4.036516 |
| 1KEX | A | GLU | 102 | E | -1.032807  | 5.441344  | -4.577333  | -4.334716 |
| 1KEX | A | GLY | 103 | T | -1.025440  | 5.462722  | -4.610213  | -4.338330 |
| 1KEX | A | ASN | 104 | T | -1.025056  | 5.465397  | -4.612303  | -4.338456 |
| 1KEX | A | LYS | 105 | E | -1.027643  | 5.445750  | -4.600519  | -4.334745 |

|      |   |     |     |   |            |           |            |           |
|------|---|-----|-----|---|------------|-----------|------------|-----------|
| 1KEX | A | PRO | 106 | E | -1.436790  | 5.047536  | -4.151163  | -3.947915 |
| 1KEX | A | VAL | 107 | C | -3.764894  | 6.030776  | -6.023123  | -3.470003 |
| 1KEX | A | LEU | 108 | C | -5.360127  | 10.057588 | -7.113325  | -4.253938 |
| 1KEX | A | PHE | 109 | E | -8.091467  | 15.443567 | -10.436716 | -5.641212 |
| 1KEX | A | GLN | 110 | E | -8.532634  | 14.109074 | -11.440162 | -5.530948 |
| 1KEX | A | GLY | 111 | C | -8.662737  | 11.558253 | -12.224900 | -5.058713 |
| 1KEX | A | ASN | 112 | C | -9.027683  | 7.946674  | -14.003636 | -4.668048 |
| 1KEX | A | THR | 113 | C | -6.863193  | 6.320698  | -10.091289 | -3.782171 |
| 1KEX | A | ASN | 114 | T | -6.737633  | 6.582145  | -10.143043 | -3.785077 |
| 1KEX | A | PRO | 115 | T | -6.732488  | 6.600374  | -10.148939 | -3.779458 |
| 1KEX | A | THR | 116 | T | -6.618258  | 6.742257  | -10.144838 | -3.736961 |
| 1KEX | A | ASP | 117 | T | -6.613328  | 6.748391  | -10.147870 | -3.726981 |
| 1KEX | A | VAL | 118 | C | -6.614418  | 7.863515  | -8.389019  | -2.816175 |
| 1KEX | A | VAL | 119 | E | -6.706824  | 7.953351  | -8.030639  | -2.636231 |
| 1KEX | A | VAL | 120 | E | -6.703939  | 8.050358  | -7.981863  | -2.630228 |
| 1KEX | A | ALA | 121 | E | -6.811813  | 8.559239  | -7.454321  | -2.484000 |
| 1KEX | A | VAL | 122 | E | -5.790560  | 12.016514 | -6.244386  | -3.707542 |
| 1KEX | A | PHE | 123 | E | -5.870070  | 12.783382 | -6.088338  | -3.937848 |
| 1KEX | A | PRO | 124 | E | -5.227130  | 11.155155 | -5.290134  | -3.231711 |
| 1KEX | A | LYS | 125 | E | -5.068875  | 10.978460 | -5.447676  | -3.244578 |
| 1KEX | A | PRO | 126 | E | -5.070186  | 10.971461 | -5.439273  | -3.241578 |
| 1KEX | A | LEU | 127 | E | -5.236384  | 10.395516 | -5.255741  | -3.005266 |
| 1KEX | A | ILE | 128 | E | -5.244193  | 10.359604 | -5.234373  | -3.002764 |
| 1KEX | A | THR | 129 | E | -5.924059  | 10.428626 | -5.978370  | -3.286048 |
| 1KEX | A | ARG | 130 | E | -9.287537  | 14.472646 | -9.259084  | -3.956766 |
| 1KEX | A | PHE | 131 | E | -12.189967 | 17.735193 | -12.012330 | -4.125575 |
| 1KEX | A | VAL | 132 | E | -12.385543 | 18.236975 | -11.849535 | -4.074834 |
| 1KEX | A | ARG | 133 | E | -12.373679 | 17.610092 | -12.622977 | -4.436302 |
| 1KEX | A | ILE | 134 | E | -10.454022 | 14.700442 | -10.599349 | -3.991576 |
| 1KEX | A | LYS | 135 | E | -10.151143 | 14.926473 | -10.693516 | -4.106590 |
| 1KEX | A | PRO | 136 | E | -9.820401  | 14.549093 | -10.916857 | -4.188515 |
| 1KEX | A | ALA | 137 | E | -8.093554  | 12.200839 | -9.924573  | -4.594950 |
| 1KEX | A | THR | 138 | E | -7.538957  | 11.052175 | -10.054986 | -4.580544 |
| 1KEX | A | TRP | 139 | E | -7.328521  | 11.635179 | -9.638595  | -4.517582 |
| 1KEX | A | GLU | 140 | E | -7.156500  | 11.303905 | -9.749100  | -4.493520 |
| 1KEX | A | THR | 141 | T | -7.148559  | 11.341805 | -9.766897  | -4.504414 |
| 1KEX | A | GLY | 142 | T | -7.274832  | 11.169410 | -9.742861  | -4.477371 |
| 1KEX | A | ILE | 143 | C | -7.567042  | 11.715246 | -9.489731  | -4.417561 |
| 1KEX | A | SER | 144 | C | -7.926103  | 10.621650 | -10.154238 | -4.462596 |
| 1KEX | A | MET | 145 | B | -9.527682  | 14.125180 | -11.123329 | -5.047160 |
| 1KEX | A | ARG | 146 | E | -14.104608 | 14.741609 | -17.395377 | -5.452395 |
| 1KEX | A | PHE | 147 | E | -13.644212 | 19.203332 | -13.784268 | -4.992653 |
| 1KEX | A | GLU | 148 | E | -13.625713 | 19.198607 | -13.963073 | -5.088615 |
| 1KEX | A | VAL | 149 | E | -12.147056 | 16.466131 | -14.309672 | -5.823988 |
| 1KEX | A | TYR | 150 | E | -10.027856 | 12.730724 | -12.766274 | -5.322848 |
| 1KEX | A | GLY | 151 | E | -5.725016  | 7.231385  | -9.095637  | -4.453236 |
| 1KEX | A | CYS | 152 | E | -4.675078  | 6.535806  | -7.444556  | -3.657358 |
| 1KEX | A | LYS | 153 | C | -4.675078  | 6.535806  | -7.444556  | -3.657358 |
| 1KEX | A | ILE | 154 | C | -4.675078  | 6.535806  | -7.444556  | -3.657358 |
| 1KEX | A | THR | 155 | C | -4.675078  | 6.535806  | -7.444556  | -3.657358 |
| 1KPF | A | ASP | 16  | C | -8.758497  | 9.502619  | -10.460143 | -3.145907 |
| 1KPF | A | THR | 17  | C | -8.758497  | 9.502619  | -10.460143 | -3.145907 |
| 1KPF | A | ILE | 18  | H | -8.758497  | 9.502619  | -10.460143 | -3.145907 |
| 1KPF | A | PHE | 19  | H | -8.758497  | 9.502619  | -10.460143 | -3.145907 |
| 1KPF | A | GLY | 20  | H | -9.102177  | 11.930791 | -13.186227 | -5.619116 |
| 1KPF | A | LYS | 21  | H | -8.680229  | 11.598539 | -12.796748 | -5.841885 |
| 1KPF | A | ILE | 22  | H | -6.571280  | 10.157569 | -8.247633  | -3.874576 |
| 1KPF | A | ILE | 23  | H | -5.645723  | 9.922769  | -7.889331  | -4.188771 |
| 1KPF | A | ARG | 24  | H | -4.913960  | 5.220061  | -6.981855  | -2.592628 |
| 1KPF | A | LYS | 25  | T | -3.532773  | 4.527865  | -4.199015  | -1.920577 |
| 1KPF | A | GLU | 26  | T | -2.919618  | 4.593208  | -3.608368  | -1.856458 |
| 1KPF | A | ILE | 27  | T | -2.515769  | 5.444697  | -3.090235  | -1.891809 |
| 1KPF | A | PRO | 28  | T | -2.324558  | 6.278883  | -3.182872  | -2.242026 |
| 1KPF | A | ALA | 29  | C | -2.329775  | 6.306541  | -3.150937  | -2.243945 |
| 1KPF | A | LYS | 30  | C | -2.407069  | 6.536104  | -3.033809  | -2.288809 |
| 1KPF | A | ILE | 31  | E | -2.599107  | 7.206846  | -2.918952  | -2.448426 |
| 1KPF | A | ILE | 32  | E | -3.096321  | 8.336165  | -3.395648  | -3.118344 |
| 1KPF | A | PHE | 33  | E | -6.544413  | 9.654289  | -6.248418  | -2.311737 |
| 1KPF | A | GLU | 34  | E | -7.176762  | 10.242188 | -7.610316  | -3.087961 |
| 1KPF | A | ASP | 35  | E | -8.944262  | 8.062152  | -13.244367 | -4.096789 |
| 1KPF | A | ASP | 36  | T | -9.069595  | 7.521712  | -13.704301 | -4.204952 |
| 1KPF | A | ARG | 37  | T | -9.323619  | 6.812403  | -13.893093 | -4.102781 |
| 1KPF | A | CYS | 38  | E | -9.493845  | 6.036908  | -13.507160 | -3.673640 |
| 1KPF | A | LEU | 39  | E | -10.508774 | 9.226646  | -12.743828 | -3.256823 |
| 1KPF | A | ALA | 40  | E | -9.898457  | 10.016234 | -10.226485 | -2.415138 |
| 1KPF | A | PHE | 41  | E | -8.874502  | 8.576301  | -9.632204  | -2.380638 |
| 1KPF | A | HIS | 42  | E | -6.094236  | 3.759138  | -8.751738  | -2.504918 |
| 1KPF | A | ASP | 43  | T | -5.475497  | 3.345863  | -9.655526  | -3.217508 |
| 1KPF | A | ILE | 44  | T | -5.396712  | 3.140894  | -9.550729  | -3.001768 |
| 1KPF | A | SER | 45  | T | -5.385939  | 3.151107  | -9.550092  | -2.979820 |
| 1KPF | A | PRO | 46  | T | -5.376581  | 3.191501  | -9.538929  | -2.967349 |

|      |   |     |     |   |            |           |            |           |
|------|---|-----|-----|---|------------|-----------|------------|-----------|
| 1KPF | A | GLN | 47  | T | -5.583493  | 2.975510  | -9.872769  | -3.160553 |
| 1KPF | A | ALA | 48  | T | -6.473416  | 2.483122  | -8.919584  | -1.612365 |
| 1KPF | A | PRO | 49  | T | -7.334467  | 5.054520  | -9.272237  | -2.032542 |
| 1KPF | A | THR | 50  | E | -7.737877  | 6.234758  | -9.029902  | -2.265302 |
| 1KPF | A | HIS | 51  | E | -9.779761  | 11.428327 | -11.971031 | -3.924151 |
| 1KPF | A | PHE | 52  | E | -10.356491 | 15.349838 | -10.746604 | -4.324266 |
| 1KPF | A | LEU | 53  | E | -11.635034 | 17.478203 | -10.826297 | -3.632872 |
| 1KPF | A | VAL | 54  | E | -11.644562 | 17.131098 | -10.983965 | -3.605385 |
| 1KPF | A | ILE | 55  | E | -10.958583 | 13.629723 | -11.301682 | -3.341145 |
| 1KPF | A | PRO | 56  | E | -10.485460 | 12.247006 | -11.355437 | -3.222921 |
| 1KPF | A | LYS | 57  | C | -10.141222 | 11.134474 | -12.184468 | -3.558659 |
| 1KPF | A | LYS | 58  | C | -10.066392 | 10.985354 | -12.598043 | -3.793314 |
| 1KPF | A | HIS | 59  | C | -10.038338 | 11.041374 | -12.552810 | -3.763223 |
| 1KPF | A | ILE | 60  | C | -10.120896 | 10.888403 | -12.752347 | -3.844227 |
| 1KPF | A | SER | 61  | C | -9.843766  | 8.493319  | -12.858350 | -3.390864 |
| 1KPF | A | GLN | 62  | C | -8.286262  | 8.180813  | -10.392029 | -3.292893 |
| 1KPF | A | ILE | 63  | G | -6.276058  | 7.853561  | -8.817411  | -3.872820 |
| 1KPF | A | SER | 64  | G | -6.107016  | 6.655106  | -9.034140  | -3.509289 |
| 1KPF | A | VAL | 65  | G | -5.338433  | 3.429921  | -8.391829  | -2.623221 |
| 1KPF | A | ALA | 66  | C | -5.293566  | 3.394274  | -8.516992  | -2.633941 |
| 1KPF | A | GLU | 67  | C | -5.216761  | 3.246447  | -8.839985  | -2.740909 |
| 1KPF | A | ASP | 68  | G | -5.302184  | 2.417582  | -8.977561  | -2.578585 |
| 1KPF | A | ASP | 69  | G | -5.341238  | 2.376148  | -8.929104  | -2.590197 |
| 1KPF | A | ASP | 70  | G | -6.117329  | 2.807527  | -11.036362 | -3.402596 |
| 1KPF | A | GLU | 71  | H | -6.323123  | 2.750669  | -11.420469 | -3.665559 |
| 1KPF | A | SER | 72  | H | -7.342429  | 4.222608  | -12.738740 | -4.406241 |
| 1KPF | A | LEU | 73  | H | -10.325935 | 9.305396  | -13.302892 | -3.455306 |
| 1KPF | A | LEU | 74  | H | -10.438531 | 10.372728 | -12.789860 | -3.451233 |
| 1KPF | A | GLY | 75  | H | -10.104414 | 9.431534  | -12.291126 | -3.071653 |
| 1KPF | A | HIS | 76  | H | -10.353051 | 9.772653  | -12.210697 | -3.064226 |
| 1KPF | A | LEU | 77  | H | -10.000330 | 10.415411 | -11.625686 | -3.031277 |
| 1KPF | A | MET | 78  | H | -9.134190  | 9.511831  | -12.164489 | -3.998845 |
| 1KPF | A | ILE | 79  | H | -8.242033  | 6.577234  | -10.362219 | -2.588449 |
| 1KPF | A | VAL | 80  | H | -8.200854  | 6.688170  | -10.407377 | -2.619449 |
| 1KPF | A | GLY | 81  | H | -8.171564  | 6.722573  | -10.488779 | -2.640062 |
| 1KPF | A | LYS | 82  | H | -8.157267  | 6.684909  | -10.607356 | -2.681900 |
| 1KPF | A | LYS | 83  | H | -7.747046  | 7.416641  | -11.568672 | -3.845686 |
| 1KPF | A | CYS | 84  | H | -7.545205  | 8.205613  | -12.382692 | -4.973657 |
| 1KPF | A | ALA | 85  | H | -6.668929  | 5.282401  | -9.491437  | -2.837448 |
| 1KPF | A | ALA | 86  | H | -6.570490  | 5.340520  | -9.432437  | -2.757300 |
| 1KPF | A | ASP | 87  | H | -6.264503  | 5.593052  | -9.379080  | -2.927452 |
| 1KPF | A | LEU | 88  | H | -5.306192  | 6.589371  | -8.559428  | -3.834183 |
| 1KPF | A | GLY | 89  | C | -3.423594  | 2.013035  | -5.895493  | -2.437284 |
| 1KPF | A | LEU | 90  | T | -3.404444  | 2.196055  | -5.881839  | -2.446544 |
| 1KPF | A | ASN | 91  | T | -3.404688  | 2.195323  | -5.880827  | -2.446962 |
| 1KPF | A | LYS | 92  | T | -3.406548  | 2.184329  | -5.870292  | -2.445024 |
| 1KPF | A | GLY | 93  | T | -3.426454  | 2.024482  | -5.782561  | -2.389075 |
| 1KPF | A | TYR | 94  | E | -5.386586  | 7.482291  | -5.792809  | -2.690218 |
| 1KPF | A | ARG | 95  | E | -7.928358  | 9.400213  | -10.839130 | -4.280416 |
| 1KPF | A | MET | 96  | E | -8.592673  | 12.900522 | -12.311108 | -6.108508 |
| 1KPF | A | VAL | 97  | E | -9.263812  | 10.160820 | -13.002877 | -4.523751 |
| 1KPF | A | VAL | 98  | C | -9.227369  | 9.027501  | -13.982107 | -4.737420 |
| 1KPF | A | ASN | 99  | C | -8.895596  | 6.504982  | -13.996262 | -4.138775 |
| 1KPF | A | GLU | 100 | C | -5.929333  | 0.654063  | -10.165547 | -2.782348 |
| 1KPF | A | GLY | 101 | C | -3.806223  | -1.881684 | -8.319935  | -2.370874 |
| 1KPF | A | SER | 102 | G | -3.804031  | -1.869616 | -8.335970  | -2.375451 |
| 1KPF | A | ASP | 103 | G | -3.802464  | -1.854865 | -8.349603  | -2.382053 |
| 1KPF | A | GLY | 104 | G | -3.802421  | -1.854273 | -8.349774  | -2.382091 |
| 1KPF | A | GLY | 105 | C | -3.818933  | -1.923728 | -8.298508  | -2.370841 |
| 1KPF | A | GLN | 106 | C | -6.780982  | 2.511756  | -12.989115 | -4.114512 |
| 1KPF | A | SER | 107 | C | -7.277176  | 3.866337  | -13.438122 | -4.776055 |
| 1KPF | A | VAL | 108 | C | -8.923386  | 5.187283  | -12.490084 | -3.180332 |
| 1KPF | A | TYR | 109 | C | -10.134076 | 7.547255  | -12.987942 | -3.473301 |
| 1KPF | A | HIS | 110 | C | -12.599579 | 12.714227 | -14.966762 | -3.986739 |
| 1KPF | A | VAL | 111 | C | -12.765131 | 13.792500 | -13.560030 | -3.348803 |
| 1KPF | A | HIS | 112 | C | -13.551479 | 15.886470 | -13.663019 | -3.293117 |
| 1KPF | A | LEU | 113 | E | -12.120896 | 15.238896 | -13.221246 | -4.382803 |
| 1KPF | A | HIS | 114 | E | -11.041397 | 10.715527 | -12.455155 | -3.197376 |
| 1KPF | A | VAL | 115 | E | -10.391782 | 10.524608 | -12.724179 | -3.669082 |
| 1KPF | A | LEU | 116 | E | -9.403747  | 10.102521 | -15.055225 | -6.275887 |
| 1KPF | A | GLY | 117 | E | -7.709896  | 7.246870  | -14.592969 | -6.780943 |
| 1KPF | A | GLY | 118 | C | -6.764987  | 6.620556  | -13.048856 | -6.169754 |
| 1KPF | A | ARG | 119 | C | -6.503632  | 6.298865  | -12.730203 | -5.839450 |
| 1KPF | A | GLN | 120 | C | -5.690231  | 4.984400  | -11.015641 | -4.971601 |
| 1KPF | A | MET | 121 | C | -5.086711  | 4.644833  | -9.676496  | -4.316553 |
| 1KPF | A | HIS | 122 | T | -1.537086  | 1.502379  | -3.557790  | -2.270251 |
| 1KPF | A | TRP | 123 | T | 0.245483   | 3.380779  | -1.777011  | -2.942946 |
| 1KPF | A | PRO | 124 | T | 0.245483   | 3.380779  | -1.777011  | -2.942946 |
| 1KPF | A | PRO | 125 | T | 0.245483   | 3.380779  | -1.777011  | -2.942946 |
| 1KPF | A | GLY | 126 | C | 0.245483   | 3.380779  | -1.777011  | -2.942946 |
| 1KTH | A | GLU | 1   | C | -6.742044  | 5.215069  | -11.601104 | -4.129149 |



|      |   |     |    |   |            |           |            |           |
|------|---|-----|----|---|------------|-----------|------------|-----------|
| 1KTH | A | THR | 2  | C | -6.742044  | 5.215069  | -11.601104 | -4.129149 |
| 1KTH | A | ASP | 3  | G | -6.742044  | 5.215069  | -11.601104 | -4.129149 |
| 1KTH | A | ILE | 4  | G | -6.742044  | 5.215069  | -11.601104 | -4.129149 |
| 1KTH | A | CYS | 5  | G | -7.885814  | 7.246231  | -14.085623 | -5.353893 |
| 1KTH | A | LYS | 6  | G | -8.298148  | 8.748730  | -14.321357 | -5.650805 |
| 1KTH | A | LEU | 7  | C | -8.435573  | 9.291224  | -13.896020 | -5.358994 |
| 1KTH | A | PRO | 8  | C | -6.885429  | 7.192845  | -11.569077 | -4.889184 |
| 1KTH | A | LYS | 9  | C | -6.666955  | 7.238432  | -11.673320 | -4.900278 |
| 1KTH | A | ASP | 10 | C | -6.611899  | 7.034398  | -11.859881 | -4.911922 |
| 1KTH | A | GLU | 11 | C | -5.223597  | 6.242003  | -10.150579 | -4.816017 |
| 1KTH | A | GLY | 12 | C | -3.723136  | 3.992796  | -8.021642  | -3.968253 |
| 1KTH | A | THR | 13 | B | -3.619211  | 4.401894  | -7.909300  | -3.932238 |
| 1KTH | A | CYS | 14 | C | -3.529073  | 4.726081  | -7.781776  | -3.877067 |
| 1KTH | A | ARG | 15 | C | -3.518169  | 4.825639  | -7.762612  | -3.871644 |
| 1KTH | A | ASP | 16 | C | -3.548529  | 4.762290  | -7.643180  | -3.821299 |
| 1KTH | A | PHE | 17 | C | -4.235804  | 6.852273  | -7.197408  | -3.650106 |
| 1KTH | A | ILE | 18 | E | -4.606292  | 7.124263  | -7.025623  | -3.555449 |
| 1KTH | A | LEU | 19 | E | -5.839287  | 10.184777 | -7.026481  | -3.666270 |
| 1KTH | A | LYS | 20 | E | -7.523591  | 12.775145 | -8.918726  | -4.627546 |
| 1KTH | A | TRP | 21 | E | -10.802483 | 18.676066 | -11.060566 | -5.346792 |
| 1KTH | A | TYR | 22 | E | -11.834558 | 14.749254 | -14.556475 | -5.347221 |
| 1KTH | A | TYR | 23 | E | -9.087160  | 9.674163  | -12.911950 | -4.899808 |
| 1KTH | A | ASP | 24 | E | -4.911592  | 6.374253  | -8.569350  | -4.378535 |
| 1KTH | A | PRO | 25 | T | -4.708671  | 6.300556  | -8.719923  | -4.301697 |
| 1KTH | A | ASN | 26 | T | -4.696354  | 6.277107  | -8.795271  | -4.311082 |
| 1KTH | A | THR | 27 | T | -4.695704  | 6.276711  | -8.800832  | -4.311290 |
| 1KTH | A | LYS | 28 | T | -4.695980  | 6.275158  | -8.799016  | -4.310976 |
| 1KTH | A | SER | 29 | E | -5.398529  | 6.053665  | -9.325221  | -4.156369 |
| 1KTH | A | CYS | 30 | E | -6.960750  | 5.268516  | -12.454342 | -4.741614 |
| 1KTH | A | ALA | 31 | E | -8.621609  | 7.021875  | -13.672896 | -4.538001 |
| 1KTH | A | ARG | 32 | E | -9.661490  | 12.355661 | -12.689268 | -4.717820 |
| 1KTH | A | PHE | 33 | E | -10.147951 | 16.080042 | -11.517935 | -4.929891 |
| 1KTH | A | TRP | 34 | E | -9.680364  | 13.932526 | -13.122457 | -5.537280 |
| 1KTH | A | TYR | 35 | E | -8.176389  | 7.541590  | -13.646945 | -5.368130 |
| 1KTH | A | GLY | 36 | C | -4.277391  | 3.372707  | -10.411815 | -5.155543 |
| 1KTH | A | GLY | 37 | C | -4.262772  | 3.389111  | -10.495794 | -5.171647 |
| 1KTH | A | CYS | 38 | B | -4.257180  | 3.400185  | -10.526190 | -5.174875 |
| 1KTH | A | GLY | 39 | C | -4.256703  | 3.402559  | -10.529670 | -5.175430 |
| 1KTH | A | GLY | 40 | C | -4.257093  | 3.401500  | -10.527762 | -5.175767 |
| 1KTH | A | ASN | 41 | T | -6.243831  | 4.349947  | -13.832050 | -5.733963 |
| 1KTH | A | GLU | 42 | T | -6.935823  | 5.041404  | -13.810195 | -5.568344 |
| 1KTH | A | ASN | 43 | T | -8.111331  | 8.026998  | -14.405867 | -5.950313 |
| 1KTH | A | LYS | 44 | T | -8.603787  | 9.901114  | -13.857103 | -6.063201 |
| 1KTH | A | PHE | 45 | B | -9.269848  | 11.999467 | -13.139648 | -5.498318 |
| 1KTH | A | GLY | 46 | C | -6.810706  | 7.982320  | -11.397526 | -5.283350 |
| 1KTH | A | SER | 47 | C | -6.778175  | 7.996527  | -11.509921 | -5.289814 |
| 1KTH | A | GLN | 48 | H | -6.776502  | 8.006364  | -11.527139 | -5.296931 |
| 1KTH | A | LYS | 49 | H | -6.739726  | 8.029587  | -11.721547 | -5.354558 |
| 1KTH | A | GLU | 50 | H | -6.730387  | 8.025007  | -11.781103 | -5.368322 |
| 1KTH | A | CYS | 51 | H | -7.761690  | 9.324339  | -14.302640 | -6.185185 |
| 1KTH | A | GLU | 52 | H | -6.761397  | 10.904299 | -11.199989 | -6.074320 |
| 1KTH | A | LYS | 53 | H | -4.972720  | 9.585028  | -7.695776  | -4.827300 |
| 1KTH | A | VAL | 54 | H | -4.423134  | 8.744791  | -6.983002  | -4.163436 |
| 1KTH | A | CYS | 55 | H | -2.957147  | 6.166838  | -4.743464  | -3.053221 |
| 1KTH | A | ALA | 56 | C | -2.957147  | 6.166838  | -4.743464  | -3.053221 |
| 1KTH | A | PRO | 57 | C | -2.957147  | 6.166838  | -4.743464  | -3.053221 |
| 1KTH | A | VAL | 58 | C | -2.957147  | 6.166838  | -4.743464  | -3.053221 |
| 1L8J | A | LEU | 8  | C | -9.911735  | 11.631997 | -10.696206 | -3.462242 |
| 1L8J | A | GLN | 9  | E | -9.911735  | 11.631997 | -10.696206 | -3.462242 |
| 1L8J | A | ARG | 10 | E | -9.911735  | 11.631997 | -10.696206 | -3.462242 |
| 1L8J | A | LEU | 11 | E | -9.911735  | 11.631997 | -10.696206 | -3.462242 |
| 1L8J | A | HIS | 12 | E | -12.751162 | 14.127378 | -14.982775 | -4.787319 |
| 1L8J | A | MET | 13 | E | -14.786349 | 15.752295 | -18.801941 | -5.842102 |
| 1L8J | A | LEU | 14 | E | -15.029569 | 14.476541 | -19.128574 | -5.513724 |
| 1L8J | A | GLN | 15 | E | -14.980075 | 14.758610 | -19.050254 | -5.502974 |
| 1L8J | A | ILE | 16 | E | -14.178254 | 16.881191 | -15.784521 | -4.798685 |
| 1L8J | A | SER | 17 | E | -13.859432 | 16.698406 | -15.472171 | -4.689884 |
| 1L8J | A | TYR | 18 | E | -13.215877 | 17.607006 | -13.562194 | -4.317098 |
| 1L8J | A | PHE | 19 | E | -11.407419 | 16.940082 | -11.941618 | -4.756328 |
| 1L8J | A | ARG | 20 | E | -8.121323  | 10.218624 | -9.620902  | -3.853526 |
| 1L8J | A | ASP | 21 | E | -8.066810  | 10.339262 | -9.751617  | -3.883181 |
| 1L8J | A | PRO | 22 | T | -8.062983  | 10.362796 | -9.764220  | -3.884730 |
| 1L8J | A | TYR | 23 | T | -8.062984  | 10.362645 | -9.764403  | -3.884809 |
| 1L8J | A | HIS | 24 | E | -8.064976  | 10.340598 | -9.757408  | -3.881807 |
| 1L8J | A | VAL | 25 | E | -9.462383  | 11.773065 | -11.166437 | -4.188561 |
| 1L8J | A | TRP | 26 | E | -11.008499 | 14.061143 | -11.933640 | -4.164463 |
| 1L8J | A | TYR | 27 | E | -12.324059 | 14.095201 | -15.098623 | -4.723730 |
| 1L8J | A | GLN | 28 | E | -10.751823 | 8.722838  | -14.772188 | -4.426161 |
| 1L8J | A | GLY | 29 | E | -10.435609 | 9.725359  | -14.637470 | -4.608295 |
| 1L8J | A | ASN | 30 | E | -10.273712 | 10.049902 | -14.371069 | -4.546876 |
| 1L8J | A | ALA | 31 | E | -9.070073  | 9.720610  | -11.989997 | -4.214811 |

|      |   |     |     |   |            |           |            |           |
|------|---|-----|-----|---|------------|-----------|------------|-----------|
| 1L8J | A | SER | 32  | E | -6.083509  | 7.418263  | -8.770934  | -4.082894 |
| 1L8J | A | LEU | 33  | E | -4.702099  | 7.832064  | -7.193092  | -4.213630 |
| 1L8J | A | GLY | 34  | T | -4.552921  | 7.466449  | -7.824687  | -4.380602 |
| 1L8J | A | GLY | 35  | T | -4.551973  | 7.468025  | -7.831000  | -4.380959 |
| 1L8J | A | HIS | 36  | E | -4.552216  | 7.467139  | -7.829468  | -4.381047 |
| 1L8J | A | LEU | 37  | E | -4.598408  | 7.471852  | -7.754316  | -4.404989 |
| 1L8J | A | THR | 38  | E | -5.439109  | 6.201513  | -10.038899 | -4.958068 |
| 1L8J | A | HIS | 39  | E | -8.347800  | 8.561986  | -11.823814 | -4.594918 |
| 1L8J | A | VAL | 40  | E | -10.062846 | 11.888893 | -13.597724 | -4.753741 |
| 1L8J | A | LEU | 41  | E | -9.850934  | 13.816273 | -14.035756 | -6.065550 |
| 1L8J | A | GLU | 42  | E | -8.349946  | 6.731796  | -12.684343 | -4.280292 |
| 1L8J | A | GLY | 43  | E | -5.089498  | 3.806534  | -8.885168  | -3.664231 |
| 1L8J | A | PRO | 44  | E | -3.834552  | 6.387179  | -6.971991  | -4.087552 |
| 1L8J | A | ASP | 45  | T | -3.680478  | 6.453852  | -6.987493  | -4.061960 |
| 1L8J | A | THR | 46  | T | -3.562126  | 7.040329  | -6.691987  | -4.026077 |
| 1L8J | A | ASN | 47  | T | -3.557563  | 7.068273  | -6.693833  | -4.023776 |
| 1L8J | A | THR | 48  | T | -3.603943  | 7.333040  | -6.514375  | -4.051836 |
| 1L8J | A | THR | 49  | E | -4.142303  | 8.191833  | -6.212373  | -3.904671 |
| 1L8J | A | ILE | 50  | E | -4.550843  | 9.705069  | -5.407235  | -3.843043 |
| 1L8J | A | ILE | 51  | E | -6.408321  | 10.521826 | -7.206264  | -3.739114 |
| 1L8J | A | GLN | 52  | E | -8.397270  | 11.251102 | -11.237618 | -4.378640 |
| 1L8J | A | LEU | 53  | T | -8.615835  | 10.342053 | -11.810981 | -4.340115 |
| 1L8J | A | GLN | 54  | T | -8.736752  | 9.608212  | -12.065573 | -4.302885 |
| 1L8J | A | PRO | 55  | T | -8.678638  | 9.315906  | -12.314554 | -4.349490 |
| 1L8J | A | LEU | 56  | T | -9.029389  | 9.296346  | -12.850387 | -4.546823 |
| 1L8J | A | GLN | 57  | T | -9.647774  | 8.396827  | -14.791727 | -4.909844 |
| 1L8J | A | GLU | 58  | T | -9.660803  | 8.228662  | -14.841631 | -4.885166 |
| 1L8J | A | PRO | 59  | H | -9.704923  | 8.118437  | -14.709765 | -4.783677 |
| 1L8J | A | GLU | 60  | H | -10.414840 | 7.367830  | -16.481596 | -4.849197 |
| 1L8J | A | SER | 61  | H | -10.528633 | 7.302576  | -16.448602 | -4.798848 |
| 1L8J | A | TRP | 62  | H | -10.878890 | 9.414132  | -15.768335 | -4.845380 |
| 1L8J | A | ALA | 63  | H | -11.208786 | 8.806522  | -16.515359 | -4.693467 |
| 1L8J | A | ARG | 64  | H | -11.289550 | 6.809240  | -17.426063 | -4.479605 |
| 1L8J | A | THR | 65  | H | -10.965912 | 7.109599  | -16.789371 | -4.551102 |
| 1L8J | A | GLN | 66  | H | -10.834857 | 7.385252  | -16.663963 | -4.594402 |
| 1L8J | A | SER | 67  | H | -9.867720  | 7.248133  | -14.320694 | -4.109843 |
| 1L8J | A | GLY | 68  | H | -9.876304  | 7.335400  | -14.267453 | -4.122940 |
| 1L8J | A | LEU | 69  | H | -9.900023  | 7.402951  | -14.101259 | -4.091421 |
| 1L8J | A | GLN | 70  | H | -9.951802  | 7.365517  | -13.934194 | -4.044321 |
| 1L8J | A | SER | 71  | H | -9.981901  | 7.296691  | -13.816717 | -4.007940 |
| 1L8J | A | TYR | 72  | H | -12.277946 | 10.606124 | -16.308447 | -4.659175 |
| 1L8J | A | LEU | 73  | H | -13.293942 | 11.659480 | -17.199242 | -4.541461 |
| 1L8J | A | LEU | 74  | H | -13.190491 | 10.647654 | -17.989357 | -4.765592 |
| 1L8J | A | GLN | 75  | H | -13.572595 | 10.551075 | -19.260467 | -5.237473 |
| 1L8J | A | PHE | 76  | H | -12.703881 | 14.155443 | -14.916584 | -4.621709 |
| 1L8J | A | HIS | 77  | H | -11.417623 | 12.849657 | -12.983803 | -4.011393 |
| 1L8J | A | GLY | 78  | H | -10.345603 | 12.390815 | -11.789724 | -3.889697 |
| 1L8J | A | LEU | 79  | H | -10.270605 | 12.796409 | -11.764608 | -3.910289 |
| 1L8J | A | VAL | 80  | H | -10.263280 | 12.828592 | -11.774718 | -3.906675 |
| 1L8J | A | ARG | 81  | H | -10.166114 | 12.689247 | -11.915242 | -3.909206 |
| 1L8J | A | LEU | 82  | H | -9.821000  | 11.777904 | -12.032716 | -3.986347 |
| 1L8J | A | VAL | 83  | H | -9.796504  | 11.597491 | -12.243032 | -4.095849 |
| 1L8J | A | HIS | 84  | H | -7.798854  | 9.294245  | -11.049532 | -4.573233 |
| 1L8J | A | GLN | 85  | H | -7.619823  | 9.821622  | -10.651837 | -4.411736 |
| 1L8J | A | GLU | 86  | H | -7.358566  | 10.167979 | -10.009320 | -4.145023 |
| 1L8J | A | ARG | 87  | H | -7.263091  | 10.911914 | -9.519854  | -4.047019 |
| 1L8J | A | THR | 88  | C | -6.290983  | 12.376512 | -6.044434  | -3.324502 |
| 1L8J | A | LEU | 89  | C | -6.275612  | 12.808032 | -5.766415  | -3.269704 |
| 1L8J | A | ALA | 90  | C | -6.284025  | 12.858156 | -5.696300  | -3.253307 |
| 1L8J | A | PHE | 91  | C | -6.319432  | 12.987533 | -5.501219  | -3.227896 |
| 1L8J | A | PRO | 92  | C | -6.338414  | 12.922629 | -5.454223  | -3.218669 |
| 1L8J | A | LEU | 93  | E | -7.567557  | 14.282359 | -7.105545  | -3.682883 |
| 1L8J | A | THR | 94  | E | -8.830329  | 13.648926 | -8.341733  | -3.454931 |
| 1L8J | A | ILE | 95  | E | -10.753170 | 16.789605 | -9.998137  | -3.629658 |
| 1L8J | A | ARG | 96  | E | -11.336410 | 15.393469 | -12.339288 | -4.006468 |
| 1L8J | A | CYS | 97  | E | -11.388380 | 14.202513 | -13.751882 | -4.576398 |
| 1L8J | A | PHE | 98  | E | -11.485407 | 13.794666 | -14.286414 | -4.778673 |
| 1L8J | A | LEU | 99  | E | -11.275552 | 13.914330 | -15.357784 | -5.761538 |
| 1L8J | A | GLY | 100 | E | -10.929329 | 12.671590 | -15.746150 | -5.777755 |
| 1L8J | A | CYS | 101 | E | -9.925263  | 10.757727 | -14.228509 | -5.169670 |
| 1L8J | A | GLU | 102 | E | -6.940945  | 8.433552  | -9.053069  | -3.778590 |
| 1L8J | A | LEU | 103 | E | -2.908070  | 6.027234  | -4.226455  | -3.155279 |
| 1L8J | A | PRO | 104 | T | -0.957097  | 2.867366  | -3.843346  | -3.177385 |
| 1L8J | A | PRO | 105 | T | -0.946202  | 2.865328  | -3.922237  | -3.191651 |
| 1L8J | A | GLU | 106 | T | -0.944568  | 2.871667  | -3.935218  | -3.194293 |
| 1L8J | A | GLY | 107 | T | -0.944559  | 2.871554  | -3.935357  | -3.194283 |
| 1L8J | A | SER | 108 | C | -0.976025  | 2.652280  | -3.851433  | -3.140670 |
| 1L8J | A | ARG | 109 | C | -3.448234  | 2.138551  | -6.965734  | -2.930922 |
| 1L8J | A | ALA | 110 | C | -4.636272  | 4.279209  | -7.396385  | -3.092150 |
| 1L8J | A | HIS | 111 | E | -6.677660  | 6.632829  | -9.897335  | -3.595332 |
| 1L8J | A | VAL | 112 | E | -7.596939  | 10.481789 | -10.483579 | -4.646963 |

|      |   |     |     |   |            |           |            |           |
|------|---|-----|-----|---|------------|-----------|------------|-----------|
| 1L8J | A | PHE | 113 | E | -9.228511  | 13.999915 | -12.622636 | -6.419344 |
| 1L8J | A | PHE | 114 | E | -10.871017 | 18.213832 | -10.646649 | -4.274988 |
| 1L8J | A | GLU | 115 | E | -9.874373  | 12.205757 | -11.152250 | -3.784365 |
| 1L8J | A | VAL | 116 | E | -7.628260  | 9.012258  | -9.368526  | -3.597121 |
| 1L8J | A | ALA | 117 | E | -6.097131  | 6.103883  | -8.791885  | -3.408722 |
| 1L8J | A | VAL | 118 | E | -4.761099  | 5.738853  | -7.394785  | -3.429834 |
| 1L8J | A | ASN | 119 | T | -4.756649  | 5.770594  | -7.415109  | -3.436858 |
| 1L8J | A | GLY | 120 | T | -4.755534  | 5.783103  | -7.416567  | -3.436890 |
| 1L8J | A | SER | 121 | E | -4.760099  | 5.758578  | -7.401752  | -3.435661 |
| 1L8J | A | SER | 122 | E | -4.820458  | 5.746632  | -7.257263  | -3.439985 |
| 1L8J | A | PHE | 123 | E | -7.513853  | 10.491485 | -9.747056  | -4.174987 |
| 1L8J | A | VAL | 124 | E | -8.426592  | 12.344640 | -8.425989  | -3.473296 |
| 1L8J | A | SER | 125 | E | -11.991331 | 14.746744 | -13.705562 | -4.215370 |
| 1L8J | A | PHE | 126 | E | -10.905229 | 13.206492 | -11.822690 | -3.837345 |
| 1L8J | A | ARG | 127 | E | -9.514579  | 10.463281 | -11.191537 | -3.601071 |
| 1L8J | A | PRO | 128 | G | -9.390336  | 10.375747 | -11.455846 | -3.639540 |
| 1L8J | A | GLU | 129 | G | -9.380253  | 10.420858 | -11.505247 | -3.662632 |
| 1L8J | A | ARG | 130 | G | -9.380306  | 10.420407 | -11.505306 | -3.662750 |
| 1L8J | A | ALA | 131 | C | -9.422381  | 10.230621 | -11.504480 | -3.656573 |
| 1L8J | A | LEU | 132 | E | -10.297609 | 10.434142 | -12.855076 | -3.953725 |
| 1L8J | A | TRP | 133 | E | -11.334901 | 13.407321 | -15.417251 | -5.470530 |
| 1L8J | A | GLN | 134 | E | -8.166119  | 7.656423  | -13.181246 | -5.243249 |
| 1L8J | A | ALA | 135 | E | -4.261785  | 5.309741  | -6.937073  | -3.631721 |
| 1L8J | A | ASP | 136 | C | -2.929696  | 4.690146  | -5.919544  | -3.717917 |
| 1L8J | A | THR | 137 | C | -2.691585  | 4.356173  | -5.977019  | -3.544492 |
| 1L8J | A | GLN | 138 | C | -2.540615  | 3.851038  | -6.318802  | -3.535464 |
| 1L8J | A | VAL | 139 | C | -2.535683  | 3.858860  | -6.345522  | -3.539478 |
| 1L8J | A | THR | 140 | C | -2.569264  | 3.770304  | -6.303578  | -3.529054 |
| 1L8J | A | SER | 141 | C | -2.971001  | 2.920648  | -6.718187  | -3.299291 |
| 1L8J | A | GLY | 142 | H | -3.413490  | 2.136212  | -7.453806  | -3.451077 |
| 1L8J | A | VAL | 143 | H | -5.337426  | 5.016860  | -9.464669  | -3.961541 |
| 1L8J | A | VAL | 144 | H | -6.842051  | 8.511626  | -10.144568 | -4.258425 |
| 1L8J | A | THR | 145 | H | -7.694901  | 10.258727 | -11.904937 | -5.497317 |
| 1L8J | A | PHE | 146 | H | -8.985932  | 15.174889 | -12.983621 | -7.204593 |
| 1L8J | A | THR | 147 | H | -10.449612 | 17.430787 | -13.926896 | -7.246244 |
| 1L8J | A | LEU | 148 | H | -11.610548 | 15.718402 | -14.000635 | -5.122435 |
| 1L8J | A | GLN | 149 | H | -11.695583 | 13.624521 | -15.033084 | -5.089621 |
| 1L8J | A | GLN | 150 | H | -11.625229 | 12.076378 | -15.671090 | -5.092227 |
| 1L8J | A | LEU | 151 | H | -9.918468  | 9.291562  | -13.476733 | -4.514906 |
| 1L8J | A | ASN | 152 | H | -9.720187  | 8.533533  | -13.972919 | -4.497280 |
| 1L8J | A | ALA | 153 | C | -8.741805  | 7.584411  | -12.717476 | -4.175927 |
| 1L8J | A | TYR | 154 | C | -8.742441  | 7.577657  | -12.714024 | -4.173765 |
| 1L8J | A | ASN | 155 | H | -8.744866  | 7.562935  | -12.703807 | -4.171062 |
| 1L8J | A | ARG | 156 | H | -8.827641  | 7.326846  | -12.607260 | -4.124487 |
| 1L8J | A | THR | 157 | H | -8.866764  | 7.366925  | -12.429491 | -4.101653 |
| 1L8J | A | ARG | 158 | H | -12.604167 | 10.904140 | -17.383602 | -5.067439 |
| 1L8J | A | TYR | 159 | H | -12.571896 | 12.839986 | -16.284645 | -5.050966 |
| 1L8J | A | GLU | 160 | H | -12.387803 | 13.502462 | -15.585869 | -4.907243 |
| 1L8J | A | LEU | 161 | H | -12.364201 | 13.771814 | -15.438679 | -4.877259 |
| 1L8J | A | ARG | 162 | H | -12.373692 | 13.774754 | -15.408451 | -4.878628 |
| 1L8J | A | GLU | 163 | H | -12.314616 | 13.772593 | -15.487993 | -4.891848 |
| 1L8J | A | PHE | 164 | H | -12.569947 | 14.478164 | -15.350206 | -4.817240 |
| 1L8J | A | LEU | 165 | H | -12.098185 | 11.542744 | -16.057725 | -4.925217 |
| 1L8J | A | GLU | 166 | H | -11.402777 | 9.153698  | -16.278298 | -4.817941 |
| 1L8J | A | ASP | 167 | H | -10.186478 | 7.397838  | -14.622670 | -4.245952 |
| 1L8J | A | THR | 168 | H | -10.180159 | 7.440488  | -14.636479 | -4.251277 |
| 1L8J | A | CYS | 169 | H | -10.181252 | 7.433682  | -14.636286 | -4.252190 |
| 1L8J | A | VAL | 170 | H | -10.175092 | 7.831512  | -14.548756 | -4.336432 |
| 1L8J | A | GLN | 171 | H | -10.121032 | 9.448771  | -14.098262 | -4.624330 |
| 1L8J | A | TYR | 172 | H | -9.564561  | 16.821906 | -10.188648 | -5.360257 |
| 1L8J | A | VAL | 173 | H | -5.714757  | 11.376698 | -6.006028  | -3.904479 |
| 1L8J | A | GLN | 174 | H | -4.184308  | 8.838156  | -5.625230  | -3.745993 |
| 1L8J | A | LYS | 175 | H | -4.184308  | 8.838156  | -5.625230  | -3.745993 |
| 1L8J | A | HIS | 176 | H | -4.184308  | 8.838156  | -5.625230  | -3.745993 |
| 1L8J | A | ILE | 177 | C | -4.184308  | 8.838156  | -5.625230  | -3.745993 |
| 1L9L | A | GLY | 1   | H | -10.986313 | 9.744895  | -16.488861 | -5.268003 |
| 1L9L | A | ARG | 2   | H | -10.986313 | 9.744895  | -16.488861 | -5.268003 |
| 1L9L | A | ASP | 3   | H | -10.986313 | 9.744895  | -16.488861 | -5.268003 |
| 1L9L | A | TYR | 4   | H | -10.986313 | 9.744895  | -16.488861 | -5.268003 |
| 1L9L | A | ARG | 5   | H | -10.406142 | 10.908195 | -14.533248 | -5.046874 |
| 1L9L | A | THR | 6   | H | -9.506934  | 13.049515 | -12.184866 | -4.973282 |
| 1L9L | A | CYS | 7   | H | -9.026075  | 12.907639 | -11.508955 | -4.652366 |
| 1L9L | A | LEU | 8   | H | -9.000044  | 12.917992 | -11.571133 | -4.649484 |
| 1L9L | A | THR | 9   | H | -8.976929  | 12.912977 | -11.652177 | -4.660855 |
| 1L9L | A | ILE | 10  | H | -9.023368  | 13.081678 | -11.450979 | -4.636599 |
| 1L9L | A | VAL | 11  | H | -9.281586  | 12.833222 | -11.345434 | -4.462860 |
| 1L9L | A | GLN | 12  | H | -10.319820 | 12.654308 | -13.961699 | -4.953705 |
| 1L9L | A | LYS | 13  | H | -10.383063 | 12.527463 | -14.751810 | -5.390563 |
| 1L9L | A | LEU | 14  | H | -10.119950 | 12.339587 | -14.008970 | -5.145548 |
| 1L9L | A | LYS | 15  | H | -8.545035  | 8.704193  | -12.930181 | -4.859271 |
| 1L9L | A | LYS | 16  | H | -6.352657  | 7.926702  | -9.983294  | -4.565930 |

|      |   |     |    |   |            |           |            |           |
|------|---|-----|----|---|------------|-----------|------------|-----------|
| 1L9L | A | MET | 17 | H | -5.698887  | 8.682864  | -8.775350  | -4.264793 |
| 1L9L | A | VAL | 18 | T | -4.734470  | 7.281796  | -7.627028  | -3.792252 |
| 1L9L | A | ASP | 19 | T | -4.653738  | 7.154382  | -7.870347  | -3.830975 |
| 1L9L | A | LYS | 20 | T | -4.648649  | 7.149343  | -7.893417  | -3.829693 |
| 1L9L | A | PRO | 21 | T | -4.682041  | 7.105035  | -7.777080  | -3.787175 |
| 1L9L | A | THR | 22 | C | -4.757699  | 6.838214  | -7.723787  | -3.742145 |
| 1L9L | A | GLN | 23 | H | -5.827971  | 6.324727  | -9.643932  | -4.075117 |
| 1L9L | A | ARG | 24 | H | -7.354299  | 6.878291  | -11.000337 | -3.846093 |
| 1L9L | A | SER | 25 | H | -9.090432  | 8.163524  | -13.466263 | -4.121244 |
| 1L9L | A | VAL | 26 | H | -9.311487  | 8.709597  | -13.318764 | -4.142706 |
| 1L9L | A | SER | 27 | H | -9.367199  | 7.466970  | -14.320321 | -4.331293 |
| 1L9L | A | ASN | 28 | H | -8.904572  | 7.409548  | -13.771620 | -4.217510 |
| 1L9L | A | ALA | 29 | H | -8.883560  | 7.621329  | -13.649028 | -4.195526 |
| 1L9L | A | ALA | 30 | H | -8.872356  | 7.646295  | -13.676029 | -4.201247 |
| 1L9L | A | THR | 31 | H | -8.852178  | 7.516263  | -13.759027 | -4.197755 |
| 1L9L | A | ARG | 32 | H | -9.013767  | 7.807076  | -13.664742 | -4.138953 |
| 1L9L | A | VAL | 33 | H | -8.245690  | 7.241342  | -12.859696 | -4.441694 |
| 1L9L | A | CYS | 34 | T | -6.271326  | 4.469731  | -10.886975 | -3.912792 |
| 1L9L | A | ARG | 35 | T | -5.794851  | 4.119876  | -10.610213 | -3.677831 |
| 1L9L | A | THR | 36 | T | -5.622044  | 3.983252  | -10.681817 | -3.630106 |
| 1L9L | A | GLY | 37 | C | -5.616521  | 4.011657  | -10.694300 | -3.632891 |
| 1L9L | A | ARG | 38 | C | -5.622745  | 3.979694  | -10.673075 | -3.623801 |
| 1L9L | A | SER | 39 | H | -5.853894  | 3.791858  | -10.604335 | -3.495024 |
| 1L9L | A | ARG | 40 | H | -6.412679  | 3.719932  | -10.944906 | -3.506438 |
| 1L9L | A | TRP | 41 | H | -8.348285  | 7.139878  | -12.157223 | -3.930616 |
| 1L9L | A | ARG | 42 | H | -10.442765 | 9.360714  | -13.337772 | -3.649179 |
| 1L9L | A | ASP | 43 | H | -10.464443 | 6.335279  | -16.700357 | -5.001984 |
| 1L9L | A | VAL | 44 | H | -10.466688 | 6.329802  | -16.689434 | -5.002080 |
| 1L9L | A | CYS | 45 | H | -10.468344 | 6.318125  | -16.679020 | -4.999171 |
| 1L9L | A | ARG | 46 | H | -10.465066 | 6.355169  | -16.672533 | -4.996068 |
| 1L9L | A | ASN | 47 | H | -9.989716  | 10.124506 | -14.330252 | -4.846360 |
| 1L9L | A | PHE | 48 | H | -10.295703 | 13.334285 | -12.561902 | -4.740019 |
| 1L9L | A | MET | 49 | H | -10.021766 | 13.017782 | -12.767724 | -4.725076 |
| 1L9L | A | ARG | 50 | H | -9.574854  | 11.503916 | -12.679902 | -4.334697 |
| 1L9L | A | ARG | 51 | H | -9.575731  | 11.501828 | -12.673755 | -4.333494 |
| 1L9L | A | TYR | 52 | H | -9.767196  | 10.874212 | -12.749955 | -4.183697 |
| 1L9L | A | GLN | 53 | H | -9.781271  | 10.736457 | -12.746457 | -4.167160 |
| 1L9L | A | SER | 54 | H | -9.950056  | 10.162081 | -12.616211 | -3.989964 |
| 1L9L | A | ARG | 55 | H | -13.219641 | 10.889313 | -18.449422 | -4.737280 |
| 1L9L | A | VAL | 56 | H | -11.187670 | 13.666165 | -13.339473 | -4.652488 |
| 1L9L | A | ILE | 57 | H | -10.623669 | 12.535262 | -13.561817 | -4.597884 |
| 1L9L | A | GLN | 58 | H | -8.781572  | 9.540078  | -12.070813 | -4.360453 |
| 1L9L | A | GLY | 59 | H | -6.807820  | 8.293096  | -9.844152  | -4.125675 |
| 1L9L | A | LEU | 60 | H | -6.729891  | 8.362355  | -10.032197 | -4.169089 |
| 1L9L | A | VAL | 61 | H | -6.585694  | 7.745611  | -10.630171 | -4.284492 |
| 1L9L | A | ALA | 62 | H | -6.502760  | 7.581789  | -10.917043 | -4.367567 |
| 1L9L | A | GLY | 63 | C | -6.509935  | 7.542924  | -10.928257 | -4.375464 |
| 1L9L | A | GLU | 64 | C | -7.022051  | 6.573647  | -12.585463 | -4.741154 |
| 1L9L | A | THR | 65 | C | -7.119053  | 6.285558  | -12.822858 | -4.803650 |
| 1L9L | A | ALA | 66 | H | -7.568284  | 7.162069  | -12.853659 | -4.919154 |
| 1L9L | A | GLN | 67 | H | -8.499504  | 9.637030  | -12.948094 | -4.922959 |
| 1L9L | A | GLN | 68 | H | -8.657069  | 10.400187 | -12.372098 | -4.844908 |
| 1L9L | A | ILE | 69 | H | -8.475631  | 11.462020 | -12.048717 | -5.107073 |
| 1L9L | A | CYS | 70 | H | -6.922375  | 8.803953  | -10.426968 | -4.689928 |
| 1L9L | A | GLU | 71 | G | -5.179519  | 7.702843  | -7.307648  | -3.517674 |
| 1L9L | A | ASP | 72 | G | -5.179519  | 7.702843  | -7.307648  | -3.517674 |
| 1L9L | A | LEU | 73 | G | -5.179519  | 7.702843  | -7.307648  | -3.517674 |
| 1L9L | A | ARG | 74 | C | -5.179519  | 7.702843  | -7.307648  | -3.517674 |
| 1LCL | A | SER | 2  | C | -6.104190  | 6.415938  | -9.310967  | -3.265954 |
| 1LCL | A | LEU | 3  | C | -6.104190  | 6.415938  | -9.310967  | -3.265954 |
| 1LCL | A | LEU | 4  | B | -6.104190  | 6.415938  | -9.310967  | -3.265954 |
| 1LCL | A | PRO | 5  | T | -6.104190  | 6.415938  | -9.310967  | -3.265954 |
| 1LCL | A | VAL | 6  | T | -6.830250  | 8.885040  | -9.662088  | -3.871428 |
| 1LCL | A | PRO | 7  | T | -7.255284  | 9.595478  | -9.841979  | -4.198582 |
| 1LCL | A | TYR | 8  | E | -9.116672  | 12.990395 | -12.072334 | -4.838867 |
| 1LCL | A | THR | 9  | E | -8.999224  | 12.046960 | -12.331158 | -4.691974 |
| 1LCL | A | GLU | 10 | E | -8.995299  | 11.933822 | -12.321263 | -4.633046 |
| 1LCL | A | ALA | 11 | E | -9.069510  | 11.561851 | -12.480747 | -4.617079 |
| 1LCL | A | ALA | 12 | C | -9.443527  | 10.553140 | -13.289069 | -4.451036 |
| 1LCL | A | SER | 13 | C | -9.397901  | 9.998296  | -13.570941 | -4.497402 |
| 1LCL | A | LEU | 14 | C | -9.619231  | 11.000867 | -13.698307 | -4.753827 |
| 1LCL | A | SER | 15 | T | -9.323586  | 10.329990 | -14.224317 | -5.178042 |
| 1LCL | A | THR | 16 | T | -9.187970  | 10.590560 | -14.108308 | -5.251252 |
| 1LCL | A | GLY | 17 | T | -9.054382  | 10.641307 | -14.059083 | -5.295408 |
| 1LCL | A | SER | 18 | E | -9.189737  | 10.679970 | -14.205426 | -5.406144 |
| 1LCL | A | THR | 19 | E | -9.241048  | 10.637467 | -14.206461 | -5.429249 |
| 1LCL | A | VAL | 20 | E | -9.482470  | 11.585617 | -13.746116 | -5.295486 |
| 1LCL | A | THR | 21 | E | -9.785937  | 11.672741 | -13.795058 | -5.296678 |
| 1LCL | A | ILE | 22 | E | -10.731699 | 14.450570 | -13.726772 | -5.203134 |
| 1LCL | A | LYS | 23 | E | -10.717783 | 13.996054 | -13.959358 | -5.200109 |
| 1LCL | A | GLY | 24 | E | -9.161186  | 9.989629  | -11.963405 | -4.043174 |

|      |   |     |     |   |            |           |            |           |
|------|---|-----|-----|---|------------|-----------|------------|-----------|
| 1LCL | A | ARG | 25  | E | -8.786596  | 9.645500  | -11.895019 | -3.949091 |
| 1LCL | A | PRO | 26  | E | -8.546579  | 10.891313 | -11.256538 | -3.974673 |
| 1LCL | A | LEU | 27  | C | -8.253916  | 10.629561 | -11.250439 | -4.023141 |
| 1LCL | A | VAL | 28  | C | -7.371931  | 8.992099  | -10.708479 | -4.121945 |
| 1LCL | A | CYS | 29  | C | -6.922155  | 9.233784  | -10.683073 | -4.558121 |
| 1LCL | A | PHE | 30  | G | -6.911745  | 9.318709  | -10.692122 | -4.584097 |
| 1LCL | A | LEU | 31  | G | -6.877577  | 9.316536  | -10.802897 | -4.635704 |
| 1LCL | A | ASN | 32  | G | -6.899952  | 9.288202  | -10.787568 | -4.657870 |
| 1LCL | A | GLU | 33  | C | -7.154592  | 9.702319  | -10.912950 | -4.929844 |
| 1LCL | A | PRO | 34  | C | -8.167952  | 10.810514 | -11.850021 | -5.045956 |
| 1LCL | A | TYR | 35  | E | -8.395194  | 10.440459 | -11.977270 | -5.121334 |
| 1LCL | A | LEU | 36  | E | -10.856013 | 15.634920 | -12.733663 | -5.369811 |
| 1LCL | A | GLN | 37  | E | -13.396763 | 17.671213 | -15.899627 | -5.671332 |
| 1LCL | A | VAL | 38  | E | -13.711407 | 17.966553 | -15.600021 | -5.231320 |
| 1LCL | A | ASP | 39  | E | -13.987492 | 16.400186 | -17.401113 | -5.607210 |
| 1LCL | A | PHE | 40  | E | -12.938443 | 16.209600 | -16.224290 | -5.934157 |
| 1LCL | A | HIS | 41  | E | -10.146006 | 11.309358 | -15.087885 | -6.155783 |
| 1LCL | A | THR | 42  | C | -8.303565  | 9.513032  | -13.597617 | -6.030842 |
| 1LCL | A | GLU | 43  | C | -6.996058  | 7.162720  | -12.897711 | -5.726001 |
| 1LCL | A | MET | 44  | C | -6.770460  | 6.935271  | -13.015555 | -5.648944 |
| 1LCL | A | LYS | 45  | T | -6.763142  | 6.922111  | -13.054535 | -5.648373 |
| 1LCL | A | GLU | 46  | T | -6.764697  | 6.909024  | -13.050465 | -5.646690 |
| 1LCL | A | GLU | 47  | T | -6.808389  | 6.716307  | -13.014105 | -5.617678 |
| 1LCL | A | SER | 48  | T | -7.427592  | 6.429089  | -13.388146 | -5.487406 |
| 1LCL | A | ASP | 49  | C | -9.334712  | 6.064143  | -16.231042 | -5.603161 |
| 1LCL | A | ILE | 50  | E | -11.038678 | 9.159479  | -16.899994 | -5.600976 |
| 1LCL | A | VAL | 51  | E | -12.413480 | 12.951266 | -16.370615 | -5.238135 |
| 1LCL | A | PHE | 52  | E | -13.535229 | 19.550074 | -14.682639 | -5.080311 |
| 1LCL | A | HIS | 53  | E | -13.687179 | 20.547211 | -14.492871 | -5.195340 |
| 1LCL | A | PHE | 54  | E | -13.891132 | 21.312455 | -14.374469 | -5.282196 |
| 1LCL | A | GLN | 55  | E | -12.388868 | 14.784048 | -15.599386 | -5.653824 |
| 1LCL | A | VAL | 56  | E | -11.482870 | 13.759115 | -14.626332 | -5.166313 |
| 1LCL | A | CYS | 57  | E | -11.429877 | 13.782029 | -14.794759 | -5.217692 |
| 1LCL | A | PHE | 58  | T | -11.420198 | 13.820570 | -14.811280 | -5.220040 |
| 1LCL | A | GLY | 59  | T | -11.363405 | 13.629447 | -15.012007 | -5.222854 |
| 1LCL | A | ARG | 60  | T | -11.474567 | 13.420271 | -14.900767 | -5.134222 |
| 1LCL | A | ARG | 61  | E | -12.348551 | 13.214458 | -16.768400 | -5.484261 |
| 1LCL | A | VAL | 62  | E | -12.569313 | 12.820927 | -16.955094 | -5.323908 |
| 1LCL | A | VAL | 63  | E | -12.656028 | 12.263863 | -17.098389 | -5.307526 |
| 1LCL | A | MET | 64  | E | -13.666599 | 14.278109 | -17.545682 | -5.551276 |
| 1LCL | A | ASN | 65  | E | -13.599909 | 13.991123 | -17.968549 | -5.659233 |
| 1LCL | A | SER | 66  | E | -11.645895 | 9.381309  | -17.781639 | -5.891774 |
| 1LCL | A | ARG | 67  | E | -9.259250  | 7.598003  | -14.925228 | -5.379818 |
| 1LCL | A | GLU | 68  | E | -6.232775  | 8.925503  | -10.478748 | -5.527909 |
| 1LCL | A | TYR | 69  | T | -5.884457  | 8.505086  | -10.565987 | -5.374696 |
| 1LCL | A | GLY | 70  | T | -5.851763  | 8.423728  | -10.691640 | -5.370180 |
| 1LCL | A | ALA | 71  | E | -5.850870  | 8.424631  | -10.697783 | -5.370446 |
| 1LCL | A | TRP | 72  | E | -5.852085  | 8.428624  | -10.689294 | -5.370749 |
| 1LCL | A | LYS | 73  | C | -6.279041  | 7.879616  | -11.007570 | -5.204537 |
| 1LCL | A | GLN | 74  | C | -7.432530  | 7.286599  | -13.215982 | -5.344248 |
| 1LCL | A | GLN | 75  | C | -8.239505  | 8.357764  | -14.316586 | -5.516162 |
| 1LCL | A | VAL | 76  | E | -8.166446  | 8.171784  | -14.322606 | -5.472261 |
| 1LCL | A | GLU | 77  | E | -8.141797  | 8.210010  | -14.326712 | -5.485604 |
| 1LCL | A | SER | 78  | E | -8.471555  | 8.306368  | -14.588372 | -5.407076 |
| 1LCL | A | LYS | 79  | C | -8.694092  | 8.456154  | -14.651504 | -5.425090 |
| 1LCL | A | ASN | 80  | C | -8.854216  | 8.461260  | -14.643870 | -5.424815 |
| 1LCL | A | MET | 81  | C | -9.310575  | 10.741041 | -14.245845 | -5.533005 |
| 1LCL | A | PRO | 82  | C | -9.423105  | 13.303461 | -12.576387 | -5.103734 |
| 1LCL | A | PHE | 83  | C | -9.169671  | 12.467075 | -12.781070 | -5.149523 |
| 1LCL | A | GLN | 84  | T | -8.100819  | 7.623167  | -14.058714 | -5.558445 |
| 1LCL | A | ASP | 85  | T | -8.089962  | 7.695973  | -14.070137 | -5.567909 |
| 1LCL | A | GLY | 86  | T | -8.103129  | 7.522080  | -14.122794 | -5.578053 |
| 1LCL | A | GLN | 87  | T | -8.141989  | 7.131491  | -14.262971 | -5.613407 |
| 1LCL | A | GLU | 88  | C | -8.188711  | 6.848932  | -14.316354 | -5.645543 |
| 1LCL | A | PHE | 89  | E | -10.310149 | 12.289797 | -14.521670 | -5.909352 |
| 1LCL | A | GLU | 90  | E | -12.272842 | 14.992444 | -16.392516 | -5.879160 |
| 1LCL | A | LEU | 91  | E | -12.324847 | 16.454852 | -14.515057 | -4.946481 |
| 1LCL | A | SER | 92  | E | -11.806275 | 15.409659 | -13.854131 | -4.618157 |
| 1LCL | A | ILE | 93  | E | -10.409018 | 13.706111 | -11.817082 | -4.131892 |
| 1LCL | A | SER | 94  | E | -9.116405  | 9.839513  | -12.456499 | -4.340746 |
| 1LCL | A | VAL | 95  | E | -7.339995  | 10.433314 | -10.077114 | -4.619459 |
| 1LCL | A | LEU | 96  | T | -7.324225  | 10.504896 | -10.128921 | -4.636450 |
| 1LCL | A | PRO | 97  | T | -7.323621  | 10.508992 | -10.133714 | -4.638320 |
| 1LCL | A | ASP | 98  | T | -7.326562  | 10.493970 | -10.126425 | -4.641103 |
| 1LCL | A | LYS | 99  | E | -7.352765  | 10.545720 | -10.017372 | -4.653477 |
| 1LCL | A | TYR | 100 | E | -9.448656  | 13.242125 | -12.177398 | -5.299190 |
| 1LCL | A | GLN | 101 | E | -11.223948 | 14.606871 | -14.609963 | -5.984347 |
| 1LCL | A | VAL | 102 | E | -10.647153 | 10.408192 | -14.569923 | -4.870760 |
| 1LCL | A | MET | 103 | E | -9.339249  | 8.027771  | -14.724696 | -5.164094 |
| 1LCL | A | VAL | 104 | E | -7.991670  | 7.261666  | -13.164609 | -4.977697 |
| 1LCL | A | ASN | 105 | T | -7.913792  | 7.043856  | -13.508922 | -5.039491 |

|      |   |     |     |   |            |           |            |           |
|------|---|-----|-----|---|------------|-----------|------------|-----------|
| 1LCL | A | GLY | 106 | T | -7.911657  | 7.054265  | -13.519585 | -5.041716 |
| 1LCL | A | GLN | 107 | E | -7.916286  | 7.031864  | -13.514108 | -5.044601 |
| 1LCL | A | SER | 108 | E | -7.966055  | 6.970718  | -13.406362 | -5.030966 |
| 1LCL | A | SER | 109 | E | -9.119456  | 5.877260  | -15.943289 | -5.490717 |
| 1LCL | A | TYR | 110 | E | -10.775112 | 12.551214 | -15.548594 | -5.682701 |
| 1LCL | A | THR | 111 | E | -10.921532 | 14.890971 | -14.578799 | -5.688899 |
| 1LCL | A | PHE | 112 | E | -11.035129 | 16.109795 | -14.036782 | -5.660148 |
| 1LCL | A | ASP | 113 | E | -8.919078  | 12.092242 | -11.773037 | -5.067277 |
| 1LCL | A | HIS | 114 | T | -8.847525  | 12.199081 | -11.792640 | -5.017090 |
| 1LCL | A | ARG | 115 | T | -8.784442  | 12.191382 | -11.875098 | -4.981105 |
| 1LCL | A | ILE | 116 | T | -7.141047  | 10.015701 | -9.237831  | -3.961677 |
| 1LCL | A | LYS | 117 | T | -6.761982  | 10.341587 | -8.902795  | -3.881954 |
| 1LCL | A | PRO | 118 | G | -6.773525  | 10.307174 | -8.849067  | -3.853919 |
| 1LCL | A | GLU | 119 | G | -6.775518  | 10.296576 | -8.839267  | -3.851149 |
| 1LCL | A | ALA | 120 | G | -6.777549  | 10.289917 | -8.826357  | -3.848275 |
| 1LCL | A | VAL | 121 | C | -7.197699  | 10.719298 | -8.579851  | -3.800239 |
| 1LCL | A | LYS | 122 | C | -9.737436  | 11.638054 | -12.132603 | -4.294213 |
| 1LCL | A | MET | 123 | E | -11.431181 | 11.785885 | -15.213214 | -4.951694 |
| 1LCL | A | VAL | 124 | E | -12.621795 | 13.586313 | -14.892085 | -4.393379 |
| 1LCL | A | GLN | 125 | E | -14.504321 | 15.242986 | -18.965602 | -5.570094 |
| 1LCL | A | VAL | 126 | E | -12.767834 | 17.334816 | -13.889144 | -4.960347 |
| 1LCL | A | TRP | 127 | E | -12.673264 | 17.158018 | -14.213493 | -5.036831 |
| 1LCL | A | ARG | 128 | E | -12.391259 | 16.972789 | -14.292104 | -5.047602 |
| 1LCL | A | ASP | 129 | T | -11.749793 | 15.808772 | -14.013596 | -5.014576 |
| 1LCL | A | ILE | 130 | E | -11.587148 | 15.768973 | -14.168002 | -5.100184 |
| 1LCL | A | SER | 131 | E | -11.637180 | 15.652576 | -14.304229 | -5.164094 |
| 1LCL | A | LEU | 132 | E | -11.330027 | 15.806066 | -14.190223 | -5.369563 |
| 1LCL | A | THR | 133 | E | -10.545075 | 15.405404 | -13.083318 | -5.406989 |
| 1LCL | A | LYS | 134 | E | -10.539763 | 15.369863 | -13.124167 | -5.420648 |
| 1LCL | A | PHE | 135 | E | -10.562380 | 15.363186 | -13.079558 | -5.431177 |
| 1LCL | A | ASN | 136 | E | -10.361793 | 13.810665 | -14.259165 | -5.701770 |
| 1LCL | A | VAL | 137 | E | -9.488425  | 10.006699 | -14.343069 | -5.320786 |
| 1LCL | A | SER | 138 | E | -8.043431  | 6.739735  | -12.964889 | -4.598901 |
| 1LCL | A | TYR | 139 | C | -6.366084  | 5.677430  | -10.146383 | -3.688000 |
| 1LCL | A | LEU | 140 | C | -6.366084  | 5.677430  | -10.146383 | -3.688000 |
| 1LCL | A | LYS | 141 | C | -6.366084  | 5.677430  | -10.146383 | -3.688000 |
| 1LCL | A | ARG | 142 | C | -6.366084  | 5.677430  | -10.146383 | -3.688000 |
| 1LDS | A | MET | 0   | C | -5.031051  | 5.933665  | -7.499339  | -3.165858 |
| 1LDS | A | ILE | 1   | C | -5.031051  | 5.933665  | -7.499339  | -3.165858 |
| 1LDS | A | GLN | 2   | C | -5.031051  | 5.933665  | -7.499339  | -3.165858 |
| 1LDS | A | ARG | 3   | B | -5.031051  | 5.933665  | -7.499339  | -3.165858 |
| 1LDS | A | THR | 4   | C | -6.338502  | 7.462728  | -9.666114  | -4.129636 |
| 1LDS | A | PRO | 5   | C | -7.708690  | 11.511634 | -10.212937 | -4.430182 |
| 1LDS | A | LYS | 6   | E | -8.089568  | 12.328237 | -9.988721  | -4.319774 |
| 1LDS | A | ILE | 7   | E | -8.109760  | 12.353093 | -9.853856  | -4.270759 |
| 1LDS | A | GLN | 8   | E | -8.115576  | 12.316420 | -9.817053  | -4.247528 |
| 1LDS | A | VAL | 9   | E | -8.612179  | 13.597018 | -9.372654  | -4.213097 |
| 1LDS | A | TYR | 10  | E | -9.764677  | 11.335268 | -16.365535 | -7.206236 |
| 1LDS | A | SER | 11  | E | -6.844158  | 7.874660  | -14.013952 | -7.226070 |
| 1LDS | A | ARG | 12  | E | -5.557948  | 5.935583  | -9.166553  | -3.875836 |
| 1LDS | A | HIS | 13  | C | -3.721008  | 4.813383  | -6.982613  | -3.776440 |
| 1LDS | A | PRO | 14  | T | -2.125969  | 3.408762  | -5.912852  | -3.870808 |
| 1LDS | A | ALA | 15  | T | -1.393613  | 1.806329  | -6.532263  | -4.036854 |
| 1LDS | A | GLU | 16  | T | -1.365840  | 1.857626  | -6.640861  | -4.067983 |
| 1LDS | A | ASN | 17  | T | -1.366290  | 1.854396  | -6.639234  | -4.068236 |
| 1LDS | A | GLY | 18  | T | -1.379231  | 1.783281  | -6.608069  | -4.058888 |
| 1LDS | A | LYS | 19  | T | -1.591396  | 1.072956  | -6.581405  | -3.921782 |
| 1LDS | A | SER | 20  | T | -3.297229  | 2.634380  | -7.799344  | -4.026878 |
| 1LDS | A | ASN | 21  | C | -6.663824  | 5.543674  | -13.591427 | -5.896494 |
| 1LDS | A | PHE | 22  | E | -8.291960  | 10.555246 | -15.527846 | -8.227974 |
| 1LDS | A | LEU | 23  | E | -11.680428 | 15.000311 | -17.429854 | -7.861402 |
| 1LDS | A | ASN | 24  | E | -13.520351 | 14.991865 | -17.164113 | -5.412651 |
| 1LDS | A | CYS | 25  | E | -11.775186 | 11.312123 | -15.852237 | -5.118992 |
| 1LDS | A | TYR | 26  | E | -11.712348 | 11.788243 | -15.675519 | -5.082024 |
| 1LDS | A | VAL | 27  | E | -11.480119 | 12.911942 | -14.883131 | -4.929093 |
| 1LDS | A | SER | 28  | E | -11.297283 | 13.119948 | -14.608847 | -4.845506 |
| 1LDS | A | GLY | 29  | E | -11.070792 | 13.521580 | -14.154459 | -4.753569 |
| 1LDS | A | PHE | 30  | E | -10.455137 | 13.562039 | -12.512200 | -4.417515 |
| 1LDS | A | HIS | 31  | B | -7.360932  | 11.410101 | -8.149469  | -3.822971 |
| 1LDS | A | PRO | 32  | T | -6.763528  | 10.403193 | -8.443393  | -3.878648 |
| 1LDS | A | SER | 33  | T | -6.340232  | 10.590854 | -8.074171  | -3.886623 |
| 1LDS | A | ASP | 34  | C | -6.333825  | 10.583773 | -8.115347  | -3.893056 |
| 1LDS | A | ILE | 35  | C | -6.333453  | 10.586876 | -8.117101  | -3.893811 |
| 1LDS | A | GLU | 36  | E | -6.447840  | 10.414082 | -8.115349  | -3.909583 |
| 1LDS | A | VAL | 37  | E | -6.724286  | 10.763972 | -7.819518  | -3.908883 |
| 1LDS | A | ASP | 38  | E | -8.941501  | 10.478175 | -11.887904 | -4.510791 |
| 1LDS | A | LEU | 39  | E | -10.068938 | 14.019545 | -12.183604 | -4.831625 |
| 1LDS | A | LEU | 40  | E | -7.633524  | 8.090802  | -12.013598 | -5.088440 |
| 1LDS | A | LYS | 41  | E | -7.527733  | 7.802874  | -12.366430 | -5.106249 |
| 1LDS | A | ASN | 42  | T | -7.522411  | 7.795214  | -12.394608 | -5.103607 |
| 1LDS | A | GLY | 43  | T | -7.368043  | 7.466062  | -12.390689 | -4.896659 |

|      |   |     |    |   |            |           |            |           |
|------|---|-----|----|---|------------|-----------|------------|-----------|
| 1LDS | A | GLU | 44 | E | -7.310295  | 7.316056  | -12.469676 | -4.830999 |
| 1LDS | A | ARG | 45 | E | -7.416017  | 7.361643  | -12.028298 | -4.348989 |
| 1LDS | A | ILE | 46 | T | -6.707946  | 7.828272  | -10.445634 | -4.305740 |
| 1LDS | A | GLU | 47 | T | -6.511631  | 7.462460  | -10.662678 | -4.325282 |
| 1LDS | A | LYS | 48 | T | -6.445420  | 7.685075  | -10.516755 | -4.302843 |
| 1LDS | A | VAL | 49 | T | -6.425595  | 7.778187  | -10.500461 | -4.307860 |
| 1LDS | A | GLU | 50 | C | -6.417192  | 7.809205  | -10.544529 | -4.353796 |
| 1LDS | A | HIS | 51 | E | -6.759825  | 7.715908  | -11.015597 | -4.358079 |
| 1LDS | A | SER | 52 | E | -7.025143  | 8.656672  | -10.814051 | -4.282163 |
| 1LDS | A | ASP | 53 | E | -7.310207  | 8.691872  | -11.247168 | -4.355243 |
| 1LDS | A | LEU | 54 | E | -7.163449  | 8.698100  | -10.773614 | -4.165299 |
| 1LDS | A | SER | 55 | E | -6.812392  | 7.266454  | -10.711180 | -4.027917 |
| 1LDS | A | PHE | 56 | E | -5.427019  | 7.632604  | -8.391815  | -4.181216 |
| 1LDS | A | SER | 57 | T | -5.353636  | 7.519273  | -8.582110  | -4.188777 |
| 1LDS | A | LYS | 58 | T | -5.351573  | 7.540793  | -8.585376  | -4.191863 |
| 1LDS | A | ASP | 59 | T | -5.363039  | 7.517544  | -8.555605  | -4.197713 |
| 1LDS | A | TRP | 60 | T | -5.397542  | 7.578834  | -8.418478  | -4.202833 |
| 1LDS | A | SER | 61 | T | -6.570810  | 6.988941  | -10.065337 | -4.239033 |
| 1LDS | A | PHE | 62 | E | -8.474734  | 11.883363 | -10.380748 | -4.672411 |
| 1LDS | A | TYR | 63 | E | -12.653448 | 17.481420 | -15.052678 | -6.037851 |
| 1LDS | A | LEU | 64 | E | -14.840899 | 20.374189 | -16.696184 | -6.027493 |
| 1LDS | A | LEU | 65 | E | -14.939767 | 19.133947 | -16.854531 | -5.672713 |
| 1LDS | A | TYR | 66 | E | -14.743359 | 20.182176 | -16.395869 | -5.817195 |
| 1LDS | A | TYR | 67 | E | -10.065944 | 16.663391 | -10.326468 | -4.976650 |
| 1LDS | A | THR | 68 | E | -7.564089  | 13.825001 | -7.821433  | -4.343533 |
| 1LDS | A | GLU | 69 | E | -6.979477  | 12.659880 | -8.185131  | -4.333566 |
| 1LDS | A | PHE | 70 | C | -6.028674  | 10.866526 | -7.782910  | -4.200208 |
| 1LDS | A | THR | 71 | C | -3.420243  | 4.930515  | -6.041793  | -3.457357 |
| 1LDS | A | PRO | 72 | C | -3.282199  | 5.115349  | -6.291586  | -3.571420 |
| 1LDS | A | THR | 73 | T | -3.270249  | 5.103971  | -6.372323  | -3.591686 |
| 1LDS | A | GLU | 74 | T | -3.270948  | 5.095785  | -6.370009  | -3.590817 |
| 1LDS | A | LYS | 75 | T | -3.275508  | 5.054386  | -6.359494  | -3.586151 |
| 1LDS | A | ASP | 76 | T | -4.159284  | 5.702226  | -7.484026  | -4.037692 |
| 1LDS | A | GLU | 77 | C | -5.572236  | 4.831459  | -10.205050 | -4.552214 |
| 1LDS | A | TYR | 78 | E | -9.464195  | 10.923210 | -13.515011 | -5.519635 |
| 1LDS | A | ALA | 79 | E | -11.567585 | 14.751570 | -16.061090 | -6.400775 |
| 1LDS | A | CYS | 80 | E | -12.623369 | 15.623172 | -18.067793 | -7.277351 |
| 1LDS | A | ARG | 81 | E | -12.672004 | 13.097145 | -15.836541 | -4.653608 |
| 1LDS | A | VAL | 82 | E | -9.672063  | 11.738168 | -11.842674 | -4.508774 |
| 1LDS | A | ASN | 83 | E | -8.981423  | 11.616523 | -11.757768 | -4.722437 |
| 1LDS | A | HIS | 84 | E | -7.246267  | 10.334653 | -9.354690  | -4.269378 |
| 1LDS | A | VAL | 85 | T | -5.937908  | 8.330849  | -8.609608  | -4.044007 |
| 1LDS | A | THR | 86 | T | -5.736375  | 8.230226  | -8.670782  | -3.988910 |
| 1LDS | A | LEU | 87 | E | -5.724503  | 8.204812  | -8.715766  | -3.982467 |
| 1LDS | A | SER | 88 | E | -5.461031  | 8.129653  | -8.426425  | -3.842352 |
| 1LDS | A | GLN | 89 | E | -5.489136  | 8.027155  | -8.388652  | -3.823273 |
| 1LDS | A | PRO | 90 | E | -5.805779  | 8.031791  | -8.307717  | -3.696989 |
| 1LDS | A | LYS | 91 | E | -6.017646  | 8.248008  | -8.093422  | -3.662381 |
| 1LDS | A | ILE | 92 | E | -5.359499  | 10.428681 | -6.326791  | -3.642544 |
| 1LDS | A | VAL | 93 | E | -5.139897  | 10.270325 | -5.759903  | -3.324356 |
| 1LDS | A | LYS | 94 | E | -5.139897  | 10.270325 | -5.759903  | -3.324356 |
| 1LDS | A | TRP | 95 | C | -5.139897  | 10.270325 | -5.759903  | -3.324356 |
| 1LDS | A | ASP | 96 | C | -5.139897  | 10.270325 | -5.759903  | -3.324356 |
| 1LN1 | A | PHE | 8  | C | -10.805145 | 8.202169  | -15.167843 | -4.408019 |
| 1LN1 | A | SER | 9  | C | -10.805145 | 8.202169  | -15.167843 | -4.408019 |
| 1LN1 | A | GLU | 10 | H | -10.805145 | 8.202169  | -15.167843 | -4.408019 |
| 1LN1 | A | GLU | 11 | H | -10.805145 | 8.202169  | -15.167843 | -4.408019 |
| 1LN1 | A | GLN | 12 | H | -12.520591 | 9.613851  | -17.959652 | -5.421201 |
| 1LN1 | A | PHE | 13 | H | -13.369338 | 15.318422 | -15.850583 | -5.029199 |
| 1LN1 | A | TRP | 14 | H | -10.968442 | 10.004899 | -14.441925 | -4.500860 |
| 1LN1 | A | GLU | 15 | H | -10.580672 | 9.132708  | -15.033040 | -4.593053 |
| 1LN1 | A | ALA | 16 | H | -10.514261 | 9.478086  | -15.011329 | -4.615927 |
| 1LN1 | A | CYS | 17 | H | -10.297110 | 9.792684  | -14.957133 | -4.739571 |
| 1LN1 | A | ALA | 18 | H | -9.770876  | 9.846007  | -14.215489 | -4.733013 |
| 1LN1 | A | GLU | 19 | H | -9.364494  | 10.425550 | -13.231062 | -4.674159 |
| 1LN1 | A | LEU | 20 | H | -7.982882  | 8.450946  | -11.103534 | -4.019143 |
| 1LN1 | A | GLN | 21 | H | -7.500287  | 8.145127  | -11.226811 | -4.118988 |
| 1LN1 | A | GLN | 22 | C | -6.609609  | 7.245541  | -9.515818  | -3.483115 |
| 1LN1 | A | PRO | 23 | C | -4.815537  | 5.940065  | -7.330557  | -3.401426 |
| 1LN1 | A | ALA | 24 | C | -4.078298  | 5.563123  | -6.881852  | -3.370975 |
| 1LN1 | A | LEU | 25 | T | -3.478678  | 5.722661  | -6.533241  | -3.603176 |
| 1LN1 | A | ALA | 26 | T | -3.452059  | 5.890255  | -6.578686  | -3.645580 |
| 1LN1 | A | GLY | 27 | T | -3.452578  | 5.898144  | -6.576905  | -3.649340 |
| 1LN1 | A | ALA | 28 | T | -3.512182  | 5.899008  | -6.505674  | -3.674211 |
| 1LN1 | A | ASP | 29 | C | -3.702448  | 6.076951  | -6.424249  | -3.788999 |
| 1LN1 | A | TRP | 30 | C | -5.258366  | 9.541567  | -7.690340  | -4.541658 |
| 1LN1 | A | GLN | 31 | E | -6.760629  | 10.692974 | -9.227897  | -4.517576 |
| 1LN1 | A | LEU | 32 | E | -7.097046  | 13.224556 | -8.238880  | -4.282734 |
| 1LN1 | A | LEU | 33 | E | -7.124068  | 13.113299 | -8.191425  | -4.236003 |
| 1LN1 | A | VAL | 34 | E | -6.289607  | 9.128813  | -8.870005  | -4.102027 |
| 1LN1 | A | GLU | 35 | E | -5.136716  | 9.182259  | -7.325063  | -4.203793 |

|      |   |     |     |   |            |           |            |           |
|------|---|-----|-----|---|------------|-----------|------------|-----------|
| 1LN1 | A | THR | 36  | E | -5.139203  | 9.152003  | -7.327735  | -4.202218 |
| 1LN1 | A | SER | 37  | T | -5.152293  | 9.056506  | -7.325779  | -4.205149 |
| 1LN1 | A | GLY | 38  | T | -5.153144  | 9.052195  | -7.321657  | -4.205232 |
| 1LN1 | A | ILE | 39  | E | -5.223393  | 9.197192  | -7.098021  | -4.222679 |
| 1LN1 | A | SER | 40  | E | -8.099182  | 9.914040  | -10.987521 | -4.479993 |
| 1LN1 | A | ILE | 41  | E | -10.204205 | 13.763558 | -11.431490 | -4.107918 |
| 1LN1 | A | TYR | 42  | E | -10.782916 | 17.743242 | -11.200544 | -4.999163 |
| 1LN1 | A | ARG | 43  | E | -9.325824  | 13.500829 | -13.163967 | -6.186829 |
| 1LN1 | A | LEU | 44  | E | -4.996167  | 6.927866  | -7.173230  | -3.615290 |
| 1LN1 | A | LEU | 45  | E | -2.826152  | 4.082718  | -5.865925  | -3.522741 |
| 1LN1 | A | ASP | 46  | E | -1.430443  | 2.739987  | -5.856241  | -4.090133 |
| 1LN1 | A | LYS | 47  | T | -1.372591  | 3.000633  | -5.929210  | -4.127428 |
| 1LN1 | A | LYS | 48  | T | -1.372406  | 3.003047  | -5.930240  | -4.127766 |
| 1LN1 | A | THR | 49  | T | -1.373978  | 2.991301  | -5.924187  | -4.127214 |
| 1LN1 | A | GLY | 50  | T | -1.436115  | 2.827807  | -5.828954  | -4.119748 |
| 1LN1 | A | LEU | 51  | E | -2.879487  | 5.105240  | -5.680787  | -3.816989 |
| 1LN1 | A | TYR | 52  | E | -6.240214  | 10.357802 | -8.324507  | -4.587977 |
| 1LN1 | A | GLU | 53  | E | -8.261474  | 15.695271 | -12.742885 | -8.007674 |
| 1LN1 | A | TYR | 54  | E | -11.078307 | 18.307898 | -15.891942 | -8.787144 |
| 1LN1 | A | LYS | 55  | E | -11.973455 | 15.487857 | -13.353660 | -4.750535 |
| 1LN1 | A | VAL | 56  | E | -11.685452 | 15.678563 | -13.144033 | -4.601546 |
| 1LN1 | A | PHE | 57  | E | -10.623680 | 14.788349 | -12.023418 | -4.610762 |
| 1LN1 | A | GLY | 58  | E | -8.175889  | 10.122316 | -10.817927 | -4.539168 |
| 1LN1 | A | VAL | 59  | E | -8.007095  | 10.159305 | -11.075293 | -4.589673 |
| 1LN1 | A | LEU | 60  | E | -7.911118  | 10.292568 | -11.224055 | -4.657989 |
| 1LN1 | A | GLU | 61  | T | -7.688331  | 10.202930 | -11.443062 | -4.783127 |
| 1LN1 | A | ASP | 62  | T | -7.665502  | 10.083744 | -11.529471 | -4.768860 |
| 1LN1 | A | CYS | 63  | T | -7.890218  | 9.912259  | -12.040314 | -4.809691 |
| 1LN1 | A | SER | 64  | C | -7.991601  | 9.951762  | -12.020708 | -4.778675 |
| 1LN1 | A | PRO | 65  | H | -8.088293  | 9.835451  | -11.975687 | -4.707860 |
| 1LN1 | A | THR | 66  | H | -8.637645  | 9.635722  | -12.099168 | -4.169764 |
| 1LN1 | A | LEU | 67  | H | -8.787468  | 10.103549 | -11.703082 | -4.094233 |
| 1LN1 | A | LEU | 68  | H | -9.435716  | 12.782051 | -11.143819 | -4.104046 |
| 1LN1 | A | ALA | 69  | H | -10.022670 | 13.734074 | -11.597159 | -4.361605 |
| 1LN1 | A | ASP | 70  | H | -10.685895 | 12.539994 | -13.412009 | -4.861784 |
| 1LN1 | A | ILE | 71  | H | -12.858846 | 15.356635 | -14.306952 | -4.583479 |
| 1LN1 | A | TYR | 72  | H | -14.533664 | 16.793285 | -17.372742 | -5.423103 |
| 1LN1 | A | MET | 73  | H | -14.611736 | 12.231240 | -20.738248 | -6.037898 |
| 1LN1 | A | ASP | 74  | C | -14.630184 | 11.763235 | -21.034744 | -6.074885 |
| 1LN1 | A | SER | 75  | H | -14.667153 | 11.544276 | -21.108680 | -6.068923 |
| 1LN1 | A | ASP | 76  | H | -14.076712 | 12.307388 | -19.748396 | -5.851447 |
| 1LN1 | A | TYR | 77  | H | -14.093113 | 12.381157 | -19.643002 | -5.828490 |
| 1LN1 | A | ARG | 78  | H | -14.148322 | 13.403400 | -19.009119 | -5.724024 |
| 1LN1 | A | LYS | 79  | H | -12.751040 | 12.332255 | -17.005068 | -5.494245 |
| 1LN1 | A | GLN | 80  | H | -12.537127 | 13.114945 | -16.682176 | -5.476444 |
| 1LN1 | A | TRP | 81  | H | -12.313475 | 14.512079 | -15.873927 | -5.458620 |
| 1LN1 | A | ASP | 82  | T | -11.686580 | 13.664653 | -15.313769 | -5.374645 |
| 1LN1 | A | GLN | 83  | T | -11.295902 | 13.768755 | -14.850930 | -5.358278 |
| 1LN1 | A | TYR | 84  | T | -10.949791 | 15.816415 | -13.381955 | -5.404542 |
| 1LN1 | A | VAL | 85  | E | -10.437563 | 15.664306 | -12.678165 | -5.334975 |
| 1LN1 | A | LYS | 86  | E | -10.193950 | 15.379324 | -13.128728 | -5.646088 |
| 1LN1 | A | GLU | 87  | E | -10.222148 | 15.488738 | -13.050201 | -5.665342 |
| 1LN1 | A | LEU | 88  | E | -10.264199 | 15.586664 | -12.992354 | -5.696766 |
| 1LN1 | A | TYR | 89  | E | -10.348718 | 15.086602 | -13.334260 | -5.780588 |
| 1LN1 | A | GLU | 90  | E | -9.606964  | 7.211395  | -16.074699 | -5.703287 |
| 1LN1 | A | GLN | 91  | E | -7.127695  | 3.482095  | -14.237785 | -5.386060 |
| 1LN1 | A | GLU | 92  | E | -4.853997  | 2.862634  | -10.745637 | -4.801600 |
| 1LN1 | A | CYS | 93  | E | -4.686111  | 3.134397  | -10.814970 | -4.825337 |
| 1LN1 | A | ASN | 94  | T | -4.682952  | 3.153681  | -10.822500 | -4.824651 |
| 1LN1 | A | GLY | 95  | T | -4.682993  | 3.154042  | -10.821682 | -4.824453 |
| 1LN1 | A | GLU | 96  | E | -4.692514  | 3.149257  | -10.766682 | -4.815350 |
| 1LN1 | A | THR | 97  | E | -5.502504  | 4.025143  | -11.047563 | -4.890722 |
| 1LN1 | A | VAL | 98  | E | -7.770248  | 6.841945  | -12.252794 | -4.690990 |
| 1LN1 | A | VAL | 99  | E | -9.932350  | 9.924507  | -13.273874 | -4.591815 |
| 1LN1 | A | TYR | 100 | E | -14.576708 | 16.899326 | -17.284420 | -5.480137 |
| 1LN1 | A | TRP | 101 | E | -15.512040 | 19.542117 | -18.006826 | -5.860764 |
| 1LN1 | A | GLU | 102 | E | -12.947523 | 15.427286 | -15.129154 | -5.270185 |
| 1LN1 | A | VAL | 103 | E | -9.535539  | 14.006047 | -10.104646 | -4.258609 |
| 1LN1 | A | LYS | 104 | C | -7.831162  | 11.963457 | -8.935262  | -4.093923 |
| 1LN1 | A | TYR | 105 | C | -7.410367  | 12.127200 | -8.792066  | -4.103919 |
| 1LN1 | A | PRO | 106 | T | -6.583723  | 9.576765  | -9.066870  | -4.031362 |
| 1LN1 | A | PHE | 107 | T | -6.576068  | 9.549438  | -9.122471  | -4.037437 |
| 1LN1 | A | PRO | 108 | T | -6.580076  | 9.519198  | -9.115968  | -4.035964 |
| 1LN1 | A | MET | 109 | T | -6.651943  | 9.219673  | -9.148242  | -4.029743 |
| 1LN1 | A | SER | 110 | T | -6.742244  | 8.714896  | -9.229644  | -4.015927 |
| 1LN1 | A | ASN | 111 | C | -9.155234  | 7.463729  | -13.402995 | -4.506126 |
| 1LN1 | A | ARG | 112 | E | -13.534646 | 11.963800 | -17.565357 | -5.188527 |
| 1LN1 | A | ASP | 113 | E | -16.255732 | 13.770188 | -21.378768 | -5.742666 |
| 1LN1 | A | TYR | 114 | E | -17.120336 | 19.575434 | -19.202209 | -5.492957 |
| 1LN1 | A | VAL | 115 | E | -17.140973 | 19.910006 | -18.968758 | -5.475277 |
| 1LN1 | A | TYR | 116 | E | -17.219502 | 20.437578 | -18.440078 | -5.402354 |



|      |   |     |     |   |            |           |            |           |
|------|---|-----|-----|---|------------|-----------|------------|-----------|
| 1LN1 | A | LEU | 117 | E | -17.254195 | 20.413217 | -18.347301 | -5.391028 |
| 1LN1 | A | ARG | 118 | E | -17.817041 | 14.959606 | -23.367805 | -6.306186 |
| 1LN1 | A | GLN | 119 | E | -15.321511 | 12.296191 | -20.054637 | -5.449866 |
| 1LN1 | A | ARG | 120 | E | -13.294502 | 10.708128 | -17.954672 | -5.126856 |
| 1LN1 | A | ARG | 121 | E | -11.989846 | 11.379961 | -16.846203 | -5.547465 |
| 1LN1 | A | ASP | 122 | E | -9.403810  | 9.282007  | -13.666204 | -5.158836 |
| 1LN1 | A | LEU | 123 | E | -7.535541  | 7.958039  | -11.750048 | -4.967548 |
| 1LN1 | A | ASP | 124 | T | -6.760402  | 6.723712  | -11.919982 | -5.095714 |
| 1LN1 | A | MET | 125 | T | -6.611101  | 6.595310  | -12.074479 | -5.074232 |
| 1LN1 | A | GLU | 126 | T | -6.578837  | 6.590436  | -12.147816 | -5.063625 |
| 1LN1 | A | GLY | 127 | T | -6.583747  | 6.568310  | -12.135951 | -5.062871 |
| 1LN1 | A | ARG | 128 | T | -6.710083  | 6.252053  | -12.247959 | -5.087529 |
| 1LN1 | A | LYS | 129 | C | -7.366467  | 6.236823  | -12.784375 | -4.972438 |
| 1LN1 | A | ILE | 130 | E | -8.310707  | 6.603834  | -13.452293 | -4.866336 |
| 1LN1 | A | HIS | 131 | E | -10.789667 | 14.325847 | -12.403710 | -4.169110 |
| 1LN1 | A | VAL | 132 | E | -10.831851 | 15.365529 | -11.540393 | -3.937354 |
| 1LN1 | A | ILE | 133 | E | -10.829474 | 15.368651 | -11.530563 | -3.927074 |
| 1LN1 | A | LEU | 134 | E | -11.298460 | 16.371058 | -11.978977 | -4.039947 |
| 1LN1 | A | ALA | 135 | E | -10.660866 | 11.653897 | -13.089113 | -3.930139 |
| 1LN1 | A | ARG | 136 | E | -10.573760 | 10.899500 | -13.743738 | -4.141535 |
| 1LN1 | A | SER | 137 | E | -8.454135  | 8.407643  | -11.858850 | -4.311727 |
| 1LN1 | A | THR | 138 | C | -6.711414  | 6.378170  | -10.479416 | -4.135921 |
| 1LN1 | A | SER | 139 | C | -6.614608  | 6.413772  | -10.627808 | -4.129351 |
| 1LN1 | A | MET | 140 | B | -6.450401  | 6.324580  | -10.936492 | -4.249122 |
| 1LN1 | A | PRO | 141 | T | -6.108121  | 6.092065  | -11.239387 | -4.525868 |
| 1LN1 | A | GLN | 142 | T | -6.119107  | 6.049541  | -11.229865 | -4.529980 |
| 1LN1 | A | LEU | 143 | B | -6.370161  | 5.939511  | -11.683373 | -4.744358 |
| 1LN1 | A | GLY | 144 | T | -5.648972  | 4.120491  | -11.256917 | -4.534085 |
| 1LN1 | A | GLU | 145 | C | -5.444692  | 4.656812  | -10.720319 | -4.388085 |
| 1LN1 | A | ARG | 146 | T | -5.520236  | 4.530602  | -10.586741 | -4.296543 |
| 1LN1 | A | SER | 147 | T | -5.519717  | 4.534463  | -10.588691 | -4.296545 |
| 1LN1 | A | GLY | 148 | T | -5.520389  | 4.531699  | -10.584893 | -4.296418 |
| 1LN1 | A | VAL | 149 | T | -6.049250  | 6.037672  | -9.851889  | -4.101643 |
| 1LN1 | A | ILE | 150 | E | -7.643927  | 6.945015  | -11.324415 | -3.975825 |
| 1LN1 | A | ARG | 151 | E | -9.621825  | 8.901672  | -13.217588 | -4.379476 |
| 1LN1 | A | VAL | 152 | E | -11.414378 | 12.352483 | -15.248270 | -4.942623 |
| 1LN1 | A | LYS | 153 | T | -11.794491 | 13.165509 | -15.733237 | -5.309972 |
| 1LN1 | A | GLN | 154 | E | -11.962108 | 13.407842 | -15.615414 | -5.411172 |
| 1LN1 | A | TYR | 155 | E | -12.110724 | 14.203437 | -15.153627 | -5.509301 |
| 1LN1 | A | LYS | 156 | E | -12.112577 | 14.179945 | -15.134633 | -5.490141 |
| 1LN1 | A | GLN | 157 | E | -13.572247 | 14.376872 | -17.478127 | -5.362009 |
| 1LN1 | A | SER | 158 | E | -12.761051 | 15.421763 | -14.343026 | -4.561827 |
| 1LN1 | A | LEU | 159 | E | -11.904175 | 15.069170 | -13.269104 | -4.344863 |
| 1LN1 | A | ALA | 160 | E | -11.600949 | 13.972663 | -13.953496 | -4.482051 |
| 1LN1 | A | ILE | 161 | E | -9.958372  | 10.100809 | -14.368314 | -5.223866 |
| 1LN1 | A | GLU | 162 | E | -7.880451  | 6.733645  | -12.920429 | -5.021931 |
| 1LN1 | A | SER | 163 | E | -5.380628  | 4.439218  | -9.921286  | -4.325231 |
| 1LN1 | A | ASP | 164 | T | -3.902289  | 4.022815  | -8.870952  | -4.683042 |
| 1LN1 | A | GLY | 165 | T | -3.869366  | 4.052307  | -8.963661  | -4.682373 |
| 1LN1 | A | LYS | 166 | T | -3.869212  | 4.053151  | -8.964810  | -4.682431 |
| 1LN1 | A | LYS | 167 | T | -3.869870  | 4.050297  | -8.960444  | -4.682042 |
| 1LN1 | A | GLY | 168 | C | -3.917439  | 4.019747  | -8.881872  | -4.711684 |
| 1LN1 | A | SER | 169 | E | -5.596485  | 4.574419  | -10.577921 | -4.659227 |
| 1LN1 | A | LYS | 170 | E | -8.678829  | 7.631593  | -13.487653 | -4.925420 |
| 1LN1 | A | VAL | 171 | E | -10.922245 | 10.254935 | -14.219253 | -4.394595 |
| 1LN1 | A | PHE | 172 | E | -12.818826 | 14.875182 | -14.484939 | -4.614285 |
| 1LN1 | A | MET | 173 | E | -14.652866 | 17.694943 | -15.931191 | -4.973187 |
| 1LN1 | A | TYR | 174 | E | -16.010145 | 20.137502 | -17.051168 | -5.396075 |
| 1LN1 | A | TYR | 175 | E | -15.264979 | 17.596521 | -17.305104 | -5.429978 |
| 1LN1 | A | PHE | 176 | E | -11.589780 | 13.819510 | -14.472764 | -5.359824 |
| 1LN1 | A | ASP | 177 | E | -8.391184  | 8.567727  | -12.621306 | -5.026653 |
| 1LN1 | A | ASN | 178 | E | -6.450275  | 6.365548  | -10.584350 | -4.505207 |
| 1LN1 | A | PRO | 179 | C | -5.024347  | 6.581396  | -8.056677  | -3.959915 |
| 1LN1 | A | GLY | 180 | C | -4.118508  | 6.146990  | -7.170706  | -3.811703 |
| 1LN1 | A | GLY | 181 | C | -4.078362  | 6.189289  | -7.240442  | -3.794438 |
| 1LN1 | A | GLN | 182 | C | -4.073987  | 6.219523  | -7.238560  | -3.788911 |
| 1LN1 | A | ILE | 183 | C | -4.082981  | 6.235702  | -7.179335  | -3.775320 |
| 1LN1 | A | PRO | 184 | C | -4.204902  | 6.150196  | -7.033683  | -3.744068 |
| 1LN1 | A | SER | 185 | H | -5.604607  | 7.362855  | -8.100155  | -3.499836 |
| 1LN1 | A | TRP | 186 | H | -6.767544  | 10.923604 | -7.356496  | -3.248157 |
| 1LN1 | A | LEU | 187 | H | -7.602473  | 13.362939 | -7.083506  | -3.386237 |
| 1LN1 | A | ILE | 188 | H | -9.134575  | 13.463095 | -10.710807 | -4.148558 |
| 1LN1 | A | ASN | 189 | H | -9.234272  | 12.596472 | -11.516213 | -4.312966 |
| 1LN1 | A | TRP | 190 | H | -9.788213  | 11.107604 | -12.259734 | -3.845727 |
| 1LN1 | A | ALA | 191 | H | -8.978518  | 8.057253  | -13.038754 | -4.090703 |
| 1LN1 | A | ALA | 192 | H | -8.134029  | 7.692057  | -11.775892 | -3.925166 |
| 1LN1 | A | LYS | 193 | H | -8.062905  | 7.657349  | -11.896137 | -3.928684 |
| 1LN1 | A | ASN | 194 | H | -7.970951  | 7.694839  | -11.954444 | -3.972666 |
| 1LN1 | A | GLY | 195 | H | -7.971900  | 7.695508  | -11.951252 | -3.973940 |
| 1LN1 | A | VAL | 196 | H | -8.059990  | 7.781951  | -11.735550 | -3.939307 |
| 1LN1 | A | PRO | 197 | H | -8.728300  | 8.096280  | -12.478439 | -4.074100 |

|      |   |     |     |   |            |           |            |           |
|------|---|-----|-----|---|------------|-----------|------------|-----------|
| 1LN1 | A | ASN | 198 | H | -8.990562  | 8.405332  | -12.286957 | -4.141572 |
| 1LN1 | A | PHE | 199 | H | -11.309120 | 12.928345 | -14.202187 | -4.522488 |
| 1LN1 | A | LEU | 200 | H | -11.185729 | 13.182258 | -14.066994 | -4.727378 |
| 1LN1 | A | LYS | 201 | H | -11.058219 | 12.096810 | -14.651628 | -4.730711 |
| 1LN1 | A | ASP | 202 | H | -11.096619 | 11.889900 | -14.732091 | -4.742623 |
| 1LN1 | A | MET | 203 | H | -11.153890 | 11.816691 | -14.659355 | -4.728707 |
| 1LN1 | A | ALA | 204 | H | -11.138834 | 11.610775 | -14.881995 | -4.801380 |
| 1LN1 | A | ARG | 205 | H | -11.220633 | 9.753264  | -16.595201 | -5.249628 |
| 1LN1 | A | ALA | 206 | H | -10.799384 | 9.646976  | -16.328935 | -5.464910 |
| 1LN1 | A | CYS | 207 | H | -8.518279  | 6.891068  | -12.941666 | -4.482365 |
| 1LN1 | A | GLN | 208 | H | -8.518279  | 6.891068  | -12.941666 | -4.482365 |
| 1LN1 | A | ASN | 209 | H | -8.518279  | 6.891068  | -12.941666 | -4.482365 |
| 1LN1 | A | TYR | 210 | C | -8.518279  | 6.891068  | -12.941666 | -4.482365 |
| 1LPJ | A | PRO | 1   | C | -7.642003  | 8.442192  | -10.062738 | -3.515044 |
| 1LPJ | A | ALA | 2   | C | -7.642003  | 8.442192  | -10.062738 | -3.515044 |
| 1LPJ | A | ASP | 3   | C | -7.642003  | 8.442192  | -10.062738 | -3.515044 |
| 1LPJ | A | LEU | 4   | C | -7.642003  | 8.442192  | -10.062738 | -3.515044 |
| 1LPJ | A | SER | 5   | C | -9.593828  | 10.035530 | -13.302614 | -4.545091 |
| 1LPJ | A | GLY | 6   | E | -10.555895 | 11.991684 | -15.055982 | -5.473594 |
| 1LPJ | A | THR | 7   | E | -10.895726 | 15.772027 | -13.640331 | -5.452453 |
| 1LPJ | A | TRP | 8   | E | -10.899924 | 15.940048 | -13.442084 | -5.369955 |
| 1LPJ | A | THR | 9   | E | -10.076338 | 11.655616 | -14.031516 | -5.078175 |
| 1LPJ | A | LEU | 10  | E | -9.734824  | 10.148576 | -14.479104 | -5.008051 |
| 1LPJ | A | LEU | 11  | E | -9.571420  | 8.512294  | -15.255290 | -5.011221 |
| 1LPJ | A | SER | 12  | E | -9.582021  | 8.167098  | -15.413060 | -5.006545 |
| 1LPJ | A | SER | 13  | T | -9.552541  | 8.207791  | -15.495481 | -5.047508 |
| 1LPJ | A | ASP | 14  | T | -9.577302  | 8.047599  | -15.955464 | -5.311816 |
| 1LPJ | A | ASN | 15  | T | -9.831069  | 7.873301  | -16.421613 | -5.512263 |
| 1LPJ | A | PHE | 16  | H | -10.182374 | 9.892282  | -15.987002 | -5.867164 |
| 1LPJ | A | GLU | 17  | H | -10.211370 | 10.017932 | -15.886942 | -5.896204 |
| 1LPJ | A | GLY | 18  | H | -10.313676 | 10.136366 | -15.692469 | -5.917749 |
| 1LPJ | A | TYR | 19  | H | -12.425971 | 16.155610 | -16.387576 | -6.073767 |
| 1LPJ | A | MET | 20  | H | -10.596914 | 12.911441 | -13.807903 | -5.265857 |
| 1LPJ | A | LEU | 21  | H | -9.595005  | 12.014099 | -12.517710 | -4.732734 |
| 1LPJ | A | ALA | 22  | H | -9.132621  | 11.459707 | -12.549805 | -4.753842 |
| 1LPJ | A | LEU | 23  | H | -8.704708  | 11.222637 | -12.533854 | -4.941745 |
| 1LPJ | A | GLY | 24  | C | -6.869480  | 7.128206  | -11.411474 | -4.763232 |
| 1LPJ | A | ILE | 25  | C | -6.753878  | 7.450682  | -11.396835 | -4.752093 |
| 1LPJ | A | ASP | 26  | C | -6.751807  | 7.448490  | -11.413599 | -4.757549 |
| 1LPJ | A | PHE | 27  | H | -6.756206  | 7.420557  | -11.409742 | -4.758525 |
| 1LPJ | A | ALA | 28  | H | -6.766783  | 7.356423  | -11.392264 | -4.751826 |
| 1LPJ | A | THR | 29  | H | -7.728225  | 9.081780  | -11.534875 | -4.741266 |
| 1LPJ | A | ARG | 30  | H | -9.249845  | 10.444712 | -13.860128 | -5.187531 |
| 1LPJ | A | LYS | 31  | H | -7.451347  | 9.043062  | -10.001857 | -3.953529 |
| 1LPJ | A | ILE | 32  | H | -6.974578  | 9.904517  | -9.496330  | -4.026552 |
| 1LPJ | A | ALA | 33  | H | -6.948848  | 9.928272  | -9.583854  | -4.048675 |
| 1LPJ | A | LYS | 34  | H | -6.890810  | 9.968815  | -9.738439  | -4.107608 |
| 1LPJ | A | LEU | 35  | C | -6.885285  | 9.977023  | -9.766887  | -4.114495 |
| 1LPJ | A | LEU | 36  | C | -7.167473  | 10.566956 | -9.665072  | -4.223988 |
| 1LPJ | A | LYS | 37  | C | -8.038849  | 10.456065 | -11.487691 | -4.664058 |
| 1LPJ | A | PRO | 38  | C | -8.233948  | 10.439441 | -11.413686 | -4.701583 |
| 1LPJ | A | GLN | 39  | E | -9.617532  | 11.027772 | -12.916140 | -4.863216 |
| 1LPJ | A | LYS | 40  | E | -12.096126 | 14.507378 | -16.334471 | -5.690628 |
| 1LPJ | A | VAL | 41  | E | -10.667804 | 11.535503 | -14.826340 | -5.410412 |
| 1LPJ | A | ILE | 42  | E | -8.072526  | 9.557634  | -12.694768 | -5.648746 |
| 1LPJ | A | GLU | 43  | E | -7.292623  | 7.367426  | -13.493571 | -5.838646 |
| 1LPJ | A | GLN | 44  | E | -6.766209  | 6.333343  | -13.312579 | -5.609409 |
| 1LPJ | A | ASN | 45  | E | -6.710497  | 6.629513  | -13.195545 | -5.565478 |
| 1LPJ | A | GLY | 46  | T | -6.710080  | 6.633965  | -13.195372 | -5.565359 |
| 1LPJ | A | ASP | 47  | T | -6.771862  | 6.315632  | -13.253328 | -5.555828 |
| 1LPJ | A | SER | 48  | E | -6.986502  | 6.206579  | -13.020578 | -5.401959 |
| 1LPJ | A | PHE | 49  | E | -8.125912  | 9.688008  | -12.053428 | -5.125770 |
| 1LPJ | A | THR | 50  | E | -10.394424 | 12.179425 | -14.109928 | -5.395247 |
| 1LPJ | A | ILE | 51  | E | -12.188977 | 16.392689 | -14.999339 | -5.337445 |
| 1LPJ | A | HIS | 52  | E | -11.957688 | 12.406964 | -16.684469 | -5.392690 |
| 1LPJ | A | THR | 53  | E | -10.540854 | 11.419791 | -14.753690 | -5.352774 |
| 1LPJ | A | ASN | 54  | E | -9.940186  | 10.679344 | -14.351955 | -5.111226 |
| 1LPJ | A | SER | 55  | E | -7.186756  | 9.560057  | -10.172015 | -4.581318 |
| 1LPJ | A | SER | 56  | T | -7.182831  | 9.568458  | -10.193754 | -4.582313 |
| 1LPJ | A | LEU | 57  | T | -7.182508  | 9.571383  | -10.195318 | -4.582582 |
| 1LPJ | A | ARG | 58  | E | -7.184254  | 9.566469  | -10.182572 | -4.580228 |
| 1LPJ | A | ASN | 59  | E | -7.165294  | 9.689828  | -10.204272 | -4.594890 |
| 1LPJ | A | TYR | 60  | E | -8.985160  | 12.857420 | -11.726591 | -4.989383 |
| 1LPJ | A | PHE | 61  | E | -8.853767  | 13.923689 | -11.097057 | -4.969019 |
| 1LPJ | A | VAL | 62  | E | -8.752939  | 14.338529 | -10.852725 | -4.891799 |
| 1LPJ | A | LYS | 63  | E | -7.960867  | 13.981076 | -9.819013  | -4.871760 |
| 1LPJ | A | PHE | 64  | E | -7.733247  | 13.380864 | -9.809455  | -4.771169 |
| 1LPJ | A | LYS | 65  | E | -6.394035  | 9.733156  | -9.846783  | -4.971868 |
| 1LPJ | A | VAL | 66  | T | -6.369798  | 9.795233  | -9.887553  | -4.972671 |
| 1LPJ | A | GLY | 67  | T | -6.314752  | 9.830619  | -10.041022 | -5.021035 |
| 1LPJ | A | GLU | 68  | B | -6.342436  | 9.637745  | -10.070456 | -5.028758 |

|      |   |     |     |   |            |           |            |           |
|------|---|-----|-----|---|------------|-----------|------------|-----------|
| 1LPJ | A | GLU | 69  | C | -6.366156  | 9.528172  | -10.070037 | -5.044337 |
| 1LPJ | A | PHE | 70  | E | -7.509529  | 10.799921 | -11.360645 | -5.334434 |
| 1LPJ | A | ASP | 71  | E | -7.709085  | 10.324457 | -11.718673 | -5.496117 |
| 1LPJ | A | GLU | 72  | E | -9.209959  | 7.671991  | -15.883151 | -5.627847 |
| 1LPJ | A | ASP | 73  | E | -8.337805  | 8.066757  | -13.826314 | -5.252529 |
| 1LPJ | A | ASN | 74  | E | -8.345005  | 8.014819  | -13.811581 | -5.240246 |
| 1LPJ | A | ARG | 75  | T | -7.767061  | 8.342965  | -12.880487 | -5.098416 |
| 1LPJ | A | GLY | 76  | T | -7.785533  | 8.351416  | -12.797736 | -5.083207 |
| 1LPJ | A | LEU | 77  | T | -7.813407  | 8.447366  | -12.639721 | -5.061064 |
| 1LPJ | A | ASP | 78  | T | -8.042148  | 8.556768  | -12.362157 | -5.020939 |
| 1LPJ | A | ASN | 79  | T | -8.043915  | 8.554953  | -12.347838 | -5.019040 |
| 1LPJ | A | ARG | 80  | E | -11.287097 | 10.713569 | -17.597162 | -6.087732 |
| 1LPJ | A | LYS | 81  | E | -11.507410 | 10.846006 | -17.648408 | -6.076640 |
| 1LPJ | A | CYS | 82  | E | -12.065623 | 9.768289  | -19.125793 | -6.129746 |
| 1LPJ | A | LYS | 83  | E | -11.711722 | 12.695345 | -15.349744 | -4.954330 |
| 1LPJ | A | SER | 84  | E | -11.590061 | 13.708858 | -14.620594 | -4.778489 |
| 1LPJ | A | LEU | 85  | E | -10.994276 | 15.082452 | -12.754242 | -4.468351 |
| 1LPJ | A | VAL | 86  | E | -8.879585  | 13.303715 | -10.119955 | -4.326473 |
| 1LPJ | A | ILE | 87  | E | -8.399199  | 12.198062 | -10.802625 | -4.528401 |
| 1LPJ | A | TRP | 88  | E | -7.537233  | 11.385142 | -10.224007 | -4.631852 |
| 1LPJ | A | ASP | 89  | E | -6.672260  | 9.950304  | -9.628309  | -4.451339 |
| 1LPJ | A | ASN | 90  | T | -6.665186  | 9.971340  | -9.652053  | -4.453331 |
| 1LPJ | A | ASP | 91  | T | -6.678799  | 9.895105  | -9.644574  | -4.456653 |
| 1LPJ | A | ARG | 92  | E | -6.695749  | 9.858709  | -9.597096  | -4.449837 |
| 1LPJ | A | LEU | 93  | E | -6.817236  | 9.567279  | -9.493745  | -4.401241 |
| 1LPJ | A | THR | 94  | E | -9.154379  | 12.129748 | -11.800297 | -4.631621 |
| 1LPJ | A | CYS | 95  | E | -10.164718 | 13.266558 | -12.677635 | -4.759754 |
| 1LPJ | A | ILE | 96  | E | -10.157934 | 12.354824 | -13.404293 | -4.950587 |
| 1LPJ | A | GLN | 97  | E | -10.940611 | 8.666729  | -18.466262 | -6.396417 |
| 1LPJ | A | LYS | 98  | E | -9.149356  | 7.496468  | -16.161140 | -6.324057 |
| 1LPJ | A | GLY | 99  | E | -6.675601  | 5.693233  | -13.061443 | -5.741506 |
| 1LPJ | A | GLU | 100 | T | -6.675596  | 5.693273  | -13.061514 | -5.741531 |
| 1LPJ | A | LYS | 101 | T | -6.675875  | 5.692198  | -13.059213 | -5.741374 |
| 1LPJ | A | LYS | 102 | T | -6.675985  | 5.691438  | -13.058052 | -5.741070 |
| 1LPJ | A | ASN | 103 | T | -6.684728  | 5.665414  | -13.013653 | -5.732467 |
| 1LPJ | A | ARG | 104 | E | -12.252567 | 9.449764  | -19.890586 | -6.415056 |
| 1LPJ | A | GLY | 105 | E | -12.689531 | 11.667698 | -19.224875 | -6.260769 |
| 1LPJ | A | TRP | 106 | E | -13.010198 | 14.431120 | -18.008049 | -6.209904 |
| 1LPJ | A | THR | 107 | E | -12.367517 | 16.197005 | -15.342618 | -5.803255 |
| 1LPJ | A | HIS | 108 | E | -9.864031  | 13.794193 | -12.688067 | -5.578418 |
| 1LPJ | A | TRP | 109 | E | -7.775730  | 11.189293 | -11.232806 | -5.438540 |
| 1LPJ | A | ILE | 110 | E | -5.254128  | 7.592539  | -9.199734  | -4.945619 |
| 1LPJ | A | GLU | 111 | E | -5.220980  | 7.668415  | -9.295889  | -4.961649 |
| 1LPJ | A | GLY | 112 | T | -5.219921  | 7.675096  | -9.301722  | -4.962537 |
| 1LPJ | A | ASP | 113 | T | -5.220147  | 7.672798  | -9.300462  | -4.962302 |
| 1LPJ | A | LYS | 114 | E | -5.227897  | 7.627521  | -9.275572  | -4.956069 |
| 1LPJ | A | LEU | 115 | E | -6.926615  | 9.064477  | -11.016333 | -5.245927 |
| 1LPJ | A | HIS | 116 | E | -8.963122  | 11.464443 | -12.584226 | -5.459309 |
| 1LPJ | A | LEU | 117 | E | -11.670004 | 16.688875 | -14.548243 | -5.633463 |
| 1LPJ | A | GLU | 118 | E | -11.977983 | 17.444920 | -14.853512 | -5.799813 |
| 1LPJ | A | MET | 119 | E | -11.055203 | 13.863986 | -14.930676 | -5.802252 |
| 1LPJ | A | PHE | 120 | E | -9.887914  | 11.312424 | -14.409319 | -5.652617 |
| 1LPJ | A | CYS | 121 | E | -7.316459  | 7.817973  | -12.209895 | -5.313375 |
| 1LPJ | A | GLU | 122 | T | -7.144548  | 7.683390  | -12.483681 | -5.320099 |
| 1LPJ | A | GLY | 123 | T | -7.106446  | 7.711347  | -12.566585 | -5.318825 |
| 1LPJ | A | GLN | 124 | E | -7.107058  | 7.705731  | -12.564213 | -5.318333 |
| 1LPJ | A | VAL | 125 | E | -7.111732  | 7.679957  | -12.550600 | -5.315899 |
| 1LPJ | A | CYS | 126 | E | -7.822378  | 7.466136  | -13.407485 | -5.332056 |
| 1LPJ | A | LYS | 127 | E | -8.749818  | 8.142371  | -13.823977 | -5.301306 |
| 1LPJ | A | GLN | 128 | E | -12.473412 | 11.539182 | -18.209898 | -6.044597 |
| 1LPJ | A | THR | 129 | E | -11.382385 | 15.194197 | -13.978429 | -5.455613 |
| 1LPJ | A | PHE | 130 | E | -8.861342  | 13.394320 | -9.796733  | -4.176118 |
| 1LPJ | A | GLN | 131 | E | -8.861342  | 13.394320 | -9.796733  | -4.176118 |
| 1LPJ | A | ARG | 132 | E | -8.861342  | 13.394320 | -9.796733  | -4.176118 |
| 1LPJ | A | ALA | 133 | C | -8.861342  | 13.394320 | -9.796733  | -4.176118 |
| 1LSL | A | GLN | 416 | C | -6.334041  | 4.948789  | -12.949140 | -5.432377 |
| 1LSL | A | ASP | 417 | C | -6.334041  | 4.948789  | -12.949140 | -5.432377 |
| 1LSL | A | GLY | 418 | C | -6.334041  | 4.948789  | -12.949140 | -5.432377 |
| 1LSL | A | GLY | 419 | B | -6.334041  | 4.948789  | -12.949140 | -5.432377 |
| 1LSL | A | TRP | 420 | C | -10.414007 | 10.239581 | -16.310776 | -6.161536 |
| 1LSL | A | SER | 421 | C | -9.085805  | 7.688643  | -14.048557 | -5.006092 |
| 1LSL | A | HIS | 422 | C | -8.462637  | 10.392809 | -12.521084 | -5.194379 |
| 1LSL | A | TRP | 423 | C | -8.457812  | 10.406770 | -12.540642 | -5.195621 |
| 1LSL | A | SER | 424 | C | -8.229839  | 9.376697  | -12.700786 | -4.881403 |
| 1LSL | A | PRO | 425 | C | -7.437340  | 7.925413  | -11.868692 | -4.575345 |
| 1LSL | A | TRP | 426 | C | -7.461821  | 7.951797  | -11.779774 | -4.551442 |
| 1LSL | A | SER | 427 | C | -7.448883  | 6.966818  | -12.094783 | -4.386125 |
| 1LSL | A | SER | 428 | C | -5.811679  | 4.457110  | -10.299612 | -3.919507 |
| 1LSL | A | CYS | 429 | T | -5.330052  | 4.764835  | -10.334859 | -4.237131 |
| 1LSL | A | SER | 430 | T | -5.214030  | 4.581363  | -10.491358 | -4.240534 |
| 1LSL | A | VAL | 431 | T | -5.007838  | 4.610784  | -10.571692 | -4.339566 |

|      |   |     |     |   |            |           |            |           |
|------|---|-----|-----|---|------------|-----------|------------|-----------|
| 1LSL | A | THR | 432 | T | -4.509353  | 5.440734  | -10.658399 | -5.128253 |
| 1LSL | A | CYS | 433 | T | -4.561998  | 5.572345  | -10.749220 | -5.267950 |
| 1LSL | A | GLY | 434 | E | -4.628108  | 5.738093  | -10.798931 | -5.367724 |
| 1LSL | A | ASP | 435 | E | -4.664911  | 5.905069  | -10.766001 | -5.445061 |
| 1LSL | A | GLY | 436 | E | -4.771722  | 6.145808  | -10.764939 | -5.615994 |
| 1LSL | A | VAL | 437 | E | -6.063334  | 6.782352  | -11.071446 | -4.787853 |
| 1LSL | A | ILE | 438 | E | -6.243966  | 7.243437  | -10.583625 | -4.683060 |
| 1LSL | A | THR | 439 | E | -7.225743  | 8.596402  | -10.969922 | -4.844365 |
| 1LSL | A | ARG | 440 | E | -10.234301 | 12.020458 | -13.934237 | -5.076975 |
| 1LSL | A | ILE | 441 | E | -9.535946  | 9.828187  | -14.164323 | -5.290361 |
| 1LSL | A | ARG | 442 | C | -9.437261  | 9.327424  | -14.510159 | -5.341000 |
| 1LSL | A | LEU | 443 | C | -8.048032  | 6.519722  | -13.106805 | -4.644499 |
| 1LSL | A | CYS | 444 | T | -7.652358  | 6.562889  | -12.933133 | -4.588505 |
| 1LSL | A | ASN | 445 | T | -7.387399  | 7.029963  | -12.322179 | -4.371479 |
| 1LSL | A | SER | 446 | T | -7.391365  | 7.002866  | -12.318610 | -4.358832 |
| 1LSL | A | PRO | 447 | B | -7.156751  | 6.995558  | -11.897800 | -4.140788 |
| 1LSL | A | SER | 448 | T | -4.925330  | 4.701936  | -8.672905  | -3.743785 |
| 1LSL | A | PRO | 449 | C | -3.155104  | 3.995029  | -7.234430  | -4.027231 |
| 1LSL | A | GLN | 450 | T | -2.946939  | 3.722050  | -7.673004  | -4.127200 |
| 1LSL | A | MET | 451 | T | -2.584817  | 3.141415  | -7.632195  | -3.997972 |
| 1LSL | A | ASN | 452 | T | -2.578067  | 3.154254  | -7.663092  | -4.004190 |
| 1LSL | A | GLY | 453 | T | -2.588275  | 3.125537  | -7.649243  | -4.008403 |
| 1LSL | A | LYS | 454 | C | -2.839318  | 2.638856  | -7.960991  | -3.974585 |
| 1LSL | A | PRO | 455 | C | -2.973542  | 2.535302  | -7.852236  | -3.886854 |
| 1LSL | A | CYS | 456 | C | -4.141598  | 3.431366  | -10.391038 | -4.547383 |
| 1LSL | A | GLU | 457 | C | -4.035822  | 3.815394  | -9.888923  | -4.415998 |
| 1LSL | A | GLY | 458 | C | -4.032165  | 3.900552  | -9.849842  | -4.416855 |
| 1LSL | A | GLU | 459 | T | -4.211269  | 4.303587  | -9.676955  | -4.392811 |
| 1LSL | A | ALA | 460 | T | -4.562170  | 5.309136  | -9.216958  | -4.249717 |
| 1LSL | A | ARG | 461 | E | -4.594331  | 6.019348  | -8.650771  | -4.141000 |
| 1LSL | A | GLU | 462 | E | -5.390986  | 8.854184  | -8.980913  | -4.455522 |
| 1LSL | A | THR | 463 | E | -4.935905  | 8.367599  | -8.454263  | -4.539656 |
| 1LSL | A | LYS | 464 | E | -4.960521  | 8.218801  | -8.583435  | -4.590818 |
| 1LSL | A | ALA | 465 | E | -4.858011  | 7.754495  | -8.899505  | -4.607496 |
| 1LSL | A | CYS | 466 | E | -4.810856  | 7.109050  | -9.260612  | -4.641475 |
| 1LSL | A | LYS | 467 | E | -4.417534  | 7.569067  | -9.303648  | -5.069888 |
| 1LSL | A | LYS | 468 | E | -4.554409  | 7.525693  | -9.615690  | -5.178783 |
| 1LSL | A | ASP | 469 | B | -4.538896  | 7.522309  | -9.533581  | -5.105320 |
| 1LSL | A | ALA | 470 | C | -4.593368  | 7.741281  | -9.425093  | -5.135804 |
| 1LSL | A | CYS | 471 | C | -4.651739  | 7.937755  | -9.350276  | -5.155810 |
| 1LSL | A | PRO | 472 | C | -5.130358  | 7.467960  | -9.099123  | -4.208547 |
| 1LSL | A | ILE | 473 | B | -5.297116  | 7.393870  | -9.094588  | -4.161388 |
| 1LSL | A | ASN | 474 | C | -5.431192  | 7.434166  | -9.176457  | -4.277886 |
| 1LSL | A | GLY | 475 | C | -5.444109  | 7.340603  | -9.273334  | -4.329143 |
| 1LSL | A | GLY | 476 | E | -5.604532  | 7.359270  | -9.142372  | -4.348277 |
| 1LSL | A | TRP | 477 | E | -7.078849  | 8.155842  | -12.084283 | -5.191860 |
| 1LSL | A | GLY | 478 | E | -6.811350  | 7.394702  | -12.018565 | -4.965671 |
| 1LSL | A | PRO | 479 | C | -6.885166  | 7.162155  | -11.944109 | -4.869178 |
| 1LSL | A | TRP | 480 | C | -7.306192  | 6.878144  | -12.028021 | -4.692414 |
| 1LSL | A | SER | 481 | C | -7.072402  | 6.349533  | -12.137393 | -4.557403 |
| 1LSL | A | PRO | 482 | C | -6.291529  | 6.306252  | -11.258434 | -4.645470 |
| 1LSL | A | TRP | 483 | C | -6.386594  | 6.299729  | -11.174501 | -4.657132 |
| 1LSL | A | ASP | 484 | C | -6.288203  | 5.791452  | -11.481995 | -4.577308 |
| 1LSL | A | ILE | 485 | C | -5.525488  | 3.941468  | -10.702344 | -3.962130 |
| 1LSL | A | CYS | 486 | C | -5.525275  | 3.895542  | -10.726223 | -3.961457 |
| 1LSL | A | SER | 487 | C | -5.631383  | 3.317068  | -10.779512 | -3.805305 |
| 1LSL | A | VAL | 488 | T | -4.996170  | 3.816025  | -10.677977 | -4.377852 |
| 1LSL | A | THR | 489 | T | -4.227052  | 4.967899  | -10.421845 | -5.268728 |
| 1LSL | A | CYS | 490 | T | -4.225270  | 5.131866  | -10.520272 | -5.395232 |
| 1LSL | A | GLY | 491 | T | -4.224822  | 5.138928  | -10.523185 | -5.398805 |
| 1LSL | A | GLY | 492 | C | -4.227173  | 5.144454  | -10.513381 | -5.403270 |
| 1LSL | A | GLY | 493 | E | -4.344973  | 5.376359  | -10.484275 | -5.561659 |
| 1LSL | A | VAL | 494 | E | -5.667912  | 5.300336  | -11.670396 | -5.303608 |
| 1LSL | A | GLN | 495 | E | -7.505799  | 6.246525  | -13.589454 | -5.541688 |
| 1LSL | A | LYS | 496 | E | -9.279401  | 7.169018  | -15.433335 | -5.701738 |
| 1LSL | A | ARG | 497 | E | -12.657719 | 9.993615  | -19.231504 | -5.933012 |
| 1LSL | A | SER | 498 | E | -10.979740 | 8.359308  | -16.300036 | -5.115808 |
| 1LSL | A | ARG | 499 | C | -9.526790  | 8.998121  | -14.353980 | -5.160887 |
| 1LSL | A | LEU | 500 | E | -7.233744  | 6.098838  | -11.661688 | -4.312437 |
| 1LSL | A | CYS | 501 | E | -6.163187  | 7.218274  | -10.174781 | -4.467116 |
| 1LSL | A | ASN | 502 | E | -5.749290  | 7.987330  | -9.256068  | -4.223201 |
| 1LSL | A | ASN | 503 | E | -5.708301  | 8.079346  | -9.270054  | -4.204858 |
| 1LSL | A | PRO | 504 | B | -5.704624  | 8.103806  | -9.269069  | -4.201351 |
| 1LSL | A | THR | 505 | T | -5.602147  | 8.466673  | -9.058139  | -4.209783 |
| 1LSL | A | PRO | 506 | C | -5.141786  | 8.924267  | -8.169382  | -4.365439 |
| 1LSL | A | GLN | 507 | B | -5.049699  | 8.525399  | -8.531976  | -4.525727 |
| 1LSL | A | PHE | 508 | T | -4.584998  | 7.463751  | -8.587859  | -4.554889 |
| 1LSL | A | GLY | 509 | T | -4.008057  | 5.094034  | -9.307182  | -4.703727 |
| 1LSL | A | GLY | 510 | T | -3.892955  | 4.530227  | -9.544835  | -4.639007 |
| 1LSL | A | LYS | 511 | C | -3.571354  | 3.096309  | -9.708151  | -4.517434 |
| 1LSL | A | ASP | 512 | C | -3.566106  | 2.953915  | -9.791734  | -4.518431 |

|      |   |     |     |   |            |           |            |           |
|------|---|-----|-----|---|------------|-----------|------------|-----------|
| 1LSL | A | CYS | 513 | C | -3.622808  | 2.546557  | -9.938231  | -4.510295 |
| 1LSL | A | VAL | 514 | C | -3.616330  | 2.692224  | -9.668557  | -4.367102 |
| 1LSL | A | GLY | 515 | C | -3.683862  | 2.779141  | -9.567908  | -4.378498 |
| 1LSL | A | ASP | 516 | T | -4.175870  | 3.904440  | -9.376000  | -4.402685 |
| 1LSL | A | VAL | 517 | T | -4.233586  | 4.094190  | -9.102992  | -4.373874 |
| 1LSL | A | THR | 518 | E | -4.248224  | 4.142537  | -9.016130  | -4.373767 |
| 1LSL | A | GLU | 519 | E | -6.230083  | 6.507319  | -11.304900 | -5.018790 |
| 1LSL | A | ASN | 520 | E | -7.563833  | 7.844371  | -13.183330 | -5.361395 |
| 1LSL | A | GLN | 521 | E | -8.111143  | 8.601872  | -13.545859 | -5.523119 |
| 1LSL | A | ILE | 522 | E | -7.688183  | 7.189860  | -14.597597 | -6.084511 |
| 1LSL | A | CYS | 523 | E | -6.928194  | 6.291610  | -17.062408 | -8.368504 |
| 1LSL | A | ASN | 524 | T | -5.062869  | 6.879792  | -12.834808 | -7.261720 |
| 1LSL | A | LYS | 525 | T | -3.670461  | 4.118790  | -7.906869  | -3.970376 |
| 1LSL | A | GLN | 526 | C | -3.670461  | 4.118790  | -7.906869  | -3.970376 |
| 1LSL | A | ASP | 527 | C | -3.670461  | 4.118790  | -7.906869  | -3.970376 |
| 1LSL | A | CYS | 528 | C | -3.670461  | 4.118790  | -7.906869  | -3.970376 |
| 1M7B | A | VAL | 22  | C | -9.761125  | 7.582881  | -14.479724 | -4.615596 |
| 1M7B | A | LYS | 23  | E | -9.761125  | 7.582881  | -14.479724 | -4.615596 |
| 1M7B | A | CYS | 24  | E | -9.761125  | 7.582881  | -14.479724 | -4.615596 |
| 1M7B | A | LYS | 25  | E | -9.761125  | 7.582881  | -14.479724 | -4.615596 |
| 1M7B | A | ILE | 26  | E | -8.902016  | 15.546866 | -7.965830  | -3.719384 |
| 1M7B | A | VAL | 27  | E | -8.864894  | 15.386330 | -8.211618  | -3.754387 |
| 1M7B | A | VAL | 28  | E | -8.856903  | 15.326233 | -8.300017  | -3.766564 |
| 1M7B | A | VAL | 29  | E | -8.847673  | 15.229251 | -8.427163  | -3.789684 |
| 1M7B | A | GLY | 30  | E | -8.843496  | 15.168358 | -8.507192  | -3.806316 |
| 1M7B | A | ASP | 31  | T | -10.138980 | 10.938929 | -14.430541 | -4.842567 |
| 1M7B | A | SER | 32  | T | -10.548540 | 8.613930  | -17.239385 | -5.498121 |
| 1M7B | A | GLN | 33  | T | -10.600424 | 8.203181  | -17.920803 | -5.806844 |
| 1M7B | A | CYS | 34  | T | -10.531245 | 8.437584  | -17.648113 | -5.802606 |
| 1M7B | A | GLY | 35  | C | -10.503287 | 9.231088  | -17.008424 | -5.659646 |
| 1M7B | A | LYS | 36  | H | -10.671428 | 9.969383  | -16.532855 | -5.555541 |
| 1M7B | A | THR | 37  | H | -10.738637 | 10.244622 | -16.240080 | -5.479626 |
| 1M7B | A | ALA | 38  | H | -10.864868 | 10.514261 | -15.822048 | -5.297118 |
| 1M7B | A | LEU | 39  | H | -11.499544 | 12.650642 | -15.069949 | -5.075317 |
| 1M7B | A | LEU | 40  | H | -12.322696 | 18.007936 | -13.064386 | -4.464469 |
| 1M7B | A | HIS | 41  | H | -11.164206 | 16.146703 | -12.119308 | -4.550457 |
| 1M7B | A | VAL | 42  | H | -8.949305  | 14.044115 | -9.738771  | -4.370828 |
| 1M7B | A | PHE | 43  | H | -8.207063  | 11.705115 | -10.534021 | -4.478156 |
| 1M7B | A | ALA | 44  | H | -7.721925  | 10.873234 | -10.808051 | -4.563545 |
| 1M7B | A | LYS | 45  | H | -7.575508  | 11.357102 | -11.347344 | -5.063824 |
| 1M7B | A | ASP | 46  | C | -6.880107  | 10.582768 | -10.352439 | -4.781958 |
| 1M7B | A | CYS | 47  | C | -5.037159  | 9.446895  | -6.839984  | -4.071902 |
| 1M7B | A | PHE | 48  | C | -4.895081  | 10.013550 | -6.787405  | -4.138651 |
| 1M7B | A | PRO | 49  | C | -3.593527  | 8.029389  | -5.705262  | -3.955530 |
| 1M7B | A | GLU | 50  | C | -2.419455  | 5.368285  | -5.699678  | -3.940686 |
| 1M7B | A | ASN | 51  | C | -2.396252  | 5.431025  | -5.771534  | -3.959366 |
| 1M7B | A | TYR | 52  | C | -2.401589  | 5.392996  | -5.765745  | -3.958055 |
| 1M7B | A | VAL | 53  | C | -2.403006  | 5.376652  | -5.763699  | -3.956442 |
| 1M7B | A | PRO | 54  | C | -2.480583  | 5.020542  | -5.767187  | -3.943681 |
| 1M7B | A | THR | 55  | C | -4.289586  | 7.137809  | -7.466712  | -4.300091 |
| 1M7B | A | VAL | 56  | C | -5.757222  | 10.193090 | -8.120193  | -4.296815 |
| 1M7B | A | PHE | 57  | C | -6.481245  | 12.539449 | -7.604874  | -4.321091 |
| 1M7B | A | GLU | 58  | E | -7.725478  | 14.876978 | -10.599870 | -5.941912 |
| 1M7B | A | ASN | 59  | E | -8.675309  | 15.239087 | -12.903313 | -6.757230 |
| 1M7B | A | TYR | 60  | E | -9.350064  | 13.103186 | -12.751532 | -5.227203 |
| 1M7B | A | THR | 61  | E | -7.710125  | 11.740796 | -9.977011  | -4.702426 |
| 1M7B | A | ALA | 62  | E | -7.673237  | 11.898442 | -10.065628 | -4.750566 |
| 1M7B | A | SER | 63  | E | -7.248007  | 11.872163 | -9.849505  | -4.778662 |
| 1M7B | A | PHE | 64  | E | -4.706005  | 9.760113  | -6.194932  | -4.135511 |
| 1M7B | A | GLU | 65  | E | -2.618604  | 6.315967  | -5.461950  | -4.143131 |
| 1M7B | A | ILE | 66  | T | -2.578874  | 6.358942  | -5.569972  | -4.147697 |
| 1M7B | A | ASP | 67  | T | -2.577825  | 6.359660  | -5.577866  | -4.147892 |
| 1M7B | A | THR | 68  | T | -2.577937  | 6.358569  | -5.577116  | -4.147754 |
| 1M7B | A | GLN | 69  | T | -2.594677  | 6.257482  | -5.556904  | -4.145417 |
| 1M7B | A | ARG | 70  | E | -4.196115  | 6.837036  | -7.083943  | -4.118037 |
| 1M7B | A | ILE | 71  | E | -6.338169  | 6.693334  | -9.934537  | -4.172471 |
| 1M7B | A | GLU | 72  | E | -9.222845  | 9.832794  | -13.800229 | -5.303463 |
| 1M7B | A | LEU | 73  | E | -12.138006 | 15.910198 | -16.621631 | -6.584502 |
| 1M7B | A | SER | 74  | E | -12.740655 | 13.290262 | -16.599834 | -5.152569 |
| 1M7B | A | LEU | 75  | E | -13.593009 | 15.838396 | -17.058707 | -5.406200 |
| 1M7B | A | TRP | 76  | E | -12.674103 | 14.266903 | -16.983314 | -6.113161 |
| 1M7B | A | ASP | 77  | E | -12.081531 | 11.808354 | -17.596654 | -6.006187 |
| 1M7B | A | THR | 78  | C | -10.449042 | 8.631952  | -15.982602 | -5.412948 |
| 1M7B | A | SER | 79  | C | -8.921749  | 6.339851  | -14.588879 | -4.914523 |
| 1M7B | A | GLY | 80  | C | -7.825623  | 8.085334  | -12.488292 | -4.920784 |
| 1M7B | A | SER | 81  | C | -7.789090  | 8.068877  | -12.588232 | -4.915525 |
| 1M7B | A | PRO | 82  | G | -6.892688  | 8.303423  | -11.094167 | -4.799501 |
| 1M7B | A | TYR | 83  | G | -6.652183  | 8.635115  | -10.819719 | -4.729903 |
| 1M7B | A | TYR | 84  | G | -6.663821  | 8.688194  | -10.747049 | -4.727219 |
| 1M7B | A | ASP | 85  | T | -6.738142  | 8.726968  | -10.568714 | -4.701021 |
| 1M7B | A | ASN | 86  | T | -6.731917  | 8.767689  | -10.548040 | -4.686341 |

|      |   |     |     |   |            |           |            |           |
|------|---|-----|-----|---|------------|-----------|------------|-----------|
| 1M7B | A | VAL | 87  | T | -7.266519  | 9.352010  | -10.366124 | -4.568183 |
| 1M7B | A | ARG | 88  | G | -8.988627  | 10.366154 | -11.558795 | -4.114515 |
| 1M7B | A | PRO | 89  | G | -9.001813  | 10.314236 | -11.500118 | -4.082932 |
| 1M7B | A | LEU | 90  | G | -8.964050  | 10.157326 | -11.698655 | -4.115910 |
| 1M7B | A | SER | 91  | G | -10.187172 | 9.386855  | -14.786002 | -4.692392 |
| 1M7B | A | TYR | 92  | T | -9.844959  | 9.290730  | -14.848100 | -4.936499 |
| 1M7B | A | PRO | 93  | T | -8.206169  | 6.227356  | -13.133114 | -4.456275 |
| 1M7B | A | ASP | 94  | T | -8.169498  | 6.389439  | -13.162534 | -4.463425 |
| 1M7B | A | SER | 95  | T | -8.184443  | 6.329793  | -13.124192 | -4.458443 |
| 1M7B | A | ASP | 96  | C | -8.185823  | 6.329340  | -13.111533 | -4.454630 |
| 1M7B | A | ALA | 97  | E | -8.200387  | 6.281360  | -13.052348 | -4.431152 |
| 1M7B | A | VAL | 98  | E | -9.757569  | 9.655238  | -13.490580 | -4.522380 |
| 1M7B | A | LEU | 99  | E | -11.169835 | 15.863064 | -11.945180 | -4.119878 |
| 1M7B | A | ILE | 100 | E | -11.194277 | 16.040864 | -11.785901 | -4.106469 |
| 1M7B | A | CYS | 101 | E | -11.385683 | 16.213460 | -11.580561 | -4.099068 |
| 1M7B | A | PHE | 102 | E | -12.818411 | 18.333395 | -13.886871 | -4.790877 |
| 1M7B | A | ASP | 103 | E | -13.082430 | 15.937629 | -16.088215 | -5.158550 |
| 1M7B | A | ILE | 104 | T | -12.482259 | 12.969570 | -16.194194 | -4.913945 |
| 1M7B | A | SER | 105 | T | -11.746978 | 10.889892 | -16.440117 | -5.089940 |
| 1M7B | A | ARG | 106 | T | -11.514232 | 11.336173 | -16.045124 | -4.997944 |
| 1M7B | A | PRO | 107 | H | -9.591344  | 11.857378 | -12.410959 | -4.866503 |
| 1M7B | A | GLU | 108 | H | -9.484482  | 11.795561 | -12.705837 | -4.934316 |
| 1M7B | A | THR | 109 | H | -9.469543  | 11.853193 | -12.721407 | -4.932068 |
| 1M7B | A | LEU | 110 | H | -9.476348  | 11.886831 | -12.672441 | -4.928613 |
| 1M7B | A | ASP | 111 | H | -9.304313  | 11.211443 | -12.942838 | -4.818265 |
| 1M7B | A | SER | 112 | H | -9.801357  | 10.246541 | -14.017838 | -4.762162 |
| 1M7B | A | VAL | 113 | H | -9.991722  | 9.815841  | -13.954212 | -4.566949 |
| 1M7B | A | LEU | 114 | H | -10.031894 | 9.542512  | -13.984651 | -4.554013 |
| 1M7B | A | LYS | 115 | H | -10.030663 | 9.544707  | -14.013367 | -4.573534 |
| 1M7B | A | LYS | 116 | H | -11.312348 | 11.444442 | -15.753394 | -5.148071 |
| 1M7B | A | TRP | 117 | H | -12.056581 | 14.395441 | -16.350153 | -5.878305 |
| 1M7B | A | LYS | 118 | H | -11.354550 | 12.040545 | -16.296211 | -5.855082 |
| 1M7B | A | GLY | 119 | H | -10.172316 | 10.193598 | -15.074460 | -5.478077 |
| 1M7B | A | GLU | 120 | H | -10.082333 | 10.667010 | -14.890192 | -5.441482 |
| 1M7B | A | ILE | 121 | H | -9.665864  | 11.987168 | -13.569055 | -5.210712 |
| 1M7B | A | GLN | 122 | H | -8.750779  | 9.864830  | -12.783587 | -4.858817 |
| 1M7B | A | GLU | 123 | H | -6.999648  | 7.951190  | -10.559425 | -4.407888 |
| 1M7B | A | PHE | 124 | H | -6.724091  | 8.476917  | -10.454418 | -4.483845 |
| 1M7B | A | CYS | 125 | H | -6.648896  | 8.290383  | -10.726446 | -4.526276 |
| 1M7B | A | PRO | 126 | T | -6.634894  | 8.308435  | -10.766737 | -4.533661 |
| 1M7B | A | ASN | 127 | T | -6.647737  | 8.289867  | -10.727900 | -4.528940 |
| 1M7B | A | THR | 128 | T | -7.087167  | 8.775511  | -11.043916 | -4.688372 |
| 1M7B | A | LYS | 129 | E | -7.783325  | 7.448189  | -12.689086 | -4.846614 |
| 1M7B | A | MET | 130 | E | -8.767711  | 9.717501  | -12.456035 | -4.865885 |
| 1M7B | A | LEU | 131 | E | -10.491522 | 14.430935 | -12.856850 | -4.847960 |
| 1M7B | A | LEU | 132 | E | -10.782153 | 14.850176 | -12.593093 | -4.578943 |
| 1M7B | A | VAL | 133 | E | -10.724425 | 14.342729 | -13.013080 | -4.637235 |
| 1M7B | A | GLY | 134 | E | -10.719887 | 14.284796 | -13.078616 | -4.650546 |
| 1M7B | A | CYS | 135 | E | -10.879945 | 13.342877 | -13.591066 | -4.682974 |
| 1M7B | A | LYS | 136 | T | -11.605922 | 10.876979 | -16.627473 | -5.193713 |
| 1M7B | A | SER | 137 | G | -11.553047 | 10.278264 | -17.049854 | -5.340629 |
| 1M7B | A | ASP | 138 | G | -11.449556 | 10.177468 | -17.013992 | -5.382379 |
| 1M7B | A | LEU | 139 | G | -10.314732 | 8.659797  | -15.020963 | -4.646773 |
| 1M7B | A | ARG | 140 | T | -8.691352  | 5.897568  | -13.474809 | -4.043093 |
| 1M7B | A | THR | 141 | T | -5.652375  | 5.804028  | -9.068846  | -3.830842 |
| 1M7B | A | ASP | 142 | T | -5.633485  | 5.863508  | -9.120206  | -3.832242 |
| 1M7B | A | VAL | 143 | H | -5.617644  | 5.886883  | -9.171087  | -3.827781 |
| 1M7B | A | SER | 144 | H | -5.617220  | 5.888684  | -9.174058  | -3.828113 |
| 1M7B | A | THR | 145 | H | -5.620214  | 5.890640  | -9.153202  | -3.827543 |
| 1M7B | A | LEU | 146 | H | -7.287403  | 7.373704  | -11.069844 | -3.882190 |
| 1M7B | A | VAL | 147 | H | -7.668327  | 7.218063  | -11.669854 | -4.016745 |
| 1M7B | A | GLU | 148 | H | -8.133885  | 7.698232  | -13.511146 | -4.833600 |
| 1M7B | A | LEU | 149 | H | -7.172390  | 5.937399  | -11.388279 | -3.782622 |
| 1M7B | A | SER | 150 | H | -5.837251  | 3.945716  | -10.620331 | -3.806922 |
| 1M7B | A | ASN | 151 | H | -5.261934  | 3.949842  | -10.046882 | -3.736308 |
| 1M7B | A | HIS | 152 | C | -5.121594  | 4.682916  | -9.625502  | -3.654468 |
| 1M7B | A | ARG | 153 | C | -5.109044  | 4.819457  | -9.570395  | -3.641156 |
| 1M7B | A | GLN | 154 | C | -5.123995  | 4.801887  | -9.536173  | -3.643889 |
| 1M7B | A | THR | 155 | C | -5.309317  | 5.201798  | -9.169964  | -3.582501 |
| 1M7B | A | PRO | 156 | C | -5.972849  | 7.768828  | -8.065822  | -3.344780 |
| 1M7B | A | VAL | 157 | C | -7.281802  | 10.490365 | -8.033594  | -3.248514 |
| 1M7B | A | SER | 158 | C | -8.650685  | 8.762126  | -13.323429 | -4.833630 |
| 1M7B | A | TYR | 159 | H | -8.355303  | 8.551295  | -13.352757 | -4.963105 |
| 1M7B | A | ASP | 160 | H | -7.470132  | 6.651950  | -13.052577 | -4.974308 |
| 1M7B | A | GLN | 161 | H | -7.468465  | 6.630595  | -13.080222 | -4.982165 |
| 1M7B | A | GLY | 162 | H | -7.465896  | 6.652810  | -13.085233 | -4.986228 |
| 1M7B | A | ALA | 163 | H | -7.494288  | 6.605650  | -13.044475 | -4.950913 |
| 1M7B | A | ASN | 164 | H | -7.486722  | 6.547735  | -13.005428 | -4.891686 |
| 1M7B | A | MET | 165 | H | -8.375393  | 8.608398  | -13.060119 | -4.561947 |
| 1M7B | A | ALA | 166 | H | -6.993371  | 8.178367  | -10.455589 | -4.312163 |
| 1M7B | A | LYS | 167 | H | -6.204856  | 8.648524  | -9.426261  | -4.346557 |

|      |   |     |     |   |            |           |            |           |
|------|---|-----|-----|---|------------|-----------|------------|-----------|
| 1M7B | A | GLN | 168 | H | -6.131602  | 8.858048  | -9.426890  | -4.353237 |
| 1M7B | A | ILE | 169 | H | -5.918341  | 9.368820  | -8.988395  | -4.259025 |
| 1M7B | A | GLY | 170 | C | -5.904971  | 9.437715  | -8.998153  | -4.262975 |
| 1M7B | A | ALA | 171 | C | -5.996514  | 9.667203  | -8.795645  | -4.257708 |
| 1M7B | A | ALA | 172 | C | -6.429341  | 10.587749 | -8.503354  | -4.147608 |
| 1M7B | A | THR | 173 | E | -6.562718  | 10.649369 | -8.226790  | -4.084036 |
| 1M7B | A | TYR | 174 | E | -8.064922  | 12.639796 | -9.656047  | -4.430145 |
| 1M7B | A | ILE | 175 | E | -9.554463  | 15.208511 | -10.168709 | -4.242033 |
| 1M7B | A | GLU | 176 | E | -10.275471 | 15.404316 | -11.825497 | -4.943875 |
| 1M7B | A | CYS | 177 | C | -9.852686  | 10.086607 | -13.918311 | -4.963406 |
| 1M7B | A | SER | 178 | B | -8.454084  | 9.249630  | -12.036098 | -4.573880 |
| 1M7B | A | ALA | 179 | T | -8.104494  | 9.632474  | -11.909930 | -4.658938 |
| 1M7B | A | LEU | 180 | T | -7.823350  | 8.890231  | -12.556040 | -4.914817 |
| 1M7B | A | GLN | 181 | T | -7.792020  | 8.788429  | -12.701583 | -4.938272 |
| 1M7B | A | SER | 182 | B | -7.806911  | 8.757214  | -12.682493 | -4.938856 |
| 1M7B | A | GLU | 183 | H | -8.015588  | 8.588501  | -13.064397 | -5.111007 |
| 1M7B | A | ASN | 184 | H | -8.294836  | 7.659452  | -13.895236 | -5.317290 |
| 1M7B | A | SER | 185 | H | -9.374115  | 7.590821  | -15.302909 | -5.214381 |
| 1M7B | A | VAL | 186 | H | -10.212272 | 9.506872  | -14.979272 | -4.705530 |
| 1M7B | A | ARG | 187 | H | -10.354892 | 9.781235  | -14.714009 | -4.646112 |
| 1M7B | A | ASP | 188 | H | -10.500674 | 12.833562 | -13.123566 | -4.484977 |
| 1M7B | A | ILE | 189 | H | -10.775585 | 17.211029 | -10.920765 | -4.304447 |
| 1M7B | A | PHE | 190 | H | -10.630559 | 17.350158 | -10.938907 | -4.365200 |
| 1M7B | A | HIS | 191 | H | -10.052413 | 14.071159 | -11.661023 | -4.214699 |
| 1M7B | A | VAL | 192 | H | -9.816287  | 13.386771 | -11.844353 | -4.147071 |
| 1M7B | A | ALA | 193 | H | -9.892455  | 12.826099 | -12.130062 | -4.169246 |
| 1M7B | A | THR | 194 | H | -9.816083  | 12.355053 | -12.921284 | -4.590198 |
| 1M7B | A | LEU | 195 | H | -9.164429  | 10.159454 | -14.055665 | -5.332244 |
| 1M7B | A | ALA | 196 | H | -8.444270  | 7.943093  | -13.570729 | -4.966813 |
| 1M7B | A | CYS | 197 | H | -6.400721  | 5.424396  | -10.511801 | -3.983363 |
| 1M7B | A | VAL | 198 | H | -6.400721  | 5.424396  | -10.511801 | -3.983363 |
| 1M7B | A | ASN | 199 | C | -6.400721  | 5.424396  | -10.511801 | -3.983363 |
| 1M7B | A | LYS | 200 | C | -6.400721  | 5.424396  | -10.511801 | -3.983363 |
| 1M9Z | A | ALA | 26  | C | -11.406451 | 9.212287  | -15.779298 | -4.611586 |
| 1M9Z | A | LEU | 27  | E | -11.406451 | 9.212287  | -15.779298 | -4.611586 |
| 1M9Z | A | CYS | 28  | E | -11.406451 | 9.212287  | -15.779298 | -4.611586 |
| 1M9Z | A | LYS | 29  | E | -11.406451 | 9.212287  | -15.779298 | -4.611586 |
| 1M9Z | A | PHE | 30  | C | -10.046627 | 9.662688  | -13.981834 | -4.773691 |
| 1M9Z | A | CYS | 31  | T | -8.348267  | 8.047191  | -12.653336 | -4.653449 |
| 1M9Z | A | ASP | 32  | E | -8.297835  | 8.169055  | -12.739812 | -4.662964 |
| 1M9Z | A | VAL | 33  | E | -7.758120  | 8.378629  | -12.076973 | -4.534619 |
| 1M9Z | A | ARG | 34  | E | -7.665687  | 8.232521  | -12.305529 | -4.575335 |
| 1M9Z | A | PHE | 35  | E | -7.590960  | 8.127859  | -12.528293 | -4.675641 |
| 1M9Z | A | SER | 36  | C | -7.390321  | 6.812160  | -13.286290 | -4.989748 |
| 1M9Z | A | THR | 37  | C | -6.912129  | 5.283810  | -13.692174 | -5.175954 |
| 1M9Z | A | CYS | 38  | T | -6.988903  | 4.739903  | -14.099638 | -5.304842 |
| 1M9Z | A | ASP | 39  | T | -6.735272  | 5.041768  | -13.712473 | -5.271413 |
| 1M9Z | A | ASN | 40  | T | -6.707716  | 5.002303  | -13.740782 | -5.257964 |
| 1M9Z | A | GLN | 41  | T | -6.802729  | 4.957209  | -13.675571 | -5.246092 |
| 1M9Z | A | LYS | 42  | T | -7.173363  | 5.692731  | -13.389025 | -5.184438 |
| 1M9Z | A | SER | 43  | E | -7.167036  | 5.777148  | -13.351440 | -5.179700 |
| 1M9Z | A | CYS | 44  | E | -7.938141  | 5.878078  | -14.702896 | -5.275314 |
| 1M9Z | A | MET | 45  | E | -7.735994  | 5.876898  | -14.307852 | -5.280932 |
| 1M9Z | A | SER | 46  | C | -7.574870  | 5.543652  | -14.426559 | -5.214476 |
| 1M9Z | A | ASN | 47  | C | -7.188989  | 5.315990  | -14.020934 | -5.122649 |
| 1M9Z | A | CYS | 48  | C | -7.196648  | 5.270794  | -14.005562 | -5.099551 |
| 1M9Z | A | SER | 49  | C | -6.384028  | 5.671854  | -11.127040 | -4.107342 |
| 1M9Z | A | ILE | 50  | C | -6.392930  | 5.720354  | -11.007198 | -4.042197 |
| 1M9Z | A | THR | 51  | E | -6.200162  | 5.886289  | -11.147564 | -4.240953 |
| 1M9Z | A | SER | 52  | E | -6.022275  | 5.719665  | -11.242747 | -4.346474 |
| 1M9Z | A | ILE | 53  | E | -5.037828  | 3.882756  | -10.614240 | -4.383279 |
| 1M9Z | A | CYS | 54  | T | -5.061468  | 3.717374  | -10.758475 | -4.455109 |
| 1M9Z | A | GLU | 55  | T | -4.985742  | 3.941387  | -10.837220 | -4.523675 |
| 1M9Z | A | LYS | 56  | T | -5.007415  | 3.866637  | -10.804363 | -4.514826 |
| 1M9Z | A | PRO | 57  | T | -5.043139  | 3.784745  | -10.734253 | -4.501813 |
| 1M9Z | A | GLN | 58  | T | -6.053646  | 5.270088  | -11.917127 | -4.994852 |
| 1M9Z | A | GLU | 59  | T | -6.199728  | 5.714542  | -11.496752 | -4.996884 |
| 1M9Z | A | VAL | 60  | E | -8.328330  | 9.176888  | -12.738819 | -4.981659 |
| 1M9Z | A | CYS | 61  | E | -9.395901  | 10.259121 | -13.596771 | -4.861976 |
| 1M9Z | A | VAL | 62  | E | -10.105972 | 12.332485 | -12.348568 | -4.089969 |
| 1M9Z | A | ALA | 63  | E | -10.124062 | 12.317588 | -12.209743 | -4.033951 |
| 1M9Z | A | VAL | 64  | E | -10.252940 | 12.274481 | -11.847652 | -3.880551 |
| 1M9Z | A | TRP | 65  | E | -12.163908 | 15.732235 | -13.272559 | -4.515404 |
| 1M9Z | A | ARG | 66  | E | -9.947271  | 7.344643  | -16.233698 | -5.659023 |
| 1M9Z | A | LYS | 67  | E | -5.166138  | 4.806228  | -10.919833 | -5.281990 |
| 1M9Z | A | ASN | 68  | E | -4.144463  | 5.820917  | -9.003552  | -4.957083 |
| 1M9Z | A | ASP | 69  | T | -4.125558  | 5.886460  | -9.038044  | -4.955493 |
| 1M9Z | A | GLU | 70  | T | -4.125531  | 5.886776  | -9.038217  | -4.955505 |
| 1M9Z | A | ASN | 71  | E | -4.125563  | 5.886698  | -9.037827  | -4.955466 |
| 1M9Z | A | ILE | 72  | E | -4.238034  | 6.110733  | -8.641929  | -4.885636 |
| 1M9Z | A | THR | 73  | E | -6.176254  | 7.904554  | -10.089396 | -4.897832 |

|      |   |     |     |   |            |           |            |           |
|------|---|-----|-----|---|------------|-----------|------------|-----------|
| 1M9Z | A | LEU | 74  | E | -10.049689 | 12.915761 | -12.892814 | -5.215181 |
| 1M9Z | A | GLU | 75  | E | -12.555354 | 15.378036 | -16.385840 | -5.546644 |
| 1M9Z | A | THR | 76  | E | -11.482235 | 13.421330 | -15.252834 | -5.497490 |
| 1M9Z | A | VAL | 77  | E | -11.311876 | 13.391197 | -15.100751 | -5.338012 |
| 1M9Z | A | CYS | 78  | E | -9.490924  | 11.393385 | -12.842818 | -5.018010 |
| 1M9Z | A | HIS | 79  | E | -7.591931  | 9.871770  | -10.323611 | -4.368898 |
| 1M9Z | A | ASP | 80  | T | -5.818026  | 8.590711  | -8.096825  | -3.873704 |
| 1M9Z | A | PRO | 81  | T | -5.815682  | 8.605355  | -8.105421  | -3.874100 |
| 1M9Z | A | LYS | 82  | T | -5.814963  | 8.608963  | -8.110678  | -3.875060 |
| 1M9Z | A | LEU | 83  | T | -5.815705  | 8.605501  | -8.105394  | -3.873579 |
| 1M9Z | A | PRO | 84  | T | -5.844224  | 8.549869  | -8.003324  | -3.851421 |
| 1M9Z | A | TYR | 85  | B | -8.766753  | 12.290754 | -11.352123 | -4.395042 |
| 1M9Z | A | HIS | 86  | T | -9.255000  | 12.375071 | -12.784080 | -4.961294 |
| 1M9Z | A | ASP | 87  | T | -7.917615  | 11.877927 | -9.985841  | -4.518262 |
| 1M9Z | A | PHE | 88  | B | -7.915787  | 11.886998 | -9.981794  | -4.514464 |
| 1M9Z | A | ILE | 89  | C | -7.679574  | 10.830111 | -10.435422 | -4.406257 |
| 1M9Z | A | LEU | 90  | T | -7.597772  | 10.470642 | -10.749435 | -4.420551 |
| 1M9Z | A | GLU | 91  | T | -7.466001  | 9.362151  | -11.375040 | -4.421399 |
| 1M9Z | A | ASP | 92  | T | -7.764735  | 7.295176  | -12.764019 | -4.371611 |
| 1M9Z | A | ALA | 93  | T | -6.844911  | 6.079041  | -11.466672 | -4.102694 |
| 1M9Z | A | ALA | 94  | T | -6.516878  | 5.635197  | -11.698777 | -4.312402 |
| 1M9Z | A | SER | 95  | T | -6.501138  | 5.683703  | -11.712545 | -4.320780 |
| 1M9Z | A | PRO | 96  | C | -6.518568  | 5.761711  | -11.640125 | -4.326762 |
| 1M9Z | A | THR | 97  | C | -6.523101  | 5.771200  | -11.616086 | -4.328247 |
| 1M9Z | A | CYS | 98  | E | -6.885919  | 5.787796  | -12.041573 | -4.584025 |
| 1M9Z | A | ILE | 99  | E | -8.132717  | 8.670142  | -12.738105 | -4.809627 |
| 1M9Z | A | MET | 100 | C | -8.214077  | 11.215084 | -12.456170 | -5.496029 |
| 1M9Z | A | LYS | 101 | E | -7.511321  | 11.241557 | -11.469942 | -5.582997 |
| 1M9Z | A | GLU | 102 | E | -5.984603  | 9.179233  | -9.738132  | -5.146659 |
| 1M9Z | A | LYS | 103 | E | -4.936788  | 7.454175  | -9.396952  | -5.113523 |
| 1M9Z | A | LYS | 104 | C | -4.326661  | 5.873708  | -9.596334  | -5.043155 |
| 1M9Z | A | LYS | 105 | T | -4.276555  | 5.967858  | -9.675037  | -5.068950 |
| 1M9Z | A | PRO | 106 | T | -4.275021  | 5.982734  | -9.673665  | -5.068790 |
| 1M9Z | A | GLY | 107 | T | -4.306446  | 5.817553  | -9.677154  | -5.066148 |
| 1M9Z | A | GLU | 108 | T | -4.506501  | 5.300491  | -9.813891  | -5.047966 |
| 1M9Z | A | THR | 109 | E | -5.718583  | 7.362717  | -10.551863 | -5.354957 |
| 1M9Z | A | PHE | 110 | E | -7.326557  | 11.441124 | -10.287986 | -5.334362 |
| 1M9Z | A | PHE | 111 | E | -10.705282 | 17.567191 | -13.925705 | -6.875504 |
| 1M9Z | A | MET | 112 | E | -12.659582 | 16.156897 | -16.624467 | -6.024257 |
| 1M9Z | A | CYS | 113 | E | -12.426083 | 12.109895 | -18.088193 | -5.745006 |
| 1M9Z | A | SER | 114 | E | -10.740354 | 6.719260  | -17.147520 | -5.203810 |
| 1M9Z | A | CYS | 115 | E | -9.117968  | 6.643958  | -15.079277 | -5.171907 |
| 1M9Z | A | SER | 116 | C | -8.775392  | 6.463975  | -15.109290 | -5.125355 |
| 1M9Z | A | SER | 117 | T | -8.763503  | 6.461604  | -15.170141 | -5.136117 |
| 1M9Z | A | ASP | 118 | T | -8.727493  | 6.555967  | -15.288383 | -5.203399 |
| 1M9Z | A | GLU | 119 | T | -8.741486  | 6.572923  | -15.262972 | -5.217285 |
| 1M9Z | A | CYS | 120 | G | -9.141586  | 6.538371  | -15.605701 | -5.272436 |
| 1M9Z | A | ASN | 121 | G | -10.124292 | 7.998600  | -17.587416 | -6.170532 |
| 1M9Z | A | ASP | 122 | G | -10.252079 | 8.466093  | -17.417912 | -6.290182 |
| 1M9Z | A | ASN | 123 | E | -11.122598 | 10.566329 | -18.077111 | -6.495509 |
| 1M9Z | A | ILE | 124 | E | -10.380982 | 17.953410 | -13.437427 | -7.063716 |
| 1M9Z | A | ILE | 125 | E | -8.149768  | 14.779961 | -10.839627 | -6.259759 |
| 1M9Z | A | PHE | 126 | C | -6.161683  | 12.460102 | -8.537705  | -5.488032 |
| 1M9Z | A | SER | 127 | C | -3.592370  | 7.140632  | -6.575245  | -4.397589 |
| 1M9Z | A | GLU | 128 | C | -3.592370  | 7.140632  | -6.575245  | -4.397589 |
| 1M9Z | A | GLU | 129 | C | -3.592370  | 7.140632  | -6.575245  | -4.397589 |
| 1M9Z | A | TYR | 130 | C | -3.592370  | 7.140632  | -6.575245  | -4.397589 |
| 1MFM | A | ALA | 1   | C | -6.154258  | 7.934343  | -8.233098  | -3.435340 |
| 1MFM | A | THR | 2   | E | -6.154258  | 7.934343  | -8.233098  | -3.435340 |
| 1MFM | A | LYS | 3   | E | -6.154258  | 7.934343  | -8.233098  | -3.435340 |
| 1MFM | A | ALA | 4   | E | -6.154258  | 7.934343  | -8.233098  | -3.435340 |
| 1MFM | A | VAL | 5   | E | -8.584911  | 11.207886 | -10.576028 | -3.861414 |
| 1MFM | A | ALA | 6   | E | -8.338225  | 11.060192 | -10.178345 | -3.813066 |
| 1MFM | A | VAL | 7   | E | -6.452906  | 8.737936  | -8.918123  | -4.009620 |
| 1MFM | A | LEU | 8   | E | -4.805905  | 7.610844  | -7.820695  | -4.352688 |
| 1MFM | A | LYS | 9   | B | -3.142344  | 3.581937  | -7.478092  | -4.095029 |
| 1MFM | A | GLY | 10  | C | -2.436287  | 4.225334  | -6.414345  | -3.915617 |
| 1MFM | A | ASP | 11  | C | -2.422961  | 4.285058  | -6.440229  | -3.918582 |
| 1MFM | A | GLY | 12  | C | -2.423294  | 4.282098  | -6.439456  | -3.918584 |
| 1MFM | A | PRO | 13  | C | -2.433656  | 4.222373  | -6.412833  | -3.908291 |
| 1MFM | A | VAL | 14  | C | -2.637082  | 4.549679  | -5.931142  | -3.803534 |
| 1MFM | A | GLN | 15  | E | -4.679875  | 6.819151  | -7.455151  | -3.931982 |
| 1MFM | A | GLY | 16  | E | -6.819521  | 8.201446  | -10.305636 | -4.269729 |
| 1MFM | A | ILE | 17  | E | -8.044649  | 10.740238 | -11.204871 | -4.331877 |
| 1MFM | A | ILE | 18  | E | -8.399331  | 11.168615 | -11.215922 | -4.402527 |
| 1MFM | A | ASN | 19  | E | -8.791142  | 10.485688 | -11.725280 | -4.528442 |
| 1MFM | A | PHE | 20  | E | -10.522201 | 14.617896 | -11.381276 | -4.265502 |
| 1MFM | A | GLU | 21  | E | -10.587383 | 9.366863  | -16.162619 | -5.687650 |
| 1MFM | A | GLN | 22  | E | -8.699785  | 6.022301  | -14.873159 | -5.316076 |
| 1MFM | A | LYS | 23  | T | -4.681421  | 4.645916  | -9.524998  | -4.733316 |
| 1MFM | A | GLU | 24  | T | -4.330548  | 4.874759  | -9.381435  | -4.653886 |



|      |   |     |     |   |            |           |            |           |
|------|---|-----|-----|---|------------|-----------|------------|-----------|
| 1MFM | A | SER | 25  | T | -4.298313  | 5.043498  | -9.363374  | -4.636751 |
| 1MFM | A | ASN | 26  | T | -4.277581  | 5.167219  | -9.353006  | -4.629143 |
| 1MFM | A | GLY | 27  | T | -4.277404  | 5.172550  | -9.350276  | -4.628268 |
| 1MFM | A | PRO | 28  | C | -4.694534  | 5.708747  | -9.171223  | -4.518214 |
| 1MFM | A | VAL | 29  | E | -5.728421  | 8.331651  | -9.047494  | -4.355310 |
| 1MFM | A | LYS | 30  | E | -6.257081  | 8.735628  | -9.081672  | -4.400374 |
| 1MFM | A | VAL | 31  | E | -8.296920  | 12.189576 | -10.079307 | -4.094826 |
| 1MFM | A | TRP | 32  | E | -8.878779  | 12.598610 | -11.468954 | -4.388474 |
| 1MFM | A | GLY | 33  | E | -7.723878  | 9.231205  | -10.991133 | -4.368421 |
| 1MFM | A | SER | 34  | E | -7.703400  | 9.353246  | -10.955899 | -4.359730 |
| 1MFM | A | ILE | 35  | E | -7.329220  | 10.577466 | -10.192725 | -4.365498 |
| 1MFM | A | LYS | 36  | E | -6.290525  | 10.046487 | -9.053667  | -4.536072 |
| 1MFM | A | GLY | 37  | C | -5.373850  | 8.214278  | -8.727590  | -4.480659 |
| 1MFM | A | LEU | 38  | C | -5.240658  | 8.253055  | -8.733420  | -4.447326 |
| 1MFM | A | THR | 39  | C | -5.226865  | 8.225585  | -8.795928  | -4.449267 |
| 1MFM | A | GLU | 40  | C | -5.230826  | 8.171102  | -8.815431  | -4.453983 |
| 1MFM | A | GLY | 41  | E | -5.319272  | 7.885096  | -8.814438  | -4.435074 |
| 1MFM | A | LEU | 42  | E | -6.070759  | 8.297906  | -9.251775  | -4.356268 |
| 1MFM | A | HIS | 43  | E | -7.281433  | 7.436727  | -11.704937 | -4.619966 |
| 1MFM | A | GLY | 44  | E | -8.150720  | 7.891264  | -12.697484 | -4.964697 |
| 1MFM | A | PHE | 45  | E | -10.981226 | 12.686525 | -13.758392 | -4.885010 |
| 1MFM | A | HIS | 46  | E | -12.887360 | 16.561617 | -15.134490 | -5.050882 |
| 1MFM | A | VAL | 47  | E | -12.813421 | 15.639426 | -17.167299 | -6.203312 |
| 1MFM | A | HIS | 48  | E | -11.888487 | 10.436697 | -18.591877 | -6.392951 |
| 1MFM | A | GLU | 49  | C | -7.335784  | 5.864870  | -13.299812 | -5.452717 |
| 1MFM | A | GLU | 50  | C | -5.819796  | 4.709971  | -11.943688 | -5.252416 |
| 1MFM | A | GLU | 51  | C | -3.820635  | 3.047481  | -9.162897  | -4.565505 |
| 1MFM | A | ASP | 52  | C | -2.973408  | 2.452339  | -8.613002  | -4.472425 |
| 1MFM | A | ASN | 53  | C | -2.907087  | 2.534476  | -8.735312  | -4.500787 |
| 1MFM | A | THR | 54  | C | -2.896327  | 2.546535  | -8.775662  | -4.504079 |
| 1MFM | A | ALA | 55  | T | -2.899274  | 2.534025  | -8.761825  | -4.499341 |
| 1MFM | A | GLY | 56  | T | -3.036100  | 2.409281  | -8.658286  | -4.475297 |
| 1MFM | A | CYS | 57  | T | -4.138344  | 3.214123  | -9.905493  | -4.682682 |
| 1MFM | A | THR | 58  | T | -5.202885  | 3.320417  | -11.172898 | -4.680543 |
| 1MFM | A | SER | 59  | T | -6.549164  | 3.958745  | -13.351488 | -5.006462 |
| 1MFM | A | ALA | 60  | T | -7.606080  | 6.377983  | -15.226060 | -5.971084 |
| 1MFM | A | GLY | 61  | C | -7.905958  | 6.405776  | -14.388225 | -5.307639 |
| 1MFM | A | PRO | 62  | C | -8.126311  | 6.318379  | -13.203075 | -4.524676 |
| 1MFM | A | HIS | 63  | B | -9.610523  | 9.898610  | -13.972527 | -4.883462 |
| 1MFM | A | PHE | 64  | C | -8.608630  | 12.506089 | -10.148729 | -4.348601 |
| 1MFM | A | ASN | 65  | T | -7.823461  | 9.650932  | -10.655523 | -4.117482 |
| 1MFM | A | PRO | 66  | T | -7.465581  | 9.290506  | -10.480002 | -3.969932 |
| 1MFM | A | LEU | 67  | T | -7.456707  | 9.281219  | -10.526403 | -3.975747 |
| 1MFM | A | SER | 68  | T | -7.453721  | 9.275435  | -10.548077 | -3.978838 |
| 1MFM | A | ARG | 69  | C | -7.536024  | 8.784988  | -10.663579 | -3.934059 |
| 1MFM | A | LYS | 70  | C | -7.772247  | 9.140773  | -10.770951 | -4.019086 |
| 1MFM | A | HIS | 71  | C | -8.506292  | 9.658302  | -12.623899 | -4.717999 |
| 1MFM | A | GLY | 72  | C | -8.095698  | 7.468540  | -13.237718 | -4.706383 |
| 1MFM | A | GLY | 73  | T | -7.919900  | 6.704117  | -13.620234 | -4.724987 |
| 1MFM | A | PRO | 74  | T | -7.907637  | 6.622102  | -13.699936 | -4.734966 |
| 1MFM | A | LYS | 75  | T | -8.071367  | 5.469563  | -14.259557 | -4.723440 |
| 1MFM | A | ASP | 76  | T | -8.125063  | 5.230153  | -14.296801 | -4.731633 |
| 1MFM | A | GLU | 77  | T | -8.629279  | 4.762574  | -14.921396 | -4.816019 |
| 1MFM | A | GLU | 78  | T | -9.940549  | 5.326216  | -16.517471 | -5.167070 |
| 1MFM | A | ARG | 79  | T | -14.039419 | 8.954787  | -21.691771 | -5.870893 |
| 1MFM | A | HIS | 80  | T | -12.955987 | 14.392577 | -15.822270 | -5.086618 |
| 1MFM | A | VAL | 81  | T | -10.669632 | 12.852752 | -12.883264 | -4.647143 |
| 1MFM | A | GLY | 82  | T | -10.364711 | 12.213856 | -13.699522 | -4.946474 |
| 1MFM | A | ASP | 83  | E | -10.290392 | 12.307486 | -13.753802 | -4.939841 |
| 1MFM | A | LEU | 84  | E | -9.110208  | 13.013820 | -10.981161 | -4.531816 |
| 1MFM | A | GLY | 85  | E | -8.422437  | 11.059774 | -11.056432 | -4.294914 |
| 1MFM | A | ASN | 86  | E | -8.398907  | 10.933915 | -11.140124 | -4.277441 |
| 1MFM | A | VAL | 87  | E | -8.370913  | 10.808392 | -11.222356 | -4.249936 |
| 1MFM | A | THR | 88  | E | -7.974665  | 8.398042  | -12.139946 | -4.277037 |
| 1MFM | A | ALA | 89  | E | -7.468790  | 5.646603  | -12.991394 | -4.436150 |
| 1MFM | A | ASP | 90  | T | -6.416890  | 4.348270  | -12.206006 | -4.598377 |
| 1MFM | A | LYS | 91  | T | -6.388474  | 4.421947  | -12.232973 | -4.587771 |
| 1MFM | A | ASP | 92  | T | -6.369506  | 4.457233  | -12.257739 | -4.575901 |
| 1MFM | A | GLY | 93  | T | -6.378782  | 4.479338  | -12.218743 | -4.572045 |
| 1MFM | A | VAL | 94  | C | -6.404199  | 4.756542  | -11.959945 | -4.503945 |
| 1MFM | A | ALA | 95  | E | -7.309289  | 7.853942  | -11.160456 | -3.755288 |
| 1MFM | A | ASP | 96  | E | -7.032706  | 9.177689  | -9.849247  | -3.695339 |
| 1MFM | A | VAL | 97  | E | -7.091250  | 9.582826  | -9.508917  | -3.641766 |
| 1MFM | A | SER | 98  | E | -7.111569  | 9.632551  | -9.456246  | -3.643377 |
| 1MFM | A | ILE | 99  | E | -7.230012  | 9.796489  | -9.416389  | -3.718665 |
| 1MFM | A | GLU | 100 | E | -7.305710  | 10.036572 | -9.538612  | -3.925939 |
| 1MFM | A | ASP | 101 | E | -8.248325  | 10.543858 | -11.688015 | -4.431704 |
| 1MFM | A | SER | 102 | T | -8.070688  | 11.398624 | -10.927193 | -4.322133 |
| 1MFM | A | VAL | 103 | T | -8.148764  | 11.760867 | -10.706740 | -4.342210 |
| 1MFM | A | ILE | 104 | T | -8.187212  | 11.987773 | -10.599861 | -4.368016 |
| 1MFM | A | SER | 105 | C | -7.679999  | 9.506337  | -11.724364 | -4.955412 |

|      |   |     |     |   |            |           |            |           |
|------|---|-----|-----|---|------------|-----------|------------|-----------|
| 1MFM | A | LEU | 106 | C | -5.629055  | 9.123739  | -8.897118  | -5.043234 |
| 1MFM | A | SER | 107 | C | -5.321932  | 7.814972  | -9.542402  | -4.958161 |
| 1MFM | A | GLY | 108 | T | -5.057131  | 8.070037  | -9.105474  | -4.762366 |
| 1MFM | A | ASP | 109 | T | -5.054906  | 8.087086  | -9.105771  | -4.760146 |
| 1MFM | A | HIS | 110 | T | -5.060224  | 8.083776  | -9.077945  | -4.756065 |
| 1MFM | A | SER | 111 | T | -5.335298  | 7.475247  | -9.235146  | -4.584743 |
| 1MFM | A | ILE | 112 | T | -5.654704  | 8.571019  | -8.343500  | -4.411749 |
| 1MFM | A | ILE | 113 | T | -8.271294  | 12.677540 | -9.630039  | -4.254557 |
| 1MFM | A | GLY | 114 | T | -9.654711  | 13.512710 | -11.936247 | -4.620209 |
| 1MFM | A | ARG | 115 | E | -10.295309 | 13.627021 | -12.803818 | -4.746554 |
| 1MFM | A | THR | 116 | E | -10.816990 | 15.136646 | -12.812797 | -4.831230 |
| 1MFM | A | LEU | 117 | E | -11.311979 | 15.475342 | -13.351938 | -4.654600 |
| 1MFM | A | VAL | 118 | E | -11.558934 | 15.517714 | -13.489251 | -4.526305 |
| 1MFM | A | VAL | 119 | E | -11.392742 | 13.874365 | -14.190005 | -4.581903 |
| 1MFM | A | HIS | 120 | E | -11.376002 | 13.316948 | -14.591059 | -4.658791 |
| 1MFM | A | GLU | 121 | C | -11.364881 | 11.107792 | -16.043243 | -4.892682 |
| 1MFM | A | LYS | 122 | C | -11.497948 | 9.378421  | -17.256062 | -5.039915 |
| 1MFM | A | ALA | 123 | C | -10.909838 | 8.043631  | -16.881619 | -4.964339 |
| 1MFM | A | ASP | 124 | C | -10.708672 | 6.946568  | -17.364393 | -5.058336 |
| 1MFM | A | ASP | 125 | T | -8.117519  | 4.854803  | -14.481077 | -5.123891 |
| 1MFM | A | LEU | 126 | T | -5.393337  | 3.991809  | -11.021733 | -4.886199 |
| 1MFM | A | GLY | 127 | T | -4.384377  | 2.050441  | -11.604400 | -5.289165 |
| 1MFM | A | LYS | 128 | T | -4.121043  | 2.236315  | -11.570761 | -5.320746 |
| 1MFM | A | GLY | 129 | C | -4.065365  | 2.345555  | -11.652111 | -5.355433 |
| 1MFM | A | GLY | 130 | C | -4.065318  | 2.345986  | -11.653281 | -5.356289 |
| 1MFM | A | ASN | 131 | C | -4.131315  | 2.152682  | -11.729390 | -5.410794 |
| 1MFM | A | GLU | 132 | C | -4.583277  | 2.765995  | -11.716653 | -5.443209 |
| 1MFM | A | GLN | 133 | H | -5.486037  | 3.481723  | -12.498464 | -5.699587 |
| 1MFM | A | SER | 134 | H | -7.951315  | 5.580894  | -15.268236 | -5.850875 |
| 1MFM | A | THR | 135 | H | -8.890354  | 7.823548  | -15.331983 | -5.702066 |
| 1MFM | A | LYS | 136 | H | -8.872292  | 7.850501  | -15.257798 | -5.650675 |
| 1MFM | A | THR | 137 | H | -8.398539  | 6.312187  | -14.354372 | -5.123225 |
| 1MFM | A | GLY | 138 | T | -8.166721  | 5.906356  | -14.479311 | -5.038603 |
| 1MFM | A | ASN | 139 | T | -8.179717  | 5.843852  | -14.427077 | -5.006261 |
| 1MFM | A | ALA | 140 | T | -8.170767  | 5.918146  | -14.389041 | -4.986703 |
| 1MFM | A | GLY | 141 | C | -8.167855  | 5.998549  | -14.318145 | -4.960155 |
| 1MFM | A | SER | 142 | C | -8.708393  | 5.883608  | -14.702197 | -4.838978 |
| 1MFM | A | ARG | 143 | E | -9.709478  | 9.495823  | -14.279178 | -4.627182 |
| 1MFM | A | LEU | 144 | E | -9.070646  | 9.138046  | -12.971346 | -4.265988 |
| 1MFM | A | ALA | 145 | E | -8.420914  | 8.705358  | -11.927786 | -4.012934 |
| 1MFM | A | CYS | 146 | E | -8.329903  | 9.116679  | -12.213664 | -4.385332 |
| 1MFM | A | GLY | 147 | E | -7.115823  | 9.996104  | -10.405312 | -4.853412 |
| 1MFM | A | VAL | 148 | E | -5.915948  | 9.684107  | -7.933950  | -4.056299 |
| 1MFM | A | ILE | 149 | E | -4.582314  | 8.685056  | -5.995336  | -3.511617 |
| 1MFM | A | GLY | 150 | E | -2.640628  | 4.891899  | -4.498028  | -2.809235 |
| 1MFM | A | ILE | 151 | E | -2.640628  | 4.891899  | -4.498028  | -2.809235 |
| 1MFM | A | ALA | 152 | C | -2.640628  | 4.891899  | -4.498028  | -2.809235 |
| 1MFM | A | GLN | 153 | C | -2.640628  | 4.891899  | -4.498028  | -2.809235 |
| 1MH1 | A | PRO | 1   | C | -7.036179  | 6.391454  | -7.145792  | -1.505740 |
| 1MH1 | A | GLN | 2   | E | -7.036179  | 6.391454  | -7.145792  | -1.505740 |
| 1MH1 | A | ALA | 3   | E | -7.036179  | 6.391454  | -7.145792  | -1.505740 |
| 1MH1 | A | ILE | 4   | E | -7.036179  | 6.391454  | -7.145792  | -1.505740 |
| 1MH1 | A | LYS | 5   | E | -10.435401 | 9.260042  | -12.475151 | -3.158090 |
| 1MH1 | A | CYS | 6   | E | -9.764152  | 10.990182 | -9.740785  | -2.612288 |
| 1MH1 | A | VAL | 7   | E | -9.704147  | 11.027864 | -9.887878  | -2.625248 |
| 1MH1 | A | VAL | 8   | E | -8.994974  | 10.561353 | -11.477710 | -3.964773 |
| 1MH1 | A | VAL | 9   | E | -8.592748  | 8.512096  | -11.498382 | -3.473307 |
| 1MH1 | A | GLY | 10  | E | -8.014886  | 6.388083  | -11.539582 | -3.292574 |
| 1MH1 | A | ASP | 11  | T | -7.686428  | 6.119406  | -11.441127 | -3.374811 |
| 1MH1 | A | GLY | 12  | T | -7.626327  | 6.318023  | -11.484919 | -3.428007 |
| 1MH1 | A | ALA | 13  | T | -7.665550  | 6.044918  | -11.453453 | -3.356301 |
| 1MH1 | A | VAL | 14  | T | -7.727671  | 6.023587  | -11.451487 | -3.403048 |
| 1MH1 | A | GLY | 15  | C | -8.012474  | 6.614418  | -11.386077 | -3.542277 |
| 1MH1 | A | LYS | 16  | H | -8.933165  | 8.565060  | -12.077773 | -3.968578 |
| 1MH1 | A | THR | 17  | H | -10.275094 | 11.566176 | -13.666850 | -4.569793 |
| 1MH1 | A | CYS | 18  | H | -10.602284 | 12.255010 | -12.674775 | -3.918086 |
| 1MH1 | A | LEU | 19  | H | -11.011387 | 13.416272 | -12.456627 | -3.901203 |
| 1MH1 | A | LEU | 20  | H | -11.567321 | 15.573970 | -11.809065 | -3.672421 |
| 1MH1 | A | ILE | 21  | H | -11.458568 | 15.077569 | -11.987321 | -3.617806 |
| 1MH1 | A | SER | 22  | H | -10.666574 | 11.635104 | -12.812969 | -4.022542 |
| 1MH1 | A | TYR | 23  | H | -8.215661  | 9.902523  | -11.495350 | -4.782398 |
| 1MH1 | A | THR | 24  | H | -7.700522  | 9.158176  | -10.523173 | -3.988296 |
| 1MH1 | A | THR | 25  | H | -7.566922  | 9.342387  | -10.718780 | -4.101238 |
| 1MH1 | A | ASN | 26  | C | -7.272514  | 8.545971  | -10.390474 | -3.742273 |
| 1MH1 | A | ALA | 27  | C | -6.544631  | 7.657306  | -9.087681  | -3.277805 |
| 1MH1 | A | PHE | 28  | C | -6.033315  | 8.971301  | -8.949508  | -4.118911 |
| 1MH1 | A | PRO | 29  | C | -4.440938  | 6.467162  | -5.421639  | -2.638729 |
| 1MH1 | A | GLY | 30  | C | -3.867679  | 5.125926  | -5.630747  | -2.549791 |
| 1MH1 | A | GLU | 31  | C | -3.855814  | 5.150010  | -5.664616  | -2.551429 |
| 1MH1 | A | TYR | 32  | C | -3.850830  | 5.185771  | -5.661852  | -2.549667 |
| 1MH1 | A | ILE | 33  | C | -3.830204  | 5.431640  | -5.632437  | -2.583261 |

|      |   |     |     |   |            |           |            |           |
|------|---|-----|-----|---|------------|-----------|------------|-----------|
| 1MH1 | A | PRO | 34  | C | -4.070328  | 5.002357  | -5.858240  | -2.606234 |
| 1MH1 | A | THR | 35  | C | -5.289569  | 9.797102  | -6.553035  | -3.372044 |
| 1MH1 | A | VAL | 36  | C | -5.449042  | 10.852234 | -6.269427  | -3.592636 |
| 1MH1 | A | PHE | 37  | C | -5.608085  | 11.605319 | -6.090653  | -3.870407 |
| 1MH1 | A | ASP | 38  | C | -7.913418  | 10.514836 | -8.718316  | -3.052548 |
| 1MH1 | A | ASN | 39  | E | -8.698776  | 10.778774 | -10.216532 | -3.613892 |
| 1MH1 | A | TYR | 40  | E | -10.061422 | 12.012192 | -12.335328 | -4.042472 |
| 1MH1 | A | SER | 41  | E | -9.083269  | 7.500580  | -10.945806 | -2.615552 |
| 1MH1 | A | ALA | 42  | E | -8.819404  | 7.786419  | -10.779658 | -2.542676 |
| 1MH1 | A | ASN | 43  | E | -8.552166  | 8.116064  | -11.706452 | -3.382838 |
| 1MH1 | A | VAL | 44  | E | -7.973238  | 7.181494  | -10.739244 | -3.001317 |
| 1MH1 | A | MET | 45  | E | -7.323633  | 7.193520  | -10.137105 | -3.234496 |
| 1MH1 | A | VAL | 46  | E | -7.053064  | 7.831407  | -10.139046 | -3.562245 |
| 1MH1 | A | ASP | 47  | T | -6.996877  | 7.951835  | -10.321173 | -3.695400 |
| 1MH1 | A | GLY | 48  | T | -6.943964  | 8.110286  | -10.401845 | -3.818905 |
| 1MH1 | A | LYS | 49  | E | -7.013123  | 8.293567  | -10.430867 | -3.948318 |
| 1MH1 | A | PRO | 50  | E | -7.309236  | 9.008987  | -10.819516 | -4.334306 |
| 1MH1 | A | VAL | 51  | E | -7.865193  | 9.347607  | -11.822240 | -4.849636 |
| 1MH1 | A | ASN | 52  | E | -8.235090  | 9.618712  | -11.758288 | -5.042870 |
| 1MH1 | A | LEU | 53  | E | -10.709312 | 11.929074 | -11.374927 | -2.896492 |
| 1MH1 | A | GLY | 54  | E | -10.720134 | 11.920756 | -11.340394 | -2.897441 |
| 1MH1 | A | LEU | 55  | E | -11.177010 | 12.921364 | -11.153990 | -3.057654 |
| 1MH1 | A | TRP | 56  | E | -12.850826 | 12.959553 | -15.776584 | -4.267169 |
| 1MH1 | A | ASP | 57  | C | -11.666068 | 10.696184 | -14.546982 | -4.041392 |
| 1MH1 | A | THR | 58  | C | -8.570689  | 9.107336  | -12.649951 | -5.022614 |
| 1MH1 | A | ALA | 59  | C | -6.997308  | 5.970271  | -9.635694  | -3.166957 |
| 1MH1 | A | GLY | 60  | C | -6.640427  | 7.049786  | -9.180520  | -3.266454 |
| 1MH1 | A | GLN | 61  | C | -6.634084  | 7.063817  | -9.208029  | -3.270274 |
| 1MH1 | A | GLU | 62  | G | -6.516897  | 7.057835  | -9.221129  | -3.190069 |
| 1MH1 | A | ASP | 63  | G | -6.459124  | 7.273548  | -9.227399  | -3.234355 |
| 1MH1 | A | TYR | 64  | G | -6.737465  | 8.197157  | -9.119066  | -3.358815 |
| 1MH1 | A | ASP | 65  | T | -7.188425  | 8.016086  | -9.678655  | -3.326633 |
| 1MH1 | A | ARG | 66  | T | -7.201336  | 8.009287  | -9.626873  | -3.310652 |
| 1MH1 | A | LEU | 67  | T | -7.701529  | 9.304537  | -10.080912 | -3.955778 |
| 1MH1 | A | ARG | 68  | G | -10.220211 | 8.638709  | -10.954977 | -2.042769 |
| 1MH1 | A | PRO | 69  | G | -10.218009 | 8.646525  | -10.964092 | -2.044705 |
| 1MH1 | A | LEU | 70  | G | -10.237556 | 8.636183  | -10.894356 | -2.031239 |
| 1MH1 | A | SER | 71  | G | -11.984939 | 11.165274 | -14.448382 | -3.349200 |
| 1MH1 | A | TYR | 72  | T | -10.901706 | 10.762392 | -13.182214 | -3.723616 |
| 1MH1 | A | PRO | 73  | T | -8.431269  | 9.005094  | -11.595349 | -4.274414 |
| 1MH1 | A | GLN | 74  | T | -8.424194  | 9.019122  | -11.605820 | -4.262829 |
| 1MH1 | A | THR | 75  | T | -8.424191  | 9.021653  | -11.604744 | -4.263007 |
| 1MH1 | A | ASP | 76  | C | -8.424348  | 9.022830  | -11.602597 | -4.262691 |
| 1MH1 | A | VAL | 77  | E | -8.432095  | 9.001910  | -11.584136 | -4.268828 |
| 1MH1 | A | SER | 78  | E | -10.955295 | 10.746048 | -12.547428 | -3.278385 |
| 1MH1 | A | LEU | 79  | E | -12.167957 | 14.492895 | -12.744421 | -3.228568 |
| 1MH1 | A | ILE | 80  | E | -12.412509 | 15.259727 | -12.539656 | -3.184709 |
| 1MH1 | A | CYS | 81  | E | -12.745325 | 15.925689 | -13.029168 | -3.455103 |
| 1MH1 | A | PHE | 82  | E | -12.554682 | 16.393100 | -12.548774 | -3.591360 |
| 1MH1 | A | SER | 83  | E | -10.962963 | 13.716298 | -12.557529 | -4.311158 |
| 1MH1 | A | LEU | 84  | T | -10.198985 | 12.033064 | -10.677758 | -2.948337 |
| 1MH1 | A | VAL | 85  | T | -9.665637  | 10.330011 | -10.782586 | -2.748954 |
| 1MH1 | A | SER | 86  | T | -9.646273  | 10.366429 | -10.830828 | -2.756462 |
| 1MH1 | A | PRO | 87  | H | -9.643229  | 10.352491 | -10.856004 | -2.761233 |
| 1MH1 | A | ALA | 88  | H | -9.701481  | 10.001365 | -10.718325 | -2.604738 |
| 1MH1 | A | SER | 89  | H | -9.923084  | 9.369436  | -11.068501 | -2.685993 |
| 1MH1 | A | PHE | 90  | H | -11.395481 | 11.595054 | -13.433718 | -3.494733 |
| 1MH1 | A | GLU | 91  | H | -11.239347 | 9.454929  | -14.184467 | -3.459912 |
| 1MH1 | A | ASN | 92  | H | -11.327149 | 9.042735  | -14.278776 | -3.444634 |
| 1MH1 | A | VAL | 93  | H | -11.403662 | 8.803887  | -13.847131 | -3.157680 |
| 1MH1 | A | ARG | 94  | H | -11.418763 | 8.682263  | -13.823110 | -3.139981 |
| 1MH1 | A | ALA | 95  | H | -11.423064 | 8.646458  | -13.811758 | -3.136272 |
| 1MH1 | A | LYS | 96  | H | -13.526582 | 11.852780 | -16.706547 | -4.156994 |
| 1MH1 | A | TRP | 97  | H | -14.360875 | 15.700486 | -17.058799 | -5.238460 |
| 1MH1 | A | TYR | 98  | H | -13.837449 | 14.734310 | -16.645711 | -4.946179 |
| 1MH1 | A | PRO | 99  | H | -12.259908 | 10.375393 | -14.240393 | -3.125540 |
| 1MH1 | A | GLU | 100 | H | -11.844024 | 10.743291 | -13.852240 | -3.126148 |
| 1MH1 | A | VAL | 101 | H | -10.889195 | 10.473040 | -12.438435 | -2.995481 |
| 1MH1 | A | ARG | 102 | H | -10.269864 | 8.378282  | -12.962725 | -2.992256 |
| 1MH1 | A | HIS | 103 | H | -6.536411  | 5.906104  | -10.894315 | -4.398335 |
| 1MH1 | A | HIS | 104 | H | -6.381667  | 6.095045  | -10.502361 | -4.088930 |
| 1MH1 | A | CYS | 105 | H | -6.192282  | 5.931399  | -10.006646 | -3.637781 |
| 1MH1 | A | PRO | 106 | T | -6.053269  | 6.549128  | -9.250169  | -3.299530 |
| 1MH1 | A | ASN | 107 | T | -6.044935  | 6.635719  | -9.218726  | -3.287544 |
| 1MH1 | A | THR | 108 | T | -6.383491  | 7.205425  | -7.929568  | -2.429090 |
| 1MH1 | A | PRO | 109 | C | -6.538796  | 7.348646  | -7.551821  | -2.242319 |
| 1MH1 | A | ILE | 110 | E | -6.938606  | 9.139280  | -6.454191  | -2.051843 |
| 1MH1 | A | ILE | 111 | E | -8.534912  | 12.665071 | -7.298461  | -2.480141 |
| 1MH1 | A | LEU | 112 | E | -10.562385 | 16.070354 | -9.773864  | -3.094815 |
| 1MH1 | A | VAL | 113 | E | -10.791067 | 15.038949 | -10.339032 | -2.967325 |
| 1MH1 | A | GLY | 114 | E | -10.808810 | 14.863104 | -10.494783 | -3.037787 |

|      |   |     |     |   |            |           |            |           |
|------|---|-----|-----|---|------------|-----------|------------|-----------|
| 1MH1 | A | THR | 115 | E | -11.136391 | 13.957594 | -12.134211 | -3.640046 |
| 1MH1 | A | LYS | 116 | C | -11.654925 | 13.694646 | -14.554859 | -4.784642 |
| 1MH1 | A | LEU | 117 | H | -11.723331 | 13.594666 | -14.907631 | -4.988054 |
| 1MH1 | A | ASP | 118 | H | -11.644954 | 10.656056 | -16.557266 | -5.178882 |
| 1MH1 | A | LEU | 119 | H | -11.620319 | 10.333622 | -16.625473 | -5.095948 |
| 1MH1 | A | ARG | 120 | H | -10.494315 | 6.467261  | -15.157708 | -3.993637 |
| 1MH1 | A | ASP | 121 | H | -7.694228  | 5.469370  | -11.203810 | -3.601466 |
| 1MH1 | A | ASP | 122 | C | -7.515395  | 5.960859  | -11.090870 | -3.531747 |
| 1MH1 | A | LYS | 123 | H | -7.483361  | 6.036279  | -11.254158 | -3.604990 |
| 1MH1 | A | ASP | 124 | H | -7.480849  | 6.040005  | -11.265562 | -3.604202 |
| 1MH1 | A | THR | 125 | H | -7.483755  | 6.042453  | -11.247350 | -3.603000 |
| 1MH1 | A | ILE | 126 | H | -8.186881  | 7.367202  | -11.427147 | -3.614421 |
| 1MH1 | A | GLU | 127 | H | -9.169039  | 7.407246  | -14.214859 | -4.805066 |
| 1MH1 | A | LYS | 128 | H | -10.593896 | 7.210313  | -14.416258 | -3.567974 |
| 1MH1 | A | LEU | 129 | H | -11.368727 | 7.355126  | -16.469703 | -3.997839 |
| 1MH1 | A | LYS | 130 | H | -9.930978  | 4.058921  | -14.880512 | -3.513213 |
| 1MH1 | A | GLU | 131 | H | -9.237910  | 4.807441  | -13.638343 | -3.294044 |
| 1MH1 | A | LYS | 132 | C | -8.313800  | 7.535629  | -10.790756 | -3.053707 |
| 1MH1 | A | LYS | 133 | C | -7.802681  | 10.138468 | -9.909098  | -3.637729 |
| 1MH1 | A | LEU | 134 | C | -7.701374  | 10.391807 | -9.545881  | -3.434208 |
| 1MH1 | A | THR | 135 | C | -7.706475  | 10.570909 | -9.430743  | -3.425555 |
| 1MH1 | A | PRO | 136 | C | -7.731471  | 10.879513 | -9.241000  | -3.430426 |
| 1MH1 | A | ILE | 137 | C | -7.910002  | 11.892889 | -8.997873  | -3.590866 |
| 1MH1 | A | THR | 138 | C | -7.513690  | 9.312571  | -10.709885 | -4.394309 |
| 1MH1 | A | TYR | 139 | H | -7.575199  | 9.008923  | -11.116199 | -4.635363 |
| 1MH1 | A | PRO | 140 | H | -7.538962  | 8.847120  | -11.137005 | -4.535598 |
| 1MH1 | A | GLN | 141 | H | -7.542961  | 8.825317  | -11.148028 | -4.549174 |
| 1MH1 | A | GLY | 142 | H | -7.551578  | 8.809210  | -11.162559 | -4.573038 |
| 1MH1 | A | LEU | 143 | H | -8.504723  | 8.914806  | -11.512254 | -3.625106 |
| 1MH1 | A | ALA | 144 | H | -8.523722  | 8.827417  | -11.567892 | -3.633177 |
| 1MH1 | A | MET | 145 | H | -8.784268  | 9.754918  | -11.800581 | -4.024858 |
| 1MH1 | A | ALA | 146 | H | -8.296236  | 8.559251  | -10.977716 | -3.408008 |
| 1MH1 | A | LYS | 147 | H | -7.582812  | 8.697842  | -9.649795  | -3.236890 |
| 1MH1 | A | GLU | 148 | H | -7.174932  | 9.111915  | -9.766658  | -3.744641 |
| 1MH1 | A | ILE | 149 | H | -6.578016  | 9.631736  | -7.549391  | -2.965648 |
| 1MH1 | A | GLY | 150 | C | -6.553773  | 9.731338  | -7.559472  | -2.966646 |
| 1MH1 | A | ALA | 151 | C | -6.569536  | 9.816406  | -7.474804  | -2.967656 |
| 1MH1 | A | VAL | 152 | C | -6.650896  | 9.972141  | -7.232690  | -2.938775 |
| 1MH1 | A | LYS | 153 | E | -6.803494  | 10.095748 | -6.402529  | -2.552913 |
| 1MH1 | A | TYR | 154 | E | -8.396509  | 12.434227 | -7.875615  | -3.003356 |
| 1MH1 | A | LEU | 155 | E | -9.803014  | 15.550132 | -8.253908  | -3.097160 |
| 1MH1 | A | GLU | 156 | E | -11.027198 | 16.469340 | -10.749253 | -4.045511 |
| 1MH1 | A | CYS | 157 | C | -10.287828 | 9.754813  | -12.441065 | -3.527515 |
| 1MH1 | A | SER | 158 | T | -9.812943  | 9.522382  | -13.577241 | -4.353292 |
| 1MH1 | A | ALA | 159 | T | -9.433681  | 9.085864  | -12.622512 | -3.727758 |
| 1MH1 | A | LEU | 160 | T | -8.486160  | 6.883479  | -11.634944 | -3.318984 |
| 1MH1 | A | THR | 161 | T | -8.459070  | 6.951302  | -11.682380 | -3.323337 |
| 1MH1 | A | GLN | 162 | T | -8.484641  | 6.832476  | -11.659357 | -3.316873 |
| 1MH1 | A | ARG | 163 | T | -7.952849  | 8.384403  | -11.297272 | -3.929833 |
| 1MH1 | A | GLY | 164 | T | -7.735553  | 9.059764  | -10.318406 | -3.579298 |
| 1MH1 | A | LEU | 165 | H | -7.885002  | 9.867526  | -10.007370 | -3.682713 |
| 1MH1 | A | LYS | 166 | H | -7.893911  | 9.900433  | -9.962472  | -3.685572 |
| 1MH1 | A | THR | 167 | H | -7.894332  | 9.901858  | -9.958404  | -3.685634 |
| 1MH1 | A | VAL | 168 | H | -8.378988  | 10.471351 | -8.406692  | -2.808441 |
| 1MH1 | A | PHE | 169 | H | -11.063940 | 14.808121 | -10.220313 | -2.884493 |
| 1MH1 | A | ASP | 170 | H | -11.499219 | 13.446339 | -11.105471 | -2.941988 |
| 1MH1 | A | GLU | 171 | H | -12.976827 | 16.432121 | -14.475378 | -4.593283 |
| 1MH1 | A | ALA | 172 | H | -12.235236 | 16.405645 | -13.784030 | -4.959416 |
| 1MH1 | A | ILE | 173 | H | -10.508097 | 14.347770 | -11.819422 | -4.767580 |
| 1MH1 | A | ARG | 174 | H | -8.915437  | 10.017910 | -11.158819 | -4.101811 |
| 1MH1 | A | ALA | 175 | H | -4.864859  | 8.419987  | -5.017470  | -2.879671 |
| 1MH1 | A | VAL | 176 | H | -3.438069  | 6.380483  | -3.761953  | -2.325635 |
| 1MH1 | A | LEU | 177 | C | -2.183626  | 4.187774  | -2.656435  | -1.710821 |
| 1MH1 | A | CYS | 178 | C | 0.549918   | 1.253470  | -1.611827  | -2.240885 |
| 1MH1 | A | PRO | 179 | C | 0.549918   | 1.253470  | -1.611827  | -2.240885 |
| 1MH1 | A | PRO | 180 | C | 0.549918   | 1.253470  | -1.611827  | -2.240885 |
| 1MH1 | A | PRO | 181 | C | 0.549918   | 1.253470  | -1.611827  | -2.240885 |
| 1MH9 | A | ARG | 34  | C | -8.260062  | 8.905619  | -9.910529  | -3.073578 |
| 1MH9 | A | ALA | 35  | C | -8.260062  | 8.905619  | -9.910529  | -3.073578 |
| 1MH9 | A | LEU | 36  | E | -8.260062  | 8.905619  | -9.910529  | -3.073578 |
| 1MH9 | A | ARG | 37  | E | -8.260062  | 8.905619  | -9.910529  | -3.073578 |
| 1MH9 | A | VAL | 38  | E | -10.651107 | 12.222751 | -12.205771 | -3.771685 |
| 1MH9 | A | LEU | 39  | E | -12.485083 | 16.550789 | -14.292822 | -4.835650 |
| 1MH9 | A | VAL | 40  | E | -12.250659 | 14.416143 | -15.561560 | -5.197319 |
| 1MH9 | A | ASP | 41  | C | -11.904190 | 13.051583 | -16.158288 | -5.315870 |
| 1MH9 | A | MET | 42  | T | -11.748059 | 13.521668 | -15.857233 | -5.279498 |
| 1MH9 | A | ASP | 43  | T | -11.388718 | 13.450147 | -14.692636 | -4.832672 |
| 1MH9 | A | GLY | 44  | T | -10.879615 | 13.833619 | -13.272104 | -4.454207 |
| 1MH9 | A | VAL | 45  | T | -10.898078 | 14.010772 | -13.075864 | -4.397733 |
| 1MH9 | A | LEU | 46  | T | -10.946707 | 14.256248 | -12.743579 | -4.305454 |
| 1MH9 | A | ALA | 47  | B | -10.928765 | 14.220391 | -12.826743 | -4.340896 |

|      |   |     |     |   |            |           |            |           |
|------|---|-----|-----|---|------------|-----------|------------|-----------|
| 1MH9 | A | ASP | 48  | T | -10.344034 | 12.995397 | -13.789242 | -5.291529 |
| 1MH9 | A | PHE | 49  | H | -10.491863 | 12.722164 | -14.269217 | -5.633580 |
| 1MH9 | A | GLU | 50  | H | -10.480309 | 12.713596 | -14.324608 | -5.643233 |
| 1MH9 | A | GLY | 51  | H | -10.334640 | 12.769008 | -14.186817 | -5.455194 |
| 1MH9 | A | GLY | 52  | H | -10.349269 | 12.731248 | -14.169545 | -5.458245 |
| 1MH9 | A | PHE | 53  | H | -11.118246 | 13.392150 | -14.002447 | -4.908762 |
| 1MH9 | A | LEU | 54  | H | -11.156482 | 13.188059 | -13.939549 | -4.856504 |
| 1MH9 | A | ARG | 55  | H | -11.190034 | 13.096606 | -13.830291 | -4.780891 |
| 1MH9 | A | LYS | 56  | H | -12.402280 | 14.975645 | -15.126382 | -4.853073 |
| 1MH9 | A | PHE | 57  | H | -11.365505 | 17.271451 | -11.915503 | -4.697339 |
| 1MH9 | A | ARG | 58  | H | -9.092571  | 11.389901 | -11.045892 | -4.121465 |
| 1MH9 | A | ALA | 59  | H | -7.921216  | 8.777314  | -11.318335 | -4.264665 |
| 1MH9 | A | ARG | 60  | H | -7.837418  | 8.987333  | -11.503649 | -4.382213 |
| 1MH9 | A | PHE | 61  | T | -7.520975  | 9.732758  | -11.211899 | -4.565782 |
| 1MH9 | A | PRO | 62  | T | -7.341544  | 9.978538  | -11.147973 | -4.626882 |
| 1MH9 | A | ASP | 63  | T | -7.358721  | 10.010548 | -11.161759 | -4.667296 |
| 1MH9 | A | GLN | 64  | T | -7.593212  | 10.885021 | -11.065625 | -4.859238 |
| 1MH9 | A | PRO | 65  | C | -7.621226  | 11.149732 | -10.837777 | -4.809325 |
| 1MH9 | A | PHE | 66  | C | -7.761436  | 12.346950 | -10.313401 | -4.720313 |
| 1MH9 | A | ILE | 67  | C | -6.520372  | 9.570291  | -9.126548  | -4.367099 |
| 1MH9 | A | ALA | 68  | C | -6.522169  | 9.542370  | -9.128018  | -4.364495 |
| 1MH9 | A | LEU | 69  | G | -6.523110  | 9.532463  | -9.124339  | -4.363373 |
| 1MH9 | A | GLU | 70  | G | -6.527104  | 9.488713  | -9.123635  | -4.363650 |
| 1MH9 | A | ASP | 71  | G | -6.553822  | 9.285223  | -9.115948  | -4.353344 |
| 1MH9 | A | ARG | 72  | C | -10.039981 | 8.960500  | -14.930757 | -5.185517 |
| 1MH9 | A | ARG | 73  | C | -11.743012 | 9.629383  | -17.603715 | -5.379303 |
| 1MH9 | A | GLY | 74  | C | -10.159339 | 12.599744 | -13.474844 | -5.342494 |
| 1MH9 | A | PHE | 75  | C | -9.915938  | 13.115354 | -13.197253 | -5.306608 |
| 1MH9 | A | TRP | 76  | C | -9.901822  | 13.079011 | -13.281039 | -5.316066 |
| 1MH9 | A | VAL | 77  | H | -9.901672  | 13.080160 | -13.281943 | -5.316236 |
| 1MH9 | A | SER | 78  | H | -9.915556  | 13.116069 | -13.214616 | -5.317868 |
| 1MH9 | A | GLU | 79  | H | -10.473860 | 13.564938 | -13.342221 | -5.283334 |
| 1MH9 | A | GLN | 80  | H | -11.805336 | 11.852979 | -16.854539 | -5.564748 |
| 1MH9 | A | TYR | 81  | H | -11.339605 | 13.651652 | -13.927109 | -4.730413 |
| 1MH9 | A | GLY | 82  | H | -7.104507  | 6.829321  | -10.382244 | -3.788447 |
| 1MH9 | A | ARG | 83  | H | -6.787844  | 6.732448  | -10.553412 | -3.800536 |
| 1MH9 | A | LEU | 84  | H | -6.703515  | 7.075903  | -10.546373 | -3.843390 |
| 1MH9 | A | ARG | 85  | T | -6.686250  | 7.113178  | -10.600874 | -3.858529 |
| 1MH9 | A | PRO | 86  | T | -6.485240  | 7.294152  | -10.660361 | -4.015332 |
| 1MH9 | A | GLY | 87  | T | -6.680082  | 7.783656  | -10.885196 | -4.225417 |
| 1MH9 | A | LEU | 88  | H | -6.928911  | 8.423872  | -10.938405 | -4.441346 |
| 1MH9 | A | SER | 89  | H | -7.051880  | 8.226671  | -11.060177 | -4.518590 |
| 1MH9 | A | GLU | 90  | H | -7.083202  | 8.221833  | -10.988932 | -4.527338 |
| 1MH9 | A | LYS | 91  | H | -8.006101  | 10.016964 | -11.670142 | -4.992102 |
| 1MH9 | A | ALA | 92  | H | -9.538205  | 11.235713 | -13.181776 | -4.673972 |
| 1MH9 | A | ILE | 93  | H | -9.715745  | 10.888089 | -13.363027 | -4.664687 |
| 1MH9 | A | SER | 94  | H | -10.513039 | 11.945995 | -14.213867 | -4.819525 |
| 1MH9 | A | ILE | 95  | H | -11.029586 | 15.015715 | -13.612603 | -4.955312 |
| 1MH9 | A | TRP | 96  | H | -11.225192 | 15.856854 | -13.846981 | -5.249036 |
| 1MH9 | A | GLU | 97  | H | -11.370817 | 15.572319 | -14.540879 | -5.542202 |
| 1MH9 | A | SER | 98  | T | -11.680882 | 15.234485 | -15.325211 | -5.764582 |
| 1MH9 | A | LYS | 99  | T | -11.684777 | 15.321579 | -15.286292 | -5.775070 |
| 1MH9 | A | ASN | 100 | T | -11.854239 | 14.588688 | -15.737614 | -5.848222 |
| 1MH9 | A | PHE | 101 | T | -12.410550 | 14.434972 | -16.341095 | -5.815193 |
| 1MH9 | A | PHE | 102 | T | -12.995839 | 17.839527 | -15.416962 | -5.606031 |
| 1MH9 | A | PHE | 103 | T | -11.148914 | 14.107523 | -13.107666 | -4.742806 |
| 1MH9 | A | GLU | 104 | T | -10.529480 | 13.960777 | -12.466322 | -4.504840 |
| 1MH9 | A | LEU | 105 | T | -9.105718  | 11.947588 | -10.292105 | -3.622926 |
| 1MH9 | A | GLU | 106 | C | -6.193980  | 8.790123  | -8.172198  | -3.785215 |
| 1MH9 | A | PRO | 107 | B | -5.842294  | 9.209727  | -7.894712  | -3.687600 |
| 1MH9 | A | LEU | 108 | T | -5.800677  | 9.290383  | -7.949117  | -3.686565 |
| 1MH9 | A | PRO | 109 | T | -5.700744  | 9.051887  | -8.177382  | -3.695353 |
| 1MH9 | A | GLY | 110 | T | -5.669994  | 9.039004  | -8.252940  | -3.703955 |
| 1MH9 | A | ALA | 111 | H | -5.981071  | 9.234935  | -8.324575  | -3.646104 |
| 1MH9 | A | VAL | 112 | H | -6.473580  | 8.602936  | -9.337307  | -3.749350 |
| 1MH9 | A | GLU | 113 | H | -6.613499  | 8.123080  | -9.513835  | -3.770780 |
| 1MH9 | A | ALA | 114 | H | -7.378459  | 9.083277  | -9.758186  | -3.843238 |
| 1MH9 | A | VAL | 115 | H | -9.184292  | 11.872063 | -11.177093 | -3.769152 |
| 1MH9 | A | LYS | 116 | H | -9.637101  | 11.470069 | -12.486279 | -4.163135 |
| 1MH9 | A | GLU | 117 | H | -10.126415 | 10.873959 | -14.292717 | -4.716066 |
| 1MH9 | A | MET | 118 | H | -9.904358  | 10.454419 | -14.002057 | -4.697496 |
| 1MH9 | A | ALA | 119 | H | -8.326769  | 6.721775  | -13.035019 | -4.419923 |
| 1MH9 | A | SER | 120 | H | -8.242854  | 6.801711  | -13.226149 | -4.488896 |
| 1MH9 | A | LEU | 121 | T | -8.204964  | 6.926867  | -13.304122 | -4.536674 |
| 1MH9 | A | GLN | 122 | T | -8.145593  | 7.192637  | -13.302210 | -4.571985 |
| 1MH9 | A | ASN | 123 | T | -8.165816  | 7.106783  | -13.292950 | -4.573028 |
| 1MH9 | A | THR | 124 | E | -8.896827  | 8.751543  | -14.082287 | -4.994363 |
| 1MH9 | A | ASP | 125 | E | -9.206462  | 9.641768  | -13.815517 | -5.029824 |
| 1MH9 | A | VAL | 126 | E | -9.475237  | 10.093846 | -13.376566 | -4.911842 |
| 1MH9 | A | PHE | 127 | E | -11.144167 | 15.588786 | -13.521975 | -5.008236 |
| 1MH9 | A | ILE | 128 | E | -10.922617 | 14.773249 | -13.343795 | -4.872162 |

|      |   |     |     |   |            |           |            |           |
|------|---|-----|-----|---|------------|-----------|------------|-----------|
| 1MH9 | A | CYS | 129 | E | -10.674690 | 13.102080 | -13.972745 | -4.958269 |
| 1MH9 | A | THR | 130 | E | -9.709130  | 10.776115 | -13.302475 | -4.701672 |
| 1MH9 | A | SER | 131 | C | -9.201164  | 10.732164 | -12.923209 | -4.729490 |
| 1MH9 | A | PRO | 132 | C | -7.786276  | 10.067169 | -10.594618 | -4.369591 |
| 1MH9 | A | ILE | 133 | T | -6.143310  | 8.761355  | -9.107728  | -4.408242 |
| 1MH9 | A | LYS | 134 | T | -6.085408  | 8.822295  | -9.258088  | -4.440164 |
| 1MH9 | A | MET | 135 | T | -6.081133  | 8.844410  | -9.273807  | -4.445515 |
| 1MH9 | A | PHE | 136 | T | -6.078378  | 8.860935  | -9.279937  | -4.446949 |
| 1MH9 | A | LYS | 137 | C | -6.107727  | 8.813386  | -9.227847  | -4.454368 |
| 1MH9 | A | TYR | 138 | H | -7.378852  | 9.859598  | -10.877838 | -4.782767 |
| 1MH9 | A | CYS | 139 | H | -8.421866  | 11.969932 | -11.588686 | -4.934035 |
| 1MH9 | A | PRO | 140 | H | -8.793634  | 12.315626 | -11.420741 | -4.809808 |
| 1MH9 | A | TYR | 141 | H | -9.602406  | 13.951444 | -11.490484 | -4.975801 |
| 1MH9 | A | GLU | 142 | H | -11.672684 | 15.659595 | -14.061989 | -5.477860 |
| 1MH9 | A | LYS | 143 | H | -13.167699 | 14.637325 | -17.160994 | -5.668458 |
| 1MH9 | A | TYR | 144 | H | -13.077285 | 18.364354 | -14.089411 | -4.958029 |
| 1MH9 | A | ALA | 145 | H | -11.232369 | 17.946023 | -11.163939 | -4.736721 |
| 1MH9 | A | TRP | 146 | H | -11.164557 | 18.097471 | -11.266370 | -4.765662 |
| 1MH9 | A | VAL | 147 | H | -10.991793 | 18.686547 | -11.171581 | -4.834009 |
| 1MH9 | A | GLU | 148 | H | -10.094662 | 18.112602 | -10.722374 | -5.253589 |
| 1MH9 | A | LYS | 149 | H | -9.732720  | 17.317348 | -10.776884 | -5.135228 |
| 1MH9 | A | TYR | 150 | H | -9.467121  | 16.372590 | -10.914828 | -5.058017 |
| 1MH9 | A | PHE | 151 | H | -7.740875  | 14.786179 | -8.258229  | -4.622345 |
| 1MH9 | A | GLY | 152 | C | -7.122571  | 12.807983 | -8.730241  | -4.505441 |
| 1MH9 | A | PRO | 153 | G | -6.755204  | 12.138435 | -8.740619  | -4.416051 |
| 1MH9 | A | ASP | 154 | G | -6.750883  | 12.122065 | -8.767650  | -4.417472 |
| 1MH9 | A | PHE | 155 | G | -6.752752  | 12.113803 | -8.760374  | -4.415725 |
| 1MH9 | A | LEU | 156 | G | -6.863140  | 11.560010 | -8.927421  | -4.375711 |
| 1MH9 | A | GLU | 157 | G | -7.170740  | 11.481779 | -8.923944  | -4.331130 |
| 1MH9 | A | GLN | 158 | G | -8.773888  | 12.834528 | -11.347615 | -4.528502 |
| 1MH9 | A | ILE | 159 | E | -8.576526  | 13.457604 | -10.346663 | -4.286744 |
| 1MH9 | A | VAL | 160 | E | -8.448874  | 12.843039 | -10.678502 | -4.309427 |
| 1MH9 | A | LEU | 161 | E | -8.542534  | 12.938850 | -10.577611 | -4.310646 |
| 1MH9 | A | THR | 162 | T | -8.694552  | 12.732328 | -10.560502 | -4.265068 |
| 1MH9 | A | ARG | 163 | T | -8.726336  | 12.632407 | -10.511609 | -4.249041 |
| 1MH9 | A | ASP | 164 | T | -9.335003  | 10.843983 | -12.215332 | -4.485759 |
| 1MH9 | A | LYS | 165 | T | -10.517929 | 11.698669 | -15.011322 | -5.295340 |
| 1MH9 | A | THR | 166 | T | -8.317314  | 10.207276 | -10.749501 | -4.185769 |
| 1MH9 | A | VAL | 167 | T | -7.933687  | 9.739283  | -10.965876 | -4.167136 |
| 1MH9 | A | VAL | 168 | T | -7.930647  | 9.754220  | -10.975045 | -4.167968 |
| 1MH9 | A | SER | 169 | C | -7.930778  | 9.759729  | -10.968692 | -4.166027 |
| 1MH9 | A | ALA | 170 | C | -7.932644  | 9.780563  | -10.940806 | -4.159119 |
| 1MH9 | A | ASP | 171 | C | -8.355194  | 9.384152  | -11.241440 | -4.158103 |
| 1MH9 | A | LEU | 172 | E | -10.463362 | 14.771965 | -12.369408 | -4.500425 |
| 1MH9 | A | LEU | 173 | E | -10.782981 | 16.431480 | -11.714106 | -4.514111 |
| 1MH9 | A | ILE | 174 | E | -11.006974 | 17.474512 | -11.016301 | -4.433096 |
| 1MH9 | A | ASP | 175 | E | -11.838296 | 15.927820 | -13.872058 | -4.991955 |
| 1MH9 | A | ASP | 176 | C | -10.127484 | 13.371264 | -12.352245 | -4.865759 |
| 1MH9 | A | ARG | 177 | T | -6.323266  | 11.379503 | -7.953208  | -4.410075 |
| 1MH9 | A | PRO | 178 | T | -4.050338  | 9.299391  | -6.124242  | -4.458752 |
| 1MH9 | A | ASP | 179 | T | -3.221657  | 7.501595  | -6.188846  | -4.336053 |
| 1MH9 | A | ILE | 180 | T | -3.168147  | 7.660515  | -6.243592  | -4.352728 |
| 1MH9 | A | THR | 181 | C | -3.022711  | 7.072539  | -6.573142  | -4.309141 |
| 1MH9 | A | GLY | 182 | C | -2.520686  | 5.273698  | -6.611553  | -4.082793 |
| 1MH9 | A | ALA | 183 | C | -2.438332  | 5.122433  | -6.490212  | -3.937195 |
| 1MH9 | A | GLU | 184 | T | -2.561681  | 4.658800  | -6.562128  | -3.822859 |
| 1MH9 | A | PRO | 185 | T | -2.580433  | 4.507105  | -6.551213  | -3.798153 |
| 1MH9 | A | THR | 186 | T | -2.645873  | 4.450942  | -6.400222  | -3.751624 |
| 1MH9 | A | PRO | 187 | T | -3.367491  | 5.762160  | -5.912852  | -3.432347 |
| 1MH9 | A | SER | 188 | C | -4.836014  | 5.757445  | -8.192940  | -3.794956 |
| 1MH9 | A | TRP | 189 | C | -7.210329  | 10.419352 | -9.397025  | -4.233509 |
| 1MH9 | A | GLU | 190 | E | -10.987025 | 11.094912 | -15.570512 | -5.356078 |
| 1MH9 | A | HIS | 191 | E | -13.032653 | 13.549409 | -16.723107 | -5.176019 |
| 1MH9 | A | VAL | 192 | E | -12.701088 | 16.845506 | -13.605141 | -4.544197 |
| 1MH9 | A | LEU | 193 | E | -11.954408 | 15.505129 | -13.982581 | -4.900885 |
| 1MH9 | A | PHE | 194 | E | -11.922177 | 15.461945 | -14.126955 | -4.934769 |
| 1MH9 | A | THR | 195 | C | -11.826691 | 14.724083 | -14.783947 | -5.068630 |
| 1MH9 | A | ALA | 196 | T | -11.760484 | 14.293514 | -15.218929 | -5.181575 |
| 1MH9 | A | CYS | 197 | T | -11.815905 | 13.378674 | -16.076304 | -5.452883 |
| 1MH9 | A | HIS | 198 | T | -11.774905 | 10.476258 | -18.247834 | -5.979120 |
| 1MH9 | A | ASN | 199 | T | -9.245297  | 7.340557  | -15.042256 | -5.438103 |
| 1MH9 | A | GLN | 200 | T | -6.980823  | 9.462439  | -10.351118 | -4.932511 |
| 1MH9 | A | HIS | 201 | T | -5.580612  | 9.527690  | -8.334116  | -4.662715 |
| 1MH9 | A | LEU | 202 | T | -4.841718  | 8.680208  | -7.526289  | -4.191543 |
| 1MH9 | A | GLN | 203 | C | -3.800759  | 6.903654  | -6.643759  | -3.885222 |
| 1MH9 | A | LEU | 204 | C | -3.797032  | 6.902191  | -6.665216  | -3.884838 |
| 1MH9 | A | GLN | 205 | T | -3.799711  | 6.890121  | -6.649082  | -3.880061 |
| 1MH9 | A | PRO | 206 | T | -3.826979  | 6.764587  | -6.578625  | -3.843957 |
| 1MH9 | A | PRO | 207 | T | -3.908728  | 6.529321  | -6.484190  | -3.819209 |
| 1MH9 | A | ARG | 208 | T | -6.790922  | 6.652376  | -10.153111 | -3.839931 |
| 1MH9 | A | ARG | 209 | E | -9.805386  | 5.726852  | -15.124184 | -4.341475 |

|      |   |     |     |   |            |           |            |           |
|------|---|-----|-----|---|------------|-----------|------------|-----------|
| 1MH9 | A | ARG | 210 | E | -14.152366 | 10.802428 | -20.652451 | -5.734860 |
| 1MH9 | A | LEU | 211 | E | -10.744680 | 14.614804 | -11.974703 | -4.590696 |
| 1MH9 | A | HIS | 212 | C | -9.016713  | 10.987129 | -11.798490 | -4.555927 |
| 1MH9 | A | SER | 213 | T | -8.614887  | 10.565193 | -11.918540 | -4.531514 |
| 1MH9 | A | TRP | 214 | T | -8.602108  | 10.674567 | -11.929584 | -4.546831 |
| 1MH9 | A | ALA | 215 | T | -8.489213  | 10.701761 | -12.131632 | -4.649543 |
| 1MH9 | A | ASP | 216 | T | -8.474894  | 10.640754 | -12.212254 | -4.670595 |
| 1MH9 | A | ASP | 217 | T | -8.707859  | 10.779095 | -12.459157 | -4.751559 |
| 1MH9 | A | TRP | 218 | H | -9.212512  | 11.696550 | -13.026187 | -5.084255 |
| 1MH9 | A | LYS | 219 | H | -9.211544  | 11.472987 | -13.112263 | -5.058653 |
| 1MH9 | A | ALA | 220 | H | -9.735008  | 12.388876 | -13.145391 | -4.947896 |
| 1MH9 | A | ILE | 221 | H | -10.015202 | 13.121639 | -12.767393 | -4.881452 |
| 1MH9 | A | LEU | 222 | H | -10.244886 | 11.433825 | -14.981035 | -5.591699 |
| 1MH9 | A | ASP | 223 | H | -8.295799  | 6.319196  | -14.039813 | -5.129667 |
| 1MH9 | A | SER | 224 | H | -7.799924  | 5.936803  | -13.358946 | -4.620231 |
| 1MH9 | A | LYS | 225 | C | -7.799924  | 5.936803  | -13.358946 | -4.620231 |
| 1MH9 | A | ARG | 226 | C | -7.799924  | 5.936803  | -13.358946 | -4.620231 |
| 1MH9 | A | PRO | 227 | C | -7.799924  | 5.936803  | -13.358946 | -4.620231 |
| 1MJ4 | A | SER | 3   | C | -3.085671  | 6.684085  | -4.599089  | -3.187909 |
| 1MJ4 | A | THR | 4   | C | -3.085671  | 6.684085  | -4.599089  | -3.187909 |
| 1MJ4 | A | HIS | 5   | C | -3.085671  | 6.684085  | -4.599089  | -3.187909 |
| 1MJ4 | A | ILE | 6   | C | -3.085671  | 6.684085  | -4.599089  | -3.187909 |
| 1MJ4 | A | TYR | 7   | C | -6.124584  | 11.347568 | -8.781435  | -4.781382 |
| 1MJ4 | A | THR | 8   | T | -6.173456  | 9.794451  | -9.997816  | -5.010809 |
| 1MJ4 | A | LYS | 9   | T | -6.190789  | 9.743724  | -9.964643  | -4.999206 |
| 1MJ4 | A | GLU | 10  | T | -6.210458  | 9.677875  | -9.893452  | -4.966197 |
| 1MJ4 | A | GLU | 11  | T | -6.215815  | 9.659647  | -9.854414  | -4.949375 |
| 1MJ4 | A | VAL | 12  | T | -6.367580  | 8.953000  | -9.505573  | -4.627288 |
| 1MJ4 | A | SER | 13  | T | -9.151466  | 10.428392 | -12.916188 | -4.896292 |
| 1MJ4 | A | SER | 14  | T | -10.749395 | 11.418065 | -15.910338 | -5.317559 |
| 1MJ4 | A | HIS | 15  | E | -8.223833  | 9.886967  | -11.634824 | -4.837910 |
| 1MJ4 | A | THR | 16  | E | -5.657835  | 8.397902  | -8.775666  | -4.567123 |
| 1MJ4 | A | SER | 17  | G | -4.712064  | 7.835251  | -8.690037  | -4.856257 |
| 1MJ4 | A | PRO | 18  | G | -4.661863  | 8.074100  | -8.692356  | -4.871154 |
| 1MJ4 | A | GLU | 19  | G | -4.661842  | 8.074447  | -8.692455  | -4.871190 |
| 1MJ4 | A | THR | 20  | E | -4.663284  | 8.070049  | -8.685354  | -4.871271 |
| 1MJ4 | A | GLY | 21  | E | -4.783973  | 7.999339  | -8.672334  | -4.940108 |
| 1MJ4 | A | ILE | 22  | E | -6.149236  | 10.773018 | -8.715123  | -5.036620 |
| 1MJ4 | A | TRP | 23  | E | -10.561385 | 16.367366 | -12.406295 | -5.653707 |
| 1MJ4 | A | VAL | 24  | E | -10.359568 | 13.748943 | -12.186949 | -4.653028 |
| 1MJ4 | A | THR | 25  | E | -8.492740  | 12.078596 | -11.494403 | -5.283484 |
| 1MJ4 | A | LEU | 26  | T | -8.260524  | 12.373093 | -11.363823 | -5.195843 |
| 1MJ4 | A | GLY | 27  | T | -8.250559  | 12.420865 | -11.383039 | -5.195365 |
| 1MJ4 | A | SER | 28  | E | -8.250544  | 12.420804 | -11.383178 | -5.195341 |
| 1MJ4 | A | GLU | 29  | E | -8.267143  | 12.388238 | -11.361347 | -5.211223 |
| 1MJ4 | A | VAL | 30  | E | -8.896277  | 13.113172 | -11.167278 | -5.020849 |
| 1MJ4 | A | PHE | 31  | E | -10.474977 | 15.814882 | -12.379865 | -5.113939 |
| 1MJ4 | A | ASP | 32  | T | -10.814448 | 17.374471 | -12.047591 | -5.075665 |
| 1MJ4 | A | VAL | 33  | T | -10.202336 | 18.189580 | -10.733976 | -4.932829 |
| 1MJ4 | A | THR | 34  | T | -9.649420  | 17.509887 | -11.534524 | -5.619310 |
| 1MJ4 | A | GLU | 35  | T | -9.206501  | 16.188362 | -11.619784 | -5.474832 |
| 1MJ4 | A | PHE | 36  | G | -9.209819  | 16.165024 | -11.665238 | -5.494718 |
| 1MJ4 | A | VAL | 37  | G | -8.880946  | 14.073641 | -11.843332 | -5.058717 |
| 1MJ4 | A | ASP | 38  | G | -6.639454  | 7.899471  | -10.289109 | -4.513382 |
| 1MJ4 | A | LEU | 39  | T | -5.403065  | 7.545776  | -9.217383  | -4.627539 |
| 1MJ4 | A | HIS | 40  | T | -5.342651  | 7.546352  | -9.342125  | -4.620878 |
| 1MJ4 | A | PRO | 41  | T | -5.280534  | 7.322343  | -9.515751  | -4.573191 |
| 1MJ4 | A | GLY | 42  | T | -5.259854  | 7.329154  | -9.588342  | -4.581404 |
| 1MJ4 | A | GLY | 43  | H | -5.319175  | 7.282794  | -9.518687  | -4.589799 |
| 1MJ4 | A | PRO | 44  | H | -6.166408  | 6.589859  | -10.953086 | -4.415569 |
| 1MJ4 | A | SER | 45  | H | -6.461385  | 5.933824  | -11.238892 | -4.319775 |
| 1MJ4 | A | LYS | 46  | H | -7.237932  | 7.660083  | -11.655895 | -4.803696 |
| 1MJ4 | A | LEU | 47  | H | -10.128399 | 13.444918 | -13.489723 | -4.889759 |
| 1MJ4 | A | MET | 48  | H | -9.631716  | 13.273302 | -11.987777 | -4.607139 |
| 1MJ4 | A | LEU | 49  | T | -8.795082  | 11.992001 | -11.276182 | -4.450425 |
| 1MJ4 | A | ALA | 50  | T | -8.061771  | 10.695042 | -10.909534 | -4.337992 |
| 1MJ4 | A | ALA | 51  | T | -8.008042  | 10.845673 | -10.949045 | -4.353126 |
| 1MJ4 | A | GLY | 52  | T | -8.003672  | 10.828146 | -10.983382 | -4.360756 |
| 1MJ4 | A | GLY | 53  | B | -8.024304  | 10.735140 | -10.980714 | -4.351114 |
| 1MJ4 | A | PRO | 54  | H | -8.160223  | 10.525023 | -10.961244 | -4.337465 |
| 1MJ4 | A | LEU | 55  | H | -9.262608  | 12.374074 | -11.925293 | -4.560407 |
| 1MJ4 | A | GLU | 56  | H | -10.035089 | 12.137130 | -13.357227 | -4.675492 |
| 1MJ4 | A | PRO | 57  | H | -10.124594 | 13.536026 | -12.408160 | -4.431382 |
| 1MJ4 | A | PHE | 58  | H | -10.569768 | 16.189347 | -11.617412 | -4.477902 |
| 1MJ4 | A | TRP | 59  | H | -10.496558 | 15.532985 | -12.046115 | -4.594331 |
| 1MJ4 | A | ALA | 60  | T | -8.429489  | 7.487959  | -12.355988 | -4.145013 |
| 1MJ4 | A | LEU | 61  | T | -8.410133  | 7.543493  | -12.425339 | -4.161248 |
| 1MJ4 | A | TYR | 62  | G | -8.408280  | 7.435880  | -12.515014 | -4.181570 |
| 1MJ4 | A | ALA | 63  | G | -8.388873  | 7.455316  | -12.622535 | -4.217498 |
| 1MJ4 | A | VAL | 64  | G | -8.392896  | 7.404018  | -12.626351 | -4.215030 |
| 1MJ4 | A | HIS | 65  | C | -9.822607  | 9.129319  | -15.346549 | -5.086708 |

|      |   |     |    |   |            |           |            |           |
|------|---|-----|----|---|------------|-----------|------------|-----------|
| 1MJ4 | A | ASN | 66 | C | -9.279068  | 8.169173  | -14.619535 | -4.941215 |
| 1MJ4 | A | GLN | 67 | H | -9.327974  | 8.018586  | -14.540462 | -4.892985 |
| 1MJ4 | A | SER | 68 | H | -9.420717  | 7.979232  | -14.337991 | -4.810825 |
| 1MJ4 | A | HIS | 69 | H | -9.425976  | 7.979444  | -14.304362 | -4.804528 |
| 1MJ4 | A | VAL | 70 | H | -9.429501  | 7.973442  | -14.280251 | -4.799733 |
| 1MJ4 | A | ARG | 71 | H | -11.272891 | 10.221931 | -15.917938 | -4.625532 |
| 1MJ4 | A | GLU | 72 | H | -10.756146 | 12.288868 | -14.140969 | -4.738587 |
| 1MJ4 | A | LEU | 73 | H | -10.899376 | 12.996712 | -13.730957 | -4.791870 |
| 1MJ4 | A | LEU | 74 | H | -10.920287 | 13.032675 | -13.633064 | -4.791732 |
| 1MJ4 | A | ALA | 75 | H | -10.923578 | 13.018606 | -13.620800 | -4.792188 |
| 1MJ4 | A | GLN | 76 | C | -10.930252 | 13.003409 | -13.593588 | -4.792276 |
| 1MJ4 | A | TYR | 77 | E | -13.087697 | 17.799775 | -16.478393 | -6.309747 |
| 1MJ4 | A | LYS | 78 | E | -13.087697 | 17.799775 | -16.478393 | -6.309747 |
| 1MJ4 | A | ILE | 79 | E | -13.087697 | 17.799775 | -16.478393 | -6.309747 |
| 1MJ4 | A | GLY | 80 | E | -13.087697 | 17.799775 | -16.478393 | -6.309747 |
| 1MWP | A | LEU | 28 | C | -4.553637  | 2.263172  | -5.525961  | -1.096883 |
| 1MWP | A | LEU | 29 | C | -4.553637  | 2.263172  | -5.525961  | -1.096883 |
| 1MWP | A | ALA | 30 | C | -4.553637  | 2.263172  | -5.525961  | -1.096883 |
| 1MWP | A | GLU | 31 | C | -4.553637  | 2.263172  | -5.525961  | -1.096883 |
| 1MWP | A | PRO | 32 | C | -5.969081  | 4.900828  | -6.728509  | -1.773698 |
| 1MWP | A | GLN | 33 | E | -8.089765  | 9.314977  | -11.169821 | -4.551315 |
| 1MWP | A | ILE | 34 | E | -9.830070  | 13.590617 | -12.207271 | -4.981888 |
| 1MWP | A | ALA | 35 | E | -8.953868  | 11.015604 | -11.848797 | -4.770549 |
| 1MWP | A | MET | 36 | E | -8.939088  | 10.959426 | -11.893812 | -4.748081 |
| 1MWP | A | PHE | 37 | E | -8.933838  | 10.930535 | -11.914786 | -4.736969 |
| 1MWP | A | CYS | 38 | T | -8.933448  | 10.926532 | -11.918909 | -4.736378 |
| 1MWP | A | GLY | 39 | T | -8.990076  | 10.578712 | -12.048705 | -4.805819 |
| 1MWP | A | ARG | 40 | E | -10.857979 | 9.056900  | -13.819837 | -3.768024 |
| 1MWP | A | LEU | 41 | E | -11.557786 | 8.777662  | -14.048505 | -3.397435 |
| 1MWP | A | ASN | 42 | E | -13.108223 | 7.275764  | -17.261889 | -3.780718 |
| 1MWP | A | MET | 43 | E | -14.678462 | 12.037908 | -18.042047 | -4.233662 |
| 1MWP | A | HIS | 44 | E | -12.816815 | 10.820043 | -16.160168 | -4.322778 |
| 1MWP | A | MET | 45 | E | -10.803682 | 7.613989  | -15.898658 | -4.785332 |
| 1MWP | A | ASN | 46 | E | -8.021470  | 3.727018  | -11.390776 | -2.943272 |
| 1MWP | A | VAL | 47 | T | -7.367703  | 3.260462  | -11.044925 | -2.739445 |
| 1MWP | A | GLN | 48 | T | -7.328296  | 3.513211  | -11.062855 | -2.780869 |
| 1MWP | A | ASN | 49 | T | -7.322001  | 3.572355  | -11.093982 | -2.802933 |
| 1MWP | A | GLY | 50 | T | -7.323267  | 3.565746  | -11.084005 | -2.799080 |
| 1MWP | A | LYS | 51 | E | -7.538795  | 3.510710  | -10.967625 | -2.743261 |
| 1MWP | A | TRP | 52 | E | -8.857422  | 7.490487  | -11.747441 | -3.610483 |
| 1MWP | A | ASP | 53 | E | -9.980067  | 9.192659  | -14.156316 | -4.895075 |
| 1MWP | A | SER | 54 | C | -10.471815 | 7.025615  | -15.614804 | -4.545395 |
| 1MWP | A | ASP | 55 | T | -8.594077  | 6.622032  | -13.374062 | -4.624927 |
| 1MWP | A | PRO | 56 | T | -8.135962  | 5.536635  | -12.346579 | -3.704064 |
| 1MWP | A | SER | 57 | T | -8.072664  | 5.378793  | -12.435801 | -3.641891 |
| 1MWP | A | GLY | 58 | T | -7.976360  | 5.226778  | -12.545740 | -3.623032 |
| 1MWP | A | THR | 59 | C | -7.954732  | 5.315281  | -12.588646 | -3.657881 |
| 1MWP | A | LYS | 60 | C | -7.897734  | 5.243104  | -12.708548 | -3.773227 |
| 1MWP | A | THR | 61 | B | -6.641025  | 3.191378  | -9.560211  | -2.488829 |
| 1MWP | A | CYS | 62 | C | -6.432360  | 3.318087  | -9.636846  | -2.532351 |
| 1MWP | A | ILE | 63 | C | -6.012664  | 3.219519  | -9.136521  | -2.374552 |
| 1MWP | A | ASP | 64 | C | -5.383435  | 2.942259  | -9.963560  | -3.338378 |
| 1MWP | A | THR | 65 | C | -5.377562  | 2.990416  | -9.969756  | -3.346221 |
| 1MWP | A | LYS | 66 | H | -5.446100  | 2.991569  | -10.059608 | -3.469394 |
| 1MWP | A | GLU | 67 | H | -5.480539  | 2.956699  | -10.071021 | -3.518608 |
| 1MWP | A | GLY | 68 | H | -5.619440  | 2.909008  | -10.433168 | -3.857552 |
| 1MWP | A | ILE | 69 | H | -7.811136  | 7.207972  | -11.597738 | -4.224166 |
| 1MWP | A | LEU | 70 | H | -9.435757  | 7.098629  | -11.399680 | -2.594024 |
| 1MWP | A | GLN | 71 | H | -9.581699  | 6.835327  | -11.285225 | -2.557161 |
| 1MWP | A | TYR | 72 | H | -12.653345 | 12.354362 | -14.135446 | -3.457663 |
| 1MWP | A | CYS | 73 | H | -13.590510 | 13.068362 | -16.946213 | -4.390239 |
| 1MWP | A | GLN | 74 | H | -12.222477 | 13.636466 | -15.651078 | -5.390543 |
| 1MWP | A | GLU | 75 | H | -9.303532  | 10.434428 | -11.539776 | -4.116579 |
| 1MWP | A | VAL | 76 | H | -8.188854  | 9.556982  | -7.771307  | -2.066475 |
| 1MWP | A | TYR | 77 | T | -8.062688  | 9.273195  | -8.081653  | -2.082970 |
| 1MWP | A | PRO | 78 | T | -6.258021  | 8.817322  | -6.540554  | -2.646855 |
| 1MWP | A | GLU | 79 | T | -5.148711  | 10.848166 | -7.362242  | -5.284230 |
| 1MWP | A | LEU | 80 | T | -5.145738  | 10.854789 | -7.378365  | -5.286852 |
| 1MWP | A | GLN | 81 | C | -5.148443  | 10.862332 | -7.380551  | -5.303702 |
| 1MWP | A | ILE | 82 | E | -5.148329  | 10.866325 | -7.378787  | -5.303381 |
| 1MWP | A | THR | 83 | E | -5.236984  | 11.211270 | -7.543741  | -5.731028 |
| 1MWP | A | ASN | 84 | E | -7.565996  | 10.899429 | -9.430322  | -3.937299 |
| 1MWP | A | VAL | 85 | E | -6.427371  | 9.990824  | -7.984742  | -3.857030 |
| 1MWP | A | VAL | 86 | E | -5.721641  | 7.022208  | -7.123439  | -2.762439 |
| 1MWP | A | GLU | 87 | E | -4.911146  | 6.636416  | -5.643391  | -2.340198 |
| 1MWP | A | ALA | 88 | C | -4.798423  | 6.313685  | -5.724489  | -2.200918 |
| 1MWP | A | ASN | 89 | C | -4.256210  | 6.869895  | -5.549176  | -2.609122 |
| 1MWP | A | GLN | 90 | C | -4.253252  | 6.906342  | -5.517132  | -2.593623 |
| 1MWP | A | PRO | 91 | C | -4.287906  | 6.984636  | -5.441981  | -2.611239 |
| 1MWP | A | VAL | 92 | E | -4.466181  | 7.152717  | -5.550043  | -2.756335 |
| 1MWP | A | THR | 93 | E | -4.529426  | 7.406808  | -5.480399  | -2.889570 |



|      |   |     |     |   |            |           |            |           |
|------|---|-----|-----|---|------------|-----------|------------|-----------|
| 1MWP | A | ILE | 94  | E | -6.313926  | 10.629307 | -6.421338  | -3.053664 |
| 1MWP | A | GLN | 95  | E | -7.729791  | 9.913642  | -7.175913  | -2.086760 |
| 1MWP | A | ASN | 96  | C | -8.302413  | 9.404088  | -8.179742  | -2.410826 |
| 1MWP | A | TRP | 97  | C | -10.347806 | 13.714409 | -10.444212 | -3.470755 |
| 1MWP | A | CYS | 98  | B | -10.111383 | 7.256673  | -13.341281 | -3.437159 |
| 1MWP | A | LYS | 99  | B | -8.977302  | 7.298326  | -13.128223 | -4.234416 |
| 1MWP | A | ARG | 100 | G | -8.218419  | 6.887972  | -13.025307 | -4.531017 |
| 1MWP | A | GLY | 101 | G | -7.979674  | 6.067050  | -12.846759 | -4.189154 |
| 1MWP | A | ARG | 102 | G | -7.978747  | 6.050952  | -12.857928 | -4.188269 |
| 1MWP | A | LYS | 103 | B | -7.940617  | 5.815674  | -12.948656 | -4.146402 |
| 1MWP | A | GLN | 104 | T | -7.725051  | 5.153670  | -13.114885 | -4.177444 |
| 1MWP | A | CYS | 105 | T | -6.539900  | 5.376932  | -10.863280 | -4.099830 |
| 1MWP | A | LYS | 106 | C | -6.438105  | 5.392140  | -10.486496 | -3.798490 |
| 1MWP | A | THR | 107 | C | -6.183294  | 6.250983  | -9.129732  | -3.224638 |
| 1MWP | A | HIS | 108 | C | -6.180097  | 6.288540  | -9.102008  | -3.210293 |
| 1MWP | A | PRO | 109 | E | -6.194322  | 6.380373  | -8.968994  | -3.176278 |
| 1MWP | A | HIS | 110 | E | -6.607923  | 7.354556  | -7.283926  | -2.222718 |
| 1MWP | A | PHE | 111 | E | -6.771627  | 8.017582  | -6.728809  | -2.175391 |
| 1MWP | A | VAL | 112 | E | -8.479369  | 10.889196 | -8.737125  | -2.477786 |
| 1MWP | A | ILE | 113 | C | -8.853942  | 12.711704 | -8.993700  | -3.037766 |
| 1MWP | A | PRO | 114 | C | -9.376746  | 13.300153 | -8.947753  | -2.993559 |
| 1MWP | A | TYR | 115 | E | -10.401375 | 14.324494 | -7.592104  | -1.867489 |
| 1MWP | A | ARG | 116 | E | -9.207103  | 9.239972  | -12.821716 | -5.133317 |
| 1MWP | A | CYS | 117 | E | -5.124390  | 6.275884  | -7.651199  | -4.002550 |
| 1MWP | A | LEU | 118 | E | -3.425957  | 5.174888  | -4.815371  | -2.914220 |
| 1MWP | A | VAL | 119 | E | -0.873425  | 3.243195  | -1.969575  | -2.339848 |
| 1MWP | A | GLY | 120 | C | 0.229191   | 4.018354  | -2.723485  | -3.614369 |
| 1MWP | A | GLU | 121 | C | 0.229191   | 4.018354  | -2.723485  | -3.614369 |
| 1MWP | A | PHE | 122 | C | 0.229191   | 4.018354  | -2.723485  | -3.614369 |
| 1MWP | A | VAL | 123 | C | 0.229191   | 4.018354  | -2.723485  | -3.614369 |
| 1N6H | A | GLY | 15  | C | -2.223615  | 2.194701  | -6.696795  | -3.551751 |
| 1N6H | A | ASN | 16  | C | -2.223615  | 2.194701  | -6.696795  | -3.551751 |
| 1N6H | A | LYS | 17  | E | -2.223615  | 2.194701  | -6.696795  | -3.551751 |
| 1N6H | A | ILE | 18  | E | -2.223615  | 2.194701  | -6.696795  | -3.551751 |
| 1N6H | A | CYS | 19  | E | -3.157012  | 3.069282  | -7.965825  | -4.240946 |
| 1N6H | A | GLN | 20  | E | -5.077050  | 5.242431  | -10.889282 | -5.575806 |
| 1N6H | A | PHE | 21  | E | -8.214653  | 10.710379 | -13.408907 | -6.643428 |
| 1N6H | A | LYS | 22  | E | -12.005996 | 14.368252 | -18.357256 | -7.838543 |
| 1N6H | A | LEU | 23  | E | -10.154320 | 17.474422 | -9.316527  | -4.270627 |
| 1N6H | A | VAL | 24  | E | -10.135098 | 17.404615 | -9.455244  | -4.290860 |
| 1N6H | A | LEU | 25  | E | -10.126628 | 17.367523 | -9.538134  | -4.307073 |
| 1N6H | A | LEU | 26  | E | -10.005892 | 15.985508 | -10.643337 | -4.466476 |
| 1N6H | A | GLY | 27  | C | -9.350601  | 10.191960 | -13.409817 | -4.796547 |
| 1N6H | A | GLU | 28  | T | -8.723783  | 7.674603  | -14.076054 | -5.017999 |
| 1N6H | A | SER | 29  | T | -8.638729  | 7.834654  | -14.125743 | -5.028480 |
| 1N6H | A | ALA | 30  | T | -8.633227  | 7.843013  | -14.147237 | -5.030363 |
| 1N6H | A | VAL | 31  | T | -8.642873  | 7.812267  | -14.127408 | -5.028769 |
| 1N6H | A | GLY | 32  | C | -8.776480  | 7.939407  | -13.965460 | -5.047175 |
| 1N6H | A | LYS | 33  | H | -9.762353  | 9.095752  | -14.618826 | -5.115574 |
| 1N6H | A | SER | 34  | H | -11.151334 | 10.320795 | -16.337079 | -5.295875 |
| 1N6H | A | SER | 35  | H | -11.925899 | 12.740020 | -16.376328 | -5.403869 |
| 1N6H | A | LEU | 36  | H | -12.377383 | 14.422244 | -15.783145 | -5.279977 |
| 1N6H | A | VAL | 37  | H | -12.759117 | 15.810925 | -14.754394 | -4.828461 |
| 1N6H | A | LEU | 38  | H | -12.734040 | 15.992404 | -14.694945 | -4.840705 |
| 1N6H | A | ARG | 39  | H | -10.158873 | 14.414445 | -12.478229 | -5.429556 |
| 1N6H | A | PHE | 40  | H | -8.931705  | 12.360825 | -11.961367 | -5.237820 |
| 1N6H | A | VAL | 41  | H | -7.905931  | 12.394944 | -10.787318 | -5.277158 |
| 1N6H | A | LYS | 42  | H | -7.575977  | 12.210782 | -11.027315 | -5.452472 |
| 1N6H | A | GLY | 43  | C | -7.499791  | 12.196553 | -11.196560 | -5.507708 |
| 1N6H | A | GLN | 44  | C | -7.366497  | 12.045847 | -11.302026 | -5.524482 |
| 1N6H | A | PHE | 45  | C | -7.000645  | 11.819801 | -10.952062 | -5.586498 |
| 1N6H | A | HIS | 46  | T | -5.712242  | 7.570789  | -10.356867 | -5.252566 |
| 1N6H | A | GLU | 47  | T | -5.656131  | 7.348439  | -10.565466 | -5.249435 |
| 1N6H | A | PHE | 48  | T | -5.642549  | 7.327511  | -10.625074 | -5.253015 |
| 1N6H | A | GLN | 49  | T | -5.621229  | 7.208493  | -10.722360 | -5.238856 |
| 1N6H | A | GLU | 50  | C | -5.538162  | 6.644367  | -10.869101 | -5.093511 |
| 1N6H | A | SER | 51  | C | -6.158374  | 5.757028  | -12.031533 | -4.810411 |
| 1N6H | A | THR | 52  | T | -6.156039  | 6.093191  | -11.390594 | -4.453316 |
| 1N6H | A | ILE | 53  | T | -5.894125  | 7.940684  | -9.760766  | -4.184942 |
| 1N6H | A | GLY | 54  | T | -5.924928  | 8.230751  | -9.493177  | -4.120792 |
| 1N6H | A | ALA | 55  | E | -6.064491  | 10.518384 | -8.225376  | -3.956225 |
| 1N6H | A | ALA | 56  | E | -6.103924  | 10.721091 | -8.006417  | -3.928306 |
| 1N6H | A | PHE | 57  | E | -6.247152  | 11.781471 | -7.463849  | -3.968969 |
| 1N6H | A | LEU | 58  | E | -6.992732  | 14.222175 | -7.481108  | -4.188644 |
| 1N6H | A | THR | 59  | E | -6.335062  | 11.513060 | -8.462490  | -4.541752 |
| 1N6H | A | GLN | 60  | E | -6.464700  | 10.673605 | -9.047233  | -4.687238 |
| 1N6H | A | THR | 61  | E | -6.134749  | 10.327379 | -8.970950  | -4.549957 |
| 1N6H | A | VAL | 62  | E | -6.088175  | 10.015751 | -9.143164  | -4.513396 |
| 1N6H | A | CYS | 63  | E | -5.603580  | 8.910589  | -9.190545  | -4.557846 |
| 1N6H | A | LEU | 64  | E | -5.674755  | 8.532670  | -9.798399  | -4.845232 |
| 1N6H | A | ASP | 65  | T | -5.660331  | 8.467222  | -10.028978 | -4.973472 |

|      |   |     |     |   |            |           |            |           |
|------|---|-----|-----|---|------------|-----------|------------|-----------|
| 1N6H | A | ASP | 66  | T | -5.786036  | 8.138224  | -10.314100 | -5.123894 |
| 1N6H | A | THR | 67  | E | -5.819701  | 8.150250  | -10.282967 | -5.175572 |
| 1N6H | A | THR | 68  | E | -6.801352  | 8.473587  | -14.740037 | -7.643481 |
| 1N6H | A | VAL | 69  | E | -7.564151  | 8.141107  | -15.920417 | -8.051381 |
| 1N6H | A | LYS | 70  | E | -9.668916  | 12.934998 | -18.015195 | -9.397993 |
| 1N6H | A | PHE | 71  | E | -11.499062 | 18.274010 | -12.858130 | -5.374153 |
| 1N6H | A | GLU | 72  | E | -11.672776 | 18.716730 | -12.621651 | -5.410696 |
| 1N6H | A | ILE | 73  | E | -12.125535 | 19.024297 | -12.849061 | -5.176891 |
| 1N6H | A | TRP | 74  | E | -11.780396 | 15.711981 | -14.143784 | -5.302991 |
| 1N6H | A | ASP | 75  | E | -11.662340 | 14.836011 | -14.884659 | -5.444738 |
| 1N6H | A | THR | 76  | E | -11.030129 | 11.383962 | -16.291532 | -5.765023 |
| 1N6H | A | ALA | 77  | C | -10.406615 | 9.188698  | -16.314861 | -5.511061 |
| 1N6H | A | GLY | 78  | C | -10.392276 | 9.053336  | -16.435189 | -5.526871 |
| 1N6H | A | GLN | 79  | C | -10.436018 | 8.549237  | -16.636381 | -5.540758 |
| 1N6H | A | GLU | 80  | G | -10.433329 | 8.492933  | -16.631637 | -5.509176 |
| 1N6H | A | ARG | 81  | G | -10.579913 | 8.202104  | -16.516203 | -5.354885 |
| 1N6H | A | TYR | 82  | G | -11.518543 | 10.462408 | -16.667572 | -4.929756 |
| 1N6H | A | HIS | 83  | G | -10.230662 | 9.247034  | -13.539614 | -3.908754 |
| 1N6H | A | SER | 84  | G | -9.377094  | 8.710688  | -12.818221 | -3.798119 |
| 1N6H | A | LEU | 85  | G | -9.342405  | 8.965762  | -12.805388 | -3.829928 |
| 1N6H | A | ALA | 86  | H | -9.344156  | 8.964542  | -12.792875 | -3.827815 |
| 1N6H | A | PRO | 87  | H | -9.349262  | 8.941028  | -12.775002 | -3.822182 |
| 1N6H | A | MET | 88  | H | -9.485486  | 8.914310  | -12.642038 | -3.820010 |
| 1N6H | A | TYR | 89  | H | -10.934123 | 13.262202 | -13.100396 | -4.457725 |
| 1N6H | A | TYR | 90  | H | -10.911783 | 12.781817 | -13.956640 | -4.955434 |
| 1N6H | A | ARG | 91  | H | -9.114269  | 8.752222  | -12.704538 | -4.275913 |
| 1N6H | A | GLY | 92  | C | -8.470563  | 9.404059  | -11.834168 | -4.218196 |
| 1N6H | A | ALA | 93  | T | -8.445962  | 9.561922  | -11.804246 | -4.201497 |
| 1N6H | A | GLN | 94  | T | -8.425618  | 9.713285  | -11.766660 | -4.184432 |
| 1N6H | A | ALA | 95  | E | -8.346568  | 10.390055 | -11.296088 | -4.045409 |
| 1N6H | A | ALA | 96  | E | -8.523252  | 11.065869 | -10.819994 | -3.975649 |
| 1N6H | A | ILE | 97  | E | -9.285820  | 14.564983 | -9.322210  | -3.417142 |
| 1N6H | A | VAL | 98  | E | -9.395065  | 14.825516 | -8.957832  | -3.336470 |
| 1N6H | A | VAL | 99  | E | -9.508331  | 14.986915 | -8.590274  | -3.259112 |
| 1N6H | A | TYR | 100 | E | -11.520024 | 17.810814 | -11.944373 | -4.374699 |
| 1N6H | A | ASP | 101 | E | -9.744814  | 11.265271 | -13.406310 | -5.267806 |
| 1N6H | A | ILE | 102 | T | -9.259336  | 10.376878 | -13.538762 | -5.138081 |
| 1N6H | A | THR | 103 | T | -9.135243  | 9.870861  | -13.984161 | -5.197910 |
| 1N6H | A | ASN | 104 | T | -9.132750  | 9.864513  | -14.002330 | -5.200568 |
| 1N6H | A | GLU | 105 | H | -9.122164  | 9.870647  | -14.028695 | -5.197557 |
| 1N6H | A | GLU | 106 | H | -9.370365  | 9.207455  | -14.361151 | -5.159529 |
| 1N6H | A | SER | 107 | H | -10.039977 | 8.156601  | -15.874403 | -5.422667 |
| 1N6H | A | PHE | 108 | H | -11.263067 | 11.046209 | -15.808251 | -5.229564 |
| 1N6H | A | ALA | 109 | H | -11.363135 | 10.893579 | -15.687352 | -5.119079 |
| 1N6H | A | ARG | 110 | H | -12.753854 | 10.761285 | -17.629912 | -5.071757 |
| 1N6H | A | ALA | 111 | H | -12.601831 | 12.178605 | -17.000416 | -5.084743 |
| 1N6H | A | LYS | 112 | H | -12.515225 | 12.618464 | -16.952641 | -5.174578 |
| 1N6H | A | ASN | 113 | H | -12.546184 | 12.504253 | -16.983125 | -5.190678 |
| 1N6H | A | TRP | 114 | H | -13.104055 | 16.236243 | -15.943457 | -5.412418 |
| 1N6H | A | VAL | 115 | H | -13.069446 | 15.993795 | -16.133306 | -5.428633 |
| 1N6H | A | LYS | 116 | H | -12.295553 | 11.161530 | -17.212240 | -5.377390 |
| 1N6H | A | GLU | 117 | H | -11.757931 | 10.592196 | -16.973025 | -5.363297 |
| 1N6H | A | LEU | 118 | H | -9.578080  | 11.272676 | -12.475380 | -4.702389 |
| 1N6H | A | GLN | 119 | H | -9.363523  | 10.425713 | -13.132188 | -4.724475 |
| 1N6H | A | ARG | 120 | H | -7.811054  | 7.082552  | -11.620350 | -3.979687 |
| 1N6H | A | GLN | 121 | H | -5.872891  | 5.399522  | -9.761530  | -3.886458 |
| 1N6H | A | ALA | 122 | C | -5.198359  | 6.397545  | -8.356340  | -3.577436 |
| 1N6H | A | SER | 123 | T | -5.062523  | 6.752514  | -8.251625  | -3.559394 |
| 1N6H | A | PRO | 124 | T | -4.928812  | 7.668452  | -7.846862  | -3.570855 |
| 1N6H | A | ASN | 125 | T | -4.928782  | 7.716839  | -7.819081  | -3.569004 |
| 1N6H | A | ILE | 126 | T | -5.057628  | 8.297202  | -7.364066  | -3.492390 |
| 1N6H | A | VAL | 127 | E | -5.512603  | 9.947437  | -6.982422  | -3.562074 |
| 1N6H | A | ILE | 128 | E | -5.854710  | 11.365063 | -6.302853  | -3.617645 |
| 1N6H | A | ALA | 129 | E | -7.831380  | 13.636584 | -7.697254  | -3.672042 |
| 1N6H | A | LEU | 130 | E | -9.836245  | 16.345844 | -9.908891  | -3.969504 |
| 1N6H | A | SER | 131 | E | -10.272412 | 14.542728 | -12.002580 | -4.484263 |
| 1N6H | A | GLY | 132 | E | -10.320994 | 13.770247 | -12.643949 | -4.671072 |
| 1N6H | A | ASN | 133 | E | -10.900191 | 10.874682 | -16.365466 | -5.471799 |
| 1N6H | A | LYS | 134 | T | -9.212342  | 10.931374 | -12.987699 | -5.239562 |
| 1N6H | A | ALA | 135 | G | -6.955189  | 8.638392  | -10.659268 | -4.846277 |
| 1N6H | A | ASP | 136 | G | -5.935780  | 7.035694  | -10.420305 | -4.814114 |
| 1N6H | A | LEU | 137 | G | -5.861732  | 7.117830  | -10.478941 | -4.787574 |
| 1N6H | A | ALA | 138 | G | -5.772674  | 7.012185  | -10.544183 | -4.710264 |
| 1N6H | A | ASN | 139 | G | -5.772398  | 7.008349  | -10.543969 | -4.707491 |
| 1N6H | A | LYS | 140 | C | -5.856548  | 6.768243  | -10.535838 | -4.687472 |
| 1N6H | A | ARG | 141 | C | -6.607021  | 6.977740  | -10.963217 | -4.382306 |
| 1N6H | A | ALA | 142 | C | -6.918890  | 6.473100  | -11.007658 | -4.240424 |
| 1N6H | A | VAL | 143 | C | -8.345549  | 9.664694  | -12.372553 | -4.687621 |
| 1N6H | A | ASP | 144 | C | -7.869949  | 9.256285  | -12.060170 | -4.831092 |
| 1N6H | A | PHE | 145 | H | -7.878656  | 9.241367  | -12.036214 | -4.834891 |
| 1N6H | A | GLN | 146 | H | -7.879668  | 9.236317  | -12.033007 | -4.835424 |

|      |   |     |     |   |            |           |            |           |
|------|---|-----|-----|---|------------|-----------|------------|-----------|
| 1N6H | A | GLU | 147 | H | -7.901422  | 9.186741  | -11.993527 | -4.840145 |
| 1N6H | A | ALA | 148 | H | -8.108572  | 8.983493  | -11.925011 | -4.839917 |
| 1N6H | A | GLN | 149 | H | -12.022436 | 9.492880  | -17.540002 | -5.068038 |
| 1N6H | A | SER | 150 | H | -11.292622 | 9.005596  | -16.235353 | -4.818790 |
| 1N6H | A | TYR | 151 | H | -10.876400 | 9.281741  | -16.090885 | -5.057251 |
| 1N6H | A | ALA | 152 | H | -8.681586  | 5.043917  | -14.302498 | -4.482002 |
| 1N6H | A | ASP | 153 | H | -8.214495  | 6.098680  | -13.759435 | -4.591293 |
| 1N6H | A | ASP | 154 | H | -8.185708  | 6.294866  | -13.738808 | -4.589881 |
| 1N6H | A | ASN | 155 | H | -8.187711  | 6.294895  | -13.727393 | -4.589052 |
| 1N6H | A | SER | 156 | C | -8.190484  | 6.290462  | -13.710777 | -4.584897 |
| 1N6H | A | LEU | 157 | C | -8.519028  | 7.297348  | -13.305371 | -4.672138 |
| 1N6H | A | LEU | 158 | E | -9.955926  | 10.638258 | -13.295173 | -4.571200 |
| 1N6H | A | PHE | 159 | E | -11.625460 | 17.084621 | -12.872853 | -4.749382 |
| 1N6H | A | MET | 160 | E | -11.924854 | 17.276312 | -13.096125 | -4.819599 |
| 1N6H | A | GLU | 161 | E | -12.259825 | 14.976477 | -16.225208 | -5.751268 |
| 1N6H | A | THR | 162 | C | -10.234124 | 10.661493 | -14.509887 | -5.373015 |
| 1N6H | A | SER | 163 | T | -9.807021  | 10.063551 | -14.559054 | -5.240572 |
| 1N6H | A | ALA | 164 | T | -8.654648  | 10.133999 | -12.847718 | -5.188194 |
| 1N6H | A | LYS | 165 | T | -8.279253  | 9.571649  | -13.223404 | -5.373375 |
| 1N6H | A | THR | 166 | T | -7.980656  | 9.801262  | -12.720994 | -5.218543 |
| 1N6H | A | SER | 167 | T | -7.953367  | 9.786987  | -12.740827 | -5.205144 |
| 1N6H | A | MET | 168 | T | -7.873372  | 9.743030  | -12.738795 | -5.177083 |
| 1N6H | A | ASN | 169 | T | -7.848245  | 10.030662 | -12.477909 | -5.117964 |
| 1N6H | A | VAL | 170 | H | -7.982461  | 10.531356 | -12.079804 | -4.972797 |
| 1N6H | A | ASN | 171 | H | -8.279585  | 10.805442 | -12.163204 | -4.966722 |
| 1N6H | A | GLU | 172 | H | -8.350288  | 10.942221 | -11.984210 | -4.954843 |
| 1N6H | A | ILE | 173 | H | -8.583089  | 11.688606 | -11.500185 | -4.932209 |
| 1N6H | A | PHE | 174 | H | -9.940173  | 16.785395 | -10.643387 | -4.831445 |
| 1N6H | A | MET | 175 | H | -8.712510  | 18.502504 | -8.910849  | -5.751105 |
| 1N6H | A | ALA | 176 | H | -6.408880  | 15.735758 | -5.896307  | -4.620448 |
| 1N6H | A | ILE | 177 | H | -5.463146  | 14.062770 | -5.151803  | -4.054114 |
| 1N6H | A | ALA | 178 | H | -4.011839  | 9.725950  | -4.419374  | -3.268322 |
| 1N6H | A | LYS | 179 | H | -4.011839  | 9.725950  | -4.419374  | -3.268322 |
| 1N6H | A | LYS | 180 | H | -4.011839  | 9.725950  | -4.419374  | -3.268322 |
| 1N6H | A | LEU | 181 | C | -4.011839  | 9.725950  | -4.419374  | -3.268322 |
| 1NKR | A | ARG | 6   | C | -8.604228  | 8.769063  | -10.765084 | -3.359139 |
| 1NKR | A | LYS | 7   | C | -8.604228  | 8.769063  | -10.765084 | -3.359139 |
| 1NKR | A | PRO | 8   | C | -8.604228  | 8.769063  | -10.765084 | -3.359139 |
| 1NKR | A | SER | 9   | E | -8.604228  | 8.769063  | -10.765084 | -3.359139 |
| 1NKR | A | LEU | 10  | E | -8.413086  | 11.321604 | -9.698751  | -3.788747 |
| 1NKR | A | LEU | 11  | E | -6.090303  | 7.257425  | -8.654106  | -3.702395 |
| 1NKR | A | ALA | 12  | E | -5.669259  | 7.424733  | -8.368878  | -3.587919 |
| 1NKR | A | HIS | 13  | E | -5.592823  | 7.652354  | -8.401498  | -3.612866 |
| 1NKR | A | PRO | 14  | T | -5.495295  | 8.032592  | -8.263392  | -3.586068 |
| 1NKR | A | GLY | 15  | T | -5.492751  | 8.063161  | -8.261074  | -3.590557 |
| 1NKR | A | PRO | 16  | C | -5.753890  | 8.567793  | -8.055161  | -3.529914 |
| 1NKR | A | LEU | 17  | E | -6.271332  | 9.997010  | -8.025685  | -3.616212 |
| 1NKR | A | VAL | 18  | E | -6.433562  | 10.162326 | -8.185138  | -3.703065 |
| 1NKR | A | LYS | 19  | E | -6.508867  | 8.664870  | -10.326348 | -4.641913 |
| 1NKR | A | SER | 20  | T | -6.505371  | 8.465147  | -10.457102 | -4.658865 |
| 1NKR | A | GLU | 21  | T | -6.500588  | 8.441585  | -10.485190 | -4.658963 |
| 1NKR | A | GLU | 22  | b | -6.504625  | 8.403749  | -10.482664 | -4.651393 |
| 1NKR | A | THR | 23  | C | -6.643287  | 8.242307  | -10.468383 | -4.674347 |
| 1NKR | A | VAL | 24  | E | -7.916483  | 9.862174  | -11.005618 | -4.345971 |
| 1NKR | A | ILE | 25  | E | -8.713010  | 10.991647 | -11.184973 | -4.212550 |
| 1NKR | A | LEU | 26  | E | -9.316589  | 12.981215 | -10.066631 | -3.898961 |
| 1NKR | A | GLN | 27  | E | -11.636782 | 14.139823 | -13.717288 | -4.652030 |
| 1NKR | A | CYS | 28  | E | -11.468163 | 10.089276 | -16.323599 | -5.241899 |
| 1NKR | A | TRP | 29  | E | -10.182912 | 10.608504 | -14.406259 | -5.203910 |
| 1NKR | A | SER | 30  | E | -9.820025  | 11.377910 | -13.909447 | -5.178785 |
| 1NKR | A | ASP | 31  | T | -9.732888  | 11.468969 | -13.950290 | -5.182752 |
| 1NKR | A | VAL | 32  | T | -9.726342  | 11.508819 | -13.957891 | -5.185691 |
| 1NKR | A | MET | 33  | T | -9.755802  | 11.597590 | -13.840800 | -5.183601 |
| 1NKR | A | PHE | 34  | T | -10.092719 | 12.287772 | -13.586604 | -5.172277 |
| 1NKR | A | GLU | 35  | T | -10.860398 | 12.283655 | -14.279133 | -5.232258 |
| 1NKR | A | HIS | 36  | E | -12.339716 | 14.961975 | -15.033479 | -5.498808 |
| 1NKR | A | PHE | 37  | E | -14.387122 | 19.606803 | -16.250050 | -5.634956 |
| 1NKR | A | LEU | 38  | E | -14.479637 | 19.413561 | -16.351301 | -5.625695 |
| 1NKR | A | LEU | 39  | E | -14.314174 | 17.001236 | -17.698410 | -5.777033 |
| 1NKR | A | HIS | 40  | E | -14.154067 | 12.483366 | -20.331098 | -6.164741 |
| 1NKR | A | ARG | 41  | E | -12.869390 | 10.666816 | -18.657211 | -5.856081 |
| 1NKR | A | GLU | 42  | E | -7.324979  | 7.058825  | -12.218668 | -5.207894 |
| 1NKR | A | GLY | 43  | E | -7.093981  | 6.856625  | -12.490994 | -5.183923 |
| 1NKR | A | MET | 44  | T | -7.055878  | 6.970245  | -12.536028 | -5.184105 |
| 1NKR | A | PHE | 45  | T | -7.045417  | 7.005587  | -12.551786 | -5.177191 |
| 1NKR | A | ASN | 46  | T | -6.894752  | 7.543566  | -12.136461 | -5.033484 |
| 1NKR | A | ASP | 47  | E | -7.268069  | 8.116520  | -12.030464 | -4.852611 |
| 1NKR | A | THR | 48  | E | -7.471423  | 10.018933 | -10.805452 | -4.478018 |
| 1NKR | A | LEU | 49  | E | -7.495352  | 10.335038 | -10.451104 | -4.336972 |
| 1NKR | A | ARG | 50  | E | -7.412776  | 10.261646 | -10.484581 | -4.301045 |
| 1NKR | A | LEU | 51  | E | -7.484348  | 9.887322  | -10.539905 | -4.067482 |

|      |   |     |     |   |            |           |            |           |
|------|---|-----|-----|---|------------|-----------|------------|-----------|
| 1NKR | A | ILE | 52  | E | -6.457979  | 6.827850  | -10.570312 | -4.286023 |
| 1NKR | A | GLY | 53  | C | -5.023794  | 5.228930  | -9.758818  | -4.618464 |
| 1NKR | A | GLU | 54  | E | -4.306232  | 4.968630  | -9.419775  | -4.712713 |
| 1NKR | A | HIS | 55  | E | -3.613560  | 5.993932  | -7.887963  | -4.575544 |
| 1NKR | A | HIS | 56  | E | -3.599510  | 5.995877  | -7.938168  | -4.577758 |
| 1NKR | A | ASP | 57  | T | -3.603056  | 5.996207  | -7.923328  | -4.579784 |
| 1NKR | A | GLY | 58  | T | -3.654684  | 6.075707  | -7.760803  | -4.571879 |
| 1NKR | A | VAL | 59  | E | -3.813070  | 6.442033  | -7.290418  | -4.512785 |
| 1NKR | A | SER | 60  | E | -5.790700  | 6.199238  | -10.091914 | -4.654374 |
| 1NKR | A | LYS | 61  | E | -7.852875  | 8.872248  | -12.371493 | -5.290356 |
| 1NKR | A | ALA | 62  | E | -9.537063  | 13.000157 | -13.749949 | -5.612790 |
| 1NKR | A | ASN | 63  | E | -9.162623  | 13.463067 | -11.217992 | -4.565570 |
| 1NKR | A | PHE | 64  | E | -9.137078  | 13.552469 | -10.889160 | -4.365265 |
| 1NKR | A | SER | 65  | E | -9.094146  | 13.449757 | -11.013759 | -4.360861 |
| 1NKR | A | ILE | 66  | E | -9.114845  | 13.344747 | -10.973632 | -4.302684 |
| 1NKR | A | SER | 67  | T | -9.216333  | 13.106489 | -11.042853 | -4.300881 |
| 1NKR | A | ARG | 68  | T | -9.957368  | 12.709675 | -12.491408 | -4.308258 |
| 1NKR | A | MET | 69  | b | -10.314825 | 12.062694 | -13.518092 | -4.537463 |
| 1NKR | A | THR | 70  | C | -10.070235 | 11.504200 | -13.882664 | -4.991168 |
| 1NKR | A | GLN | 71  | G | -9.927889  | 11.347526 | -14.012906 | -5.122905 |
| 1NKR | A | ASP | 72  | G | -9.826634  | 11.335398 | -13.966964 | -5.079755 |
| 1NKR | A | LEU | 73  | G | -9.839598  | 11.341577 | -13.912478 | -5.068214 |
| 1NKR | A | ALA | 74  | C | -9.851658  | 11.317134 | -13.864730 | -5.054806 |
| 1NKR | A | GLY | 75  | E | -10.253360 | 11.297858 | -14.097022 | -5.038677 |
| 1NKR | A | THR | 76  | E | -10.785642 | 11.245630 | -14.160970 | -4.885361 |
| 1NKR | A | TYR | 77  | E | -12.940275 | 15.397605 | -15.976683 | -5.395495 |
| 1NKR | A | ARG | 78  | E | -13.449419 | 14.525813 | -17.788920 | -5.654005 |
| 1NKR | A | CYS | 79  | E | -12.147760 | 12.985859 | -15.701422 | -5.194087 |
| 1NKR | A | TYR | 80  | E | -11.047358 | 13.307936 | -14.012555 | -5.041036 |
| 1NKR | A | GLY | 81  | E | -8.059646  | 7.865021  | -13.166189 | -5.216364 |
| 1NKR | A | SER | 82  | E | -7.571333  | 7.719144  | -12.359625 | -4.767388 |
| 1NKR | A | VAL | 83  | B | -5.591269  | 6.865016  | -8.715585  | -3.986930 |
| 1NKR | A | THR | 84  | T | -4.907975  | 6.595458  | -8.585333  | -4.137678 |
| 1NKR | A | HIS | 85  | T | -4.823658  | 6.416788  | -8.758291  | -4.109484 |
| 1NKR | A | SER | 86  | B | -4.706094  | 6.379756  | -8.768863  | -4.066374 |
| 1NKR | A | PRO | 87  | T | -4.625709  | 6.490119  | -8.767534  | -4.077450 |
| 1NKR | A | TYR | 88  | T | -4.738703  | 6.447500  | -8.841304  | -4.112754 |
| 1NKR | A | GLN | 89  | T | -5.157162  | 6.461956  | -9.203673  | -4.020685 |
| 1NKR | A | VAL | 90  | C | -5.310160  | 6.850237  | -9.008476  | -4.051199 |
| 1NKR | A | SER | 91  | C | -5.730412  | 7.482862  | -9.128162  | -4.214372 |
| 1NKR | A | ALA | 92  | C | -6.796660  | 8.696989  | -10.736409 | -4.505350 |
| 1NKR | A | PRO | 93  | C | -7.345936  | 9.088833  | -11.122031 | -4.461743 |
| 1NKR | A | SER | 94  | C | -7.954520  | 9.316466  | -11.329866 | -4.294772 |
| 1NKR | A | ASP | 95  | C | -8.488256  | 8.729356  | -12.089327 | -4.390209 |
| 1NKR | A | PRO | 96  | C | -8.515753  | 8.758798  | -11.963190 | -4.368353 |
| 1NKR | A | LEU | 97  | E | -10.225323 | 12.179048 | -13.011153 | -4.479286 |
| 1NKR | A | ASP | 98  | E | -10.935695 | 15.225092 | -12.446394 | -4.217976 |
| 1NKR | A | ILE | 99  | E | -8.543885  | 16.468504 | -7.454293  | -3.995873 |
| 1NKR | A | VAL | 100 | E | -7.856967  | 15.702001 | -7.522915  | -4.130794 |
| 1NKR | A | ILE | 101 | E | -7.765975  | 15.730004 | -7.718894  | -4.210965 |
| 1NKR | A | ILE | 102 | E | -7.520797  | 14.965351 | -8.339264  | -4.454849 |
| 1NKR | A | GLY | 103 | C | -7.416330  | 14.428576 | -8.871042  | -4.612967 |
| 1NKR | A | LEU | 104 | C | -7.495556  | 14.070934 | -9.187890  | -4.727666 |
| 1NKR | A | TYR | 105 | C | -7.770231  | 13.302950 | -10.172142 | -5.045831 |
| 1NKR | A | GLU | 106 | C | -7.801456  | 12.721752 | -10.503346 | -5.064478 |
| 1NKR | A | LYS | 107 | C | -8.253616  | 11.801425 | -11.672743 | -5.205042 |
| 1NKR | A | PRO | 108 | C | -8.647141  | 11.805332 | -11.368914 | -4.400980 |
| 1NKR | A | SER | 109 | E | -8.638319  | 11.071425 | -11.530186 | -4.227625 |
| 1NKR | A | LEU | 110 | E | -8.365438  | 10.757994 | -11.190352 | -4.017592 |
| 1NKR | A | SER | 111 | E | -7.066941  | 6.764250  | -10.316097 | -3.641126 |
| 1NKR | A | ALA | 112 | E | -5.968926  | 6.733886  | -8.814609  | -3.498841 |
| 1NKR | A | GLN | 113 | E | -5.482739  | 6.980515  | -8.600573  | -3.663286 |
| 1NKR | A | PRO | 114 | T | -4.964710  | 7.807211  | -7.575517  | -3.593509 |
| 1NKR | A | GLY | 115 | T | -4.950301  | 7.803249  | -7.625308  | -3.595934 |
| 1NKR | A | PRO | 116 | T | -4.962313  | 7.845653  | -7.568843  | -3.593730 |
| 1NKR | A | THR | 117 | E | -5.030544  | 8.012132  | -7.502947  | -3.624182 |
| 1NKR | A | VAL | 118 | E | -5.197068  | 8.275305  | -7.246744  | -3.568427 |
| 1NKR | A | LEU | 119 | T | -5.904109  | 6.523388  | -10.114923 | -3.996517 |
| 1NKR | A | ALA | 120 | T | -5.933067  | 6.522549  | -10.177095 | -4.045011 |
| 1NKR | A | GLY | 121 | T | -5.911962  | 6.686501  | -10.168201 | -4.087820 |
| 1NKR | A | GLU | 122 | E | -6.063118  | 6.508521  | -10.343860 | -4.177086 |
| 1NKR | A | ASN | 123 | E | -6.122670  | 6.458144  | -10.317746 | -4.222269 |
| 1NKR | A | VAL | 124 | E | -7.057244  | 9.285311  | -10.058926 | -4.237144 |
| 1NKR | A | THR | 125 | E | -7.528763  | 10.232820 | -9.894814  | -4.407416 |
| 1NKR | A | LEU | 126 | E | -9.783228  | 13.824086 | -11.223778 | -4.370476 |
| 1NKR | A | SER | 127 | E | -10.763615 | 13.056329 | -13.106234 | -4.552340 |
| 1NKR | A | CYS | 128 | E | -11.388385 | 9.675453  | -16.641480 | -4.985626 |
| 1NKR | A | SER | 129 | E | -10.438357 | 8.975533  | -15.516903 | -4.941072 |
| 1NKR | A | SER | 130 | E | -10.429341 | 9.112521  | -15.498920 | -4.956440 |
| 1NKR | A | ARG | 131 | C | -10.378740 | 9.442312  | -15.378865 | -4.931401 |
| 1NKR | A | SER | 132 | T | -10.373328 | 9.518005  | -15.367364 | -4.937473 |

|      |   |     |     |   |            |           |            |           |
|------|---|-----|-----|---|------------|-----------|------------|-----------|
| 1NKR | A | SER | 133 | T | -10.441733 | 9.721401  | -15.158113 | -4.939766 |
| 1NKR | A | TYR | 134 | T | -11.547726 | 13.536290 | -14.816124 | -5.021725 |
| 1NKR | A | ASP | 135 | C | -11.762064 | 13.416521 | -14.357077 | -4.787671 |
| 1NKR | A | MET | 136 | E | -12.997093 | 15.880302 | -15.467749 | -5.534175 |
| 1NKR | A | TYR | 137 | E | -14.875541 | 19.195240 | -17.290541 | -5.880439 |
| 1NKR | A | HIS | 138 | E | -15.125929 | 17.494211 | -18.830437 | -5.993462 |
| 1NKR | A | LEU | 139 | E | -11.619803 | 11.140698 | -16.172756 | -5.551899 |
| 1NKR | A | SER | 140 | E | -8.957072  | 6.532284  | -14.864681 | -5.314004 |
| 1NKR | A | ARG | 141 | E | -7.385369  | 5.545619  | -12.932344 | -4.926310 |
| 1NKR | A | GLU | 142 | T | -6.465257  | 4.786055  | -12.330160 | -4.886248 |
| 1NKR | A | GLY | 143 | T | -6.191649  | 5.567224  | -12.022127 | -4.962387 |
| 1NKR | A | GLU | 144 | T | -6.191562  | 5.567343  | -12.022756 | -4.962341 |
| 1NKR | A | ALA | 145 | C | -6.197082  | 5.558869  | -11.996332 | -4.959064 |
| 1NKR | A | HIS | 146 | C | -6.276266  | 5.571424  | -11.883355 | -4.967914 |
| 1NKR | A | GLU | 147 | C | -6.780548  | 6.899247  | -11.500440 | -5.091870 |
| 1NKR | A | ARG | 148 | E | -10.985824 | 8.821775  | -16.205683 | -4.895932 |
| 1NKR | A | ARG | 149 | E | -8.990159  | 9.867322  | -12.520479 | -4.599882 |
| 1NKR | A | LEU | 150 | E | -6.724842  | 7.498030  | -11.281412 | -4.805946 |
| 1NKR | A | PRO | 151 | E | -5.116789  | 6.233541  | -7.951704  | -3.562414 |
| 1NKR | A | ALA | 152 | C | -4.461486  | 5.455660  | -7.815854  | -3.548732 |
| 1NKR | A | GLY | 153 | E | -2.697090  | 3.119174  | -6.601340  | -3.687925 |
| 1NKR | A | PRO | 154 | E | -1.880588  | 3.461347  | -6.024651  | -3.884238 |
| 1NKR | A | LYS | 155 | E | -1.746869  | 3.794835  | -6.196920  | -4.036557 |
| 1NKR | A | VAL | 156 | E | -1.748608  | 3.788444  | -6.191803  | -4.037912 |
| 1NKR | A | ASN | 157 | T | -1.753118  | 3.775925  | -6.175394  | -4.038746 |
| 1NKR | A | GLY | 158 | T | -1.891982  | 3.902068  | -5.956969  | -4.045391 |
| 1NKR | A | THR | 159 | E | -2.740803  | 4.846450  | -6.404989  | -4.326126 |
| 1NKR | A | PHE | 160 | E | -6.214048  | 9.072808  | -9.911365  | -5.123970 |
| 1NKR | A | GLN | 161 | E | -8.277956  | 12.262808 | -15.706136 | -8.655921 |
| 1NKR | A | ALA | 162 | E | -9.414950  | 12.914109 | -16.593467 | -8.492118 |
| 1NKR | A | ASP | 163 | E | -9.444379  | 12.603149 | -12.355924 | -5.044440 |
| 1NKR | A | PHE | 164 | E | -9.152972  | 11.868410 | -11.968826 | -4.573078 |
| 1NKR | A | PRO | 165 | E | -7.489127  | 7.540560  | -10.439260 | -3.642304 |
| 1NKR | A | LEU | 166 | E | -6.203878  | 8.137186  | -8.416887  | -3.584306 |
| 1NKR | A | GLY | 167 | E | -5.037633  | 5.746776  | -8.018617  | -3.426838 |
| 1NKR | A | PRO | 168 | E | -4.361513  | 6.313156  | -7.182625  | -3.476135 |
| 1NKR | A | ALA | 169 | E | -4.254865  | 6.189417  | -7.511238  | -3.587546 |
| 1NKR | A | THR | 170 | C | -4.153177  | 6.274662  | -7.746715  | -3.758707 |
| 1NKR | A | HIS | 171 | C | -4.169805  | 6.219836  | -7.735474  | -3.764055 |
| 1NKR | A | GLY | 172 | C | -4.301366  | 6.431798  | -7.678583  | -3.852960 |
| 1NKR | A | GLY | 173 | E | -4.867026  | 6.192776  | -9.093628  | -4.416052 |
| 1NKR | A | THR | 174 | E | -5.235153  | 6.738068  | -9.025343  | -4.645676 |
| 1NKR | A | TYR | 175 | E | -9.237255  | 11.985915 | -12.535852 | -5.502787 |
| 1NKR | A | ARG | 176 | E | -11.749040 | 14.061247 | -15.314788 | -5.765222 |
| 1NKR | A | CYS | 177 | E | -12.880881 | 14.511384 | -17.277656 | -5.886891 |
| 1NKR | A | PHE | 178 | E | -12.632158 | 15.645130 | -15.808373 | -5.580594 |
| 1NKR | A | GLY | 179 | E | -9.408392  | 9.549021  | -13.605206 | -5.118904 |
| 1NKR | A | SER | 180 | E | -8.929556  | 9.835632  | -13.231938 | -5.053365 |
| 1NKR | A | PHE | 181 | E | -7.632418  | 9.203557  | -11.043189 | -4.606927 |
| 1NKR | A | HIS | 182 | T | -7.589338  | 9.200741  | -11.157189 | -4.605134 |
| 1NKR | A | ASP | 183 | T | -7.587456  | 9.206412  | -11.168500 | -4.606877 |
| 1NKR | A | SER | 184 | E | -7.615395  | 9.191165  | -11.051309 | -4.582251 |
| 1NKR | A | PRO | 185 | E | -7.652263  | 9.134949  | -10.930546 | -4.555379 |
| 1NKR | A | TYR | 186 | E | -9.136236  | 9.257580  | -12.763204 | -4.608139 |
| 1NKR | A | GLU | 187 | E | -10.969748 | 11.223919 | -14.745004 | -5.171050 |
| 1NKR | A | TRP | 188 | E | -13.441524 | 15.193993 | -17.180000 | -5.714138 |
| 1NKR | A | SER | 189 | C | -11.397789 | 9.231632  | -16.819852 | -5.422426 |
| 1NKR | A | LYS | 190 | C | -8.785417  | 8.101549  | -13.265056 | -4.908647 |
| 1NKR | A | SER | 191 | C | -8.674953  | 8.250862  | -13.313308 | -4.860955 |
| 1NKR | A | SER | 192 | C | -8.405624  | 8.199510  | -13.078219 | -4.660349 |
| 1NKR | A | ASP | 193 | C | -8.405579  | 8.200483  | -13.078204 | -4.660436 |
| 1NKR | A | PRO | 194 | C | -8.407930  | 8.214869  | -13.054350 | -4.656073 |
| 1NKR | A | LEU | 195 | E | -8.838574  | 8.430722  | -12.863658 | -4.382653 |
| 1NKR | A | LEU | 196 | E | -8.579984  | 9.783277  | -11.097362 | -3.719103 |
| 1NKR | A | VAL | 197 | E | -7.167519  | 10.249378 | -6.954914  | -2.446504 |
| 1NKR | A | SER | 198 | E | -7.167519  | 10.249378 | -6.954914  | -2.446504 |
| 1NKR | A | VAL | 199 | E | -7.167519  | 10.249378 | -6.954914  | -2.446504 |
| 1NKR | A | THR | 200 | C | -7.167519  | 10.249378 | -6.954914  | -2.446504 |
| 1PBK | A | PRO | 109 | C | -7.962991  | 11.095665 | -10.101097 | -4.235216 |
| 1PBK | A | LYS | 110 | C | -7.962991  | 11.095665 | -10.101097 | -4.235216 |
| 1PBK | A | TYR | 111 | E | -7.962991  | 11.095665 | -10.101097 | -4.235216 |
| 1PBK | A | THR | 112 | E | -7.962991  | 11.095665 | -10.101097 | -4.235216 |
| 1PBK | A | LYS | 113 | E | -7.902081  | 10.593165 | -11.434029 | -5.137779 |
| 1PBK | A | SER | 114 | E | -7.694756  | 9.752369  | -11.775579 | -5.048849 |
| 1PBK | A | VAL | 115 | E | -6.328860  | 9.164982  | -10.235479 | -5.154991 |
| 1PBK | A | LEU | 116 | E | -6.323336  | 9.155468  | -10.276143 | -5.159618 |
| 1PBK | A | LYS | 117 | E | -6.300823  | 9.029140  | -10.436885 | -5.170808 |
| 1PBK | A | LYS | 118 | T | -5.708668  | 6.786238  | -11.001444 | -5.173848 |
| 1PBK | A | GLY | 119 | C | -4.288315  | 5.836630  | -9.430210  | -5.227373 |
| 1PBK | A | ASP | 120 | T | -4.217749  | 6.102488  | -9.394858  | -5.233716 |
| 1PBK | A | LYS | 121 | T | -4.213290  | 6.140395  | -9.392738  | -5.229269 |

|      |   |     |     |   |            |           |            |           |
|------|---|-----|-----|---|------------|-----------|------------|-----------|
| 1PBK | A | THR | 122 | T | -4.212730  | 6.147773  | -9.389277  | -5.226897 |
| 1PBK | A | ASN | 123 | T | -4.244640  | 6.175382  | -9.281099  | -5.229420 |
| 1PBK | A | PHE | 124 | C | -5.349708  | 8.525819  | -9.306959  | -5.207102 |
| 1PBK | A | PRO | 125 | C | -6.775344  | 9.791371  | -10.136831 | -4.488976 |
| 1PBK | A | LYS | 126 | T | -7.198619  | 7.685037  | -11.661907 | -4.279515 |
| 1PBK | A | LYS | 127 | T | -7.418396  | 6.839315  | -12.219610 | -4.321380 |
| 1PBK | A | GLY | 128 | T | -7.423842  | 6.800643  | -12.213396 | -4.320598 |
| 1PBK | A | ASP | 129 | T | -7.483766  | 6.541118  | -12.248822 | -4.334996 |
| 1PBK | A | VAL | 130 | E | -8.288704  | 5.955057  | -13.508321 | -4.520364 |
| 1PBK | A | VAL | 131 | E | -10.258499 | 8.524534  | -14.715203 | -4.516627 |
| 1PBK | A | HIS | 132 | E | -12.113930 | 9.682862  | -17.080273 | -4.971842 |
| 1PBK | A | CYS | 133 | E | -13.331350 | 15.764472 | -16.747980 | -5.544189 |
| 1PBK | A | TRP | 134 | E | -12.784178 | 18.933529 | -14.435080 | -5.767678 |
| 1PBK | A | TYR | 135 | E | -12.051500 | 16.932098 | -15.230027 | -6.053112 |
| 1PBK | A | THR | 136 | E | -9.914496  | 11.384255 | -13.727561 | -5.191533 |
| 1PBK | A | GLY | 137 | E | -8.181762  | 8.444426  | -12.546964 | -4.873814 |
| 1PBK | A | THR | 138 | E | -6.619295  | 7.110445  | -11.154116 | -4.807970 |
| 1PBK | A | LEU | 139 | T | -4.439648  | 5.353701  | -8.753984  | -4.497495 |
| 1PBK | A | GLN | 140 | T | -3.486000  | 4.753451  | -8.151536  | -4.495075 |
| 1PBK | A | ASP | 141 | T | -3.477962  | 4.814720  | -8.160163  | -4.496655 |
| 1PBK | A | GLY | 142 | T | -3.477981  | 4.814961  | -8.159848  | -4.496629 |
| 1PBK | A | THR | 143 | C | -3.480284  | 4.809763  | -8.147528  | -4.495212 |
| 1PBK | A | VAL | 144 | E | -3.607992  | 4.684991  | -8.008079  | -4.491759 |
| 1PBK | A | PHE | 145 | E | -5.985655  | 9.398917  | -8.886565  | -4.596601 |
| 1PBK | A | ASP | 146 | E | -7.505692  | 10.860521 | -10.587771 | -4.707890 |
| 1PBK | A | THR | 147 | E | -6.968539  | 8.526595  | -11.074500 | -4.729958 |
| 1PBK | A | ASN | 148 | C | -6.556514  | 6.504272  | -11.372766 | -4.542854 |
| 1PBK | A | ILE | 149 | C | -4.957463  | 5.638818  | -8.568208  | -3.843146 |
| 1PBK | A | GLN | 150 | T | -4.909257  | 5.659169  | -8.740831  | -3.881334 |
| 1PBK | A | THR | 151 | T | -4.833649  | 5.609564  | -8.986834  | -3.939461 |
| 1PBK | A | SER | 152 | T | -4.822219  | 5.538370  | -9.043959  | -3.934202 |
| 1PBK | A | ALA | 153 | T | -4.836714  | 5.530582  | -8.999451  | -3.924693 |
| 1PBK | A | LYS | 154 | T | -5.202358  | 6.220643  | -10.364812 | -4.663126 |
| 1PBK | A | LYS | 155 | T | -5.273548  | 6.281250  | -10.357072 | -4.723653 |
| 1PBK | A | LYS | 156 | T | -5.419851  | 6.648361  | -10.353798 | -4.886393 |
| 1PBK | A | LYS | 157 | T | -5.475521  | 6.912930  | -10.222101 | -4.961087 |
| 1PBK | A | ASN | 158 | T | -5.491979  | 6.938346  | -10.160395 | -4.967789 |
| 1PBK | A | ALA | 159 | T | -6.847095  | 7.660523  | -12.953384 | -5.322660 |
| 1PBK | A | LYS | 160 | T | -7.001648  | 7.923246  | -12.771062 | -5.280882 |
| 1PBK | A | PRO | 161 | C | -7.562749  | 9.284110  | -11.417825 | -4.387218 |
| 1PBK | A | LEU | 162 | E | -8.020727  | 10.221137 | -10.772935 | -4.033585 |
| 1PBK | A | SER | 163 | E | -8.159536  | 10.505209 | -10.511882 | -4.022601 |
| 1PBK | A | PHE | 164 | E | -9.266100  | 13.838356 | -11.110841 | -4.364985 |
| 1PBK | A | LYS | 165 | E | -6.954754  | 8.672804  | -10.239049 | -4.523562 |
| 1PBK | A | VAL | 166 | T | -4.821642  | 8.509546  | -7.474522  | -4.417919 |
| 1PBK | A | GLY | 167 | T | -3.546666  | 7.226418  | -6.689506  | -4.403563 |
| 1PBK | A | VAL | 168 | T | -3.320065  | 8.014714  | -6.215072  | -4.279231 |
| 1PBK | A | GLY | 169 | T | -3.308506  | 8.068630  | -6.230557  | -4.277989 |
| 1PBK | A | LYS | 170 | T | -3.309261  | 8.070833  | -6.224057  | -4.277357 |
| 1PBK | A | VAL | 171 | T | -3.356270  | 8.030421  | -6.123727  | -4.263568 |
| 1PBK | A | ILE | 172 | T | -3.965009  | 9.741070  | -5.278357  | -4.002626 |
| 1PBK | A | ARG | 173 | H | -5.625320  | 10.807761 | -7.043794  | -4.184262 |
| 1PBK | A | GLY | 174 | H | -7.499053  | 12.159443 | -8.653725  | -4.196666 |
| 1PBK | A | TRP | 175 | H | -10.701659 | 16.216071 | -11.158287 | -4.482165 |
| 1PBK | A | ASP | 176 | H | -12.534940 | 16.253489 | -16.387711 | -5.838338 |
| 1PBK | A | GLU | 177 | H | -11.514397 | 12.653763 | -14.568407 | -4.650345 |
| 1PBK | A | ALA | 178 | H | -10.985636 | 13.601141 | -13.483424 | -4.592745 |
| 1PBK | A | LEU | 179 | H | -10.962721 | 13.625640 | -13.539599 | -4.609693 |
| 1PBK | A | LEU | 180 | H | -10.951735 | 13.604610 | -13.615313 | -4.629126 |
| 1PBK | A | THR | 181 | C | -10.934890 | 13.481348 | -13.785180 | -4.685025 |
| 1PBK | A | MET | 182 | C | -11.162271 | 14.049798 | -13.589441 | -4.766715 |
| 1PBK | A | SER | 183 | T | -12.125593 | 12.533960 | -17.411412 | -5.705000 |
| 1PBK | A | LYS | 184 | T | -12.126411 | 11.367698 | -18.457549 | -6.035304 |
| 1PBK | A | GLY | 185 | T | -12.178526 | 11.199093 | -18.640557 | -6.103974 |
| 1PBK | A | GLU | 186 | E | -12.428293 | 11.602653 | -18.716844 | -6.191412 |
| 1PBK | A | LYS | 187 | E | -12.334269 | 12.585062 | -18.051109 | -6.100485 |
| 1PBK | A | ALA | 188 | E | -12.035203 | 14.880793 | -15.599673 | -5.489913 |
| 1PBK | A | ARG | 189 | E | -12.180726 | 16.594979 | -14.547714 | -5.293676 |
| 1PBK | A | LEU | 190 | E | -12.111046 | 16.877439 | -14.341156 | -5.246509 |
| 1PBK | A | GLU | 191 | E | -11.755021 | 15.634981 | -14.916279 | -5.472571 |
| 1PBK | A | ILE | 192 | E | -11.717349 | 15.718773 | -14.847225 | -5.456879 |
| 1PBK | A | GLU | 193 | C | -11.371671 | 15.152641 | -14.649550 | -5.577688 |
| 1PBK | A | PRO | 194 | G | -11.347153 | 15.340754 | -14.575060 | -5.574341 |
| 1PBK | A | GLU | 195 | G | -11.183141 | 15.750321 | -14.411593 | -5.679885 |
| 1PBK | A | TRP | 196 | G | -11.154813 | 15.924567 | -14.189268 | -5.598334 |
| 1PBK | A | ALA | 197 | T | -9.810380  | 10.343117 | -13.892057 | -4.941742 |
| 1PBK | A | TYR | 198 | T | -8.648752  | 8.594742  | -13.563115 | -5.149060 |
| 1PBK | A | GLY | 199 | T | -8.462556  | 7.911678  | -14.035700 | -5.142054 |
| 1PBK | A | LYS | 200 | T | -8.335450  | 7.590034  | -14.243532 | -5.090326 |
| 1PBK | A | LYS | 201 | T | -7.327062  | 5.737961  | -12.980549 | -4.650119 |
| 1PBK | A | GLY | 202 | T | -6.325093  | 5.416348  | -11.608618 | -4.564942 |

|      |   |     |     |   |            |           |            |           |
|------|---|-----|-----|---|------------|-----------|------------|-----------|
| 1PBK | A | GLN | 203 | B | -5.999457  | 5.097271  | -11.456862 | -4.419978 |
| 1PBK | A | PRO | 204 | G | -5.481388  | 6.659772  | -9.569876  | -4.057230 |
| 1PBK | A | ASP | 205 | G | -5.436743  | 6.850935  | -9.519288  | -4.036800 |
| 1PBK | A | ALA | 206 | G | -5.421597  | 7.083649  | -9.340216  | -3.980418 |
| 1PBK | A | LYS | 207 | C | -5.532167  | 7.480696  | -8.926955  | -3.856574 |
| 1PBK | A | ILE | 208 | B | -5.632705  | 8.250896  | -8.362335  | -3.750488 |
| 1PBK | A | PRO | 209 | T | -6.455435  | 9.725397  | -8.792511  | -3.608988 |
| 1PBK | A | PRO | 210 | T | -6.770339  | 10.074730 | -8.657687  | -3.478763 |
| 1PBK | A | ASN | 211 | T | -7.263913  | 10.175893 | -9.214412  | -3.638438 |
| 1PBK | A | ALA | 212 | T | -7.378634  | 10.233351 | -8.982615  | -3.614309 |
| 1PBK | A | LYS | 213 | C | -8.845233  | 10.067398 | -12.120091 | -4.535881 |
| 1PBK | A | LEU | 214 | E | -10.522751 | 12.649016 | -13.589805 | -4.957402 |
| 1PBK | A | THR | 215 | E | -11.781813 | 14.216405 | -14.927529 | -5.529827 |
| 1PBK | A | PHE | 216 | E | -13.601620 | 18.736141 | -15.891613 | -5.546836 |
| 1PBK | A | GLU | 217 | E | -13.729679 | 18.730447 | -15.886053 | -5.559732 |
| 1PBK | A | VAL | 218 | E | -13.649578 | 18.714105 | -16.064094 | -5.694096 |
| 1PBK | A | GLU | 219 | E | -12.523619 | 15.984533 | -15.540599 | -5.848063 |
| 1PBK | A | LEU | 220 | E | -9.667557  | 12.799943 | -11.509686 | -4.497211 |
| 1PBK | A | VAL | 221 | E | -7.100507  | 9.154092  | -9.020719  | -3.636177 |
| 1PBK | A | ASP | 222 | E | -7.100507  | 9.154092  | -9.020719  | -3.636177 |
| 1PBK | A | ILE | 223 | E | -7.100507  | 9.154092  | -9.020719  | -3.636177 |
| 1PBK | A | ASP | 224 | C | -7.100507  | 9.154092  | -9.020719  | -3.636177 |
| 1PBV | A | ALA | 52  | C | -1.992957  | 1.501318  | -7.257937  | -3.866818 |
| 1PBV | A | ASN | 53  | C | -1.992957  | 1.501318  | -7.257937  | -3.866818 |
| 1PBV | A | GLU | 54  | H | -1.992957  | 1.501318  | -7.257937  | -3.866818 |
| 1PBV | A | GLY | 55  | H | -1.992957  | 1.501318  | -7.257937  | -3.866818 |
| 1PBV | A | SER | 56  | H | -2.953770  | 2.488015  | -9.598150  | -4.872462 |
| 1PBV | A | LYS | 57  | H | -3.261833  | 2.823131  | -10.229333 | -5.377491 |
| 1PBV | A | THR | 58  | H | -3.723345  | 3.339236  | -11.034563 | -5.931378 |
| 1PBV | A | LEU | 59  | H | -4.425856  | 3.640046  | -12.274075 | -6.501134 |
| 1PBV | A | GLN | 60  | H | -5.600760  | 5.084002  | -14.335057 | -7.599607 |
| 1PBV | A | ARG | 61  | H | -7.349187  | 7.243267  | -17.614648 | -8.733087 |
| 1PBV | A | ASN | 62  | H | -7.626931  | 7.545667  | -17.940686 | -9.047322 |
| 1PBV | A | ARG | 63  | H | -8.310520  | 8.456541  | -18.284928 | -9.241747 |
| 1PBV | A | LYS | 64  | H | -9.926735  | 10.141650 | -20.351621 | -9.795534 |
| 1PBV | A | MET | 65  | H | -11.143613 | 10.970997 | -16.566596 | -5.512359 |
| 1PBV | A | ALA | 66  | H | -10.317817 | 9.521247  | -15.369468 | -5.101425 |
| 1PBV | A | MET | 67  | H | -10.161582 | 9.963050  | -15.250583 | -5.203466 |
| 1PBV | A | GLY | 68  | H | -10.208410 | 9.931925  | -15.219127 | -5.215416 |
| 1PBV | A | ARG | 69  | H | -10.230033 | 9.854411  | -15.162704 | -5.188370 |
| 1PBV | A | LYS | 70  | H | -9.660112  | 11.350270 | -13.455561 | -5.029932 |
| 1PBV | A | LYS | 71  | H | -9.642230  | 12.386229 | -12.998963 | -5.108285 |
| 1PBV | A | PHE | 72  | H | -9.628200  | 12.521679 | -12.796472 | -5.004661 |
| 1PBV | A | ASN | 73  | H | -9.519689  | 11.859385 | -13.222628 | -5.012291 |
| 1PBV | A | MET | 74  | H | -8.604284  | 8.962306  | -12.872194 | -4.756406 |
| 1PBV | A | ASP | 75  | C | -8.422497  | 8.550069  | -13.047437 | -4.796463 |
| 1PBV | A | PRO | 76  | H | -8.434114  | 8.455972  | -13.048723 | -4.780890 |
| 1PBV | A | LYS | 77  | H | -8.425899  | 8.434712  | -13.105725 | -4.800807 |
| 1PBV | A | LYS | 78  | H | -8.439649  | 8.444720  | -13.051722 | -4.795585 |
| 1PBV | A | GLY | 79  | H | -8.975898  | 8.845130  | -13.457816 | -4.955767 |
| 1PBV | A | ILE | 80  | H | -10.188994 | 11.133951 | -14.556174 | -5.233265 |
| 1PBV | A | GLN | 81  | H | -10.394506 | 10.406997 | -15.010416 | -5.334523 |
| 1PBV | A | PHE | 82  | H | -11.335520 | 13.384391 | -14.907481 | -5.211184 |
| 1PBV | A | LEU | 83  | H | -9.565266  | 9.385797  | -13.504165 | -4.839068 |
| 1PBV | A | VAL | 84  | H | -9.097365  | 9.466719  | -13.515828 | -4.992781 |
| 1PBV | A | GLU | 85  | H | -9.048145  | 9.635316  | -13.562882 | -5.018709 |
| 1PBV | A | ASN | 86  | H | -9.006274  | 9.815593  | -13.596571 | -5.050796 |
| 1PBV | A | GLU | 87  | T | -8.415636  | 11.892243 | -11.747568 | -5.063112 |
| 1PBV | A | LEU | 88  | T | -7.587707  | 13.876721 | -9.132839  | -4.927699 |
| 1PBV | A | LEU | 89  | T | -7.008450  | 12.447194 | -8.734714  | -4.527493 |
| 1PBV | A | GLN | 90  | T | -6.721916  | 10.976107 | -9.411092  | -4.543875 |
| 1PBV | A | ASN | 91  | C | -6.539468  | 10.565931 | -9.777302  | -4.669210 |
| 1PBV | A | THR | 92  | C | -6.534979  | 10.535876 | -9.785243  | -4.658030 |
| 1PBV | A | PRO | 93  | H | -6.618413  | 9.965839  | -9.985732  | -4.623490 |
| 1PBV | A | GLU | 94  | H | -6.853033  | 9.211155  | -10.667199 | -4.777971 |
| 1PBV | A | GLU | 95  | H | -7.240896  | 9.755422  | -10.809533 | -4.967237 |
| 1PBV | A | ILE | 96  | H | -8.446798  | 11.857944 | -10.833191 | -4.625568 |
| 1PBV | A | ALA | 97  | H | -9.602119  | 13.030673 | -11.554475 | -4.458900 |
| 1PBV | A | ARG | 98  | H | -9.838027  | 12.718674 | -11.543793 | -4.438912 |
| 1PBV | A | PHE | 99  | H | -10.874339 | 17.678008 | -11.368480 | -5.167528 |
| 1PBV | A | LEU | 100 | H | -8.876603  | 12.265386 | -11.405917 | -5.074570 |
| 1PBV | A | TYR | 101 | H | -6.703145  | 7.730054  | -11.438870 | -5.360241 |
| 1PBV | A | LYS | 102 | H | -5.420538  | 7.804162  | -9.619001  | -5.122952 |
| 1PBV | A | GLY | 103 | T | -5.328121  | 7.788043  | -9.801604  | -5.145838 |
| 1PBV | A | GLU | 104 | T | -5.327298  | 7.790868  | -9.806741  | -5.146434 |
| 1PBV | A | GLY | 105 | T | -5.326743  | 7.788491  | -9.811086  | -5.146610 |
| 1PBV | A | LEU | 106 | T | -5.385299  | 7.813485  | -9.641864  | -5.122604 |
| 1PBV | A | ASN | 107 | C | -6.447295  | 7.826795  | -10.947445 | -5.272205 |
| 1PBV | A | LYS | 108 | H | -8.239724  | 10.809544 | -12.297256 | -5.054704 |
| 1PBV | A | THR | 109 | H | -7.753527  | 10.162101 | -10.786306 | -4.321495 |
| 1PBV | A | ALA | 110 | H | -7.886234  | 10.164616 | -10.417708 | -4.114419 |

|      |   |     |     |   |            |           |            |           |
|------|---|-----|-----|---|------------|-----------|------------|-----------|
| 1PBV | A | ILE | 111 | H | -7.951257  | 9.948951  | -10.285488 | -4.038721 |
| 1PBV | A | GLY | 112 | H | -7.981633  | 9.867371  | -10.192240 | -4.013889 |
| 1PBV | A | ASP | 113 | H | -8.008729  | 9.751878  | -10.123941 | -3.994217 |
| 1PBV | A | TYR | 114 | H | -11.400014 | 15.330568 | -13.845678 | -5.018227 |
| 1PBV | A | LEU | 115 | H | -10.612695 | 11.360529 | -14.463065 | -5.055224 |
| 1PBV | A | GLY | 116 | H | -8.450071  | 6.444227  | -13.818312 | -4.929935 |
| 1PBV | A | GLU | 117 | C | -8.046023  | 7.012413  | -13.206158 | -4.729823 |
| 1PBV | A | ARG | 118 | C | -7.299779  | 7.137036  | -11.680449 | -4.352110 |
| 1PBV | A | GLU | 119 | C | -7.292995  | 7.154097  | -11.708231 | -4.356403 |
| 1PBV | A | GLU | 120 | H | -7.288796  | 7.164125  | -11.715873 | -4.353188 |
| 1PBV | A | LEU | 121 | H | -7.376211  | 7.298737  | -11.384663 | -4.261885 |
| 1PBV | A | ASN | 122 | H | -7.479503  | 7.239379  | -11.156241 | -4.211232 |
| 1PBV | A | LEU | 123 | H | -9.486848  | 9.314717  | -13.516356 | -4.375116 |
| 1PBV | A | ALA | 124 | H | -9.639712  | 10.697975 | -12.328260 | -3.851381 |
| 1PBV | A | VAL | 125 | H | -10.084510 | 12.510360 | -11.220587 | -3.418436 |
| 1PBV | A | LEU | 126 | H | -10.083626 | 12.608097 | -11.169138 | -3.416583 |
| 1PBV | A | HIS | 127 | H | -10.012910 | 12.736448 | -11.307589 | -3.510608 |
| 1PBV | A | ALA | 128 | H | -10.189342 | 13.028301 | -11.206791 | -3.559497 |
| 1PBV | A | PHE | 129 | H | -11.054288 | 14.695520 | -12.548488 | -4.260294 |
| 1PBV | A | VAL | 130 | H | -11.009590 | 14.220375 | -12.996956 | -4.399218 |
| 1PBV | A | ASP | 131 | H | -11.055594 | 13.895794 | -13.175548 | -4.454823 |
| 1PBV | A | LEU | 132 | H | -11.515840 | 14.286586 | -14.745857 | -5.142563 |
| 1PBV | A | HIS | 133 | C | -10.310312 | 10.807831 | -14.344772 | -5.154229 |
| 1PBV | A | GLU | 134 | C | -8.586558  | 9.940399  | -11.864508 | -4.720926 |
| 1PBV | A | PHE | 135 | T | -8.526375  | 10.062995 | -11.985838 | -4.756405 |
| 1PBV | A | THR | 136 | T | -8.395057  | 10.035212 | -12.212837 | -4.803657 |
| 1PBV | A | ASP | 137 | T | -8.389183  | 10.063425 | -12.222117 | -4.803515 |
| 1PBV | A | LEU | 138 | T | -8.408680  | 10.056184 | -12.154770 | -4.791116 |
| 1PBV | A | ASN | 139 | C | -9.058670  | 10.789953 | -13.026133 | -4.969859 |
| 1PBV | A | LEU | 140 | H | -9.197634  | 10.865869 | -12.904673 | -4.903174 |
| 1PBV | A | VAL | 141 | H | -10.070738 | 14.029276 | -12.144054 | -4.594664 |
| 1PBV | A | GLN | 142 | H | -10.205263 | 14.263604 | -11.813108 | -4.519890 |
| 1PBV | A | ALA | 143 | H | -10.242065 | 14.336717 | -11.659337 | -4.508809 |
| 1PBV | A | LEU | 144 | H | -11.080386 | 15.841300 | -11.216374 | -4.255062 |
| 1PBV | A | ARG | 145 | H | -14.144509 | 14.228995 | -17.211879 | -4.909066 |
| 1PBV | A | GLN | 146 | H | -15.410050 | 14.569959 | -19.677197 | -5.449000 |
| 1PBV | A | PHE | 147 | H | -15.225469 | 22.175416 | -15.307529 | -5.439208 |
| 1PBV | A | LEU | 148 | H | -15.202023 | 22.307479 | -15.260082 | -5.432686 |
| 1PBV | A | TRP | 149 | H | -14.090539 | 19.977018 | -14.494509 | -5.177090 |
| 1PBV | A | SER | 150 | H | -12.095275 | 18.522873 | -11.469201 | -4.454895 |
| 1PBV | A | PHE | 151 | C | -9.212983  | 16.292642 | -8.846483  | -4.383811 |
| 1PBV | A | ARG | 152 | C | -6.849344  | 11.898511 | -8.336863  | -4.538176 |
| 1PBV | A | LEU | 153 | C | -5.792517  | 10.140529 | -7.981602  | -4.426350 |
| 1PBV | A | PRO | 154 | C | -5.266152  | 7.746922  | -8.839111  | -4.411618 |
| 1PBV | A | GLY | 155 | C | -5.234836  | 7.620259  | -9.021187  | -4.439270 |
| 1PBV | A | GLU | 156 | C | -5.235330  | 7.609952  | -9.023479  | -4.439448 |
| 1PBV | A | ALA | 157 | H | -5.274750  | 7.320351  | -9.071528  | -4.432393 |
| 1PBV | A | GLN | 158 | H | -5.527492  | 6.008407  | -9.688729  | -4.447249 |
| 1PBV | A | LYS | 159 | H | -6.987813  | 5.308395  | -12.391753 | -4.946016 |
| 1PBV | A | ILE | 160 | H | -9.857539  | 8.025819  | -14.742798 | -4.770189 |
| 1PBV | A | ASP | 161 | H | -11.263760 | 8.662098  | -16.439340 | -5.047856 |
| 1PBV | A | ARG | 162 | H | -13.607768 | 13.737527 | -19.524658 | -6.507848 |
| 1PBV | A | MET | 163 | H | -14.029239 | 17.390430 | -17.666213 | -6.100346 |
| 1PBV | A | MET | 164 | H | -12.637354 | 16.723201 | -14.012583 | -5.034171 |
| 1PBV | A | GLU | 165 | H | -12.174816 | 14.645188 | -14.536866 | -4.778891 |
| 1PBV | A | ALA | 166 | H | -12.174352 | 14.647219 | -14.536242 | -4.777171 |
| 1PBV | A | PHE | 167 | H | -12.178731 | 14.635760 | -14.507563 | -4.768567 |
| 1PBV | A | ALA | 168 | H | -12.192385 | 14.547371 | -14.476755 | -4.749804 |
| 1PBV | A | GLN | 169 | H | -12.529037 | 12.932342 | -15.035769 | -4.577579 |
| 1PBV | A | ARG | 170 | H | -15.159513 | 13.196844 | -19.978137 | -5.258426 |
| 1PBV | A | TYR | 171 | H | -14.539303 | 11.224406 | -20.221273 | -5.453557 |
| 1PBV | A | CYS | 172 | H | -11.441821 | 4.543964  | -18.342729 | -4.735758 |
| 1PBV | A | LEU | 173 | H | -9.779007  | 3.695199  | -16.564809 | -4.612915 |
| 1PBV | A | CYS | 174 | H | -9.381787  | 4.281761  | -16.184463 | -4.616509 |
| 1PBV | A | ASN | 175 | T | -8.983312  | 6.930624  | -14.460409 | -4.588798 |
| 1PBV | A | PRO | 176 | T | -7.595752  | 9.826042  | -10.549344 | -4.460886 |
| 1PBV | A | GLY | 177 | T | -7.575309  | 9.885805  | -10.616071 | -4.482091 |
| 1PBV | A | VAL | 178 | T | -7.588728  | 10.032941 | -10.481874 | -4.479554 |
| 1PBV | A | PHE | 179 | T | -7.601849  | 10.161593 | -10.361500 | -4.477939 |
| 1PBV | A | GLN | 180 | T | -7.598657  | 10.122372 | -10.437408 | -4.515461 |
| 1PBV | A | SER | 181 | T | -8.759879  | 9.780774  | -13.592900 | -5.227665 |
| 1PBV | A | THR | 182 | H | -8.934971  | 9.271999  | -13.901371 | -5.286058 |
| 1PBV | A | ASP | 183 | H | -8.931133  | 9.278884  | -13.910201 | -5.283882 |
| 1PBV | A | THR | 184 | H | -8.940880  | 9.231062  | -13.893339 | -5.280479 |
| 1PBV | A | CYS | 185 | H | -9.359889  | 9.479760  | -13.919684 | -5.297107 |
| 1PBV | A | TYR | 186 | H | -11.270229 | 12.566384 | -15.339108 | -5.306019 |
| 1PBV | A | VAL | 187 | H | -11.381156 | 13.127005 | -14.666800 | -4.928633 |
| 1PBV | A | LEU | 188 | H | -11.851320 | 16.213806 | -13.475695 | -4.608279 |
| 1PBV | A | SER | 189 | H | -11.684770 | 16.238638 | -13.068146 | -4.454278 |
| 1PBV | A | PHE | 190 | H | -10.424326 | 14.764734 | -10.794335 | -3.875570 |
| 1PBV | A | ALA | 191 | H | -10.106685 | 14.975442 | -10.624232 | -3.843113 |



|      |   |     |     |   |            |           |            |           |
|------|---|-----|-----|---|------------|-----------|------------|-----------|
| 1PBV | A | VAL | 192 | H | -10.079254 | 15.003145 | -10.676638 | -3.865197 |
| 1PBV | A | ILE | 193 | H | -9.720732  | 14.053207 | -11.220368 | -4.157021 |
| 1PBV | A | MET | 194 | H | -9.619611  | 13.742822 | -11.526957 | -4.249437 |
| 1PBV | A | LEU | 195 | H | -9.762129  | 13.530947 | -11.860622 | -4.391798 |
| 1PBV | A | ASN | 196 | H | -9.896424  | 13.013549 | -12.457198 | -4.630136 |
| 1PBV | A | THR | 197 | H | -9.463756  | 12.817625 | -14.139322 | -6.090806 |
| 1PBV | A | SER | 198 | H | -8.884419  | 12.309104 | -15.014399 | -7.282119 |
| 1PBV | A | LEU | 199 | H | -6.668072  | 9.116760  | -9.839065  | -4.720516 |
| 1PBV | A | HIS | 200 | H | -5.714420  | 6.978545  | -10.076821 | -4.643452 |
| 1PBV | A | ASN | 201 | T | -3.597167  | 3.774691  | -7.069956  | -3.433848 |
| 1PBV | A | PRO | 202 | T | -2.228039  | 3.013929  | -5.433942  | -3.112886 |
| 1PBV | A | ASN | 203 | T | -2.201647  | 3.065714  | -5.529846  | -3.134886 |
| 1PBV | A | VAL | 204 | T | -2.200177  | 3.073683  | -5.535786  | -3.135374 |
| 1PBV | A | ARG | 205 | T | -2.192744  | 3.106698  | -5.564419  | -3.145308 |
| 1PBV | A | ASP | 206 | T | -2.251640  | 3.035090  | -5.393269  | -3.105669 |
| 1PBV | A | LYS | 207 | T | -3.878200  | 4.626210  | -7.586612  | -3.597544 |
| 1PBV | A | PRO | 208 | C | -4.601127  | 5.963312  | -8.049728  | -3.879083 |
| 1PBV | A | GLY | 209 | C | -4.708426  | 5.825257  | -8.052054  | -3.964167 |
| 1PBV | A | LEU | 210 | H | -6.921528  | 10.687358 | -12.023373 | -6.199058 |
| 1PBV | A | GLU | 211 | H | -7.966360  | 9.916280  | -11.299071 | -4.514125 |
| 1PBV | A | ARG | 212 | H | -8.076644  | 9.652692  | -10.670603 | -4.094611 |
| 1PBV | A | PHE | 213 | H | -9.699706  | 13.611777 | -11.254070 | -4.388387 |
| 1PBV | A | VAL | 214 | H | -10.599929 | 12.978412 | -12.955199 | -4.182983 |
| 1PBV | A | ALA | 215 | H | -10.392873 | 10.760675 | -14.231068 | -4.445236 |
| 1PBV | A | MET | 216 | H | -10.300303 | 10.447562 | -14.611734 | -4.597524 |
| 1PBV | A | ASN | 217 | T | -10.524748 | 9.140791  | -16.337007 | -5.193354 |
| 1PBV | A | ARG | 218 | T | -9.811629  | 11.079834 | -16.492170 | -6.808518 |
| 1PBV | A | GLY | 219 | T | -6.428047  | 7.093890  | -10.960735 | -5.105264 |
| 1PBV | A | ILE | 220 | T | -5.805141  | 7.219328  | -10.498368 | -5.069823 |
| 1PBV | A | ASN | 221 | B | -5.407107  | 6.011627  | -11.184747 | -5.252542 |
| 1PBV | A | GLU | 222 | T | -5.314593  | 6.325142  | -11.101362 | -5.248331 |
| 1PBV | A | GLY | 223 | T | -5.261311  | 6.381826  | -11.049168 | -5.180212 |
| 1PBV | A | GLY | 224 | B | -5.336007  | 6.329795  | -11.068504 | -5.183238 |
| 1PBV | A | ASP | 225 | C | -5.534644  | 5.974017  | -11.407601 | -5.229258 |
| 1PBV | A | LEU | 226 | C | -6.075076  | 7.941211  | -10.635597 | -4.888503 |
| 1PBV | A | PRO | 227 | C | -6.493000  | 7.819056  | -10.647229 | -4.516044 |
| 1PBV | A | GLU | 228 | H | -7.184352  | 9.660767  | -10.943248 | -4.624865 |
| 1PBV | A | GLU | 229 | H | -7.629303  | 10.575471 | -10.689340 | -4.454546 |
| 1PBV | A | LEU | 230 | H | -8.014343  | 11.906142 | -10.153247 | -4.333598 |
| 1PBV | A | LEU | 231 | H | -8.490845  | 12.182006 | -10.143541 | -4.276459 |
| 1PBV | A | ARG | 232 | H | -10.012557 | 14.020063 | -11.499537 | -4.312743 |
| 1PBV | A | ASN | 233 | H | -10.480045 | 13.719751 | -11.914254 | -4.353630 |
| 1PBV | A | LEU | 234 | H | -12.060561 | 16.957225 | -13.153280 | -4.733425 |
| 1PBV | A | TYR | 235 | H | -12.785996 | 15.405907 | -15.555149 | -5.150688 |
| 1PBV | A | ASP | 236 | H | -10.314165 | 8.998187  | -14.453654 | -4.626908 |
| 1PBV | A | SER | 237 | H | -9.516514  | 9.396609  | -13.655834 | -4.687338 |
| 1PBV | A | ILE | 238 | H | -7.950491  | 9.241490  | -10.801110 | -4.195565 |
| 1PBV | A | ARG | 239 | H | -7.949035  | 9.264471  | -10.808948 | -4.202819 |
| 1PBV | A | ASN | 240 | H | -7.933645  | 9.454761  | -10.849724 | -4.262279 |
| 1PBV | A | GLU | 241 | C | -7.877167  | 10.181061 | -10.736719 | -4.391373 |
| 1PBV | A | PRO | 242 | C | -7.015586  | 14.174982 | -7.459638  | -4.311436 |
| 1PBV | A | PHE | 243 | C | -6.108614  | 13.837540 | -5.436170  | -3.630109 |
| 1PBV | A | LYS | 244 | C | -6.108614  | 13.837540 | -5.436170  | -3.630109 |
| 1PBV | A | ILE | 245 | C | -6.108614  | 13.837540 | -5.436170  | -3.630109 |
| 1PBV | A | PRO | 246 | C | -6.108614  | 13.837540 | -5.436170  | -3.630109 |
| 1PHT | A | ALA | 3   | C | -8.921571  | 10.746672 | -12.718808 | -5.593618 |
| 1PHT | A | GLU | 4   | E | -8.921571  | 10.746672 | -12.718808 | -5.593618 |
| 1PHT | A | GLY | 5   | E | -8.921571  | 10.746672 | -12.718808 | -5.593618 |
| 1PHT | A | TYR | 6   | E | -8.921571  | 10.746672 | -12.718808 | -5.593618 |
| 1PHT | A | GLN | 7   | E | -13.541649 | 13.174687 | -18.691033 | -6.473544 |
| 1PHT | A | TYR | 8   | E | -14.315378 | 16.194862 | -14.814972 | -4.012725 |
| 1PHT | A | ARG | 9   | E | -11.592190 | 11.306378 | -12.913809 | -3.529016 |
| 1PHT | A | ALA | 10  | E | -11.527950 | 11.510106 | -12.992652 | -3.542820 |
| 1PHT | A | LEU | 11  | C | -10.488347 | 11.734954 | -12.307219 | -3.910086 |
| 1PHT | A | TYR | 12  | C | -10.431478 | 11.847846 | -12.583038 | -4.041633 |
| 1PHT | A | ASP | 13  | C | -9.529234  | 9.357568  | -12.546940 | -4.092219 |
| 1PHT | A | TYR | 14  | B | -8.656654  | 8.103348  | -11.331720 | -3.557680 |
| 1PHT | A | LYS | 15  | C | -5.307446  | 3.636844  | -8.267962  | -3.082927 |
| 1PHT | A | LYS | 16  | T | -5.042291  | 3.571346  | -8.710054  | -3.222914 |
| 1PHT | A | GLU | 17  | T | -4.658266  | 3.970507  | -9.072241  | -3.669669 |
| 1PHT | A | ARG | 18  | T | -4.656441  | 3.979052  | -9.075091  | -3.667905 |
| 1PHT | A | GLU | 19  | T | -4.656898  | 3.976238  | -9.073900  | -3.668217 |
| 1PHT | A | GLU | 20  | T | -4.896420  | 4.152142  | -9.478414  | -3.959651 |
| 1PHT | A | ASP | 21  | B | -5.092829  | 4.425014  | -9.471794  | -4.151413 |
| 1PHT | A | ILE | 22  | C | -8.017052  | 6.969922  | -10.295412 | -3.209191 |
| 1PHT | A | ASP | 23  | C | -9.437062  | 8.583744  | -12.895829 | -4.004218 |
| 1PHT | A | LEU | 24  | B | -9.230384  | 8.927182  | -12.149763 | -3.850389 |
| 1PHT | A | HIS | 25  | T | -8.621486  | 7.866016  | -11.986028 | -3.846461 |
| 1PHT | A | LEU | 26  | T | -8.519612  | 8.122359  | -11.996370 | -3.865893 |
| 1PHT | A | GLY | 27  | T | -8.514896  | 8.151809  | -12.020769 | -3.884145 |
| 1PHT | A | ASP | 28  | E | -8.579077  | 8.164461  | -11.957971 | -3.901389 |

|      |   |     |    |   |            |           |            |           |
|------|---|-----|----|---|------------|-----------|------------|-----------|
| 1PHT | A | ILE | 29 | E | -8.709437  | 7.952551  | -12.013354 | -3.915976 |
| 1PHT | A | LEU | 30 | E | -9.526079  | 9.888760  | -12.298903 | -4.086814 |
| 1PHT | A | THR | 31 | E | -10.249841 | 10.489734 | -14.135490 | -4.664653 |
| 1PHT | A | VAL | 32 | E | -9.951262  | 8.829393  | -14.718958 | -4.700338 |
| 1PHT | A | ASN | 33 | E | -9.771633  | 8.871142  | -14.514529 | -4.621501 |
| 1PHT | A | LYS | 34 | H | -9.594692  | 8.407765  | -14.285871 | -4.393356 |
| 1PHT | A | GLY | 35 | H | -8.598509  | 6.380841  | -11.987902 | -3.318877 |
| 1PHT | A | SER | 36 | H | -8.532728  | 6.508823  | -11.895578 | -3.239155 |
| 1PHT | A | LEU | 37 | H | -6.644975  | 7.509666  | -9.293953  | -3.642906 |
| 1PHT | A | VAL | 38 | H | -6.370710  | 7.146712  | -9.041385  | -3.374294 |
| 1PHT | A | ALA | 39 | H | -6.352027  | 7.116459  | -9.093440  | -3.363988 |
| 1PHT | A | LEU | 40 | C | -6.346180  | 7.110568  | -9.122005  | -3.375006 |
| 1PHT | A | GLY | 41 | T | -6.261719  | 6.899386  | -9.478446  | -3.505951 |
| 1PHT | A | PHE | 42 | T | -6.671646  | 6.250572  | -9.802736  | -3.361385 |
| 1PHT | A | SER | 43 | T | -7.235251  | 5.784134  | -11.736701 | -4.075816 |
| 1PHT | A | ASP | 44 | T | -7.323002  | 5.715038  | -11.911830 | -4.247646 |
| 1PHT | A | GLY | 45 | T | -7.416169  | 5.644635  | -11.956963 | -4.363439 |
| 1PHT | A | GLN | 46 | G | -9.226659  | 7.119916  | -15.028250 | -5.018290 |
| 1PHT | A | GLU | 47 | G | -9.728567  | 5.718302  | -15.481563 | -4.668938 |
| 1PHT | A | ALA | 48 | G | -9.600990  | 7.649302  | -12.995507 | -3.702996 |
| 1PHT | A | ARG | 49 | C | -9.712250  | 8.653938  | -11.909857 | -3.255915 |
| 1PHT | A | PRO | 50 | H | -8.332948  | 10.365920 | -9.611019  | -3.649108 |
| 1PHT | A | GLU | 51 | H | -7.785780  | 11.185816 | -9.587964  | -4.147087 |
| 1PHT | A | GLU | 52 | H | -7.694280  | 11.662346 | -9.620840  | -4.244178 |
| 1PHT | A | ILE | 53 | H | -7.704023  | 11.776613 | -9.570792  | -4.267942 |
| 1PHT | A | GLY | 54 | C | -7.693416  | 11.744722 | -9.616773  | -4.269513 |
| 1PHT | A | TRP | 55 | E | -7.910625  | 12.275087 | -9.726149  | -4.525076 |
| 1PHT | A | LEU | 56 | E | -8.718577  | 13.873573 | -10.172932 | -4.670536 |
| 1PHT | A | ASN | 57 | E | -9.696908  | 11.201896 | -11.610617 | -4.021001 |
| 1PHT | A | GLY | 58 | E | -9.923130  | 10.275183 | -12.108943 | -4.133527 |
| 1PHT | A | TYR | 59 | E | -11.579990 | 9.476924  | -16.090372 | -4.812344 |
| 1PHT | A | ASN | 60 | E | -8.371311  | 6.246277  | -12.996280 | -4.739224 |
| 1PHT | A | GLU | 61 | T | -6.361933  | 6.275878  | -10.661960 | -4.728062 |
| 1PHT | A | THR | 62 | T | -6.132238  | 6.624658  | -10.771514 | -4.767599 |
| 1PHT | A | THR | 63 | T | -6.034288  | 6.477654  | -10.759789 | -4.647458 |
| 1PHT | A | GLY | 64 | T | -6.033381  | 6.476293  | -10.765264 | -4.646709 |
| 1PHT | A | GLU | 65 | E | -6.044895  | 6.481074  | -10.721756 | -4.644891 |
| 1PHT | A | ARG | 66 | E | -6.539321  | 6.747114  | -10.905344 | -4.536772 |
| 1PHT | A | GLY | 67 | E | -7.137629  | 5.722866  | -10.743767 | -3.986988 |
| 1PHT | A | ASP | 68 | E | -9.391749  | 9.557592  | -12.898443 | -4.267498 |
| 1PHT | A | PHE | 69 | E | -9.135356  | 14.321910 | -9.131989  | -3.702194 |
| 1PHT | A | PRO | 70 | E | -7.105845  | 12.404853 | -5.922218  | -2.959309 |
| 1PHT | A | GLY | 71 | T | -7.078970  | 12.406488 | -6.083210  | -3.001837 |
| 1PHT | A | THR | 72 | T | -7.081900  | 12.418602 | -6.049556  | -2.994158 |
| 1PHT | A | TYR | 73 | T | -7.083287  | 12.420760 | -6.038321  | -2.993268 |
| 1PHT | A | VAL | 74 | E | -7.080662  | 12.350726 | -6.097613  | -3.004118 |
| 1PHT | A | GLU | 75 | E | -8.457257  | 12.019308 | -10.056475 | -3.965089 |
| 1PHT | A | TYR | 76 | E | -8.658813  | 11.883061 | -11.205101 | -4.543156 |
| 1PHT | A | ILE | 77 | E | -7.268044  | 8.654736  | -12.339578 | -5.874206 |
| 1PHT | A | GLY | 78 | E | -6.787322  | 7.170602  | -12.416336 | -5.673302 |
| 1PHT | A | ARG | 79 | E | -5.744412  | 6.033822  | -10.084884 | -4.694641 |
| 1PHT | A | LYS | 80 | E | -3.834319  | 3.968334  | -6.956353  | -3.580098 |
| 1PHT | A | LYS | 81 | E | -1.708697  | 2.874129  | -3.365705  | -2.404647 |
| 1PHT | A | ILE | 82 | C | -0.083679  | 2.915359  | -1.938591  | -2.396322 |
| 1PHT | A | SER | 83 | C | -0.083679  | 2.915359  | -1.938591  | -2.396322 |
| 1PHT | A | PRO | 84 | C | -0.083679  | 2.915359  | -1.938591  | -2.396322 |
| 1PHT | A | PRO | 85 | C | -0.083679  | 2.915359  | -1.938591  | -2.396322 |
| 1POD | A | ASN | 1  | C | -10.844491 | 7.191097  | -15.655771 | -4.347284 |
| 1POD | A | LEU | 2  | H | -10.844491 | 7.191097  | -15.655771 | -4.347284 |
| 1POD | A | VAL | 3  | H | -10.844491 | 7.191097  | -15.655771 | -4.347284 |
| 1POD | A | ASN | 4  | H | -10.844491 | 7.191097  | -15.655771 | -4.347284 |
| 1POD | A | PHE | 5  | H | -13.305492 | 17.548359 | -14.765196 | -5.019837 |
| 1POD | A | HIS | 6  | H | -13.080461 | 16.609168 | -14.947628 | -4.893718 |
| 1POD | A | ARG | 7  | H | -12.727427 | 14.997128 | -15.307155 | -4.745258 |
| 1POD | A | MET | 8  | H | -12.506636 | 14.924742 | -15.420569 | -4.876529 |
| 1POD | A | ILE | 9  | H | -11.924401 | 14.084119 | -15.049105 | -4.933290 |
| 1POD | A | LYS | 10 | H | -9.888704  | 9.649713  | -14.379394 | -5.238677 |
| 1POD | A | LEU | 11 | H | -9.594011  | 10.493212 | -14.403734 | -5.513711 |
| 1POD | A | THR | 12 | H | -8.900591  | 9.884804  | -14.397080 | -5.933921 |
| 1POD | A | THR | 13 | H | -8.182315  | 9.083210  | -13.690242 | -5.776569 |
| 1POD | A | GLY | 14 | C | -7.948583  | 8.498096  | -13.736254 | -5.597492 |
| 1POD | A | LYS | 15 | C | -7.928156  | 8.430916  | -13.731365 | -5.551483 |
| 1POD | A | GLU | 16 | C | -7.841624  | 8.189918  | -13.613514 | -5.339203 |
| 1POD | A | ALA | 17 | H | -7.914184  | 8.005488  | -13.511903 | -5.236748 |
| 1POD | A | ALA | 18 | H | -8.264184  | 7.414111  | -13.612224 | -4.854712 |
| 1POD | A | LEU | 19 | H | -8.745889  | 7.555023  | -13.335204 | -4.388065 |
| 1POD | A | SER | 20 | H | -8.936994  | 7.365065  | -13.089068 | -4.248347 |
| 1POD | A | TYR | 21 | H | -11.843914 | 12.319254 | -15.643597 | -4.913057 |
| 1POD | A | GLY | 22 | H | -11.508855 | 11.729460 | -15.859134 | -5.213446 |
| 1POD | A | PHE | 23 | C | -11.770116 | 11.721720 | -15.994755 | -5.345937 |
| 1POD | A | TYR | 24 | C | -11.776866 | 11.696928 | -16.024834 | -5.372966 |

|      |   |     |     |   |            |           |            |           |
|------|---|-----|-----|---|------------|-----------|------------|-----------|
| 1POD | A | GLY | 25  | T | -10.729054 | 7.470860  | -17.215096 | -5.504875 |
| 1POD | A | CYS | 26  | T | -9.766316  | 6.821726  | -16.148354 | -5.274474 |
| 1POD | A | HIS | 27  | T | -6.914549  | 5.421901  | -12.308356 | -4.962491 |
| 1POD | A | CYS | 28  | T | -4.076874  | 2.731928  | -9.835191  | -4.776473 |
| 1POD | A | GLY | 29  | C | -4.050719  | 2.753755  | -9.914943  | -4.768140 |
| 1POD | A | VAL | 30  | C | -4.042412  | 2.782547  | -9.942759  | -4.767614 |
| 1POD | A | GLY | 31  | C | -4.042412  | 2.782491  | -9.942775  | -4.767603 |
| 1POD | A | GLY | 32  | C | -4.047022  | 2.762067  | -9.924456  | -4.765995 |
| 1POD | A | ARG | 33  | C | -5.744878  | 3.629071  | -11.725951 | -4.610319 |
| 1POD | A | GLY | 34  | C | -6.570420  | 4.840116  | -11.924428 | -4.721902 |
| 1POD | A | SER | 35  | C | -9.202012  | 7.954127  | -14.901786 | -4.869766 |
| 1POD | A | PRO | 36  | C | -9.139869  | 10.071401 | -13.863990 | -5.025834 |
| 1POD | A | LYS | 37  | C | -9.330814  | 10.705316 | -13.882604 | -5.244343 |
| 1POD | A | ASP | 38  | C | -9.334396  | 10.706380 | -13.868240 | -5.245357 |
| 1POD | A | ALA | 39  | H | -9.425488  | 10.932854 | -13.577524 | -5.210151 |
| 1POD | A | THR | 40  | H | -9.700303  | 11.786474 | -13.275773 | -5.384738 |
| 1POD | A | ASP | 41  | H | -11.775232 | 9.893440  | -17.643777 | -5.539432 |
| 1POD | A | ARG | 42  | H | -11.009902 | 7.783770  | -15.884948 | -4.416800 |
| 1POD | A | CYS | 43  | H | -10.808246 | 8.142398  | -15.938895 | -4.570529 |
| 1POD | A | CYS | 44  | H | -10.774138 | 8.164742  | -15.999873 | -4.583363 |
| 1POD | A | VAL | 45  | H | -10.733236 | 8.224146  | -16.088668 | -4.608383 |
| 1POD | A | THR | 46  | H | -10.720414 | 8.224615  | -16.171360 | -4.638797 |
| 1POD | A | HIS | 47  | H | -11.212251 | 8.972835  | -16.826643 | -4.996668 |
| 1POD | A | ASP | 48  | H | -11.795289 | 8.892797  | -17.798791 | -5.085720 |
| 1POD | A | CYS | 49  | H | -12.118615 | 8.935072  | -18.135684 | -5.233662 |
| 1POD | A | CYS | 50  | H | -12.873686 | 8.552514  | -19.936871 | -5.893274 |
| 1POD | A | TYR | 51  | H | -15.222807 | 13.197549 | -23.147672 | -7.108989 |
| 1POD | A | LYS | 52  | H | -12.140998 | 9.397377  | -17.921156 | -5.571539 |
| 1POD | A | ARG | 53  | H | -11.030994 | 8.244786  | -16.177676 | -4.724873 |
| 1POD | A | LEU | 54  | H | -8.649069  | 7.040284  | -13.671752 | -4.886148 |
| 1POD | A | GLU | 55  | H | -6.890008  | 4.164626  | -13.090120 | -4.963822 |
| 1POD | A | LYS | 56  | H | -6.415632  | 4.123822  | -13.050881 | -5.007078 |
| 1POD | A | ARG | 57  | H | -6.233415  | 4.497766  | -12.878626 | -5.006507 |
| 1POD | A | GLY | 58  | C | -6.121124  | 5.254109  | -12.650378 | -5.104093 |
| 1POD | A | CYS | 59  | C | -5.967281  | 6.206624  | -12.147147 | -5.159797 |
| 1POD | A | GLY | 60  | T | -5.594805  | 9.084950  | -9.783134  | -5.075155 |
| 1POD | A | THR | 61  | T | -5.672465  | 9.919486  | -9.287925  | -5.080095 |
| 1POD | A | LYS | 62  | T | -5.736600  | 10.421707 | -8.932153  | -5.088682 |
| 1POD | A | PHE | 63  | T | -5.792679  | 10.575015 | -8.671192  | -5.040818 |
| 1POD | A | LEU | 64  | T | -5.908983  | 10.848659 | -8.254835  | -4.978648 |
| 1POD | A | SER | 65  | C | -8.075673  | 11.993334 | -10.610523 | -5.070162 |
| 1POD | A | TYR | 66  | C | -10.711452 | 13.287790 | -14.163653 | -5.394259 |
| 1POD | A | LYS | 67  | C | -10.906478 | 10.959860 | -15.614395 | -5.266781 |
| 1POD | A | PHE | 68  | E | -8.886888  | 8.212972  | -13.295097 | -4.836984 |
| 1POD | A | SER | 69  | E | -8.446451  | 6.028562  | -14.054317 | -4.597811 |
| 1POD | A | ASN | 70  | E | -7.362409  | 4.546909  | -12.934479 | -4.321911 |
| 1POD | A | SER | 71  | E | -7.161552  | 5.237523  | -12.631129 | -4.289492 |
| 1POD | A | GLY | 72  | T | -7.142902  | 5.305179  | -12.655556 | -4.295385 |
| 1POD | A | SER | 73  | T | -7.172601  | 5.161037  | -12.630931 | -4.268127 |
| 1POD | A | ARG | 74  | E | -7.204522  | 5.258578  | -12.514087 | -4.265941 |
| 1POD | A | ILE | 75  | E | -7.798817  | 7.138764  | -12.208600 | -4.299552 |
| 1POD | A | THR | 76  | E | -8.799759  | 8.009180  | -14.400607 | -4.993530 |
| 1POD | A | CYS | 77  | E | -8.880189  | 7.856394  | -15.738518 | -5.834559 |
| 1POD | A | ALA | 78  | T | -8.539242  | 7.225158  | -15.520252 | -5.769032 |
| 1POD | A | LYS | 79  | T | -8.555820  | 7.092182  | -15.711498 | -5.869036 |
| 1POD | A | GLN | 80  | T | -8.605921  | 6.733025  | -15.867424 | -5.877277 |
| 1POD | A | ASP | 81  | C | -8.672514  | 6.655817  | -15.765927 | -5.837475 |
| 1POD | A | SER | 82  | H | -8.902180  | 6.491905  | -15.594587 | -5.672853 |
| 1POD | A | CYS | 83  | H | -10.038103 | 6.185092  | -17.658211 | -5.865192 |
| 1POD | A | ARG | 84  | H | -10.840956 | 6.265229  | -18.027471 | -5.389011 |
| 1POD | A | SER | 85  | H | -11.594893 | 7.916727  | -18.127617 | -5.248394 |
| 1POD | A | GLN | 86  | H | -11.708393 | 10.269309 | -17.657170 | -5.672606 |
| 1POD | A | LEU | 87  | H | -11.759929 | 10.409545 | -17.653619 | -5.723227 |
| 1POD | A | CYS | 88  | H | -11.766757 | 10.320317 | -17.689480 | -5.728995 |
| 1POD | A | GLU | 89  | H | -11.712952 | 9.830511  | -17.961482 | -5.700210 |
| 1POD | A | CYS | 90  | H | -11.734893 | 9.612760  | -18.028320 | -5.665514 |
| 1POD | A | ASP | 91  | H | -12.139386 | 8.313094  | -18.813043 | -5.118550 |
| 1POD | A | LYS | 92  | H | -11.035809 | 9.287878  | -15.293733 | -4.453139 |
| 1POD | A | ALA | 93  | H | -9.926209  | 8.211899  | -14.129688 | -4.230128 |
| 1POD | A | ALA | 94  | H | -9.925768  | 8.258140  | -14.104862 | -4.228110 |
| 1POD | A | ALA | 95  | H | -9.924154  | 8.296244  | -14.094918 | -4.229921 |
| 1POD | A | THR | 96  | H | -9.801290  | 8.898283  | -13.997580 | -4.297608 |
| 1POD | A | CYS | 97  | H | -9.856521  | 8.893301  | -13.937812 | -4.302798 |
| 1POD | A | PHE | 98  | H | -10.648830 | 11.658838 | -14.056019 | -4.665739 |
| 1POD | A | ALA | 99  | H | -8.085467  | 7.124597  | -12.218157 | -4.379132 |
| 1POD | A | ARG | 100 | H | -7.457496  | 6.308025  | -12.340140 | -4.419252 |
| 1POD | A | ASN | 101 | H | -7.451786  | 6.335068  | -12.366618 | -4.432255 |
| 1POD | A | LYS | 102 | G | -7.424798  | 6.445611  | -12.430277 | -4.466871 |
| 1POD | A | THR | 103 | G | -7.330468  | 6.571775  | -12.523443 | -4.515482 |
| 1POD | A | THR | 104 | G | -7.469594  | 6.563803  | -12.713068 | -4.611319 |
| 1POD | A | TYR | 105 | C | -8.037396  | 8.505953  | -13.192518 | -5.014607 |

|      |   |     |     |   |            |           |            |           |
|------|---|-----|-----|---|------------|-----------|------------|-----------|
| 1POD | A | ASN | 106 | T | -7.937943  | 8.730728  | -13.139825 | -5.068171 |
| 1POD | A | LYS | 107 | T | -7.997462  | 8.764806  | -13.068474 | -5.055316 |
| 1POD | A | LYS | 108 | T | -8.356380  | 9.975383  | -13.070360 | -5.270093 |
| 1POD | A | TYR | 109 | T | -8.636700  | 10.855279 | -12.864915 | -5.389913 |
| 1POD | A | GLN | 110 | T | -8.903894  | 10.078838 | -13.192031 | -5.374394 |
| 1POD | A | TYR | 111 | T | -10.572960 | 12.438067 | -13.963580 | -5.363686 |
| 1POD | A | TYR | 112 | T | -10.725821 | 6.722493  | -16.728043 | -4.992130 |
| 1POD | A | SER | 113 | C | -9.035490  | 4.243292  | -15.861672 | -4.981648 |
| 1POD | A | ASN | 114 | G | -8.962083  | 4.313359  | -16.048459 | -5.019183 |
| 1POD | A | LYS | 115 | G | -6.958542  | 3.759100  | -13.326657 | -4.884518 |
| 1POD | A | HIS | 116 | G | -6.906493  | 3.929045  | -13.484347 | -4.940097 |
| 1POD | A | CYS | 117 | C | -6.683932  | 5.058799  | -13.417145 | -5.321620 |
| 1POD | A | ARG | 118 | C | -5.279309  | 6.700717  | -9.811773  | -4.973044 |
| 1POD | A | GLY | 119 | C | -3.040606  | 6.076259  | -6.174833  | -4.282159 |
| 1POD | A | SER | 120 | C | -2.704199  | 6.002661  | -5.686493  | -3.821337 |
| 1POD | A | THR | 121 | C | -1.781986  | 5.957788  | -3.539311  | -2.998978 |
| 1POD | A | PRO | 122 | C | -1.781986  | 5.957788  | -3.539311  | -2.998978 |
| 1POD | A | ARG | 123 | C | -1.781986  | 5.957788  | -3.539311  | -2.998978 |
| 1POD | A | CYS | 124 | C | -1.781986  | 5.957788  | -3.539311  | -2.998978 |
| 1QBO | A | ASP | 374 | C | -7.289827  | 4.914261  | -12.889871 | -4.331319 |
| 1QBO | A | HIS | 375 | C | -7.289827  | 4.914261  | -12.889871 | -4.331319 |
| 1QBO | A | ARG | 376 | C | -7.289827  | 4.914261  | -12.889871 | -4.331319 |
| 1QBO | A | GLU | 377 | C | -7.289827  | 4.914261  | -12.889871 | -4.331319 |
| 1QBO | A | LEU | 378 | B | -7.980579  | 6.952972  | -13.010240 | -4.841910 |
| 1QBO | A | ILE | 379 | T | -9.804965  | 11.094591 | -14.706973 | -5.622079 |
| 1QBO | A | GLY | 380 | T | -10.162311 | 11.520434 | -15.248457 | -5.650780 |
| 1QBO | A | ASP | 381 | T | -9.960053  | 11.720773 | -14.528416 | -5.390620 |
| 1QBO | A | TYR | 382 | T | -9.953918  | 11.771333 | -14.525945 | -5.391057 |
| 1QBO | A | SER | 383 | C | -10.006080 | 11.791508 | -14.605724 | -5.470057 |
| 1QBO | A | LYS | 384 | C | -10.058021 | 11.801872 | -14.566054 | -5.499727 |
| 1QBO | A | ALA | 385 | B | -10.337895 | 12.948178 | -13.953766 | -5.368045 |
| 1QBO | A | PHE | 386 | C | -10.478309 | 17.779119 | -11.849290 | -5.496676 |
| 1QBO | A | LEU | 387 | C | -8.010525  | 13.496374 | -9.528583  | -4.857005 |
| 1QBO | A | LEU | 388 | C | -7.143217  | 10.331242 | -10.408434 | -4.836686 |
| 1QBO | A | GLN | 389 | C | -5.203092  | 6.577051  | -9.619439  | -4.850930 |
| 1QBO | A | THR | 390 | C | -5.022709  | 6.901216  | -9.787180  | -4.979485 |
| 1QBO | A | VAL | 391 | B | -5.015330  | 6.910205  | -9.822470  | -4.983868 |
| 1QBO | A | ASP | 392 | C | -5.004206  | 6.849413  | -9.896984  | -4.989835 |
| 1QBO | A | GLY | 393 | T | -5.014375  | 6.790054  | -9.899729  | -4.994972 |
| 1QBO | A | LYS | 394 | T | -5.726684  | 7.629178  | -10.627702 | -5.328251 |
| 1QBO | A | HIS | 395 | T | -6.894309  | 6.516226  | -12.936422 | -5.261453 |
| 1QBO | A | GLN | 396 | T | -7.102844  | 6.022870  | -13.067638 | -5.231450 |
| 1QBO | A | ASP | 397 | T | -8.247059  | 5.708007  | -14.961604 | -5.480529 |
| 1QBO | A | LEU | 398 | T | -9.628215  | 8.806334  | -15.560395 | -5.677536 |
| 1QBO | A | LYS | 399 | C | -10.470757 | 10.924653 | -15.595506 | -5.996739 |
| 1QBO | A | TYR | 400 | E | -12.230211 | 15.328933 | -15.398575 | -5.481616 |
| 1QBO | A | ILE | 401 | E | -8.948449  | 12.421666 | -10.545010 | -4.310967 |
| 1QBO | A | SER | 402 | C | -8.734198  | 12.645587 | -10.861752 | -4.502782 |
| 1QBO | A | PRO | 403 | H | -8.651317  | 12.836635 | -10.961165 | -4.559719 |
| 1QBO | A | GLU | 404 | H | -8.449544  | 12.778512 | -11.148058 | -4.675663 |
| 1QBO | A | THR | 405 | H | -8.447006  | 12.801032 | -11.151003 | -4.677359 |
| 1QBO | A | MET | 406 | H | -8.775543  | 13.117992 | -11.608939 | -4.951288 |
| 1QBO | A | VAL | 407 | H | -8.808711  | 14.179963 | -10.848271 | -4.736406 |
| 1QBO | A | ALA | 408 | H | -8.151816  | 14.272797 | -9.545405  | -4.594944 |
| 1QBO | A | LEU | 409 | H | -6.155474  | 13.332718 | -6.943176  | -4.605850 |
| 1QBO | A | LEU | 410 | H | -6.019391  | 13.239208 | -7.205952  | -4.623201 |
| 1QBO | A | THR | 411 | H | -5.897510  | 12.481455 | -7.648910  | -4.562475 |
| 1QBO | A | GLY | 412 | T | -5.600535  | 10.808179 | -8.256100  | -4.485640 |
| 1QBO | A | LYS | 413 | T | -5.569618  | 10.741768 | -8.302306  | -4.459498 |
| 1QBO | A | PHE | 414 | T | -5.816699  | 9.410515  | -9.087801  | -4.363867 |
| 1QBO | A | SER | 415 | T | -5.900859  | 8.833763  | -9.267208  | -4.309349 |
| 1QBO | A | ASN | 416 | T | -6.021667  | 8.763588  | -9.204906  | -4.314035 |
| 1QBO | A | ILE | 417 | T | -6.989980  | 10.829061 | -9.277530  | -4.097254 |
| 1QBO | A | VAL | 418 | E | -7.629718  | 11.980084 | -9.521344  | -4.168312 |
| 1QBO | A | ASP | 419 | E | -8.271655  | 10.027684 | -11.562662 | -4.464784 |
| 1QBO | A | LYS | 420 | E | -9.353036  | 11.469510 | -12.786722 | -4.853224 |
| 1QBO | A | PHE | 421 | E | -10.515171 | 16.766416 | -11.937695 | -4.696378 |
| 1QBO | A | VAL | 422 | E | -10.593494 | 16.958078 | -11.789357 | -4.642497 |
| 1QBO | A | ILE | 423 | E | -10.832101 | 17.781898 | -11.424440 | -4.592922 |
| 1QBO | A | VAL | 424 | E | -11.090512 | 18.288533 | -10.939674 | -4.379778 |
| 1QBO | A | ASP | 425 | E | -11.769323 | 17.319629 | -12.287163 | -4.442947 |
| 1QBO | A | CYS | 426 | C | -12.323575 | 15.370497 | -13.699482 | -4.563493 |
| 1QBO | A | ARG | 427 | C | -14.983986 | 15.889146 | -18.389840 | -5.656626 |
| 1QBO | A | TYR | 428 | C | -16.628453 | 18.709242 | -21.009256 | -6.520039 |
| 1QBO | A | PRO | 429 | H | -14.996542 | 16.883650 | -18.282977 | -5.968545 |
| 1QBO | A | TYR | 430 | H | -14.815959 | 16.820418 | -18.621598 | -6.111429 |
| 1QBO | A | GLU | 431 | H | -12.249371 | 11.924570 | -17.379252 | -6.072557 |
| 1QBO | A | TYR | 432 | H | -11.578505 | 11.719273 | -16.615877 | -5.728434 |
| 1QBO | A | GLU | 433 | H | -10.312248 | 11.698271 | -14.212401 | -5.249447 |
| 1QBO | A | GLY | 434 | H | -10.240658 | 11.758581 | -14.323912 | -5.252899 |
| 1QBO | A | GLY | 435 | C | -9.854811  | 11.769480 | -13.947215 | -5.148038 |

|      |   |     |     |   |            |           |            |           |
|------|---|-----|-----|---|------------|-----------|------------|-----------|
| 1QB0 | A | HIS | 436 | E | -9.317615  | 12.488701 | -12.544400 | -4.894189 |
| 1QB0 | A | ILE | 437 | E | -8.438698  | 12.711026 | -10.342249 | -4.344180 |
| 1QB0 | A | LYS | 438 | T | -8.375115  | 12.476543 | -10.534313 | -4.356765 |
| 1QB0 | A | THR | 439 | T | -8.195582  | 12.524566 | -10.466411 | -4.318384 |
| 1QB0 | A | ALA | 440 | T | -8.207791  | 12.562121 | -10.386506 | -4.293781 |
| 1QB0 | A | VAL | 441 | E | -8.259145  | 12.559107 | -10.265489 | -4.248727 |
| 1QB0 | A | ASN | 442 | E | -8.763285  | 12.279102 | -10.997476 | -4.330643 |
| 1QB0 | A | LEU | 443 | C | -8.941933  | 12.827116 | -10.419684 | -4.219825 |
| 1QB0 | A | PRO | 444 | C | -10.421543 | 14.796304 | -12.060694 | -4.308112 |
| 1QB0 | A | LEU | 445 | C | -10.577069 | 14.494684 | -12.795260 | -4.620112 |
| 1QB0 | A | GLU | 446 | H | -11.013751 | 12.679538 | -14.678798 | -5.005762 |
| 1QB0 | A | ARG | 447 | H | -11.009937 | 12.310179 | -14.829549 | -4.968388 |
| 1QB0 | A | ASP | 448 | H | -10.947573 | 12.333648 | -14.890484 | -4.968052 |
| 1QB0 | A | ALA | 449 | H | -11.275763 | 12.149977 | -15.410999 | -4.976726 |
| 1QB0 | A | GLU | 450 | H | -11.743215 | 13.199637 | -15.559785 | -4.901831 |
| 1QB0 | A | SER | 451 | H | -10.514591 | 14.866524 | -11.691831 | -4.326718 |
| 1QB0 | A | PHE | 452 | H | -9.599232  | 15.245419 | -10.194644 | -4.198216 |
| 1QB0 | A | LEU | 453 | H | -8.069990  | 13.271758 | -8.552491  | -3.821396 |
| 1QB0 | A | LEU | 454 | H | -7.177476  | 12.073446 | -8.085354  | -3.685661 |
| 1QB0 | A | LYS | 455 | H | -6.632669  | 10.100262 | -8.509195  | -3.555306 |
| 1QB0 | A | SER | 456 | C | -6.589706  | 10.188846 | -8.521723  | -3.533965 |
| 1QB0 | A | PRO | 457 | C | -6.425532  | 10.408247 | -8.372072  | -3.515978 |
| 1QB0 | A | ILE | 458 | C | -6.430370  | 10.226871 | -8.470047  | -3.520488 |
| 1QB0 | A | ALA | 459 | C | -5.520439  | 6.554147  | -8.780779  | -3.605372 |
| 1QB0 | A | PRO | 460 | T | -4.191078  | 4.920648  | -7.884540  | -3.735655 |
| 1QB0 | A | CYS | 461 | T | -3.932748  | 4.776555  | -8.302365  | -3.949434 |
| 1QB0 | A | SER | 462 | T | -3.934903  | 4.753153  | -8.303906  | -3.951208 |
| 1QB0 | A | LEU | 463 | T | -3.935338  | 4.749359  | -8.302385  | -3.951228 |
| 1QB0 | A | ASP | 464 | T | -3.970401  | 4.678554  | -8.269975  | -3.970242 |
| 1QB0 | A | LYS | 465 | T | -4.548620  | 4.520874  | -9.053569  | -4.331965 |
| 1QB0 | A | ARG | 466 | E | -9.861852  | 8.992215  | -15.071256 | -5.240015 |
| 1QB0 | A | VAL | 467 | E | -10.913717 | 12.194525 | -14.618628 | -5.265195 |
| 1QB0 | A | ILE | 468 | E | -12.543144 | 20.369512 | -12.551487 | -4.770709 |
| 1QB0 | A | LEU | 469 | E | -12.677358 | 21.629598 | -11.476410 | -4.469120 |
| 1QB0 | A | ILE | 470 | E | -12.686115 | 21.627854 | -11.417142 | -4.447136 |
| 1QB0 | A | PHE | 471 | E | -12.731601 | 21.695492 | -11.298613 | -4.440914 |
| 1QB0 | A | HIS | 472 | E | -13.463142 | 20.259645 | -14.188693 | -5.197901 |
| 1QB0 | A | CYS | 473 | T | -12.828925 | 11.941578 | -18.383764 | -6.016704 |
| 1QB0 | A | GLU | 474 | T | -12.450039 | 10.834722 | -18.744555 | -6.039928 |
| 1QB0 | A | PHE | 475 | T | -12.367822 | 10.765034 | -18.875965 | -6.043802 |
| 1QB0 | A | SER | 476 | T | -12.025209 | 9.714600  | -19.101717 | -6.019537 |
| 1QB0 | A | SER | 477 | C | -11.891607 | 9.784469  | -18.914107 | -5.908540 |
| 1QB0 | A | GLU | 478 | H | -11.961546 | 9.496925  | -19.012773 | -5.839925 |
| 1QB0 | A | ARG | 479 | H | -12.108373 | 9.280089  | -19.062400 | -5.789315 |
| 1QB0 | A | GLY | 480 | H | -12.065455 | 9.629828  | -18.740104 | -5.685873 |
| 1QB0 | A | PRO | 481 | H | -12.443691 | 10.705724 | -18.165670 | -5.410062 |
| 1QB0 | A | ARG | 482 | H | -12.889978 | 11.292168 | -18.089531 | -5.307011 |
| 1QB0 | A | MET | 483 | H | -13.156329 | 12.360275 | -17.406656 | -5.271906 |
| 1QB0 | A | CYS | 484 | H | -13.174931 | 12.363362 | -17.315668 | -5.261727 |
| 1QB0 | A | ARG | 485 | H | -15.313022 | 15.307766 | -19.840447 | -5.637496 |
| 1QB0 | A | PHE | 486 | H | -15.010781 | 16.761148 | -18.530500 | -5.646119 |
| 1QB0 | A | ILE | 487 | H | -14.723382 | 15.866459 | -18.760322 | -5.589711 |
| 1QB0 | A | ARG | 488 | H | -14.766409 | 15.669622 | -18.753314 | -5.557814 |
| 1QB0 | A | GLU | 489 | H | -14.190741 | 12.255920 | -19.527674 | -5.352951 |
| 1QB0 | A | ARG | 490 | H | -13.280400 | 10.392312 | -18.495648 | -4.911559 |
| 1QB0 | A | ASP | 491 | H | -12.524364 | 9.282100  | -18.375354 | -5.094407 |
| 1QB0 | A | ARG | 492 | H | -10.300037 | 6.660573  | -16.118438 | -4.865314 |
| 1QB0 | A | ALA | 493 | H | -7.544394  | 7.818910  | -11.630092 | -4.655180 |
| 1QB0 | A | VAL | 494 | H | -7.283560  | 7.838837  | -11.722516 | -4.620756 |
| 1QB0 | A | ASN | 495 | C | -6.927680  | 7.629354  | -11.624660 | -4.587874 |
| 1QB0 | A | ASP | 496 | T | -6.568379  | 9.223437  | -10.368790 | -4.502881 |
| 1QB0 | A | TYR | 497 | T | -6.569046  | 9.232554  | -10.359514 | -4.502385 |
| 1QB0 | A | PRO | 498 | T | -6.694581  | 9.563571  | -10.069832 | -4.466780 |
| 1QB0 | A | SER | 499 | T | -6.778310  | 9.819897  | -9.793569  | -4.452844 |
| 1QB0 | A | LEU | 500 | T | -7.034400  | 11.141792 | -8.867629  | -4.401414 |
| 1QB0 | A | TYR | 501 | T | -10.889241 | 15.804973 | -11.838282 | -4.723982 |
| 1QB0 | A | TYR | 502 | T | -13.504128 | 19.596428 | -14.053519 | -5.012885 |
| 1QB0 | A | PRO | 503 | T | -14.328735 | 19.651344 | -15.374577 | -5.197386 |
| 1QB0 | A | GLU | 504 | T | -15.087369 | 20.417928 | -16.816449 | -5.758196 |
| 1QB0 | A | MET | 505 | E | -15.424811 | 20.737732 | -17.529268 | -5.934013 |
| 1QB0 | A | TYR | 506 | E | -12.693332 | 18.304004 | -13.636353 | -5.341316 |
| 1QB0 | A | ILE | 507 | E | -9.204974  | 14.194670 | -11.000932 | -5.133259 |
| 1QB0 | A | LEU | 508 | E | -9.193432  | 14.216052 | -11.059855 | -5.143122 |
| 1QB0 | A | LYS | 509 | T | -9.191113  | 14.217322 | -11.079614 | -5.146404 |
| 1QB0 | A | GLY | 510 | T | -9.170870  | 14.154166 | -11.214215 | -5.160801 |
| 1QB0 | A | GLY | 511 | H | -9.171388  | 14.150617 | -11.213375 | -5.161217 |
| 1QB0 | A | TYR | 512 | H | -10.860824 | 13.623033 | -14.800647 | -5.627047 |
| 1QB0 | A | LYS | 513 | H | -10.980973 | 13.671734 | -14.692192 | -5.499003 |
| 1QB0 | A | GLU | 514 | H | -10.806419 | 14.759045 | -13.742098 | -5.267790 |
| 1QB0 | A | PHE | 515 | H | -10.852680 | 17.812520 | -11.604403 | -4.792276 |
| 1QB0 | A | PHE | 516 | H | -9.714102  | 13.190914 | -11.531801 | -4.308264 |

|      |   |     |     |   |            |           |            |           |
|------|---|-----|-----|---|------------|-----------|------------|-----------|
| 1QB0 | A | PRO | 517 | H | -8.670090  | 9.880527  | -12.034328 | -4.389618 |
| 1QB0 | A | GLN | 518 | H | -8.645331  | 9.969522  | -12.091615 | -4.414389 |
| 1QB0 | A | HIS | 519 | C | -8.639313  | 9.967644  | -12.128891 | -4.426634 |
| 1QB0 | A | PRO | 520 | G | -8.632521  | 9.932265  | -12.195734 | -4.448191 |
| 1QB0 | A | ASN | 521 | G | -8.714702  | 9.554312  | -12.332782 | -4.491051 |
| 1QB0 | A | PHE | 522 | G | -9.963032  | 12.556160 | -14.026861 | -5.198067 |
| 1QB0 | A | CYS | 523 | E | -9.312098  | 8.449353  | -14.557248 | -4.999758 |
| 1QB0 | A | GLU | 524 | E | -9.281648  | 8.674187  | -14.467148 | -4.999518 |
| 1QB0 | A | PRO | 525 | T | -9.322857  | 8.400696  | -14.469779 | -4.964304 |
| 1QB0 | A | GLN | 526 | T | -9.335683  | 8.351992  | -14.443870 | -4.956535 |
| 1QB0 | A | ASP | 527 | C | -9.360493  | 8.176919  | -14.441172 | -4.946445 |
| 1QB0 | A | TYR | 528 | C | -10.564016 | 13.290905 | -13.578712 | -5.166205 |
| 1QB0 | A | ARG | 529 | C | -10.532279 | 13.002208 | -13.783687 | -5.229475 |
| 1QB0 | A | PRO | 530 | T | -7.691909  | 9.960296  | -11.421921 | -5.210446 |
| 1QB0 | A | MET | 531 | T | -7.044396  | 9.561488  | -11.274454 | -5.229352 |
| 1QB0 | A | ASN | 532 | T | -6.435147  | 10.360939 | -10.083692 | -5.105407 |
| 1QB0 | A | HIS | 533 | T | -6.326467  | 10.220566 | -10.155599 | -5.033261 |
| 1QB0 | A | GLU | 534 | T | -6.269519  | 10.090785 | -10.272888 | -5.013847 |
| 1QB0 | A | ALA | 535 | T | -6.318828  | 10.100993 | -10.193312 | -4.995265 |
| 1QB0 | A | PHE | 536 | T | -6.447539  | 10.280889 | -9.949501  | -4.936172 |
| 1QB0 | A | LYS | 537 | H | -7.069980  | 9.283429  | -11.014767 | -4.756124 |
| 1QB0 | A | ASP | 538 | H | -7.546247  | 8.958308  | -11.834588 | -4.866288 |
| 1QB0 | A | GLU | 539 | H | -8.488431  | 9.458573  | -13.335146 | -5.031743 |
| 1QB0 | A | LEU | 540 | H | -8.816771  | 9.325681  | -13.513392 | -5.002073 |
| 1QB0 | A | LYS | 541 | H | -8.814435  | 9.347916  | -13.496385 | -4.992291 |
| 1QB0 | A | THR | 542 | H | -9.009218  | 9.424616  | -13.065688 | -4.791265 |
| 1QB0 | A | PHE | 543 | H | -10.633957 | 13.305705 | -13.457562 | -4.697668 |
| 1QB0 | A | ARG | 544 | H | -10.470250 | 12.136169 | -14.668039 | -5.208348 |
| 1QB0 | A | LEU | 545 | H | -8.729321  | 8.121034  | -14.447736 | -5.649096 |
| 1QB0 | A | LYS | 546 | C | -8.124180  | 7.906552  | -13.665918 | -5.289119 |
| 1QB0 | A | THR | 547 | C | -5.794978  | 5.991394  | -9.368785  | -3.869516 |
| 1QB0 | A | ARG | 548 | C | -5.794978  | 5.991394  | -9.368785  | -3.869516 |
| 1QB0 | A | SER | 549 | C | -5.794978  | 5.991394  | -9.368785  | -3.869516 |
| 1QB0 | A | TRP | 550 | C | -5.794978  | 5.991394  | -9.368785  | -3.869516 |
| 1QDD | A | GLN | 1   | T | -0.735342  | 0.313963  | -8.526265  | -5.388250 |
| 1QDD | A | GLU | 2   | T | -0.735342  | 0.313963  | -8.526265  | -5.388250 |
| 1QDD | A | ALA | 3   | T | -0.735342  | 0.313963  | -8.526265  | -5.388250 |
| 1QDD | A | GLN | 4   | T | -0.735342  | 0.313963  | -8.526265  | -5.388250 |
| 1QDD | A | THR | 5   | C | -0.737140  | 0.354914  | -8.507569  | -5.395080 |
| 1QDD | A | GLU | 6   | C | -0.773436  | 0.396908  | -8.407930  | -5.412744 |
| 1QDD | A | LEU | 7   | C | -0.912128  | 0.621841  | -8.050773  | -5.370036 |
| 1QDD | A | PRO | 8   | C | -1.551375  | 0.722518  | -7.815632  | -5.083634 |
| 1QDD | A | GLN | 9   | G | -3.235939  | 1.945052  | -7.979686  | -3.737452 |
| 1QDD | A | ALA | 10  | G | -4.366937  | 1.598468  | -10.969651 | -4.987132 |
| 1QDD | A | ARG | 11  | G | -7.361375  | 3.425012  | -17.992479 | -7.474652 |
| 1QDD | A | ILE | 12  | C | -5.968996  | 5.149061  | -8.335237  | -2.943891 |
| 1QDD | A | SER | 13  | C | -5.033976  | 4.040391  | -8.860841  | -3.532491 |
| 1QDD | A | CYS | 14  | C | -2.947705  | 4.995618  | -5.539049  | -3.721874 |
| 1QDD | A | PRO | 15  | T | -2.727276  | 5.267321  | -5.282151  | -3.551231 |
| 1QDD | A | GLU | 16  | T | -2.699297  | 5.310010  | -5.329235  | -3.544735 |
| 1QDD | A | GLY | 17  | T | -2.701608  | 5.310133  | -5.319150  | -3.547848 |
| 1QDD | A | THR | 18  | T | -2.711097  | 5.333590  | -5.257182  | -3.544068 |
| 1QDD | A | ASN | 19  | E | -3.342229  | 5.845243  | -4.852462  | -3.154088 |
| 1QDD | A | ALA | 20  | E | -4.533364  | 6.092344  | -6.202142  | -3.340529 |
| 1QDD | A | TYR | 21  | E | -8.818441  | 11.766220 | -10.769234 | -3.902322 |
| 1QDD | A | ARG | 22  | T | -8.940237  | 11.753894 | -10.536290 | -3.757139 |
| 1QDD | A | SER | 23  | T | -9.054302  | 11.748509 | -10.241122 | -3.634705 |
| 1QDD | A | TYR | 24  | E | -9.379615  | 12.776173 | -9.284665  | -3.421231 |
| 1QDD | A | CYS | 25  | E | -10.751369 | 12.543205 | -11.491016 | -3.819638 |
| 1QDD | A | TYR | 26  | E | -13.237066 | 14.191246 | -14.502563 | -4.259131 |
| 1QDD | A | TYR | 27  | E | -13.170808 | 15.784209 | -14.821280 | -5.230072 |
| 1QDD | A | PHE | 28  | E | -11.095077 | 12.552884 | -14.197906 | -5.299544 |
| 1QDD | A | ASN | 29  | E | -10.594137 | 10.418771 | -14.724452 | -5.028352 |
| 1QDD | A | GLU | 30  | E | -10.207135 | 9.669018  | -14.194067 | -4.592092 |
| 1QDD | A | ASP | 31  | E | -10.206244 | 9.673087  | -14.196993 | -4.591542 |
| 1QDD | A | ARG | 32  | E | -10.208897 | 9.639837  | -14.196371 | -4.586336 |
| 1QDD | A | GLU | 33  | E | -10.163420 | 9.477979  | -14.035107 | -4.415277 |
| 1QDD | A | THR | 34  | C | -9.303372  | 11.395444 | -10.808713 | -3.828939 |
| 1QDD | A | TRP | 35  | H | -9.363983  | 11.691884 | -10.506813 | -3.795198 |
| 1QDD | A | VAL | 36  | H | -9.251746  | 10.954217 | -10.893925 | -3.695210 |
| 1QDD | A | ASP | 37  | H | -9.251609  | 10.954097 | -10.895201 | -3.695371 |
| 1QDD | A | ALA | 38  | H | -9.287557  | 10.944612 | -10.727052 | -3.645883 |
| 1QDD | A | ASP | 39  | H | -10.266366 | 7.608453  | -12.814907 | -3.246285 |
| 1QDD | A | LEU | 40  | H | -10.257077 | 7.536028  | -12.903905 | -3.267578 |
| 1QDD | A | TYR | 41  | H | -11.754569 | 9.076096  | -15.650425 | -4.129910 |
| 1QDD | A | CYS | 42  | H | -9.621957  | 6.651868  | -13.798502 | -4.227777 |
| 1QDD | A | GLN | 43  | H | -7.712100  | 6.052854  | -11.783299 | -4.133592 |
| 1QDD | A | ASN | 44  | H | -6.259109  | 5.990322  | -9.523594  | -3.800097 |
| 1QDD | A | MET | 45  | T | -6.251154  | 6.012976  | -9.548692  | -3.799741 |
| 1QDD | A | ASN | 46  | T | -6.244975  | 6.048332  | -9.559542  | -3.798764 |
| 1QDD | A | SER | 47  | T | -6.246410  | 6.050573  | -9.547480  | -3.797018 |

|      |   |     |     |   |            |           |            |           |
|------|---|-----|-----|---|------------|-----------|------------|-----------|
| 1QDD | A | GLY | 48  | T | -6.296291  | 6.053710  | -9.358793  | -3.767903 |
| 1QDD | A | ASN | 49  | E | -8.437027  | 8.577065  | -11.100787 | -3.741149 |
| 1QDD | A | LEU | 50  | E | -8.888533  | 9.635554  | -10.729112 | -3.701429 |
| 1QDD | A | VAL | 51  | C | -10.064429 | 12.003119 | -11.562399 | -3.612586 |
| 1QDD | A | SER | 52  | C | -10.389478 | 12.909263 | -11.956620 | -3.870982 |
| 1QDD | A | VAL | 53  | C | -9.382884  | 10.568291 | -11.372482 | -3.774843 |
| 1QDD | A | LEU | 54  | C | -9.284673  | 10.126760 | -11.764049 | -3.827175 |
| 1QDD | A | THR | 55  | C | -9.112576  | 9.174001  | -12.090102 | -3.735234 |
| 1QDD | A | GLN | 56  | H | -9.002514  | 8.416564  | -12.362633 | -3.690060 |
| 1QDD | A | ALA | 57  | H | -9.010935  | 8.379741  | -12.353137 | -3.686027 |
| 1QDD | A | GLU | 58  | H | -9.364024  | 6.975474  | -13.196248 | -3.602320 |
| 1QDD | A | GLY | 59  | H | -9.412615  | 7.355142  | -12.812287 | -3.460507 |
| 1QDD | A | ALA | 60  | H | -9.734917  | 7.980700  | -12.657588 | -3.437806 |
| 1QDD | A | PHE | 61  | H | -10.537332 | 12.355578 | -11.406906 | -3.319809 |
| 1QDD | A | VAL | 62  | H | -10.502143 | 12.742952 | -11.232716 | -3.298689 |
| 1QDD | A | ALA | 63  | H | -10.328938 | 13.059017 | -11.553023 | -3.619389 |
| 1QDD | A | SER | 64  | H | -9.411938  | 11.540354 | -10.410200 | -3.528212 |
| 1QDD | A | LEU | 65  | H | -8.839027  | 11.809909 | -9.449601  | -3.341262 |
| 1QDD | A | ILE | 66  | H | -6.567617  | 7.616121  | -8.033258  | -3.278667 |
| 1QDD | A | LYS | 67  | H | -5.488503  | 6.125037  | -8.324781  | -3.716491 |
| 1QDD | A | GLU | 68  | H | -5.139126  | 5.334998  | -9.126344  | -3.993776 |
| 1QDD | A | SER | 69  | H | -5.129884  | 5.323791  | -9.178070  | -4.001272 |
| 1QDD | A | GLY | 70  | C | -5.106435  | 5.272919  | -9.261586  | -4.003304 |
| 1QDD | A | THR | 71  | C | -5.157294  | 5.070572  | -9.379005  | -4.069295 |
| 1QDD | A | ASP | 72  | C | -5.543793  | 4.365191  | -10.297354 | -4.315652 |
| 1QDD | A | ASP | 73  | C | -6.809682  | 4.466808  | -11.600073 | -4.146407 |
| 1QDD | A | PHE | 74  | C | -6.999980  | 4.310725  | -11.307063 | -4.036709 |
| 1QDD | A | ASN | 75  | E | -9.200938  | 7.256235  | -13.314982 | -4.366332 |
| 1QDD | A | VAL | 76  | E | -10.212151 | 9.868120  | -12.938260 | -3.995237 |
| 1QDD | A | TRP | 77  | E | -11.153048 | 18.499736 | -8.949669  | -3.292753 |
| 1QDD | A | ILE | 78  | E | -11.029979 | 18.003652 | -9.550434  | -3.473514 |
| 1QDD | A | GLY | 79  | E | -10.628662 | 15.454340 | -10.701282 | -3.710891 |
| 1QDD | A | LEU | 80  | E | -10.072755 | 13.345535 | -10.486331 | -3.448376 |
| 1QDD | A | HIS | 81  | E | -7.352860  | 8.988267  | -8.383125  | -3.365242 |
| 1QDD | A | ASP | 82  | T | -5.506864  | 6.923122  | -7.383996  | -3.451774 |
| 1QDD | A | PRO | 83  | T | -5.435958  | 6.946676  | -7.632375  | -3.507430 |
| 1QDD | A | LYS | 84  | T | -5.429233  | 6.928729  | -7.680413  | -3.510378 |
| 1QDD | A | LYS | 85  | T | -5.429323  | 6.927854  | -7.680176  | -3.510460 |
| 1QDD | A | ASN | 86  | C | -5.452593  | 6.846783  | -7.653045  | -3.516318 |
| 1QDD | A | ARG | 87  | C | -6.670696  | 6.978335  | -9.800935  | -3.928253 |
| 1QDD | A | ALA | 88  | C | -8.074219  | 5.492097  | -11.891567 | -3.769642 |
| 1QDD | A | TRP | 89  | C | -10.647294 | 11.788766 | -12.217599 | -3.799889 |
| 1QDD | A | HIS | 90  | E | -10.955048 | 11.847110 | -13.028671 | -4.060660 |
| 1QDD | A | TRP | 91  | E | -10.408241 | 11.038464 | -12.957328 | -4.425594 |
| 1QDD | A | SER | 92  | T | -7.432826  | 4.614960  | -11.568870 | -3.910351 |
| 1QDD | A | SER | 93  | T | -5.643379  | 4.879481  | -9.324129  | -3.801177 |
| 1QDD | A | GLY | 94  | T | -5.287250  | 4.432144  | -9.170271  | -3.537145 |
| 1QDD | A | SER | 95  | C | -5.287098  | 4.433250  | -9.170828  | -3.536999 |
| 1QDD | A | LEU | 96  | C | -5.272163  | 4.556994  | -9.132229  | -3.520853 |
| 1QDD | A | VAL | 97  | C | -5.287277  | 4.561063  | -9.068746  | -3.510551 |
| 1QDD | A | SER | 98  | C | -5.724022  | 4.199517  | -8.914997  | -3.199562 |
| 1QDD | A | TYR | 99  | C | -7.430847  | 9.470832  | -7.791393  | -2.924247 |
| 1QDD | A | LYS | 100 | C | -6.683780  | 9.582995  | -7.325679  | -3.110014 |
| 1QDD | A | SER | 101 | C | -6.246156  | 8.454291  | -7.781644  | -3.419706 |
| 1QDD | A | TRP | 102 | B | -4.091836  | 8.058854  | -4.545611  | -3.116853 |
| 1QDD | A | GLY | 103 | T | -2.173943  | 4.372109  | -4.078512  | -2.991219 |
| 1QDD | A | ILE | 104 | T | -2.168417  | 4.382397  | -4.112614  | -2.994804 |
| 1QDD | A | GLY | 105 | T | -2.168572  | 4.380624  | -4.111966  | -2.994653 |
| 1QDD | A | ALA | 106 | T | -2.168938  | 4.378223  | -4.109443  | -2.994105 |
| 1QDD | A | PRO | 107 | T | -2.184144  | 4.221581  | -4.125832  | -2.978626 |
| 1QDD | A | SER | 108 | T | -3.905469  | 3.899665  | -7.665921  | -3.242209 |
| 1QDD | A | SER | 109 | T | -3.118802  | 3.437577  | -6.175918  | -3.020673 |
| 1QDD | A | VAL | 110 | T | -3.115434  | 3.462173  | -6.183268  | -3.023500 |
| 1QDD | A | ASN | 111 | T | -3.115637  | 3.461430  | -6.182458  | -3.023888 |
| 1QDD | A | PRO | 112 | T | -3.157896  | 3.398278  | -6.153420  | -3.059039 |
| 1QDD | A | GLY | 113 | C | -3.263416  | 3.410111  | -5.744982  | -2.953967 |
| 1QDD | A | TYR | 114 | C | -6.128574  | 7.656671  | -7.580394  | -3.420265 |
| 1QDD | A | CYS | 115 | E | -8.835007  | 9.529039  | -10.867432 | -3.952177 |
| 1QDD | A | VAL | 116 | E | -10.720536 | 12.439800 | -11.796178 | -3.809653 |
| 1QDD | A | SER | 117 | E | -11.813954 | 11.489289 | -14.410113 | -3.873092 |
| 1QDD | A | LEU | 118 | E | -9.671537  | 9.853475  | -12.076459 | -3.981024 |
| 1QDD | A | THR | 119 | E | -6.740272  | 6.222859  | -10.025936 | -3.971981 |
| 1QDD | A | SER | 120 | G | -6.719569  | 6.366553  | -10.011758 | -3.958413 |
| 1QDD | A | SER | 121 | G | -6.711079  | 6.438378  | -10.010480 | -3.954950 |
| 1QDD | A | THR | 122 | G | -6.709548  | 6.454391  | -10.014068 | -3.956041 |
| 1QDD | A | GLY | 123 | T | -6.713457  | 6.432275  | -10.000743 | -3.955851 |
| 1QDD | A | PHE | 124 | T | -8.476214  | 10.808910 | -9.804780  | -3.657102 |
| 1QDD | A | GLN | 125 | T | -9.126891  | 11.609205 | -10.181245 | -3.817912 |
| 1QDD | A | LYS | 126 | E | -10.208036 | 12.647093 | -11.537614 | -4.358056 |
| 1QDD | A | TRP | 127 | E | -12.288631 | 16.825713 | -13.042295 | -4.401209 |
| 1QDD | A | LYS | 128 | E | -10.728278 | 9.854346  | -13.920687 | -4.283619 |

|      |   |     |     |   |            |           |            |           |
|------|---|-----|-----|---|------------|-----------|------------|-----------|
| 1QDD | A | ASP | 129 | E | -9.413142  | 7.997448  | -12.556748 | -3.779812 |
| 1QDD | A | VAL | 130 | E | -7.224854  | 6.891454  | -8.845746  | -2.952312 |
| 1QDD | A | PRO | 131 | T | -5.825457  | 6.956085  | -7.527433  | -3.241144 |
| 1QDD | A | CYS | 132 | T | -5.816076  | 7.016740  | -7.558334  | -3.253379 |
| 1QDD | A | GLU | 133 | T | -5.812403  | 7.045293  | -7.577574  | -3.261898 |
| 1QDD | A | ASP | 134 | T | -5.813601  | 7.044043  | -7.567823  | -3.260993 |
| 1QDD | A | LYS | 135 | C | -5.869527  | 7.061966  | -7.450627  | -3.293613 |
| 1QDD | A | PHE | 136 | E | -8.071948  | 11.043464 | -9.875854  | -4.194328 |
| 1QDD | A | SER | 137 | E | -8.800792  | 11.586567 | -10.796768 | -4.617486 |
| 1QDD | A | PHE | 138 | E | -11.907184 | 17.170834 | -11.767287 | -4.344342 |
| 1QDD | A | VAL | 139 | E | -12.731179 | 18.921764 | -10.609336 | -3.719039 |
| 1QDD | A | CYS | 140 | E | -14.419243 | 16.793109 | -15.128024 | -4.346503 |
| 1QDD | A | LYS | 141 | E | -12.487104 | 13.829001 | -13.356859 | -4.057985 |
| 1QDD | A | PHE | 142 | E | -12.487104 | 13.829001 | -13.356859 | -4.057985 |
| 1QDD | A | LYS | 143 | E | -12.487104 | 13.829001 | -13.356859 | -4.057985 |
| 1QDD | A | ASN | 144 | C | -12.487104 | 13.829001 | -13.356859 | -4.057985 |
| 1QKT | A | ASN | 304 | C | -5.144151  | 3.984058  | -6.982800  | -2.143034 |
| 1QKT | A | SER | 305 | T | -5.144151  | 3.984058  | -6.982800  | -2.143034 |
| 1QKT | A | LEU | 306 | T | -5.144151  | 3.984058  | -6.982800  | -2.143034 |
| 1QKT | A | ALA | 307 | T | -5.144151  | 3.984058  | -6.982800  | -2.143034 |
| 1QKT | A | LEU | 308 | T | -7.003321  | 5.596312  | -9.066677  | -2.458588 |
| 1QKT | A | SER | 309 | T | -7.708395  | 6.747161  | -11.143855 | -3.683172 |
| 1QKT | A | LEU | 310 | T | -8.445737  | 8.672347  | -12.506236 | -4.628378 |
| 1QKT | A | THR | 311 | C | -9.124079  | 8.393311  | -13.756191 | -4.505546 |
| 1QKT | A | ALA | 312 | H | -9.377600  | 7.546817  | -13.010484 | -3.382557 |
| 1QKT | A | ASP | 313 | H | -9.522424  | 6.768119  | -12.906294 | -3.112595 |
| 1QKT | A | GLN | 314 | H | -9.609912  | 6.881006  | -12.962606 | -3.256613 |
| 1QKT | A | MET | 315 | H | -10.304024 | 8.126414  | -13.878998 | -3.970042 |
| 1QKT | A | VAL | 316 | H | -11.753424 | 11.393808 | -14.921523 | -4.378640 |
| 1QKT | A | SER | 317 | H | -11.224384 | 9.691694  | -14.092712 | -3.818273 |
| 1QKT | A | ALA | 318 | H | -11.092250 | 9.916963  | -13.756597 | -3.613946 |
| 1QKT | A | LEU | 319 | H | -10.973347 | 9.927364  | -13.485359 | -3.398487 |
| 1QKT | A | LEU | 320 | H | -10.261516 | 9.668703  | -12.233784 | -3.093230 |
| 1QKT | A | ASP | 321 | H | -9.705240  | 9.145080  | -12.035122 | -3.177779 |
| 1QKT | A | ALA | 322 | H | -7.548277  | 10.847868 | -8.346322  | -3.730449 |
| 1QKT | A | GLU | 323 | C | -7.036793  | 11.030081 | -7.605836  | -3.332192 |
| 1QKT | A | PRO | 324 | C | -6.805544  | 11.207897 | -6.692399  | -2.800801 |
| 1QKT | A | PRO | 325 | C | -6.798919  | 11.224989 | -6.711856  | -2.803585 |
| 1QKT | A | ILE | 326 | C | -6.801351  | 11.236656 | -6.690873  | -2.802274 |
| 1QKT | A | LEU | 327 | C | -6.993130  | 11.368581 | -6.092176  | -2.441684 |
| 1QKT | A | TYR | 328 | C | -7.449840  | 11.607741 | -4.958407  | -1.744767 |
| 1QKT | A | SER | 329 | C | -9.238711  | 11.658575 | -9.569260  | -3.100290 |
| 1QKT | A | GLU | 330 | C | -7.268875  | 7.521520  | -9.314672  | -3.426910 |
| 1QKT | A | TYR | 331 | C | -6.240664  | 7.103948  | -8.172315  | -3.059748 |
| 1QKT | A | ASP | 332 | T | -3.900172  | 4.790193  | -6.309070  | -3.334449 |
| 1QKT | A | PRO | 333 | T | -3.899080  | 4.796900  | -6.312957  | -3.333241 |
| 1QKT | A | THR | 334 | T | -3.898643  | 4.798020  | -6.314196  | -3.331808 |
| 1QKT | A | ARG | 335 | T | -3.898816  | 4.794591  | -6.310429  | -3.328260 |
| 1QKT | A | PRO | 336 | T | -3.902622  | 4.781430  | -6.301489  | -3.329016 |
| 1QKT | A | PHE | 337 | T | -6.237297  | 7.550715  | -8.497566  | -2.964971 |
| 1QKT | A | SER | 338 | T | -6.290036  | 7.474958  | -8.532406  | -2.999385 |
| 1QKT | A | GLU | 339 | T | -6.315894  | 7.525023  | -8.552810  | -3.069493 |
| 1QKT | A | ALA | 340 | T | -6.434248  | 7.718679  | -8.598746  | -3.243673 |
| 1QKT | A | SER | 341 | C | -7.111266  | 8.943765  | -9.673537  | -4.123071 |
| 1QKT | A | MET | 342 | H | -8.934732  | 8.943352  | -10.943563 | -3.333981 |
| 1QKT | A | MET | 343 | H | -10.368728 | 10.533340 | -13.077937 | -3.745999 |
| 1QKT | A | GLY | 344 | H | -10.363818 | 10.369660 | -13.112818 | -3.711862 |
| 1QKT | A | LEU | 345 | H | -10.693595 | 11.012353 | -13.172609 | -3.807461 |
| 1QKT | A | LEU | 346 | H | -10.812544 | 11.116450 | -12.935773 | -3.711486 |
| 1QKT | A | THR | 347 | H | -10.461525 | 9.821411  | -13.708545 | -4.023279 |
| 1QKT | A | ASN | 348 | H | -10.769879 | 8.639014  | -14.475835 | -4.139744 |
| 1QKT | A | LEU | 349 | H | -10.877122 | 8.714130  | -14.703117 | -4.442695 |
| 1QKT | A | ALA | 350 | H | -10.879282 | 8.700024  | -14.703812 | -4.447279 |
| 1QKT | A | ASP | 351 | H | -10.895299 | 8.642259  | -14.698297 | -4.473140 |
| 1QKT | A | ARG | 352 | H | -13.896448 | 11.304161 | -17.660008 | -3.988206 |
| 1QKT | A | GLU | 353 | H | -13.662180 | 13.100958 | -16.540727 | -4.144498 |
| 1QKT | A | LEU | 354 | H | -13.350817 | 13.688729 | -14.777061 | -3.448643 |
| 1QKT | A | VAL | 355 | H | -11.925733 | 11.494725 | -13.193066 | -3.278807 |
| 1QKT | A | HIS | 356 | H | -11.924544 | 11.589807 | -13.151800 | -3.281966 |
| 1QKT | A | MET | 357 | H | -11.816570 | 12.553818 | -13.162559 | -3.565074 |
| 1QKT | A | ILE | 358 | H | -11.734881 | 13.091755 | -12.990605 | -3.579230 |
| 1QKT | A | ASN | 359 | H | -11.744524 | 13.064078 | -13.011753 | -3.597841 |
| 1QKT | A | TRP | 360 | H | -12.382095 | 16.843434 | -12.893054 | -4.259964 |
| 1QKT | A | ALA | 361 | H | -11.546564 | 14.761231 | -11.819505 | -3.565921 |
| 1QKT | A | LYS | 362 | H | -10.895101 | 12.440809 | -10.071571 | -2.195962 |
| 1QKT | A | ARG | 363 | H | -10.825747 | 12.780397 | -10.032916 | -2.231200 |
| 1QKT | A | VAL | 364 | T | -10.632447 | 13.021458 | -9.681058  | -2.093938 |
| 1QKT | A | PRO | 365 | T | -10.507992 | 12.751890 | -9.850188  | -2.118199 |
| 1QKT | A | GLY | 366 | T | -9.712736  | 12.802540 | -10.293891 | -3.468781 |
| 1QKT | A | PHE | 367 | G | -9.711935  | 13.116539 | -10.591680 | -3.799205 |
| 1QKT | A | VAL | 368 | G | -9.616456  | 12.556709 | -10.662011 | -3.636325 |



|      |   |     |     |   |            |           |            |           |
|------|---|-----|-----|---|------------|-----------|------------|-----------|
| 1QKT | A | ASP | 369 | G | -9.624535  | 12.424663 | -10.816400 | -3.707104 |
| 1QKT | A | LEU | 370 | C | -9.625086  | 12.397380 | -10.937879 | -3.778111 |
| 1QKT | A | THR | 371 | C | -10.252149 | 11.374774 | -11.968763 | -3.528770 |
| 1QKT | A | LEU | 372 | H | -10.405847 | 10.312556 | -11.861095 | -3.051589 |
| 1QKT | A | HIS | 373 | H | -10.999873 | 10.756197 | -13.400049 | -3.637880 |
| 1QKT | A | ASP | 374 | H | -11.283961 | 10.905336 | -14.112238 | -4.067162 |
| 1QKT | A | GLN | 375 | H | -11.985551 | 10.689624 | -15.565755 | -4.474508 |
| 1QKT | A | VAL | 376 | H | -12.689523 | 13.409183 | -15.234183 | -4.603098 |
| 1QKT | A | HIS | 377 | H | -13.222639 | 15.072274 | -14.760502 | -4.127785 |
| 1QKT | A | LEU | 378 | H | -13.133777 | 14.901140 | -14.152319 | -3.713408 |
| 1QKT | A | LEU | 379 | H | -13.101924 | 14.985922 | -14.081650 | -3.675236 |
| 1QKT | A | GLU | 380 | H | -13.045317 | 15.045661 | -14.112700 | -3.696750 |
| 1QKT | A | SER | 381 | H | -13.246243 | 14.713992 | -14.642395 | -3.854710 |
| 1QKT | A | ALA | 382 | H | -13.247297 | 16.447852 | -13.926838 | -4.006677 |
| 1QKT | A | TRP | 383 | H | -13.417793 | 17.862459 | -14.212066 | -4.627539 |
| 1QKT | A | LEU | 384 | H | -13.320006 | 17.636381 | -14.024665 | -4.486834 |
| 1QKT | A | GLU | 385 | H | -13.252012 | 18.057930 | -13.740333 | -4.489539 |
| 1QKT | A | ILE | 386 | H | -11.624803 | 16.470334 | -11.185862 | -3.995407 |
| 1QKT | A | LEU | 387 | H | -11.273570 | 16.281964 | -11.695906 | -4.407053 |
| 1QKT | A | MET | 388 | H | -11.178434 | 16.011437 | -11.512839 | -4.125859 |
| 1QKT | A | ILE | 389 | H | -11.148630 | 16.035319 | -11.418180 | -4.033421 |
| 1QKT | A | GLY | 390 | H | -11.152696 | 16.018234 | -11.407720 | -4.032416 |
| 1QKT | A | LEU | 391 | H | -11.479445 | 15.767164 | -11.681431 | -4.082165 |
| 1QKT | A | VAL | 392 | H | -12.106800 | 15.051935 | -10.379002 | -2.490877 |
| 1QKT | A | TRP | 393 | H | -12.842767 | 16.389785 | -10.236389 | -2.440861 |
| 1QKT | A | ARG | 394 | H | -14.477130 | 12.396154 | -17.465109 | -4.035738 |
| 1QKT | A | SER | 395 | H | -10.407851 | 7.975550  | -13.545613 | -3.811323 |
| 1QKT | A | MET | 396 | T | -8.061490  | 6.400044  | -9.792358  | -2.835024 |
| 1QKT | A | GLU | 397 | T | -6.274601  | 6.104935  | -7.341045  | -2.551440 |
| 1QKT | A | HIS | 398 | T | -6.259893  | 6.250883  | -7.384990  | -2.584842 |
| 1QKT | A | PRO | 399 | T | -6.258809  | 6.262012  | -7.387813  | -2.585076 |
| 1QKT | A | GLY | 400 | T | -6.259338  | 6.260659  | -7.382273  | -2.583983 |
| 1QKT | A | LYS | 401 | E | -6.287764  | 6.255326  | -7.267397  | -2.572574 |
| 1QKT | A | LEU | 402 | E | -8.412164  | 12.106734 | -9.121060  | -3.831533 |
| 1QKT | A | LEU | 403 | E | -9.959797  | 12.765502 | -8.987578  | -2.793641 |
| 1QKT | A | PHE | 404 | E | -11.596738 | 19.665152 | -9.927988  | -3.977705 |
| 1QKT | A | ALA | 405 | E | -10.417228 | 14.402298 | -9.695665  | -3.174985 |
| 1QKT | A | PRO | 406 | T | -10.309655 | 14.415262 | -9.942863  | -3.251236 |
| 1QKT | A | ASN | 407 | T | -10.352661 | 13.930159 | -10.014135 | -3.179832 |
| 1QKT | A | LEU | 408 | E | -10.359720 | 13.892481 | -9.992508  | -3.174623 |
| 1QKT | A | LEU | 409 | E | -10.365738 | 13.832283 | -10.012755 | -3.182543 |
| 1QKT | A | LEU | 410 | E | -11.327092 | 14.324349 | -11.531538 | -3.671037 |
| 1QKT | A | ASP | 411 | E | -11.662002 | 6.926859  | -16.935768 | -4.384150 |
| 1QKT | A | ARG | 412 | G | -10.651162 | 7.930601  | -15.934259 | -5.082413 |
| 1QKT | A | ASN | 413 | G | -9.786457  | 6.518391  | -14.990587 | -4.491991 |
| 1QKT | A | GLN | 414 | G | -9.727865  | 6.559521  | -14.840317 | -4.339061 |
| 1QKT | A | GLY | 415 | G | -7.347543  | 4.925383  | -10.217481 | -2.982541 |
| 1QKT | A | LYS | 416 | T | -6.394279  | 4.553877  | -10.023533 | -3.321994 |
| 1QKT | A | SER | 417 | T | -6.341804  | 4.792051  | -10.151879 | -3.433505 |
| 1QKT | A | VAL | 418 | T | -6.340600  | 4.806949  | -10.149249 | -3.432714 |
| 1QKT | A | GLU | 419 | T | -6.338083  | 4.812645  | -10.154484 | -3.429396 |
| 1QKT | A | GLY | 420 | T | -6.452461  | 4.816000  | -10.162640 | -3.532058 |
| 1QKT | A | MET | 421 | H | -7.721412  | 7.483320  | -11.565076 | -4.471390 |
| 1QKT | A | VAL | 422 | H | -8.955508  | 8.299312  | -11.568021 | -3.276063 |
| 1QKT | A | GLU | 423 | H | -9.216581  | 7.951056  | -11.354548 | -3.032423 |
| 1QKT | A | ILE | 424 | H | -9.739295  | 10.419267 | -11.115210 | -3.553134 |
| 1QKT | A | PHE | 425 | H | -12.360086 | 15.137120 | -13.821086 | -4.491243 |
| 1QKT | A | ASP | 426 | H | -12.514883 | 14.444768 | -14.421026 | -4.670257 |
| 1QKT | A | MET | 427 | H | -12.415645 | 15.482635 | -14.016759 | -4.921508 |
| 1QKT | A | LEU | 428 | H | -12.049875 | 14.715611 | -13.575129 | -4.382931 |
| 1QKT | A | LEU | 429 | H | -11.989034 | 14.068710 | -13.741452 | -4.208996 |
| 1QKT | A | ALA | 430 | H | -11.969839 | 13.866699 | -13.879801 | -4.192408 |
| 1QKT | A | THR | 431 | H | -11.994957 | 13.947967 | -13.784153 | -4.202847 |
| 1QKT | A | SER | 432 | H | -12.319240 | 12.569581 | -13.832327 | -3.571605 |
| 1QKT | A | SER | 433 | H | -13.169212 | 8.348720  | -15.972148 | -2.906341 |
| 1QKT | A | ARG | 434 | H | -13.963819 | 8.264606  | -18.065309 | -3.717603 |
| 1QKT | A | PHE | 435 | H | -15.428936 | 13.008630 | -18.860666 | -4.222162 |
| 1QKT | A | ARG | 436 | H | -14.800297 | 10.536700 | -19.508725 | -4.544014 |
| 1QKT | A | MET | 437 | H | -12.127173 | 9.821178  | -17.254111 | -5.692311 |
| 1QKT | A | MET | 438 | H | -11.754650 | 10.286194 | -16.628277 | -5.335989 |
| 1QKT | A | ASN | 439 | C | -10.052233 | 9.089873  | -11.675449 | -3.271286 |
| 1QKT | A | LEU | 440 | C | -10.036202 | 9.146486  | -11.758235 | -3.299417 |
| 1QKT | A | GLN | 441 | C | -10.030385 | 9.182760  | -11.792234 | -3.313590 |
| 1QKT | A | GLY | 442 | H | -10.007343 | 9.604527  | -11.727946 | -3.389873 |
| 1QKT | A | GLU | 443 | H | -10.021472 | 9.580787  | -11.625972 | -3.352561 |
| 1QKT | A | GLU | 444 | H | -11.359260 | 14.422695 | -13.748441 | -5.107775 |
| 1QKT | A | PHE | 445 | H | -11.528034 | 15.495493 | -13.406735 | -5.365146 |
| 1QKT | A | VAL | 446 | H | -11.598737 | 15.878307 | -13.159922 | -5.438764 |
| 1QKT | A | CYS | 447 | H | -13.032824 | 16.811578 | -14.778078 | -5.077533 |
| 1QKT | A | LEU | 448 | H | -12.934466 | 17.477156 | -14.126695 | -4.894318 |
| 1QKT | A | LYS | 449 | H | -12.823814 | 17.392617 | -13.666578 | -4.570375 |

|      |   |     |     |   |            |           |            |           |
|------|---|-----|-----|---|------------|-----------|------------|-----------|
| 1QKT | A | SER | 450 | H | -12.354558 | 17.876248 | -11.672658 | -3.729937 |
| 1QKT | A | ILE | 451 | H | -12.171211 | 17.956953 | -11.366438 | -3.607708 |
| 1QKT | A | ILE | 452 | H | -12.012911 | 17.756059 | -11.533938 | -3.814966 |
| 1QKT | A | LEU | 453 | H | -11.890314 | 16.700953 | -12.120298 | -3.884357 |
| 1QKT | A | LEU | 454 | H | -11.771425 | 15.510965 | -12.365519 | -3.699888 |
| 1QKT | A | ASN | 455 | H | -11.122676 | 10.364701 | -13.954419 | -3.846495 |
| 1QKT | A | SER | 456 | H | -10.303794 | 8.604472  | -13.697859 | -3.804124 |
| 1QKT | A | GLY | 457 | T | -9.826833  | 11.347705 | -12.566312 | -4.411225 |
| 1QKT | A | VAL | 458 | T | -9.220302  | 11.889240 | -10.776099 | -3.797089 |
| 1QKT | A | TYR | 459 | T | -8.938737  | 10.587072 | -10.536024 | -3.322000 |
| 1QKT | A | THR | 460 | T | -8.538040  | 8.744994  | -9.986744  | -2.657673 |
| 1QKT | A | PHE | 461 | T | -8.124318  | 7.832417  | -10.450091 | -2.946501 |
| 1QKT | A | LEU | 462 | C | -6.019534  | 3.223476  | -10.284119 | -3.639887 |
| 1QKT | A | SER | 463 | C | -5.988279  | 3.297695  | -10.325862 | -3.619865 |
| 1QKT | A | SER | 464 | C | -5.961545  | 3.355729  | -10.286803 | -3.559353 |
| 1QKT | A | THR | 465 | C | -5.960214  | 3.349020  | -10.307790 | -3.566348 |
| 1QKT | A | LEU | 466 | H | -5.962666  | 3.319823  | -10.318791 | -3.570548 |
| 1QKT | A | LYS | 467 | H | -7.234351  | 5.009338  | -10.618424 | -2.887258 |
| 1QKT | A | SER | 468 | H | -7.581501  | 4.976861  | -10.291151 | -2.590004 |
| 1QKT | A | LEU | 469 | H | -8.330870  | 5.378611  | -12.358914 | -3.419351 |
| 1QKT | A | GLU | 470 | H | -8.713416  | 5.543386  | -12.574532 | -3.609671 |
| 1QKT | A | GLU | 471 | H | -11.029014 | 8.893027  | -17.204084 | -6.030196 |
| 1QKT | A | LYS | 472 | H | -13.111607 | 10.801508 | -17.412375 | -4.482605 |
| 1QKT | A | ASP | 473 | H | -11.631503 | 12.405885 | -12.649752 | -3.448513 |
| 1QKT | A | HIS | 474 | H | -11.631154 | 12.550804 | -12.517227 | -3.408252 |
| 1QKT | A | ILE | 475 | H | -11.594692 | 12.718341 | -12.443359 | -3.346746 |
| 1QKT | A | HIS | 476 | H | -11.367505 | 12.126542 | -12.667722 | -3.231858 |
| 1QKT | A | ARG | 477 | H | -11.330247 | 12.108927 | -12.783303 | -3.279244 |
| 1QKT | A | VAL | 478 | H | -11.761090 | 11.883188 | -13.357528 | -3.189411 |
| 1QKT | A | LEU | 479 | H | -11.684459 | 11.785725 | -13.311379 | -3.134387 |
| 1QKT | A | ASP | 480 | H | -10.816025 | 9.280788  | -13.249257 | -3.259935 |
| 1QKT | A | LYS | 481 | H | -10.674133 | 9.801102  | -13.231120 | -3.488827 |
| 1QKT | A | ILE | 482 | H | -10.060285 | 12.931801 | -11.875582 | -4.334875 |
| 1QKT | A | THR | 483 | H | -9.930304  | 12.848809 | -11.811226 | -4.190993 |
| 1QKT | A | ASP | 484 | H | -9.927136  | 12.847080 | -11.809970 | -4.183411 |
| 1QKT | A | THR | 485 | H | -10.037197 | 13.742287 | -11.514685 | -4.363597 |
| 1QKT | A | LEU | 486 | H | -10.101622 | 14.020523 | -11.319827 | -4.411672 |
| 1QKT | A | ILE | 487 | H | -10.800074 | 12.663274 | -11.737687 | -3.558856 |
| 1QKT | A | HIS | 488 | H | -11.539231 | 12.230335 | -13.386096 | -3.577899 |
| 1QKT | A | LEU | 489 | H | -10.344265 | 9.263579  | -11.143008 | -2.510778 |
| 1QKT | A | MET | 490 | H | -8.823024  | 6.138740  | -11.825992 | -3.155675 |
| 1QKT | A | ALA | 491 | H | -6.451246  | 4.274500  | -9.559396  | -3.031866 |
| 1QKT | A | LYS | 492 | H | -6.289884  | 4.038840  | -9.484667  | -2.816902 |
| 1QKT | A | ALA | 493 | H | -6.117000  | 4.030404  | -9.739062  | -2.914293 |
| 1QKT | A | GLY | 494 | C | -6.111780  | 4.024038  | -9.759851  | -2.912551 |
| 1QKT | A | LEU | 495 | C | -6.115393  | 4.011085  | -9.751056  | -2.911271 |
| 1QKT | A | THR | 496 | C | -6.596874  | 3.727078  | -10.052205 | -2.764692 |
| 1QKT | A | LEU | 497 | H | -6.899355  | 4.024146  | -10.594969 | -3.189914 |
| 1QKT | A | Gln | 498 | H | -8.650344  | 4.342304  | -12.513705 | -2.979043 |
| 1QKT | A | Gln | 499 | H | -9.340127  | 5.710888  | -13.614585 | -3.618432 |
| 1QKT | A | Gln | 500 | H | -10.289052 | 6.785617  | -15.667072 | -4.629934 |
| 1QKT | A | HIS | 501 | H | -11.098612 | 8.140084  | -16.978908 | -5.636470 |
| 1QKT | A | Gln | 502 | H | -12.637610 | 9.784629  | -20.304111 | -7.002763 |
| 1QKT | A | ARG | 503 | H | -14.530863 | 11.789634 | -18.937889 | -4.776348 |
| 1QKT | A | LEU | 504 | H | -12.783771 | 12.851093 | -12.434604 | -2.671119 |
| 1QKT | A | ALA | 505 | H | -11.961229 | 11.115624 | -13.274079 | -3.028060 |
| 1QKT | A | Gln | 506 | H | -11.792531 | 11.618157 | -13.359304 | -3.208548 |
| 1QKT | A | LEU | 507 | H | -10.696152 | 14.811865 | -10.869729 | -3.899635 |
| 1QKT | A | LEU | 508 | H | -10.165371 | 12.667660 | -10.733681 | -3.194895 |
| 1QKT | A | LEU | 509 | H | -10.118287 | 12.395947 | -10.776603 | -3.089440 |
| 1QKT | A | ILE | 510 | H | -10.121183 | 12.491014 | -10.712970 | -3.083653 |
| 1QKT | A | LEU | 511 | H | -10.130017 | 12.481946 | -10.668643 | -3.073393 |
| 1QKT | A | SER | 512 | H | -10.360740 | 11.078782 | -10.810496 | -2.620386 |
| 1QKT | A | HIS | 513 | H | -11.385940 | 10.570613 | -11.608102 | -2.211817 |
| 1QKT | A | ILE | 514 | H | -12.180506 | 13.393868 | -12.224151 | -3.079965 |
| 1QKT | A | ARG | 515 | H | -13.532342 | 11.058281 | -17.826619 | -4.639586 |
| 1QKT | A | HIS | 516 | H | -12.502145 | 10.278376 | -17.051146 | -4.976201 |
| 1QKT | A | MET | 517 | H | -11.309041 | 11.517124 | -16.048711 | -6.063553 |
| 1QKT | A | SER | 518 | H | -10.964823 | 10.640761 | -15.743758 | -5.472588 |
| 1QKT | A | ASN | 519 | H | -10.075021 | 7.756458  | -13.433659 | -3.734421 |
| 1QKT | A | LYS | 520 | H | -10.049916 | 7.837359  | -13.504544 | -3.756082 |
| 1QKT | A | GLY | 521 | H | -10.043663 | 7.856320  | -13.512471 | -3.754002 |
| 1QKT | A | MET | 522 | H | -10.081269 | 7.527456  | -13.362741 | -3.542346 |
| 1QKT | A | GLU | 523 | H | -10.092360 | 7.381310  | -13.358417 | -3.474754 |
| 1QKT | A | HIS | 524 | H | -10.450301 | 8.057953  | -15.484336 | -4.514502 |
| 1QKT | A | LEU | 525 | H | -8.395444  | 6.029327  | -13.095620 | -4.437596 |
| 1QKT | A | TYR | 526 | H | -7.810894  | 5.529293  | -13.083269 | -4.431160 |
| 1QKT | A | SER | 527 | H | -6.802709  | 5.396119  | -11.379636 | -4.211616 |
| 1QKT | A | MET | 528 | H | -5.524913  | 5.000281  | -8.697430  | -3.366945 |
| 1QKT | A | LYS | 529 | C | -4.320895  | 1.870575  | -6.300767  | -1.748093 |
| 1QKT | A | SER | 530 | T | -3.455583  | 1.998876  | -5.761280  | -1.965629 |

|      |   |     |     |   |            |           |            |           |
|------|---|-----|-----|---|------------|-----------|------------|-----------|
| 1QKT | A | LYS | 531 | T | -3.320632  | 2.148222  | -5.988870  | -2.084363 |
| 1QKT | A | ASN | 532 | T | -3.319409  | 2.153449  | -5.981356  | -2.077249 |
| 1QKT | A | VAL | 533 | T | -3.332302  | 2.091659  | -5.928402  | -2.050978 |
| 1QKT | A | VAL | 534 | C | -3.438975  | 2.225989  | -5.919553  | -2.156455 |
| 1QKT | A | PRO | 535 | C | -4.253262  | 2.773550  | -6.856132  | -2.519227 |
| 1QKT | A | LEU | 536 | H | -6.540926  | 5.054865  | -6.909295  | -1.549185 |
| 1QKT | A | TYR | 537 | H | -9.820967  | 9.652122  | -11.183876 | -2.705270 |
| 1QKT | A | ASP | 538 | H | -9.795120  | 10.946129 | -11.000735 | -3.053141 |
| 1QKT | A | LEU | 539 | H | -9.739357  | 16.309401 | -10.718338 | -5.142481 |
| 1QKT | A | LEU | 540 | H | -9.299623  | 17.759764 | -10.511658 | -6.101886 |
| 1QKT | A | LEU | 541 | H | -7.497760  | 13.862030 | -9.271389  | -5.956541 |
| 1QKT | A | GLU | 542 | H | -6.176370  | 11.113695 | -8.176195  | -5.238930 |
| 1QKT | A | MET | 543 | H | -5.569252  | 10.527535 | -7.280589  | -4.673171 |
| 1QKT | A | LEU | 544 | H | -3.821428  | 6.242132  | -4.933124  | -3.155667 |
| 1QKT | A | ASP | 545 | C | -1.945978  | 1.842274  | -3.713663  | -2.229670 |
| 1QKT | A | ALA | 546 | C | -1.201060  | 0.935525  | -2.941052  | -1.607262 |
| 1QKT | A | HIS | 547 | C | 0.412747   | 0.669300  | -1.176982  | -1.694408 |
| 1QKT | A | ARG | 548 | C | 1.010464   | 2.192467  | -1.693306  | -2.717993 |
| 1QKT | A | LEU | 549 | C | 1.010464   | 2.192467  | -1.693306  | -2.717993 |
| 1QKT | A | HIS | 550 | C | 1.010464   | 2.192467  | -1.693306  | -2.717993 |
| 1QKT | A | ALA | 551 | C | 1.010464   | 2.192467  | -1.693306  | -2.717993 |
| 1QUU | A | GLY | 1   | C | -5.465931  | 2.874654  | -10.871034 | -3.990394 |
| 1QUU | A | SER | 2   | C | -5.465931  | 2.874654  | -10.871034 | -3.990394 |
| 1QUU | A | SER | 3   | C | -5.465931  | 2.874654  | -10.871034 | -3.990394 |
| 1QUU | A | ASN | 4   | H | -5.465931  | 2.874654  | -10.871034 | -3.990394 |
| 1QUU | A | GLU | 5   | H | -7.174833  | 3.529363  | -15.052288 | -5.397625 |
| 1QUU | A | ILE | 6   | H | -7.623163  | 3.779542  | -15.580663 | -5.699678 |
| 1QUU | A | ARG | 7   | H | -8.671454  | 4.637437  | -17.048164 | -6.162692 |
| 1QUU | A | ARG | 8   | H | -9.922880  | 6.281297  | -19.471641 | -7.084397 |
| 1QUU | A | LEU | 9   | H | -10.327936 | 6.671444  | -20.145998 | -7.499346 |
| 1QUU | A | GLU | 10  | H | -10.818485 | 7.259181  | -20.578518 | -7.841502 |
| 1QUU | A | ARG | 11  | H | -12.584261 | 10.248856 | -19.764090 | -5.979754 |
| 1QUU | A | LEU | 12  | H | -12.620765 | 11.728398 | -17.616861 | -4.935028 |
| 1QUU | A | GLU | 13  | H | -11.210017 | 9.718305  | -15.972592 | -4.942077 |
| 1QUU | A | HIS | 14  | H | -8.526925  | 10.365499 | -11.607821 | -4.689473 |
| 1QUU | A | LEU | 15  | H | -8.520921  | 10.430131 | -11.612705 | -4.693444 |
| 1QUU | A | ALA | 16  | H | -8.520678  | 10.431679 | -11.614214 | -4.693584 |
| 1QUU | A | GLU | 17  | H | -8.520345  | 10.432726 | -11.617110 | -4.694108 |
| 1QUU | A | LYS | 18  | H | -8.526121  | 10.442264 | -11.575990 | -4.691848 |
| 1QUU | A | PHE | 19  | H | -11.143019 | 16.153286 | -12.832751 | -5.112503 |
| 1QUU | A | ARG | 20  | H | -12.299979 | 12.994034 | -16.769133 | -5.314495 |
| 1QUU | A | GLN | 21  | H | -10.370062 | 8.355276  | -15.357225 | -4.889131 |
| 1QUU | A | LYS | 22  | H | -10.362457 | 8.384546  | -15.376445 | -4.896618 |
| 1QUU | A | ALA | 23  | H | -10.355756 | 8.389469  | -15.405519 | -4.896896 |
| 1QUU | A | SER | 24  | H | -10.169500 | 8.327433  | -15.596256 | -4.901521 |
| 1QUU | A | THR | 25  | H | -10.150361 | 8.463082  | -15.605933 | -4.918421 |
| 1QUU | A | HIS | 26  | H | -10.802550 | 8.989761  | -16.227779 | -5.017482 |
| 1QUU | A | GLU | 27  | H | -10.637142 | 9.535537  | -15.869710 | -4.988998 |
| 1QUU | A | THR | 28  | H | -8.928538  | 10.140024 | -12.416683 | -4.705592 |
| 1QUU | A | TRP | 29  | H | -8.928567  | 10.306714 | -12.346974 | -4.719716 |
| 1QUU | A | ALA | 30  | H | -8.919710  | 10.310293 | -12.405201 | -4.737659 |
| 1QUU | A | TYR | 31  | T | -8.900617  | 10.291126 | -12.533345 | -4.772959 |
| 1QUU | A | GLY | 32  | T | -8.876108  | 10.189063 | -12.694687 | -4.810498 |
| 1QUU | A | LYS | 33  | H | -10.060376 | 10.297068 | -15.750519 | -5.588415 |
| 1QUU | A | GLU | 34  | H | -10.130945 | 9.673330  | -16.093396 | -5.559252 |
| 1QUU | A | GLN | 35  | H | -9.556033  | 9.806165  | -14.126485 | -4.856308 |
| 1QUU | A | ILE | 36  | H | -9.102156  | 10.630859 | -12.934994 | -4.711877 |
| 1QUU | A | LEU | 37  | H | -8.892546  | 10.489278 | -13.003205 | -4.820865 |
| 1QUU | A | LEU | 38  | H | -8.871448  | 10.525357 | -13.071945 | -4.846050 |
| 1QUU | A | GLN | 39  | C | -8.865168  | 10.529714 | -13.112133 | -4.868669 |
| 1QUU | A | LYS | 40  | T | -8.994602  | 10.688468 | -13.135474 | -4.963747 |
| 1QUU | A | ASP | 41  | T | -9.377765  | 10.230336 | -13.979656 | -5.227400 |
| 1QUU | A | TYR | 42  | T | -10.327657 | 11.541610 | -15.384153 | -5.545289 |
| 1QUU | A | GLU | 43  | T | -10.190764 | 10.873075 | -14.758549 | -4.995225 |
| 1QUU | A | SER | 44  | T | -8.482253  | 8.799564  | -11.510917 | -3.929206 |
| 1QUU | A | ALA | 45  | T | -7.716360  | 8.376284  | -11.196720 | -4.027384 |
| 1QUU | A | SER | 46  | C | -7.168395  | 9.332767  | -10.207021 | -4.030419 |
| 1QUU | A | LEU | 47  | H | -7.163093  | 9.346334  | -10.230603 | -4.034727 |
| 1QUU | A | THR | 48  | H | -7.151232  | 9.321884  | -10.286019 | -4.038714 |
| 1QUU | A | GLU | 49  | H | -7.214114  | 9.392093  | -10.165552 | -4.055506 |
| 1QUU | A | VAL | 50  | H | -7.435378  | 9.920872  | -9.746827  | -4.049707 |
| 1QUU | A | ARG | 51  | H | -9.180901  | 9.156619  | -13.122439 | -4.347742 |
| 1QUU | A | ALA | 52  | H | -9.278735  | 8.694591  | -13.222125 | -4.232395 |
| 1QUU | A | LEU | 53  | H | -10.322174 | 10.175912 | -13.594356 | -4.039378 |
| 1QUU | A | LEU | 54  | H | -10.327780 | 10.051342 | -13.697607 | -4.073209 |
| 1QUU | A | ARG | 55  | H | -9.756987  | 8.309627  | -14.482947 | -4.371912 |
| 1QUU | A | LYS | 56  | H | -9.752355  | 8.339368  | -14.501223 | -4.382941 |
| 1QUU | A | HIS | 57  | H | -9.977855  | 7.642880  | -15.054420 | -4.591421 |
| 1QUU | A | GLU | 58  | H | -9.985687  | 7.565393  | -15.067940 | -4.593740 |
| 1QUU | A | ALA | 59  | H | -10.020799 | 7.391632  | -15.037636 | -4.577468 |
| 1QUU | A | PHE | 60  | H | -12.098155 | 11.431405 | -17.296223 | -5.292486 |

|      |   |     |     |   |            |           |            |           |
|------|---|-----|-----|---|------------|-----------|------------|-----------|
| 1QUU | A | GLU | 61  | H | -11.323365 | 8.631847  | -16.366024 | -4.603164 |
| 1QUU | A | SER | 62  | H | -9.995724  | 7.226909  | -14.554686 | -4.032206 |
| 1QUU | A | ASP | 63  | H | -9.776465  | 8.002442  | -14.424024 | -4.185729 |
| 1QUU | A | LEU | 64  | H | -9.765440  | 8.047837  | -14.452063 | -4.198108 |
| 1QUU | A | ALA | 65  | H | -9.683487  | 7.917824  | -14.758030 | -4.309312 |
| 1QUU | A | ALA | 66  | H | -9.713255  | 7.896095  | -14.702511 | -4.301804 |
| 1QUU | A | HIS | 67  | H | -10.192416 | 8.935416  | -15.157652 | -4.721882 |
| 1QUU | A | GLN | 68  | H | -10.753482 | 7.546543  | -16.923811 | -5.037412 |
| 1QUU | A | ASP | 69  | H | -10.637246 | 7.579487  | -16.899213 | -5.053780 |
| 1QUU | A | ARG | 70  | H | -11.235703 | 8.671301  | -17.034668 | -5.045950 |
| 1QUU | A | VAL | 71  | H | -11.231933 | 8.882673  | -16.896561 | -5.022576 |
| 1QUU | A | GLU | 72  | H | -10.895920 | 8.884767  | -16.647137 | -4.992908 |
| 1QUU | A | GLN | 73  | H | -10.763236 | 9.615963  | -16.092625 | -4.911117 |
| 1QUU | A | ILE | 74  | H | -10.587628 | 11.521143 | -14.066174 | -4.358160 |
| 1QUU | A | ALA | 75  | H | -10.110361 | 10.181771 | -13.950980 | -4.187290 |
| 1QUU | A | ALA | 76  | H | -9.987149  | 10.135886 | -14.071745 | -4.253518 |
| 1QUU | A | ILE | 77  | H | -10.035855 | 10.331913 | -13.848026 | -4.190470 |
| 1QUU | A | ALA | 78  | H | -10.079932 | 10.241057 | -13.781525 | -4.155436 |
| 1QUU | A | GLN | 79  | H | -10.123769 | 9.551451  | -14.471870 | -4.391620 |
| 1QUU | A | GLU | 80  | H | -10.567369 | 10.189626 | -15.368746 | -4.880787 |
| 1QUU | A | LEU | 81  | H | -9.612372  | 9.271779  | -14.095198 | -4.891287 |
| 1QUU | A | ASN | 82  | H | -9.505752  | 9.541228  | -14.187039 | -4.970002 |
| 1QUU | A | GLU | 83  | H | -9.091099  | 10.068947 | -13.668821 | -5.012508 |
| 1QUU | A | LEU | 84  | H | -8.952089  | 10.171391 | -13.636818 | -5.038530 |
| 1QUU | A | ASP | 85  | C | -8.711085  | 9.896768  | -13.554045 | -4.991406 |
| 1QUU | A | TYR | 86  | C | -8.615752  | 9.706337  | -13.416396 | -4.912379 |
| 1QUU | A | HIS | 87  | C | -6.175907  | 4.665342  | -11.104014 | -4.296244 |
| 1QUU | A | ASP | 88  | H | -6.045243  | 5.075619  | -11.016986 | -4.253258 |
| 1QUU | A | ALA | 89  | H | -6.041062  | 5.084291  | -11.030720 | -4.251734 |
| 1QUU | A | VAL | 90  | H | -5.984493  | 5.166320  | -11.116700 | -4.268283 |
| 1QUU | A | ASN | 91  | H | -5.986661  | 5.152661  | -11.109002 | -4.266861 |
| 1QUU | A | VAL | 92  | H | -6.730828  | 6.575487  | -11.211441 | -4.216774 |
| 1QUU | A | ASN | 93  | H | -7.334227  | 6.187737  | -12.116204 | -4.435599 |
| 1QUU | A | ASP | 94  | H | -7.381873  | 6.109688  | -12.032787 | -4.451117 |
| 1QUU | A | ARG | 95  | H | -11.363235 | 8.957019  | -17.506887 | -5.366385 |
| 1QUU | A | CYS | 96  | H | -11.265398 | 9.107709  | -17.051779 | -5.228692 |
| 1QUU | A | GLN | 97  | H | -10.579363 | 8.563224  | -16.202999 | -5.025925 |
| 1QUU | A | LYS | 98  | H | -10.586342 | 8.597646  | -16.148571 | -5.013716 |
| 1QUU | A | ILE | 99  | H | -10.604130 | 8.632443  | -16.041658 | -4.994519 |
| 1QUU | A | CYS | 100 | H | -10.605287 | 8.628439  | -16.036171 | -4.993677 |
| 1QUU | A | ASP | 101 | H | -10.779998 | 8.385197  | -15.932016 | -4.956329 |
| 1QUU | A | GLN | 102 | H | -13.100149 | 10.021257 | -19.315785 | -5.632861 |
| 1QUU | A | TRP | 103 | H | -12.915541 | 12.191771 | -17.160793 | -5.103859 |
| 1QUU | A | ASP | 104 | H | -9.521633  | 8.636608  | -13.596080 | -4.554264 |
| 1QUU | A | ARG | 105 | H | -9.337209  | 9.444713  | -13.368616 | -4.553150 |
| 1QUU | A | LEU | 106 | H | -9.103528  | 10.825769 | -12.822479 | -4.669348 |
| 1QUU | A | GLY | 107 | H | -8.905540  | 10.380025 | -13.219333 | -4.813463 |
| 1QUU | A | THR | 108 | H | -8.865903  | 10.366986 | -13.312719 | -4.832340 |
| 1QUU | A | LEU | 109 | H | -9.102776  | 11.223301 | -13.179298 | -4.969930 |
| 1QUU | A | THR | 110 | H | -9.220512  | 11.127996 | -13.273298 | -5.061998 |
| 1QUU | A | GLN | 111 | H | -9.520330  | 9.445868  | -14.313499 | -5.162289 |
| 1QUU | A | LYS | 112 | H | -10.479305 | 10.211084 | -14.693173 | -5.104078 |
| 1QUU | A | ARG | 113 | H | -15.212277 | 12.981560 | -21.028488 | -6.008234 |
| 1QUU | A | ARG | 114 | H | -14.143502 | 12.317478 | -19.049568 | -5.575466 |
| 1QUU | A | GLU | 115 | H | -11.202279 | 11.575582 | -14.586449 | -4.829027 |
| 1QUU | A | ALA | 116 | H | -11.047271 | 12.357320 | -14.419372 | -4.861858 |
| 1QUU | A | LEU | 117 | H | -11.025551 | 12.493708 | -14.455140 | -4.887714 |
| 1QUU | A | GLU | 118 | H | -10.603011 | 12.021268 | -14.732261 | -5.136185 |
| 1QUU | A | ARG | 119 | H | -10.503585 | 12.121219 | -14.729445 | -5.121122 |
| 1QUU | A | MET | 120 | H | -10.701914 | 12.437315 | -14.825572 | -5.253481 |
| 1QUU | A | GLU | 121 | H | -10.771041 | 12.067917 | -15.014959 | -5.296317 |
| 1QUU | A | LYS | 122 | H | -10.428798 | 12.018103 | -14.519918 | -5.094340 |
| 1QUU | A | LEU | 123 | H | -10.627123 | 12.581058 | -14.167948 | -4.904948 |
| 1QUU | A | LEU | 124 | H | -10.732347 | 12.593554 | -14.091973 | -4.881466 |
| 1QUU | A | GLU | 125 | H | -10.655617 | 12.210180 | -14.384950 | -4.909028 |
| 1QUU | A | THR | 126 | H | -10.481384 | 12.296673 | -14.277029 | -4.881581 |
| 1QUU | A | ILE | 127 | H | -10.879181 | 12.525914 | -14.633182 | -4.905557 |
| 1QUU | A | ASP | 128 | H | -11.006890 | 12.029410 | -14.888957 | -4.936071 |
| 1QUU | A | GLN | 129 | H | -10.839045 | 11.873441 | -14.922158 | -4.939636 |
| 1QUU | A | LEU | 130 | H | -10.970989 | 12.258765 | -14.572783 | -4.889064 |
| 1QUU | A | HIS | 131 | H | -11.525080 | 11.864181 | -15.298764 | -4.987304 |
| 1QUU | A | LEU | 132 | H | -10.557897 | 13.083838 | -13.320001 | -4.820771 |
| 1QUU | A | GLU | 133 | H | -10.550079 | 13.109755 | -13.342557 | -4.826484 |
| 1QUU | A | PHE | 134 | H | -10.662807 | 13.420790 | -12.969691 | -4.794072 |
| 1QUU | A | ALA | 135 | H | -10.273173 | 11.623703 | -13.574545 | -4.560247 |
| 1QUU | A | LYS | 136 | H | -9.874827  | 9.736638  | -14.051595 | -4.375364 |
| 1QUU | A | ARG | 137 | H | -10.041669 | 8.555263  | -14.465519 | -4.240957 |
| 1QUU | A | ALA | 138 | H | -10.022522 | 8.687297  | -14.450937 | -4.245214 |
| 1QUU | A | ALA | 139 | H | -9.818699  | 9.340947  | -14.273693 | -4.373829 |
| 1QUU | A | PRO | 140 | H | -9.949753  | 9.439743  | -14.272987 | -4.416529 |
| 1QUU | A | PHE | 141 | H | -10.428358 | 11.547641 | -13.932612 | -4.713254 |

|      |   |     |     |   |            |           |            |           |
|------|---|-----|-----|---|------------|-----------|------------|-----------|
| 1QUU | A | ASN | 142 | H | -10.441442 | 11.496777 | -13.925769 | -4.721517 |
| 1QUU | A | ASN | 143 | H | -10.063286 | 11.470156 | -14.212146 | -5.154431 |
| 1QUU | A | TRP | 144 | H | -10.196151 | 12.282811 | -14.326027 | -5.460500 |
| 1QUU | A | MET | 145 | H | -10.059683 | 11.914330 | -14.558738 | -5.489229 |
| 1QUU | A | GLU | 146 | H | -9.457517  | 9.668759  | -14.703158 | -5.288829 |
| 1QUU | A | GLY | 147 | H | -8.804116  | 8.258347  | -14.205164 | -5.019979 |
| 1QUU | A | ALA | 148 | H | -8.823730  | 8.164663  | -14.178462 | -4.982410 |
| 1QUU | A | MET | 149 | H | -8.789218  | 8.315691  | -14.168198 | -4.998427 |
| 1QUU | A | GLU | 150 | H | -8.344781  | 8.137715  | -13.663171 | -4.903451 |
| 1QUU | A | ASP | 151 | G | -8.070143  | 8.022738  | -13.326539 | -4.839170 |
| 1QUU | A | LEU | 152 | G | -8.047115  | 9.144210  | -12.791272 | -4.897236 |
| 1QUU | A | GLN | 153 | G | -6.271148  | 8.013010  | -9.955914  | -4.586611 |
| 1QUU | A | ASP | 154 | C | -5.213090  | 9.087160  | -7.809351  | -4.276851 |
| 1QUU | A | MET | 155 | C | -4.122635  | 9.061075  | -6.155306  | -4.057177 |
| 1QUU | A | PHE | 156 | C | -4.121638  | 9.064528  | -6.160962  | -4.057862 |
| 1QUU | A | ILE | 157 | C | -4.118482  | 9.050124  | -6.185878  | -4.057107 |
| 1QUU | A | VAL | 158 | C | -4.131954  | 9.073331  | -6.107449  | -4.044820 |
| 1QUU | A | HIS | 159 | C | -4.212104  | 8.999917  | -5.966225  | -4.022804 |
| 1QUU | A | SER | 160 | T | -6.475842  | 6.642339  | -11.537852 | -4.391890 |
| 1QUU | A | ILE | 161 | T | -6.516102  | 6.381960  | -11.687988 | -4.406717 |
| 1QUU | A | GLU | 162 | T | -6.725261  | 6.365814  | -12.087984 | -4.623322 |
| 1QUU | A | GLU | 163 | H | -6.870819  | 6.086605  | -12.202229 | -4.669523 |
| 1QUU | A | ILE | 164 | H | -7.841430  | 10.080546 | -12.036854 | -4.956396 |
| 1QUU | A | GLN | 165 | H | -7.966192  | 10.107203 | -11.956812 | -4.918502 |
| 1QUU | A | SER | 166 | H | -8.250820  | 9.311188  | -12.164346 | -4.350701 |
| 1QUU | A | LEU | 167 | H | -8.560400  | 8.963234  | -11.906703 | -3.895031 |
| 1QUU | A | ILE | 168 | H | -8.490270  | 8.946902  | -12.099145 | -3.970937 |
| 1QUU | A | THR | 169 | H | -8.383053  | 8.594575  | -12.495076 | -4.097783 |
| 1QUU | A | ALA | 170 | H | -8.473082  | 8.520171  | -12.471098 | -4.102808 |
| 1QUU | A | HIS | 171 | H | -9.074915  | 8.296129  | -14.100586 | -4.664377 |
| 1QUU | A | GLU | 172 | H | -8.822771  | 9.297361  | -13.463632 | -4.743673 |
| 1QUU | A | GLN | 173 | H | -8.400853  | 11.503554 | -11.655382 | -4.770684 |
| 1QUU | A | PHE | 174 | H | -8.411363  | 12.874721 | -10.895755 | -4.739487 |
| 1QUU | A | LYS | 175 | H | -7.647589  | 10.602798 | -10.430403 | -4.286007 |
| 1QUU | A | ALA | 176 | H | -6.739503  | 8.266588  | -9.713510  | -3.769526 |
| 1QUU | A | THR | 177 | H | -6.640758  | 8.455380  | -9.680677  | -3.752167 |
| 1QUU | A | LEU | 178 | H | -6.646762  | 8.341413  | -9.694912  | -3.726653 |
| 1QUU | A | PRO | 179 | H | -6.512371  | 7.756601  | -10.216157 | -3.860510 |
| 1QUU | A | GLU | 180 | H | -6.573699  | 7.514698  | -10.256166 | -3.843310 |
| 1QUU | A | ALA | 181 | H | -7.106038  | 7.354517  | -11.331541 | -4.157119 |
| 1QUU | A | ASP | 182 | H | -7.369146  | 6.096504  | -12.257844 | -4.396755 |
| 1QUU | A | GLY | 183 | H | -7.414099  | 5.815613  | -12.308006 | -4.423489 |
| 1QUU | A | GLU | 184 | H | -9.332174  | 7.086595  | -15.059176 | -5.240852 |
| 1QUU | A | ARG | 185 | H | -12.711551 | 8.847632  | -20.296963 | -5.951582 |
| 1QUU | A | GLN | 186 | H | -11.455460 | 9.568552  | -16.529006 | -5.042244 |
| 1QUU | A | SER | 187 | H | -11.187902 | 10.548466 | -15.802538 | -4.924978 |
| 1QUU | A | ILE | 188 | H | -11.187397 | 10.661380 | -15.734105 | -4.916995 |
| 1QUU | A | MET | 189 | H | -11.136003 | 10.559981 | -15.950053 | -4.965294 |
| 1QUU | A | ALA | 190 | H | -10.892073 | 9.901509  | -16.282844 | -5.032112 |
| 1QUU | A | ILE | 191 | H | -11.104306 | 10.129746 | -16.421621 | -5.093288 |
| 1QUU | A | GLN | 192 | H | -10.987968 | 9.577213  | -16.894303 | -5.380268 |
| 1QUU | A | ASN | 193 | H | -9.718610  | 8.867776  | -14.758136 | -5.082840 |
| 1QUU | A | GLU | 194 | H | -9.162304  | 10.377372 | -13.300553 | -4.913123 |
| 1QUU | A | VAL | 195 | H | -9.131380  | 10.595480 | -13.214516 | -4.895658 |
| 1QUU | A | GLU | 196 | H | -9.050318  | 10.681248 | -13.250937 | -4.891639 |
| 1QUU | A | LYS | 197 | H | -8.970050  | 10.575521 | -13.207768 | -4.787337 |
| 1QUU | A | VAL | 198 | H | -9.137939  | 11.185718 | -12.793636 | -4.702911 |
| 1QUU | A | ILE | 199 | H | -9.661103  | 10.972881 | -13.371667 | -4.556045 |
| 1QUU | A | GLN | 200 | H | -9.707565  | 10.327757 | -13.741476 | -4.576494 |
| 1QUU | A | SER | 201 | H | -8.437519  | 7.737498  | -12.373805 | -4.159621 |
| 1QUU | A | TYR | 202 | H | -7.417181  | 8.831150  | -10.357151 | -3.962196 |
| 1QUU | A | ASN | 203 | T | -5.886758  | 5.478411  | -9.303653  | -3.401036 |
| 1QUU | A | ILE | 204 | T | -5.831443  | 5.546168  | -9.408978  | -3.403652 |
| 1QUU | A | ARG | 205 | T | -5.819420  | 5.549298  | -9.459215  | -3.404986 |
| 1QUU | A | ILE | 206 | T | -5.825833  | 5.527004  | -9.430097  | -3.397134 |
| 1QUU | A | SER | 207 | C | -5.859245  | 5.315522  | -9.408567  | -3.367632 |
| 1QUU | A | SER | 208 | C | -7.125588  | 6.162080  | -10.859661 | -3.467572 |
| 1QUU | A | SER | 209 | C | -7.967958  | 6.409862  | -12.370988 | -3.783848 |
| 1QUU | A | ASN | 210 | T | -7.606857  | 9.404361  | -11.317838 | -4.713971 |
| 1QUU | A | PRO | 211 | T | -7.209899  | 9.704599  | -10.614076 | -4.446113 |
| 1QUU | A | TYR | 212 | T | -7.182214  | 9.815987  | -10.604077 | -4.449825 |
| 1QUU | A | SER | 213 | T | -7.128673  | 9.828313  | -10.710215 | -4.480007 |
| 1QUU | A | THR | 214 | T | -7.002927  | 9.636188  | -10.852260 | -4.535940 |
| 1QUU | A | VAL | 215 | T | -7.210625  | 9.677950  | -10.881131 | -4.473645 |
| 1QUU | A | THR | 216 | T | -7.557823  | 9.602166  | -11.837248 | -4.818900 |
| 1QUU | A | MET | 217 | H | -7.632738  | 9.489357  | -11.872856 | -4.863891 |
| 1QUU | A | ASP | 218 | H | -7.765177  | 9.395303  | -11.877883 | -4.882559 |
| 1QUU | A | GLU | 219 | H | -8.688363  | 11.099574 | -12.807972 | -5.249124 |
| 1QUU | A | LEU | 220 | H | -8.908635  | 11.887379 | -12.377792 | -5.305747 |
| 1QUU | A | ARG | 221 | H | -10.145684 | 11.367992 | -14.302143 | -5.274738 |
| 1QUU | A | THR | 222 | H | -10.212790 | 11.158458 | -14.277358 | -5.231808 |

|      |   |     |     |   |            |           |            |           |
|------|---|-----|-----|---|------------|-----------|------------|-----------|
| 1QUU | A | LYS | 223 | H | -11.768726 | 13.202708 | -16.661730 | -5.972387 |
| 1QUU | A | TRP | 224 | H | -10.573290 | 13.678579 | -13.273595 | -5.109458 |
| 1QUU | A | ASP | 225 | H | -8.830338  | 10.059289 | -12.243435 | -4.657886 |
| 1QUU | A | LYS | 226 | H | -8.670736  | 10.753428 | -12.036133 | -4.650464 |
| 1QUU | A | VAL | 227 | H | -8.627392  | 11.034672 | -11.936592 | -4.617889 |
| 1QUU | A | LYS | 228 | H | -8.449974  | 11.155125 | -11.788569 | -4.530224 |
| 1QUU | A | GLN | 229 | H | -8.283529  | 10.757986 | -11.689549 | -4.348391 |
| 1QUU | A | LEU | 230 | H | -8.562224  | 11.303889 | -11.395937 | -4.176998 |
| 1QUU | A | VAL | 231 | H | -8.691729  | 10.886974 | -11.404970 | -4.066259 |
| 1QUU | A | PRO | 232 | H | -8.741786  | 10.546815 | -11.460716 | -4.049481 |
| 1QUU | A | ILE | 233 | H | -9.068039  | 9.845785  | -11.532124 | -3.880798 |
| 1QUU | A | ARG | 234 | H | -11.914606 | 11.217787 | -16.058290 | -4.491215 |
| 1QUU | A | ASP | 235 | H | -12.051196 | 10.030220 | -17.452582 | -4.897527 |
| 1QUU | A | GLN | 236 | H | -10.492257 | 10.105087 | -14.587525 | -4.817494 |
| 1QUU | A | SER | 237 | H | -10.475353 | 10.235076 | -14.600745 | -4.845057 |
| 1QUU | A | LEU | 238 | H | -10.444927 | 10.395682 | -14.686141 | -4.895288 |
| 1QUU | A | GLN | 239 | H | -9.635002  | 9.024577  | -14.669306 | -5.030456 |
| 1QUU | A | GLU | 240 | H | -9.386005  | 9.310867  | -14.969541 | -5.276373 |
| 1QUU | A | GLU | 241 | H | -8.801131  | 10.486407 | -14.933526 | -6.518096 |
| 1QUU | A | LEU | 242 | H | -7.579978  | 8.407646  | -13.339150 | -5.919778 |
| 1QUU | A | ALA | 243 | H | -6.712161  | 7.119585  | -12.232966 | -5.310211 |
| 1QUU | A | ARG | 244 | H | -6.075678  | 6.653367  | -11.150469 | -4.798252 |
| 1QUU | A | GLN | 245 | H | -5.379146  | 6.325115  | -9.868039  | -4.348108 |
| 1QUU | A | HIS | 246 | H | -5.379146  | 6.325115  | -9.868039  | -4.348108 |
| 1QUU | A | ALA | 247 | C | -5.379146  | 6.325115  | -9.868039  | -4.348108 |
| 1QUU | A | ASN | 248 | C | -5.379146  | 6.325115  | -9.868039  | -4.348108 |
| 1RBP | A | GLU | 1   | C | -3.795231  | 2.529654  | -8.549897  | -3.792688 |
| 1RBP | A | ARG | 2   | C | -3.795231  | 2.529654  | -8.549897  | -3.792688 |
| 1RBP | A | ASP | 3   | C | -3.795231  | 2.529654  | -8.549897  | -3.792688 |
| 1RBP | A | CYS | 4   | C | -3.795231  | 2.529654  | -8.549897  | -3.792688 |
| 1RBP | A | ARG | 5   | C | -5.694797  | 4.903843  | -10.952826 | -4.766194 |
| 1RBP | A | VAL | 6   | G | -7.870646  | 8.238193  | -13.024129 | -5.508473 |
| 1RBP | A | SER | 7   | G | -9.803745  | 9.282788  | -16.096928 | -5.864030 |
| 1RBP | A | SER | 8   | G | -10.296714 | 9.798458  | -16.077730 | -5.650767 |
| 1RBP | A | PHE | 9   | C | -10.858680 | 11.340984 | -13.956335 | -4.098172 |
| 1RBP | A | ARG | 10  | C | -8.678799  | 8.828245  | -12.268554 | -4.392300 |
| 1RBP | A | VAL | 11  | C | -8.654539  | 9.051069  | -12.281220 | -4.428913 |
| 1RBP | A | LYS | 12  | T | -8.654813  | 9.067104  | -12.309997 | -4.458626 |
| 1RBP | A | GLU | 13  | T | -8.651263  | 9.086427  | -12.332239 | -4.467329 |
| 1RBP | A | ASN | 14  | T | -8.618800  | 9.310147  | -12.366896 | -4.508941 |
| 1RBP | A | PHE | 15  | T | -9.863784  | 13.349840 | -13.443928 | -5.308986 |
| 1RBP | A | ASP | 16  | T | -10.102741 | 12.953905 | -13.812972 | -5.362920 |
| 1RBP | A | LYS | 17  | T | -10.235604 | 13.199090 | -13.456811 | -5.282002 |
| 1RBP | A | ALA | 18  | T | -10.272453 | 13.233479 | -13.284541 | -5.210735 |
| 1RBP | A | ARG | 19  | T | -11.576094 | 12.852200 | -15.355055 | -5.034884 |
| 1RBP | A | PHE | 20  | T | -12.109354 | 12.603929 | -15.949710 | -4.949863 |
| 1RBP | A | SER | 21  | T | -12.247426 | 12.117718 | -16.056544 | -4.897697 |
| 1RBP | A | GLY | 22  | E | -12.172880 | 12.738531 | -15.855930 | -4.930618 |
| 1RBP | A | THR | 23  | E | -13.068687 | 16.344124 | -15.880899 | -5.319566 |
| 1RBP | A | TRP | 24  | E | -13.143297 | 17.103018 | -15.424239 | -5.307766 |
| 1RBP | A | TYR | 25  | E | -13.172215 | 17.188428 | -15.307744 | -5.277518 |
| 1RBP | A | ALA | 26  | E | -13.225399 | 17.250463 | -15.182859 | -5.254019 |
| 1RBP | A | MET | 27  | E | -14.149703 | 17.334477 | -17.594271 | -5.679795 |
| 1RBP | A | ALA | 28  | E | -13.023822 | 14.083280 | -16.760949 | -5.435020 |
| 1RBP | A | LYS | 29  | E | -12.553909 | 12.574518 | -17.372109 | -5.574139 |
| 1RBP | A | LYS | 30  | E | -9.244179  | 7.767155  | -14.527883 | -5.208524 |
| 1RBP | A | ASP | 31  | C | -7.885300  | 7.584731  | -12.412076 | -4.680983 |
| 1RBP | A | PRO | 32  | C | -7.636980  | 9.074360  | -11.713377 | -4.674668 |
| 1RBP | A | GLU | 33  | C | -7.439597  | 10.405457 | -11.052725 | -4.697185 |
| 1RBP | A | GLY | 34  | C | -7.438631  | 10.414013 | -11.055748 | -4.698239 |
| 1RBP | A | LEU | 35  | C | -7.467340  | 10.546347 | -10.883895 | -4.672973 |
| 1RBP | A | PHE | 36  | C | -7.815182  | 12.928223 | -9.852897  | -4.713852 |
| 1RBP | A | LEU | 37  | C | -8.183025  | 13.782349 | -9.406763  | -4.758003 |
| 1RBP | A | GLN | 38  | C | -11.202868 | 15.420881 | -13.226881 | -5.366990 |
| 1RBP | A | ASP | 39  | E | -13.154150 | 14.182546 | -16.556205 | -5.109244 |
| 1RBP | A | ASN | 40  | E | -12.549193 | 13.491062 | -15.972877 | -4.921492 |
| 1RBP | A | ILE | 41  | E | -12.338624 | 14.815274 | -15.089017 | -4.771608 |
| 1RBP | A | VAL | 42  | E | -12.261802 | 14.809358 | -15.094304 | -4.726744 |
| 1RBP | A | ALA | 43  | E | -12.158524 | 14.849032 | -15.028633 | -4.684154 |
| 1RBP | A | GLU | 44  | E | -12.095610 | 14.573348 | -15.142792 | -4.716346 |
| 1RBP | A | PHE | 45  | E | -10.038588 | 11.946569 | -12.782006 | -4.702688 |
| 1RBP | A | SER | 46  | E | -5.669763  | 5.291970  | -9.865474  | -4.176174 |
| 1RBP | A | VAL | 47  | E | -3.240189  | 3.617807  | -7.783900  | -4.243810 |
| 1RBP | A | ASP | 48  | T | -3.216196  | 3.576298  | -7.926577  | -4.263909 |
| 1RBP | A | GLU | 49  | T | -3.216086  | 3.576995  | -7.927688  | -4.264137 |
| 1RBP | A | THR | 50  | T | -3.216091  | 3.576923  | -7.927656  | -4.264135 |
| 1RBP | A | GLY | 51  | T | -3.225665  | 3.548555  | -7.895012  | -4.264976 |
| 1RBP | A | GLN | 52  | C | -5.130186  | 2.564018  | -11.325730 | -4.718139 |
| 1RBP | A | MET | 53  | E | -8.306061  | 7.336460  | -13.890250 | -5.459162 |
| 1RBP | A | SER | 54  | E | -10.843957 | 9.677986  | -16.564818 | -5.422762 |
| 1RBP | A | ALA | 55  | E | -10.666317 | 10.695708 | -14.568254 | -4.577874 |

|      |   |     |     |   |            |           |            |           |
|------|---|-----|-----|---|------------|-----------|------------|-----------|
| 1RBP | A | THR | 56  | E | -10.683187 | 10.647922 | -14.412572 | -4.492548 |
| 1RBP | A | ALA | 57  | E | -10.685714 | 10.639665 | -14.391400 | -4.484797 |
| 1RBP | A | LYS | 58  | E | -10.729650 | 10.482657 | -14.344617 | -4.475792 |
| 1RBP | A | GLY | 59  | E | -10.803487 | 10.405076 | -14.215813 | -4.479234 |
| 1RBP | A | ARG | 60  | E | -13.761520 | 12.642416 | -19.334617 | -5.643850 |
| 1RBP | A | VAL | 61  | E | -10.328967 | 10.770340 | -13.327815 | -4.407616 |
| 1RBP | A | ARG | 62  | E | -7.411925  | 7.619272  | -11.350399 | -4.491064 |
| 1RBP | A | LEU | 63  | E | -5.705067  | 7.350834  | -9.375476  | -4.473346 |
| 1RBP | A | LEU | 64  | T | -5.626514  | 7.195915  | -9.699045  | -4.533626 |
| 1RBP | A | ASN | 65  | T | -5.625290  | 7.198096  | -9.708019  | -4.534600 |
| 1RBP | A | ASN | 66  | T | -5.625423  | 7.197093  | -9.707581  | -4.534748 |
| 1RBP | A | TRP | 67  | E | -5.654896  | 7.177102  | -9.624987  | -4.536941 |
| 1RBP | A | ASP | 68  | E | -6.849678  | 6.156247  | -12.027691 | -4.958103 |
| 1RBP | A | VAL | 69  | E | -9.096377  | 8.777710  | -14.162021 | -4.939733 |
| 1RBP | A | CYS | 70  | E | -9.826974  | 10.259642 | -14.463077 | -4.768952 |
| 1RBP | A | ALA | 71  | E | -9.884278  | 10.619966 | -14.139131 | -4.666548 |
| 1RBP | A | ASP | 72  | E | -9.955254  | 10.916805 | -14.073150 | -4.713248 |
| 1RBP | A | MET | 73  | E | -10.426457 | 12.597355 | -14.024962 | -4.804215 |
| 1RBP | A | VAL | 74  | E | -10.175746 | 13.306307 | -13.092661 | -4.780775 |
| 1RBP | A | GLY | 75  | E | -9.484057  | 12.225537 | -12.894713 | -5.034185 |
| 1RBP | A | THR | 76  | E | -9.248592  | 12.146047 | -12.864457 | -5.062111 |
| 1RBP | A | PHE | 77  | E | -8.014813  | 10.499333 | -11.419860 | -4.857020 |
| 1RBP | A | THR | 78  | E | -6.494976  | 6.917085  | -11.229393 | -4.891377 |
| 1RBP | A | ASP | 79  | E | -6.381160  | 6.744627  | -11.427452 | -4.849885 |
| 1RBP | A | THR | 80  | T | -6.207881  | 6.963448  | -11.151938 | -4.677370 |
| 1RBP | A | GLU | 81  | T | -6.206395  | 6.966275  | -11.155266 | -4.675705 |
| 1RBP | A | ASP | 82  | T | -6.231526  | 6.822974  | -11.152098 | -4.669042 |
| 1RBP | A | PRO | 83  | T | -6.762369  | 7.118384  | -11.062564 | -4.342439 |
| 1RBP | A | ALA | 84  | T | -7.003682  | 7.693072  | -10.409180 | -4.185710 |
| 1RBP | A | LYS | 85  | E | -9.394674  | 9.900613  | -12.672023 | -4.501337 |
| 1RBP | A | PHE | 86  | E | -12.726749 | 15.891144 | -14.700160 | -4.933353 |
| 1RBP | A | LYS | 87  | E | -14.063150 | 17.530920 | -16.786648 | -5.649881 |
| 1RBP | A | MET | 88  | E | -13.681188 | 15.595027 | -17.057020 | -5.745163 |
| 1RBP | A | LYS | 89  | E | -11.310999 | 14.045443 | -13.779621 | -5.099448 |
| 1RBP | A | TYR | 90  | E | -10.017954 | 14.868278 | -11.620162 | -4.884282 |
| 1RBP | A | TRP | 91  | E | -6.873014  | 10.301262 | -8.554633  | -3.986920 |
| 1RBP | A | GLY | 92  | E | -5.483103  | 8.605516  | -7.617581  | -3.766017 |
| 1RBP | A | VAL | 93  | T | -5.371450  | 8.987243  | -7.516538  | -3.719114 |
| 1RBP | A | ALA | 94  | T | -5.371144  | 8.987989  | -7.519004  | -3.719340 |
| 1RBP | A | SER | 95  | T | -5.369708  | 8.993982  | -7.526901  | -3.720964 |
| 1RBP | A | PHE | 96  | T | -5.417912  | 8.885983  | -7.443553  | -3.699357 |
| 1RBP | A | LEU | 97  | T | -6.400499  | 10.843537 | -7.143948  | -3.519641 |
| 1RBP | A | GLN | 98  | C | -8.579235  | 11.416677 | -11.861986 | -4.629072 |
| 1RBP | A | LYS | 99  | C | -8.626717  | 11.303504 | -12.060323 | -4.751733 |
| 1RBP | A | GLY | 100 | E | -9.290997  | 10.055139 | -14.581233 | -5.384196 |
| 1RBP | A | ASN | 101 | E | -9.620469  | 8.640624  | -15.944355 | -5.675963 |
| 1RBP | A | ASP | 102 | E | -10.135260 | 7.326650  | -17.277254 | -5.891154 |
| 1RBP | A | ASP | 103 | E | -10.360954 | 7.483262  | -17.073604 | -5.927505 |
| 1RBP | A | HIS | 104 | E | -12.811356 | 9.911445  | -19.688816 | -6.398147 |
| 1RBP | A | TRP | 105 | E | -13.738177 | 19.533777 | -15.083400 | -5.511981 |
| 1RBP | A | ILE | 106 | E | -12.225949 | 14.246757 | -15.112908 | -5.173926 |
| 1RBP | A | VAL | 107 | E | -12.212448 | 14.257097 | -15.184367 | -5.188690 |
| 1RBP | A | ASP | 108 | E | -12.196872 | 14.136498 | -15.347849 | -5.227582 |
| 1RBP | A | THR | 109 | E | -10.877575 | 12.363997 | -15.308855 | -5.854612 |
| 1RBP | A | ASP | 110 | T | -10.832298 | 12.580516 | -15.317401 | -5.868052 |
| 1RBP | A | TYR | 111 | T | -10.884105 | 12.489146 | -15.337189 | -5.936103 |
| 1RBP | A | ASP | 112 | T | -10.791353 | 13.113375 | -14.961491 | -5.782141 |
| 1RBP | A | THR | 113 | T | -10.792972 | 13.118895 | -14.945938 | -5.779991 |
| 1RBP | A | TYR | 114 | E | -11.673484 | 16.420482 | -13.719542 | -5.265992 |
| 1RBP | A | ALA | 115 | E | -11.908952 | 16.810117 | -12.921993 | -4.911392 |
| 1RBP | A | VAL | 116 | E | -11.924721 | 16.774553 | -12.845713 | -4.890431 |
| 1RBP | A | GLN | 117 | E | -15.152706 | 18.210100 | -17.777559 | -5.570783 |
| 1RBP | A | TYR | 118 | E | -15.110058 | 15.254266 | -19.781014 | -5.976939 |
| 1RBP | A | SER | 119 | E | -11.987082 | 9.964438  | -16.912424 | -5.200221 |
| 1RBP | A | CYS | 120 | E | -11.483831 | 9.745376  | -16.950617 | -5.220874 |
| 1RBP | A | ARG | 121 | E | -10.187429 | 7.972351  | -15.441795 | -4.751636 |
| 1RBP | A | LEU | 122 | E | -6.667965  | 4.911296  | -11.370394 | -4.138294 |
| 1RBP | A | LEU | 123 | E | -5.291750  | 4.414182  | -10.454996 | -4.459484 |
| 1RBP | A | ASN | 124 | T | -4.502236  | 4.546618  | -9.876970  | -4.656484 |
| 1RBP | A | LEU | 125 | T | -4.442009  | 4.617210  | -9.998981  | -4.688434 |
| 1RBP | A | ASP | 126 | T | -4.440848  | 4.622362  | -10.005436 | -4.689517 |
| 1RBP | A | GLY | 127 | T | -4.454627  | 4.616676  | -9.974994  | -4.703260 |
| 1RBP | A | THR | 128 | C | -4.601627  | 4.688027  | -9.865845  | -4.761039 |
| 1RBP | A | CYS | 129 | E | -5.812840  | 5.323542  | -11.193853 | -4.993637 |
| 1RBP | A | ALA | 130 | E | -8.033021  | 7.432563  | -13.850329 | -5.458893 |
| 1RBP | A | ASP | 131 | E | -9.212928  | 8.538727  | -17.091912 | -6.959499 |
| 1RBP | A | SER | 132 | E | -10.536987 | 9.023813  | -16.795236 | -5.965500 |
| 1RBP | A | TYR | 133 | E | -12.944074 | 12.856266 | -17.894555 | -5.939375 |
| 1RBP | A | SER | 134 | E | -13.876941 | 16.041443 | -17.389016 | -5.717728 |
| 1RBP | A | PHE | 135 | E | -14.483576 | 19.993832 | -15.182977 | -5.229829 |
| 1RBP | A | VAL | 136 | E | -14.466228 | 19.865049 | -15.266835 | -5.205422 |

|      |   |     |     |   |            |           |            |           |
|------|---|-----|-----|---|------------|-----------|------------|-----------|
| 1RBP | A | PHE | 137 | E | -14.378355 | 18.996023 | -15.785175 | -5.193033 |
| 1RBP | A | SER | 138 | E | -10.895041 | 7.721747  | -16.178977 | -4.823012 |
| 1RBP | A | ARG | 139 | T | -7.548303  | 6.572603  | -12.507356 | -4.859878 |
| 1RBP | A | ASP | 140 | T | -5.192524  | 8.558905  | -8.356253  | -4.754659 |
| 1RBP | A | PRO | 141 | T | -5.007850  | 9.063788  | -8.157310  | -4.663280 |
| 1RBP | A | ASN | 142 | T | -4.980723  | 9.064760  | -8.233338  | -4.657751 |
| 1RBP | A | GLY | 143 | T | -4.952859  | 9.054441  | -8.299230  | -4.644419 |
| 1RBP | A | LEU | 144 | C | -4.945815  | 9.113962  | -8.259819  | -4.623842 |
| 1RBP | A | PRO | 145 | C | -5.550821  | 10.018402 | -8.285283  | -4.379373 |
| 1RBP | A | PRO | 146 | H | -6.159127  | 8.987123  | -9.800903  | -4.298303 |
| 1RBP | A | GLU | 147 | H | -6.389585  | 8.939502  | -9.802367  | -4.185231 |
| 1RBP | A | ALA | 148 | H | -6.822375  | 9.057925  | -9.953801  | -3.991416 |
| 1RBP | A | GLN | 149 | H | -7.326652  | 7.460849  | -11.493335 | -4.112300 |
| 1RBP | A | LYS | 150 | H | -7.636932  | 7.056680  | -11.747406 | -4.158739 |
| 1RBP | A | ILE | 151 | H | -9.240323  | 9.108935  | -13.704794 | -4.659206 |
| 1RBP | A | VAL | 152 | H | -10.346690 | 11.257866 | -13.879886 | -4.642094 |
| 1RBP | A | ARG | 153 | H | -11.804121 | 9.471209  | -16.680660 | -4.587609 |
| 1RBP | A | GLN | 154 | H | -11.993317 | 9.318945  | -16.489182 | -4.538731 |
| 1RBP | A | ARG | 155 | H | -14.425194 | 12.266862 | -20.182369 | -5.489321 |
| 1RBP | A | GLN | 156 | H | -14.628678 | 12.301443 | -21.325023 | -6.101091 |
| 1RBP | A | GLU | 157 | H | -13.077033 | 11.574142 | -18.318770 | -5.691485 |
| 1RBP | A | GLU | 158 | H | -12.592906 | 12.260112 | -17.365543 | -5.433742 |
| 1RBP | A | LEU | 159 | H | -12.102157 | 12.475142 | -16.409018 | -5.156998 |
| 1RBP | A | CYS | 160 | C | -10.562107 | 9.109358  | -15.791010 | -5.188640 |
| 1RBP | A | LEU | 161 | T | -10.484979 | 9.771100  | -15.641732 | -5.233224 |
| 1RBP | A | ALA | 162 | T | -10.299345 | 9.942096  | -15.365641 | -5.065728 |
| 1RBP | A | ARG | 163 | T | -9.850968  | 9.841055  | -14.502146 | -4.757710 |
| 1RBP | A | GLN | 164 | T | -9.477557  | 11.226989 | -13.168110 | -4.600529 |
| 1RBP | A | TYR | 165 | C | -7.463563  | 12.083140 | -8.254408  | -3.808214 |
| 1RBP | A | ARG | 166 | E | -6.597730  | 10.034190 | -8.118846  | -3.486728 |
| 1RBP | A | LEU | 167 | E | -6.596068  | 10.046360 | -8.141976  | -3.501680 |
| 1RBP | A | ILE | 168 | C | -6.594116  | 10.060017 | -8.169542  | -3.520885 |
| 1RBP | A | VAL | 169 | C | -6.569281  | 9.991184  | -8.448978  | -3.655274 |
| 1RBP | A | HIS | 170 | C | -6.533413  | 9.222773  | -9.592776  | -4.240049 |
| 1RBP | A | ASN | 171 | C | -5.712102  | 6.642314  | -10.517545 | -5.007181 |
| 1RBP | A | GLY | 172 | C | -5.712102  | 6.642314  | -10.517545 | -5.007181 |
| 1RBP | A | TYR | 173 | C | -5.712102  | 6.642314  | -10.517545 | -5.007181 |
| 1RBP | A | CYS | 174 | C | -5.712102  | 6.642314  | -10.517545 | -5.007181 |
| 1RLW | A | SER | 16  | C | -11.820510 | 10.489817 | -15.267158 | -4.328905 |
| 1RLW | A | SER | 17  | C | -11.820510 | 10.489817 | -15.267158 | -4.328905 |
| 1RLW | A | HIS | 18  | E | -11.820510 | 10.489817 | -15.267158 | -4.328905 |
| 1RLW | A | LYS | 19  | E | -11.820510 | 10.489817 | -15.267158 | -4.328905 |
| 1RLW | A | PHE | 20  | E | -11.104378 | 16.546145 | -10.928907 | -4.164686 |
| 1RLW | A | THR | 21  | E | -10.256642 | 14.482203 | -11.258984 | -4.106365 |
| 1RLW | A | VAL | 22  | E | -10.228868 | 14.513944 | -11.315823 | -4.096041 |
| 1RLW | A | VAL | 23  | E | -10.175636 | 14.490237 | -11.419816 | -4.081338 |
| 1RLW | A | VAL | 24  | E | -10.117894 | 14.435453 | -11.552838 | -4.088804 |
| 1RLW | A | LEU | 25  | E | -10.174186 | 13.739213 | -11.984815 | -4.127123 |
| 1RLW | A | ARG | 26  | E | -10.484859 | 13.073944 | -13.202993 | -4.277145 |
| 1RLW | A | ALA | 27  | E | -9.846762  | 12.934547 | -12.449150 | -4.521706 |
| 1RLW | A | THR | 28  | E | -9.783897  | 13.054113 | -12.637835 | -4.697321 |
| 1RLW | A | LYS | 29  | T | -8.899225  | 12.191666 | -12.324448 | -5.238719 |
| 1RLW | A | VAL | 30  | T | -8.187217  | 10.478474 | -12.173763 | -5.047697 |
| 1RLW | A | THR | 31  | C | -7.487354  | 9.036952  | -12.172232 | -5.154298 |
| 1RLW | A | LYS | 32  | C | -6.382164  | 6.478936  | -11.886930 | -5.183728 |
| 1RLW | A | GLY | 33  | C | -6.278653  | 6.254549  | -12.063213 | -5.120173 |
| 1RLW | A | ALA | 34  | H | -6.234061  | 6.166623  | -12.100142 | -5.059665 |
| 1RLW | A | PHE | 35  | H | -6.196202  | 6.015746  | -12.146195 | -5.003975 |
| 1RLW | A | GLY | 36  | H | -6.241914  | 5.811321  | -12.161920 | -4.988580 |
| 1RLW | A | ASP | 37  | H | -6.852500  | 5.506440  | -12.878247 | -4.615071 |
| 1RLW | A | MET | 38  | H | -7.084038  | 6.379575  | -12.573130 | -4.478937 |
| 1RLW | A | LEU | 39  | H | -7.326651  | 6.713313  | -12.601099 | -4.519577 |
| 1RLW | A | ASP | 40  | C | -7.842807  | 8.494381  | -12.549281 | -4.703724 |
| 1RLW | A | THR | 41  | C | -7.887051  | 8.693805  | -12.287081 | -4.662003 |
| 1RLW | A | PRO | 42  | C | -8.197458  | 9.728189  | -11.362537 | -4.438448 |
| 1RLW | A | ASP | 43  | C | -10.197480 | 10.341673 | -13.814728 | -4.690934 |
| 1RLW | A | PRO | 44  | E | -12.319018 | 13.830650 | -15.346982 | -4.660051 |
| 1RLW | A | TYR | 45  | E | -12.895742 | 17.910195 | -14.385549 | -4.968806 |
| 1RLW | A | VAL | 46  | E | -12.475226 | 18.229428 | -13.710389 | -5.091084 |
| 1RLW | A | GLU | 47  | E | -12.413929 | 17.987221 | -13.987771 | -5.179963 |
| 1RLW | A | LEU | 48  | E | -11.263734 | 15.429351 | -13.340836 | -5.051705 |
| 1RLW | A | PHE | 49  | E | -9.900872  | 13.647767 | -12.624279 | -5.282590 |
| 1RLW | A | ILE | 50  | E | -6.723314  | 9.421679  | -9.463933  | -4.481750 |
| 1RLW | A | SER | 51  | T | -4.976789  | 5.637257  | -9.196009  | -4.371866 |
| 1RLW | A | THR | 52  | T | -4.903856  | 5.623127  | -9.412406  | -4.408502 |
| 1RLW | A | THR | 53  | T | -4.884563  | 5.656860  | -9.467202  | -4.409835 |
| 1RLW | A | PRO | 54  | T | -4.873690  | 5.688755  | -9.499731  | -4.412902 |
| 1RLW | A | ASP | 55  | T | -4.900255  | 5.518440  | -9.502090  | -4.409846 |
| 1RLW | A | SER | 56  | T | -5.959859  | 5.968504  | -11.096585 | -4.627830 |
| 1RLW | A | ARG | 57  | C | -6.650181  | 6.973661  | -11.176125 | -4.498738 |
| 1RLW | A | LYS | 58  | E | -7.240412  | 7.481072  | -11.274827 | -4.585284 |



|      |   |     |     |   |            |           |            |           |
|------|---|-----|-----|---|------------|-----------|------------|-----------|
| 1RLW | A | ARG | 59  | E | -10.655952 | 11.380344 | -14.797330 | -5.119523 |
| 1RLW | A | THR | 60  | C | -10.145596 | 10.679237 | -14.101780 | -4.986348 |
| 1RLW | A | ARG | 61  | C | -9.064876  | 9.686483  | -13.203203 | -4.880605 |
| 1RLW | A | HIS | 62  | C | -8.980053  | 9.723567  | -13.408937 | -4.948063 |
| 1RLW | A | PHE | 63  | T | -8.919187  | 9.742797  | -13.514429 | -4.968336 |
| 1RLW | A | ASN | 64  | T | -8.275353  | 8.305972  | -13.624744 | -5.141892 |
| 1RLW | A | ASN | 65  | T | -8.127504  | 8.549791  | -13.309570 | -5.015273 |
| 1RLW | A | ASP | 66  | T | -7.875465  | 8.688978  | -12.375155 | -4.615263 |
| 1RLW | A | ILE | 67  | T | -7.877094  | 8.766738  | -12.305770 | -4.596094 |
| 1RLW | A | ASN | 68  | T | -7.825643  | 9.193896  | -12.139532 | -4.605853 |
| 1RLW | A | PRO | 69  | T | -8.023834  | 10.043513 | -11.459165 | -4.337695 |
| 1RLW | A | VAL | 70  | E | -7.711733  | 11.336650 | -10.726319 | -4.653172 |
| 1RLW | A | TRP | 71  | E | -7.951438  | 12.636611 | -10.489096 | -4.957466 |
| 1RLW | A | ASN | 72  | E | -7.895060  | 12.613349 | -10.685464 | -5.044861 |
| 1RLW | A | GLU | 73  | E | -7.960237  | 12.572793 | -10.659177 | -5.084361 |
| 1RLW | A | THR | 74  | E | -7.866581  | 13.325422 | -10.392396 | -5.136150 |
| 1RLW | A | PHE | 75  | E | -8.566325  | 15.548574 | -10.582604 | -5.458747 |
| 1RLW | A | GLU | 76  | E | -8.599603  | 15.461263 | -10.569644 | -5.460074 |
| 1RLW | A | PHE | 77  | E | -8.860632  | 16.976965 | -9.553808  | -5.340475 |
| 1RLW | A | ILE | 78  | E | -8.499732  | 13.055027 | -10.964276 | -4.911156 |
| 1RLW | A | LEU | 79  | E | -8.309444  | 8.996026  | -12.514864 | -4.684830 |
| 1RLW | A | ASP | 80  | T | -7.062603  | 6.140375  | -12.334220 | -4.776681 |
| 1RLW | A | PRO | 81  | T | -7.032095  | 6.206332  | -12.424441 | -4.802228 |
| 1RLW | A | ASN | 82  | T | -7.018816  | 6.232592  | -12.480620 | -4.815787 |
| 1RLW | A | GLN | 83  | T | -7.041924  | 6.133564  | -12.477391 | -4.830580 |
| 1RLW | A | GLU | 84  | C | -7.087855  | 5.905763  | -12.483421 | -4.834294 |
| 1RLW | A | ASN | 85  | C | -8.557936  | 7.665599  | -14.395723 | -5.324572 |
| 1RLW | A | VAL | 86  | E | -9.133332  | 8.758892  | -14.488300 | -5.297205 |
| 1RLW | A | LEU | 87  | E | -10.005904 | 14.134278 | -12.616992 | -4.874945 |
| 1RLW | A | GLU | 88  | E | -10.061836 | 14.763828 | -12.225403 | -4.834369 |
| 1RLW | A | ILE | 89  | E | -10.166705 | 15.414766 | -11.739536 | -4.762512 |
| 1RLW | A | THR | 90  | E | -10.171028 | 15.424030 | -11.729063 | -4.766931 |
| 1RLW | A | LEU | 91  | E | -10.987750 | 16.977893 | -12.647513 | -5.131143 |
| 1RLW | A | MET | 92  | E | -11.209839 | 14.491851 | -15.492233 | -5.912569 |
| 1RLW | A | ASP | 93  | E | -8.244083  | 4.794744  | -14.009363 | -4.581552 |
| 1RLW | A | ALA | 94  | C | -4.760718  | 2.839004  | -9.728367  | -3.968131 |
| 1RLW | A | ASN | 95  | T | -3.905569  | 2.452607  | -9.585335  | -4.234261 |
| 1RLW | A | TYR | 96  | T | -3.870842  | 2.539749  | -9.657324  | -4.249204 |
| 1RLW | A | VAL | 97  | T | -3.857040  | 2.590216  | -9.695339  | -4.258083 |
| 1RLW | A | MET | 98  | T | -3.857375  | 2.589155  | -9.692917  | -4.257920 |
| 1RLW | A | ASP | 99  | C | -4.002745  | 2.519691  | -9.680268  | -4.336214 |
| 1RLW | A | GLU | 100 | E | -5.355479  | 4.281917  | -10.972320 | -4.535714 |
| 1RLW | A | THR | 101 | E | -5.934582  | 5.956950  | -10.941003 | -4.625271 |
| 1RLW | A | LEU | 102 | E | -6.524397  | 10.291387 | -9.576071  | -4.557546 |
| 1RLW | A | GLY | 103 | E | -6.341597  | 10.763142 | -9.318344  | -4.550972 |
| 1RLW | A | THR | 104 | E | -6.066302  | 11.702329 | -8.570085  | -4.527441 |
| 1RLW | A | ALA | 105 | E | -6.087283  | 11.883752 | -8.400742  | -4.491341 |
| 1RLW | A | THR | 106 | E | -6.246265  | 12.490975 | -8.103022  | -4.480086 |
| 1RLW | A | PHE | 107 | E | -6.398455  | 12.974177 | -7.809698  | -4.495684 |
| 1RLW | A | THR | 108 | E | -6.589945  | 13.286266 | -7.567090  | -4.482644 |
| 1RLW | A | VAL | 109 | G | -7.913378  | 13.004834 | -10.088012 | -4.442328 |
| 1RLW | A | SER | 110 | G | -8.034893  | 10.921897 | -11.545365 | -4.563386 |
| 1RLW | A | SER | 111 | G | -7.562742  | 8.640558  | -12.069827 | -4.782131 |
| 1RLW | A | MET | 112 | C | -6.422012  | 7.851410  | -10.672521 | -4.776886 |
| 1RLW | A | LYS | 113 | T | -4.361096  | 6.783792  | -8.187761  | -4.686189 |
| 1RLW | A | VAL | 114 | T | -4.335692  | 6.858566  | -8.271575  | -4.709071 |
| 1RLW | A | GLY | 115 | T | -4.311009  | 6.920202  | -8.382883  | -4.753927 |
| 1RLW | A | GLU | 116 | E | -4.310138  | 6.934760  | -8.383235  | -4.756561 |
| 1RLW | A | LYS | 117 | E | -4.303154  | 7.042575  | -8.343826  | -4.756171 |
| 1RLW | A | LYS | 118 | E | -5.555852  | 9.163187  | -10.035118 | -5.281506 |
| 1RLW | A | GLU | 119 | E | -5.722928  | 9.974268  | -9.587947  | -5.152966 |
| 1RLW | A | VAL | 120 | E | -6.072562  | 11.282476 | -8.440541  | -4.637136 |
| 1RLW | A | PRO | 121 | E | -6.124552  | 11.301837 | -8.225520  | -4.565279 |
| 1RLW | A | PHE | 122 | E | -6.965025  | 14.062089 | -6.915179  | -3.947082 |
| 1RLW | A | ILE | 123 | E | -4.746148  | 9.602866  | -6.339596  | -4.043108 |
| 1RLW | A | PHE | 124 | E | -4.736383  | 9.564899  | -6.421625  | -4.068174 |
| 1RLW | A | ASN | 125 | T | -4.732264  | 9.555063  | -6.459684  | -4.074572 |
| 1RLW | A | GLN | 126 | T | -4.732220  | 9.554877  | -6.460450  | -4.074754 |
| 1RLW | A | VAL | 127 | T | -4.732986  | 9.549238  | -6.456641  | -4.074388 |
| 1RLW | A | THR | 128 | E | -6.576011  | 10.667167 | -9.212170  | -4.688117 |
| 1RLW | A | GLU | 129 | E | -7.649167  | 8.451501  | -11.865155 | -4.969320 |
| 1RLW | A | MET | 130 | E | -9.838122  | 12.198968 | -13.227059 | -5.289467 |
| 1RLW | A | VAL | 131 | E | -11.556363 | 15.478481 | -14.642418 | -5.375146 |
| 1RLW | A | LEU | 132 | E | -12.010267 | 16.992754 | -14.676454 | -5.497231 |
| 1RLW | A | GLU | 133 | E | -12.145265 | 16.889064 | -14.970366 | -5.589094 |
| 1RLW | A | MET | 134 | E | -12.193929 | 16.619590 | -15.308961 | -5.730612 |
| 1RLW | A | SER | 135 | E | -10.791627 | 11.293533 | -15.777511 | -5.936885 |
| 1RLW | A | LEU | 136 | E | -7.996550  | 9.796975  | -11.385038 | -4.844956 |
| 1RLW | A | GLU | 137 | E | -5.037520  | 5.473424  | -8.686064  | -3.947028 |
| 1RLW | A | VAL | 138 | C | -3.247664  | 3.462827  | -6.135006  | -2.822289 |
| 1RLW | A | ALA | 139 | C | -3.247664  | 3.462827  | -6.135006  | -2.822289 |

|      |   |     |     |   |            |           |            |           |
|------|---|-----|-----|---|------------|-----------|------------|-----------|
| 1RLW | A | SER | 140 | C | -3.247664  | 3.462827  | -6.135006  | -2.822289 |
| 1RLW | A | SER | 141 | C | -3.247664  | 3.462827  | -6.135006  | -2.822289 |
| 1SRA | A | PRO | 136 | C | -5.048911  | 2.699035  | -9.675283  | -3.480006 |
| 1SRA | A | PRO | 137 | C | -5.048911  | 2.699035  | -9.675283  | -3.480006 |
| 1SRA | A | CYS | 138 | C | -5.048911  | 2.699035  | -9.675283  | -3.480006 |
| 1SRA | A | LEU | 139 | C | -5.048911  | 2.699035  | -9.675283  | -3.480006 |
| 1SRA | A | ASP | 140 | H | -7.072139  | 2.803491  | -13.970520 | -4.642403 |
| 1SRA | A | SER | 141 | H | -8.276452  | 3.937671  | -15.976595 | -5.313512 |
| 1SRA | A | GLU | 142 | H | -9.159542  | 6.482107  | -16.262735 | -5.610929 |
| 1SRA | A | LEU | 143 | H | -9.508699  | 8.005239  | -14.678689 | -4.952209 |
| 1SRA | A | THR | 144 | H | -9.504717  | 8.084307  | -14.639062 | -4.939555 |
| 1SRA | A | GLU | 145 | H | -10.989014 | 11.608064 | -15.264073 | -5.137051 |
| 1SRA | A | PHE | 146 | H | -11.833906 | 15.750451 | -13.900116 | -4.876995 |
| 1SRA | A | PRO | 147 | H | -11.874184 | 15.733746 | -13.731148 | -4.815419 |
| 1SRA | A | LEU | 148 | H | -12.192481 | 15.526673 | -13.667678 | -4.758804 |
| 1SRA | A | ARG | 149 | H | -15.571860 | 18.972578 | -17.360893 | -5.226845 |
| 1SRA | A | MET | 150 | H | -16.285563 | 20.172305 | -17.725346 | -5.365879 |
| 1SRA | A | ARG | 151 | H | -17.294061 | 19.689721 | -19.728895 | -5.631384 |
| 1SRA | A | ASP | 152 | H | -17.185170 | 18.700193 | -20.771883 | -6.196382 |
| 1SRA | A | TRP | 153 | H | -15.801724 | 16.962943 | -19.126273 | -5.778458 |
| 1SRA | A | LEU | 154 | H | -15.145478 | 17.028646 | -18.284566 | -5.573723 |
| 1SRA | A | LYS | 155 | H | -14.354185 | 15.471688 | -17.829861 | -5.364715 |
| 1SRA | A | ASN | 156 | H | -11.490354 | 12.408329 | -13.968787 | -4.399807 |
| 1SRA | A | VAL | 157 | H | -10.736820 | 13.753386 | -12.324311 | -4.101519 |
| 1SRA | A | LEU | 158 | H | -10.732829 | 13.794252 | -12.331843 | -4.107010 |
| 1SRA | A | VAL | 159 | H | -10.635650 | 14.107871 | -12.489855 | -4.262096 |
| 1SRA | A | THR | 160 | H | -9.820523  | 14.223966 | -11.756949 | -4.650060 |
| 1SRA | A | LEU | 161 | H | -9.808132  | 14.421455 | -11.765752 | -4.724008 |
| 1SRA | A | TYR | 162 | H | -9.734197  | 13.817139 | -12.454992 | -5.028972 |
| 1SRA | A | GLU | 163 | H | -6.951377  | 6.058422  | -12.051533 | -4.852843 |
| 1SRA | A | ARG | 164 | H | -6.864900  | 6.083241  | -12.268509 | -4.883785 |
| 1SRA | A | ASP | 165 | T | -6.448275  | 4.792303  | -12.983991 | -5.059642 |
| 1SRA | A | GLU | 166 | T | -4.818798  | 5.182834  | -9.955188  | -4.858523 |
| 1SRA | A | ASP | 167 | T | -4.813610  | 5.219821  | -9.967581  | -4.860565 |
| 1SRA | A | ASN | 168 | T | -4.829417  | 5.201164  | -9.911989  | -4.860951 |
| 1SRA | A | ASN | 169 | T | -4.829888  | 5.210979  | -9.903061  | -4.860064 |
| 1SRA | A | LEU | 170 | T | -4.847613  | 5.284782  | -9.780227  | -4.847420 |
| 1SRA | A | LEU | 171 | T | -7.247474  | 9.559238  | -11.636907 | -5.006352 |
| 1SRA | A | THR | 172 | C | -7.695518  | 9.686759  | -11.947651 | -4.911810 |
| 1SRA | A | GLU | 173 | H | -7.737696  | 9.671220  | -11.839926 | -4.889564 |
| 1SRA | A | LYS | 174 | H | -8.132157  | 10.093172 | -11.696427 | -4.895712 |
| 1SRA | A | GLN | 175 | H | -9.859240  | 8.896120  | -15.550115 | -5.368199 |
| 1SRA | A | LYS | 176 | H | -10.533166 | 8.484766  | -16.775320 | -5.664046 |
| 1SRA | A | LEU | 177 | H | -11.175357 | 10.067151 | -16.598586 | -5.410830 |
| 1SRA | A | ARG | 178 | H | -11.497279 | 12.303515 | -15.148712 | -4.918386 |
| 1SRA | A | VAL | 179 | H | -11.214768 | 12.911290 | -14.865971 | -4.984972 |
| 1SRA | A | LYS | 180 | H | -10.834724 | 12.030778 | -15.235718 | -5.178738 |
| 1SRA | A | LYS | 181 | H | -10.526272 | 11.502640 | -15.523816 | -5.398484 |
| 1SRA | A | ILE | 182 | H | -9.571769  | 10.016520 | -14.662920 | -5.523488 |
| 1SRA | A | HIS | 183 | H | -7.729778  | 5.505302  | -14.193791 | -5.424594 |
| 1SRA | A | GLU | 184 | H | -7.694814  | 5.562839  | -14.292638 | -5.439649 |
| 1SRA | A | ASN | 185 | T | -7.691246  | 5.579900  | -14.303390 | -5.440843 |
| 1SRA | A | GLU | 186 | T | -7.691974  | 5.567384  | -14.304593 | -5.439732 |
| 1SRA | A | LYS | 187 | T | -7.712633  | 5.420295  | -14.299938 | -5.436364 |
| 1SRA | A | ARG | 188 | T | -9.235457  | 7.091380  | -15.983291 | -5.625302 |
| 1SRA | A | LEU | 189 | C | -7.253227  | 5.157164  | -12.962026 | -4.891300 |
| 1SRA | A | GLU | 190 | C | -5.289249  | 4.834593  | -10.625606 | -4.849999 |
| 1SRA | A | ALA | 191 | C | -4.631218  | 5.104833  | -9.680079  | -4.569331 |
| 1SRA | A | GLY | 192 | C | -4.596896  | 5.216503  | -9.712890  | -4.569309 |
| 1SRA | A | ASP | 193 | C | -4.594057  | 5.230878  | -9.720219  | -4.568296 |
| 1SRA | A | HIS | 194 | C | -4.600122  | 5.236338  | -9.685735  | -4.564343 |
| 1SRA | A | PRO | 195 | C | -4.809964  | 5.440915  | -9.316646  | -4.439300 |
| 1SRA | A | VAL | 196 | H | -6.212705  | 7.444146  | -10.320370 | -4.524489 |
| 1SRA | A | GLU | 197 | H | -7.376196  | 9.653651  | -10.723311 | -4.274306 |
| 1SRA | A | LEU | 198 | H | -7.818074  | 11.241744 | -10.122890 | -4.181288 |
| 1SRA | A | LEU | 199 | H | -7.970052  | 11.711932 | -9.685403  | -4.161197 |
| 1SRA | A | ALA | 200 | H | -9.487796  | 12.848589 | -11.431604 | -4.408291 |
| 1SRA | A | ARG | 201 | H | -10.970281 | 11.788926 | -14.514816 | -4.641689 |
| 1SRA | A | ASP | 202 | H | -11.749326 | 10.804812 | -16.792754 | -5.160514 |
| 1SRA | A | PHE | 203 | H | -11.782038 | 10.724859 | -16.835348 | -5.207661 |
| 1SRA | A | GLU | 204 | H | -11.240304 | 10.527341 | -17.096490 | -5.757287 |
| 1SRA | A | LYS | 205 | H | -11.225394 | 10.677027 | -17.160031 | -5.857211 |
| 1SRA | A | ASN | 206 | H | -11.429682 | 10.776853 | -17.454545 | -6.172606 |
| 1SRA | A | TYR | 207 | G | -11.457241 | 10.820520 | -17.360146 | -6.171530 |
| 1SRA | A | ASN | 208 | G | -11.410030 | 11.566688 | -17.020381 | -6.136575 |
| 1SRA | A | MET | 209 | G | -12.357043 | 16.240141 | -16.009819 | -6.183916 |
| 1SRA | A | TYR | 210 | H | -12.687822 | 20.331906 | -13.483180 | -5.611338 |
| 1SRA | A | ILE | 211 | H | -12.364107 | 20.289791 | -12.649489 | -5.089082 |
| 1SRA | A | PHE | 212 | H | -12.391349 | 20.388430 | -12.478884 | -5.048593 |
| 1SRA | A | PRO | 213 | H | -12.733356 | 20.732201 | -11.695327 | -4.481861 |
| 1SRA | A | VAL | 214 | H | -12.739745 | 20.706740 | -11.661898 | -4.470253 |

|      |   |     |     |   |            |           |            |           |
|------|---|-----|-----|---|------------|-----------|------------|-----------|
| 1SRA | A | HIS | 215 | H | -12.862857 | 20.209783 | -11.658308 | -4.413815 |
| 1SRA | A | TRP | 216 | H | -14.799216 | 19.544086 | -17.280158 | -6.078897 |
| 1SRA | A | GLN | 217 | H | -13.691650 | 16.664873 | -16.838527 | -5.892878 |
| 1SRA | A | PHE | 218 | H | -13.262267 | 15.895832 | -16.814191 | -5.751951 |
| 1SRA | A | GLY | 219 | H | -11.251111 | 10.300603 | -16.703127 | -5.714110 |
| 1SRA | A | GLN | 220 | H | -10.798544 | 10.422091 | -16.190121 | -5.516655 |
| 1SRA | A | LEU | 221 | H | -10.195959 | 9.509304  | -15.275938 | -4.979905 |
| 1SRA | A | ASP | 222 | T | -6.591724  | 4.004550  | -11.634303 | -4.075367 |
| 1SRA | A | GLN | 223 | T | -5.233649  | 3.436443  | -10.290198 | -3.973295 |
| 1SRA | A | HIS | 224 | T | -4.565463  | 3.516485  | -9.773702  | -4.030393 |
| 1SRA | A | PRO | 225 | T | -4.548112  | 3.605792  | -9.790634  | -4.032449 |
| 1SRA | A | ILE | 226 | T | -4.547214  | 3.616809  | -9.792184  | -4.033206 |
| 1SRA | A | ASP | 227 | C | -4.566276  | 3.604583  | -9.731989  | -4.031796 |
| 1SRA | A | GLY | 228 | C | -4.770545  | 3.699197  | -9.562041  | -4.059590 |
| 1SRA | A | TYR | 229 | E | -6.616957  | 6.833151  | -10.387899 | -4.122005 |
| 1SRA | A | LEU | 230 | E | -8.359340  | 10.863024 | -11.026922 | -4.547362 |
| 1SRA | A | SER | 231 | C | -10.218928 | 11.504119 | -14.703777 | -5.037711 |
| 1SRA | A | HIS | 232 | G | -10.278643 | 11.095334 | -14.965247 | -5.022185 |
| 1SRA | A | THR | 233 | G | -9.562865  | 10.090221 | -13.724315 | -4.639736 |
| 1SRA | A | GLU | 234 | G | -9.600588  | 9.922507  | -13.736979 | -4.624279 |
| 1SRA | A | LEU | 235 | G | -9.597738  | 10.169673 | -13.580399 | -4.598792 |
| 1SRA | A | ALA | 236 | G | -9.348360  | 10.774466 | -12.839107 | -4.427903 |
| 1SRA | A | PRO | 237 | G | -9.196966  | 11.120073 | -12.552620 | -4.369438 |
| 1SRA | A | LEU | 238 | G | -8.756348  | 10.159043 | -12.042424 | -4.235420 |
| 1SRA | A | ARG | 239 | C | -7.683483  | 8.596411  | -10.943094 | -3.989166 |
| 1SRA | A | ALA | 240 | T | -5.313095  | 7.827247  | -6.961402  | -3.238961 |
| 1SRA | A | PRO | 241 | T | -5.252693  | 8.120679  | -7.061839  | -3.315819 |
| 1SRA | A | LEU | 242 | T | -5.252521  | 8.122386  | -7.062962  | -3.316309 |
| 1SRA | A | ILE | 243 | T | -5.253638  | 8.120120  | -7.053682  | -3.314648 |
| 1SRA | A | PRO | 244 | T | -5.261885  | 8.117801  | -7.002284  | -3.305916 |
| 1SRA | A | MET | 245 | T | -6.628804  | 10.871870 | -8.041504  | -4.037324 |
| 1SRA | A | GLU | 246 | G | -9.528120  | 13.015785 | -12.093766 | -4.795695 |
| 1SRA | A | HIS | 247 | G | -10.598094 | 13.119553 | -15.166104 | -5.706436 |
| 1SRA | A | CYS | 248 | G | -10.744717 | 12.688315 | -15.620965 | -5.857123 |
| 1SRA | A | THR | 249 | H | -11.074353 | 12.646210 | -16.029185 | -5.982815 |
| 1SRA | A | THR | 250 | H | -11.338329 | 12.251533 | -16.025421 | -5.814296 |
| 1SRA | A | ARG | 251 | H | -12.546188 | 14.664527 | -16.800533 | -5.689873 |
| 1SRA | A | PHE | 252 | H | -12.330729 | 16.335776 | -15.425546 | -5.619127 |
| 1SRA | A | PHE | 253 | H | -11.641581 | 14.017938 | -15.463451 | -5.658843 |
| 1SRA | A | GLU | 254 | H | -9.023887  | 6.879246  | -14.710440 | -5.164934 |
| 1SRA | A | THR | 255 | H | -8.891438  | 6.729177  | -14.994753 | -5.170652 |
| 1SRA | A | CYS | 256 | H | -8.600153  | 5.762684  | -15.429291 | -5.138391 |
| 1SRA | A | ASP | 257 | T | -7.991947  | 4.392167  | -15.145314 | -4.968354 |
| 1SRA | A | LEU | 258 | T | -6.255796  | 2.365981  | -12.704565 | -4.427406 |
| 1SRA | A | ASP | 259 | T | -6.148616  | 2.852206  | -12.708681 | -4.514722 |
| 1SRA | A | ASN | 260 | T | -6.140743  | 2.942405  | -12.697693 | -4.517703 |
| 1SRA | A | ASP | 261 | C | -6.143973  | 2.940219  | -12.677246 | -4.514335 |
| 1SRA | A | LYS | 262 | C | -6.160998  | 2.920689  | -12.609784 | -4.503832 |
| 1SRA | A | TYR | 263 | C | -7.134478  | 5.716185  | -12.786544 | -4.949467 |
| 1SRA | A | ILE | 264 | E | -8.587280  | 9.444337  | -12.470805 | -4.794868 |
| 1SRA | A | ALA | 265 | E | -10.252081 | 12.788883 | -13.299208 | -4.746739 |
| 1SRA | A | LEU | 266 | H | -10.969896 | 16.020830 | -12.765046 | -4.809159 |
| 1SRA | A | ASP | 267 | H | -11.045441 | 15.924856 | -12.936529 | -4.894029 |
| 1SRA | A | GLU | 268 | H | -11.404550 | 14.707692 | -13.924159 | -4.933576 |
| 1SRA | A | TRP | 269 | H | -11.768374 | 16.253988 | -14.241649 | -5.237131 |
| 1SRA | A | ALA | 270 | H | -9.300972  | 11.315437 | -12.511002 | -4.989696 |
| 1SRA | A | GLY | 271 | H | -8.934147  | 12.369087 | -12.055254 | -5.046150 |
| 1SRA | A | CYS | 272 | H | -8.926712  | 12.415968 | -12.066590 | -5.051028 |
| 1SRA | A | PHE | 273 | H | -8.682326  | 13.257444 | -11.544231 | -5.017051 |
| 1SRA | A | GLY | 274 | C | -5.580243  | 7.955599  | -8.792185  | -4.482814 |
| 1SRA | A | ILE | 275 | C | -5.411062  | 8.189543  | -8.882199  | -4.495812 |
| 1SRA | A | LYS | 276 | C | -4.588878  | 7.806834  | -8.061968  | -4.449354 |
| 1SRA | A | GLN | 277 | G | -4.505993  | 7.828108  | -8.195821  | -4.469708 |
| 1SRA | A | LYS | 278 | G | -4.504681  | 7.830427  | -8.203702  | -4.470579 |
| 1SRA | A | ASP | 279 | G | -4.609429  | 7.810467  | -8.091466  | -4.468058 |
| 1SRA | A | ILE | 280 | C | -4.648848  | 7.735709  | -8.017540  | -4.463393 |
| 1SRA | A | ASP | 281 | C | -5.692307  | 8.033720  | -9.169463  | -4.614578 |
| 1SRA | A | LYS | 282 | G | -7.439667  | 9.922426  | -11.326157 | -4.698038 |
| 1SRA | A | ASP | 283 | G | -7.214542  | 9.369025  | -10.127873 | -3.851319 |
| 1SRA | A | LEU | 284 | G | -7.214542  | 9.369025  | -10.127873 | -3.851319 |
| 1SRA | A | VAL | 285 | C | -7.214542  | 9.369025  | -10.127873 | -3.851319 |
| 1SRA | A | ILE | 286 | C | -7.214542  | 9.369025  | -10.127873 | -3.851319 |
| 1TEN | A | ARG | 802 | C | -10.347944 | 10.461446 | -13.665665 | -4.388944 |
| 1TEN | A | LEU | 803 | C | -10.347944 | 10.461446 | -13.665665 | -4.388944 |
| 1TEN | A | ASP | 804 | C | -10.347944 | 10.461446 | -13.665665 | -4.388944 |
| 1TEN | A | ALA | 805 | C | -10.347944 | 10.461446 | -13.665665 | -4.388944 |
| 1TEN | A | PRO | 806 | E | -10.251182 | 13.551052 | -12.143132 | -4.584399 |
| 1TEN | A | SER | 807 | E | -10.282103 | 13.534061 | -12.015130 | -4.564699 |
| 1TEN | A | GLN | 808 | E | -9.957455  | 13.536422 | -12.365557 | -4.767898 |
| 1TEN | A | ILE | 809 | E | -9.574343  | 13.393534 | -12.385199 | -4.887913 |
| 1TEN | A | GLU | 810 | E | -8.384136  | 11.281674 | -11.271521 | -4.658072 |

|      |   |     |     |   |            |           |            |           |
|------|---|-----|-----|---|------------|-----------|------------|-----------|
| 1TEN | A | VAL | 811 | E | -8.160376  | 10.916483 | -11.294634 | -4.536260 |
| 1TEN | A | LYS | 812 | E | -7.901494  | 9.852034  | -11.779488 | -4.539902 |
| 1TEN | A | ASP | 813 | E | -7.475658  | 8.939201  | -11.488535 | -4.347449 |
| 1TEN | A | VAL | 814 | E | -6.965010  | 8.671589  | -10.552272 | -4.060487 |
| 1TEN | A | THR | 815 | T | -6.961117  | 8.498310  | -10.582439 | -4.009995 |
| 1TEN | A | ASP | 816 | T | -6.988359  | 8.409810  | -10.545176 | -3.996860 |
| 1TEN | A | THR | 817 | E | -7.034929  | 8.452169  | -10.372107 | -3.951876 |
| 1TEN | A | THR | 818 | E | -7.202708  | 8.555305  | -10.090855 | -3.878748 |
| 1TEN | A | ALA | 819 | E | -8.418116  | 8.771891  | -11.432405 | -3.990213 |
| 1TEN | A | LEU | 820 | E | -11.406977 | 13.854210 | -14.594523 | -4.819961 |
| 1TEN | A | ILE | 821 | E | -11.841110 | 14.479595 | -13.941242 | -4.486487 |
| 1TEN | A | THR | 822 | E | -12.664104 | 14.836062 | -14.732249 | -4.681933 |
| 1TEN | A | TRP | 823 | E | -12.947986 | 15.513865 | -15.145446 | -4.956885 |
| 1TEN | A | PHE | 824 | C | -9.955149  | 10.520177 | -13.056476 | -4.455440 |
| 1TEN | A | LYS | 825 | C | -9.124370  | 9.310780  | -12.982227 | -4.421382 |
| 1TEN | A | PRO | 826 | C | -8.432601  | 10.348542 | -11.598259 | -4.325982 |
| 1TEN | A | LEU | 827 | C | -8.294265  | 10.054631 | -11.903824 | -4.377149 |
| 1TEN | A | ALA | 828 | C | -8.258700  | 10.012866 | -12.040182 | -4.410639 |
| 1TEN | A | GLU | 829 | C | -8.274734  | 10.035165 | -12.026132 | -4.422787 |
| 1TEN | A | ILE | 830 | C | -8.390671  | 10.290330 | -11.829023 | -4.427851 |
| 1TEN | A | ASP | 831 | E | -8.997169  | 9.363508  | -13.367688 | -4.689809 |
| 1TEN | A | GLY | 832 | E | -9.667475  | 10.363118 | -14.019057 | -4.951943 |
| 1TEN | A | ILE | 833 | E | -10.259071 | 12.067423 | -13.625388 | -4.952510 |
| 1TEN | A | GLU | 834 | E | -11.493053 | 15.286447 | -14.700936 | -5.474490 |
| 1TEN | A | LEU | 835 | E | -11.730446 | 16.578203 | -14.409835 | -5.525854 |
| 1TEN | A | THR | 836 | E | -11.914954 | 17.257459 | -14.251430 | -5.609543 |
| 1TEN | A | TYR | 837 | E | -12.298251 | 17.758025 | -15.014262 | -5.823820 |
| 1TEN | A | GLY | 838 | E | -8.796190  | 8.481879  | -13.348974 | -4.999895 |
| 1TEN | A | ILE | 839 | T | -7.967138  | 7.513155  | -12.783051 | -4.672220 |
| 1TEN | A | LYS | 840 | T | -6.145957  | 5.151105  | -11.466347 | -4.732731 |
| 1TEN | A | ASP | 841 | T | -5.462452  | 4.596312  | -10.952773 | -4.507213 |
| 1TEN | A | VAL | 842 | T | -5.456571  | 4.608577  | -10.974314 | -4.506035 |
| 1TEN | A | PRO | 843 | T | -5.456830  | 4.603559  | -10.974261 | -4.504970 |
| 1TEN | A | GLY | 844 | T | -5.462975  | 4.577833  | -10.958695 | -4.504875 |
| 1TEN | A | ASP | 845 | C | -5.675320  | 4.379830  | -10.766824 | -4.405144 |
| 1TEN | A | ARG | 846 | E | -7.990681  | 6.463098  | -13.353523 | -4.528792 |
| 1TEN | A | THR | 847 | E | -8.004714  | 11.253924 | -11.030925 | -4.664482 |
| 1TEN | A | THR | 848 | E | -7.931482  | 12.294733 | -10.397746 | -4.644932 |
| 1TEN | A | ILE | 849 | E | -7.953687  | 12.402729 | -10.222361 | -4.612022 |
| 1TEN | A | ASP | 850 | E | -7.952582  | 12.397340 | -10.233598 | -4.613270 |
| 1TEN | A | LEU | 851 | E | -7.962880  | 12.409034 | -10.171820 | -4.601934 |
| 1TEN | A | THR | 852 | T | -8.586977  | 11.927811 | -10.933771 | -4.664766 |
| 1TEN | A | GLU | 853 | T | -10.559121 | 8.381753  | -17.061117 | -5.341485 |
| 1TEN | A | ASP | 854 | T | -10.559878 | 8.374495  | -17.092227 | -5.363460 |
| 1TEN | A | GLU | 855 | C | -10.646514 | 8.354449  | -17.140605 | -5.376442 |
| 1TEN | A | ASN | 856 | E | -10.589529 | 10.763088 | -15.665209 | -5.282568 |
| 1TEN | A | GLN | 857 | E | -9.574013  | 14.763514 | -11.337266 | -5.019597 |
| 1TEN | A | TYR | 858 | E | -7.253503  | 12.891463 | -8.495746  | -4.549996 |
| 1TEN | A | SER | 859 | E | -6.390592  | 12.182101 | -7.812379  | -4.315377 |
| 1TEN | A | ILE | 860 | C | -6.250485  | 12.334827 | -7.941481  | -4.383705 |
| 1TEN | A | GLY | 861 | C | -5.804124  | 11.325068 | -8.153947  | -4.475049 |
| 1TEN | A | ASN | 862 | C | -5.805044  | 11.319625 | -8.149464  | -4.474235 |
| 1TEN | A | LEU | 863 | T | -5.814044  | 11.215358 | -8.192016  | -4.468213 |
| 1TEN | A | LYS | 864 | T | -5.752483  | 10.478674 | -8.784194  | -4.687442 |
| 1TEN | A | PRO | 865 | T | -5.808545  | 10.239286 | -8.822026  | -4.692696 |
| 1TEN | A | ASP | 866 | T | -6.260073  | 10.023871 | -9.368248  | -4.848431 |
| 1TEN | A | THR | 867 | E | -6.260076  | 10.023828 | -9.368195  | -4.848411 |
| 1TEN | A | GLU | 868 | E | -6.356936  | 9.723315  | -9.415435  | -4.915508 |
| 1TEN | A | TYR | 869 | E | -10.137898 | 15.466531 | -12.070724 | -5.506289 |
| 1TEN | A | GLU | 870 | E | -13.409062 | 16.826119 | -16.995635 | -6.111032 |
| 1TEN | A | VAL | 871 | E | -12.775438 | 15.544542 | -14.712524 | -4.736666 |
| 1TEN | A | SER | 872 | E | -12.771997 | 15.528562 | -14.733419 | -4.735249 |
| 1TEN | A | LEU | 873 | E | -12.772363 | 15.526697 | -14.730253 | -4.734214 |
| 1TEN | A | ILE | 874 | E | -12.770475 | 15.512165 | -14.755501 | -4.738609 |
| 1TEN | A | SER | 875 | E | -12.781219 | 14.760950 | -15.260322 | -4.826360 |
| 1TEN | A | ARG | 876 | E | -10.997566 | 8.018313  | -16.873334 | -5.347870 |
| 1TEN | A | ARG | 877 | T | -8.930872  | 6.885980  | -14.575544 | -5.114925 |
| 1TEN | A | GLY | 878 | T | -8.207458  | 6.631607  | -14.236616 | -5.170181 |
| 1TEN | A | ASP | 879 | E | -7.470236  | 7.765802  | -12.500846 | -4.940303 |
| 1TEN | A | MET | 880 | E | -7.277284  | 8.413152  | -12.119670 | -4.881637 |
| 1TEN | A | SER | 881 | C | -7.067062  | 8.745134  | -11.619017 | -4.687096 |
| 1TEN | A | SER | 882 | C | -6.576030  | 9.405491  | -10.409739 | -4.625169 |
| 1TEN | A | ASN | 883 | C | -6.603253  | 9.541026  | -10.236473 | -4.598469 |
| 1TEN | A | PRO | 884 | E | -6.709929  | 9.800722  | -9.928358  | -4.549386 |
| 1TEN | A | ALA | 885 | E | -6.776763  | 9.765750  | -9.784934  | -4.527920 |
| 1TEN | A | LYS | 886 | E | -6.896848  | 9.824747  | -9.631549  | -4.594193 |
| 1TEN | A | GLU | 887 | E | -6.896848  | 9.824747  | -9.631549  | -4.594193 |
| 1TEN | A | THR | 888 | E | -6.896848  | 9.824747  | -9.631549  | -4.594193 |
| 1TEN | A | PHE | 889 | E | -6.896848  | 9.824747  | -9.631549  | -4.594193 |
| 1TN3 | A | ALA | 45  | C | -4.051094  | 5.978783  | -7.022049  | -3.628983 |
| 1TN3 | A | LEU | 46  | C | -4.051094  | 5.978783  | -7.022049  | -3.628983 |

|      |   |     |     |   |            |           |            |           |
|------|---|-----|-----|---|------------|-----------|------------|-----------|
| 1TN3 | A | GLN | 47  | C | -4.051094  | 5.978783  | -7.022049  | -3.628983 |
| 1TN3 | A | THR | 48  | C | -4.051094  | 5.978783  | -7.022049  | -3.628983 |
| 1TN3 | A | VAL | 49  | E | -5.381667  | 8.013508  | -8.967842  | -4.479934 |
| 1TN3 | A | CYS | 50  | E | -6.062141  | 8.681018  | -10.435278 | -5.222791 |
| 1TN3 | A | LEU | 51  | E | -6.933055  | 8.143299  | -11.934237 | -4.987628 |
| 1TN3 | A | LYS | 52  | E | -5.929999  | 6.180918  | -11.027965 | -4.814748 |
| 1TN3 | A | GLY | 53  | T | -5.827822  | 6.195595  | -11.184350 | -4.842093 |
| 1TN3 | A | THR | 54  | T | -5.829236  | 6.207985  | -11.188065 | -4.852996 |
| 1TN3 | A | LYS | 55  | T | -5.882924  | 6.071830  | -11.145952 | -4.847993 |
| 1TN3 | A | VAL | 56  | T | -5.899720  | 6.034159  | -11.095861 | -4.842258 |
| 1TN3 | A | HIS | 57  | T | -6.825778  | 6.721597  | -12.002624 | -4.997240 |
| 1TN3 | A | MET | 58  | E | -7.975504  | 9.267307  | -11.861656 | -5.016665 |
| 1TN3 | A | LYS | 59  | E | -10.978393 | 12.255791 | -15.502688 | -5.785852 |
| 1TN3 | A | CYS | 60  | E | -12.122217 | 13.207340 | -16.375617 | -5.759095 |
| 1TN3 | A | PHE | 61  | E | -12.201469 | 19.430113 | -12.115119 | -4.901811 |
| 1TN3 | A | LEU | 62  | E | -11.005230 | 13.828440 | -13.317894 | -4.761818 |
| 1TN3 | A | ALA | 63  | E | -8.629999  | 12.918320 | -10.631811 | -4.858437 |
| 1TN3 | A | PHE | 64  | E | -8.401485  | 13.121812 | -10.943218 | -5.062263 |
| 1TN3 | A | THR | 65  | E | -7.710908  | 11.503409 | -11.411010 | -5.376129 |
| 1TN3 | A | GLN | 66  | E | -7.711011  | 11.500429 | -11.412356 | -5.376581 |
| 1TN3 | A | THR | 67  | E | -7.712625  | 11.497855 | -11.407765 | -5.379187 |
| 1TN3 | A | LYS | 68  | E | -7.851103  | 11.128421 | -11.627696 | -5.516338 |
| 1TN3 | A | THR | 69  | C | -7.924633  | 10.808885 | -11.650613 | -5.518334 |
| 1TN3 | A | PHE | 70  | H | -10.487472 | 13.762480 | -13.866182 | -5.520638 |
| 1TN3 | A | HIS | 71  | H | -9.631913  | 10.061805 | -14.233140 | -5.159018 |
| 1TN3 | A | GLU | 72  | H | -9.614139  | 9.960648  | -14.332266 | -5.162404 |
| 1TN3 | A | ALA | 73  | H | -9.607778  | 9.911861  | -14.382809 | -5.163148 |
| 1TN3 | A | SER | 74  | H | -9.711806  | 8.965182  | -14.737470 | -5.111231 |
| 1TN3 | A | GLU | 75  | H | -9.608870  | 8.251525  | -15.137303 | -5.038370 |
| 1TN3 | A | ASP | 76  | H | -10.258678 | 6.091337  | -17.279602 | -4.865377 |
| 1TN3 | A | CYS | 77  | H | -8.477742  | 4.334465  | -14.277856 | -4.265382 |
| 1TN3 | A | ILE | 78  | H | -5.451815  | 4.426354  | -9.986353  | -4.098261 |
| 1TN3 | A | SER | 79  | H | -5.427197  | 4.465936  | -10.087085 | -4.117826 |
| 1TN3 | A | ARG | 80  | H | -5.420393  | 4.527118  | -10.103265 | -4.127208 |
| 1TN3 | A | GLY | 81  | C | -5.416322  | 4.557817  | -10.120383 | -4.134225 |
| 1TN3 | A | GLY | 82  | C | -5.419459  | 4.560664  | -10.099045 | -4.133857 |
| 1TN3 | A | THR | 83  | E | -7.097517  | 6.701640  | -12.315452 | -4.718372 |
| 1TN3 | A | LEU | 84  | E | -7.777038  | 9.504697  | -11.999529 | -5.018974 |
| 1TN3 | A | SER | 85  | C | -8.340899  | 9.115389  | -12.708127 | -5.157532 |
| 1TN3 | A | THR | 86  | C | -9.194793  | 11.573468 | -13.257218 | -5.500878 |
| 1TN3 | A | PRO | 87  | C | -8.827718  | 10.746577 | -13.024237 | -5.205533 |
| 1TN3 | A | GLN | 88  | C | -8.798467  | 10.557728 | -13.215448 | -5.229620 |
| 1TN3 | A | THR | 89  | C | -8.792081  | 10.510967 | -13.267243 | -5.231515 |
| 1TN3 | A | GLY | 90  | H | -8.796834  | 10.435679 | -13.284952 | -5.225592 |
| 1TN3 | A | SER | 91  | H | -9.127888  | 9.720800  | -13.477430 | -5.016815 |
| 1TN3 | A | GLU | 92  | H | -10.286139 | 7.865116  | -16.927771 | -5.565243 |
| 1TN3 | A | ASN | 93  | H | -11.005430 | 7.192209  | -18.071117 | -5.420350 |
| 1TN3 | A | ASP | 94  | H | -11.231910 | 8.850880  | -17.354123 | -5.278392 |
| 1TN3 | A | ALA | 95  | H | -11.731244 | 12.603255 | -15.554947 | -5.053908 |
| 1TN3 | A | LEU | 96  | H | -11.821882 | 13.417196 | -14.969191 | -5.045255 |
| 1TN3 | A | TYR | 97  | H | -11.871984 | 13.514823 | -14.739243 | -5.015154 |
| 1TN3 | A | GLU | 98  | H | -11.893232 | 13.495342 | -14.652170 | -5.006719 |
| 1TN3 | A | TYR | 99  | H | -15.280470 | 17.752205 | -18.641082 | -5.712410 |
| 1TN3 | A | LEU | 100 | H | -13.424495 | 13.868034 | -16.710756 | -5.156940 |
| 1TN3 | A | ARG | 101 | H | -11.163673 | 9.972951  | -15.975114 | -5.273481 |
| 1TN3 | A | GLN | 102 | H | -9.343817  | 8.543397  | -14.457292 | -5.278856 |
| 1TN3 | A | SER | 103 | H | -8.110567  | 8.381988  | -12.758605 | -4.995831 |
| 1TN3 | A | VAL | 104 | H | -6.717199  | 7.371119  | -10.711033 | -4.422647 |
| 1TN3 | A | GLY | 105 | T | -6.699371  | 7.366486  | -10.813023 | -4.445008 |
| 1TN3 | A | ASN | 106 | T | -6.697918  | 7.376373  | -10.818461 | -4.446062 |
| 1TN3 | A | GLU | 107 | T | -6.704408  | 7.364865  | -10.779127 | -4.436861 |
| 1TN3 | A | ALA | 108 | T | -6.754804  | 7.276698  | -10.624868 | -4.390808 |
| 1TN3 | A | GLU | 109 | E | -8.725293  | 7.606410  | -14.095283 | -5.155378 |
| 1TN3 | A | ILE | 110 | E | -10.097040 | 11.767693 | -13.415674 | -4.940058 |
| 1TN3 | A | TRP | 111 | E | -11.574060 | 19.091498 | -12.008215 | -4.895850 |
| 1TN3 | A | LEU | 112 | E | -11.581159 | 18.359441 | -12.524181 | -4.991725 |
| 1TN3 | A | GLY | 113 | E | -11.479182 | 17.215477 | -13.413744 | -5.182510 |
| 1TN3 | A | LEU | 114 | E | -10.863809 | 13.442096 | -14.451815 | -5.268640 |
| 1TN3 | A | ASN | 115 | E | -9.165728  | 7.665691  | -14.498398 | -5.112167 |
| 1TN3 | A | ASP | 116 | E | -8.437688  | 7.746383  | -14.009059 | -5.230141 |
| 1TN3 | A | MET | 117 | E | -5.985458  | 6.415878  | -10.891700 | -5.058831 |
| 1TN3 | A | ALA | 118 | E | -4.752075  | 5.329329  | -9.519636  | -4.599361 |
| 1TN3 | A | ALA | 119 | E | -4.749458  | 5.357418  | -9.525359  | -4.602257 |
| 1TN3 | A | GLU | 120 | T | -4.749586  | 5.359039  | -9.523404  | -4.602206 |
| 1TN3 | A | GLY | 121 | T | -4.750408  | 5.355751  | -9.517455  | -4.601259 |
| 1TN3 | A | THR | 122 | E | -4.827804  | 5.210386  | -9.331971  | -4.537430 |
| 1TN3 | A | TRP | 123 | E | -7.915401  | 11.841112 | -10.916560 | -5.255179 |
| 1TN3 | A | VAL | 124 | E | -8.232841  | 7.027752  | -13.587236 | -4.966115 |
| 1TN3 | A | ASP | 125 | T | -6.723299  | 5.056173  | -12.522095 | -4.937596 |
| 1TN3 | A | MET | 126 | T | -5.924239  | 5.402968  | -11.048845 | -4.507858 |
| 1TN3 | A | THR | 127 | T | -5.569394  | 6.072287  | -10.067692 | -4.135698 |

|      |   |     |     |   |            |           |            |           |
|------|---|-----|-----|---|------------|-----------|------------|-----------|
| 1TN3 | A | GLY | 128 | T | -5.091503  | 6.350985  | -8.993478  | -3.820651 |
| 1TN3 | A | ALA | 129 | C | -5.092885  | 6.362014  | -8.975040  | -3.815856 |
| 1TN3 | A | ARG | 130 | B | -5.124778  | 6.496422  | -8.759330  | -3.748803 |
| 1TN3 | A | ILE | 131 | C | -5.249738  | 6.739826  | -8.344867  | -3.607443 |
| 1TN3 | A | ALA | 132 | C | -5.430299  | 6.687117  | -8.157307  | -3.580906 |
| 1TN3 | A | TYR | 133 | C | -7.765665  | 12.360139 | -9.749670  | -4.334436 |
| 1TN3 | A | LYS | 134 | C | -7.886335  | 12.621931 | -9.627530  | -4.449594 |
| 1TN3 | A | ASN | 135 | C | -8.791959  | 12.045923 | -11.598280 | -5.075589 |
| 1TN3 | A | TRP | 136 | B | -7.127079  | 11.036161 | -9.572335  | -4.831824 |
| 1TN3 | A | GLU | 137 | T | -4.636258  | 4.988316  | -8.983358  | -4.351271 |
| 1TN3 | A | THR | 138 | T | -3.487627  | 3.372063  | -8.078049  | -3.920630 |
| 1TN3 | A | GLU | 139 | T | -3.487145  | 3.373548  | -8.082335  | -3.921325 |
| 1TN3 | A | ILE | 140 | T | -3.487088  | 3.373986  | -8.082835  | -3.921386 |
| 1TN3 | A | THR | 141 | T | -3.488333  | 3.357635  | -8.079884  | -3.919429 |
| 1TN3 | A | ALA | 142 | T | -3.579447  | 3.099501  | -7.925350  | -3.845919 |
| 1TN3 | A | GLN | 143 | T | -7.556896  | 5.697026  | -13.598806 | -4.832290 |
| 1TN3 | A | PRO | 144 | T | -6.481468  | 4.428595  | -12.220149 | -4.710567 |
| 1TN3 | A | ASP | 145 | T | -5.109471  | 2.476679  | -11.715119 | -4.823836 |
| 1TN3 | A | GLY | 146 | C | -4.655524  | 3.241684  | -11.190547 | -4.880610 |
| 1TN3 | A | GLY | 147 | G | -4.649426  | 3.264215  | -11.210233 | -4.883434 |
| 1TN3 | A | LYS | 148 | G | -4.648687  | 3.268404  | -11.213521 | -4.883796 |
| 1TN3 | A | THR | 149 | G | -4.675184  | 3.220542  | -11.171265 | -4.892232 |
| 1TN3 | A | GLU | 150 | C | -5.012330  | 3.946266  | -10.791589 | -4.934048 |
| 1TN3 | A | ASN | 151 | C | -7.267050  | 5.642095  | -13.344288 | -5.191699 |
| 1TN3 | A | CYS | 152 | E | -8.510592  | 6.609848  | -14.332036 | -5.270526 |
| 1TN3 | A | ALA | 153 | E | -10.172792 | 13.079838 | -12.594013 | -4.450118 |
| 1TN3 | A | VAL | 154 | E | -9.995101  | 13.036042 | -12.461707 | -4.388401 |
| 1TN3 | A | LEU | 155 | E | -9.402392  | 11.439663 | -12.496831 | -4.394091 |
| 1TN3 | A | SER | 156 | E | -6.574352  | 6.563695  | -10.735575 | -4.434304 |
| 1TN3 | A | GLY | 157 | T | -4.617201  | 5.539519  | -8.880224  | -4.467633 |
| 1TN3 | A | ALA | 158 | T | -4.594793  | 5.583317  | -8.957103  | -4.476856 |
| 1TN3 | A | ALA | 159 | T | -4.594768  | 5.583588  | -8.957314  | -4.476913 |
| 1TN3 | A | ASN | 160 | T | -4.594880  | 5.582655  | -8.956631  | -4.476928 |
| 1TN3 | A | GLY | 161 | T | -4.616075  | 5.548224  | -8.892096  | -4.478331 |
| 1TN3 | A | LYS | 162 | E | -6.544567  | 6.737688  | -10.951121 | -4.712813 |
| 1TN3 | A | TRP | 163 | E | -10.194380 | 12.068236 | -13.477410 | -5.177386 |
| 1TN3 | A | PHE | 164 | E | -12.688199 | 16.082462 | -15.463604 | -5.775130 |
| 1TN3 | A | ASP | 165 | E | -11.842921 | 8.712775  | -17.227059 | -5.071037 |
| 1TN3 | A | LYS | 166 | E | -9.196109  | 7.698724  | -13.955447 | -4.770033 |
| 1TN3 | A | ARG | 167 | T | -8.053282  | 7.171275  | -12.936642 | -4.690887 |
| 1TN3 | A | CYS | 168 | T | -7.941697  | 7.608816  | -12.970576 | -4.777494 |
| 1TN3 | A | ARG | 169 | T | -7.896773  | 7.924055  | -12.886687 | -4.766541 |
| 1TN3 | A | ASP | 170 | T | -7.897446  | 7.924216  | -12.881539 | -4.766240 |
| 1TN3 | A | GLN | 171 | C | -7.966453  | 7.959866  | -12.752506 | -4.766249 |
| 1TN3 | A | LEU | 172 | E | -8.760107  | 10.440399 | -12.722165 | -5.016560 |
| 1TN3 | A | PRO | 173 | E | -9.441128  | 11.995020 | -11.834008 | -4.630986 |
| 1TN3 | A | TYR | 174 | E | -12.154550 | 18.641535 | -12.923878 | -4.951686 |
| 1TN3 | A | ILE | 175 | E | -12.129737 | 18.522631 | -13.471912 | -5.336383 |
| 1TN3 | A | CYS | 176 | E | -10.791688 | 12.134416 | -15.598335 | -6.180619 |
| 1TN3 | A | GLN | 177 | E | -8.308447  | 10.826460 | -11.563517 | -5.068649 |
| 1TN3 | A | PHE | 178 | E | -4.856135  | 7.884664  | -6.435610  | -3.362931 |
| 1TN3 | A | GLY | 179 | E | -4.856135  | 7.884664  | -6.435610  | -3.362931 |
| 1TN3 | A | ILE | 180 | C | -4.856135  | 7.884664  | -6.435610  | -3.362931 |
| 1TN3 | A | VAL | 181 | C | -4.856135  | 7.884664  | -6.435610  | -3.362931 |
| 1ZON | A | GLY | 128 | C | -9.078199  | 7.853929  | -13.425768 | -4.524791 |
| 1ZON | A | ASN | 129 | C | -9.078199  | 7.853929  | -13.425768 | -4.524791 |
| 1ZON | A | VAL | 130 | E | -9.078199  | 7.853929  | -13.425768 | -4.524791 |
| 1ZON | A | ASP | 131 | E | -9.078199  | 7.853929  | -13.425768 | -4.524791 |
| 1ZON | A | LEU | 132 | E | -11.873051 | 13.016864 | -15.642655 | -5.397903 |
| 1ZON | A | VAL | 133 | E | -13.301122 | 19.331732 | -14.542312 | -5.311147 |
| 1ZON | A | PHE | 134 | E | -13.210770 | 21.450043 | -12.917098 | -5.039747 |
| 1ZON | A | LEU | 135 | E | -12.480872 | 17.269928 | -14.545195 | -5.355382 |
| 1ZON | A | PHE | 136 | E | -11.988153 | 15.075086 | -15.304216 | -5.425624 |
| 1ZON | A | ASP | 137 | E | -11.131764 | 8.918200  | -16.935248 | -5.217549 |
| 1ZON | A | GLY | 138 | C | -9.830364  | 8.595506  | -14.791078 | -4.912434 |
| 1ZON | A | SER | 139 | B | -9.513741  | 9.008829  | -14.561109 | -4.927643 |
| 1ZON | A | MET | 140 | T | -8.575447  | 8.100708  | -13.134318 | -4.525108 |
| 1ZON | A | SER | 141 | T | -8.196060  | 7.552073  | -13.237227 | -4.547100 |
| 1ZON | A | LEU | 142 | T | -7.710950  | 8.083111  | -12.513915 | -4.637532 |
| 1ZON | A | GLN | 143 | C | -7.681291  | 8.280342  | -12.457692 | -4.648552 |
| 1ZON | A | PRO | 144 | H | -7.691831  | 8.258875  | -12.427555 | -4.643573 |
| 1ZON | A | ASP | 145 | H | -7.808721  | 8.342820  | -12.353392 | -4.691886 |
| 1ZON | A | GLU | 146 | H | -7.976354  | 8.797240  | -12.025213 | -4.730629 |
| 1ZON | A | PHE | 147 | H | -9.226095  | 10.976498 | -12.450805 | -4.874829 |
| 1ZON | A | GLN | 148 | H | -11.554973 | 12.112507 | -15.845302 | -5.361613 |
| 1ZON | A | LYS | 149 | H | -12.596462 | 13.937626 | -16.733656 | -5.637406 |
| 1ZON | A | ILE | 150 | H | -12.539331 | 15.432104 | -15.753447 | -5.505653 |
| 1ZON | A | LEU | 151 | H | -12.535251 | 15.463749 | -15.758304 | -5.509965 |
| 1ZON | A | ASP | 152 | H | -12.499960 | 15.564904 | -15.847519 | -5.589835 |
| 1ZON | A | PHE | 153 | H | -13.013969 | 19.186930 | -14.876552 | -5.700484 |
| 1ZON | A | MET | 154 | H | -12.887104 | 18.783203 | -15.159378 | -5.780371 |

|      |   |     |     |   |            |           |            |           |
|------|---|-----|-----|---|------------|-----------|------------|-----------|
| 1ZON | A | LYS | 155 | H | -12.677744 | 16.071350 | -16.334569 | -5.916254 |
| 1ZON | A | ASP | 156 | H | -10.578584 | 12.353221 | -13.849930 | -5.129070 |
| 1ZON | A | VAL | 157 | H | -10.302390 | 12.892098 | -13.590981 | -5.076817 |
| 1ZON | A | MET | 158 | H | -10.218818 | 12.774304 | -13.800586 | -5.106620 |
| 1ZON | A | LYS | 159 | H | -9.350897  | 9.489693  | -14.054211 | -4.981111 |
| 1ZON | A | LYS | 160 | H | -7.918917  | 7.827684  | -12.340240 | -4.643573 |
| 1ZON | A | LEU | 161 | H | -7.877992  | 7.827459  | -12.443985 | -4.652049 |
| 1ZON | A | SER | 162 | T | -7.870676  | 7.833029  | -12.477864 | -4.659748 |
| 1ZON | A | ASN | 163 | T | -7.871739  | 7.825587  | -12.474397 | -4.659195 |
| 1ZON | A | THR | 164 | T | -7.910532  | 7.779373  | -12.362241 | -4.639912 |
| 1ZON | A | SER | 165 | C | -9.264234  | 8.774896  | -14.029417 | -4.896948 |
| 1ZON | A | TYR | 166 | E | -10.212755 | 10.223746 | -14.624723 | -5.221543 |
| 1ZON | A | GLN | 167 | E | -11.914308 | 14.040450 | -15.738563 | -5.639302 |
| 1ZON | A | PHE | 168 | E | -12.356079 | 17.311271 | -13.266871 | -4.590927 |
| 1ZON | A | ALA | 169 | E | -12.244063 | 17.069842 | -13.445874 | -4.563330 |
| 1ZON | A | ALA | 170 | E | -12.218833 | 16.995041 | -13.572788 | -4.582812 |
| 1ZON | A | VAL | 171 | E | -12.209991 | 16.923896 | -13.649578 | -4.594826 |
| 1ZON | A | GLN | 172 | E | -12.632962 | 16.069611 | -14.691606 | -4.651799 |
| 1ZON | A | PHE | 173 | E | -12.579902 | 15.535643 | -15.323034 | -5.002221 |
| 1ZON | A | SER | 174 | T | -11.264993 | 11.866806 | -15.409147 | -5.360516 |
| 1ZON | A | THR | 175 | T | -10.533680 | 12.350372 | -14.411305 | -5.301615 |
| 1ZON | A | SER | 176 | T | -10.486119 | 12.456136 | -14.488723 | -5.326169 |
| 1ZON | A | TYR | 177 | E | -10.479451 | 12.523389 | -14.489578 | -5.332163 |
| 1ZON | A | LYS | 178 | E | -10.457558 | 12.569330 | -14.535907 | -5.354970 |
| 1ZON | A | THR | 179 | E | -10.617118 | 12.880190 | -14.275089 | -5.350698 |
| 1ZON | A | GLU | 180 | E | -11.629844 | 14.335934 | -15.473313 | -5.685856 |
| 1ZON | A | PHE | 181 | E | -12.076798 | 15.088044 | -15.510322 | -5.754763 |
| 1ZON | A | ASP | 182 | T | -12.190753 | 14.451078 | -15.650269 | -5.734395 |
| 1ZON | A | PHE | 183 | H | -13.908112 | 17.740016 | -16.542762 | -5.456773 |
| 1ZON | A | SER | 184 | H | -12.613789 | 11.465389 | -17.181379 | -5.202018 |
| 1ZON | A | ASP | 185 | H | -11.688134 | 11.427015 | -15.836500 | -4.930533 |
| 1ZON | A | TYR | 186 | H | -9.943525  | 10.081174 | -13.516648 | -4.533910 |
| 1ZON | A | VAL | 187 | H | -7.466089  | 6.842995  | -11.575312 | -4.269034 |
| 1ZON | A | LYS | 188 | H | -7.324590  | 7.268306  | -11.561646 | -4.277919 |
| 1ZON | A | ARG | 189 | T | -7.321479  | 7.283634  | -11.576033 | -4.281186 |
| 1ZON | A | LYS | 190 | T | -7.292521  | 7.378208  | -11.652420 | -4.313084 |
| 1ZON | A | ASP | 191 | T | -7.282132  | 7.458098  | -11.652711 | -4.322205 |
| 1ZON | A | PRO | 192 | H | -8.037716  | 9.215426  | -11.933632 | -4.472490 |
| 1ZON | A | ASP | 193 | H | -8.699908  | 10.361895 | -12.917021 | -4.859624 |
| 1ZON | A | ALA | 194 | H | -7.950391  | 11.397729 | -10.584544 | -4.420508 |
| 1ZON | A | LEU | 195 | H | -7.335887  | 12.934740 | -8.771998  | -4.307881 |
| 1ZON | A | LEU | 196 | H | -5.731321  | 9.323599  | -7.979299  | -4.109364 |
| 1ZON | A | LYS | 197 | T | -5.367730  | 8.813689  | -8.298822  | -4.180235 |
| 1ZON | A | HIS | 198 | T | -5.363502  | 8.828003  | -8.320593  | -4.186616 |
| 1ZON | A | VAL | 199 | T | -5.368698  | 8.801829  | -8.309677  | -4.186314 |
| 1ZON | A | LYS | 200 | C | -5.382972  | 8.682744  | -8.320562  | -4.184738 |
| 1ZON | A | HIS | 201 | C | -5.815967  | 8.271036  | -8.749083  | -4.282162 |
| 1ZON | A | MET | 202 | C | -8.035334  | 10.902619 | -11.981542 | -5.109916 |
| 1ZON | A | LEU | 203 | C | -8.706694  | 10.898302 | -13.200679 | -5.211261 |
| 1ZON | A | LEU | 204 | B | -8.807722  | 10.823146 | -13.281403 | -5.279852 |
| 1ZON | A | LEU | 205 | C | -9.180363  | 12.067449 | -13.038373 | -5.425495 |
| 1ZON | A | THR | 206 | T | -9.879291  | 12.605311 | -13.776998 | -5.661470 |
| 1ZON | A | ASN | 207 | T | -10.938610 | 12.954330 | -15.493804 | -5.620250 |
| 1ZON | A | THR | 208 | H | -10.287766 | 15.956038 | -11.788106 | -4.961704 |
| 1ZON | A | PHE | 209 | H | -10.311986 | 16.169193 | -11.500002 | -4.842338 |
| 1ZON | A | GLY | 210 | H | -10.279531 | 16.013701 | -11.665768 | -4.846389 |
| 1ZON | A | ALA | 211 | H | -10.282811 | 16.027962 | -11.616505 | -4.821554 |
| 1ZON | A | ILE | 212 | H | -10.322878 | 16.146747 | -11.407566 | -4.776987 |
| 1ZON | A | ASN | 213 | H | -11.364914 | 14.127553 | -14.324146 | -4.778197 |
| 1ZON | A | TYR | 214 | H | -10.598169 | 13.074555 | -12.955077 | -4.453596 |
| 1ZON | A | VAL | 215 | H | -9.231854  | 12.050491 | -10.848335 | -3.922430 |
| 1ZON | A | ALA | 216 | H | -9.133638  | 12.596306 | -10.836840 | -4.017510 |
| 1ZON | A | THR | 217 | H | -9.119843  | 12.681430 | -10.868062 | -4.036194 |
| 1ZON | A | GLU | 218 | H | -9.119078  | 12.696543 | -10.866877 | -4.038279 |
| 1ZON | A | VAL | 219 | H | -9.115497  | 12.858674 | -10.809870 | -4.057371 |
| 1ZON | A | PHE | 220 | T | -9.681986  | 14.661311 | -11.718388 | -4.658001 |
| 1ZON | A | ARG | 221 | T | -7.851333  | 7.558227  | -12.395630 | -4.770586 |
| 1ZON | A | GLU | 222 | G | -7.310281  | 8.218728  | -11.860437 | -4.826734 |
| 1ZON | A | GLU | 223 | G | -7.310317  | 8.217416  | -11.860835 | -4.826770 |
| 1ZON | A | LEU | 224 | G | -7.312225  | 8.193441  | -11.863051 | -4.827574 |
| 1ZON | A | GLY | 225 | C | -7.311379  | 8.146229  | -11.892480 | -4.828363 |
| 1ZON | A | ALA | 226 | C | -7.576352  | 8.589552  | -11.682029 | -4.849730 |
| 1ZON | A | ARG | 227 | T | -9.002482  | 7.400323  | -14.513031 | -4.687096 |
| 1ZON | A | PRO | 228 | T | -7.252396  | 8.638803  | -10.843656 | -4.546487 |
| 1ZON | A | ASP | 229 | T | -7.239499  | 8.697236  | -10.871176 | -4.547297 |
| 1ZON | A | ALA | 230 | T | -7.235224  | 8.810792  | -10.823129 | -4.542684 |
| 1ZON | A | THR | 231 | E | -7.249847  | 8.867503  | -10.735515 | -4.542583 |
| 1ZON | A | LYS | 232 | E | -7.259284  | 8.904974  | -10.665918 | -4.537598 |
| 1ZON | A | VAL | 233 | E | -9.120914  | 13.923913 | -11.052301 | -4.481911 |
| 1ZON | A | LEU | 234 | E | -9.527080  | 17.004596 | -9.775216  | -4.374260 |
| 1ZON | A | ILE | 235 | E | -10.162914 | 19.997568 | -9.296294  | -4.373389 |

|      |   |     |     |   |            |           |            |           |
|------|---|-----|-----|---|------------|-----------|------------|-----------|
| 1ZON | A | ILE | 236 | E | -10.168330 | 19.035967 | -10.036420 | -4.547755 |
| 1ZON | A | ILE | 237 | E | -10.204939 | 17.919969 | -10.928225 | -4.756249 |
| 1ZON | A | THR | 238 | E | -9.340320  | 11.794864 | -13.374867 | -5.495507 |
| 1ZON | A | ASP | 239 | C | -8.224985  | 9.321981  | -12.939322 | -5.343725 |
| 1ZON | A | GLY | 240 | C | -7.786308  | 8.953421  | -12.867674 | -5.316510 |
| 1ZON | A | GLU | 241 | C | -7.275357  | 8.611324  | -11.979065 | -4.918665 |
| 1ZON | A | ALA | 242 | C | -5.557969  | 6.930291  | -9.281436  | -4.320757 |
| 1ZON | A | THR | 243 | C | -5.306560  | 6.262643  | -9.891522  | -4.449781 |
| 1ZON | A | ASP | 244 | C | -5.291589  | 6.290272  | -9.918373  | -4.448811 |
| 1ZON | A | SER | 245 | C | -4.941896  | 6.577861  | -9.526274  | -4.455057 |
| 1ZON | A | GLY | 246 | C | -4.847370  | 6.650129  | -9.580221  | -4.495725 |
| 1ZON | A | ASN | 247 | C | -5.033780  | 6.633856  | -9.768866  | -4.574811 |
| 1ZON | A | ILE | 248 | C | -5.174221  | 7.111839  | -9.423953  | -4.540250 |
| 1ZON | A | ASP | 249 | G | -5.187493  | 7.095511  | -9.388463  | -4.539732 |
| 1ZON | A | ALA | 250 | G | -5.858775  | 7.429488  | -10.081752 | -4.688970 |
| 1ZON | A | ALA | 251 | G | -7.031444  | 9.293977  | -10.803688 | -4.479313 |
| 1ZON | A | LYS | 252 | T | -7.569947  | 9.173363  | -11.738260 | -4.607582 |
| 1ZON | A | ASP | 253 | T | -8.059937  | 8.611520  | -12.772685 | -4.740938 |
| 1ZON | A | ILE | 254 | T | -8.389524  | 10.066485 | -12.122891 | -4.736628 |
| 1ZON | A | ILE | 255 | E | -9.148958  | 10.651049 | -12.369298 | -4.762414 |
| 1ZON | A | ARG | 256 | E | -12.053917 | 11.823139 | -16.238522 | -5.337605 |
| 1ZON | A | TYR | 257 | E | -11.385555 | 19.568383 | -10.411568 | -4.682257 |
| 1ZON | A | ILE | 258 | E | -8.860687  | 14.766028 | -9.289270  | -4.345406 |
| 1ZON | A | ILE | 259 | E | -7.794203  | 11.594347 | -9.893320  | -4.355017 |
| 1ZON | A | GLY | 260 | E | -7.552359  | 10.397928 | -10.726160 | -4.467294 |
| 1ZON | A | ILE | 261 | E | -7.525800  | 10.509127 | -10.757680 | -4.481621 |
| 1ZON | A | GLY | 262 | T | -7.359236  | 10.165825 | -11.074336 | -4.584857 |
| 1ZON | A | LYS | 263 | T | -7.363883  | 9.731062  | -11.354253 | -4.625280 |
| 1ZON | A | HIS | 264 | T | -7.668760  | 8.897019  | -12.272033 | -4.808172 |
| 1ZON | A | PHE | 265 | T | -7.693470  | 8.850548  | -12.400509 | -4.858284 |
| 1ZON | A | GLN | 266 | T | -6.566547  | 4.173397  | -12.632208 | -4.621741 |
| 1ZON | A | THR | 267 | C | -6.591697  | 3.871821  | -12.722370 | -4.610038 |
| 1ZON | A | LYS | 268 | H | -6.599950  | 3.787320  | -12.732827 | -4.608673 |
| 1ZON | A | GLU | 269 | H | -6.600122  | 3.785442  | -12.732141 | -4.608557 |
| 1ZON | A | SER | 270 | H | -6.637066  | 3.526777  | -12.732546 | -4.595735 |
| 1ZON | A | GLN | 271 | H | -8.676266  | 5.876708  | -14.920040 | -5.001345 |
| 1ZON | A | GLU | 272 | H | -9.597831  | 7.650547  | -15.583892 | -5.341858 |
| 1ZON | A | THR | 273 | H | -10.750431 | 12.548616 | -14.896796 | -5.409993 |
| 1ZON | A | LEU | 274 | C | -10.814913 | 13.330744 | -14.315491 | -5.322954 |
| 1ZON | A | HIS | 275 | G | -10.815711 | 13.335074 | -14.301908 | -5.318490 |
| 1ZON | A | LYS | 276 | G | -10.846365 | 13.344966 | -14.175991 | -5.291573 |
| 1ZON | A | PHE | 277 | G | -11.422587 | 14.414441 | -14.305004 | -4.989647 |
| 1ZON | A | ALA | 278 | C | -9.099561  | 7.774430  | -13.115780 | -4.211557 |
| 1ZON | A | SER | 279 | T | -8.314521  | 6.512766  | -12.955682 | -4.052756 |
| 1ZON | A | LYS | 280 | T | -7.747937  | 6.598881  | -12.629110 | -4.223798 |
| 1ZON | A | PRO | 281 | T | -7.699212  | 6.931805  | -12.576457 | -4.246196 |
| 1ZON | A | ALA | 282 | H | -7.695393  | 6.978492  | -12.571600 | -4.248401 |
| 1ZON | A | SER | 283 | H | -7.752516  | 6.908086  | -12.519225 | -4.253375 |
| 1ZON | A | GLU | 284 | H | -7.950790  | 7.245651  | -12.368958 | -4.355943 |
| 1ZON | A | PHE | 285 | H | -9.143917  | 11.143678 | -12.004487 | -4.523828 |
| 1ZON | A | VAL | 286 | E | -10.234859 | 14.081532 | -12.715902 | -4.859228 |
| 1ZON | A | LYS | 287 | E | -10.277638 | 13.792060 | -13.579831 | -5.356436 |
| 1ZON | A | ILE | 288 | E | -9.524360  | 16.037660 | -11.179708 | -5.223102 |
| 1ZON | A | LEU | 289 | E | -9.138437  | 15.652835 | -11.259122 | -5.343817 |
| 1ZON | A | ASP | 290 | C | -8.378942  | 13.220812 | -11.397819 | -5.347630 |
| 1ZON | A | THR | 291 | C | -8.376575  | 13.276087 | -11.384913 | -5.355365 |
| 1ZON | A | PHE | 292 | G | -8.388591  | 13.277531 | -11.334953 | -5.351722 |
| 1ZON | A | GLU | 293 | G | -8.406283  | 12.629562 | -11.691319 | -5.373533 |
| 1ZON | A | LYS | 294 | G | -8.486830  | 12.222344 | -11.775619 | -5.354811 |
| 1ZON | A | LEU | 295 | T | -9.662284  | 11.915080 | -13.853299 | -5.377641 |
| 1ZON | A | LYS | 296 | T | -9.274730  | 11.329548 | -13.129254 | -4.989975 |
| 1ZON | A | ASP | 297 | T | -8.253315  | 11.616104 | -11.136525 | -4.767131 |
| 1ZON | A | LEU | 298 | T | -8.242553  | 12.037673 | -10.895396 | -4.741547 |
| 1ZON | A | PHE | 299 | H | -8.240145  | 12.061481 | -10.894814 | -4.743804 |
| 1ZON | A | THR | 300 | H | -8.107971  | 11.622658 | -11.276831 | -4.781210 |
| 1ZON | A | GLU | 301 | H | -8.157275  | 11.626023 | -11.188381 | -4.787694 |
| 1ZON | A | LEU | 302 | H | -8.841098  | 11.744180 | -12.351794 | -5.019616 |
| 1ZON | A | GLN | 303 | H | -8.358346  | 12.139118 | -11.995837 | -5.437055 |
| 1ZON | A | LYS | 304 | H | -6.153406  | 11.006155 | -8.005441  | -4.486019 |
| 1ZON | A | LYS | 305 | H | -5.752857  | 10.959188 | -7.492728  | -4.109366 |
| 1ZON | A | ILE | 306 | H | -5.752857  | 10.959188 | -7.492728  | -4.109366 |
| 1ZON | A | TYR | 307 | C | -5.752857  | 10.959188 | -7.492728  | -4.109366 |
| 1ZON | A | VAL | 308 | C | -5.752857  | 10.959188 | -7.492728  | -4.109366 |
| 1ZXQ | A | LYS | 1   | C | -5.283067  | 6.859254  | -8.587223  | -4.009659 |
| 1ZXQ | A | VAL | 2   | C | -5.283067  | 6.859254  | -8.587223  | -4.009659 |
| 1ZXQ | A | PHE | 3   | C | -5.283067  | 6.859254  | -8.587223  | -4.009659 |
| 1ZXQ | A | GLU | 4   | C | -5.283067  | 6.859254  | -8.587223  | -4.009659 |
| 1ZXQ | A | VAL | 5   | E | -6.687607  | 9.790749  | -9.605922  | -4.722124 |
| 1ZXQ | A | HIS | 6   | E | -8.911439  | 11.280688 | -13.377434 | -5.745577 |
| 1ZXQ | A | VAL | 7   | E | -8.833458  | 11.462581 | -11.508976 | -4.478986 |
| 1ZXQ | A | ARG | 8   | E | -8.820078  | 11.290023 | -11.499489 | -4.381965 |



|      |   |     |    |   |            |           |            |           |
|------|---|-----|----|---|------------|-----------|------------|-----------|
| 1ZXQ | A | PRO | 9  | T | -8.532464  | 11.645482 | -11.210935 | -4.333320 |
| 1ZXQ | A | LYS | 10 | T | -8.474313  | 11.774744 | -11.188049 | -4.313378 |
| 1ZXQ | A | LYS | 11 | E | -8.482739  | 11.898564 | -11.095441 | -4.299647 |
| 1ZXQ | A | LEU | 12 | E | -8.547621  | 12.691365 | -10.411281 | -4.001632 |
| 1ZXQ | A | ALA | 13 | E | -7.069795  | 11.352008 | -8.306971  | -3.809714 |
| 1ZXQ | A | VAL | 14 | E | -6.189257  | 8.818442  | -8.910294  | -4.003520 |
| 1ZXQ | A | GLU | 15 | T | -5.527987  | 8.049684  | -8.982320  | -4.264252 |
| 1ZXQ | A | PRO | 16 | T | -5.425308  | 8.374501  | -8.898304  | -4.252999 |
| 1ZXQ | A | LYS | 17 | T | -5.401044  | 8.441722  | -8.945276  | -4.272985 |
| 1ZXQ | A | GLY | 18 | E | -5.430626  | 8.309545  | -8.997883  | -4.301984 |
| 1ZXQ | A | SER | 19 | E | -5.575398  | 8.365244  | -8.969722  | -4.368540 |
| 1ZXQ | A | LEU | 20 | E | -6.349252  | 10.209741 | -8.837196  | -4.308434 |
| 1ZXQ | A | GLU | 21 | E | -7.188801  | 10.568650 | -10.029709 | -4.670357 |
| 1ZXQ | A | VAL | 22 | E | -8.354898  | 12.862577 | -10.015901 | -4.501446 |
| 1ZXQ | A | ASN | 23 | E | -9.823261  | 12.681453 | -13.401481 | -5.041014 |
| 1ZXQ | A | CYS | 24 | E | -9.996103  | 9.850041  | -15.730915 | -5.410193 |
| 1ZXQ | A | SER | 25 | E | -9.615010  | 8.795781  | -15.834152 | -5.542852 |
| 1ZXQ | A | THR | 26 | E | -8.323718  | 7.496358  | -14.184335 | -5.482330 |
| 1ZXQ | A | THR | 27 | C | -7.979086  | 7.381410  | -13.850146 | -5.252839 |
| 1ZXQ | A | CYS | 28 | T | -7.889855  | 7.272672  | -13.921079 | -5.206209 |
| 1ZXQ | A | ASN | 29 | T | -7.455491  | 6.746448  | -13.106162 | -4.763123 |
| 1ZXQ | A | GLN | 30 | T | -6.038931  | 6.908020  | -9.997314  | -4.312611 |
| 1ZXQ | A | PRO | 31 | T | -5.827171  | 7.003594  | -10.049959 | -4.348699 |
| 1ZXQ | A | GLU | 32 | T | -5.806701  | 7.089504  | -10.073556 | -4.366962 |
| 1ZXQ | A | VAL | 33 | E | -5.808571  | 7.092942  | -10.060012 | -4.365366 |
| 1ZXQ | A | GLY | 34 | E | -5.827766  | 7.122154  | -9.985193  | -4.366311 |
| 1ZXQ | A | GLY | 35 | E | -6.427435  | 7.466821  | -10.504525 | -4.537458 |
| 1ZXQ | A | LEU | 36 | E | -7.591982  | 9.025471  | -11.642850 | -4.928479 |
| 1ZXQ | A | GLU | 37 | E | -8.120355  | 8.165475  | -13.226146 | -5.064786 |
| 1ZXQ | A | THR | 38 | C | -7.265561  | 9.219188  | -11.418839 | -4.988760 |
| 1ZXQ | A | SER | 39 | C | -7.200007  | 9.101249  | -11.507535 | -4.933595 |
| 1ZXQ | A | LEU | 40 | C | -7.097811  | 9.482092  | -11.336335 | -4.894804 |
| 1ZXQ | A | ASN | 41 | E | -6.417716  | 10.199920 | -9.649142  | -4.679587 |
| 1ZXQ | A | LYS | 42 | E | -6.051346  | 10.408295 | -9.030025  | -4.565636 |
| 1ZXQ | A | ILE | 43 | E | -5.238854  | 9.794907  | -7.620144  | -4.251468 |
| 1ZXQ | A | LEU | 44 | E | -5.162793  | 9.847604  | -7.763108  | -4.304927 |
| 1ZXQ | A | LEU | 45 | E | -5.133023  | 9.754478  | -7.886343  | -4.316627 |
| 1ZXQ | A | ASP | 46 | E | -5.180964  | 9.685407  | -7.806747  | -4.294523 |
| 1ZXQ | A | GLU | 47 | E | -5.250655  | 9.581697  | -7.719536  | -4.274087 |
| 1ZXQ | A | GLN | 48 | E | -6.167402  | 9.572272  | -9.398832  | -4.652531 |
| 1ZXQ | A | ALA | 49 | T | -6.835266  | 8.322530  | -10.416991 | -4.574940 |
| 1ZXQ | A | GLN | 50 | T | -8.931022  | 8.445042  | -14.158491 | -5.094612 |
| 1ZXQ | A | TRP | 51 | E | -9.343181  | 9.614592  | -13.706354 | -5.202059 |
| 1ZXQ | A | LYS | 52 | E | -12.072758 | 12.048775 | -16.676242 | -5.677534 |
| 1ZXQ | A | HIS | 53 | E | -14.040712 | 17.645430 | -17.600902 | -6.045435 |
| 1ZXQ | A | TYR | 54 | E | -12.727828 | 16.506035 | -14.677570 | -5.234120 |
| 1ZXQ | A | LEU | 55 | E | -10.492239 | 13.830146 | -12.109559 | -4.493576 |
| 1ZXQ | A | VAL | 56 | E | -9.810057  | 12.710296 | -12.055595 | -4.353184 |
| 1ZXQ | A | SER | 57 | E | -8.502910  | 9.878707  | -11.568133 | -4.278772 |
| 1ZXQ | A | ASN | 58 | E | -7.745939  | 8.832327  | -11.392511 | -4.295989 |
| 1ZXQ | A | ILE | 59 | E | -7.490884  | 8.682880  | -11.399074 | -4.261012 |
| 1ZXQ | A | SER | 60 | C | -7.079152  | 7.409471  | -11.573368 | -4.217575 |
| 1ZXQ | A | HIS | 61 | C | -7.046768  | 7.483693  | -11.614765 | -4.240355 |
| 1ZXQ | A | ASP | 62 | C | -7.093124  | 7.318615  | -11.627600 | -4.239076 |
| 1ZXQ | A | THR | 63 | E | -7.254508  | 6.975998  | -11.728708 | -4.220984 |
| 1ZXQ | A | VAL | 64 | E | -7.413019  | 6.537086  | -11.826337 | -4.228682 |
| 1ZXQ | A | LEU | 65 | E | -8.696337  | 9.240587  | -12.425196 | -4.634763 |
| 1ZXQ | A | GLN | 66 | E | -10.685589 | 11.198627 | -15.453348 | -5.407684 |
| 1ZXQ | A | CYS | 67 | E | -11.002405 | 11.625562 | -15.413344 | -5.470157 |
| 1ZXQ | A | HIS | 68 | E | -12.034750 | 14.032685 | -16.272354 | -5.602445 |
| 1ZXQ | A | PHE | 69 | E | -9.437933  | 11.135896 | -12.960741 | -5.151740 |
| 1ZXQ | A | THR | 70 | E | -7.257688  | 6.618969  | -12.652026 | -5.190019 |
| 1ZXQ | A | CYS | 71 | E | -6.795885  | 6.335165  | -12.899865 | -5.369523 |
| 1ZXQ | A | SER | 72 | T | -6.721799  | 6.357480  | -12.995861 | -5.365983 |
| 1ZXQ | A | GLY | 73 | T | -6.547721  | 6.821069  | -12.833566 | -5.421688 |
| 1ZXQ | A | LYS | 74 | E | -6.550736  | 6.797744  | -12.837828 | -5.424542 |
| 1ZXQ | A | GLN | 75 | E | -6.751649  | 6.963786  | -12.933994 | -5.528074 |
| 1ZXQ | A | GLU | 76 | E | -7.163488  | 7.849905  | -12.764083 | -5.535491 |
| 1ZXQ | A | SER | 77 | E | -7.328107  | 8.297385  | -12.469160 | -5.600332 |
| 1ZXQ | A | MET | 78 | E | -9.085197  | 10.603107 | -14.597767 | -5.876777 |
| 1ZXQ | A | ASN | 79 | E | -9.193611  | 10.629679 | -14.561637 | -5.898177 |
| 1ZXQ | A | SER | 80 | E | -9.889650  | 10.577327 | -15.276432 | -5.619112 |
| 1ZXQ | A | ASN | 81 | E | -10.084583 | 10.457530 | -15.198405 | -5.522685 |
| 1ZXQ | A | VAL | 82 | E | -10.835792 | 11.621305 | -15.140590 | -5.225422 |
| 1ZXQ | A | SER | 83 | E | -11.601031 | 11.457605 | -16.031410 | -5.152618 |
| 1ZXQ | A | VAL | 84 | E | -12.403202 | 14.549451 | -15.416933 | -4.874636 |
| 1ZXQ | A | TYR | 85 | C | -12.724275 | 17.436010 | -14.658241 | -5.046407 |
| 1ZXQ | A | GLN | 86 | B | -11.125429 | 12.432097 | -14.114499 | -4.793869 |
| 1ZXQ | A | PRO | 87 | C | -9.599543  | 13.395955 | -10.852823 | -4.146545 |
| 1ZXQ | A | PRO | 88 | C | -9.558789  | 13.337572 | -11.016056 | -4.156543 |
| 1ZXQ | A | ARG | 89 | C | -9.550966  | 13.319204 | -11.069313 | -4.163927 |

|      |   |     |     |   |            |           |            |           |
|------|---|-----|-----|---|------------|-----------|------------|-----------|
| 1ZXQ | A | GLN | 90  | C | -9.258267  | 13.379507 | -11.305244 | -4.402090 |
| 1ZXQ | A | VAL | 91  | C | -9.063673  | 14.448199 | -10.849997 | -4.554558 |
| 1ZXQ | A | ILE | 92  | E | -9.319275  | 15.014116 | -11.106602 | -4.848965 |
| 1ZXQ | A | LEU | 93  | E | -9.288377  | 14.993864 | -11.187999 | -4.884017 |
| 1ZXQ | A | THR | 94  | E | -8.400973  | 11.102071 | -11.459830 | -4.593858 |
| 1ZXQ | A | LEU | 95  | E | -7.171498  | 10.914652 | -9.432968  | -4.381456 |
| 1ZXQ | A | GLN | 96  | E | -6.788051  | 9.916302  | -9.590176  | -4.206717 |
| 1ZXQ | A | PRO | 97  | T | -6.510781  | 9.839403  | -9.143186  | -3.909061 |
| 1ZXQ | A | THR | 98  | T | -6.466842  | 9.972483  | -9.102507  | -3.876172 |
| 1ZXQ | A | LEU | 99  | E | -6.295521  | 9.998750  | -8.917184  | -3.829063 |
| 1ZXQ | A | VAL | 100 | E | -6.380959  | 9.668114  | -8.997453  | -3.713302 |
| 1ZXQ | A | ALA | 101 | T | -6.315840  | 8.981772  | -9.362011  | -3.792047 |
| 1ZXQ | A | VAL | 102 | T | -6.498539  | 8.728896  | -9.728798  | -3.935704 |
| 1ZXQ | A | GLY | 103 | T | -6.544854  | 8.485709  | -9.824878  | -3.975898 |
| 1ZXQ | A | LYS | 104 | E | -6.863921  | 7.355885  | -10.682135 | -4.133182 |
| 1ZXQ | A | SER | 105 | E | -6.979131  | 7.105048  | -10.675485 | -4.178368 |
| 1ZXQ | A | PHE | 106 | E | -9.500381  | 12.011867 | -12.374558 | -4.734903 |
| 1ZXQ | A | THR | 107 | E | -10.534089 | 12.099111 | -14.095454 | -5.216647 |
| 1ZXQ | A | ILE | 108 | E | -12.114038 | 14.897414 | -15.557578 | -5.237453 |
| 1ZXQ | A | GLU | 109 | E | -12.292686 | 13.792563 | -16.489873 | -5.301965 |
| 1ZXQ | A | CYS | 110 | E | -12.020557 | 11.643953 | -16.799205 | -4.979875 |
| 1ZXQ | A | ARG | 111 | E | -11.689768 | 11.174965 | -16.040648 | -4.545759 |
| 1ZXQ | A | VAL | 112 | E | -10.850980 | 12.266151 | -13.935905 | -4.516384 |
| 1ZXQ | A | PRO | 113 | C | -10.731863 | 12.244634 | -13.988546 | -4.525464 |
| 1ZXQ | A | THR | 114 | C | -10.678062 | 12.440851 | -13.958013 | -4.535681 |
| 1ZXQ | A | VAL | 115 | T | -10.466858 | 13.044092 | -13.512218 | -4.564010 |
| 1ZXQ | A | GLU | 116 | B | -10.478735 | 13.128906 | -13.521816 | -4.614179 |
| 1ZXQ | A | PRO | 117 | T | -10.703769 | 13.540479 | -13.681811 | -4.666075 |
| 1ZXQ | A | LEU | 118 | G | -10.750055 | 13.866429 | -13.594924 | -4.705863 |
| 1ZXQ | A | ASP | 119 | G | -10.770429 | 13.856272 | -13.625457 | -4.726467 |
| 1ZXQ | A | SER | 120 | E | -11.236732 | 13.797531 | -14.501003 | -4.844786 |
| 1ZXQ | A | LEU | 121 | G | -11.287406 | 14.518426 | -14.048404 | -4.784048 |
| 1ZXQ | A | THR | 122 | E | -11.561154 | 14.968593 | -14.119100 | -4.881074 |
| 1ZXQ | A | LEU | 123 | E | -12.031960 | 16.065822 | -13.953194 | -4.855128 |
| 1ZXQ | A | PHE | 124 | E | -12.687757 | 20.052354 | -12.425742 | -4.707284 |
| 1ZXQ | A | LEU | 125 | E | -12.543406 | 18.314820 | -13.799363 | -5.136492 |
| 1ZXQ | A | PHE | 126 | E | -10.242734 | 10.513548 | -15.020066 | -5.694411 |
| 1ZXQ | A | ARG | 127 | E | -6.296718  | 8.116206  | -10.880331 | -5.475303 |
| 1ZXQ | A | GLY | 128 | T | -4.747012  | 8.421264  | -8.344335  | -5.024203 |
| 1ZXQ | A | ASN | 129 | T | -4.739663  | 8.452234  | -8.367401  | -5.024714 |
| 1ZXQ | A | GLU | 130 | E | -4.738264  | 8.466178  | -8.371283  | -5.025441 |
| 1ZXQ | A | THR | 131 | E | -4.736735  | 8.483709  | -8.373024  | -5.025627 |
| 1ZXQ | A | LEU | 132 | E | -4.780493  | 8.516508  | -8.180631  | -4.990840 |
| 1ZXQ | A | HIS | 133 | E | -7.119430  | 12.156262 | -10.055894 | -5.114999 |
| 1ZXQ | A | TYR | 134 | E | -7.774974  | 14.842023 | -9.802852  | -5.242659 |
| 1ZXQ | A | GLU | 135 | E | -7.784071  | 13.663118 | -10.389199 | -5.133882 |
| 1ZXQ | A | THR | 136 | E | -6.414208  | 10.299169 | -8.649031  | -4.357519 |
| 1ZXQ | A | PHE | 137 | C | -5.525041  | 9.678658  | -7.724933  | -4.099821 |
| 1ZXQ | A | GLY | 138 | C | -3.806501  | 4.735507  | -7.217043  | -3.592068 |
| 1ZXQ | A | LYS | 139 | C | -3.727310  | 4.801279  | -7.281236  | -3.542186 |
| 1ZXQ | A | ALA | 140 | T | -3.647494  | 4.842890  | -7.296306  | -3.470573 |
| 1ZXQ | A | ALA | 141 | T | -3.651834  | 4.798851  | -7.290969  | -3.463540 |
| 1ZXQ | A | PRO | 142 | T | -3.671295  | 4.639276  | -7.287434  | -3.444345 |
| 1ZXQ | A | ALA | 143 | T | -4.498317  | 5.217890  | -7.580261  | -3.079628 |
| 1ZXQ | A | PRO | 144 | T | -4.861039  | 5.196150  | -7.474765  | -2.993581 |
| 1ZXQ | A | GLN | 145 | T | -7.081999  | 7.888989  | -11.168598 | -4.102004 |
| 1ZXQ | A | GLU | 146 | T | -7.480806  | 8.850404  | -11.555258 | -4.390390 |
| 1ZXQ | A | ALA | 147 | E | -7.896499  | 10.147590 | -11.656266 | -4.564245 |
| 1ZXQ | A | THR | 148 | E | -7.704415  | 12.469925 | -10.458408 | -4.943478 |
| 1ZXQ | A | ALA | 149 | E | -7.783960  | 12.803495 | -10.289614 | -4.978917 |
| 1ZXQ | A | THR | 150 | E | -7.661633  | 12.381221 | -10.670556 | -5.038135 |
| 1ZXQ | A | PHE | 151 | E | -7.711420  | 12.320438 | -10.710205 | -5.084114 |
| 1ZXQ | A | ASN | 152 | E | -7.725747  | 12.164458 | -10.791157 | -5.107113 |
| 1ZXQ | A | SER | 153 | E | -8.378427  | 10.391590 | -12.754286 | -5.114335 |
| 1ZXQ | A | THR | 154 | E | -7.932336  | 8.886278  | -12.211329 | -4.595372 |
| 1ZXQ | A | ALA | 155 | E | -8.126328  | 8.167321  | -12.221481 | -4.308097 |
| 1ZXQ | A | ASP | 156 | C | -8.077716  | 8.075543  | -12.428252 | -4.394221 |
| 1ZXQ | A | ARG | 157 | G | -6.570890  | 6.979789  | -11.037724 | -4.672294 |
| 1ZXQ | A | GLU | 158 | G | -6.559933  | 6.985475  | -11.102560 | -4.691753 |
| 1ZXQ | A | ASP | 159 | G | -6.595770  | 6.921186  | -11.058725 | -4.720104 |
| 1ZXQ | A | GLY | 160 | G | -6.596806  | 6.920944  | -11.052162 | -4.720627 |
| 1ZXQ | A | HIS | 161 | C | -6.602690  | 6.909373  | -11.018172 | -4.715734 |
| 1ZXQ | A | ARG | 162 | C | -8.779588  | 7.684793  | -14.401800 | -5.441376 |
| 1ZXQ | A | ASN | 163 | E | -10.763433 | 11.642051 | -15.724508 | -5.759332 |
| 1ZXQ | A | PHE | 164 | E | -11.111955 | 13.344036 | -14.710818 | -5.666525 |
| 1ZXQ | A | SER | 165 | E | -11.962723 | 12.856438 | -15.006561 | -4.622312 |
| 1ZXQ | A | CYS | 166 | E | -11.119769 | 13.791390 | -13.026130 | -4.277308 |
| 1ZXQ | A | LEU | 167 | E | -10.538653 | 14.234710 | -12.104723 | -4.161489 |
| 1ZXQ | A | ALA | 168 | E | -10.196091 | 14.491325 | -11.794754 | -4.196503 |
| 1ZXQ | A | VAL | 169 | E | -10.065900 | 14.385272 | -11.961208 | -4.263112 |
| 1ZXQ | A | LEU | 170 | E | -9.720241  | 13.275798 | -12.282631 | -4.415888 |

|      |   |     |     |   |            |           |            |           |
|------|---|-----|-----|---|------------|-----------|------------|-----------|
| 1ZXQ | A | ASP | 171 | E | -9.729686  | 13.065673 | -12.467009 | -4.473773 |
| 1ZXQ | A | LEU | 172 | E | -9.781354  | 12.595128 | -12.885547 | -4.591293 |
| 1ZXQ | A | MET | 173 | T | -9.158146  | 8.369755  | -14.516477 | -5.024628 |
| 1ZXQ | A | SER | 174 | T | -8.911110  | 7.640452  | -14.830130 | -5.073309 |
| 1ZXQ | A | ARG | 175 | T | -8.297352  | 8.636099  | -13.525005 | -5.216449 |
| 1ZXQ | A | GLY | 176 | T | -6.366418  | 9.001627  | -9.572882  | -4.643376 |
| 1ZXQ | A | GLY | 177 | C | -5.768593  | 9.984300  | -8.520964  | -4.511659 |
| 1ZXQ | A | ASN | 178 | E | -5.761545  | 10.016536 | -8.530214  | -4.509775 |
| 1ZXQ | A | ILE | 179 | E | -5.752948  | 10.073605 | -8.530820  | -4.507452 |
| 1ZXQ | A | PHE | 180 | E | -5.758257  | 10.081643 | -8.492400  | -4.500590 |
| 1ZXQ | A | HIS | 181 | E | -6.003068  | 10.626404 | -8.048777  | -4.439773 |
| 1ZXQ | A | LYS | 182 | E | -7.496614  | 10.704401 | -10.876194 | -4.524235 |
| 1ZXQ | A | HIS | 183 | E | -7.379281  | 9.214658  | -11.511811 | -4.553201 |
| 1ZXQ | A | SER | 184 | C | -7.508249  | 7.855048  | -12.359000 | -4.600464 |
| 1ZXQ | A | ALA | 185 | C | -7.513442  | 7.812563  | -12.353910 | -4.597556 |
| 1ZXQ | A | PRO | 186 | C | -7.588297  | 7.647257  | -12.323446 | -4.583656 |
| 1ZXQ | A | LYS | 187 | E | -7.847521  | 7.542651  | -12.331381 | -4.590228 |
| 1ZXQ | A | MET | 188 | E | -8.783690  | 10.729656 | -12.027922 | -4.536383 |
| 1ZXQ | A | LEU | 189 | C | -7.366625  | 13.958004 | -6.608358  | -3.381914 |
| 1ZXQ | A | GLU | 190 | E | -7.366625  | 13.958004 | -6.608358  | -3.381914 |
| 1ZXQ | A | ILE | 191 | E | -7.366625  | 13.958004 | -6.608358  | -3.381914 |
| 1ZXQ | A | TYR | 192 | C | -7.366625  | 13.958004 | -6.608358  | -3.381914 |
| 2ABL | A | MET | 75  | C | -3.133744  | 3.439392  | -7.091312  | -3.396118 |
| 2ABL | A | GLY | 76  | C | -3.133744  | 3.439392  | -7.091312  | -3.396118 |
| 2ABL | A | PRO | 77  | C | -3.133744  | 3.439392  | -7.091312  | -3.396118 |
| 2ABL | A | SER | 78  | C | -3.133744  | 3.439392  | -7.091312  | -3.396118 |
| 2ABL | A | GLU | 79  | T | -3.989330  | 3.860900  | -9.017474  | -4.294586 |
| 2ABL | A | ASN | 80  | T | -4.769551  | 4.172662  | -10.503574 | -5.064620 |
| 2ABL | A | ASP | 81  | T | -6.681123  | 5.763495  | -13.851309 | -6.286677 |
| 2ABL | A | PRO | 82  | T | -8.109667  | 7.496125  | -15.620769 | -6.722860 |
| 2ABL | A | ASN | 83  | T | -9.014842  | 7.463580  | -16.003943 | -5.991317 |
| 2ABL | A | LEU | 84  | T | -10.579830 | 10.992999 | -16.588732 | -6.264505 |
| 2ABL | A | PHE | 85  | E | -11.415359 | 16.004306 | -12.617006 | -4.290335 |
| 2ABL | A | VAL | 86  | E | -9.305502  | 12.450103 | -10.941960 | -4.280644 |
| 2ABL | A | ALA | 87  | E | -9.297037  | 12.487241 | -10.970752 | -4.287797 |
| 2ABL | A | LEU | 88  | E | -8.760407  | 12.772515 | -10.800444 | -4.468860 |
| 2ABL | A | TYR | 89  | T | -8.320433  | 12.693620 | -10.667064 | -4.542333 |
| 2ABL | A | ASP | 90  | T | -7.353923  | 10.019814 | -10.149242 | -4.271127 |
| 2ABL | A | PHE | 91  | T | -6.183991  | 7.636428  | -9.582548  | -4.176631 |
| 2ABL | A | VAL | 92  | B | -4.506900  | 2.593039  | -9.754224  | -4.052749 |
| 2ABL | A | ALA | 93  | C | -4.367294  | 2.493444  | -10.029646 | -4.090973 |
| 2ABL | A | SER | 94  | C | -3.688783  | 3.263774  | -9.153106  | -4.284648 |
| 2ABL | A | GLY | 95  | C | -3.685754  | 3.277273  | -9.163502  | -4.287219 |
| 2ABL | A | ASP | 96  | T | -3.693305  | 3.226119  | -9.159223  | -4.288697 |
| 2ABL | A | ASN | 97  | T | -3.855154  | 3.521403  | -8.960870  | -4.361329 |
| 2ABL | A | THR | 98  | T | -3.910207  | 3.655677  | -8.754581  | -4.372831 |
| 2ABL | A | LEU | 99  | B | -6.631291  | 6.854824  | -10.934726 | -4.642034 |
| 2ABL | A | SER | 100 | T | -8.488259  | 9.666098  | -12.866492 | -4.774914 |
| 2ABL | A | ILE | 101 | C | -8.507201  | 8.769529  | -13.293086 | -4.768752 |
| 2ABL | A | THR | 102 | B | -7.946749  | 7.604754  | -13.117767 | -4.827484 |
| 2ABL | A | LYS | 103 | T | -7.942065  | 7.562401  | -13.160841 | -4.837157 |
| 2ABL | A | GLY | 104 | T | -7.949850  | 7.503006  | -13.168746 | -4.844594 |
| 2ABL | A | GLU | 105 | T | -8.032138  | 7.384170  | -13.188809 | -4.906377 |
| 2ABL | A | LYS | 106 | E | -8.189478  | 7.256478  | -13.165136 | -4.975123 |
| 2ABL | A | LEU | 107 | E | -10.077427 | 10.400018 | -14.401688 | -5.147997 |
| 2ABL | A | ARG | 108 | E | -10.984655 | 14.106626 | -13.718356 | -4.896533 |
| 2ABL | A | VAL | 109 | E | -10.836229 | 14.100703 | -13.827108 | -5.017681 |
| 2ABL | A | LEU | 110 | E | -9.760662  | 11.768999 | -13.747438 | -5.421661 |
| 2ABL | A | GLY | 111 | E | -9.216170  | 10.399808 | -14.167362 | -5.570518 |
| 2ABL | A | TYR | 112 | E | -8.870881  | 10.325953 | -14.074343 | -5.681851 |
| 2ABL | A | ASN | 113 | E | -6.618605  | 5.109935  | -12.871363 | -5.454037 |
| 2ABL | A | HIS | 114 | T | -6.543595  | 5.514873  | -12.847317 | -5.464803 |
| 2ABL | A | ASN | 115 | T | -6.543942  | 5.505826  | -12.851327 | -5.465671 |
| 2ABL | A | GLY | 116 | T | -6.547113  | 5.487079  | -12.843245 | -5.464816 |
| 2ABL | A | GLU | 117 | T | -6.552297  | 5.445373  | -12.833744 | -5.461843 |
| 2ABL | A | TRP | 118 | T | -7.781378  | 8.591732  | -12.761854 | -5.552935 |
| 2ABL | A | CYS | 119 | E | -9.717419  | 10.338728 | -15.063280 | -5.776233 |
| 2ABL | A | GLU | 120 | E | -10.248403 | 11.686438 | -15.001944 | -5.698001 |
| 2ABL | A | ALA | 121 | E | -9.353916  | 7.671388  | -14.748212 | -5.114928 |
| 2ABL | A | GLN | 122 | E | -6.550622  | 5.170043  | -12.642591 | -5.424017 |
| 2ABL | A | THR | 123 | E | -5.647680  | 5.422892  | -11.565294 | -5.299705 |
| 2ABL | A | LYS | 124 | E | -5.309202  | 4.695655  | -11.813945 | -5.232136 |
| 2ABL | A | ASN | 125 | T | -5.308687  | 4.699478  | -11.816238 | -5.232482 |
| 2ABL | A | GLY | 126 | T | -5.309201  | 4.697750  | -11.813646 | -5.232603 |
| 2ABL | A | GLN | 127 | E | -5.386281  | 4.635006  | -11.700654 | -5.205445 |
| 2ABL | A | GLY | 128 | E | -5.800710  | 3.765971  | -12.140711 | -5.144593 |
| 2ABL | A | TRP | 129 | E | -9.308540  | 9.910017  | -14.291451 | -5.435496 |
| 2ABL | A | VAL | 130 | E | -9.026477  | 12.299227 | -10.996934 | -4.279660 |
| 2ABL | A | PRO | 131 | E | -8.012097  | 12.461340 | -9.505752  | -4.243563 |
| 2ABL | A | SER | 132 | E | -7.810446  | 12.652376 | -9.622766  | -4.350272 |
| 2ABL | A | ASN | 133 | G | -7.511353  | 13.496469 | -8.983944  | -4.323498 |

|      |   |     |     |   |            |           |            |           |
|------|---|-----|-----|---|------------|-----------|------------|-----------|
| 2ABL | A | TYR | 134 | G | -7.386270  | 13.954687 | -8.707596  | -4.271614 |
| 2ABL | A | ILE | 135 | G | -7.337322  | 13.868423 | -8.745568  | -4.271454 |
| 2ABL | A | THR | 136 | E | -7.481355  | 14.059814 | -8.796784  | -4.284311 |
| 2ABL | A | PRO | 137 | E | -7.585746  | 14.229215 | -8.598177  | -4.220150 |
| 2ABL | A | VAL | 138 | E | -7.937595  | 13.770884 | -9.093558  | -4.172458 |
| 2ABL | A | ASN | 139 | T | -8.327654  | 11.744913 | -10.584736 | -4.297006 |
| 2ABL | A | SER | 140 | T | -8.644515  | 10.168188 | -12.380825 | -4.618409 |
| 2ABL | A | LEU | 141 | T | -8.908136  | 10.529321 | -12.775739 | -4.859309 |
| 2ABL | A | GLU | 142 | G | -8.934530  | 10.490876 | -12.773411 | -4.883567 |
| 2ABL | A | LYS | 143 | G | -8.950155  | 10.443064 | -12.738201 | -4.881604 |
| 2ABL | A | HIS | 144 | G | -8.972854  | 10.438952 | -12.641700 | -4.866106 |
| 2ABL | A | SER | 145 | T | -9.947847  | 9.820763  | -14.142556 | -4.950752 |
| 2ABL | A | TRP | 146 | T | -11.458946 | 12.542363 | -14.976595 | -5.156778 |
| 2ABL | A | TYR | 147 | T | -10.393392 | 13.565098 | -12.260757 | -4.700963 |
| 2ABL | A | HIS | 148 | E | -9.318092  | 10.335676 | -12.605976 | -4.494350 |
| 2ABL | A | GLY | 149 | E | -9.187555  | 10.132049 | -12.840425 | -4.475076 |
| 2ABL | A | PRO | 150 | E | -8.621591  | 9.661664  | -12.198234 | -4.280633 |
| 2ABL | A | VAL | 151 | E | -8.111009  | 8.822985  | -11.958046 | -4.204811 |
| 2ABL | A | SER | 152 | C | -7.682984  | 8.481219  | -11.553840 | -4.133805 |
| 2ABL | A | ARG | 153 | C | -7.561353  | 8.514389  | -11.548685 | -4.174006 |
| 2ABL | A | ASN | 154 | H | -7.422226  | 8.429986  | -11.700644 | -4.270124 |
| 2ABL | A | ALA | 155 | H | -7.450151  | 8.388409  | -11.724810 | -4.281010 |
| 2ABL | A | ALA | 156 | H | -7.572042  | 8.447523  | -11.717171 | -4.312977 |
| 2ABL | A | GLU | 157 | H | -7.894384  | 8.639889  | -12.147689 | -4.493366 |
| 2ABL | A | TYR | 158 | H | -8.036030  | 8.633626  | -12.228013 | -4.418290 |
| 2ABL | A | LEU | 159 | H | -7.898271  | 8.712092  | -11.668077 | -4.225953 |
| 2ABL | A | LEU | 160 | H | -7.662477  | 7.784725  | -11.949169 | -4.205643 |
| 2ABL | A | SER | 161 | H | -7.123451  | 5.377050  | -12.723797 | -4.371453 |
| 2ABL | A | SER | 162 | T | -6.307919  | 4.323602  | -12.293867 | -4.586142 |
| 2ABL | A | GLY | 163 | T | -6.219996  | 4.473035  | -12.382848 | -4.651697 |
| 2ABL | A | ILE | 164 | T | -6.244566  | 4.307652  | -12.420912 | -4.667441 |
| 2ABL | A | ASN | 165 | T | -6.265548  | 4.233027  | -12.416955 | -4.684882 |
| 2ABL | A | GLY | 166 | T | -6.355286  | 4.311234  | -12.280709 | -4.717781 |
| 2ABL | A | SER | 167 | T | -7.344631  | 5.723577  | -12.839903 | -4.974416 |
| 2ABL | A | PHE | 168 | E | -10.477972 | 13.872198 | -12.871063 | -4.756962 |
| 2ABL | A | LEU | 169 | E | -10.965443 | 16.000516 | -11.725207 | -4.587205 |
| 2ABL | A | VAL | 170 | E | -11.016309 | 16.040891 | -11.477174 | -4.526804 |
| 2ABL | A | ARG | 171 | E | -14.635854 | 14.667079 | -19.467090 | -5.697914 |
| 2ABL | A | GLU | 172 | E | -12.354344 | 9.793417  | -17.737928 | -5.434828 |
| 2ABL | A | SER | 173 | E | -10.742860 | 9.445421  | -15.243805 | -4.871967 |
| 2ABL | A | GLU | 174 | T | -10.052808 | 9.021077  | -15.091994 | -4.976408 |
| 2ABL | A | SER | 175 | T | -9.972896  | 8.929022  | -15.312509 | -5.022926 |
| 2ABL | A | SER | 176 | T | -9.955661  | 8.967090  | -15.370947 | -5.042422 |
| 2ABL | A | PRO | 177 | T | -9.961386  | 8.964841  | -15.356104 | -5.043052 |
| 2ABL | A | GLY | 178 | T | -10.130712 | 8.818512  | -15.458256 | -5.114959 |
| 2ABL | A | GLN | 179 | T | -11.040467 | 8.781518  | -17.043961 | -5.447311 |
| 2ABL | A | ARG | 180 | T | -11.896461 | 10.393839 | -17.703178 | -5.778299 |
| 2ABL | A | SER | 181 | E | -12.745717 | 10.843802 | -18.771207 | -6.013064 |
| 2ABL | A | ILE | 182 | E | -13.807681 | 13.204447 | -19.048365 | -6.055592 |
| 2ABL | A | SER | 183 | E | -14.525548 | 16.368126 | -18.225088 | -5.603838 |
| 2ABL | A | LEU | 184 | E | -12.238094 | 13.748828 | -15.753388 | -5.567864 |
| 2ABL | A | ARG | 185 | E | -10.955674 | 10.599484 | -15.388790 | -5.181977 |
| 2ABL | A | TYR | 186 | E | -7.764435  | 10.268926 | -10.708079 | -4.810328 |
| 2ABL | A | GLU | 187 | E | -7.692763  | 10.136593 | -10.922095 | -4.785321 |
| 2ABL | A | GLY | 188 | T | -7.685330  | 10.153811 | -10.953807 | -4.787364 |
| 2ABL | A | ARG | 189 | T | -7.685566  | 10.152510 | -10.951901 | -4.787025 |
| 2ABL | A | VAL | 190 | E | -7.687673  | 10.152358 | -10.936256 | -4.785795 |
| 2ABL | A | TYR | 191 | E | -8.917157  | 9.350981  | -12.675592 | -4.626810 |
| 2ABL | A | HIS | 192 | E | -10.279497 | 11.543894 | -13.482533 | -4.951133 |
| 2ABL | A | TYR | 193 | E | -12.343489 | 14.794400 | -15.183348 | -5.178216 |
| 2ABL | A | ARG | 194 | E | -10.000809 | 11.574490 | -12.818971 | -4.655747 |
| 2ABL | A | ILE | 195 | E | -7.275259  | 9.680137  | -9.555708  | -4.146231 |
| 2ABL | A | ASN | 196 | E | -6.632176  | 7.263472  | -10.681214 | -4.320124 |
| 2ABL | A | THR | 197 | E | -4.371722  | 4.251794  | -8.756289  | -4.170216 |
| 2ABL | A | ALA | 198 | E | -4.239585  | 4.354756  | -9.018525  | -4.262929 |
| 2ABL | A | SER | 199 | T | -4.236825  | 4.367211  | -9.031960  | -4.265242 |
| 2ABL | A | ASP | 200 | T | -4.240311  | 4.335968  | -9.029033  | -4.265951 |
| 2ABL | A | GLY | 201 | T | -4.247288  | 4.315816  | -9.002502  | -4.264182 |
| 2ABL | A | LYS | 202 | T | -5.180298  | 4.815702  | -10.100228 | -4.631755 |
| 2ABL | A | LEU | 203 | C | -7.411442  | 7.096941  | -11.912125 | -4.754683 |
| 2ABL | A | TYR | 204 | E | -10.185871 | 11.449246 | -14.077240 | -5.098442 |
| 2ABL | A | VAL | 205 | E | -8.286658  | 7.587604  | -12.439132 | -4.465372 |
| 2ABL | A | SER | 206 | T | -8.086064  | 7.537657  | -12.759163 | -4.564617 |
| 2ABL | A | SER | 207 | T | -8.072819  | 7.603874  | -12.789702 | -4.574785 |
| 2ABL | A | GLU | 208 | T | -8.071299  | 7.613138  | -12.798224 | -4.577488 |
| 2ABL | A | SER | 209 | T | -8.084156  | 7.541774  | -12.775841 | -4.570791 |
| 2ABL | A | ARG | 210 | T | -8.771872  | 7.716156  | -13.624409 | -4.837215 |
| 2ABL | A | PHE | 211 | E | -9.264282  | 13.934458 | -11.146179 | -4.805170 |
| 2ABL | A | ASN | 212 | E | -6.666222  | 10.895170 | -8.545373  | -4.463311 |
| 2ABL | A | THR | 213 | C | -6.648571  | 10.998924 | -8.563838  | -4.460880 |
| 2ABL | A | LEU | 214 | C | -6.647668  | 11.008026 | -8.566363  | -4.460884 |

|      |   |     |     |   |            |           |            |           |
|------|---|-----|-----|---|------------|-----------|------------|-----------|
| 2ABL | A | ALA | 215 | H | -6.646768  | 11.011535 | -8.571245  | -4.460710 |
| 2ABL | A | GLU | 216 | H | -6.652452  | 10.976261 | -8.554448  | -4.458114 |
| 2ABL | A | LEU | 217 | H | -8.670980  | 14.481216 | -9.436326  | -4.398014 |
| 2ABL | A | VAL | 218 | H | -10.026917 | 15.159777 | -11.265331 | -4.467273 |
| 2ABL | A | HIS | 219 | H | -10.358392 | 13.506616 | -12.326894 | -4.494539 |
| 2ABL | A | HIS | 220 | H | -9.912262  | 9.723730  | -13.752919 | -4.636971 |
| 2ABL | A | HIS | 221 | H | -9.268534  | 9.610273  | -12.992767 | -4.421332 |
| 2ABL | A | SER | 222 | H | -7.978047  | 6.650662  | -12.522120 | -4.271900 |
| 2ABL | A | THR | 223 | H | -5.540154  | 5.246643  | -9.854286  | -4.269769 |
| 2ABL | A | VAL | 224 | H | -5.497150  | 5.510476  | -9.877610  | -4.289309 |
| 2ABL | A | ALA | 225 | C | -5.470872  | 5.742237  | -9.859447  | -4.301385 |
| 2ABL | A | ASP | 226 | T | -5.410672  | 6.400243  | -9.716030  | -4.364476 |
| 2ABL | A | GLY | 227 | T | -5.126802  | 9.391169  | -8.098944  | -4.419127 |
| 2ABL | A | LEU | 228 | T | -5.513693  | 13.479621 | -6.450830  | -4.558492 |
| 2ABL | A | ILE | 229 | T | -5.549950  | 13.877136 | -6.190051  | -4.568892 |
| 2ABL | A | THR | 230 | T | -5.568570  | 14.112020 | -6.079894  | -4.610720 |
| 2ABL | A | THR | 231 | T | -5.580484  | 14.373805 | -6.031486  | -4.685968 |
| 2ABL | A | LEU | 232 | T | -5.231038  | 12.573985 | -6.600684  | -4.872141 |
| 2ABL | A | HIS | 233 | C | -3.381438  | 8.027155  | -5.208469  | -3.897837 |
| 2ABL | A | TYR | 234 | C | -2.508035  | 6.474431  | -4.393737  | -3.222325 |
| 2ABL | A | PRO | 235 | C | -2.508035  | 6.474431  | -4.393737  | -3.222325 |
| 2ABL | A | ALA | 236 | C | -2.508035  | 6.474431  | -4.393737  | -3.222325 |
| 2ABL | A | PRO | 237 | C | -2.508035  | 6.474431  | -4.393737  | -3.222325 |
| 2CPL | A | VAL | 2   | C | -6.212240  | 6.110085  | -9.738762  | -3.783733 |
| 2CPL | A | ASN | 3   | C | -6.212240  | 6.110085  | -9.738762  | -3.783733 |
| 2CPL | A | PRO | 4   | C | -6.212240  | 6.110085  | -9.738762  | -3.783733 |
| 2CPL | A | THR | 5   | E | -6.212240  | 6.110085  | -9.738762  | -3.783733 |
| 2CPL | A | VAL | 6   | E | -8.150705  | 9.098332  | -11.466335 | -4.480886 |
| 2CPL | A | PHE | 7   | E | -11.964029 | 14.714740 | -14.941688 | -5.601824 |
| 2CPL | A | PHE | 8   | E | -13.129229 | 17.815725 | -14.179018 | -4.703111 |
| 2CPL | A | ASP | 9   | E | -10.538088 | 15.121888 | -16.293354 | -8.188452 |
| 2CPL | A | ILE | 10  | E | -8.775572  | 11.371112 | -11.683972 | -4.710645 |
| 2CPL | A | ALA | 11  | E | -5.530569  | 7.379070  | -8.648771  | -4.217545 |
| 2CPL | A | VAL | 12  | E | -3.194620  | 5.839578  | -6.313440  | -4.057240 |
| 2CPL | A | ASP | 13  | T | -3.061291  | 5.955907  | -6.491473  | -4.084906 |
| 2CPL | A | GLY | 14  | T | -2.905368  | 5.927213  | -6.612581  | -4.075263 |
| 2CPL | A | GLU | 15  | E | -2.904689  | 5.929750  | -6.616196  | -4.075262 |
| 2CPL | A | PRO | 16  | E | -2.911726  | 5.912450  | -6.591039  | -4.072808 |
| 2CPL | A | LEU | 17  | E | -3.472182  | 6.023145  | -7.040242  | -4.066930 |
| 2CPL | A | GLY | 18  | E | -3.775711  | 5.781957  | -6.957850  | -3.997057 |
| 2CPL | A | ARG | 19  | E | -6.805212  | 8.661316  | -9.670404  | -4.013121 |
| 2CPL | A | VAL | 20  | E | -7.926402  | 11.365318 | -9.248976  | -3.891286 |
| 2CPL | A | SER | 21  | E | -10.633708 | 12.926072 | -13.110785 | -4.675109 |
| 2CPL | A | PHE | 22  | E | -12.571858 | 15.670518 | -14.646018 | -4.828905 |
| 2CPL | A | GLU | 23  | E | -12.405309 | 16.200016 | -14.715764 | -5.347505 |
| 2CPL | A | LEU | 24  | E | -10.063691 | 14.948723 | -11.304371 | -4.793271 |
| 2CPL | A | PHE | 25  | T | -9.080885  | 13.690879 | -10.795316 | -4.635119 |
| 2CPL | A | ALA | 26  | T | -8.023535  | 9.414360  | -11.096942 | -4.155883 |
| 2CPL | A | ASP | 27  | T | -8.004048  | 9.449634  | -11.186111 | -4.184351 |
| 2CPL | A | LYS | 28  | T | -8.003342  | 9.453893  | -11.190235 | -4.185620 |
| 2CPL | A | VAL | 29  | T | -8.019186  | 9.298687  | -11.198152 | -4.168908 |
| 2CPL | A | PRO | 30  | H | -8.104407  | 8.662363  | -11.285326 | -4.103300 |
| 2CPL | A | LYS | 31  | H | -9.926408  | 10.949204 | -13.923288 | -5.014817 |
| 2CPL | A | THR | 32  | H | -10.974421 | 13.096226 | -14.289843 | -4.916514 |
| 2CPL | A | ALA | 33  | H | -11.150211 | 12.846080 | -14.160576 | -4.789821 |
| 2CPL | A | GLU | 34  | H | -12.083243 | 11.486545 | -16.546396 | -5.326485 |
| 2CPL | A | ASN | 35  | H | -13.705044 | 14.235861 | -18.139369 | -5.793968 |
| 2CPL | A | PHE | 36  | H | -13.895450 | 14.976029 | -17.445977 | -5.650498 |
| 2CPL | A | ARG | 37  | H | -15.026560 | 14.773375 | -19.983715 | -5.857376 |
| 2CPL | A | ALA | 38  | H | -10.511360 | 11.309981 | -13.848928 | -4.871796 |
| 2CPL | A | LEU | 39  | H | -10.022359 | 10.492745 | -14.576116 | -5.197026 |
| 2CPL | A | SER | 40  | H | -8.713666  | 8.225882  | -14.381531 | -5.599465 |
| 2CPL | A | THR | 41  | H | -5.175213  | 6.112479  | -10.423014 | -5.438174 |
| 2CPL | A | GLY | 42  | T | -5.040143  | 6.562647  | -10.404684 | -5.442523 |
| 2CPL | A | GLU | 43  | T | -4.991015  | 6.799732  | -10.399602 | -5.444675 |
| 2CPL | A | LYS | 44  | T | -4.990488  | 6.807265  | -10.399778 | -5.444801 |
| 2CPL | A | GLY | 45  | T | -4.991399  | 6.806295  | -10.393508 | -5.444471 |
| 2CPL | A | PHE | 46  | C | -5.770360  | 8.708935  | -10.337794 | -5.461038 |
| 2CPL | A | GLY | 47  | C | -6.479530  | 9.618088  | -10.369092 | -5.468619 |
| 2CPL | A | TYR | 48  | T | -8.862257  | 13.825070 | -11.957202 | -5.574788 |
| 2CPL | A | LYS | 49  | T | -9.545551  | 11.982363 | -13.889882 | -5.590385 |
| 2CPL | A | GLY | 50  | T | -9.735199  | 11.168958 | -14.259088 | -5.603226 |
| 2CPL | A | SER | 51  | E | -9.787969  | 10.839309 | -14.273196 | -5.590169 |
| 2CPL | A | CYS | 52  | E | -11.507187 | 12.065370 | -16.475246 | -5.724201 |
| 2CPL | A | PHE | 53  | E | -11.737441 | 12.411164 | -16.125205 | -5.640814 |
| 2CPL | A | HIS | 54  | E | -12.525409 | 15.621056 | -14.914077 | -4.920554 |
| 2CPL | A | ARG | 55  | E | -10.013253 | 12.847958 | -11.496777 | -4.168437 |
| 2CPL | A | ILE | 56  | E | -8.854293  | 13.430706 | -10.097513 | -4.262698 |
| 2CPL | A | ILE | 57  | E | -8.625979  | 13.283529 | -10.548271 | -4.484206 |
| 2CPL | A | PRO | 58  | T | -8.598828  | 13.235315 | -10.696820 | -4.522883 |
| 2CPL | A | GLY | 59  | T | -8.599114  | 13.233102 | -10.696822 | -4.523558 |

|      |   |     |     |   |            |           |            |           |
|------|---|-----|-----|---|------------|-----------|------------|-----------|
| 2CPL | A | PHE | 60  | T | -8.655603  | 13.275139 | -10.619982 | -4.559624 |
| 2CPL | A | MET | 61  | E | -9.214536  | 12.855705 | -11.868505 | -5.017209 |
| 2CPL | A | CYS | 62  | E | -10.368008 | 11.965620 | -14.373497 | -5.440201 |
| 2CPL | A | GLN | 63  | E | -11.616134 | 10.275343 | -18.353189 | -6.183357 |
| 2CPL | A | GLY | 64  | E | -10.234389 | 11.779861 | -14.624566 | -5.685078 |
| 2CPL | A | GLY | 65  | C | -9.786822  | 12.382744 | -14.001572 | -5.570560 |
| 2CPL | A | ASP | 66  | T | -9.563449  | 12.128672 | -14.072093 | -5.530504 |
| 2CPL | A | PHE | 67  | T | -8.042698  | 10.717081 | -11.222703 | -4.847644 |
| 2CPL | A | THR | 68  | T | -6.555234  | 6.682209  | -11.329772 | -4.814136 |
| 2CPL | A | ARG | 69  | T | -5.529532  | 5.020963  | -10.644434 | -4.508210 |
| 2CPL | A | HIS | 70  | T | -5.385234  | 4.803388  | -11.065633 | -4.650581 |
| 2CPL | A | ASN | 71  | C | -4.627826  | 3.850255  | -11.157039 | -5.136491 |
| 2CPL | A | GLY | 72  | C | -4.575264  | 4.019083  | -11.215488 | -5.179613 |
| 2CPL | A | THR | 73  | C | -4.592203  | 3.960748  | -11.218850 | -5.193948 |
| 2CPL | A | GLY | 74  | C | -4.701458  | 3.824383  | -11.365442 | -5.346464 |
| 2CPL | A | GLY | 75  | C | -4.743344  | 3.809891  | -11.275024 | -5.359408 |
| 2CPL | A | LYS | 76  | C | -5.972033  | 6.284627  | -11.847338 | -5.612819 |
| 2CPL | A | SER | 77  | B | -7.235234  | 10.355487 | -11.841866 | -5.468819 |
| 2CPL | A | ILE | 78  | T | -6.341544  | 10.703088 | -9.600641  | -5.198039 |
| 2CPL | A | TYR | 79  | T | -6.349190  | 10.710136 | -9.564486  | -5.195748 |
| 2CPL | A | GLY | 80  | B | -6.346455  | 10.703493 | -9.585012  | -5.196829 |
| 2CPL | A | GLU | 81  | C | -6.369102  | 10.596675 | -9.544314  | -5.185075 |
| 2CPL | A | LYS | 82  | C | -6.420819  | 10.559869 | -9.407261  | -5.179000 |
| 2CPL | A | PHE | 83  | B | -9.041647  | 11.340633 | -13.382771 | -5.583711 |
| 2CPL | A | GLU | 84  | C | -9.447396  | 10.063055 | -13.921520 | -5.465581 |
| 2CPL | A | ASP | 85  | C | -11.561995 | 11.938177 | -16.402635 | -5.539253 |
| 2CPL | A | GLU | 86  | C | -10.571283 | 13.378083 | -13.447003 | -5.135759 |
| 2CPL | A | ASN | 87  | C | -9.070982  | 13.033812 | -11.132254 | -4.741107 |
| 2CPL | A | PHE | 88  | C | -8.996120  | 13.327833 | -11.166354 | -4.768946 |
| 2CPL | A | ILE | 89  | C | -8.229686  | 12.346097 | -10.736489 | -4.730198 |
| 2CPL | A | LEU | 90  | C | -8.032753  | 12.302560 | -10.931242 | -4.843058 |
| 2CPL | A | LYS | 91  | C | -6.824106  | 10.393029 | -9.924765  | -4.854291 |
| 2CPL | A | HIS | 92  | C | -6.060430  | 9.348802  | -9.690128  | -4.894121 |
| 2CPL | A | THR | 93  | C | -4.865937  | 8.464245  | -7.724580  | -4.332297 |
| 2CPL | A | GLY | 94  | T | -4.863766  | 8.471358  | -7.730206  | -4.330918 |
| 2CPL | A | PRO | 95  | T | -4.864438  | 8.467146  | -7.726046  | -4.329836 |
| 2CPL | A | GLY | 96  | T | -4.883659  | 8.412708  | -7.658187  | -4.312399 |
| 2CPL | A | ILE | 97  | E | -4.946240  | 8.348717  | -7.440223  | -4.245867 |
| 2CPL | A | LEU | 98  | E | -7.861408  | 11.081081 | -9.858400  | -4.263762 |
| 2CPL | A | SER | 99  | E | -9.857231  | 12.283399 | -11.845815 | -4.352545 |
| 2CPL | A | MET | 100 | E | -10.103192 | 8.493140  | -15.515366 | -5.384870 |
| 2CPL | A | ALA | 101 | E | -6.635681  | 4.584729  | -11.947121 | -4.535321 |
| 2CPL | A | ASN | 102 | E | -6.025551  | 4.213730  | -12.197896 | -4.800651 |
| 2CPL | A | ALA | 103 | C | -4.449270  | 4.711568  | -9.252162  | -4.509654 |
| 2CPL | A | GLY | 104 | T | -4.448529  | 4.714184  | -9.258279  | -4.510744 |
| 2CPL | A | PRO | 105 | T | -4.448386  | 4.715034  | -9.259438  | -4.510946 |
| 2CPL | A | ASN | 106 | T | -4.463314  | 4.718529  | -9.190891  | -4.510268 |
| 2CPL | A | THR | 107 | T | -4.491261  | 4.752636  | -9.038501  | -4.488911 |
| 2CPL | A | ASN | 108 | E | -8.276402  | 7.102500  | -14.197330 | -5.374001 |
| 2CPL | A | GLY | 109 | E | -9.226049  | 8.297116  | -14.425690 | -5.360623 |
| 2CPL | A | SER | 110 | E | -11.851770 | 9.809048  | -18.129781 | -6.021575 |
| 2CPL | A | GLN | 111 | E | -13.186294 | 10.630454 | -19.740344 | -6.321490 |
| 2CPL | A | PHE | 112 | E | -13.414828 | 20.780287 | -13.624400 | -5.439553 |
| 2CPL | A | PHE | 113 | E | -12.171224 | 17.591076 | -13.192424 | -5.048910 |
| 2CPL | A | ILE | 114 | E | -10.409048 | 13.516971 | -12.814489 | -4.964485 |
| 2CPL | A | CYS | 115 | E | -9.842418  | 12.240650 | -13.363803 | -5.126267 |
| 2CPL | A | THR | 116 | C | -9.398826  | 11.781551 | -13.281695 | -5.140640 |
| 2CPL | A | ALA | 117 | C | -9.164432  | 11.017187 | -13.523104 | -5.075950 |
| 2CPL | A | LYS | 118 | C | -9.021888  | 11.157740 | -13.461561 | -5.102127 |
| 2CPL | A | THR | 119 | C | -9.014897  | 11.026100 | -13.601978 | -5.158816 |
| 2CPL | A | GLU | 120 | G | -8.819455  | 10.796694 | -13.546937 | -5.264778 |
| 2CPL | A | TRP | 121 | G | -8.529302  | 10.620309 | -13.054388 | -5.211764 |
| 2CPL | A | LEU | 122 | G | -8.541302  | 10.787710 | -13.013808 | -5.249106 |
| 2CPL | A | ASP | 123 | T | -8.594147  | 10.682495 | -13.019934 | -5.253884 |
| 2CPL | A | GLY | 124 | T | -8.614430  | 10.660417 | -12.962941 | -5.228273 |
| 2CPL | A | LYS | 125 | T | -8.805697  | 10.703887 | -12.762162 | -5.143621 |
| 2CPL | A | HIS | 126 | T | -9.768066  | 11.459966 | -13.813140 | -5.164197 |
| 2CPL | A | VAL | 127 | C | -10.444090 | 13.651677 | -13.394713 | -4.761993 |
| 2CPL | A | VAL | 128 | E | -10.274452 | 15.879061 | -11.613037 | -4.517497 |
| 2CPL | A | PHE | 129 | E | -9.670472  | 15.847079 | -11.236794 | -5.080869 |
| 2CPL | A | GLY | 130 | E | -8.352003  | 10.251661 | -12.441063 | -5.280722 |
| 2CPL | A | LYS | 131 | E | -7.583775  | 9.710726  | -11.999567 | -5.324073 |
| 2CPL | A | VAL | 132 | E | -7.442902  | 9.773902  | -12.077592 | -5.334222 |
| 2CPL | A | LYS | 133 | E | -7.345669  | 9.542686  | -12.359183 | -5.407221 |
| 2CPL | A | GLU | 134 | E | -7.192913  | 9.273557  | -12.280008 | -5.273664 |
| 2CPL | A | GLY | 135 | C | -7.207489  | 9.424595  | -12.093827 | -5.185925 |
| 2CPL | A | MET | 136 | H | -7.477483  | 9.419946  | -12.254697 | -5.071248 |
| 2CPL | A | ASN | 137 | H | -7.617956  | 9.263959  | -12.233538 | -4.973454 |
| 2CPL | A | ILE | 138 | H | -7.783893  | 9.536814  | -11.706623 | -4.709813 |
| 2CPL | A | VAL | 139 | H | -8.399890  | 11.088049 | -11.212118 | -4.469275 |
| 2CPL | A | GLU | 140 | H | -9.266501  | 11.105703 | -12.505107 | -4.486347 |

|      |   |     |     |   |            |           |            |           |
|------|---|-----|-----|---|------------|-----------|------------|-----------|
| 2CPL | A | ALA | 141 | H | -9.853461  | 11.100376 | -13.081694 | -4.476418 |
| 2CPL | A | MET | 142 | H | -10.754045 | 12.812375 | -14.352987 | -5.029357 |
| 2CPL | A | GLU | 143 | H | -10.804195 | 12.452992 | -14.548907 | -5.058866 |
| 2CPL | A | ARG | 144 | H | -10.170183 | 10.224386 | -13.877232 | -4.300449 |
| 2CPL | A | PHE | 145 | C | -9.008370  | 8.504579  | -12.979584 | -4.349834 |
| 2CPL | A | GLY | 146 | C | -5.434879  | 4.016836  | -10.293402 | -4.221618 |
| 2CPL | A | SER | 147 | T | -5.372857  | 3.947381  | -10.480300 | -4.208086 |
| 2CPL | A | ARG | 148 | T | -5.220790  | 4.251696  | -10.591725 | -4.298488 |
| 2CPL | A | ASN | 149 | T | -5.215362  | 4.258602  | -10.624688 | -4.306323 |
| 2CPL | A | GLY | 150 | T | -5.213934  | 4.261759  | -10.634314 | -4.309227 |
| 2CPL | A | LYS | 151 | C | -5.901425  | 4.827366  | -11.401144 | -4.502801 |
| 2CPL | A | THR | 152 | T | -6.059514  | 5.384131  | -11.165847 | -4.646319 |
| 2CPL | A | SER | 153 | T | -7.641018  | 6.763341  | -13.847554 | -5.191514 |
| 2CPL | A | LYS | 154 | T | -8.118949  | 8.904834  | -13.413662 | -5.259259 |
| 2CPL | A | LYS | 155 | T | -8.552243  | 11.420678 | -12.817662 | -5.445211 |
| 2CPL | A | ILE | 156 | E | -8.622340  | 12.063170 | -12.403551 | -5.419770 |
| 2CPL | A | THR | 157 | E | -9.535626  | 11.931384 | -13.270533 | -4.883705 |
| 2CPL | A | ILE | 158 | E | -9.990854  | 12.870266 | -13.010617 | -4.647967 |
| 2CPL | A | ALA | 159 | E | -10.073644 | 12.698158 | -13.042496 | -4.642231 |
| 2CPL | A | ASP | 160 | E | -10.085294 | 12.493674 | -13.529224 | -4.936640 |
| 2CPL | A | CYS | 161 | E | -9.187029  | 9.925490  | -14.266827 | -5.703929 |
| 2CPL | A | GLY | 162 | E | -6.589429  | 7.988443  | -10.201631 | -4.578789 |
| 2CPL | A | GLN | 163 | E | -6.589429  | 7.988443  | -10.201631 | -4.578789 |
| 2CPL | A | LEU | 164 | C | -6.589429  | 7.988443  | -10.201631 | -4.578789 |
| 2CPL | A | GLU | 165 | C | -6.589429  | 7.988443  | -10.201631 | -4.578789 |
| 2FCB | A | ALA | 6   | C | -3.872827  | 4.643147  | -6.878085  | -3.219337 |
| 2FCB | A | PRO | 7   | C | -3.872827  | 4.643147  | -6.878085  | -3.219337 |
| 2FCB | A | PRO | 8   | C | -3.872827  | 4.643147  | -6.878085  | -3.219337 |
| 2FCB | A | LYS | 9   | B | -3.872827  | 4.643147  | -6.878085  | -3.219337 |
| 2FCB | A | ALA | 10  | C | -5.336358  | 6.617996  | -8.372736  | -3.822373 |
| 2FCB | A | VAL | 11  | E | -7.225765  | 8.065197  | -11.082969 | -4.643002 |
| 2FCB | A | LEU | 12  | E | -9.245450  | 12.560956 | -12.848535 | -5.585987 |
| 2FCB | A | LYS | 13  | E | -10.208674 | 12.027267 | -14.002494 | -4.771331 |
| 2FCB | A | LEU | 14  | E | -9.524108  | 13.587628 | -11.953503 | -4.758028 |
| 2FCB | A | GLU | 15  | E | -9.533559  | 13.616165 | -11.930712 | -4.763995 |
| 2FCB | A | PRO | 16  | T | -9.580354  | 13.685348 | -11.795477 | -4.759041 |
| 2FCB | A | GLN | 17  | T | -9.619212  | 13.716042 | -11.698754 | -4.774012 |
| 2FCB | A | TRP | 18  | T | -9.707775  | 14.280340 | -11.243452 | -4.784603 |
| 2FCB | A | ILE | 19  | T | -11.462528 | 14.250353 | -13.620369 | -4.751667 |
| 2FCB | A | ASN | 20  | E | -12.887739 | 15.970561 | -15.741219 | -5.169050 |
| 2FCB | A | VAL | 21  | E | -13.073172 | 15.205955 | -16.683768 | -5.301595 |
| 2FCB | A | LEU | 22  | E | -12.954562 | 14.042918 | -17.326809 | -5.418983 |
| 2FCB | A | GLN | 23  | T | -12.619041 | 12.218000 | -17.846937 | -5.454756 |
| 2FCB | A | GLU | 24  | T | -11.453216 | 11.234661 | -15.826088 | -5.183857 |
| 2FCB | A | ASP | 25  | E | -11.325524 | 11.636927 | -15.587284 | -5.068634 |
| 2FCB | A | SER | 26  | E | -10.637153 | 13.258617 | -13.271882 | -4.633023 |
| 2FCB | A | VAL | 27  | E | -10.281557 | 13.669229 | -12.868251 | -4.678011 |
| 2FCB | A | THR | 28  | E | -10.247896 | 13.605216 | -13.001792 | -4.705539 |
| 2FCB | A | LEU | 29  | E | -9.735550  | 12.182741 | -13.211054 | -4.887495 |
| 2FCB | A | THR | 30  | E | -8.395960  | 8.823321  | -13.199521 | -5.155095 |
| 2FCB | A | CYS | 31  | E | -7.022104  | 7.759306  | -11.752532 | -5.080613 |
| 2FCB | A | ARG | 32  | E | -5.773983  | 7.310818  | -9.631660  | -4.501449 |
| 2FCB | A | GLY | 33  | C | -3.053557  | 6.234271  | -6.141667  | -4.267235 |
| 2FCB | A | THR | 34  | C | -2.904161  | 6.247373  | -6.328829  | -4.254718 |
| 2FCB | A | HIS | 35  | C | -2.887896  | 6.242401  | -6.392658  | -4.252851 |
| 2FCB | A | SER | 36  | C | -2.871678  | 6.216723  | -6.462187  | -4.251279 |
| 2FCB | A | PRO | 37  | C | -2.875015  | 6.208746  | -6.447702  | -4.249935 |
| 2FCB | A | GLU | 38  | T | -3.662118  | 6.101974  | -7.319261  | -4.162749 |
| 2FCB | A | SER | 39  | T | -4.593858  | 5.627889  | -8.851218  | -4.152207 |
| 2FCB | A | ASP | 40  | T | -4.977496  | 5.305815  | -9.070134  | -4.174161 |
| 2FCB | A | SER | 41  | T | -6.861717  | 6.121875  | -11.783197 | -4.537177 |
| 2FCB | A | ILE | 42  | C | -8.024405  | 8.574023  | -13.122384 | -5.317321 |
| 2FCB | A | GLN | 43  | E | -9.571587  | 9.419277  | -13.917571 | -5.070314 |
| 2FCB | A | TRP | 44  | E | -12.398075 | 15.862332 | -16.368293 | -6.262610 |
| 2FCB | A | PHE | 45  | E | -8.799391  | 8.365278  | -13.591635 | -5.161172 |
| 2FCB | A | HIS | 46  | E | -5.809048  | 6.739499  | -10.023060 | -4.752623 |
| 2FCB | A | ASN | 47  | T | -5.620158  | 7.120958  | -9.927613  | -4.685382 |
| 2FCB | A | GLY | 48  | T | -5.190976  | 7.192014  | -9.146671  | -4.308306 |
| 2FCB | A | ASN | 49  | E | -4.815893  | 7.032246  | -8.511300  | -3.993553 |
| 2FCB | A | LEU | 50  | E | -4.026524  | 8.324744  | -6.285832  | -3.761821 |
| 2FCB | A | ILE | 51  | T | -3.941063  | 8.368383  | -6.242406  | -3.728390 |
| 2FCB | A | PRO | 52  | T | -3.949625  | 8.369118  | -6.196070  | -3.716604 |
| 2FCB | A | THR | 53  | T | -3.988523  | 8.443191  | -6.044917  | -3.699973 |
| 2FCB | A | HIS | 54  | T | -4.061765  | 8.650550  | -5.813791  | -3.707377 |
| 2FCB | A | THR | 55  | C | -4.962866  | 8.160875  | -6.972487  | -3.809592 |
| 2FCB | A | GLN | 56  | T | -7.702553  | 6.830776  | -11.866136 | -4.318937 |
| 2FCB | A | PRO | 57  | T | -10.465377 | 9.190771  | -14.751651 | -4.507457 |
| 2FCB | A | SER | 58  | E | -11.647373 | 14.279894 | -14.990294 | -5.078449 |
| 2FCB | A | TYR | 59  | E | -11.682753 | 15.642382 | -14.271829 | -5.078986 |
| 2FCB | A | ARG | 60  | E | -11.147449 | 13.042001 | -14.750713 | -4.984437 |
| 2FCB | A | PHE | 61  | E | -11.165143 | 12.962049 | -14.770015 | -4.993147 |

|      |   |     |     |   |            |           |            |           |
|------|---|-----|-----|---|------------|-----------|------------|-----------|
| 2FCB | A | LYS | 62  | E | -10.139511 | 6.582083  | -16.611803 | -5.149632 |
| 2FCB | A | ALA | 63  | E | -9.273938  | 5.715234  | -15.999313 | -5.150278 |
| 2FCB | A | ASN | 64  | C | -9.181641  | 5.548782  | -16.244053 | -5.184703 |
| 2FCB | A | ASN | 65  | G | -9.173865  | 5.376038  | -16.372141 | -5.200720 |
| 2FCB | A | ASN | 66  | G | -9.170095  | 5.379649  | -16.391271 | -5.202598 |
| 2FCB | A | ASP | 67  | G | -9.275194  | 5.378590  | -16.282202 | -5.207563 |
| 2FCB | A | SER | 68  | C | -10.165885 | 4.755365  | -17.984650 | -5.404276 |
| 2FCB | A | GLY | 69  | E | -11.000049 | 5.349237  | -18.999941 | -5.517006 |
| 2FCB | A | GLU | 70  | E | -11.821779 | 9.143930  | -18.255654 | -5.614032 |
| 2FCB | A | TYR | 71  | E | -12.364805 | 13.505903 | -16.596848 | -5.805034 |
| 2FCB | A | THR | 72  | E | -11.401449 | 10.272927 | -17.579299 | -6.160167 |
| 2FCB | A | CYS | 73  | E | -10.993322 | 9.036220  | -18.331900 | -6.363401 |
| 2FCB | A | GLN | 74  | E | -9.415476  | 9.891699  | -15.267312 | -6.277172 |
| 2FCB | A | THR | 75  | T | -8.713291  | 9.273760  | -14.523190 | -5.896267 |
| 2FCB | A | GLY | 76  | T | -8.647394  | 9.186431  | -14.633223 | -5.861480 |
| 2FCB | A | GLN | 77  | T | -8.651612  | 9.184889  | -14.610886 | -5.858421 |
| 2FCB | A | THR | 78  | T | -8.642436  | 9.208257  | -14.596512 | -5.839655 |
| 2FCB | A | SER | 79  | B | -8.280612  | 8.856717  | -13.322817 | -5.168433 |
| 2FCB | A | LEU | 80  | C | -8.159053  | 9.526389  | -12.194961 | -4.693924 |
| 2FCB | A | SER | 81  | C | -7.907450  | 9.431004  | -11.915681 | -4.566887 |
| 2FCB | A | ASP | 82  | C | -7.777511  | 9.972723  | -11.544173 | -4.473138 |
| 2FCB | A | PRO | 83  | C | -7.625535  | 10.824866 | -10.883264 | -4.344279 |
| 2FCB | A | VAL | 84  | E | -7.745126  | 11.389451 | -10.467887 | -4.226923 |
| 2FCB | A | HIS | 85  | E | -7.891053  | 11.722705 | -10.210081 | -4.159357 |
| 2FCB | A | LEU | 86  | E | -8.151899  | 13.206858 | -9.374423  | -4.013345 |
| 2FCB | A | THR | 87  | E | -8.376524  | 13.604686 | -9.317548  | -4.047625 |
| 2FCB | A | VAL | 88  | E | -9.365655  | 13.409307 | -11.917916 | -4.603894 |
| 2FCB | A | LEU | 89  | E | -9.517521  | 12.953142 | -12.547611 | -4.837584 |
| 2FCB | A | SER | 90  | C | -9.597095  | 12.726226 | -12.838255 | -4.963708 |
| 2FCB | A | GLU | 91  | C | -9.706638  | 12.402237 | -13.050317 | -5.056512 |
| 2FCB | A | TRP | 92  | C | -10.554117 | 16.089063 | -12.867589 | -5.342094 |
| 2FCB | A | LEU | 93  | E | -10.767962 | 16.781199 | -12.567406 | -5.353262 |
| 2FCB | A | VAL | 94  | E | -11.085112 | 16.966521 | -12.474148 | -5.264101 |
| 2FCB | A | LEU | 95  | E | -11.928481 | 17.031949 | -14.178881 | -5.337083 |
| 2FCB | A | GLN | 96  | E | -11.429477 | 13.849563 | -14.808835 | -5.248506 |
| 2FCB | A | THR | 97  | C | -8.272059  | 12.512563 | -10.063270 | -4.696812 |
| 2FCB | A | PRO | 98  | C | -8.235550  | 12.573040 | -10.157045 | -4.697373 |
| 2FCB | A | HIS | 99  | C | -8.229607  | 12.580949 | -10.191226 | -4.702028 |
| 2FCB | A | LEU | 100 | C | -8.228688  | 12.591119 | -10.200669 | -4.707936 |
| 2FCB | A | GLU | 101 | E | -8.227292  | 12.595698 | -10.211186 | -4.712189 |
| 2FCB | A | PHE | 102 | E | -9.668103  | 13.515854 | -12.498559 | -4.974607 |
| 2FCB | A | GLN | 103 | T | -8.262841  | 9.806698  | -12.310528 | -5.232397 |
| 2FCB | A | GLU | 104 | T | -7.765568  | 11.016145 | -11.360731 | -5.165672 |
| 2FCB | A | GLY | 105 | T | -6.527581  | 11.529046 | -8.791487  | -4.771412 |
| 2FCB | A | GLU | 106 | b | -6.515648  | 11.604046 | -8.796048  | -4.766451 |
| 2FCB | A | THR | 107 | C | -6.515500  | 11.607354 | -8.794789  | -4.765992 |
| 2FCB | A | ILE | 108 | E | -6.546342  | 11.710079 | -8.610305  | -4.741524 |
| 2FCB | A | VAL | 109 | E | -6.591347  | 11.691267 | -8.448337  | -4.712015 |
| 2FCB | A | LEU | 110 | E | -8.800354  | 15.299528 | -9.203284  | -4.544740 |
| 2FCB | A | ARG | 111 | E | -10.666373 | 16.049501 | -11.380291 | -4.626011 |
| 2FCB | A | CYS | 112 | E | -12.174749 | 14.993520 | -14.523426 | -4.985804 |
| 2FCB | A | HIS | 113 | E | -12.327842 | 12.680397 | -17.420857 | -6.077414 |
| 2FCB | A | SER | 114 | E | -9.928905  | 12.695375 | -13.717549 | -5.908079 |
| 2FCB | A | TRP | 115 | G | -8.442339  | 10.470453 | -12.648657 | -5.513096 |
| 2FCB | A | LYS | 116 | G | -7.190228  | 10.136817 | -10.924329 | -5.249964 |
| 2FCB | A | ASP | 117 | G | -7.068296  | 10.069831 | -10.971966 | -5.142694 |
| 2FCB | A | LYS | 118 | C | -7.048940  | 10.110274 | -10.997147 | -5.128737 |
| 2FCB | A | PRO | 119 | C | -7.038351  | 10.135454 | -10.968233 | -5.091472 |
| 2FCB | A | LEU | 120 | E | -7.090366  | 10.131849 | -10.820876 | -5.053697 |
| 2FCB | A | VAL | 121 | E | -7.894414  | 10.255055 | -11.207673 | -4.591263 |
| 2FCB | A | LYS | 122 | E | -8.715697  | 11.692753 | -11.288900 | -4.345264 |
| 2FCB | A | VAL | 123 | E | -9.172519  | 12.112023 | -10.724535 | -3.917624 |
| 2FCB | A | THR | 124 | E | -10.698587 | 14.962867 | -11.774483 | -4.376796 |
| 2FCB | A | PHE | 125 | E | -12.028044 | 16.828395 | -12.867117 | -4.634346 |
| 2FCB | A | PHE | 126 | E | -10.323589 | 8.963082  | -15.955773 | -5.757572 |
| 2FCB | A | GLN | 127 | E | -7.637080  | 6.087506  | -13.509770 | -5.364805 |
| 2FCB | A | ASN | 128 | T | -5.415868  | 5.721958  | -10.321130 | -4.909141 |
| 2FCB | A | GLY | 129 | T | -5.400409  | 5.771180  | -10.370593 | -4.914234 |
| 2FCB | A | LYS | 130 | E | -5.397287  | 5.794702  | -10.380043 | -4.915533 |
| 2FCB | A | SER | 131 | E | -5.396320  | 5.804427  | -10.382816 | -4.916168 |
| 2FCB | A | LYS | 132 | E | -5.408354  | 5.809938  | -10.316207 | -4.905852 |
| 2FCB | A | LYS | 133 | E | -7.373127  | 8.416904  | -12.266907 | -5.100836 |
| 2FCB | A | PHE | 134 | E | -8.048910  | 10.140780 | -12.413677 | -4.970516 |
| 2FCB | A | SER | 135 | E | -8.288057  | 9.362674  | -12.751164 | -4.599958 |
| 2FCB | A | ARG | 136 | T | -7.953352  | 7.384090  | -12.531311 | -4.125380 |
| 2FCB | A | SER | 137 | T | -8.070763  | 6.732828  | -12.590444 | -3.959120 |
| 2FCB | A | ASP | 138 | T | -8.090757  | 6.691145  | -12.560178 | -3.958335 |
| 2FCB | A | PRO | 139 | C | -8.167937  | 6.566737  | -12.494419 | -3.941635 |
| 2FCB | A | ASN | 140 | E | -8.235645  | 6.965469  | -12.315044 | -4.022097 |
| 2FCB | A | PHE | 141 | E | -7.982782  | 13.212271 | -8.952647  | -4.278202 |
| 2FCB | A | SER | 142 | E | -6.782017  | 10.461998 | -8.364857  | -3.801487 |



|      |   |     |     |   |            |           |            |           |
|------|---|-----|-----|---|------------|-----------|------------|-----------|
| 2FCB | A | ILE | 143 | E | -6.727544  | 10.336937 | -8.604809  | -3.837171 |
| 2FCB | A | PRO | 144 | T | -6.713537  | 10.241971 | -8.721451  | -3.848415 |
| 2FCB | A | GLN | 145 | T | -6.713039  | 10.207547 | -8.741303  | -3.847940 |
| 2FCB | A | ALA | 146 | b | -6.781876  | 9.828746  | -8.749219  | -3.798894 |
| 2FCB | A | ASN | 147 | C | -7.981540  | 8.393920  | -11.872733 | -4.257581 |
| 2FCB | A | HIS | 148 | G | -8.766338  | 6.519973  | -13.984088 | -4.380313 |
| 2FCB | A | SER | 149 | G | -9.640157  | 6.356512  | -15.480099 | -4.547172 |
| 2FCB | A | HIS | 150 | G | -10.393918 | 6.680307  | -16.397674 | -4.705611 |
| 2FCB | A | SER | 151 | C | -11.266814 | 5.902953  | -18.394266 | -5.023452 |
| 2FCB | A | GLY | 152 | E | -11.921717 | 6.469439  | -19.227119 | -5.234343 |
| 2FCB | A | ASP | 153 | E | -12.768829 | 10.567754 | -19.078139 | -5.653892 |
| 2FCB | A | TYR | 154 | E | -12.469732 | 13.803646 | -16.977768 | -5.809220 |
| 2FCB | A | HIS | 155 | E | -11.733771 | 11.143081 | -17.465031 | -5.890977 |
| 2FCB | A | CYS | 156 | E | -10.798900 | 11.980477 | -16.287437 | -6.169713 |
| 2FCB | A | THR | 157 | E | -9.252149  | 10.855523 | -13.479974 | -5.434632 |
| 2FCB | A | GLY | 158 | E | -7.223540  | 7.682232  | -11.628743 | -4.888621 |
| 2FCB | A | ASN | 159 | E | -5.584588  | 8.298690  | -9.000824  | -4.702611 |
| 2FCB | A | ILE | 160 | E | -3.511682  | 7.974325  | -5.795469  | -4.197255 |
| 2FCB | A | GLY | 161 | T | -3.502658  | 7.981153  | -5.843129  | -4.200966 |
| 2FCB | A | TYR | 162 | T | -3.501984  | 7.983303  | -5.847730  | -4.201137 |
| 2FCB | A | THR | 163 | E | -3.503053  | 7.984018  | -5.837386  | -4.199889 |
| 2FCB | A | LEU | 164 | E | -3.519922  | 7.972539  | -5.750261  | -4.185099 |
| 2FCB | A | TYR | 165 | E | -5.943237  | 8.499506  | -9.008575  | -4.418995 |
| 2FCB | A | SER | 166 | E | -7.439860  | 9.861370  | -10.262884 | -4.397022 |
| 2FCB | A | SER | 167 | C | -8.193032  | 9.375821  | -11.971806 | -4.474330 |
| 2FCB | A | LYS | 168 | B | -7.923873  | 10.417447 | -11.057368 | -4.319483 |
| 2FCB | A | PRO | 169 | C | -7.226387  | 12.115119 | -8.849921  | -4.089211 |
| 2FCB | A | VAL | 170 | E | -7.197771  | 12.204981 | -8.851857  | -4.079178 |
| 2FCB | A | THR | 171 | E | -7.221720  | 12.352094 | -8.701538  | -4.069711 |
| 2FCB | A | ILE | 172 | E | -7.288878  | 12.891019 | -8.358118  | -4.068020 |
| 2FCB | A | THR | 173 | E | -6.851929  | 11.376373 | -9.292170  | -4.551436 |
| 2FCB | A | VAL | 174 | E | -5.707701  | 8.504341  | -8.150432  | -3.950321 |
| 2FCB | A | GLN | 175 | C | -3.860525  | 5.500162  | -6.383959  | -3.263390 |
| 2FCB | A | ALA | 176 | C | -3.860525  | 5.500162  | -6.383959  | -3.263390 |
| 2FCB | A | PRO | 177 | C | -3.860525  | 5.500162  | -6.383959  | -3.263390 |
| 2FCB | A | ALA | 178 | C | -3.860525  | 5.500162  | -6.383959  | -3.263390 |
| 2FHA | A | THR | 5   | C | -3.022834  | 2.631436  | -6.691494  | -3.268201 |
| 2FHA | A | SER | 6   | T | -3.022834  | 2.631436  | -6.691494  | -3.268201 |
| 2FHA | A | GLN | 7   | T | -3.022834  | 2.631436  | -6.691494  | -3.268201 |
| 2FHA | A | VAL | 8   | T | -3.022834  | 2.631436  | -6.691494  | -3.268201 |
| 2FHA | A | ARG | 9   | T | -6.061134  | 4.449968  | -11.464380 | -4.468615 |
| 2FHA | A | GLN | 10  | T | -7.218309  | 4.905005  | -13.483199 | -5.230234 |
| 2FHA | A | ASN | 11  | T | -9.233238  | 5.427303  | -17.282607 | -6.289863 |
| 2FHA | A | TYR | 12  | T | -10.830429 | 11.388604 | -16.778803 | -6.251861 |
| 2FHA | A | HIS | 13  | C | -10.610431 | 10.834352 | -16.733881 | -6.100819 |
| 2FHA | A | GLN | 14  | H | -10.491313 | 10.277191 | -16.900654 | -5.995177 |
| 2FHA | A | ASP | 15  | H | -10.591307 | 10.216302 | -16.888152 | -5.968692 |
| 2FHA | A | SER | 16  | H | -10.852374 | 9.452293  | -17.281547 | -5.816573 |
| 2FHA | A | GLU | 17  | H | -10.911354 | 9.057337  | -17.358775 | -5.782323 |
| 2FHA | A | ALA | 18  | H | -11.304400 | 8.461364  | -17.538387 | -5.323088 |
| 2FHA | A | ALA | 19  | H | -12.105599 | 10.081553 | -16.912992 | -4.591601 |
| 2FHA | A | ILE | 20  | H | -12.230556 | 10.223562 | -16.477725 | -4.392344 |
| 2FHA | A | ASN | 21  | H | -12.351011 | 9.792878  | -16.314289 | -4.221376 |
| 2FHA | A | ARG | 22  | H | -12.361331 | 9.824145  | -16.245640 | -4.204018 |
| 2FHA | A | GLN | 23  | H | -14.361548 | 13.284564 | -19.306684 | -5.475140 |
| 2FHA | A | ILE | 24  | H | -13.864132 | 15.336999 | -17.481486 | -5.478023 |
| 2FHA | A | ASN | 25  | H | -13.854905 | 15.420771 | -17.473580 | -5.492213 |
| 2FHA | A | LEU | 26  | H | -13.665952 | 16.090853 | -17.028434 | -5.431449 |
| 2FHA | A | GLU | 27  | H | -13.773996 | 16.842572 | -16.650754 | -5.448435 |
| 2FHA | A | LEU | 28  | H | -13.539218 | 17.688443 | -15.853082 | -5.301179 |
| 2FHA | A | TYR | 29  | H | -13.177631 | 17.744352 | -14.605890 | -4.886303 |
| 2FHA | A | ALA | 30  | H | -13.042606 | 18.064062 | -14.501286 | -4.916096 |
| 2FHA | A | SER | 31  | H | -13.024950 | 18.050111 | -14.517414 | -4.924166 |
| 2FHA | A | TYR | 32  | H | -12.905643 | 17.987244 | -14.559700 | -4.927801 |
| 2FHA | A | VAL | 33  | H | -12.857007 | 17.686799 | -14.732669 | -4.968873 |
| 2FHA | A | TYR | 34  | H | -13.126549 | 17.849822 | -15.167534 | -5.141818 |
| 2FHA | A | LEU | 35  | H | -12.716779 | 14.722410 | -16.139283 | -5.233453 |
| 2FHA | A | SER | 36  | H | -12.758206 | 14.500883 | -16.187186 | -5.235387 |
| 2FHA | A | MET | 37  | H | -12.848771 | 14.012222 | -16.408572 | -5.286845 |
| 2FHA | A | SER | 38  | H | -12.938557 | 13.626468 | -16.567291 | -5.304014 |
| 2FHA | A | TYR | 39  | H | -12.927452 | 13.794325 | -16.570076 | -5.336341 |
| 2FHA | A | TYR | 40  | H | -13.574254 | 18.194514 | -17.002168 | -6.193562 |
| 2FHA | A | PHE | 41  | H | -9.240899  | 10.350389 | -12.150658 | -4.480122 |
| 2FHA | A | ASP | 42  | H | -6.292327  | 5.963244  | -10.194783 | -4.092507 |
| 2FHA | A | ARG | 43  | T | -5.626927  | 5.392230  | -9.877938  | -3.902919 |
| 2FHA | A | ASP | 44  | T | -5.359288  | 6.084425  | -9.515617  | -3.924028 |
| 2FHA | A | ASP | 45  | T | -5.345991  | 6.126121  | -9.539000  | -3.923981 |
| 2FHA | A | VAL | 46  | T | -5.345394  | 6.129741  | -9.540122  | -3.923886 |
| 2FHA | A | ALA | 47  | T | -5.478249  | 6.179189  | -9.378623  | -3.882007 |
| 2FHA | A | LEU | 48  | C | -5.919314  | 7.352905  | -8.995265  | -3.959743 |
| 2FHA | A | LYS | 49  | H | -7.534176  | 8.212917  | -10.686147 | -3.955144 |

|      |   |     |     |   |            |           |            |           |
|------|---|-----|-----|---|------------|-----------|------------|-----------|
| 2FHA | A | ASN | 50  | H | -8.849574  | 10.273716 | -11.663506 | -4.235192 |
| 2FHA | A | PHE | 51  | H | -10.153781 | 11.821915 | -12.825581 | -4.469944 |
| 2FHA | A | ALA | 52  | H | -10.201057 | 11.631341 | -12.760242 | -4.448635 |
| 2FHA | A | LYS | 53  | H | -10.208528 | 11.580128 | -12.741698 | -4.443984 |
| 2FHA | A | TYR | 54  | H | -13.575078 | 17.196824 | -16.334894 | -5.393242 |
| 2FHA | A | PHE | 55  | H | -13.813491 | 17.282520 | -16.890324 | -5.543059 |
| 2FHA | A | LEU | 56  | H | -11.527703 | 9.284378  | -16.747176 | -5.269606 |
| 2FHA | A | HIS | 57  | H | -11.283908 | 8.964988  | -17.181281 | -5.368389 |
| 2FHA | A | GLN | 58  | H | -11.285317 | 8.933875  | -17.192703 | -5.370040 |
| 2FHA | A | SER | 59  | H | -11.284364 | 8.930868  | -17.201359 | -5.370860 |
| 2FHA | A | HIS | 60  | H | -11.241530 | 8.965159  | -17.292691 | -5.383946 |
| 2FHA | A | GLU | 61  | H | -11.779940 | 8.718552  | -18.191547 | -5.579840 |
| 2FHA | A | GLU | 62  | H | -12.678689 | 9.934745  | -18.817051 | -5.650803 |
| 2FHA | A | ARG | 63  | H | -11.958089 | 10.038619 | -17.328043 | -5.185601 |
| 2FHA | A | GLU | 64  | H | -11.911245 | 10.066855 | -17.448344 | -5.226216 |
| 2FHA | A | HIS | 65  | H | -12.051078 | 10.257069 | -17.168561 | -5.138358 |
| 2FHA | A | ALA | 66  | H | -11.689915 | 11.958123 | -16.142259 | -5.220973 |
| 2FHA | A | GLU | 67  | H | -11.142809 | 12.392473 | -15.551711 | -5.436479 |
| 2FHA | A | LYS | 68  | H | -11.120258 | 13.646939 | -14.992675 | -5.524022 |
| 2FHA | A | LEU | 69  | H | -11.101310 | 13.862964 | -14.925086 | -5.536364 |
| 2FHA | A | MET | 70  | H | -11.081034 | 13.825729 | -15.011567 | -5.550812 |
| 2FHA | A | LYS | 71  | H | -10.858891 | 12.150911 | -15.652271 | -5.597200 |
| 2FHA | A | LEU | 72  | H | -11.136069 | 11.835648 | -15.943089 | -5.608753 |
| 2FHA | A | GLN | 73  | H | -11.274634 | 10.550771 | -16.555395 | -5.646458 |
| 2FHA | A | ASN | 74  | H | -10.940850 | 9.421283  | -17.218379 | -5.814320 |
| 2FHA | A | GLN | 75  | H | -10.938378 | 9.314936  | -17.276023 | -5.811554 |
| 2FHA | A | ARG | 76  | H | -11.164005 | 9.290948  | -17.681672 | -5.907185 |
| 2FHA | A | GLY | 77  | C | -8.446165  | 8.180126  | -13.053399 | -5.043054 |
| 2FHA | A | GLY | 78  | C | -7.776784  | 8.754908  | -11.993990 | -4.765117 |
| 2FHA | A | ARG | 79  | C | -7.626957  | 8.832157  | -12.018924 | -4.741197 |
| 2FHA | A | ILE | 80  | C | -6.059797  | 8.483621  | -9.678634  | -4.788973 |
| 2FHA | A | PHE | 81  | C | -5.792271  | 8.249792  | -9.785709  | -4.725743 |
| 2FHA | A | LEU | 82  | C | -5.368160  | 7.620373  | -9.577663  | -4.593793 |
| 2FHA | A | GLN | 83  | C | -5.345843  | 7.554673  | -9.665407  | -4.600756 |
| 2FHA | A | ASP | 84  | C | -5.276085  | 7.660498  | -9.599226  | -4.542838 |
| 2FHA | A | ILE | 85  | C | -5.399146  | 7.484580  | -9.632884  | -4.434638 |
| 2FHA | A | GLN | 86  | C | -5.393940  | 7.226666  | -9.677014  | -4.366742 |
| 2FHA | A | LYS | 87  | C | -4.799424  | 5.676746  | -9.007980  | -4.172055 |
| 2FHA | A | PRO | 88  | C | -4.704619  | 5.614335  | -9.201034  | -4.228878 |
| 2FHA | A | ASP | 89  | C | -4.729166  | 5.488909  | -9.214965  | -4.238336 |
| 2FHA | A | CYS | 90  | T | -4.742887  | 5.417465  | -9.208410  | -4.242664 |
| 2FHA | A | ASP | 91  | T | -4.782552  | 5.342646  | -9.140528  | -4.241519 |
| 2FHA | A | ASP | 92  | T | -5.759775  | 5.460368  | -10.530215 | -4.593057 |
| 2FHA | A | TRP | 93  | T | -7.919536  | 8.338137  | -13.126479 | -5.341570 |
| 2FHA | A | GLU | 94  | T | -8.688987  | 9.556940  | -13.841719 | -5.546081 |
| 2FHA | A | SER | 95  | T | -9.519332  | 10.058978 | -14.722450 | -5.492340 |
| 2FHA | A | GLY | 96  | H | -9.548612  | 10.026612 | -14.643163 | -5.460537 |
| 2FHA | A | LEU | 97  | H | -9.723607  | 9.460238  | -14.611024 | -5.316393 |
| 2FHA | A | ASN | 98  | H | -9.731385  | 9.315255  | -14.656619 | -5.310858 |
| 2FHA | A | ALA | 99  | H | -11.200678 | 12.407004 | -15.893519 | -5.414472 |
| 2FHA | A | MET | 100 | H | -11.353079 | 12.974352 | -15.840593 | -5.492544 |
| 2FHA | A | GLU | 101 | H | -10.833983 | 11.054043 | -15.195612 | -4.997973 |
| 2FHA | A | CYS | 102 | H | -10.391096 | 12.094499 | -13.815068 | -4.680618 |
| 2FHA | A | ALA | 103 | H | -10.425501 | 12.109358 | -13.652035 | -4.614998 |
| 2FHA | A | LEU | 104 | H | -10.450518 | 12.063008 | -13.594876 | -4.585747 |
| 2FHA | A | HIS | 105 | H | -10.266774 | 11.706471 | -13.962600 | -4.734518 |
| 2FHA | A | LEU | 106 | H | -10.439499 | 12.263412 | -13.669975 | -4.722476 |
| 2FHA | A | GLU | 107 | H | -10.932667 | 11.242250 | -15.177258 | -5.171267 |
| 2FHA | A | LYS | 108 | H | -10.356537 | 10.554339 | -15.125996 | -5.236708 |
| 2FHA | A | ASN | 109 | H | -10.345509 | 10.496124 | -15.192090 | -5.244667 |
| 2FHA | A | VAL | 110 | H | -10.569761 | 10.316452 | -15.295336 | -5.287434 |
| 2FHA | A | ASN | 111 | H | -10.557570 | 10.278101 | -15.332814 | -5.280892 |
| 2FHA | A | GLN | 112 | H | -10.314519 | 10.186661 | -15.130290 | -5.081782 |
| 2FHA | A | SER | 113 | H | -10.767805 | 10.641484 | -15.091231 | -4.826469 |
| 2FHA | A | LEU | 114 | H | -10.800162 | 10.771218 | -14.924148 | -4.792371 |
| 2FHA | A | LEU | 115 | H | -10.772693 | 10.772000 | -14.989717 | -4.798001 |
| 2FHA | A | GLU | 116 | H | -10.794231 | 10.783813 | -14.930601 | -4.778023 |
| 2FHA | A | LEU | 117 | H | -11.639570 | 13.305685 | -15.388993 | -4.977213 |
| 2FHA | A | HIS | 118 | H | -11.807237 | 11.742650 | -16.472025 | -4.944722 |
| 2FHA | A | LYS | 119 | H | -9.482312  | 7.675241  | -13.875347 | -4.403590 |
| 2FHA | A | LEU | 120 | H | -9.366939  | 8.100363  | -13.972682 | -4.521203 |
| 2FHA | A | ALA | 121 | H | -8.407613  | 7.611104  | -13.544143 | -4.924050 |
| 2FHA | A | THR | 122 | H | -8.307469  | 7.509123  | -13.846931 | -5.016980 |
| 2FHA | A | ASP | 123 | H | -8.293048  | 7.483037  | -13.922990 | -5.027138 |
| 2FHA | A | LYS | 124 | H | -8.359646  | 7.463983  | -14.009058 | -5.130831 |
| 2FHA | A | ASN | 125 | C | -8.371183  | 7.390098  | -14.018056 | -5.130089 |
| 2FHA | A | ASP | 126 | C | -9.180941  | 7.177235  | -15.780024 | -5.439215 |
| 2FHA | A | PRO | 127 | H | -9.557975  | 8.176774  | -15.551234 | -5.045347 |
| 2FHA | A | HIS | 128 | H | -9.693628  | 8.647108  | -15.167885 | -4.948291 |
| 2FHA | A | LEU | 129 | H | -9.878421  | 9.139056  | -14.694123 | -4.787172 |
| 2FHA | A | CYS | 130 | H | -9.994449  | 9.284872  | -14.463419 | -4.759161 |

|      |   |     |     |   |            |           |            |           |
|------|---|-----|-----|---|------------|-----------|------------|-----------|
| 2FHA | A | ASP | 131 | H | -9.993292  | 9.981453  | -14.099674 | -4.761357 |
| 2FHA | A | PHE | 132 | H | -10.950226 | 14.637283 | -13.440496 | -5.039192 |
| 2FHA | A | ILE | 133 | H | -10.959239 | 14.710625 | -13.388972 | -5.041794 |
| 2FHA | A | GLU | 134 | H | -10.974260 | 14.614115 | -13.414691 | -5.049049 |
| 2FHA | A | THR | 135 | H | -10.970341 | 14.610656 | -13.435396 | -5.056178 |
| 2FHA | A | HIS | 136 | H | -11.859151 | 15.084437 | -15.192090 | -5.391775 |
| 2FHA | A | TYR | 137 | H | -12.324726 | 14.798484 | -16.281393 | -5.582370 |
| 2FHA | A | LEU | 138 | H | -11.935051 | 11.486484 | -17.190779 | -5.537449 |
| 2FHA | A | ASN | 139 | H | -10.693855 | 7.300134  | -17.039223 | -5.300144 |
| 2FHA | A | GLU | 140 | H | -10.599517 | 7.250862  | -17.131645 | -5.270441 |
| 2FHA | A | GLN | 141 | H | -10.562577 | 7.352098  | -17.120859 | -5.247507 |
| 2FHA | A | VAL | 142 | H | -9.894040  | 6.807964  | -15.485754 | -4.420208 |
| 2FHA | A | LYS | 143 | H | -9.833428  | 6.890036  | -15.507518 | -4.423814 |
| 2FHA | A | ALA | 144 | H | -9.957490  | 7.006221  | -15.124311 | -4.208336 |
| 2FHA | A | ILE | 145 | H | -9.970210  | 7.083974  | -15.020857 | -4.176172 |
| 2FHA | A | LYS | 146 | H | -9.882077  | 7.074933  | -15.206762 | -4.269943 |
| 2FHA | A | GLU | 147 | H | -10.520495 | 8.125363  | -16.220940 | -4.758777 |
| 2FHA | A | LEU | 148 | H | -10.783795 | 8.254295  | -16.367160 | -4.841826 |
| 2FHA | A | GLY | 149 | H | -10.172629 | 8.887376  | -15.503413 | -5.053278 |
| 2FHA | A | ASP | 150 | H | -9.925960  | 9.607891  | -15.085200 | -5.126302 |
| 2FHA | A | HIS | 151 | H | -9.949071  | 10.726529 | -14.550094 | -5.160523 |
| 2FHA | A | VAL | 152 | H | -9.843903  | 11.048025 | -14.295458 | -5.037521 |
| 2FHA | A | THR | 153 | H | -8.808505  | 9.909574  | -12.362304 | -4.434130 |
| 2FHA | A | ASN | 154 | H | -8.729974  | 10.334176 | -12.176474 | -4.439863 |
| 2FHA | A | LEU | 155 | H | -8.488184  | 10.556413 | -11.976281 | -4.486319 |
| 2FHA | A | ARG | 156 | H | -7.509305  | 9.153289  | -11.106233 | -4.478067 |
| 2FHA | A | LYS | 157 | H | -6.920013  | 9.351593  | -10.516894 | -4.528469 |
| 2FHA | A | MET | 158 | H | -6.542502  | 8.947338  | -10.318063 | -4.490274 |
| 2FHA | A | GLY | 159 | T | -5.769948  | 6.850613  | -9.804011  | -4.159193 |
| 2FHA | A | ALA | 160 | T | -5.451432  | 6.450008  | -9.769952  | -4.120579 |
| 2FHA | A | PRO | 161 | T | -4.672299  | 5.118743  | -9.109635  | -4.041660 |
| 2FHA | A | GLU | 162 | T | -4.635138  | 5.061208  | -9.188282  | -4.031508 |
| 2FHA | A | SER | 163 | T | -4.646322  | 4.994343  | -9.172149  | -4.023743 |
| 2FHA | A | GLY | 164 | H | -4.714848  | 4.862981  | -9.118261  | -4.022233 |
| 2FHA | A | LEU | 165 | H | -4.790993  | 4.718882  | -9.033499  | -4.015545 |
| 2FHA | A | ALA | 166 | H | -6.166731  | 5.189398  | -10.402093 | -4.007789 |
| 2FHA | A | GLU | 167 | H | -8.573605  | 8.906423  | -12.981193 | -4.721844 |
| 2FHA | A | TYR | 168 | H | -9.221731  | 11.322147 | -12.894392 | -5.151426 |
| 2FHA | A | LEU | 169 | H | -9.889019  | 17.570322 | -13.465371 | -7.239567 |
| 2FHA | A | PHE | 170 | H | -9.374279  | 17.413008 | -12.923249 | -7.385060 |
| 2FHA | A | ASP | 171 | H | -7.349586  | 11.634453 | -11.169187 | -6.041125 |
| 2FHA | A | LYS | 172 | H | -3.917807  | 9.619958  | -5.989236  | -4.710659 |
| 2FHA | A | HIS | 173 | H | -2.645972  | 8.018191  | -4.270356  | -3.757743 |
| 2FHA | A | THR | 174 | H | -2.645972  | 8.018191  | -4.270356  | -3.757743 |
| 2FHA | A | LEU | 175 | C | -2.645972  | 8.018191  | -4.270356  | -3.757743 |
| 2FHA | A | GLY | 176 | C | -2.645972  | 8.018191  | -4.270356  | -3.757743 |
| 2ILK | A | THR | 6   | T | -8.461245  | 4.892886  | -14.443687 | -4.826048 |
| 2ILK | A | GLN | 7   | T | -8.461245  | 4.892886  | -14.443687 | -4.826048 |
| 2ILK | A | SER | 8   | T | -8.461245  | 4.892886  | -14.443687 | -4.826048 |
| 2ILK | A | GLU | 9   | C | -8.461245  | 4.892886  | -14.443687 | -4.826048 |
| 2ILK | A | ASN | 10  | C | -4.846381  | 1.793391  | -10.283435 | -4.106619 |
| 2ILK | A | SER | 11  | C | -4.477987  | 4.335856  | -8.940748  | -4.061660 |
| 2ILK | A | CYS | 12  | T | -4.374332  | 4.912048  | -8.760191  | -4.060279 |
| 2ILK | A | THR | 13  | T | -3.697506  | 6.644382  | -6.501174  | -3.779325 |
| 2ILK | A | HIS | 14  | T | -3.689353  | 6.673025  | -6.534380  | -3.789744 |
| 2ILK | A | PHE | 15  | T | -3.779940  | 7.482061  | -5.911492  | -3.735767 |
| 2ILK | A | PRO | 16  | T | -3.868163  | 7.512293  | -5.687190  | -3.691154 |
| 2ILK | A | GLY | 17  | T | -3.910134  | 7.480754  | -5.530764  | -3.664198 |
| 2ILK | A | ASN | 18  | H | -6.067080  | 8.599614  | -9.180674  | -4.452943 |
| 2ILK | A | LEU | 19  | H | -6.895910  | 8.249754  | -10.019366 | -4.226781 |
| 2ILK | A | PRO | 20  | H | -6.973364  | 7.627297  | -10.075494 | -4.154003 |
| 2ILK | A | ASN | 21  | H | -9.851498  | 7.475407  | -15.522740 | -5.046247 |
| 2ILK | A | MET | 22  | H | -10.992200 | 9.573700  | -16.051070 | -4.859439 |
| 2ILK | A | LEU | 23  | H | -10.928306 | 9.034780  | -15.568463 | -4.349858 |
| 2ILK | A | ARG | 24  | H | -10.765186 | 8.361815  | -15.435258 | -4.107316 |
| 2ILK | A | ASP | 25  | H | -10.896302 | 8.312024  | -15.453306 | -3.955317 |
| 2ILK | A | LEU | 26  | H | -10.766893 | 9.498853  | -14.473838 | -3.807803 |
| 2ILK | A | ARG | 27  | H | -10.080185 | 9.465656  | -13.415997 | -3.814873 |
| 2ILK | A | ASP | 28  | H | -9.741824  | 9.535972  | -13.059974 | -3.868461 |
| 2ILK | A | ALA | 29  | H | -9.750556  | 9.790662  | -12.917768 | -3.869569 |
| 2ILK | A | PHE | 30  | H | -9.733215  | 9.862455  | -12.906657 | -3.873888 |
| 2ILK | A | SER | 31  | H | -9.691112  | 9.793961  | -12.989622 | -3.899729 |
| 2ILK | A | ARG | 32  | H | -9.924732  | 10.203678 | -13.022575 | -3.978102 |
| 2ILK | A | VAL | 33  | H | -10.170512 | 13.836809 | -12.695692 | -4.667685 |
| 2ILK | A | LYS | 34  | H | -9.935332  | 14.153745 | -13.126193 | -5.254505 |
| 2ILK | A | THR | 35  | H | -9.487707  | 13.352614 | -13.061148 | -5.374941 |
| 2ILK | A | PHE | 36  | H | -9.394646  | 13.349339 | -13.689819 | -5.843475 |
| 2ILK | A | PHE | 37  | H | -8.727632  | 9.958427  | -14.119145 | -5.609404 |
| 2ILK | A | GLN | 38  | H | -7.342367  | 4.782026  | -13.943497 | -5.215403 |
| 2ILK | A | MET | 39  | H | -6.152360  | 3.702156  | -11.914349 | -4.467958 |
| 2ILK | A | LYS | 40  | H | -5.560373  | 2.863075  | -11.890419 | -4.447586 |

|      |   |     |     |   |            |           |            |           |
|------|---|-----|-----|---|------------|-----------|------------|-----------|
| 2ILK | A | ASP | 41  | C | -4.063656  | 1.098091  | -9.722501  | -3.938817 |
| 2ILK | A | GLN | 42  | C | -3.854627  | 1.328990  | -9.702084  | -3.922348 |
| 2ILK | A | LEU | 43  | C | -3.729945  | 1.517201  | -9.603150  | -3.876397 |
| 2ILK | A | ASP | 44  | C | -3.597838  | 2.048974  | -9.273175  | -3.846028 |
| 2ILK | A | ASN | 45  | C | -3.579458  | 2.178026  | -9.215028  | -3.836248 |
| 2ILK | A | LEU | 46  | T | -3.872444  | 3.085020  | -9.014526  | -3.799689 |
| 2ILK | A | LEU | 47  | T | -4.088703  | 3.618716  | -8.737976  | -3.764378 |
| 2ILK | A | LEU | 48  | T | -4.344648  | 4.308502  | -8.481844  | -3.805189 |
| 2ILK | A | LYS | 49  | T | -5.150774  | 4.801165  | -9.523999  | -3.974680 |
| 2ILK | A | GLU | 50  | H | -5.964774  | 5.348247  | -10.335496 | -4.192280 |
| 2ILK | A | SER | 51  | H | -7.946966  | 7.015419  | -14.553022 | -5.469001 |
| 2ILK | A | LEU | 52  | H | -8.609137  | 8.885540  | -14.448044 | -5.342206 |
| 2ILK | A | LEU | 53  | H | -8.263185  | 9.480343  | -12.377318 | -4.603515 |
| 2ILK | A | GLU | 54  | H | -7.703859  | 9.701378  | -11.110104 | -4.512981 |
| 2ILK | A | ASP | 55  | H | -7.071313  | 10.138680 | -9.862054  | -4.453949 |
| 2ILK | A | PHE | 56  | H | -6.104201  | 9.102077  | -8.776082  | -4.282936 |
| 2ILK | A | LYS | 57  | H | -5.066536  | 5.246427  | -9.413970  | -4.259778 |
| 2ILK | A | GLY | 58  | C | -5.027246  | 5.157990  | -9.556722  | -4.265821 |
| 2ILK | A | TYR | 59  | C | -5.024518  | 5.134093  | -9.579181  | -4.266000 |
| 2ILK | A | LEU | 60  | H | -5.037082  | 5.021377  | -9.586816  | -4.262712 |
| 2ILK | A | GLY | 61  | H | -5.121678  | 4.433523  | -9.750120  | -4.265626 |
| 2ILK | A | CYS | 62  | H | -6.530110  | 4.392388  | -11.722016 | -4.369581 |
| 2ILK | A | GLN | 63  | H | -7.611813  | 6.070734  | -12.288222 | -4.482564 |
| 2ILK | A | ALA | 64  | H | -9.077003  | 7.846236  | -13.831479 | -4.668972 |
| 2ILK | A | LEU | 65  | H | -9.929692  | 10.067699 | -13.963764 | -4.781943 |
| 2ILK | A | SER | 66  | H | -10.901017 | 12.257253 | -14.442367 | -4.728654 |
| 2ILK | A | GLU | 67  | H | -10.883156 | 12.600284 | -14.272528 | -4.741997 |
| 2ILK | A | MET | 68  | H | -11.123973 | 13.771372 | -13.958525 | -4.826951 |
| 2ILK | A | ILE | 69  | H | -11.358603 | 14.216241 | -13.960706 | -4.934576 |
| 2ILK | A | GLN | 70  | H | -11.839381 | 14.345737 | -14.912944 | -5.138742 |
| 2ILK | A | PHE | 71  | H | -11.476405 | 15.105026 | -13.691561 | -4.994433 |
| 2ILK | A | TYR | 72  | H | -10.296069 | 13.657125 | -12.153485 | -4.709915 |
| 2ILK | A | LEU | 73  | H | -9.538397  | 13.423798 | -11.348654 | -4.628875 |
| 2ILK | A | GLU | 74  | H | -9.440349  | 12.976980 | -11.658416 | -4.595454 |
| 2ILK | A | GLU | 75  | H | -9.363018  | 12.536221 | -11.899532 | -4.534285 |
| 2ILK | A | VAL | 76  | H | -9.329281  | 12.291109 | -11.990275 | -4.473451 |
| 2ILK | A | MET | 77  | H | -9.443246  | 12.034037 | -11.993760 | -4.429124 |
| 2ILK | A | PRO | 78  | H | -9.883903  | 9.433810  | -13.874772 | -4.190764 |
| 2ILK | A | GLN | 79  | H | -9.982407  | 8.644837  | -14.513095 | -4.254853 |
| 2ILK | A | ALA | 80  | H | -10.076920 | 8.646521  | -15.068852 | -4.567834 |
| 2ILK | A | GLU | 81  | H | -8.880087  | 7.108890  | -14.320806 | -5.120912 |
| 2ILK | A | ASN | 82  | T | -5.647319  | 4.422637  | -10.488543 | -4.493376 |
| 2ILK | A | GLN | 83  | T | -5.398766  | 5.133340  | -9.977926  | -4.294474 |
| 2ILK | A | ASP | 84  | T | -5.346391  | 5.200118  | -10.006265 | -4.261578 |
| 2ILK | A | PRO | 85  | T | -5.319980  | 5.231140  | -10.037932 | -4.242133 |
| 2ILK | A | ASP | 86  | T | -5.319835  | 5.233362  | -10.035445 | -4.240517 |
| 2ILK | A | ILE | 87  | H | -5.823769  | 6.337752  | -9.449474  | -3.904453 |
| 2ILK | A | LYS | 88  | H | -6.541011  | 5.964672  | -10.514538 | -3.886067 |
| 2ILK | A | ALA | 89  | H | -7.137357  | 6.044770  | -10.873497 | -3.852811 |
| 2ILK | A | HIS | 90  | H | -8.785596  | 7.975630  | -12.924077 | -4.393206 |
| 2ILK | A | VAL | 91  | H | -9.880100  | 9.657397  | -13.932809 | -4.339532 |
| 2ILK | A | ASN | 92  | H | -10.109019 | 8.602103  | -14.661525 | -4.362084 |
| 2ILK | A | SER | 93  | H | -10.202908 | 8.868293  | -14.528452 | -4.325376 |
| 2ILK | A | LEU | 94  | H | -10.778758 | 10.931181 | -14.997942 | -4.738493 |
| 2ILK | A | GLY | 95  | H | -10.431817 | 10.818908 | -14.877368 | -4.964283 |
| 2ILK | A | GLU | 96  | H | -9.814173  | 11.027424 | -13.630487 | -4.969302 |
| 2ILK | A | ASN | 97  | H | -9.788045  | 11.418600 | -13.471603 | -4.982190 |
| 2ILK | A | LEU | 98  | H | -9.815979  | 11.550183 | -13.369656 | -4.992106 |
| 2ILK | A | LYS | 99  | H | -9.807845  | 11.562332 | -13.377182 | -4.990303 |
| 2ILK | A | THR | 100 | H | -9.913050  | 11.711330 | -13.112121 | -4.946902 |
| 2ILK | A | LEU | 101 | H | -10.997336 | 14.582396 | -13.357413 | -5.040385 |
| 2ILK | A | ARG | 102 | H | -11.568158 | 14.112182 | -13.953019 | -4.950665 |
| 2ILK | A | LEU | 103 | H | -11.776984 | 13.362368 | -14.230955 | -4.991644 |
| 2ILK | A | ARG | 104 | H | -14.607062 | 13.558443 | -18.841449 | -5.103522 |
| 2ILK | A | LEU | 105 | H | -12.752099 | 14.114576 | -14.962139 | -4.783413 |
| 2ILK | A | ARG | 106 | H | -12.689633 | 13.913795 | -15.233096 | -4.795494 |
| 2ILK | A | ARG | 107 | H | -11.820050 | 13.352949 | -14.359895 | -4.623386 |
| 2ILK | A | CYS | 108 | T | -11.306210 | 14.279469 | -13.491268 | -4.711441 |
| 2ILK | A | HIS | 109 | T | -11.069938 | 14.271827 | -13.273989 | -4.593560 |
| 2ILK | A | ARG | 110 | T | -10.888508 | 13.965678 | -13.370616 | -4.643357 |
| 2ILK | A | PHE | 111 | T | -10.657442 | 13.643549 | -13.699784 | -4.892772 |
| 2ILK | A | LEU | 112 | T | -10.477733 | 12.509566 | -14.492479 | -5.222800 |
| 2ILK | A | PRO | 113 | G | -10.128589 | 8.958605  | -15.890459 | -5.361125 |
| 2ILK | A | CYS | 114 | G | -10.134303 | 8.444395  | -16.267981 | -5.446280 |
| 2ILK | A | GLU | 115 | G | -10.184661 | 7.989504  | -16.517139 | -5.509273 |
| 2ILK | A | ASN | 116 | C | -10.059846 | 6.675068  | -16.974543 | -5.352771 |
| 2ILK | A | LYS | 117 | C | -7.810980  | 5.183187  | -12.665790 | -4.188258 |
| 2ILK | A | SER | 118 | C | -7.159583  | 5.375239  | -11.995609 | -4.154735 |
| 2ILK | A | LYS | 119 | H | -7.046978  | 5.264669  | -12.191303 | -4.183748 |
| 2ILK | A | ALA | 120 | H | -6.977151  | 5.195128  | -12.329146 | -4.192070 |
| 2ILK | A | VAL | 121 | H | -6.889523  | 5.099006  | -12.420831 | -4.178642 |

|      |   |     |     |   |            |           |            |           |
|------|---|-----|-----|---|------------|-----------|------------|-----------|
| 2ILK | A | GLU | 122 | H | -6.996382  | 5.087128  | -12.518805 | -4.223156 |
| 2ILK | A | GLN | 123 | H | -7.368152  | 4.762798  | -13.538104 | -4.380092 |
| 2ILK | A | VAL | 124 | H | -7.563662  | 4.859110  | -13.714869 | -4.405607 |
| 2ILK | A | LYS | 125 | H | -7.735984  | 5.191809  | -13.804178 | -4.475959 |
| 2ILK | A | ASN | 126 | H | -7.987572  | 6.487333  | -14.060279 | -4.721329 |
| 2ILK | A | ALA | 127 | H | -8.000893  | 7.459772  | -13.254615 | -4.521441 |
| 2ILK | A | PHE | 128 | H | -7.952193  | 8.317891  | -12.352957 | -4.300915 |
| 2ILK | A | ASN | 129 | H | -7.149096  | 6.584009  | -11.711684 | -4.333659 |
| 2ILK | A | LYS | 130 | H | -6.262266  | 5.914936  | -10.439209 | -4.072124 |
| 2ILK | A | LEU | 131 | H | -6.105979  | 6.021292  | -10.498432 | -4.126506 |
| 2ILK | A | GLN | 132 | H | -5.968583  | 6.076212  | -10.488554 | -4.116704 |
| 2ILK | A | GLU | 133 | H | -5.793113  | 6.328016  | -10.228865 | -4.090390 |
| 2ILK | A | LYS | 134 | H | -5.824625  | 6.408521  | -10.150535 | -4.078244 |
| 2ILK | A | GLY | 135 | H | -6.066777  | 6.908073  | -10.215570 | -4.132174 |
| 2ILK | A | ILE | 136 | H | -6.181565  | 7.116753  | -10.072935 | -4.067418 |
| 2ILK | A | TYR | 137 | H | -6.391761  | 7.448040  | -9.915690  | -4.061921 |
| 2ILK | A | LYS | 138 | H | -7.037183  | 7.956451  | -11.094058 | -4.140151 |
| 2ILK | A | ALA | 139 | H | -7.154788  | 7.846257  | -11.102342 | -4.075975 |
| 2ILK | A | MET | 140 | H | -7.406872  | 7.439166  | -11.347405 | -3.983237 |
| 2ILK | A | SER | 141 | H | -7.837680  | 6.904648  | -12.276063 | -4.145346 |
| 2ILK | A | GLU | 142 | H | -7.895870  | 7.215101  | -12.560425 | -4.500042 |
| 2ILK | A | PHE | 143 | H | -8.382022  | 11.986457 | -15.847756 | -7.997377 |
| 2ILK | A | ASP | 144 | H | -7.738928  | 12.659161 | -15.656312 | -8.995916 |
| 2ILK | A | ILE | 145 | H | -7.265625  | 13.422665 | -15.280224 | -9.457407 |
| 2ILK | A | PHE | 146 | H | -6.955992  | 13.554659 | -15.090996 | -9.581696 |
| 2ILK | A | ILE | 147 | H | -6.263073  | 12.835738 | -14.159902 | -9.555304 |
| 2ILK | A | ASN | 148 | H | -5.984003  | 12.555049 | -13.956576 | -9.444104 |
| 2ILK | A | TYR | 149 | H | -5.528238  | 12.063580 | -12.787559 | -8.862651 |
| 2ILK | A | ILE | 150 | H | -4.774747  | 9.853805  | -11.310901 | -7.787380 |
| 2ILK | A | GLU | 151 | H | -4.133510  | 8.315747  | -10.529793 | -7.183960 |
| 2ILK | A | ALA | 152 | H | -3.666427  | 7.474314  | -9.667257  | -6.535947 |
| 2ILK | A | TYR | 153 | H | -3.195835  | 6.973112  | -8.605270  | -5.923288 |
| 2ILK | A | MET | 154 | H | -2.507785  | 6.066955  | -6.985193  | -5.072464 |
| 2ILK | A | THR | 155 | H | -1.833879  | 5.333563  | -5.635500  | -4.349422 |
| 2ILK | A | MET | 156 | H | -1.532325  | 5.103421  | -5.246780  | -4.006343 |
| 2ILK | A | LYS | 157 | H | -1.235403  | 4.811047  | -4.792534  | -3.610922 |
| 2ILK | A | ILE | 158 | H | -1.235403  | 4.811047  | -4.792534  | -3.610922 |
| 2ILK | A | ARG | 159 | C | -1.235403  | 4.811047  | -4.792534  | -3.610922 |
| 2ILK | A | ASN | 160 | C | -1.235403  | 4.811047  | -4.792534  | -3.610922 |
| 2PSR | A | SER | 1   | C | -6.296357  | 3.270417  | -13.721813 | -4.778403 |
| 2PSR | A | ASN | 2   | C | -6.296357  | 3.270417  | -13.721813 | -4.778403 |
| 2PSR | A | THR | 3   | C | -6.296357  | 3.270417  | -13.721813 | -4.778403 |
| 2PSR | A | GLN | 4   | H | -6.296357  | 3.270417  | -13.721813 | -4.778403 |
| 2PSR | A | ALA | 5   | H | -6.585249  | 3.562458  | -14.546093 | -5.309681 |
| 2PSR | A | GLU | 6   | H | -6.847590  | 3.855939  | -15.071268 | -5.697979 |
| 2PSR | A | ARG | 7   | H | -7.345248  | 4.411140  | -15.974336 | -6.062481 |
| 2PSR | A | SER | 8   | H | -7.837649  | 5.022042  | -17.247967 | -6.554168 |
| 2PSR | A | ILE | 9   | H | -7.843609  | 5.502266  | -16.281237 | -5.992184 |
| 2PSR | A | ILE | 10  | H | -7.963559  | 5.859174  | -15.770763 | -5.654280 |
| 2PSR | A | GLY | 11  | H | -8.118970  | 6.250916  | -15.092668 | -5.206151 |
| 2PSR | A | MET | 12  | H | -8.345517  | 6.820313  | -13.485122 | -4.185866 |
| 2PSR | A | ILE | 13  | H | -8.459936  | 7.127528  | -13.038613 | -4.064041 |
| 2PSR | A | ASP | 14  | H | -9.123242  | 7.951009  | -13.921185 | -4.519527 |
| 2PSR | A | MET | 15  | H | -10.065622 | 10.504219 | -14.548708 | -5.102026 |
| 2PSR | A | PHE | 16  | H | -10.901025 | 14.458527 | -14.058226 | -5.302300 |
| 2PSR | A | HIS | 17  | H | -10.591264 | 13.280123 | -14.426817 | -5.292152 |
| 2PSR | A | LYS | 18  | H | -8.826229  | 9.813060  | -11.955115 | -4.353303 |
| 2PSR | A | TYR | 19  | C | -8.609955  | 9.704170  | -12.171695 | -4.384914 |
| 2PSR | A | THR | 20  | C | -6.555953  | 4.965454  | -11.152268 | -4.035388 |
| 2PSR | A | ARG | 21  | B | -6.350603  | 5.193494  | -11.326919 | -4.139459 |
| 2PSR | A | ARG | 22  | T | -6.309993  | 5.441247  | -11.324415 | -4.164291 |
| 2PSR | A | ASP | 23  | T | -6.318189  | 5.382064  | -11.317388 | -4.162294 |
| 2PSR | A | ASP | 24  | T | -6.322082  | 5.354487  | -11.308229 | -4.160183 |
| 2PSR | A | LYS | 25  | B | -6.948631  | 6.376105  | -11.664569 | -4.416462 |
| 2PSR | A | ILE | 26  | B | -7.903339  | 8.991693  | -11.365003 | -4.529182 |
| 2PSR | A | ASP | 27  | C | -9.862606  | 11.565732 | -13.975174 | -5.123847 |
| 2PSR | A | LYS | 28  | H | -9.708274  | 11.847863 | -13.682807 | -5.018894 |
| 2PSR | A | PRO | 29  | H | -9.029960  | 12.598142 | -11.800442 | -4.679664 |
| 2PSR | A | SER | 30  | H | -9.036662  | 12.608196 | -11.756790 | -4.667955 |
| 2PSR | A | LEU | 31  | H | -9.106981  | 12.858917 | -11.478524 | -4.633299 |
| 2PSR | A | LEU | 32  | H | -9.169814  | 13.054166 | -11.224058 | -4.580751 |
| 2PSR | A | THR | 33  | H | -9.171051  | 13.129409 | -11.296389 | -4.668669 |
| 2PSR | A | MET | 34  | H | -10.310165 | 14.232158 | -13.869772 | -5.663876 |
| 2PSR | A | MET | 35  | H | -10.276118 | 14.241102 | -13.950227 | -5.706724 |
| 2PSR | A | LYS | 36  | H | -9.584897  | 11.886011 | -13.671244 | -5.343875 |
| 2PSR | A | GLU | 37  | H | -9.173077  | 10.715101 | -13.749674 | -5.260214 |
| 2PSR | A | ASN | 38  | H | -9.223648  | 10.483998 | -13.752899 | -5.217323 |
| 2PSR | A | PHE | 39  | H | -9.226575  | 10.499849 | -13.712016 | -5.199792 |
| 2PSR | A | PRO | 40  | H | -9.225648  | 10.470213 | -13.699125 | -5.175572 |
| 2PSR | A | ASN | 41  | H | -9.505831  | 10.214086 | -13.802223 | -5.166806 |
| 2PSR | A | PHE | 42  | H | -11.024525 | 14.455695 | -13.871377 | -4.871314 |

|      |   |     |    |   |            |           |            |           |
|------|---|-----|----|---|------------|-----------|------------|-----------|
| 2PSR | A | LEU | 43 | H | -11.199348 | 13.818536 | -14.322239 | -4.765394 |
| 2PSR | A | SER | 44 | H | -9.970284  | 6.515126  | -15.627665 | -4.577275 |
| 2PSR | A | ALA | 45 | H | -9.895550  | 6.244792  | -15.959584 | -4.675302 |
| 2PSR | A | CYS | 46 | H | -8.698015  | 4.643603  | -15.956915 | -5.313046 |
| 2PSR | A | ASP | 47 | H | -7.088168  | 4.841797  | -13.431646 | -5.154915 |
| 2PSR | A | LYS | 48 | H | -6.788458  | 5.123332  | -13.378471 | -5.194683 |
| 2PSR | A | LYS | 49 | H | -6.789506  | 5.131940  | -13.373482 | -5.198408 |
| 2PSR | A | GLY | 50 | C | -6.788463  | 5.150740  | -13.370324 | -5.198907 |
| 2PSR | A | THR | 51 | C | -6.808410  | 5.189728  | -13.277588 | -5.191185 |
| 2PSR | A | ASN | 52 | T | -7.324521  | 5.670649  | -13.313879 | -5.257325 |
| 2PSR | A | TYR | 53 | T | -9.674722  | 11.963260 | -14.129756 | -5.371824 |
| 2PSR | A | LEU | 54 | T | -9.893031  | 12.962430 | -13.562058 | -5.249851 |
| 2PSR | A | ALA | 55 | T | -10.276287 | 13.078433 | -13.780472 | -5.127164 |
| 2PSR | A | ASP | 56 | H | -10.203805 | 12.362646 | -13.926767 | -5.057271 |
| 2PSR | A | VAL | 57 | H | -10.386283 | 12.421057 | -13.830380 | -5.000679 |
| 2PSR | A | PHE | 58 | H | -10.413964 | 12.324098 | -13.808906 | -5.002670 |
| 2PSR | A | GLU | 59 | H | -10.241900 | 10.910035 | -14.835485 | -5.196650 |
| 2PSR | A | LYS | 60 | H | -10.077072 | 9.888217  | -15.573060 | -5.381542 |
| 2PSR | A | LYS | 61 | H | -9.252386  | 6.886526  | -15.949006 | -5.651227 |
| 2PSR | A | ASP | 62 | T | -7.609189  | 3.264546  | -14.930858 | -5.159810 |
| 2PSR | A | LYS | 63 | T | -5.223640  | 2.260603  | -11.658762 | -4.693650 |
| 2PSR | A | ASN | 64 | T | -5.217833  | 2.286545  | -11.687740 | -4.700798 |
| 2PSR | A | GLU | 65 | T | -5.215924  | 2.307692  | -11.691709 | -4.702083 |
| 2PSR | A | ASP | 66 | C | -5.216480  | 2.303600  | -11.687940 | -4.701207 |
| 2PSR | A | LYS | 67 | C | -5.226355  | 2.291475  | -11.634513 | -4.694024 |
| 2PSR | A | LYS | 68 | C | -7.784604  | 5.927373  | -14.240860 | -5.349023 |
| 2PSR | A | ILE | 69 | B | -8.596402  | 8.855875  | -13.058903 | -5.120080 |
| 2PSR | A | ASP | 70 | C | -11.291544 | 11.900574 | -16.268724 | -5.546172 |
| 2PSR | A | PHE | 71 | H | -11.770774 | 14.813960 | -15.261169 | -5.317085 |
| 2PSR | A | SER | 72 | H | -11.908805 | 14.435934 | -15.429476 | -5.201627 |
| 2PSR | A | GLU | 73 | H | -11.979062 | 14.350645 | -15.382520 | -5.156223 |
| 2PSR | A | PHE | 74 | H | -12.051896 | 16.431727 | -13.998767 | -4.813014 |
| 2PSR | A | LEU | 75 | H | -10.483305 | 11.985848 | -13.178033 | -4.463417 |
| 2PSR | A | SER | 76 | H | -10.446190 | 11.843790 | -13.377752 | -4.494431 |
| 2PSR | A | LEU | 77 | H | -10.363784 | 11.953162 | -13.472594 | -4.520038 |
| 2PSR | A | LEU | 78 | H | -9.763289  | 10.348112 | -13.546896 | -4.429976 |
| 2PSR | A | GLY | 79 | H | -8.397766  | 7.656042  | -12.710878 | -4.356823 |
| 2PSR | A | ASP | 80 | H | -8.407325  | 7.564745  | -12.728128 | -4.357452 |
| 2PSR | A | ILE | 81 | H | -8.407096  | 7.568203  | -12.727103 | -4.357003 |
| 2PSR | A | ALA | 82 | H | -8.407441  | 7.545747  | -12.738893 | -4.358189 |
| 2PSR | A | THR | 83 | H | -8.446275  | 7.416698  | -12.688353 | -4.358673 |
| 2PSR | A | ASP | 84 | H | -10.714262 | 9.505016  | -15.852918 | -4.799504 |
| 2PSR | A | TYR | 85 | H | -11.169898 | 9.517296  | -16.950393 | -5.090485 |
| 2PSR | A | HIS | 86 | H | -9.478641  | 5.886162  | -15.487636 | -4.810620 |
| 2PSR | A | LYS | 87 | H | -8.788354  | 5.797897  | -15.245865 | -5.029124 |
| 2PSR | A | GLN | 88 | H | -7.137033  | 4.894268  | -12.727563 | -4.581990 |
| 2PSR | A | SER | 89 | H | -7.135664  | 4.901232  | -12.742276 | -4.588345 |
| 2PSR | A | HIS | 90 | H | -7.122806  | 4.965519  | -12.820830 | -4.631060 |
| 2PSR | A | GLY | 91 | C | -7.097811  | 5.088691  | -12.897255 | -4.694177 |
| 2PSR | A | ALA | 92 | C | -7.095682  | 5.161927  | -12.847289 | -4.681744 |
| 2PSR | A | ALA | 93 | C | -7.738721  | 6.743655  | -13.188492 | -4.622711 |
| 2PSR | A | PRO | 94 | C | -7.738721  | 6.743655  | -13.188492 | -4.622711 |
| 2PSR | A | CYS | 95 | C | -7.738721  | 6.743655  | -13.188492 | -4.622711 |
| 2PSR | A | SER | 96 | C | -7.738721  | 6.743655  | -13.188492 | -4.622711 |
| 2TGI | A | ALA | 1  | C | -7.686040  | 5.715165  | -9.739842  | -2.422415 |
| 2TGI | A | LEU | 2  | C | -7.686040  | 5.715165  | -9.739842  | -2.422415 |
| 2TGI | A | ASP | 3  | B | -7.686040  | 5.715165  | -9.739842  | -2.422415 |
| 2TGI | A | ALA | 4  | H | -7.686040  | 5.715165  | -9.739842  | -2.422415 |
| 2TGI | A | ALA | 5  | H | -8.926428  | 6.064881  | -12.146054 | -3.258570 |
| 2TGI | A | TYR | 6  | H | -11.249572 | 8.891581  | -16.441896 | -4.842819 |
| 2TGI | A | CYS | 7  | H | -8.764400  | 5.663967  | -13.621135 | -4.185036 |
| 2TGI | A | PHE | 8  | T | -8.743813  | 5.629612  | -13.675366 | -4.159369 |
| 2TGI | A | ARG | 9  | T | -8.241503  | 2.830014  | -14.150826 | -3.745621 |
| 2TGI | A | ASN | 10 | T | -8.083749  | 2.753485  | -14.400447 | -3.889112 |
| 2TGI | A | VAL | 11 | C | -7.806868  | 3.080168  | -14.345395 | -4.117734 |
| 2TGI | A | GLN | 12 | C | -7.935194  | 2.459762  | -14.543054 | -4.107899 |
| 2TGI | A | ASP | 13 | C | -7.935083  | 2.480580  | -14.543019 | -4.116099 |
| 2TGI | A | ASN | 14 | B | -8.181998  | 3.384570  | -14.561600 | -4.467937 |
| 2TGI | A | CYS | 15 | C | -8.374213  | 3.714921  | -14.310368 | -4.511628 |
| 2TGI | A | CYS | 16 | E | -10.506712 | 6.818507  | -16.330205 | -4.869816 |
| 2TGI | A | LEU | 17 | E | -10.703853 | 7.116596  | -15.257729 | -4.362042 |
| 2TGI | A | ARG | 18 | E | -12.338271 | 11.185754 | -15.391811 | -3.739813 |
| 2TGI | A | PRO | 19 | C | -10.622761 | 11.027685 | -11.850215 | -3.359275 |
| 2TGI | A | LEU | 20 | C | -10.625274 | 11.074025 | -11.813296 | -3.357909 |
| 2TGI | A | TYR | 21 | E | -10.630956 | 11.128578 | -11.774339 | -3.367119 |
| 2TGI | A | ILE | 22 | E | -10.355552 | 13.170633 | -12.854386 | -4.704128 |
| 2TGI | A | ASP | 23 | E | -9.842122  | 11.491638 | -12.577618 | -4.265995 |
| 2TGI | A | PHE | 24 | H | -9.789072  | 12.119874 | -12.636159 | -4.525349 |
| 2TGI | A | LYS | 25 | H | -6.395369  | 5.099056  | -9.359609  | -3.387517 |
| 2TGI | A | ARG | 26 | H | -6.353841  | 5.233999  | -9.443469  | -3.396493 |
| 2TGI | A | ASP | 27 | H | -5.991350  | 6.867895  | -9.576252  | -4.029701 |

|      |   |     |     |   |            |           |            |           |
|------|---|-----|-----|---|------------|-----------|------------|-----------|
| 2TGI | A | LEU | 28  | H | -5.628356  | 7.894033  | -8.337865  | -3.747993 |
| 2TGI | A | GLY | 29  | C | -5.364141  | 9.115631  | -7.353620  | -3.639083 |
| 2TGI | A | TRP | 30  | T | -5.449142  | 10.133305 | -6.895686  | -3.682342 |
| 2TGI | A | LYS | 31  | T | -5.451644  | 10.210021 | -6.858354  | -3.689054 |
| 2TGI | A | TRP | 32  | T | -5.572079  | 10.527178 | -6.209983  | -3.442689 |
| 2TGI | A | ILE | 33  | E | -5.882786  | 11.488340 | -5.790705  | -3.452811 |
| 2TGI | A | HIS | 34  | E | -6.738356  | 9.744197  | -8.173583  | -3.340602 |
| 2TGI | A | GLU | 35  | E | -7.059981  | 7.127849  | -9.602054  | -3.249153 |
| 2TGI | A | PRO | 36  | T | -7.162334  | 5.990495  | -9.804295  | -3.090164 |
| 2TGI | A | LYS | 37  | T | -7.164531  | 5.957739  | -9.798952  | -3.085120 |
| 2TGI | A | GLY | 38  | E | -7.247189  | 5.650187  | -9.827495  | -3.124195 |
| 2TGI | A | TYR | 39  | E | -10.695373 | 10.864816 | -13.667930 | -4.003305 |
| 2TGI | A | ASN | 40  | E | -10.550685 | 10.558259 | -13.691744 | -4.109185 |
| 2TGI | A | ALA | 41  | C | -10.330617 | 10.017023 | -13.650177 | -4.036363 |
| 2TGI | A | ASN | 42  | C | -8.955493  | 9.094896  | -13.659724 | -5.226944 |
| 2TGI | A | PHE | 43  | E | -8.195178  | 6.488241  | -12.330900 | -3.980063 |
| 2TGI | A | CYS | 44  | E | -7.894501  | 5.503560  | -12.552270 | -3.850526 |
| 2TGI | A | ALA | 45  | E | -7.684087  | 5.009555  | -12.447691 | -3.637981 |
| 2TGI | A | GLY | 46  | C | -7.588709  | 5.470040  | -12.289524 | -3.669478 |
| 2TGI | A | ALA | 47  | B | -7.587758  | 5.586903  | -12.152757 | -3.610729 |
| 2TGI | A | CYS | 48  | C | -7.764971  | 5.626108  | -12.269601 | -3.649369 |
| 2TGI | A | PRO | 49  | T | -7.984549  | 6.457705  | -11.976313 | -3.649191 |
| 2TGI | A | TYR | 50  | T | -8.391631  | 9.054748  | -11.742906 | -4.156236 |
| 2TGI | A | LEU | 51  | T | -8.920771  | 10.384355 | -12.189228 | -4.598509 |
| 2TGI | A | TRP | 52  | T | -10.115256 | 11.450609 | -12.527220 | -4.055781 |
| 2TGI | A | SER | 53  | T | -10.077101 | 9.877705  | -13.456995 | -4.159402 |
| 2TGI | A | SER | 54  | T | -9.598043  | 5.232346  | -15.251273 | -4.389132 |
| 2TGI | A | ASP | 55  | C | -9.271104  | 4.316282  | -15.314138 | -4.271538 |
| 2TGI | A | THR | 56  | C | -9.217461  | 4.435887  | -15.299396 | -4.239597 |
| 2TGI | A | GLN | 57  | H | -9.146113  | 4.686539  | -15.341891 | -4.279807 |
| 2TGI | A | HIS | 58  | H | -9.173138  | 4.694649  | -15.267969 | -4.259344 |
| 2TGI | A | SER | 59  | H | -9.457401  | 4.891896  | -15.263172 | -4.202887 |
| 2TGI | A | ARG | 60  | H | -10.082575 | 6.463955  | -15.525845 | -4.317969 |
| 2TGI | A | VAL | 61  | H | -10.333598 | 7.070962  | -15.590530 | -4.471722 |
| 2TGI | A | LEU | 62  | H | -11.498671 | 9.281189  | -14.749056 | -3.562803 |
| 2TGI | A | SER | 63  | H | -11.480354 | 10.515340 | -15.571142 | -4.561127 |
| 2TGI | A | LEU | 64  | H | -8.987989  | 7.904994  | -12.138659 | -3.781629 |
| 2TGI | A | TYR | 65  | H | -8.468425  | 7.810130  | -12.215970 | -3.950740 |
| 2TGI | A | ASN | 66  | H | -7.758565  | 5.282936  | -12.210873 | -3.624871 |
| 2TGI | A | THR | 67  | H | -5.912453  | 3.559871  | -10.650810 | -3.762860 |
| 2TGI | A | ILE | 68  | H | -5.572857  | 3.336746  | -9.917413  | -3.249133 |
| 2TGI | A | ASN | 69  | C | -5.344081  | 2.925397  | -9.736763  | -3.024822 |
| 2TGI | A | PRO | 70  | G | -5.100802  | 2.843135  | -9.206163  | -2.731383 |
| 2TGI | A | GLU | 71  | G | -5.079391  | 2.870275  | -9.225681  | -2.728847 |
| 2TGI | A | ALA | 72  | G | -5.226217  | 2.793803  | -8.830468  | -2.432367 |
| 2TGI | A | SER | 73  | C | -5.385759  | 2.743036  | -8.795456  | -2.383524 |
| 2TGI | A | ALA | 74  | C | -5.635585  | 3.099871  | -8.498969  | -2.293982 |
| 2TGI | A | SER | 75  | C | -6.676594  | 5.092050  | -10.155462 | -2.953785 |
| 2TGI | A | PRO | 76  | C | -7.161788  | 7.330281  | -10.250709 | -3.228420 |
| 2TGI | A | CYS | 77  | C | -7.526954  | 6.293932  | -10.901718 | -3.043279 |
| 2TGI | A | CYS | 78  | E | -7.766049  | 6.388862  | -11.470936 | -3.377976 |
| 2TGI | A | VAL | 79  | E | -7.650218  | 6.732734  | -11.478938 | -3.608224 |
| 2TGI | A | SER | 80  | E | -7.747476  | 7.277937  | -11.601487 | -3.870194 |
| 2TGI | A | GLN | 81  | E | -7.953115  | 8.291558  | -12.175496 | -4.467513 |
| 2TGI | A | ASP | 82  | E | -7.917605  | 9.138264  | -11.724134 | -4.466367 |
| 2TGI | A | LEU | 83  | E | -7.513050  | 10.759924 | -9.712785  | -4.029492 |
| 2TGI | A | GLU | 84  | E | -7.540211  | 11.804374 | -9.025384  | -3.900536 |
| 2TGI | A | PRO | 85  | E | -7.514002  | 12.362639 | -8.563678  | -3.769493 |
| 2TGI | A | LEU | 86  | E | -7.594736  | 12.876829 | -8.056135  | -3.650599 |
| 2TGI | A | THR | 87  | E | -7.663806  | 12.953727 | -7.673951  | -3.497608 |
| 2TGI | A | ILE | 88  | E | -8.266283  | 14.225575 | -7.625394  | -3.418168 |
| 2TGI | A | LEU | 89  | E | -7.583729  | 14.457741 | -10.148677 | -6.305826 |
| 2TGI | A | TYR | 90  | E | -6.582888  | 11.632027 | -9.110173  | -5.084924 |
| 2TGI | A | TYR | 91  | E | -2.044118  | 5.821093  | -2.703253  | -2.814638 |
| 2TGI | A | ILE | 92  | E | -0.378975  | 5.231500  | -2.521131  | -3.553391 |
| 2TGI | A | GLY | 93  | T | -0.375166  | 5.248753  | -2.554308  | -3.565315 |
| 2TGI | A | LYS | 94  | T | -0.374346  | 5.255633  | -2.560771  | -3.567400 |
| 2TGI | A | THR | 95  | E | -0.374345  | 5.255590  | -2.560794  | -3.567391 |
| 2TGI | A | PRO | 96  | E | -0.456567  | 4.705451  | -2.311424  | -3.350450 |
| 2TGI | A | LYS | 97  | E | -3.747144  | 4.780085  | -5.909469  | -2.917671 |
| 2TGI | A | ILE | 98  | E | -4.740767  | 6.844627  | -5.727729  | -2.748919 |
| 2TGI | A | GLU | 99  | E | -6.302184  | 9.614490  | -9.559737  | -4.473986 |
| 2TGI | A | GLN | 100 | E | -6.380327  | 9.062069  | -9.136357  | -3.988033 |
| 2TGI | A | LEU | 101 | E | -6.483507  | 8.697686  | -8.798316  | -3.643585 |
| 2TGI | A | SER | 102 | E | -6.511500  | 8.606332  | -8.615268  | -3.519544 |
| 2TGI | A | ASN | 103 | E | -6.549215  | 8.656959  | -8.504399  | -3.522537 |
| 2TGI | A | MET | 104 | E | -6.773155  | 9.242372  | -8.048048  | -3.488772 |
| 2TGI | A | ILE | 105 | E | -8.240703  | 11.432016 | -9.378865  | -3.640722 |
| 2TGI | A | VAL | 106 | E | -9.098194  | 13.521124 | -10.235867 | -4.324117 |
| 2TGI | A | LYS | 107 | E | -10.682523 | 13.406515 | -11.439975 | -4.036427 |
| 2TGI | A | SER | 108 | E | -12.808230 | 13.554824 | -14.123490 | -4.097372 |

|      |   |     |     |   |            |           |            |           |
|------|---|-----|-----|---|------------|-----------|------------|-----------|
| 2TGI | A | CYS | 109 | E | -12.108696 | 7.758786  | -16.060771 | -3.960776 |
| 2TGI | A | LYS | 110 | E | -12.108696 | 7.758786  | -16.060771 | -3.960776 |
| 2TGI | A | CYS | 111 | E | -12.108696 | 7.758786  | -16.060771 | -3.960776 |
| 2TGI | A | SER | 112 | C | -12.108696 | 7.758786  | -16.060771 | -3.960776 |
| 3FIB | A | GLN | 144 | C | -3.438145  | 7.631913  | -5.662079  | -3.648907 |
| 3FIB | A | ILE | 145 | E | -3.438145  | 7.631913  | -5.662079  | -3.648907 |
| 3FIB | A | HIS | 146 | E | -3.438145  | 7.631913  | -5.662079  | -3.648907 |
| 3FIB | A | ASP | 147 | E | -3.438145  | 7.631913  | -5.662079  | -3.648907 |
| 3FIB | A | ILE | 148 | E | -4.208368  | 9.526206  | -6.311706  | -4.269806 |
| 3FIB | A | THR | 149 | E | -5.169616  | 10.610151 | -7.889150  | -5.107022 |
| 3FIB | A | GLY | 150 | E | -6.478604  | 11.329415 | -10.160812 | -6.049838 |
| 3FIB | A | LYS | 151 | T | -9.859623  | 13.715309 | -15.124900 | -7.370248 |
| 3FIB | A | ASP | 152 | T | -11.612703 | 9.146674  | -17.946328 | -5.604637 |
| 3FIB | A | CYS | 153 | H | -12.035655 | 8.441313  | -18.964906 | -5.864526 |
| 3FIB | A | GLN | 154 | H | -11.663153 | 10.673669 | -16.570045 | -5.400857 |
| 3FIB | A | ASP | 155 | H | -8.992604  | 10.196493 | -12.319023 | -4.722708 |
| 3FIB | A | ILE | 156 | H | -7.529004  | 8.593956  | -11.440647 | -4.712502 |
| 3FIB | A | ALA | 157 | H | -7.151984  | 7.751935  | -11.819549 | -4.712422 |
| 3FIB | A | ASN | 158 | H | -6.451504  | 6.097463  | -11.836313 | -4.726729 |
| 3FIB | A | LYS | 159 | H | -5.862852  | 5.822317  | -11.031598 | -4.518742 |
| 3FIB | A | GLY | 160 | C | -5.824239  | 5.770957  | -11.102990 | -4.499268 |
| 3FIB | A | ALA | 161 | C | -5.850388  | 5.628018  | -11.110289 | -4.485857 |
| 3FIB | A | LYS | 162 | C | -5.880992  | 5.569024  | -11.052843 | -4.473349 |
| 3FIB | A | GLN | 163 | C | -6.063194  | 5.642206  | -10.767916 | -4.379760 |
| 3FIB | A | SER | 164 | C | -7.335159  | 5.501978  | -12.349981 | -4.254069 |
| 3FIB | A | GLY | 165 | E | -8.536369  | 6.391956  | -13.539073 | -4.315799 |
| 3FIB | A | LEU | 166 | E | -9.529468  | 8.520453  | -13.594521 | -4.491974 |
| 3FIB | A | TYR | 167 | E | -12.226388 | 15.639598 | -15.118705 | -5.314559 |
| 3FIB | A | PHE | 168 | E | -12.005297 | 17.822785 | -13.824586 | -5.427113 |
| 3FIB | A | ILE | 169 | E | -8.645340  | 12.890519 | -9.921449  | -4.332027 |
| 3FIB | A | LYS | 170 | C | -6.849534  | 11.238600 | -8.487563  | -4.240961 |
| 3FIB | A | PRO | 171 | T | -5.441958  | 9.026030  | -7.589299  | -3.968457 |
| 3FIB | A | LEU | 172 | T | -4.956943  | 7.641216  | -8.275597  | -4.121382 |
| 3FIB | A | LYS | 173 | T | -4.874050  | 7.740669  | -8.442268  | -4.208862 |
| 3FIB | A | ALA | 174 | T | -4.873994  | 7.738508  | -8.445301  | -4.210096 |
| 3FIB | A | ASN | 175 | T | -4.893393  | 7.628402  | -8.450156  | -4.210608 |
| 3FIB | A | GLN | 176 | T | -5.157289  | 6.970644  | -8.983521  | -4.361447 |
| 3FIB | A | GLN | 177 | T | -6.064555  | 8.504952  | -9.589740  | -4.795873 |
| 3FIB | A | PHE | 178 | E | -8.212751  | 12.351313 | -11.097508 | -5.027759 |
| 3FIB | A | LEU | 179 | E | -8.631252  | 13.316696 | -10.677218 | -5.052690 |
| 3FIB | A | VAL | 180 | E | -10.925625 | 16.583854 | -11.874019 | -4.967880 |
| 3FIB | A | TYR | 181 | E | -13.019448 | 19.542203 | -14.377400 | -5.323781 |
| 3FIB | A | CYS | 182 | E | -10.117118 | 7.483143  | -16.176642 | -5.498330 |
| 3FIB | A | GLU | 183 | E | -8.634521  | 6.707317  | -14.287253 | -5.043567 |
| 3FIB | A | ILE | 184 | E | -5.540613  | 4.668533  | -10.595122 | -4.591790 |
| 3FIB | A | ASP | 185 | T | -5.393704  | 4.222503  | -11.186027 | -4.707903 |
| 3FIB | A | GLY | 186 | T | -5.310832  | 4.129549  | -11.462910 | -4.781046 |
| 3FIB | A | SER | 187 | T | -5.310999  | 4.128670  | -11.461585 | -4.780848 |
| 3FIB | A | GLY | 188 | T | -5.312993  | 4.120240  | -11.452637 | -4.780102 |
| 3FIB | A | ASN | 189 | C | -5.983271  | 2.991763  | -13.292973 | -5.179768 |
| 3FIB | A | GLY | 190 | E | -6.517233  | 3.511281  | -13.305374 | -5.267338 |
| 3FIB | A | TRP | 191 | E | -11.584074 | 13.049368 | -16.539111 | -5.975670 |
| 3FIB | A | THR | 192 | E | -12.119086 | 16.092516 | -15.768021 | -6.100451 |
| 3FIB | A | VAL | 193 | E | -12.606609 | 19.190539 | -14.240383 | -5.830777 |
| 3FIB | A | PHE | 194 | E | -12.926561 | 21.116779 | -13.062385 | -5.732641 |
| 3FIB | A | GLN | 195 | E | -14.635041 | 19.773133 | -16.867508 | -6.257533 |
| 3FIB | A | LYS | 196 | E | -12.772841 | 13.037152 | -17.735760 | -6.248377 |
| 3FIB | A | ARG | 197 | E | -10.591940 | 10.495201 | -15.398094 | -5.606373 |
| 3FIB | A | LEU | 198 | C | -7.171473  | 9.115637  | -10.434276 | -4.658453 |
| 3FIB | A | ASP | 199 | C | -6.406292  | 6.877273  | -11.181192 | -4.753775 |
| 3FIB | A | GLY | 200 | C | -6.401131  | 6.910400  | -11.194186 | -4.756135 |
| 3FIB | A | SER | 201 | C | -6.400906  | 6.912480  | -11.195223 | -4.756210 |
| 3FIB | A | VAL | 202 | C | -6.401102  | 6.913640  | -11.192708 | -4.755841 |
| 3FIB | A | ASP | 203 | C | -6.588750  | 6.095888  | -11.482015 | -4.793505 |
| 3FIB | A | PHE | 204 | C | -9.145492  | 11.055282 | -12.797292 | -5.062845 |
| 3FIB | A | LYS | 205 | C | -10.449423 | 13.990945 | -13.807111 | -5.377534 |
| 3FIB | A | LYS | 206 | C | -10.650657 | 14.714498 | -13.909823 | -5.630058 |
| 3FIB | A | ASN | 207 | C | -11.227006 | 14.162979 | -15.555292 | -6.052323 |
| 3FIB | A | TRP | 208 | H | -11.718923 | 13.812628 | -16.130698 | -5.985655 |
| 3FIB | A | ILE | 209 | H | -11.359244 | 13.296692 | -16.042881 | -5.880686 |
| 3FIB | A | GLN | 210 | H | -11.305510 | 13.354377 | -16.073376 | -5.922923 |
| 3FIB | A | TYR | 211 | H | -11.524333 | 13.705988 | -16.050447 | -5.916045 |
| 3FIB | A | LYS | 212 | H | -8.237308  | 12.446487 | -11.317887 | -5.644916 |
| 3FIB | A | GLU | 213 | H | -6.645533  | 10.318956 | -9.728044  | -4.992680 |
| 3FIB | A | GLY | 214 | C | -6.110646  | 11.737656 | -8.462371  | -4.815616 |
| 3FIB | A | PHE | 215 | E | -6.088476  | 11.836023 | -8.489056  | -4.821099 |
| 3FIB | A | GLY | 216 | E | -5.966533  | 11.639608 | -8.573918  | -4.742669 |
| 3FIB | A | HIS | 217 | C | -5.944797  | 11.542361 | -8.589905  | -4.693496 |
| 3FIB | A | LEU | 218 | C | -6.030899  | 11.811551 | -8.385719  | -4.573508 |
| 3FIB | A | SER | 219 | T | -5.208889  | 6.848611  | -8.932595  | -4.238303 |
| 3FIB | A | PRO | 220 | T | -4.536717  | 6.981814  | -8.437682  | -4.427164 |



|      |   |     |     |   |            |           |            |           |
|------|---|-----|-----|---|------------|-----------|------------|-----------|
| 3FIB | A | THR | 221 | T | -4.541552  | 6.923323  | -8.464449  | -4.436737 |
| 3FIB | A | GLY | 222 | T | -4.544711  | 6.905675  | -8.457023  | -4.437954 |
| 3FIB | A | THR | 223 | C | -4.553163  | 6.854350  | -8.443979  | -4.437273 |
| 3FIB | A | THR | 224 | C | -4.757052  | 7.078641  | -8.258175  | -4.529257 |
| 3FIB | A | GLU | 225 | C | -7.358754  | 7.611036  | -12.546498 | -5.488543 |
| 3FIB | A | PHE | 226 | E | -11.551588 | 13.075404 | -15.543592 | -5.814033 |
| 3FIB | A | TRP | 227 | E | -13.914325 | 17.835951 | -16.843785 | -5.927297 |
| 3FIB | A | LEU | 228 | C | -12.866560 | 14.101779 | -17.043727 | -5.839352 |
| 3FIB | A | GLY | 229 | C | -12.145606 | 13.590027 | -16.501795 | -5.789936 |
| 3FIB | A | ASN | 230 | H | -12.131207 | 13.621389 | -16.535344 | -5.793273 |
| 3FIB | A | GLU | 231 | H | -11.983479 | 14.008777 | -16.255229 | -5.690141 |
| 3FIB | A | LYS | 232 | H | -11.930730 | 14.419587 | -15.974549 | -5.614615 |
| 3FIB | A | ILE | 233 | H | -11.987574 | 14.867752 | -15.618450 | -5.508056 |
| 3FIB | A | HIS | 234 | H | -12.156935 | 16.073141 | -14.855227 | -5.148168 |
| 3FIB | A | LEU | 235 | H | -12.142990 | 16.086793 | -14.872774 | -5.155924 |
| 3FIB | A | ILE | 236 | H | -12.248822 | 15.978037 | -15.090920 | -5.182604 |
| 3FIB | A | SER | 237 | H | -10.974127 | 9.753464  | -16.314274 | -5.448368 |
| 3FIB | A | THR | 238 | H | -8.263192  | 9.368575  | -12.043243 | -4.894028 |
| 3FIB | A | GLN | 239 | G | -7.861625  | 8.808269  | -12.018584 | -4.659138 |
| 3FIB | A | SER | 240 | G | -7.745105  | 9.183613  | -11.775369 | -4.540107 |
| 3FIB | A | ALA | 241 | G | -7.736076  | 9.239749  | -11.768698 | -4.530337 |
| 3FIB | A | ILE | 242 | C | -7.738185  | 9.242396  | -11.750997 | -4.526622 |
| 3FIB | A | PRO | 243 | C | -8.048863  | 9.157374  | -11.579908 | -4.277303 |
| 3FIB | A | TYR | 244 | E | -8.715810  | 11.080060 | -10.716201 | -3.985989 |
| 3FIB | A | ALA | 245 | E | -10.199964 | 13.023807 | -11.411171 | -3.919766 |
| 3FIB | A | LEU | 246 | E | -12.252699 | 17.493836 | -13.288963 | -4.604232 |
| 3FIB | A | ARG | 247 | E | -12.695654 | 17.285131 | -14.795289 | -5.208917 |
| 3FIB | A | VAL | 248 | E | -12.585896 | 16.809377 | -15.237210 | -5.369584 |
| 3FIB | A | GLU | 249 | E | -12.597266 | 16.745879 | -15.262801 | -5.387982 |
| 3FIB | A | LEU | 250 | E | -12.942225 | 16.724109 | -16.178661 | -5.738719 |
| 3FIB | A | GLU | 251 | E | -11.422917 | 10.940650 | -17.437031 | -6.470280 |
| 3FIB | A | ASP | 252 | T | -9.836448  | 8.539463  | -15.461913 | -5.525440 |
| 3FIB | A | TRP | 253 | T | -7.295388  | 9.457521  | -11.206761 | -5.239659 |
| 3FIB | A | ASN | 254 | T | -6.716674  | 7.581947  | -11.796041 | -5.148310 |
| 3FIB | A | GLY | 255 | T | -6.690338  | 7.605295  | -11.867113 | -5.151477 |
| 3FIB | A | ARG | 256 | C | -6.689540  | 7.608194  | -11.869505 | -5.150402 |
| 3FIB | A | THR | 257 | E | -6.691973  | 7.606627  | -11.855191 | -5.149026 |
| 3FIB | A | SER | 258 | E | -6.952895  | 6.575315  | -12.246549 | -5.101024 |
| 3FIB | A | THR | 259 | E | -8.519077  | 8.224077  | -13.483962 | -5.204480 |
| 3FIB | A | ALA | 260 | E | -10.320528 | 10.318288 | -14.545291 | -4.873478 |
| 3FIB | A | ASP | 261 | E | -11.182949 | 11.567584 | -15.096937 | -5.220322 |
| 3FIB | A | TYR | 262 | E | -13.532474 | 16.759236 | -15.950229 | -5.008839 |
| 3FIB | A | ALA | 263 | E | -12.039493 | 16.560020 | -12.963154 | -4.628274 |
| 3FIB | A | MET | 264 | E | -11.134099 | 15.500033 | -12.905396 | -4.922155 |
| 3FIB | A | PHE | 265 | E | -10.379686 | 14.893727 | -12.229168 | -4.788445 |
| 3FIB | A | LYS | 266 | E | -9.993600  | 12.450023 | -13.298756 | -4.804774 |
| 3FIB | A | VAL | 267 | E | -7.805978  | 8.199068  | -11.338540 | -4.285790 |
| 3FIB | A | GLY | 268 | C | -7.160917  | 6.024137  | -12.507824 | -4.622164 |
| 3FIB | A | PRO | 269 | C | -7.137738  | 6.022750  | -12.607272 | -4.643843 |
| 3FIB | A | GLU | 270 | G | -7.139469  | 5.997086  | -12.609818 | -4.643718 |
| 3FIB | A | ALA | 271 | G | -7.141764  | 5.982386  | -12.602659 | -4.643031 |
| 3FIB | A | ASP | 272 | G | -7.368364  | 5.000208  | -13.214861 | -4.815620 |
| 3FIB | A | LYS | 273 | T | -9.053540  | 6.222417  | -15.057278 | -5.185317 |
| 3FIB | A | TYR | 274 | T | -12.484934 | 11.248112 | -18.059066 | -6.014597 |
| 3FIB | A | ARG | 275 | T | -14.013058 | 13.351732 | -18.799391 | -5.747717 |
| 3FIB | A | LEU | 276 | E | -13.192422 | 16.507418 | -15.038234 | -5.130918 |
| 3FIB | A | THR | 277 | E | -12.376921 | 17.452523 | -13.901077 | -5.208001 |
| 3FIB | A | TYR | 278 | E | -11.397123 | 17.876986 | -11.915636 | -4.818997 |
| 3FIB | A | ALA | 279 | E | -8.285877  | 11.762395 | -9.949244  | -4.248505 |
| 3FIB | A | TYR | 280 | E | -7.339583  | 11.218321 | -9.708107  | -4.504642 |
| 3FIB | A | PHE | 281 | E | -6.252242  | 8.494521  | -9.873106  | -4.599305 |
| 3FIB | A | ALA | 282 | E | -5.550932  | 6.876433  | -9.832632  | -4.456525 |
| 3FIB | A | GLY | 283 | E | -5.275770  | 6.054661  | -10.337703 | -4.563972 |
| 3FIB | A | GLY | 284 | T | -5.265949  | 6.044818  | -10.385158 | -4.575842 |
| 3FIB | A | ASP | 285 | T | -5.279901  | 5.923241  | -10.405855 | -4.576100 |
| 3FIB | A | ALA | 286 | T | -5.385210  | 5.523748  | -10.503063 | -4.567905 |
| 3FIB | A | GLY | 287 | T | -5.825569  | 4.821533  | -11.262424 | -4.760165 |
| 3FIB | A | ASP | 288 | C | -7.477579  | 7.390537  | -12.372730 | -5.000805 |
| 3FIB | A | ALA | 289 | G | -9.149447  | 11.298995 | -12.975787 | -4.950908 |
| 3FIB | A | PHE | 290 | G | -9.593638  | 14.321597 | -12.410461 | -5.274117 |
| 3FIB | A | ASP | 291 | G | -9.381277  | 14.377607 | -12.425680 | -5.414867 |
| 3FIB | A | GLY | 292 | C | -7.859051  | 12.427632 | -10.741706 | -5.393241 |
| 3FIB | A | PHE | 293 | C | -7.740892  | 12.097788 | -11.040809 | -5.409221 |
| 3FIB | A | ASP | 294 | C | -7.360295  | 10.757059 | -11.626818 | -5.471056 |
| 3FIB | A | PHE | 295 | C | -6.828537  | 8.623900  | -11.814387 | -5.243964 |
| 3FIB | A | GLY | 296 | T | -4.786516  | 3.070423  | -10.417121 | -4.473990 |
| 3FIB | A | ASP | 297 | T | -4.777113  | 3.066694  | -10.453019 | -4.470231 |
| 3FIB | A | ASP | 298 | T | -4.777242  | 3.060007  | -10.453898 | -4.468882 |
| 3FIB | A | PRO | 299 | T | -4.780292  | 3.025920  | -10.445481 | -4.462282 |
| 3FIB | A | SER | 300 | H | -4.791482  | 2.946892  | -10.416812 | -4.450292 |
| 3FIB | A | ASP | 301 | H | -7.012003  | 5.331891  | -12.298459 | -4.512408 |

|      |   |     |     |   |            |           |            |           |
|------|---|-----|-----|---|------------|-----------|------------|-----------|
| 3FIB | A | LYS | 302 | H | -8.422750  | 7.044402  | -13.429816 | -4.463488 |
| 3FIB | A | PHE | 303 | H | -8.904052  | 7.204485  | -13.417510 | -4.419226 |
| 3FIB | A | PHE | 304 | H | -11.507079 | 10.755319 | -16.601971 | -5.242246 |
| 3FIB | A | THR | 305 | H | -11.925320 | 11.308902 | -17.618799 | -5.651955 |
| 3FIB | A | SER | 306 | C | -12.074687 | 10.230994 | -18.117113 | -5.537663 |
| 3FIB | A | HIS | 307 | T | -12.190981 | 9.731818  | -18.545834 | -5.671932 |
| 3FIB | A | ASN | 308 | T | -12.183938 | 9.757808  | -18.582414 | -5.697519 |
| 3FIB | A | GLY | 309 | T | -12.183081 | 9.762201  | -18.587936 | -5.700358 |
| 3FIB | A | MET | 310 | B | -12.716928 | 9.493479  | -19.468959 | -5.894736 |
| 3FIB | A | GLN | 311 | C | -13.665495 | 11.858440 | -20.450182 | -6.534021 |
| 3FIB | A | PHE | 312 | C | -13.702163 | 14.633419 | -18.388719 | -6.018312 |
| 3FIB | A | SER | 313 | B | -11.969791 | 11.826611 | -16.920115 | -5.926879 |
| 3FIB | A | THR | 314 | B | -10.923930 | 10.275679 | -16.669828 | -5.952187 |
| 3FIB | A | TRP | 315 | T | -10.906931 | 10.214641 | -16.784926 | -5.965960 |
| 3FIB | A | ASP | 316 | T | -10.897570 | 10.148826 | -16.874080 | -5.975511 |
| 3FIB | A | ASN | 317 | B | -10.895195 | 10.083672 | -16.927479 | -5.982467 |
| 3FIB | A | ASP | 318 | T | -10.988699 | 9.776038  | -16.985660 | -5.998050 |
| 3FIB | A | ASN | 319 | C | -12.372453 | 7.724834  | -21.313844 | -6.442532 |
| 3FIB | A | ASP | 320 | C | -9.249305  | 6.646104  | -15.689837 | -5.652998 |
| 3FIB | A | LYS | 321 | C | -8.566197  | 6.965522  | -15.259104 | -5.775407 |
| 3FIB | A | PHE | 322 | T | -8.153536  | 6.648322  | -15.190633 | -5.782574 |
| 3FIB | A | GLU | 323 | T | -7.968539  | 6.415318  | -15.142719 | -5.648955 |
| 3FIB | A | GLY | 324 | T | -7.958896  | 6.425313  | -15.164316 | -5.643575 |
| 3FIB | A | ASN | 325 | T | -8.029072  | 6.401652  | -15.103789 | -5.642987 |
| 3FIB | A | CYS | 326 | H | -8.220757  | 6.130614  | -15.119786 | -5.570725 |
| 3FIB | A | ALA | 327 | H | -8.708610  | 5.880096  | -15.120915 | -5.290750 |
| 3FIB | A | GLU | 328 | H | -10.329555 | 7.338560  | -16.695619 | -5.383694 |
| 3FIB | A | GLN | 329 | H | -11.570797 | 9.679636  | -18.298359 | -5.897628 |
| 3FIB | A | ASP | 330 | H | -11.917004 | 10.327067 | -18.579721 | -5.948310 |
| 3FIB | A | GLY | 331 | C | -11.935250 | 10.715614 | -18.355217 | -5.940746 |
| 3FIB | A | SER | 332 | C | -12.361131 | 11.422019 | -18.675539 | -6.058531 |
| 3FIB | A | GLY | 333 | C | -12.473351 | 11.752825 | -18.372807 | -6.008049 |
| 3FIB | A | TRP | 334 | B | -12.857448 | 13.841226 | -17.329283 | -5.899221 |
| 3FIB | A | TRP | 335 | C | -13.668208 | 18.165088 | -15.920128 | -5.923559 |
| 3FIB | A | MET | 336 | T | -14.545494 | 16.602359 | -19.709375 | -6.967361 |
| 3FIB | A | ASN | 337 | T | -13.379706 | 12.622920 | -19.062457 | -6.354492 |
| 3FIB | A | LYS | 338 | T | -10.972961 | 11.681485 | -15.527501 | -5.817061 |
| 3FIB | A | CYS | 339 | T | -10.883563 | 11.562869 | -15.715856 | -5.772443 |
| 3FIB | A | HIS | 340 | T | -10.810072 | 11.861664 | -15.610756 | -5.707883 |
| 3FIB | A | ALA | 341 | T | -10.738392 | 11.912736 | -15.622222 | -5.656495 |
| 3FIB | A | GLY | 342 | E | -10.462098 | 11.588797 | -15.688621 | -5.712881 |
| 3FIB | A | HIS | 343 | E | -10.721233 | 11.519545 | -15.919535 | -5.627295 |
| 3FIB | A | LEU | 344 | T | -10.768219 | 11.685119 | -15.815752 | -5.638481 |
| 3FIB | A | ASN | 345 | T | -10.831592 | 11.410416 | -15.951823 | -5.691401 |
| 3FIB | A | GLY | 346 | T | -10.458834 | 12.283916 | -14.722554 | -5.438288 |
| 3FIB | A | VAL | 347 | C | -9.527652  | 13.131509 | -12.294583 | -5.142897 |
| 3FIB | A | TYR | 348 | C | -8.699122  | 13.735256 | -11.436936 | -5.425601 |
| 3FIB | A | TYR | 349 | T | -5.968102  | 9.689629  | -8.923702  | -4.907707 |
| 3FIB | A | GLN | 350 | T | -5.735051  | 9.653244  | -9.084748  | -4.888599 |
| 3FIB | A | GLY | 351 | T | -5.732781  | 9.650727  | -9.100165  | -4.888822 |
| 3FIB | A | GLY | 352 | T | -5.733267  | 9.646105  | -9.099188  | -4.888607 |
| 3FIB | A | THR | 353 | B | -5.735207  | 9.625788  | -9.097646  | -4.886389 |
| 3FIB | A | TYR | 354 | C | -6.383906  | 9.583043  | -9.524165  | -4.851653 |
| 3FIB | A | SER | 355 | T | -6.825992  | 7.152160  | -10.770896 | -4.292378 |
| 3FIB | A | LYS | 356 | T | -5.423364  | 4.956642  | -10.028243 | -4.217662 |
| 3FIB | A | ALA | 357 | T | -4.653336  | 4.930858  | -9.500184  | -4.360114 |
| 3FIB | A | SER | 358 | T | -4.298325  | 5.285650  | -9.349309  | -4.510322 |
| 3FIB | A | THR | 359 | T | -4.234013  | 5.528831  | -9.354428  | -4.546743 |
| 3FIB | A | PRO | 360 | T | -4.238027  | 5.527132  | -9.351954  | -4.554302 |
| 3FIB | A | ASN | 361 | T | -4.315829  | 5.636374  | -9.264937  | -4.601487 |
| 3FIB | A | GLY | 362 | T | -4.630249  | 6.133820  | -9.234599  | -4.730979 |
| 3FIB | A | TYR | 363 | C | -5.552329  | 7.692719  | -9.508242  | -4.880289 |
| 3FIB | A | ASP | 364 | C | -7.359725  | 8.595241  | -11.829159 | -5.337480 |
| 3FIB | A | ASN | 365 | C | -11.516178 | 11.262861 | -17.870846 | -6.443833 |
| 3FIB | A | GLY | 366 | C | -12.226467 | 13.537419 | -17.085125 | -5.853827 |
| 3FIB | A | ILE | 367 | C | -12.584977 | 16.832279 | -14.578000 | -4.855444 |
| 3FIB | A | ILE | 368 | E | -12.593184 | 17.264436 | -14.244914 | -4.778525 |
| 3FIB | A | TRP | 369 | E | -12.305253 | 19.006084 | -13.332614 | -5.121609 |
| 3FIB | A | ALA | 370 | T | -10.192665 | 14.798548 | -12.232336 | -5.284745 |
| 3FIB | A | THR | 371 | T | -10.194832 | 14.779063 | -12.245228 | -5.295042 |
| 3FIB | A | TRP | 372 | T | -10.196427 | 14.764716 | -12.246943 | -5.298640 |
| 3FIB | A | LYS | 373 | T | -10.196911 | 14.758701 | -12.246268 | -5.298901 |
| 3FIB | A | THR | 374 | T | -10.205197 | 14.686006 | -12.234168 | -5.294237 |
| 3FIB | A | ARG | 375 | T | -13.200900 | 15.795186 | -16.816305 | -6.031603 |
| 3FIB | A | TRP | 376 | B | -14.322592 | 17.340707 | -17.661281 | -6.141580 |
| 3FIB | A | TYR | 377 | B | -15.272339 | 16.557068 | -19.557145 | -6.078159 |
| 3FIB | A | SER | 378 | C | -13.537120 | 14.599294 | -18.176096 | -6.457581 |
| 3FIB | A | MET | 379 | C | -12.882621 | 15.417809 | -17.406562 | -6.568889 |
| 3FIB | A | LYS | 380 | C | -12.232789 | 15.628210 | -16.686018 | -6.625864 |
| 3FIB | A | LYS | 381 | E | -12.143858 | 15.743830 | -16.802746 | -6.684547 |
| 3FIB | A | THR | 382 | E | -12.021586 | 16.111293 | -16.589893 | -6.634630 |

|      |   |     |     |   |            |           |            |           |
|------|---|-----|-----|---|------------|-----------|------------|-----------|
| 3FIB | A | THR | 383 | E | -11.903896 | 16.875035 | -15.908850 | -6.486037 |
| 3FIB | A | MET | 384 | E | -11.615041 | 18.354615 | -14.112414 | -6.057260 |
| 3FIB | A | LYS | 385 | E | -11.773525 | 19.159422 | -13.434396 | -5.874319 |
| 3FIB | A | ILE | 386 | E | -11.789048 | 19.404873 | -13.215607 | -5.815767 |
| 3FIB | A | ILE | 387 | E | -11.412702 | 17.498779 | -13.554678 | -5.673804 |
| 3FIB | A | PRO | 388 | E | -10.026860 | 12.840146 | -12.697210 | -4.888658 |
| 3FIB | A | PHE | 389 | T | -9.021120  | 10.010826 | -12.188276 | -4.252436 |
| 3FIB | A | ASN | 390 | T | -9.021120  | 10.010826 | -12.188276 | -4.252436 |
| 3FIB | A | ARG | 391 | T | -9.021120  | 10.010826 | -12.188276 | -4.252436 |
| 3FIB | A | LEU | 392 | C | -9.021120  | 10.010826 | -12.188276 | -4.252436 |
| 3IL8 | A | LEU | 5   | C | -5.948819  | 3.876701  | -10.940440 | -3.827766 |
| 3IL8 | A | ARG | 6   | C | -5.948819  | 3.876701  | -10.940440 | -3.827766 |
| 3IL8 | A | CYS | 7   | C | -5.948819  | 3.876701  | -10.940440 | -3.827766 |
| 3IL8 | A | GLN | 8   | C | -5.948819  | 3.876701  | -10.940440 | -3.827766 |
| 3IL8 | A | CYS | 9   | T | -6.682358  | 7.014782  | -12.403192 | -5.121309 |
| 3IL8 | A | ILE | 10  | T | -6.284552  | 8.300688  | -10.515295 | -4.646197 |
| 3IL8 | A | LYS | 11  | T | -6.148951  | 8.974707  | -9.954024  | -4.545439 |
| 3IL8 | A | THR | 12  | T | -5.774369  | 9.732129  | -8.917905  | -4.369373 |
| 3IL8 | A | TYR | 13  | C | -5.772303  | 9.804942  | -8.840712  | -4.334954 |
| 3IL8 | A | SER | 14  | C | -5.725171  | 10.425947 | -8.350133  | -4.230944 |
| 3IL8 | A | LYS | 15  | C | -5.828101  | 11.042234 | -8.054723  | -4.216799 |
| 3IL8 | A | PRO | 16  | C | -5.866519  | 11.601710 | -7.705281  | -4.167557 |
| 3IL8 | A | PHE | 17  | C | -6.325529  | 12.998939 | -7.563460  | -4.145652 |
| 3IL8 | A | HIS | 18  | C | -6.277744  | 13.016400 | -7.621828  | -4.180487 |
| 3IL8 | A | PRO | 19  | G | -6.675574  | 13.854082 | -7.762067  | -4.264957 |
| 3IL8 | A | LYS | 20  | G | -6.887183  | 13.932677 | -7.848627  | -4.325755 |
| 3IL8 | A | PHE | 21  | G | -7.393748  | 13.423901 | -8.895285  | -4.532886 |
| 3IL8 | A | ILE | 22  | E | -7.519127  | 13.308862 | -8.844708  | -4.524681 |
| 3IL8 | A | LYS | 23  | E | -7.714242  | 13.193136 | -9.520237  | -4.729721 |
| 3IL8 | A | GLU | 24  | E | -7.651723  | 12.811542 | -9.665916  | -4.646537 |
| 3IL8 | A | LEU | 25  | E | -7.178028  | 11.648813 | -9.368706  | -4.289003 |
| 3IL8 | A | ARG | 26  | E | -7.068746  | 11.043730 | -9.709896  | -4.261291 |
| 3IL8 | A | VAL | 27  | E | -5.743551  | 8.346008  | -9.054394  | -4.412764 |
| 3IL8 | A | ILE | 28  | E | -5.455355  | 7.120986  | -9.651659  | -4.398562 |
| 3IL8 | A | GLU | 29  | C | -4.978833  | 5.493411  | -9.951576  | -4.343742 |
| 3IL8 | A | SER | 30  | C | -4.952961  | 5.357713  | -10.088223 | -4.361655 |
| 3IL8 | A | GLY | 31  | B | -4.683309  | 4.665791  | -10.290033 | -4.387362 |
| 3IL8 | A | PRO | 32  | T | -4.766749  | 4.094938  | -10.565553 | -4.387715 |
| 3IL8 | A | HIS | 33  | T | -4.843785  | 3.911238  | -10.597231 | -4.404433 |
| 3IL8 | A | CYS | 34  | B | -5.185622  | 3.705748  | -10.929920 | -4.493418 |
| 3IL8 | A | ALA | 35  | T | -5.235806  | 3.664118  | -10.816320 | -4.485827 |
| 3IL8 | A | ASN | 36  | C | -6.870303  | 5.997133  | -13.398549 | -5.343092 |
| 3IL8 | A | THR | 37  | C | -7.635296  | 8.424972  | -15.167938 | -6.809613 |
| 3IL8 | A | GLU | 38  | E | -8.145375  | 8.400942  | -13.775724 | -5.577970 |
| 3IL8 | A | ILE | 39  | E | -9.014436  | 11.173405 | -12.395914 | -5.139431 |
| 3IL8 | A | ILE | 40  | E | -11.644941 | 15.756008 | -14.802861 | -5.459842 |
| 3IL8 | A | VAL | 41  | E | -11.721408 | 15.669461 | -15.764728 | -5.895452 |
| 3IL8 | A | LYS | 42  | E | -10.100708 | 9.428834  | -15.568024 | -5.681309 |
| 3IL8 | A | LEU | 43  | E | -7.106089  | 6.165962  | -11.455433 | -4.292708 |
| 3IL8 | A | SER | 44  | T | -5.576405  | 5.335471  | -10.445819 | -4.554891 |
| 3IL8 | A | ASP | 45  | T | -5.322090  | 6.317670  | -10.047021 | -4.576521 |
| 3IL8 | A | GLY | 46  | T | -5.311693  | 6.369728  | -10.067179 | -4.580452 |
| 3IL8 | A | ARG | 47  | C | -5.311747  | 6.370322  | -10.066025 | -4.580139 |
| 3IL8 | A | GLU | 48  | E | -5.340449  | 6.389120  | -9.997951  | -4.595668 |
| 3IL8 | A | LEU | 49  | E | -5.914877  | 8.224172  | -9.399079  | -4.626697 |
| 3IL8 | A | CYS | 50  | E | -7.649770  | 9.713879  | -11.262587 | -4.820691 |
| 3IL8 | A | LEU | 51  | E | -8.063759  | 11.812442 | -10.756692 | -4.707849 |
| 3IL8 | A | ASP | 52  | T | -7.135473  | 7.951083  | -11.695955 | -4.829015 |
| 3IL8 | A | PRO | 53  | T | -7.131125  | 7.897407  | -11.730045 | -4.823859 |
| 3IL8 | A | LYS | 54  | T | -7.077677  | 8.164010  | -11.692996 | -4.817780 |
| 3IL8 | A | GLU | 55  | T | -7.087772  | 8.105047  | -11.685842 | -4.818463 |
| 3IL8 | A | ASN | 56  | H | -7.186176  | 7.505291  | -11.903024 | -4.850821 |
| 3IL8 | A | TRP | 57  | H | -8.380286  | 11.006870 | -11.628910 | -4.795092 |
| 3IL8 | A | VAL | 58  | H | -8.513604  | 11.029647 | -11.374387 | -4.750177 |
| 3IL8 | A | GLN | 59  | H | -10.613858 | 11.525789 | -14.323584 | -4.421671 |
| 3IL8 | A | ARG | 60  | H | -9.351914  | 11.565349 | -11.066443 | -3.766517 |
| 3IL8 | A | VAL | 61  | H | -9.369754  | 11.607597 | -10.965542 | -3.749771 |
| 3IL8 | A | VAL | 62  | H | -9.329204  | 11.802520 | -11.053005 | -3.802742 |
| 3IL8 | A | GLU | 63  | H | -9.208302  | 11.843278 | -11.444704 | -3.992169 |
| 3IL8 | A | LYS | 64  | H | -9.192870  | 11.896007 | -11.661693 | -4.159217 |
| 3IL8 | A | PHE | 65  | H | -9.702494  | 12.035047 | -14.509138 | -5.618321 |
| 3IL8 | A | LEU | 66  | H | -7.724970  | 6.415953  | -13.993330 | -5.650749 |
| 3IL8 | A | LYS | 67  | H | -6.901009  | 5.244639  | -13.247956 | -5.178942 |
| 3IL8 | A | ARG | 68  | H | -6.395810  | 4.552351  | -12.466826 | -4.601663 |
| 3IL8 | A | ALA | 69  | H | -3.773882  | 3.352596  | -7.484440  | -3.363095 |
| 3IL8 | A | GLU | 70  | H | -3.773882  | 3.352596  | -7.484440  | -3.363095 |
| 3IL8 | A | ASN | 71  | H | -3.773882  | 3.352596  | -7.484440  | -3.363095 |
| 3IL8 | A | SER | 72  | C | -3.773882  | 3.352596  | -7.484440  | -3.363095 |
| 5PNT | A | ALA | 1   | C | -2.985387  | 1.180323  | -8.641622  | -3.743932 |
| 5PNT | A | GLU | 2   | C | -2.985387  | 1.180323  | -8.641622  | -3.743932 |
| 5PNT | A | GLN | 3   | C | -2.985387  | 1.180323  | -8.641622  | -3.743932 |

|      |   |     |    |   |            |           |            |           |
|------|---|-----|----|---|------------|-----------|------------|-----------|
| 5PNT | A | ALA | 4  | C | -2.985387  | 1.180323  | -8.641622  | -3.743932 |
| 5PNT | A | THR | 5  | C | -3.440657  | 1.776234  | -9.030143  | -4.186966 |
| 5PNT | A | LYS | 6  | E | -5.150200  | 3.896317  | -11.304366 | -5.224865 |
| 5PNT | A | SER | 7  | E | -8.065901  | 5.875201  | -15.796158 | -6.523774 |
| 5PNT | A | VAL | 8  | E | -9.972580  | 9.580852  | -16.996311 | -6.889655 |
| 5PNT | A | LEU | 9  | E | -11.289404 | 15.267347 | -14.101649 | -5.082298 |
| 5PNT | A | PHE | 10 | E | -11.212489 | 15.202922 | -13.466663 | -4.859389 |
| 5PNT | A | VAL | 11 | E | -10.652749 | 11.632719 | -15.046620 | -5.179368 |
| 5PNT | A | CYS | 12 | E | -10.461941 | 10.745584 | -15.583923 | -5.325794 |
| 5PNT | A | LEU | 13 | T | -10.209266 | 10.406177 | -15.594745 | -5.384041 |
| 5PNT | A | GLY | 14 | T | -10.210230 | 10.376808 | -15.616855 | -5.391769 |
| 5PNT | A | ASN | 15 | T | -10.282381 | 9.954394  | -15.807840 | -5.428989 |
| 5PNT | A | ILE | 16 | T | -10.517149 | 10.233138 | -15.694842 | -5.452152 |
| 5PNT | A | CYS | 17 | T | -10.770574 | 10.498959 | -15.384737 | -5.415190 |
| 5PNT | A | ARG | 18 | H | -12.925309 | 13.637506 | -17.898576 | -5.820526 |
| 5PNT | A | SER | 19 | H | -13.075912 | 13.866915 | -17.417313 | -5.288100 |
| 5PNT | A | PRO | 20 | H | -12.710423 | 13.754690 | -16.271899 | -4.796883 |
| 5PNT | A | ILE | 21 | H | -12.080859 | 13.852785 | -14.835717 | -4.550854 |
| 5PNT | A | ALA | 22 | H | -12.034019 | 14.084978 | -14.752918 | -4.542975 |
| 5PNT | A | GLU | 23 | H | -12.044741 | 14.105660 | -14.695531 | -4.526448 |
| 5PNT | A | ALA | 24 | H | -12.075117 | 14.249695 | -14.537035 | -4.490505 |
| 5PNT | A | VAL | 25 | H | -12.158228 | 14.603543 | -14.402304 | -4.549715 |
| 5PNT | A | PHE | 26 | H | -12.984911 | 17.242707 | -15.106444 | -4.933217 |
| 5PNT | A | ARG | 27 | H | -12.686382 | 15.262216 | -16.124158 | -5.284857 |
| 5PNT | A | LYS | 28 | H | -9.201476  | 12.039919 | -11.833913 | -4.840451 |
| 5PNT | A | LEU | 29 | H | -8.731188  | 11.964954 | -11.875001 | -4.909995 |
| 5PNT | A | VAL | 30 | H | -6.555796  | 8.379154  | -10.230307 | -4.748404 |
| 5PNT | A | THR | 31 | H | -5.571120  | 6.255216  | -10.266969 | -4.673796 |
| 5PNT | A | ASP | 32 | H | -5.562081  | 6.265474  | -10.303475 | -4.673656 |
| 5PNT | A | GLN | 33 | H | -5.461503  | 6.244993  | -10.367449 | -4.620190 |
| 5PNT | A | ASN | 34 | C | -5.388693  | 6.244853  | -10.437720 | -4.604617 |
| 5PNT | A | ILE | 35 | C | -5.471634  | 5.966288  | -10.477576 | -4.584850 |
| 5PNT | A | SER | 36 | G | -6.155950  | 6.421122  | -10.916958 | -4.429412 |
| 5PNT | A | GLU | 37 | G | -6.180807  | 6.400651  | -10.841675 | -4.419502 |
| 5PNT | A | ASN | 38 | G | -6.630322  | 6.627389  | -10.974708 | -4.513888 |
| 5PNT | A | TRP | 39 | E | -8.478367  | 12.929172 | -10.676761 | -4.974952 |
| 5PNT | A | ARG | 40 | E | -10.615215 | 13.761727 | -14.378875 | -5.418704 |
| 5PNT | A | VAL | 41 | E | -10.404148 | 12.330129 | -13.942608 | -4.860887 |
| 5PNT | A | ASP | 42 | E | -10.461401 | 11.473707 | -14.184908 | -4.709819 |
| 5PNT | A | SER | 43 | E | -10.351908 | 11.437443 | -14.308588 | -4.729873 |
| 5PNT | A | ALA | 44 | E | -9.383479  | 10.425669 | -13.116850 | -4.650742 |
| 5PNT | A | ALA | 45 | E | -7.934729  | 9.953166  | -11.489854 | -4.865369 |
| 5PNT | A | THR | 46 | C | -7.309650  | 10.019703 | -11.468084 | -5.259808 |
| 5PNT | A | SER | 47 | C | -6.346086  | 8.715948  | -10.341627 | -4.894806 |
| 5PNT | A | GLY | 48 | T | -4.660242  | 7.837508  | -8.406801  | -4.950005 |
| 5PNT | A | TYR | 49 | T | -4.587104  | 8.041168  | -8.434098  | -4.933096 |
| 5PNT | A | GLU | 50 | T | -4.568980  | 8.028181  | -8.473381  | -4.912411 |
| 5PNT | A | ILE | 51 | T | -4.551121  | 8.004329  | -8.479777  | -4.867837 |
| 5PNT | A | GLY | 52 | T | -4.574390  | 7.987720  | -8.417404  | -4.870034 |
| 5PNT | A | ASN | 53 | b | -5.573731  | 8.882687  | -8.987273  | -4.500677 |
| 5PNT | A | PRO | 54 | C | -6.138984  | 7.758470  | -9.534163  | -4.022098 |
| 5PNT | A | PRO | 55 | C | -6.515291  | 7.703594  | -9.225409  | -3.773079 |
| 5PNT | A | ASP | 56 | C | -9.136018  | 7.091341  | -14.237636 | -4.512544 |
| 5PNT | A | TYR | 57 | H | -10.174495 | 8.327763  | -15.244400 | -4.767448 |
| 5PNT | A | ARG | 58 | H | -11.499283 | 9.961559  | -16.527871 | -4.935436 |
| 5PNT | A | GLY | 59 | H | -11.838707 | 10.304621 | -16.823906 | -5.223481 |
| 5PNT | A | GLN | 60 | H | -13.093929 | 9.610687  | -20.821949 | -6.179947 |
| 5PNT | A | SER | 61 | H | -12.860736 | 9.121054  | -20.285227 | -5.885529 |
| 5PNT | A | CYS | 62 | H | -12.494773 | 9.271805  | -19.523916 | -5.781702 |
| 5PNT | A | MET | 63 | H | -10.323439 | 7.928592  | -16.237869 | -5.466977 |
| 5PNT | A | LYS | 64 | H | -8.253085  | 7.995242  | -12.822900 | -4.918643 |
| 5PNT | A | ARG | 65 | H | -7.934229  | 7.913278  | -12.719855 | -4.751790 |
| 5PNT | A | HIS | 66 | H | -7.538303  | 9.424688  | -11.889819 | -4.928213 |
| 5PNT | A | GLY | 67 | C | -6.393896  | 9.570448  | -9.402157  | -4.512132 |
| 5PNT | A | ILE | 68 | C | -6.388111  | 9.598306  | -9.414582  | -4.512174 |
| 5PNT | A | PRO | 69 | C | -6.362280  | 9.619045  | -9.392179  | -4.474043 |
| 5PNT | A | MET | 70 | C | -6.374721  | 9.682095  | -9.317982  | -4.471553 |
| 5PNT | A | SER | 71 | C | -6.416684  | 9.584247  | -9.193349  | -4.424378 |
| 5PNT | A | HIS | 72 | C | -7.717072  | 9.497400  | -10.889897 | -4.286761 |
| 5PNT | A | VAL | 73 | C | -7.781744  | 9.218910  | -10.841594 | -4.247705 |
| 5PNT | A | ALA | 74 | b | -9.181432  | 10.595093 | -11.845288 | -4.339486 |
| 5PNT | A | ARG | 75 | C | -11.668799 | 9.882539  | -16.647883 | -4.694100 |
| 5PNT | A | GLN | 76 | B | -7.807865  | 9.546356  | -11.145853 | -4.761703 |
| 5PNT | A | ILE | 77 | C | -7.232220  | 9.500210  | -10.879236 | -4.730470 |
| 5PNT | A | THR | 78 | C | -7.209121  | 9.597674  | -10.915799 | -4.741124 |
| 5PNT | A | LYS | 79 | H | -7.206570  | 9.612614  | -10.924575 | -4.742319 |
| 5PNT | A | GLU | 80 | H | -7.205219  | 9.619332  | -10.930639 | -4.743267 |
| 5PNT | A | ASP | 81 | H | -7.470718  | 9.661271  | -10.812744 | -4.732896 |
| 5PNT | A | PHE | 82 | H | -9.042484  | 12.158168 | -12.077770 | -5.016187 |
| 5PNT | A | ALA | 83 | H | -10.146657 | 12.754808 | -13.370976 | -5.058208 |
| 5PNT | A | THR | 84 | H | -10.721400 | 12.272214 | -13.967408 | -5.127483 |

|      |   |     |     |   |            |           |            |           |
|------|---|-----|-----|---|------------|-----------|------------|-----------|
| 5PNT | A | PHE | 85  | T | -13.578147 | 17.623117 | -16.198787 | -5.789629 |
| 5PNT | A | ASP | 86  | T | -14.352959 | 18.097453 | -17.705484 | -6.058936 |
| 5PNT | A | TYR | 87  | E | -14.553086 | 18.885629 | -16.979887 | -5.640856 |
| 5PNT | A | ILE | 88  | E | -13.558969 | 16.529457 | -16.329204 | -5.568583 |
| 5PNT | A | LEU | 89  | E | -13.169052 | 15.691294 | -16.919305 | -5.840187 |
| 5PNT | A | CYS | 90  | E | -12.808243 | 13.389896 | -18.022406 | -5.967175 |
| 5PNT | A | MET | 91  | C | -12.634939 | 12.661444 | -18.464520 | -6.060179 |
| 5PNT | A | ASP | 92  | C | -12.207818 | 10.817858 | -18.612865 | -5.898889 |
| 5PNT | A | GLU | 93  | H | -11.502526 | 8.736882  | -17.423275 | -5.087675 |
| 5PNT | A | SER | 94  | H | -11.470423 | 8.458873  | -17.557844 | -5.047210 |
| 5PNT | A | ASN | 95  | H | -11.492406 | 8.384801  | -17.488205 | -4.998645 |
| 5PNT | A | LEU | 96  | H | -11.409122 | 8.606152  | -17.326949 | -4.936365 |
| 5PNT | A | ARG | 97  | H | -11.435262 | 8.530405  | -17.206398 | -4.813624 |
| 5PNT | A | ASP | 98  | H | -11.967051 | 9.410198  | -17.937701 | -5.002918 |
| 5PNT | A | LEU | 99  | H | -12.059821 | 10.133726 | -17.849014 | -5.205503 |
| 5PNT | A | ASN | 100 | H | -11.679496 | 9.917172  | -19.168783 | -6.310012 |
| 5PNT | A | ARG | 101 | H | -11.399163 | 8.389740  | -19.330363 | -6.188596 |
| 5PNT | A | LYS | 102 | H | -10.448458 | 8.986614  | -16.704369 | -5.756240 |
| 5PNT | A | SER | 103 | H | -6.826600  | 5.604830  | -11.607821 | -4.497631 |
| 5PNT | A | ASN | 104 | H | -4.662872  | 5.084217  | -8.593903  | -4.047537 |
| 5PNT | A | GLN | 105 | C | -4.437291  | 5.521563  | -8.565031  | -4.077552 |
| 5PNT | A | VAL | 106 | T | -4.146735  | 5.765476  | -8.293319  | -4.019301 |
| 5PNT | A | LYS | 107 | T | -4.041515  | 5.801072  | -8.322291  | -4.004768 |
| 5PNT | A | THR | 108 | T | -4.046282  | 5.805643  | -8.296074  | -4.000898 |
| 5PNT | A | CYS | 109 | T | -4.295254  | 6.197140  | -8.181585  | -3.981621 |
| 5PNT | A | LYS | 110 | C | -4.465044  | 6.107546  | -8.074710  | -3.927988 |
| 5PNT | A | ALA | 111 | C | -5.108983  | 6.032729  | -8.502658  | -3.935892 |
| 5PNT | A | LYS | 112 | E | -7.570184  | 9.734425  | -11.370562 | -4.756623 |
| 5PNT | A | ILE | 113 | E | -7.884016  | 10.703773 | -10.967615 | -4.839571 |
| 5PNT | A | GLU | 114 | E | -9.473080  | 12.800220 | -12.814060 | -5.067718 |
| 5PNT | A | LEU | 115 | E | -9.724735  | 13.957407 | -12.229385 | -5.059710 |
| 5PNT | A | LEU | 116 | G | -10.648794 | 16.196726 | -12.834665 | -5.345858 |
| 5PNT | A | GLY | 117 | G | -10.974988 | 15.886832 | -13.282356 | -5.386426 |
| 5PNT | A | SER | 118 | G | -11.718171 | 13.749017 | -15.700533 | -5.386073 |
| 5PNT | A | TYR | 119 | G | -10.676240 | 10.466788 | -15.324394 | -5.308802 |
| 5PNT | A | ASP | 120 | T | -9.629691  | 5.985614  | -16.483623 | -5.343877 |
| 5PNT | A | PRO | 121 | T | -8.753737  | 6.714913  | -14.553956 | -4.926790 |
| 5PNT | A | GLN | 122 | T | -8.572389  | 7.195090  | -14.388027 | -4.941208 |
| 5PNT | A | LYS | 123 | T | -8.550763  | 7.334482  | -14.362481 | -4.932884 |
| 5PNT | A | GLN | 124 | C | -8.536249  | 7.479129  | -14.293887 | -4.922779 |
| 5PNT | A | LEU | 125 | C | -7.970455  | 10.359678 | -11.477348 | -4.631591 |
| 5PNT | A | ILE | 126 | C | -7.519123  | 11.669737 | -9.901526  | -4.446670 |
| 5PNT | A | ILE | 127 | C | -7.528511  | 11.871474 | -9.766838  | -4.438053 |
| 5PNT | A | GLU | 128 | C | -7.063732  | 11.038337 | -10.011850 | -4.626931 |
| 5PNT | A | ASP | 129 | C | -6.603997  | 10.282568 | -10.118369 | -4.797016 |
| 5PNT | A | PRO | 130 | T | -6.565997  | 10.037002 | -10.300693 | -4.831401 |
| 5PNT | A | TYR | 131 | T | -6.610955  | 9.577133  | -10.655566 | -4.929127 |
| 5PNT | A | TYR | 132 | T | -6.332049  | 7.686409  | -11.361957 | -4.859406 |
| 5PNT | A | GLY | 133 | T | -6.219169  | 6.207722  | -11.987167 | -4.842530 |
| 5PNT | A | ASN | 134 | C | -6.412646  | 4.883974  | -12.685918 | -4.803716 |
| 5PNT | A | ASP | 135 | H | -6.472426  | 4.449132  | -12.796005 | -4.789882 |
| 5PNT | A | SER | 136 | H | -6.499735  | 4.354999  | -12.726542 | -4.759573 |
| 5PNT | A | ASP | 137 | H | -6.914505  | 4.071031  | -12.929314 | -4.773540 |
| 5PNT | A | PHE | 138 | H | -9.435429  | 10.315465 | -13.064498 | -4.884979 |
| 5PNT | A | GLU | 139 | H | -11.718393 | 11.744798 | -16.127434 | -5.136352 |
| 5PNT | A | THR | 140 | H | -11.775341 | 11.857932 | -15.919553 | -5.112002 |
| 5PNT | A | VAL | 141 | H | -12.757618 | 14.037403 | -16.125881 | -5.269139 |
| 5PNT | A | TYR | 142 | H | -14.148977 | 13.593685 | -18.711471 | -5.545307 |
| 5PNT | A | GLN | 143 | H | -14.186695 | 13.228677 | -18.800818 | -5.538024 |
| 5PNT | A | GLN | 144 | H | -15.384287 | 14.020717 | -21.242543 | -6.181503 |
| 5PNT | A | CYS | 145 | H | -15.379002 | 12.045673 | -22.246189 | -6.160419 |
| 5PNT | A | VAL | 146 | H | -14.905657 | 11.008444 | -21.447029 | -5.646164 |
| 5PNT | A | ARG | 147 | H | -14.869857 | 10.761000 | -21.396119 | -5.518082 |
| 5PNT | A | CYS | 148 | H | -13.765194 | 14.805067 | -17.197059 | -5.262623 |
| 5PNT | A | CYS | 149 | H | -13.133017 | 17.935881 | -15.906907 | -5.798215 |
| 5PNT | A | ARG | 150 | H | -11.921399 | 19.319148 | -13.979939 | -6.528861 |
| 5PNT | A | ALA | 151 | H | -10.130313 | 17.459680 | -11.501414 | -5.828262 |
| 5PNT | A | PHE | 152 | H | -8.805157  | 15.853411 | -9.963653  | -5.228071 |
| 5PNT | A | LEU | 153 | H | -6.435418  | 9.744396  | -8.494430  | -4.118285 |
| 5PNT | A | GLU | 154 | H | -4.931846  | 6.240022  | -7.467402  | -3.280151 |
| 5PNT | A | LYS | 155 | H | -4.931846  | 6.240022  | -7.467402  | -3.280151 |
| 5PNT | A | ALA | 156 | C | -4.931846  | 6.240022  | -7.467402  | -3.280151 |
| 5PNT | A | HIS | 157 | C | -4.931846  | 6.240022  | -7.467402  | -3.280151 |

Table S2. Eigenvectors and eigenvalues of the 4-dimensional energetic space of the 120 human proteins, computed from the data in Table S1.

The first line in each group represents the energetic center of mass, in kcal/mol ( $\Delta G$ ,  $\Delta H_{ap}$ ,  $\Delta H_{pol}$ ,  $T\Delta S_{conf}$ ). In the second through fifth lines, each row is an eigenvector, each column is a thermodynamic quantity. The final value in each row is the square root of the eigenvalue of each eigenvector. The sixth line indicates the type and number of data points, subsets of Table S1, used to generate the eigenvectors and eigenvalues.

|                                         |              |               |              |         |
|-----------------------------------------|--------------|---------------|--------------|---------|
| -8.129790643                            | 9.522003469  | -11.716524440 | -4.559127696 |         |
| 0.554794467                             | -0.651216265 | 0.509542073   | 0.092126818  | 4.90692 |
| -0.145321982                            | -0.688576434 | -0.701700634  | -0.111176597 | 2.65339 |
| -0.592453412                            | -0.223876674 | 0.225075352   | 0.740418311  | 0.92355 |
| 0.565759290                             | 0.227286395  | -0.444211866  | 0.656454978  | 0.16035 |
| 17484 residues in the complete data set |              |               |              |         |
| -9.345680715                            | 10.295732346 | -12.994411528 | -4.622164034 |         |
| 0.532872325                             | -0.689922965 | 0.479523825   | 0.100549936  | 4.13730 |
| -0.172712967                            | -0.655069672 | -0.726722065  | -0.113705746 | 2.63011 |
| -0.598555278                            | -0.206511833 | 0.211927368   | 0.744426781  | 0.99660 |
| 0.572668224                             | 0.228567039  | -0.443867923  | 0.650222640  | 0.16213 |
| 5493 helical residues (H, G, I)         |              |               |              |         |
| -8.874033970                            | 11.118841191 | -11.963001314 | -4.705481633 |         |
| 0.542709216                             | -0.680819908 | 0.483591962   | 0.089943171  | 4.74944 |
| -0.156204686                            | -0.657224249 | -0.724233954  | -0.138353037 | 2.69673 |
| -0.597441354                            | -0.235539961 | 0.201309288   | 0.739634590  | 0.90969 |
| 0.569324716                             | 0.221498232  | -0.448440146  | 0.652464050  | 0.16319 |
| 5101 strand residues (E, B, b)          |              |               |              |         |
| -6.609432243                            | 7.722937874  | -10.515259953 | -4.400519562 |         |
| 0.562979534                             | -0.575243061 | 0.583378627   | 0.108714504  | 4.40595 |
| -0.084313580                            | -0.754142729 | -0.643159127  | -0.102500255 | 2.45716 |
| -0.606738788                            | -0.225308473 | 0.227789606   | 0.727472357  | 0.83466 |
| 0.554809254                             | 0.222711150  | -0.440599150  | 0.669670683  | 0.14705 |
| 6890 coil residues (C, T)               |              |               |              |         |
| -7.934693021                            | 9.065689824  | -11.231849089 | -4.192453242 |         |
| 0.548752323                             | -0.666348163 | 0.496491335   | 0.091363933  | 4.45409 |
| -0.155101038                            | -0.674385316 | -0.713689739  | -0.108605112 | 2.30474 |
| 0.597450298                             | 0.221705085  | -0.227278004  | -0.736372667 | 0.94803 |
| -0.563797568                            | -0.228103982 | 0.438734567   | -0.661523133 | 0.15439 |
| 1118 ALA residues                       |              |               |              |         |
| -8.468699070                            | 8.497661859  | -13.027411725 | -4.812680016 |         |
| 0.562114080                             | -0.618928142 | 0.540644760   | 0.093053527  | 4.93440 |
| -0.119397632                            | -0.717069711 | -0.677898581  | -0.109584437 | 2.44059 |
| -0.597538614                            | -0.230802608 | 0.230998444   | 0.732336999  | 0.86306 |
| 0.559213350                             | 0.222416592  | -0.441357538  | 0.665593579  | 0.16251 |
| 440 CYS residues                        |              |               |              |         |
| -7.791749638                            | 8.169441779  | -12.101158942 | -4.634624398 |         |
| 0.573164954                             | -0.586094762 | 0.566018611   | 0.087165347  | 4.55600 |
| -0.108517454                            | -0.747004234 | -0.649062111  | -0.094482868 | 2.42087 |
| -0.581074307                            | -0.221824165 | 0.244144230   | 0.744002879  | 0.87288 |
| 0.567502024                             | 0.221972171  | -0.445796929  | 0.655694217  | 0.15418 |

|                   |              |               |              |         |
|-------------------|--------------|---------------|--------------|---------|
| 992 ASP residues  |              |               |              |         |
| -8.095154291      | 9.111000743  | -12.195991569 | -4.782776739 |         |
| 0.562680244       | -0.607501701 | 0.552243077   | 0.096748180  | 4.75664 |
| -0.127898949      | -0.733646408 | -0.662219524  | -0.082886117 | 2.44699 |
| -0.588356927      | -0.203209078 | 0.245755394   | 0.743065598  | 0.89353 |
| 0.566452935       | 0.226739283  | -0.442828603  | 0.656980364  | 0.15850 |
| 1149 GLU residues |              |               |              |         |
| -9.626764534      | 12.880710689 | -12.201727535 | -4.806243724 |         |
| 0.538724540       | -0.713717145 | 0.440836334   | 0.077762676  | 4.34913 |
| -0.210321042      | -0.628331442 | -0.740895186  | -0.109722291 | 2.38872 |
| 0.582963769       | 0.213108751  | -0.235466006  | -0.747859388 | 0.91832 |
| -0.570696218      | -0.224481838 | 0.448657341   | -0.650092548 | 0.15469 |
| 721 PHE residues  |              |               |              |         |
| -6.396875829      | 7.428780140  | -10.566543536 | -4.523816990 |         |
| 0.566833488       | -0.623278495 | 0.532115088   | 0.084126384  | 4.27926 |
| -0.124990462      | -0.711413423 | -0.682501301  | -0.111625719 | 2.32219 |
| -0.596254130      | -0.239389396 | 0.239687993   | 0.727820991  | 0.82886 |
| 0.554579295       | 0.219334396  | -0.439994516  | 0.671371026  | 0.14498 |
| 1182 GLY residues |              |               |              |         |
| -8.669477153      | 10.006104639 | -12.315058345 | -4.684310698 |         |
| 0.565231152       | -0.601771563 | 0.555687572   | 0.097959449  | 4.86526 |
| -0.124197648      | -0.738117128 | -0.656522076  | -0.093470921 | 2.49141 |
| -0.585876450      | -0.208322072 | 0.238857036   | 0.745853884  | 0.92156 |
| 0.567307213       | 0.222836275  | -0.450707669  | 0.652203279  | 0.16494 |
| 443 HIS residues  |              |               |              |         |
| -8.248504716      | 11.049984607 | -10.876807284 | -4.405631025 |         |
| 0.545573980       | -0.693062085 | 0.463839333   | 0.082867676  | 4.87727 |
| -0.169862618      | -0.641985594 | -0.737485090  | -0.122950925 | 2.56139 |
| -0.591361676      | -0.232803376 | 0.215249892   | 0.741458994  | 0.95708 |
| 0.569022927       | 0.230915637  | -0.441176040  | 0.654411627  | 0.15852 |
| 863 ILE residues  |              |               |              |         |
| -7.732935352      | 8.858890240  | -11.714808212 | -4.693669408 |         |
| 0.563486840       | -0.594061163 | 0.564862633   | 0.102489623  | 4.40801 |
| -0.108665405      | -0.742025970 | -0.654231983  | -0.097825365 | 2.49491 |
| -0.591672801      | -0.214222919 | 0.230250253   | 0.742304963  | 0.93256 |
| 0.566213483       | 0.224938515  | -0.447096790  | 0.654911762  | 0.16177 |
| 1133 LYS residues |              |               |              |         |
| -8.595834214      | 10.987111084 | -11.356325599 | -4.437591222 |         |
| 0.536151002       | -0.696889563 | 0.468063144   | 0.088339870  | 4.66455 |
| -0.197497883      | -0.651590327 | -0.726730468  | -0.091035483 | 2.46311 |
| -0.593655294      | -0.197735860 | 0.245891560   | 0.740277828  | 0.90493 |
| 0.566665758       | 0.225112221  | -0.438539692  | 0.660225224  | 0.16410 |
| 1533 LEU residues |              |               |              |         |
| -8.733040500      | 10.117706459 | -12.529929319 | -4.822137577 |         |
| 0.566195322       | -0.622136486 | 0.532883833   | 0.091672630  | 5.22819 |
| -0.158839073      | -0.725033863 | -0.667536162  | -0.059089068 | 2.36256 |
| -0.591652938      | -0.189378481 | 0.281745833   | 0.731233121  | 0.83777 |
| -0.551488719      | -0.226733062 | 0.437092184   | -0.673351865 | 0.17197 |
| 392 MET residues  |              |               |              |         |

|                   |              |               |              |         |
|-------------------|--------------|---------------|--------------|---------|
| -7.704065480      | 8.118910322  | -12.170634084 | -4.734736130 |         |
| 0.579773904       | -0.539367462 | 0.603196710   | 0.095387053  | 4.51497 |
| -0.061659235      | -0.776414321 | -0.619224403  | -0.099699945 | 2.36495 |
| -0.589543302      | -0.237452766 | 0.238192344   | 0.734383609  | 0.87009 |
| 0.559016148       | 0.223337696  | -0.442695465  | 0.664561469  | 0.15386 |
| 777 ASN residues  |              |               |              |         |
| -6.416408312      | 8.374496239  | -9.413883246  | -4.014081557 |         |
| 0.548333358       | -0.657604253 | 0.507838563   | 0.094800680  | 4.52197 |
| -0.135907294      | -0.679608300 | -0.710020514  | -0.124629997 | 2.31166 |
| -0.613127951      | -0.238280699 | 0.218936157   | 0.720668706  | 0.82694 |
| 0.552208160       | 0.221159474  | -0.435933278  | 0.675364206  | 0.14418 |
| 805 PRO residues  |              |               |              |         |
| -8.596583714      | 8.975238527  | -12.882609403 | -4.775286924 |         |
| 0.557418841       | -0.579266549 | 0.583273306   | 0.116304561  | 4.96375 |
| -0.087085414      | -0.752976225 | -0.644217569  | -0.102111014 | 2.32687 |
| -0.606165688      | -0.216172029 | 0.218330348   | 0.733597077  | 0.88344 |
| 0.560592120       | 0.225270337  | -0.443968279  | 0.661726468  | 0.16106 |
| 790 GLN residues  |              |               |              |         |
| -9.350945555      | 9.669734199  | -13.307446179 | -4.641403512 |         |
| 0.566903592       | -0.505209738 | 0.639009017   | 0.122682170  | 4.97678 |
| -0.021124726      | -0.798483488 | -0.592634842  | -0.103739142 | 2.53704 |
| -0.582787987      | -0.226122547 | 0.193054291   | 0.756278254  | 1.00964 |
| 0.581835223       | 0.236761133  | -0.450756543  | 0.634216429  | 0.16573 |
| 898 ARG residues  |              |               |              |         |
| -8.112398204      | 8.335346089  | -12.207684980 | -4.470031530 |         |
| 0.563706426       | -0.600960801 | 0.557956651   | 0.098820831  | 4.43821 |
| -0.110456127      | -0.734633382 | -0.661602756  | -0.101956024 | 2.38776 |
| -0.601179000      | -0.224104808 | 0.236778034   | 0.729586875  | 0.85133 |
| 0.555534265       | 0.221216963  | -0.441477441  | 0.668986102  | 0.15613 |
| 1158 SER residues |              |               |              |         |
| -7.399774980      | 9.169390730  | -10.970804126 | -4.575507383 |         |
| 0.546823845       | -0.651058418 | 0.516607963   | 0.101108020  | 4.42783 |
| -0.147924019      | -0.693686463 | -0.696935110  | -0.105825462 | 2.34976 |
| -0.601006348      | -0.211146487 | 0.225811364   | 0.737033079  | 0.83105 |
| 0.563820483       | 0.224363965  | -0.443178173  | 0.659818445  | 0.15741 |
| 1050 THR residues |              |               |              |         |
| -8.133288207      | 10.263927187 | -10.925712458 | -4.252779356 |         |
| 0.541443644       | -0.692618689 | 0.468521241   | 0.087212260  | 4.74383 |
| -0.164277021      | -0.643077505 | -0.735529565  | -0.135869945 | 2.40616 |
| -0.597934245      | -0.236505152 | 0.203960146   | 0.738200657  | 0.89476 |
| 0.567738037       | 0.225379650  | -0.444841955  | 0.654975701  | 0.15970 |
| 1158 VAL residues |              |               |              |         |
| -9.921118993      | 12.942561764 | -12.677726118 | -4.938081239 |         |
| 0.563564577       | -0.628193991 | 0.528944557   | 0.089358458  | 4.99226 |
| -0.109500041      | -0.700416726 | -0.693322997  | -0.129342077 | 2.38645 |
| -0.587912890      | -0.248698885 | 0.205720027   | 0.741745622  | 0.95257 |
| 0.569879937       | 0.230081691  | -0.444072234  | 0.651996261  | 0.14545 |
| 280 TRP residues  |              |               |              |         |



|              |              |               |              |         |
|--------------|--------------|---------------|--------------|---------|
| -9.950454616 | 12.523347314 | -12.960132100 | -4.941445736 |         |
| 0.561044296  | -0.619681045 | 0.540314590   | 0.096357902  | 4.96615 |
| -0.105286148 | -0.711048249 | -0.685238986  | -0.117357347 | 2.59556 |
| -0.593224161 | -0.237854511 | 0.211311316   | 0.739498380  | 1.03869 |
| 0.567652377  | 0.232015133  | -0.440289909  | 0.655808320  | 0.17142 |

602 TYR residues
